# Supplementary material for: Cobalt(III)-catalyzed asymmetric ring-opening of 7-oxabenzonorbornadienes via indole C–H functionalization
Source: PubMed Central journal article supplement (PMC9968317; doi:10.1038/s41467-023-36723-6), 2023-02-25
Supplement: 41467_2023_36723_MOESM1_ESM.pdf [file 41467_2023_36723_MOESM1_ESM.pdf]

Supplementary Information

**Cobalt(III)-catalyzed asymmetric ring-opening of 7-oxabenzonorbornadienes via indole C–H functionalization**

Yang Zheng, Wen-Yun Zhang, Qing Gu, Chao Zheng,\* and Shu-Li You\*

Laboratory of Organometallic Chemistry, Shanghai Institute of Organic Chemistry, Chinese Academy of Sciences, 345 Lingling Lu, Shanghai 200032, China.

E-mail: [zhengchao@sioc.ac.cn](mailto:zhengchao@sioc.ac.cn) or [slyou@sioc.ac.cn](mailto:slyou@sioc.ac.cn)

**Table of Contents**

|                                                        |      |
|--------------------------------------------------------|------|
| 1. Supplementary Methods                               | S3   |
| 1.1 General information                                | S3   |
| 1.2 General procedure and characterization of products | S4   |
| 1.3 Gram-scale reaction and derivatization reactions   | S19  |
| 1.4 Mechanistic experiments                            | S22  |
| 1.5 Control experiment                                 | S28  |
| 1.6 X-Ray crystal structures                           | S31  |
| 1.7 Absolute configuration of <i>cis</i> - <b>7</b>    | S37  |
| 1.8 Computational calculations                         | S38  |
| 1.9 Copies of NMR spectra                              | S41  |
| 1.10 Copies of HPLC chromatograms                      | S146 |
| 2. Supplementary References                            | S194 |

### 1. Supplementary Notes

#### 1.1 General information

Unless otherwise noted, materials were purchased from commercial suppliers (Shanghai Bidepharm, Adamas-beta®, J&K Scientific, TCI Shanghai and others) and used without further purification. All the solvents were treated according to standard methods. Flash column chromatography was performed using 200–300 mesh silica gel.  $^1\text{H}$  and  $^{13}\text{C}$  NMR spectra were recorded on Bruker, Agilent, and Varian instruments (400 MHz and 100 MHz, respectively) and internally referenced to tetramethylsilane signal or residual protic solvent signals. Data for  $^1\text{H}$  NMR are recorded as follows: chemical shift ( $\delta$ , ppm), multiplicity (s = singlet, d = doublet, t = triplet, sept = septet, m = multiplet, br = broad singlet, coupling constant (s) in Hz, integration). Data for  $^{13}\text{C}$  NMR and  $^{19}\text{F}$  NMR are reported in terms of chemical shift ( $\delta$ , ppm). All air- and moisture-sensitive reactions were performed under an atmosphere of argon in flame-dried glassware. **Co-1** to **Co-7** were prepared according to the known procedures.<sup>[1]</sup>

## 1.2 General procedure and characterization of products

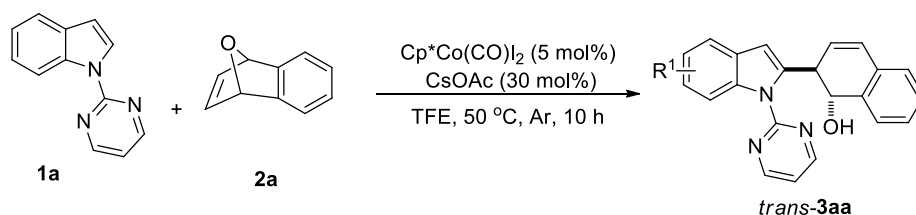

**Procedure for the synthesis of *trans*-3aa.**<sup>[2]</sup> A sealed tube with a magnetic stir bar was charged with  $\text{Cp}^*\text{Co}(\text{CO})\text{I}_2$  (2.4 mg, 0.005 mmol),  $\text{CsOAc}$  (5.7 mg, 0.03 mmol), **1a** (19.5 mg, 0.1 mmol), **2a** (21.6 mg, 0.15 mmol), TFE (0.3 mL) under argon atmosphere. The mixture was stirred at 50 °C for 10 h. Then, the mixture was cooled to room temperature and quenched by saturated  $\text{NH}_4\text{Cl}$  aqueous solution (20 mL). The resulting mixture was extracted with ethyl acetate ( $3 \times 15$  mL). The combined organic phase was dried over anhydrous  $\text{Na}_2\text{SO}_4$  and filtered. All the volatiles were evaporated under reduced pressure. The remaining residue was purified by column chromatography on silica gel (hexanes/ethyl acetate = 8:1 to 4:1) to afford *trans*-3aa.

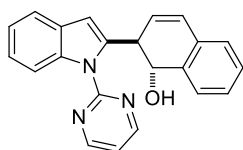

*trans*-3aa, 32.2 mg, 95% yield, pale yellow foam.  $^1\text{H NMR}$  (400 MHz,  $\text{CDCl}_3$ )  $\delta$  8.80 (d,  $J$  = 4.8 Hz, 2H), 8.17 (d,  $J$  = 8.0 Hz, 1H), 7.62-7.60 (m, 1H), 7.54 (dd,  $J$  = 7.6, 1.6 Hz, 1H), 7.29-7.26 (m, 2H), 7.24-7.15 (m, 3H), 7.15-7.11 (m, 1H), 6.68 (s, 1H), 6.58 (dd,  $J$  = 9.6, 2.4 Hz, 1H), 6.06 (dd,  $J$  = 9.6, 3.2 Hz, 1H), 5.12 (d,  $J$  = 10.4 Hz, 1H), 4.82 (br, 1H), 4.68 (dt,  $J$  = 10.4, 3.2 Hz, 1H).  $^{13}\text{C NMR}$  (100 MHz,  $\text{CDCl}_3$ )  $\delta$  158.4, 157.4, 141.8, 138.1, 136.9, 132.5, 130.5, 129.4, 128.1, 127.9, 127.7, 126.2, 125.9, 123.2, 122.4, 120.4, 117.6, 113.8, 106.8, 75.1, 41.9.

**IR** (thin film):  $\nu_{\text{max}}$  ( $\text{cm}^{-1}$ ) = 3251, 3036, 2923, 2852, 1563, 1452, 1424, 1347, 1262, 1198, 1153, 1078, 991, 845, 792, 741, 690, 635, 522.

**HRMS** (ESI) calcd for  $\text{C}_{22}\text{H}_{17}\text{ON}_3\text{Na}$   $[\text{M}+\text{Na}]^+$ : 362.1269. Found: 362.1272.

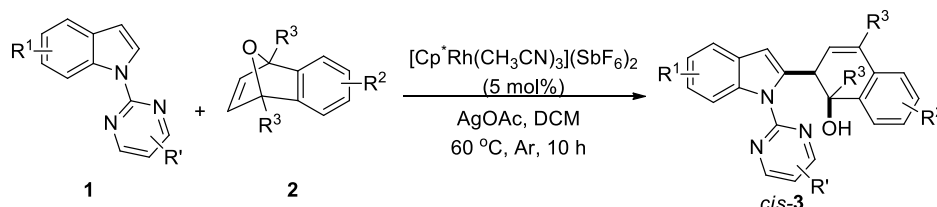

**Procedure for the synthesis of racemic products of *cis*-3.** A sealed tube with a magnetic stir bar was charged with  $[\text{Cp}^*\text{Rh}(\text{CH}_3\text{CN})_3](\text{SbF}_6)_2$  (4.2 mg, 0.005 mmol),  $\text{AgOAc}$  (36.7 mg, 0.22 mmol), **1** (0.1 mmol), **2** (0.15 mmol), and DCM (1.0 mL) under argon atmosphere. The mixture was stirred at 60 °C for 10 h. Afterwards, the mixture was cooled to room temperature and quenched by saturated  $\text{NH}_4\text{Cl}$  aqueous solution (20 mL). The resulting mixture was extracted with ethyl acetate ( $3 \times 15$  mL). The combined organic phase was dried over anhydrous  $\text{Na}_2\text{SO}_4$  and filtered. All the volatiles were evaporated under reduced pressure. The remaining residue was purified by column chromatography on silica gel (hexanes/ethyl acetate = 8:1 to 4:1) to afford racemic products of *cis*-3.

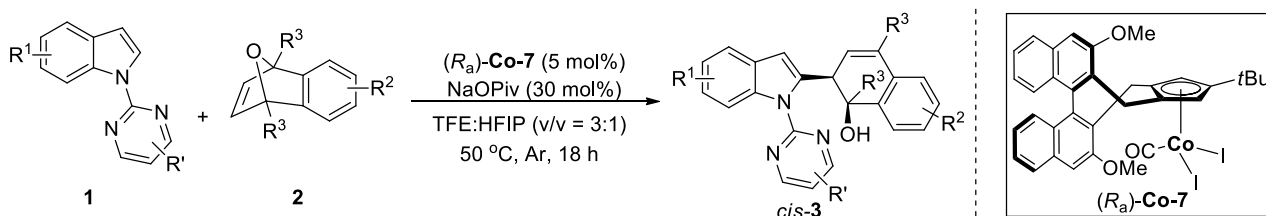

**General procedure.** A sealed tube with a magnetic stir bar was charged with  $(R_a)\text{-Co-7}$  (4.0 mg, 0.005 mmol),  $\text{NaOPiv}\cdot\text{H}_2\text{O}$  (4.4 mg, 0.03 mmol), **1** (0.1 mmol), **2** (0.15 mmol), TFE (0.3 mL) and HFIP (0.1 mL) under argon atmosphere. The mixture was stirred at 50 °C for 18 h. Afterwards, the mixture was cooled to room temperature and quenched by saturated  $\text{NH}_4\text{Cl}$  aqueous solution (20 mL). The resulting mixture was extracted with ethyl acetate ( $3 \times 15$  mL). The combined organic phase was dried over anhydrous  $\text{Na}_2\text{SO}_4$  and filtered. All the volatiles were evaporated under reduced pressure. The remaining residue was purified by column chromatography on silica gel

## SUPPLEMENTARY INFORMATION

(hexanes/ethyl acetate = 8:1 to 4:1) to afford *cis*-3.

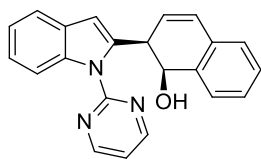

*cis*-**3aa**, 33.6 mg, 99% yield, pale yellow foam. **<sup>1</sup>H NMR** (400 MHz, CDCl<sub>3</sub>) δ 8.85 (d, *J* = 4.8 Hz, 2H), 8.12 (d, *J* = 8.4 Hz, 1H), 7.53-7.51 (m, 1H), 7.43 (d, *J* = 8.0 Hz, 1H), 7.32-7.28 (m, 2H), 7.26-7.18 (m, 3H), 7.14 (td, *J* = 7.6, 1.2 Hz, 1H), 6.66 (dd, *J* = 9.6, 1.6 Hz, 1H), 6.45 (s, 1H), 6.03 (m, 1H), 5.74 (br, 1H), 5.40 (d, *J* = 7.2 Hz, 1H), 4.69 (m, 1H). **<sup>13</sup>C NMR** (100 MHz, CDCl<sub>3</sub>) δ 158.5, 157.3, 137.2, 136.5, 136.4, 132.1, 129.2, 128.9, 128.3, 127.9, 127.6, 126.0, 125.97, 123.2, 122.3, 120.4, 117.7, 113.8, 109.3, 70.7, 38.8.

**IR** (thin film):  $\nu_{\max}$  (cm<sup>-1</sup>) = 3251, 3036, 2924, 2852, 1563, 1452, 1424, 1347, 1262, 1198, 1153, 1078, 991, 845, 792, 742, 690, 635, 522.

**HRMS** (ESI) calcd for C<sub>22</sub>H<sub>17</sub>ON<sub>3</sub>Na [M+Na]<sup>+</sup>: 362.1269. Found: 362.1272.

**HPLC** conditions: Chiralcel AD-H column (4.6 mm × 250 mm), hexane/*i*-PrOH, 80:20 v/v, flow rate = 1 mL/min, λ = 254 nm, 25 °C. t<sub>R</sub> (minor) = 16.49 min, t<sub>R</sub> (major) = 19.89 min, ee > 99%. [α]<sub>D</sub><sup>35</sup> = +211.6 (*c* = 1.0, CHCl<sub>3</sub>).

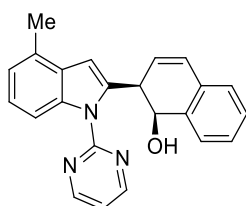

*cis*-**3ba**, 27.2 mg, 77% yield, pale yellow foam. **<sup>1</sup>H NMR** (400 MHz, CDCl<sub>3</sub>) δ 8.85 (d, *J* = 4.8 Hz, 2H), 7.94 (d, *J* = 8.4 Hz, 1H), 7.52-7.49 (m, 1H), 7.33-7.25 (m, 3H), 7.23-7.18 (m, 1H), 7.14-7.10 (m, 1H), 6.95 (d, *J* = 7.2 Hz, 1H), 6.67 (dd, *J* = 9.6, 1.6 Hz, 1H), 6.48 (s, 1H), 6.03 (dd, *J* = 9.6, 5.2 Hz, 1H), 5.45 (br, 1H), 5.35 (d, *J* = 7.2 Hz, 1H), 4.74-4.71 (m, 1H), 2.41 (s, 3H). **<sup>13</sup>C NMR** (100 MHz, CDCl<sub>3</sub>) δ 158.4, 157.4, 136.9, 136.1, 136.0, 132.0, 129.6, 128.9, 128.8, 128.2, 127.8, 127.6, 126.2, 126.0, 123.2, 122.5, 117.6, 111.2, 107.5, 70.4, 39.1, 18.6.

**IR** (thin film):  $\nu_{\max}$  (cm<sup>-1</sup>) = 3033, 2962, 2918, 2853, 1564, 1422, 1346, 1299, 1261, 1198, 1157, 1074, 906, 795, 768, 727, 700, 643, 523, 461.

**HRMS** (ESI) calcd for C<sub>23</sub>H<sub>19</sub>ON<sub>3</sub>Na [M+Na]<sup>+</sup>: 376.1426. Found: 376.1424.

**HPLC** conditions: Chiralcel AD-H column (4.6 mm × 250 mm), hexane/*i*-PrOH, 80:20 v/v, flow rate = 1 mL/min, λ = 254 nm, 25 °C. t<sub>R</sub> (minor) = 13.06 min, t<sub>R</sub> (major) = 18.76 min, ee > 99%. [α]<sub>D</sub><sup>35</sup> = +91.1 (*c* = 1.0, CHCl<sub>3</sub>).

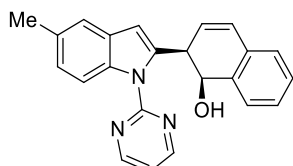

*cis*-**3ca**, 33.9 mg, 96% yield, pale yellow foam. **<sup>1</sup>H NMR** (400 MHz, CDCl<sub>3</sub>) δ 8.84 (d, *J* = 4.8 Hz, 2H), 8.03 (d, *J* = 8.4 Hz, 1H), 7.53-7.47 (m, 1H), 7.31-7.26 (m, 2H), 7.24-7.17 (m, 3H), 7.03 (dd, *J* = 8.8, 1.6 Hz, 1H), 6.65 (dd, *J* = 9.6, 1.6 Hz, 1H), 6.37 (s, 1H), 6.02 (dd, *J* = 9.6, 5.2 Hz, 1H), 5.62 (br, 1H), 5.38 (d, *J* = 7.2 Hz, 1H), 4.74-4.70 (m, 1H), 2.39 (s, 3H). **<sup>13</sup>C NMR** (100 MHz, CDCl<sub>3</sub>) δ 158.4, 157.5, 136.53, 136.48, 135.5, 132.2, 131.7, 129.5, 129.1, 128.3, 127.9, 127.6, 126.1, 126.0, 124.7, 120.2, 117.4, 113.7, 109.2, 70.7, 39.0, 21.4.

**IR** (thin film):  $\nu_{\max}$  (cm<sup>-1</sup>) = 2920, 1563, 1423, 1335, 1297, 1262, 1216, 1172, 1078, 867, 794, 749, 701, 665, 591.

**HRMS** (ESI) calcd for C<sub>23</sub>H<sub>19</sub>ON<sub>3</sub>Na [M+Na]<sup>+</sup>: 376.1426. Found: 376.1428.

**HPLC** conditions: Chiralcel AD-H column (4.6 mm × 250 mm), hexane/*i*-PrOH, 80:20 v/v, flow rate = 1 mL/min, λ = 254 nm, 25 °C. t<sub>R</sub> (minor) = 14.12 min, t<sub>R</sub> (major) = 20.02 min, ee = 92%. [α]<sub>D</sub><sup>35</sup> = +112.0 (*c* = 1.0, CHCl<sub>3</sub>).

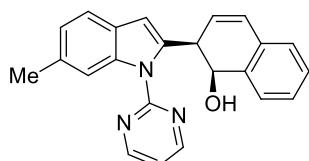

*cis*-**3da**, 35.0 mg, 99% yield, pale yellow foam. **<sup>1</sup>H NMR** (400 MHz, CDCl<sub>3</sub>) δ 8.84 (d, *J* = 4.8 Hz, 2H), 7.92 (s, 1H), 7.53-7.51 (m, 1H), 7.32-7.28 (m, 3H), 7.23-7.19 (m, 2H), 6.99 (dd, *J* = 8.0, 1.6 Hz, 1H), 6.65 (dd, *J* = 9.6, 1.6 Hz, 1H), 6.40 (s, 1H), 6.02 (dd, *J* = 9.6, 5.2 Hz, 1H), 5.83 (br, 1H), 5.39 (d, *J* = 7.2 Hz, 1H), 4.68-4.64 (m, 1H), 2.45 (s,

## SUPPLEMENTARY INFORMATION

3H).  $^{13}\text{C}$  NMR (100 MHz,  $\text{CDCl}_3$ )  $\delta$  158.5, 157.4, 137.6, 136.5, 135.8, 133.1, 132.2, 129.1, 128.3, 127.8, 127.6, 127.0, 126.1, 126.0, 123.9, 120.0, 117.6, 113.8, 109.2, 70.7, 38.9, 22.2.

IR (thin film):  $\nu_{\text{max}}$  ( $\text{cm}^{-1}$ ) = 3030, 1564, 1486, 1422, 1341, 1266, 1197, 1126, 1077, 907, 811, 794, 727, 701, 646, 597, 546, 520, 465.

HRMS (ESI) calcd for  $\text{C}_{23}\text{H}_{19}\text{ON}_3\text{Na}$   $[\text{M}+\text{Na}]^+$ : 376.1426. Found: 376.1430.

HPLC conditions: Chiralcel AD-H column (4.6 mm  $\times$  250 mm), hexane/*i*-PrOH, 80:20 v/v, flow rate = 1 mL/min,  $\lambda$  = 254 nm, 25  $^\circ\text{C}$ .  $t_{\text{R}}$  (minor) = 13.91 min,  $t_{\text{R}}$  (major) = 20.39 min, ee = 99%.  $[\alpha]_{\text{D}}^{34}$  = +174.3 ( $c$  = 1.0,  $\text{CHCl}_3$ ).

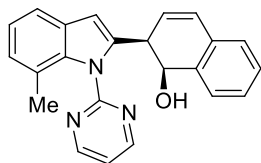

*cis*-**3ea**, 27.5 mg, 78% yield, pale yellow foam.  $^1\text{H}$  NMR (400 MHz,  $\text{CDCl}_3$ )  $\delta$  8.89 (d,  $J$  = 4.8 Hz, 2H), 7.48-7.46 (m, 1H), 7.38-7.31 (m, 2H), 7.28-7.25 (m, 2H), 7.19-7.14 (m, 1H), 7.06 (t,  $J$  = 7.6 Hz, 1H), 6.97 (d,  $J$  = 7.2 Hz, 1H), 6.67 (d,  $J$  = 9.6 Hz, 1H), 6.43 (s, 1H), 5.96 (dd,  $J$  = 9.6, 5.2 Hz, 1H), 5.28 (br, 1H), 5.24 (d,  $J$  = 7.2 Hz, 1H), 4.00-3.96 (m, 1H), 1.95 (s, 3H).  $^{13}\text{C}$  NMR (100 MHz,  $\text{CDCl}_3$ )  $\delta$  158.5, 158.1, 137.4, 137.1, 136.1, 132.0, 129.8, 128.5, 128.3, 127.8, 127.7, 126.1, 126.1, 125.8, 122.3, 121.9, 119.2, 118.5, 107.1, 70.4, 38.7, 20.5.

IR (thin film):  $\nu_{\text{max}}$  ( $\text{cm}^{-1}$ ) = 2962, 1561, 1457, 1417, 1344, 1261, 1221, 1075, 907, 794, 764, 726, 636, 522.

HRMS (ESI) calcd for  $\text{C}_{23}\text{H}_{19}\text{ON}_3\text{Na}$   $[\text{M}+\text{Na}]^+$ : 376.1426. Found: 376.1430.

HPLC conditions: Chiralcel AD-H column (4.6 mm  $\times$  250 mm), hexane/*i*-PrOH, 80:20 v/v, flow rate = 1 mL/min,  $\lambda$  = 254 nm, 25  $^\circ\text{C}$ .  $t_{\text{R}}$  (minor) = 13.85 min,  $t_{\text{R}}$  (major) = 18.17 min, ee = 74%.  $[\alpha]_{\text{D}}^{34}$  = +324.0 ( $c$  = 1.0,  $\text{CHCl}_3$ ).

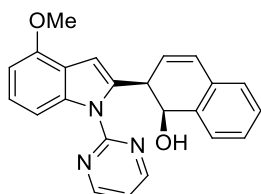

*cis*-**3fa**, 36.5 mg, 99% yield, pale yellow foam.  $^1\text{H}$  NMR (400 MHz,  $\text{CDCl}_3$ )  $\delta$  8.82 (d,  $J$  = 4.8 Hz, 2H), 7.72 (d,  $J$  = 8.4 Hz, 1H), 7.52-7.50 (m, 1H), 7.31-7.27 (m, 2H), 7.22-7.18 (m, 2H), 7.14 (t,  $J$  = 8.0 Hz, 1H), 6.65 (dd,  $J$  = 9.6, 1.6 Hz, 1H), 6.59 (d,  $J$  = 7.6 Hz, 2H), 6.01 (dd,  $J$  = 9.6, 5.2 Hz, 1H), 5.61 (br, 1H), 5.35 (d,  $J$  = 7.2 Hz, 1H), 4.70-4.66 (m, 1H), 3.87 (s, 3H).  $^{13}\text{C}$  NMR (100 MHz,  $\text{CDCl}_3$ )  $\delta$  158.4, 157.4, 152.6, 138.5, 136.3, 135.1, 132.1, 128.8, 128.2, 127.9, 127.7, 126.2, 126.0, 124.0, 119.7, 117.8, 107.1, 106.1, 102.4, 70.5, 55.4, 39.0.

IR (thin film):  $\nu_{\text{max}}$  ( $\text{cm}^{-1}$ ) = 3003, 1564, 1493, 1423, 1356, 1303, 1254, 1216, 1187, 1145, 1110, 1077, 1036, 991, 820, 794, 747, 700, 664, 546, 521, 463.

HRMS (ESI) calcd for  $\text{C}_{23}\text{H}_{19}\text{O}_2\text{N}_3\text{Na}$   $[\text{M}+\text{Na}]^+$ : 392.1375. Found: 392.1377.

HPLC conditions: Chiralcel OD-H column (4.6 mm  $\times$  250 mm), hexane/*i*-PrOH, 80:20 v/v, flow rate = 1 mL/min,  $\lambda$  = 254 nm, 25  $^\circ\text{C}$ .  $t_{\text{R}}$  (minor) = 32.90 min,  $t_{\text{R}}$  (major) = 79.27 min, ee > 99%.  $[\alpha]_{\text{D}}^{30}$  = +296.8 ( $c$  = 1.0,  $\text{CHCl}_3$ ).

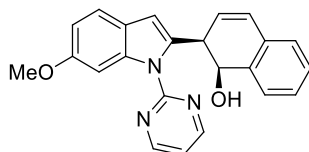

*cis*-**3ga**, 36.6 mg, 99% yield, pale yellow foam.  $^1\text{H}$  NMR (400 MHz,  $\text{CDCl}_3$ )  $\delta$  8.83 (d,  $J$  = 4.8 Hz, 2H), 7.75 (d,  $J$  = 2.3 Hz, 1H), 7.52-7.50 (m, 1H), 7.30 (d,  $J$  = 1.6 Hz, 1H), 7.29-7.28 (dd,  $J$  = 3.6, 2.0 Hz, 2H), 7.22 (t,  $J$  = 4.8 Hz, 1H), 7.20-7.16 (m, 1H), 6.81 (dd,  $J$  = 8.4, 2.4 Hz, 1H), 6.67-6.59 (m, 1H), 6.38 (s, 1H), 6.02 (dd,  $J$  = 9.6, 5.2 Hz, 1H), 5.62 (br, 1H), 5.44-5.29 (m, 1H), 4.71-4.67 (m, 1H), 3.83 (s, 3H).  $^{13}\text{C}$  NMR (100 MHz,  $\text{CDCl}_3$ )  $\delta$  158.4, 157.5, 157.2, 138.0, 136.5, 135.4, 132.2, 129.1, 128.3, 127.7, 127.6, 126.03, 126.0, 123.4, 120.7, 117.5, 111.1, 109.2, 98.9, 70.6, 55.9, 38.9.

IR (thin film):  $\nu_{\text{max}}$  ( $\text{cm}^{-1}$ ) = 3249, 3230, 2923, 2780, 1615, 1568, 1485, 1434, 1348, 1269, 1233, 1199, 1160, 1136, 1082, 1026, 945, 844, 796, 780, 750, 701, 661, 608, 549, 465, 439.

HRMS (ESI) calcd for  $\text{C}_{23}\text{H}_{19}\text{O}_2\text{N}_3\text{Na}$   $[\text{M}+\text{Na}]^+$ : 392.1375. Found: 392.1377.

HPLC conditions: Chiralcel OD-H column (4.6 mm  $\times$  250 mm), hexane/*i*-PrOH, 80:20 v/v, flow rate = 1 mL/min,  $\lambda$  = 254 nm, 25  $^\circ\text{C}$ .  $t_{\text{R}}$  (minor) = 17.48 min,  $t_{\text{R}}$  (major) = 27.19 min, ee > 99%.  $[\alpha]_{\text{D}}^{30}$  = +344.5 ( $c$  = 1.0,  $\text{CHCl}_3$ ).

## SUPPLEMENTARY INFORMATION

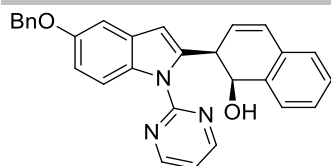

**cis-3ha**, 43.7 mg, 98% yield, pale yellow foam.  $^1\text{H NMR}$  (400 MHz,  $\text{CDCl}_3$ )  $\delta$  8.81 (d,  $J = 4.8$  Hz, 2H), 8.07 (d,  $J = 9.2$  Hz, 1H), 7.54-7.51 (m, 1H), 7.47-7.40 (m, 2H), 7.40-7.34 (m, 2H), 7.33-7.28 (m, 3H), 7.23-7.15 (m, 2H), 6.96-6.91 (m, 2H), 6.66 (dd,  $J = 9.6, 1.6$  Hz, 1H), 6.37 (s, 1H), 6.02 (dd,  $J = 9.6, 5.2$  Hz, 1H), 5.77 (br, 1H), 5.41 (d,  $J = 7.2$  Hz, 1H), 5.07 (s, 2H), 4.73-4.70 (m, 1H).  $^{13}\text{C NMR}$  (100 MHz,  $\text{CDCl}_3$ )  $\delta$  158.4, 157.3, 154.8, 137.6, 137.1, 136.4, 132.2, 132.1, 129.9, 129.0, 128.6, 128.3, 127.89, 127.86, 127.6, 127.5, 126.0, 125.9, 117.4, 115.0, 113.3, 109.3, 104.0, 70.7, 70.6, 38.9.

**IR** (thin film):  $\nu_{\text{max}}$  ( $\text{cm}^{-1}$ ) = 3031, 1613, 1564, 1425, 1338, 1177, 1120, 1078, 1015, 793, 748, 698, 664, 549, 522, 464.

**HRMS** (ESI) calcd for  $\text{C}_{29}\text{H}_{23}\text{O}_2\text{N}_3\text{Na}$   $[\text{M}+\text{Na}]^+$ : 468.1688. Found: 468.1684.

**HPLC** conditions: Chiralcel AD-H column (4.6 mm  $\times$  250 mm), hexane/*i*-PrOH, 80:20 v/v, flow rate = 1 mL/min,  $\lambda = 254$  nm, 25  $^\circ\text{C}$ .  $t_{\text{R}}$  (major) = 40.48 min,  $t_{\text{R}}$  (minor) = 64.22 min, ee = 99%.  $[\alpha]_{\text{D}}^{26} = +323.8$  ( $c = 1.0$ ,  $\text{CHCl}_3$ ).

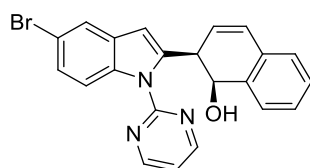

**cis-3ia**, 36.8 mg, 88% yield, pale yellow foam.  $^1\text{H NMR}$  (400 MHz,  $\text{CDCl}_3$ )  $\delta$  8.81 (d,  $J = 4.8$  Hz, 2H), 8.07 (d,  $J = 9.2$  Hz, 1H), 7.54-7.51 (m, 1H), 7.47-7.40 (m, 2H), 7.40-7.34 (m, 2H), 7.33-7.28 (m, 3H), 7.23-7.15 (m, 2H), 6.96-6.91 (m, 2H), 6.66 (dd,  $J = 9.6, 1.6$  Hz, 1H), 6.37 (s, 1H), 6.02 (dd,  $J = 9.6, 5.2$  Hz, 1H), 5.77 (br, 1H), 5.41 (d,  $J = 7.2$  Hz, 1H), 5.07 (s, 2H), 4.73-4.70 (m, 1H).  $^{13}\text{C NMR}$  (100 MHz,  $\text{CDCl}_3$ )  $\delta$  158.6, 157.1, 138.1, 136.2, 135.9, 132.0, 131.0, 128.55, 128.47, 128.2, 127.8, 126.1, 125.9, 125.9, 122.9, 118.0, 115.5, 115.4, 108.4, 70.7, 38.8. **IR** (thin film):  $\nu_{\text{max}}$  ( $\text{cm}^{-1}$ ) = 2922, 2852, 1564, 1420, 1334, 1261, 1190, 1075, 864, 791, 745, 701, 582.

**HRMS** (ESI) calcd for  $\text{C}_{22}\text{H}_{16}\text{ON}_3\text{BrNa}$   $[\text{M}+\text{Na}]^+$ : 440.0374. Found: 440.0376.

**HPLC** conditions: Chiralcel OD-H column (4.6 mm  $\times$  250 mm), hexane/*i*-PrOH, 80:20 v/v, flow rate = 1 mL/min,  $\lambda = 254$  nm, 25  $^\circ\text{C}$ .  $t_{\text{R}}$  (minor) = 12.56 min,  $t_{\text{R}}$  (major) = 16.61 min, ee = 99%.  $[\alpha]_{\text{D}}^{30} = +44.5$  ( $c = 1.0$ ,  $\text{CHCl}_3$ ).

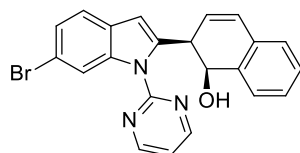

**cis-3ja**, 30.1 mg, 72% yield, pale yellow foam.  $^1\text{H NMR}$  (400 MHz,  $\text{CDCl}_3$ )  $\delta$  8.81 (d,  $J = 4.8$  Hz, 2H), 8.07 (d,  $J = 9.2$  Hz, 1H), 7.54-7.51 (m, 1H), 7.47-7.40 (m, 2H), 7.40-7.34 (m, 2H), 7.33-7.28 (m, 3H), 7.23-7.15 (m, 2H), 6.96-6.91 (m, 2H), 6.66 (dd,  $J = 9.6, 1.6$  Hz, 1H), 6.37 (s, 1H), 6.02 (dd,  $J = 9.6, 5.2$  Hz, 1H), 5.77 (br, 1H), 5.41 (d,  $J = 7.2$  Hz, 1H), 5.07 (s, 2H), 4.73-4.70 (m, 1H).  $^{13}\text{C NMR}$  (100 MHz,  $\text{CDCl}_3$ )  $\delta$  158.6, 157.0, 137.8, 137.5, 136.3, 132.0, 128.6, 128.4, 128.10, 128., 127.7, 126.1, 125.9, 125.5, 121.4, 118.0, 117.0, 116.8, 109.0, 70.6, 38.8.

**IR** (thin film):  $\nu_{\text{max}}$  ( $\text{cm}^{-1}$ ) = 2921, 1566, 1424, 1340, 1288, 1195, 1120, 1072, 1017 918, 905, 866, 791, 757, 702, 646, 588, 553, 462, 424.

**HRMS** (ESI) calcd for  $\text{C}_{22}\text{H}_{16}\text{ON}_3\text{BrNa}$   $[\text{M}+\text{Na}]^+$ : 440.0374. Found: 440.0372.

**HPLC** conditions: Chiralcel AD-H column (4.6 mm  $\times$  250 mm), hexane/*i*-PrOH, 80:20 v/v, flow rate = 1 mL/min,  $\lambda = 254$  nm, 25  $^\circ\text{C}$ .  $t_{\text{R}}$  (minor) = 17.77 min,  $t_{\text{R}}$  (major) = 28.72 min, ee = 99%.  $[\alpha]_{\text{D}}^{30} = +175.7$  ( $c = 1.0$ ,  $\text{CHCl}_3$ ).

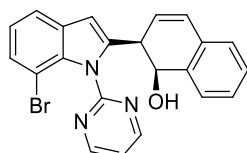

**cis-3ka**, 23.0 mg, 55% yield, pale yellow foam.  $^1\text{H NMR}$  (400 MHz,  $\text{CDCl}_3$ )  $\delta$  8.91 (d,  $J = 4.8$  Hz, 2H), 7.48-7.38 (m, 3H), 7.33 (d,  $J = 7.6$  Hz, 1H), 7.30-7.26 (m, 2H), 7.18-7.13 (m, 1H), 6.98 (t,  $J = 7.6$  Hz, 1H), 6.67 (d,  $J = 9.6$ , 1H), 6.43 (s, 1H), 5.95 (dd,  $J = 9.6, 5.2$  Hz, 1H), 5.22 (d,  $J = 6.8$ , 1H), 5.02 (br, 1H), 3.89-3.86 (m, 1H).  $^{13}\text{C NMR}$  (100 MHz,  $\text{CDCl}_3$ )  $\delta$  158.7, 157.2, 138.8, 135.92, 135.86, 132.0, 131.9, 128.8, 128.4, 127.8, 127.6, 127.2, 126.2, 122.7, 120.0, 106.3, 105.4, 70.2, 38.8.

**IR** (thin film):  $\nu_{\text{max}}$  ( $\text{cm}^{-1}$ ) = 2960, 2924, 2853, 1563, 1413, 1347, 1261, 1184, 1077, 1019, 796, 729, 701, 632.

**HRMS** (ESI) calcd for  $\text{C}_{22}\text{H}_{16}\text{ON}_3\text{BrNa}$   $[\text{M}+\text{Na}]^+$ : 440.0374. Found: 440.0374.

## SUPPLEMENTARY INFORMATION

**HPLC** conditions: Chiralcel AD–H column (4.6 mm × 250 mm), hexane/*i*-PrOH, 80:20 v/v, flow rate = 1 mL/min, λ = 254 nm, 25 °C. *t<sub>R</sub>* (minor) = 16.58 min, *t<sub>R</sub>* (major) = 26.06 min, ee = 83%.  $[\alpha]_D^{30} = +44.8$  (*c* = 1.0, CHCl<sub>3</sub>).

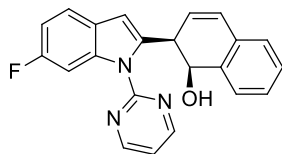

**cis-3la**, 31.8 mg, 89% yield, pale yellow foam. **<sup>1</sup>H NMR** (400 MHz, CDCl<sub>3</sub>) δ 8.85 (d, *J* = 4.8 Hz, 2H), 7.91 (dd, *J* = 10.8, 2.4 Hz, 1H), 7.53-7.50 (m, 1H), 7.36-7.25 (m, 4H), 7.23-7.16 (m, 1H), 6.91 (td, *J* = 8.8, 2.4 Hz, 1H), 6.66 (d, *J* = 9.6 Hz, 1H), 6.41 (s, 1H), 6.01 (dd, *J* = 9.6, 5.2 Hz, 1H), 5.61 (br, 1H), 5.39 (d, *J* = 7.2 Hz, 1H), 4.73-4.70 (m, 1H). **<sup>13</sup>C NMR** (100 MHz, CDCl<sub>3</sub>) δ 160.4 (d, *J* = 236.4 Hz), 158.4, 157.2, 137.2, 137.1-137.0 (m), 136.2, 131.9, 128.7, 128.3, 127.9, 127.6, 126.0, 125.9, 125.5 (d, *J* = 1.1 Hz), 120.8 (d, *J* = 9.9 Hz), 117.7, 110.5 (d, *J* = 24.1 Hz), 109.0, 101.2 (d, *J* = 28.5 Hz), 70.5, 38.8. **<sup>19</sup>F NMR** (376 MHz, CDCl<sub>3</sub>) δ -119.4.

**IR** (thin film):  $\nu_{\max}$  (cm<sup>-1</sup>) = 2924, 1566, 1482, 1422, 1351, 1261, 1196, 1136, 1078, 1015, 953, 908, 847, 785, 729, 701, 647, 608, 521, 462.

**HRMS** (ESI) calcd for C<sub>22</sub>H<sub>16</sub>ON<sub>3</sub>FNa [M+Na]<sup>+</sup>: 380.1175. Found: 380.1158.

**HPLC** conditions: Chiralcel AD–H column (4.6 mm × 250 mm), hexane/*i*-PrOH, 80:20 v/v, flow rate = 1 mL/min, λ = 254 nm, 25 °C. *t<sub>R</sub>* (minor) = 15.20 min, *t<sub>R</sub>* (major) = 22.55 min, ee > 99%.  $[\alpha]_D^{29} = +163.2$  (*c* = 1.0, CHCl<sub>3</sub>).

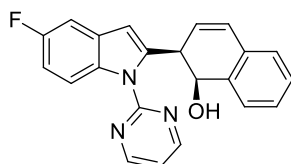

**cis-3ma**, 26.8 mg, 75% yield, pale yellow foam. **<sup>1</sup>H NMR** (400 MHz, CDCl<sub>3</sub>) δ 8.85 (d, *J* = 4.8 Hz, 2H), 8.07 (dd, *J* = 9.2, 4.8 Hz, 1H), 7.54-7.50 (m, 1H), 7.36-7.26 (m, 3H), 7.22-7.15 (m, 1H), 7.06 (dd, *J* = 8.8, 2.4 Hz, 1H), 6.93 (td, *J* = 9.2, 2.4 Hz, 1H), 6.67 (d, *J* = 9.6, 1H), 6.39 (s, 1H), 6.01 (dd, *J* = 9.6, 5.2 Hz, 1H), 5.68 (br, 1H), 5.41 (d, *J* = 7.2 Hz, 1H), 4.75-4.66 (m, 1H). **<sup>13</sup>C NMR** (100 MHz, CDCl<sub>3</sub>) δ 159.1 (d, *J* = 236.3 Hz), 158.5, 157.2, 138.4, 136.3, 133.6, 132.0, 130.1-129.9 (m), 128.6, 128.4, 128.1, 127.7, 126.1, 125.9, 117.8, 115.0 (d, *J* = 9.2 Hz), 111.0 (d, *J* = 25.0 Hz), 109.0 (d, *J* = 4.0 Hz), 105.5 (d, *J* = 23.4 Hz), 70.7, 38.9. **<sup>19</sup>F NMR** (376 MHz, CDCl<sub>3</sub>) δ -121.9.

**IR** (thin film):  $\nu_{\max}$  (cm<sup>-1</sup>) = 2904, 1567, 1471, 1449, 1427, 1349, 1290, 1179, 1116, 1069, 989, 954, 864, 827, 802, 769, 725, 694, 651, 633, 606, 588, 560, 526, 493, 478, 430.

**HRMS** (ESI) calcd for C<sub>22</sub>H<sub>16</sub>ON<sub>3</sub>FNa [M+Na]<sup>+</sup>: 380.1175. Found: 380.1178.

**HPLC** conditions: Chiralcel AD–H column (4.6 mm × 250 mm), hexane/*i*-PrOH, 80:20 v/v, flow rate = 1 mL/min, λ = 254 nm, 25 °C. *t<sub>R</sub>* (minor) = 20.30 min, *t<sub>R</sub>* (major) = 22.21 min, ee = 99%.  $[\alpha]_D^{28} = +157.0$  (*c* = 1.0, CHCl<sub>3</sub>).

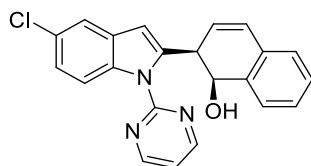

**cis-3na**, 28.0 mg, 75% yield, pale yellow foam. **<sup>1</sup>H NMR** (400 MHz, CDCl<sub>3</sub>) δ 8.88 (d, *J* = 4.8 Hz, 2H), 8.07 (d, *J* = 8.8 Hz, 1H), 7.53-7.51 (m, 1H), 7.40 (d, *J* = 2.0 Hz, 1H), 7.35-7.29 (m, 3H), 7.24-7.16 (m, 2H), 6.69 (d, *J* = 9.6 Hz, 1H), 6.39 (s, 1H), 6.03 (dd, *J* = 9.6, 5.2 Hz, 1H), 5.43 (d, *J* = 7.2 Hz, 1H), 4.73-4.69 (m, 1H). **<sup>13</sup>C NMR** (100 MHz, CDCl<sub>3</sub>) δ 158.6, 157.1, 138.2, 136.3, 135.5, 132.0, 130.4, 128.6, 128.5, 128.2, 127.7, 126.1, 125.9, 123.3, 119.8, 118.0, 115.1, 108.5, 70.7, 38.9.

**IR** (thin film):  $\nu_{\max}$  (cm<sup>-1</sup>) = 3021, 1563, 1421, 1335, 1193, 1069, 862, 792, 746, 701, 633, 589, 519.

**HRMS** (ESI) calcd for C<sub>22</sub>H<sub>16</sub>ON<sub>3</sub>ClNa [M+Na]<sup>+</sup>: 396.0880. Found: 396.0877.

**HPLC** conditions: Chiralcel AD–H column (4.6 mm × 250 mm), hexane/*i*-PrOH, 80:20 v/v, flow rate = 1 mL/min, λ = 254 nm, 25 °C. *t<sub>R</sub>* (minor) = 11.65 min, *t<sub>R</sub>* (major) = 15.26 min, ee = 97%.  $[\alpha]_D^{35} = +71.0$  (*c* = 1.0, CHCl<sub>3</sub>).

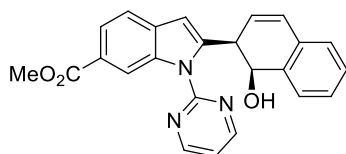

**cis-3oa**, 27.8 mg, 70% yield, pale yellow foam. **<sup>1</sup>H NMR** (400 MHz, CDCl<sub>3</sub>) δ 8.90 (d, *J* = 4.8 Hz, 2H), 8.77 (s, 1H), 7.84 (dd, *J* = 8.0, 1.6 Hz, 1H), 7.52-7.50 (m, 1H), 7.44 (d, *J* = 8.0 Hz, 1H), 7.33-7.28 (m, 3H), 7.22-7.15 (m, 1H), 6.67 (d, *J* = 9.6 Hz, 1H), 6.46 (s, 1H), 6.00 (dd, *J* = 9.6, 5.2 Hz, 1H), 5.70 (br, 1H), 5.43 (d, *J* = 7.2 Hz, 1H), 4.73-



## SUPPLEMENTARY INFORMATION

4.60 (m, 1H), 3.91 (s, 3H).  $^{13}\text{C NMR}$  (100 MHz,  $\text{CDCl}_3$ )  $\delta$  168.1, 158.8, 157.0, 140.3, 136.6, 136.2, 133.0, 131.9, 128.5, 128.4, 128.3, 127.7, 126.1, 125.9, 124.8, 123.4, 120.0, 118.3, 115.9, 108.9, 70.7, 52.1, 38.9.

**IR** (thin film):  $\nu_{\text{max}}$  ( $\text{cm}^{-1}$ ) = 2945, 1711, 1567, 1537, 1477, 1430, 1355, 1306, 1286, 1240, 1201, 1118, 1095, 982, 906, 854, 796, 763, 739, 706, 683, 657, 632, 559, 516, 461.

**HRMS** (ESI) calcd for  $\text{C}_{24}\text{H}_{19}\text{O}_3\text{N}_3\text{Na}$   $[\text{M}+\text{Na}]^+$ : 420.1324. Found: 420.1326.

**HPLC** conditions: Chiralcel AD-H column (4.6 mm  $\times$  250 mm), hexane/*i*-PrOH, 80:20 v/v, flow rate = 1 mL/min,  $\lambda$  = 254 nm, 25 °C.  $t_{\text{R}}$  (minor) = 25.44 min,  $t_{\text{R}}$  (major) = 37.96 min, ee > 99%.  $[\alpha]_{\text{D}}^{30}$  = +352.7 ( $c$  = 1.0,  $\text{CHCl}_3$ ).

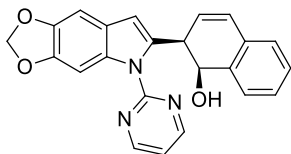

*cis*-**3pa**, 35.7 mg, 93% yield, pale yellow foam.  $^1\text{H NMR}$  (400 MHz,  $\text{CDCl}_3$ )  $\delta$  8.83 (d,  $J$  = 4.8 Hz, 2H), 7.69 (s, 1H), 7.54-7.50 (m, 1H), 7.31-7.27 (m, 2H), 7.25-7.22 (m, 1H), 7.20-7.16 (m, 1H), 6.79 (s, 1H), 6.63 (d,  $J$  = 9.6 Hz, 1H), 6.30 (s, 1H), 5.99 (dd,  $J$  = 9.6, 5.2 Hz, 1H), 5.91 (dd,  $J$  = 9.6, 1.6 Hz, 2H), 5.76 (br, 1H), 5.37 (d,  $J$  = 7.2 Hz, 1H), 4.67-4.63 (m, 1H).  $^{13}\text{C NMR}$  (100 MHz,  $\text{CDCl}_3$ )  $\delta$  158.4, 157.3, 145.4, 144.2, 136.4, 134.9, 132.1, 132.0, 129.0, 128.3, 127.8, 127.6, 126.0, 125.9, 123.4, 117.6, 109.5, 100.9, 99.1, 95.8, 70.7, 38.8.

**IR** (thin film):  $\nu_{\text{max}}$  ( $\text{cm}^{-1}$ ) = 2892, 1565, 1460, 1424, 1343, 1283, 1190, 1160, 1082, 1036, 941, 849, 789, 729, 700, 643, 522.

**HRMS** (ESI) calcd for  $\text{C}_{23}\text{H}_{17}\text{O}_3\text{N}_3\text{Na}$   $[\text{M}+\text{Na}]^+$ : 406.1168. Found: 406.1168.

**HPLC** conditions: Chiralcel AD-H column (4.6 mm  $\times$  250 mm), hexane/*i*-PrOH, 80:20 v/v, flow rate 1 mL/min,  $\lambda$  = 254 nm, 25 °C.  $t_{\text{R}}$  (major) = 39.44 min,  $t_{\text{R}}$  (minor) = 43.05 min, ee = 96%.  $[\alpha]_{\text{D}}^{30}$  = +214.8 ( $c$  = 1.0,  $\text{CHCl}_3$ ).

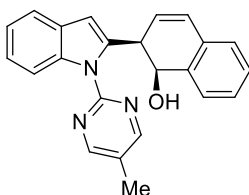

*cis*-**3qa**, 20.5 mg, 58% yield, pale yellow foam.  $^1\text{H NMR}$  (400 MHz,  $\text{CDCl}_3$ )  $\delta$  8.68 (s, 2H), 8.02 (d,  $J$  = 8.4 Hz, 1H), 7.54-7.49 (m, 1H), 7.42 (d,  $J$  = 7.6 Hz, 1H), 7.31-7.28 (m, 2H), 7.23-7.16 (m, 2H), 7.16-7.08 (m, 1H), 6.65 (d,  $J$  = 9.6 Hz, 1H), 6.41 (s, 1H), 6.01 (dd,  $J$  = 9.6, 5.2 Hz, 1H), 5.88 (br, 1H), 5.39 (d,  $J$  = 7.2 Hz, 1H), 4.63-4.59 (m, 1H), 2.40 (s, 3H).  $^{13}\text{C NMR}$  (100 MHz,  $\text{CDCl}_3$ )  $\delta$  158.5, 155.4, 137.2, 136.5, 136.3, 132.1, 129.1, 128.9, 128.3, 127.9, 127.6, 127.4, 126.0, 125.9, 123.0, 122.0, 120.4, 113.4, 108.5, 70.7, 38.7, 15.3.

**IR** (thin film):  $\nu_{\text{max}}$  ( $\text{cm}^{-1}$ ) = 2921, 2779, 1589, 1561, 1436, 1347, 1299, 1198, 1114, 1081, 1016, 786, 735, 701, 662, 608, 548, 522, 465.

**HRMS** (ESI) calcd for  $\text{C}_{23}\text{H}_{19}\text{ON}_3\text{Na}$   $[\text{M}+\text{Na}]^+$ : 376.1426. Found: 376.1425.

**HPLC** conditions: Chiralcel AD-H column (4.6 mm  $\times$  250 mm), hexane/*i*-PrOH, 80:20 v/v, flow rate = 1 mL/min,  $\lambda$  = 254 nm, 25 °C.  $t_{\text{R}}$  (major) = 23.19 min,  $t_{\text{R}}$  (minor) = 24.22 min, ee > 99%.  $[\alpha]_{\text{D}}^{31}$  = +213.2 ( $c$  = 1.0,  $\text{CHCl}_3$ ).

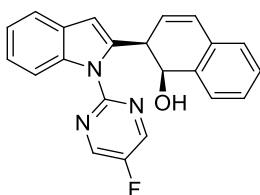

*cis*-**3ra**, 31.1 mg, 87% yield, pale yellow foam.  $^1\text{H NMR}$  (400 MHz,  $\text{CDCl}_3$ )  $\delta$  8.70 (s, 2H), 8.03 (d,  $J$  = 8.4 Hz, 1H), 7.46 (d,  $J$  = 7.6 Hz, 2H), 7.34-7.27 (m, 2H), 7.25-7.13 (m, 3H), 6.67 (dd,  $J$  = 9.6, 1.6 Hz, 1H), 6.51 (s, 1H), 6.05 (dd,  $J$  = 9.6, 4.8 Hz, 1H), 5.26 (d,  $J$  = 6.8 Hz, 1H), 4.72-4.69 (m, 1H), 4.36 (br, 1H).  $^{13}\text{C NMR}$  (100 MHz,  $\text{CDCl}_3$ )  $\delta$  156.4, 153.8, 153.7 (d,  $J$  = 3.3 Hz), 146.3 (d,  $J$  = 21.8 Hz), 137.2, 136.5 (d,  $J$  = 81.7 Hz), 132.1, 129.0, 128.8, 128.3, 128.0, 127.98, 126.4, 126.3, 123.3, 122.3, 120.5, 113.4, 108.8, 70.4, 39.2.  $^{19}\text{F NMR}$  (376 MHz,  $\text{CDCl}_3$ )  $\delta$  -142.0.

**IR** (thin film):  $\nu_{\text{max}}$  ( $\text{cm}^{-1}$ ) = 2919, 1568, 1550, 1436, 1347, 1291, 1245, 1195, 1078, 1015, 922, 793, 742, 703, 676, 640, 603, 586, 549, 520, 468, 432.

**HRMS** (ESI) calcd for  $\text{C}_{22}\text{H}_{16}\text{ON}_3\text{FNa}$   $[\text{M}+\text{Na}]^+$ : 380.1175. Found: 380.1179.

**HPLC** conditions: Chiralcel AD-H column (4.6 mm  $\times$  250 mm), hexane/*i*-PrOH, 80:20 v/v, flow rate = 1 mL/min,  $\lambda$  = 254 nm, 25 °C.  $t_{\text{R}}$  (minor) = 16.12 min,  $t_{\text{R}}$  (major) = 22.41 min, ee = 90%.  $[\alpha]_{\text{D}}^{30}$  = +141.2 ( $c$  = 1.0,  $\text{CHCl}_3$ ).

## SUPPLEMENTARY INFORMATION

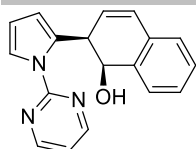

*cis*-**3sa**, 19.1 mg, 66% yield, pale yellow oil.  $^1\text{H NMR}$  (400 MHz,  $\text{CDCl}_3$ )  $\delta$  8.70 (d,  $J = 4.8$  Hz, 2H), 7.70-7.69 (m, 1H), 7.48-7.45 (m, 1H), 7.30-7.26 (m, 2H), 7.18-7.15 (m, 2H), 6.63 (dd,  $J = 9.6, 1.6$  Hz, 1H), 6.20 (t,  $J = 3.2$  Hz, 1H), 6.14-6.13 (m, 1H), 6.03 (dd,  $J = 9.6, 4.8$  Hz, 1H), 5.25 (d,  $J = 6.4$  Hz, 1H), 4.98-4.89 (m, 1H), 4.68 (br, 1H).  $^{13}\text{C NMR}$  (100 MHz,  $\text{CDCl}_3$ )  $\delta$  158.4, 157.3, 136.4, 132.3, 130.2, 129.6, 128.0, 127.8, 127.5, 126.5, 126.1, 122.6, 117.7, 114.9, 110.7, 70.6, 39.2.

**IR** (thin film):  $\nu_{\text{max}}$  ( $\text{cm}^{-1}$ ) = 3365, 2906, 1575, 1484, 1447, 1406, 1280, 1193, 1144, 1119, 1072, 995, 941, 916, 880, 815, 799, 763, 724, 684, 640, 598, 537, 515, 494, 423.

**HRMS** (ESI) calcd for  $\text{C}_{18}\text{H}_{15}\text{ON}_3\text{Na}$  [ $\text{M}+\text{Na}$ ] $^+$ : 312.1113. Found: 312.1114.

**HPLC** conditions: Chiralcel OD-H column (4.6 mm  $\times$  250 mm), hexane/*i*-PrOH, 85:15 v/v, flow rate = 1 mL/min,  $\lambda = 254$  nm, 25  $^\circ\text{C}$ .  $t_{\text{R}}$  (minor) = 8.91 min,  $t_{\text{R}}$  (major) = 13.93 min, ee = 72%.  $[\alpha]_{\text{D}}^{31} = -9.7$  ( $c = 1.0$ ,  $\text{CHCl}_3$ ).

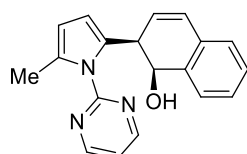

*cis*-**3ta**, 17.3 mg, 57% yield, pale yellow oil.  $^1\text{H NMR}$  (400 MHz,  $\text{CDCl}_3$ )  $\delta$  8.83 (d,  $J = 4.8$  Hz, 2H), 7.51-7.48 (m, 1H), 7.30 (t,  $J = 4.8$  Hz, 1H), 7.26-7.21 (m, 2H), 7.14-7.08 (m, 1H), 6.55 (d,  $J = 9.6$  Hz, 1H), 5.93-5.89 (m, 3H), 5.46 (br, 1H), 5.15 (d,  $J = 7.2$  Hz, 1H), 4.18-4.15 (m, 1H), 2.31 (s, 3H).  $^{13}\text{C NMR}$  (100 MHz,  $\text{CDCl}_3$ )  $\delta$  158.4, 157.3, 136.6, 132.3, 131.4, 129.3, 128.9, 128.0, 127.5, 127.4, 126.1, 125.9, 118.6, 111.4, 110.2, 70.7, 38.7, 14.8.

**IR** (thin film):  $\nu_{\text{max}}$  ( $\text{cm}^{-1}$ ) = 2922, 1561, 1423, 1264, 1219, 1077, 1021, 814, 768, 698, 639, 616, 543, 519.

**HRMS** (ESI) calcd for  $\text{C}_{19}\text{H}_{17}\text{ON}_3\text{Na}$  [ $\text{M}+\text{Na}$ ] $^+$ : 326.1269. Found: 326.1266.

**HPLC** conditions: Chiralcel OD-H column (4.6 mm  $\times$  250 mm), hexane/*i*-PrOH, 85:15 v/v, flow rate = 1 mL/min,  $\lambda = 254$  nm, 25  $^\circ\text{C}$ .  $t_{\text{R}}$  (minor) = 10.89 min,  $t_{\text{R}}$  (major) = 14.36 min, ee = 81%.  $[\alpha]_{\text{D}}^{35} = -42.8$  ( $c = 1.0$ ,  $\text{CHCl}_3$ ).

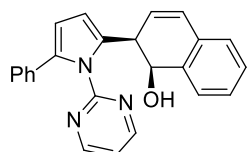

*cis*-**3ua**, 34.7 mg, 95% yield, pale yellow foam.  $^1\text{H NMR}$  (400 MHz,  $\text{CDCl}_3$ )  $\delta$  8.72 (d,  $J = 4.8$  Hz, 2H), 7.52-7.50 (m, 1H), 7.30-7.23 (m, 3H), 7.21-7.10 (m, 4H), 7.03-6.95 (m, 2H), 6.61 (d,  $J = 9.6$  Hz, 1H), 6.30 (d,  $J = 3.6$  Hz, 1H), 6.08 (d,  $J = 3.6$  Hz, 1H), 5.94 (dd,  $J = 9.6, 5.2$  Hz, 1H), 5.24 (br, 1H), 5.17 (d,  $J = 7.2$  Hz, 1H), 4.10-4.07 (m, 1H).  $^{13}\text{C NMR}$  (100 MHz,  $\text{CDCl}_3$ )  $\delta$  158.5, 157.7, 136.4, 136.1, 133.8, 132.2, 131.6, 128.6, 128.20, 128.17, 127.9, 127.6, 126.3, 126.1, 126.0, 119.2, 111.9, 111.8, 70.6, 38.7.

**IR** (thin film):  $\nu_{\text{max}}$  ( $\text{cm}^{-1}$ ) = 2784, 1571, 1447, 1423, 1319, 1281, 1229, 1188, 1120, 1084, 1027, 965, 906, 812, 792, 775, 750, 696, 642, 604, 549, 524, 463.

**HRMS** (ESI) calcd for  $\text{C}_{24}\text{H}_{19}\text{ON}_3\text{Na}$  [ $\text{M}+\text{Na}$ ] $^+$ : 388.1426. Found: 388.1425.

**HPLC** conditions: Chiralcel AD-H column (4.6 mm  $\times$  250 mm), hexane/*i*-PrOH, 80:20 v/v, flow rate = 1 mL/min,  $\lambda = 254$  nm, 25  $^\circ\text{C}$ .  $t_{\text{R}}$  (minor) = 17.05 min,  $t_{\text{R}}$  (major) = 23.14 min, ee = 69%.  $[\alpha]_{\text{D}}^{34} = -61.3$  ( $c = 1.0$ ,  $\text{CHCl}_3$ ).

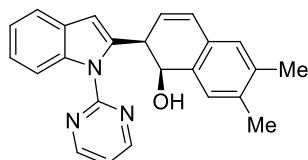

*cis*-**3ab**, 30.0 mg, 81% yield, pale yellow foam.  $^1\text{H NMR}$  (400 MHz,  $\text{CDCl}_3$ )  $\delta$  8.85 (d,  $J = 4.8$  Hz, 2H), 8.12 (d,  $J = 8.4$  Hz, 1H), 7.45 (d,  $J = 7.6$  Hz, 1H), 7.28 (s, 1H), 7.24 (d,  $J = 5.2$  Hz, 1H), 7.22-7.18 (m, 1H), 7.17-7.13 (m, 1H), 6.98 (s, 1H), 6.61 (d,  $J = 9.6$  Hz, 1H), 6.50 (s, 1H), 5.96 (dd,  $J = 9.6, 5.2$  Hz, 1H), 5.45 (br, 1H), 5.32 (d,  $J = 7.2$  Hz, 1H), 4.70-4.67 (m, 1H), 2.29 (s, 3H), 2.26 (s, 3H).  $^{13}\text{C NMR}$  (100 MHz,  $\text{CDCl}_3$ )  $\delta$  158.5, 157.4, 153.3, 137.2, 137.1, 136.7, 135.7, 133.7, 129.7, 129.3, 127.9, 127.8, 127.6, 123.2, 122.2, 120.4, 117.6, 113.8, 109.2, 70.5, 39.2, 19.9, 19.6.

**IR** (thin film):  $\nu_{\text{max}}$  ( $\text{cm}^{-1}$ ) = 2916, 1562, 1500, 1451, 1420, 1345, 1258, 1215, 1019, 881, 798, 743, 703, 618, 480, 425.

**HRMS** (ESI) calcd for  $\text{C}_{24}\text{H}_{21}\text{ON}_3\text{Na}$  [ $\text{M}+\text{Na}$ ] $^+$ : 390.1582. Found: 390.1578.

## SUPPLEMENTARY INFORMATION

**HPLC** conditions: Chiralcel AD–H column (4.6 mm × 250 mm), hexane/*i*-PrOH, 80:20 v/v, flow rate = 1 mL/min,  $\lambda$  = 254 nm, 25 °C.  $t_R$  (minor) = 16.07 min,  $t_R$  (major) = 18.63 min, ee = 94%.  $[\alpha]_D^{30}$  = +163.8 ( $c$  = 1.0, CHCl<sub>3</sub>).

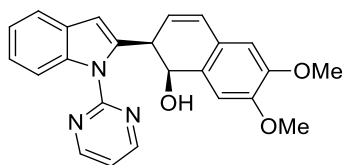

**cis-3ac**, 14.0 mg, 35% yield, pale yellow foam. **<sup>1</sup>H NMR** (400 MHz, CDCl<sub>3</sub>)  $\delta$  8.86 (d,  $J$  = 4.8 Hz, 2H), 8.11 (d,  $J$  = 8.4 Hz, 1H), 7.44 (d,  $J$  = 7.6 Hz, 1H), 7.30-7.25 (m, 1H), 7.23-7.19 (m, 1H), 7.15 (t,  $J$  = 7.6 Hz, 1H), 7.10 (s, 1H), 6.75 (s, 1H), 6.56 (d,  $J$  = 9.6 Hz, 1H), 6.46 (s, 1H), 5.92 (dd,  $J$  = 9.6, 5.2 Hz, 1H), 5.88 (br, 1H), 5.36 (d,  $J$  = 7.2 Hz, 1H), 4.65-4.57 (m, 1H), 3.94 (s, 3H), 3.88 (s, 3H). **<sup>13</sup>C NMR** (100 MHz, CDCl<sub>3</sub>)  $\delta$  158.5, 157.3, 149.0, 148.0, 137.2, 136.7, 129.6, 129.3, 127.4, 127.1, 124.8, 123.2, 122.3, 120.4, 117.7, 113.8, 109.7, 109.6, 109.3, 70.7, 56.2, 56.0, 38.7.

**IR** (thin film):  $\nu_{max}$  (cm<sup>-1</sup>) = 2926, 1562, 1505, 1452, 1417, 1345, 1303, 1243, 1197, 1161, 1127, 1005, 889, 855, 828, 796, 744, 629, 478.

**HRMS** (ESI) calcd for C<sub>24</sub>H<sub>21</sub>O<sub>3</sub>N<sub>3</sub>Na [M+Na]<sup>+</sup>: 422.1481. Found: 422.1482.

**HPLC** conditions: Chiralcel OD–H column (4.6 mm × 250 mm), hexane/*i*-PrOH, 80:20 v/v, flow rate = 1 mL/min,  $\lambda$  = 254 nm, 25 °C.  $t_R$  (minor) = 26.45 min,  $t_R$  (major) = 41.80 min, ee = 95%.  $[\alpha]_D^{30}$  = +14.9 ( $c$  = 1.0, CHCl<sub>3</sub>).

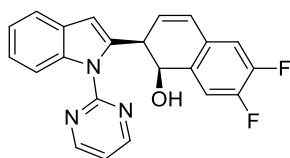

**cis-3ad**, 28.2 mg, 75% yield, pale yellow foam. **<sup>1</sup>H NMR** (400 MHz, CDCl<sub>3</sub>)  $\delta$  8.88 (d,  $J$  = 4.8 Hz, 2H), 8.10 (d,  $J$  = 8.4 Hz, 1H), 7.43 (d,  $J$  = 7.8 Hz, 1H), 7.37-7.32 (m, 1H), 7.29 (t,  $J$  = 4.8 Hz, 1H), 7.24-7.19 (m, 1H), 7.18-7.12 (m, 1H), 6.99 (dd,  $J$  = 10.8, 7.6 Hz, 1H), 6.55 (d,  $J$  = 9.6 Hz, 1H), 6.37-6.36 (m, 2H), 6.03 (dd,  $J$  = 9.6, 5.6 Hz, 1H), 5.37 (d,  $J$  = 7.6 Hz, 1H), 4.61-4.57 (m, 1H). **<sup>13</sup>C NMR** (100 MHz, CDCl<sub>3</sub>)  $\delta$  158.6, 157.1, 150.29 (dd,  $J$  = 248.3, 12.7 Hz), 149.64 (dd,  $J$  = 246.0, 13.2 Hz), 137.2, 135.2, 133.6 (dd,  $J$  = 5.5, 3.5 Hz), 129.7 (d,  $J$  = 2.6 Hz), 129.1, 128.8 (dd,  $J$  = 6.4, 3.9 Hz), 126.4-126.2 (m), 123.4, 122.5, 120.5, 117.8, 115.5 (d,  $J$  = 18.9 Hz), 114.6 (d,  $J$  = 18.0 Hz), 113.9, 109.5, 70.2, 37.8. **<sup>19</sup>F NMR** (376 MHz, CDCl<sub>3</sub>)  $\delta$  -138.6, -141.2.

**IR** (thin film):  $\nu_{max}$  (cm<sup>-1</sup>) = 2923, 1564, 1505, 1452, 1427, 1349, 1311, 1261, 1200, 1149, 1104, 1081, 907, 879, 798, 725, 640, 593, 551, 437.

**HRMS** (ESI) calcd for C<sub>22</sub>H<sub>15</sub>ON<sub>3</sub>F<sub>2</sub>Na [M+Na]<sup>+</sup>: 398.1081. Found: 398.1084.

**HPLC** conditions: Chiralcel AD–H column (4.6 mm × 250 mm), hexane/*i*-PrOH, 85:15 v/v, flow rate = 1 mL/min,  $\lambda$  = 254 nm, 25 °C.  $t_R$  (major) = 16.95 min,  $t_R$  (minor) = 18.19 min, ee = 99%.  $[\alpha]_D^{35}$  = +286.1 ( $c$  = 1.0, CHCl<sub>3</sub>).

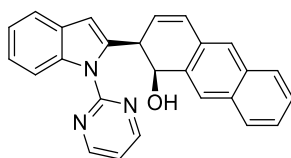

**cis-3ae**, 19.5 mg, 50% yield, pale yellow foam. **<sup>1</sup>H NMR** (400 MHz, CDCl<sub>3</sub>)  $\delta$  8.91 (d,  $J$  = 4.8 Hz, 2H), 8.09 (d,  $J$  = 8.4 Hz, 1H), 7.96 (s, 1H), 7.84 (d,  $J$  = 7.6 Hz, 1H), 7.79 (d,  $J$  = 7.6 Hz, 1H), 7.63 (s, 1H), 7.48-7.39 (m, 2H), 7.37-7.27 (m, 2H), 7.20-7.16 (m, 1H), 7.09 (td,  $J$  = 7.6, 1.2 Hz, 1H), 6.84 (d,  $J$  = 9.6 Hz, 1H), 6.34 (br, 1H), 6.30 (s, 1H), 6.11 (dd,  $J$  = 9.6, 6.0 Hz, 1H), 5.58 (d,  $J$  = 7.2 Hz, 1H), 4.81-4.65 (m, 1H). **<sup>13</sup>C NMR** (100 MHz, CDCl<sub>3</sub>)  $\delta$  158.6, 157.3, 137.2, 136.2, 135.1, 133.9, 133.2, 131.0, 129.6, 129.2, 128.3, 128.2, 127.8, 126.0, 125.9, 124.7, 124.6, 123.2, 122.3, 120.5, 117.7, 113.8, 109.4, 71.2, 38.8.

**IR** (thin film):  $\nu_{max}$  (cm<sup>-1</sup>) = 2920, 2851, 1665, 1563, 1452, 1424, 1346, 1261, 1198, 1150, 1081, 886, 800, 742, 696, 637, 616, 477, 433.

**HRMS** (ESI) calcd for C<sub>26</sub>H<sub>19</sub>ON<sub>3</sub>Na [M+Na]<sup>+</sup>: 412.1426. Found: 412.1421.

**HPLC** conditions: Chiralcel AD–H column (4.6 mm × 250 mm), hexane/*i*-PrOH, 80:20 v/v, flow rate = 1 mL/min,  $\lambda$  = 254 nm, 25 °C.  $t_R$  (minor) = 27.05 min,  $t_R$  (major) = 31.74 min, ee = 99%.  $[\alpha]_D^{31}$  = +24.3 ( $c$  = 1.0, CHCl<sub>3</sub>).

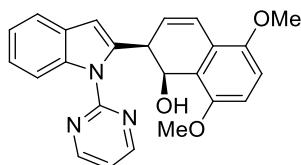

## SUPPLEMENTARY INFORMATION

*cis*-**3af**, 26.8 mg, 67% yield, pale yellow foam. <sup>1</sup>H NMR (400 MHz, CDCl<sub>3</sub>) δ 8.76 (d, *J* = 4.8 Hz, 2H), 8.28 (d, *J* = 8.0 Hz, 1H), 7.61 (d, *J* = 7.6 Hz, 1H), 7.31-7.26 (m, 1H), 7.22 (td, *J* = 7.2, 1.2 Hz, 1H), 7.16 (t, *J* = 4.8 Hz, 1H), 7.01 (dd, *J* = 10.0, 3.2 Hz, 1H), 6.90 (s, 1H), 6.85-6.76 (m, 2H), 6.07 (dt, *J* = 10.0, 2.0 Hz, 1H), 5.37 (d, *J* = 4.8 Hz, 1H), 4.95 (dt, *J* = 5.2, 2.8 Hz, 1H), 3.83 (s, 3H), 3.80 (s, 3H). <sup>13</sup>C NMR (100 MHz, CDCl<sub>3</sub>) δ 158.4, 158.1, 151.2, 149.8, 139.5, 137.4, 129.2, 129.0, 125.0, 123.3, 122.5, 122.2, 121.2, 120.3, 117.5, 114.1, 111.4, 111.3, 109.0, 62.7, 56.6, 56.4, 41.5.

IR (thin film):  $\nu_{\max}$  (cm<sup>-1</sup>) = 2934, 1563, 1481, 1452, 1421, 1345, 1257, 1188, 1084, 956, 855, 798, 745, 664.

HRMS (ESI) calcd for C<sub>24</sub>H<sub>21</sub>O<sub>3</sub>N<sub>3</sub>Na [M+Na]<sup>+</sup>: 422.1481. Found: 422.1480.

HPLC conditions: Chiralcel OD-H column (4.6 mm × 250 mm), hexane/*i*-PrOH, 80:20 v/v, flow rate 1 mL/min, λ = 254 nm, 25 °C. *t*<sub>R</sub> (minor) = 26.79 min, *t*<sub>R</sub> (major) = 49.94 min, ee > 99%. [α]<sub>D</sub><sup>31</sup> = -112.4 (c = 1.0, CHCl<sub>3</sub>).

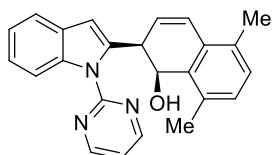

*cis*-**3ag**, 26.8 mg, 73% yield, pale yellow foam. <sup>1</sup>H NMR (400 MHz, CDCl<sub>3</sub>) δ 8.77 (d, *J* = 4.8 Hz, 2H), 8.29 (d, *J* = 8.0 Hz, 1H), 7.67-7.56 (m, 1H), 7.33-7.27 (m, 1H), 7.25-7.22 (m, 1H), 7.17 (td, *J* = 4.8, 1.2 Hz, 1H), 7.09-6.99 (m, 2H), 6.91-6.87 (m, 2H), 6.12 (dt, *J* = 10.0, 2.0 Hz, 1H), 5.26-5.24 (m, 1H), 4.93-4.91 (m, 1H), 2.37 (s, 3H), 2.35 (s, 3H). <sup>13</sup>C NMR (100 MHz, CDCl<sub>3</sub>) δ 158.4, 158.2, 139.7, 137.3, 134.0, 133.7, 131.9, 130.4, 130.2, 129.8, 129.2, 129.0, 124.7, 123.4, 122.3, 120.3, 117.5, 114.2, 108.8, 65.6, 41.7, 19.2, 18.5.

IR (thin film):  $\nu_{\max}$  (cm<sup>-1</sup>) = 2922, 1562, 1452, 1421, 1345, 1259, 1193, 1077, 995, 907, 859, 805, 728, 679, 641, 449.

HRMS (ESI) calcd for C<sub>24</sub>H<sub>21</sub>ON<sub>3</sub>Na [M+Na]<sup>+</sup>: 390.1582. Found: 390.1582.

HPLC conditions: Chiralcel OD-H column (4.6 mm × 250 mm), hexane/*i*-PrOH, 85:15 v/v, flow rate = 1 mL/min, λ = 254 nm, 25 °C. *t*<sub>R</sub> (minor) = 9.88 min, *t*<sub>R</sub> (major) = 23.49 min, ee = 98%. [α]<sub>D</sub><sup>31</sup> = -94.5 (c = 1.0, CHCl<sub>3</sub>).

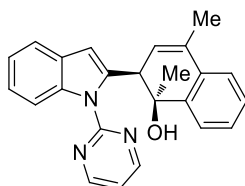

*cis*-**3ah**, 22.8 mg, 62% yield, pale yellow foam. <sup>1</sup>H NMR (400 MHz, CDCl<sub>3</sub>) δ 8.77 (d, *J* = 4.8 Hz, 2H), 8.12-8.10 (m, 1H), 7.86 (dd, *J* = 7.6, 1.2 Hz, 1H), 7.63-7.61 (m, 1H), 7.35 (td, *J* = 7.6, 1.2 Hz, 1H), 7.32-7.26 (m, 2H), 7.26-7.21 (m, 2H), 7.19 (t, *J* = 4.8 Hz, 1H), 6.81 (s, 1H), 6.32 (s, 1H), 5.89 (dd, *J* = 2.4, 1.6 Hz, 1H), 4.89 (t, *J* = 2.4 Hz, 1H), 2.10 (dd, *J* = 2.4, 1.6 Hz, 3H), 1.42 (s, 3H). <sup>13</sup>C NMR (100 MHz, CDCl<sub>3</sub>) δ 158.3, 157.2, 146.0, 140.5, 136.7, 133.7, 132.9, 129.6, 129.4, 128.2, 127.0, 124.0, 123.14, 123.10, 122.4, 120.2, 117.6, 114.0, 109.0, 75.5, 44.4, 24.1, 19.0.

IR (thin film):  $\nu_{\max}$  (cm<sup>-1</sup>) = 3268, 2925, 1565, 1430, 1350, 1293, 1263, 1202, 1159, 1087, 1035, 958, 860, 802, 759, 746, 719, 666, 630, 579, 560, 538, 464, 442.

HRMS (ESI) calcd for C<sub>24</sub>H<sub>21</sub>ON<sub>3</sub>Na [M+Na]<sup>+</sup>: 390.1582. Found: 390.1583.

HPLC conditions: Chiralcel AD-H column (4.6 mm × 250 mm), hexane/*i*-PrOH, 90:10 v/v, flow rate = 1 mL/min, λ = 254 nm, 25 °C. *t*<sub>R</sub> (major) = 10.18 min, *t*<sub>R</sub> (minor) = 14.50 min, ee = 52%. [α]<sub>D</sub><sup>31</sup> = -6.5 (c = 1.0, CHCl<sub>3</sub>).

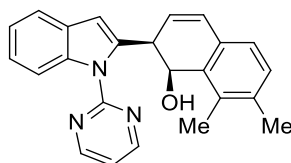

*cis*-**3ai**, 16.0 mg, 43% yield, pale yellow foam. <sup>1</sup>H NMR (400 MHz, CDCl<sub>3</sub>) δ 8.77 (d, *J* = 4.8 Hz, 2H), 8.28 (d, *J* = 8.0 Hz, 1H), 7.63-7.61 (m, 1H), 7.31-7.26 (m, 1H), 7.25-7.21 (m, 1H), 7.18 (t, *J* = 4.8 Hz, 1H), 7.13 (d, *J* = 7.6 Hz, 1H), 6.97 (d, *J* = 7.6 Hz, 1H), 6.89 (s, 1H), 6.63 (dd, *J* = 9.6, 3.2 Hz, 1H), 5.99 (dt, *J* = 9.6, 1.6 Hz, 1H), 5.33 (d, *J* = 4.4 Hz, 1H), 4.93-4.87 (m, 1H), 2.32 (s, 3H), 2.30 (s, 3H). <sup>13</sup>C NMR (100 MHz, CDCl<sub>3</sub>) δ 158.4, 158.1, 139.8, 137.4, 137.0, 135.2, 133.6, 130.2, 130.0, 129.2, 128.1, 127.6, 124.7, 123.4, 122.3, 120.3, 117.6, 114.2, 108.9, 65.6, 42.2, 20.9, 14.4.

IR (thin film):  $\nu_{\max}$  (cm<sup>-1</sup>) = 2962, 1564, 1452, 1425, 1346, 1259, 1015, 790, 739, 593.

HRMS (ESI) calcd for C<sub>24</sub>H<sub>21</sub>ON<sub>3</sub>Na [M+Na]<sup>+</sup>: 390.1582. Found: 390.1579.

HPLC conditions: Chiralcel AD-H column (4.6 mm × 250 mm), hexane/*i*-PrOH, 80:20 v/v, flow rate = 1 mL/min, λ = 254 nm, 25 °C. *t*<sub>R</sub> (minor) = 25.23 min, *t*<sub>R</sub> (major) = 36.13 min, ee = 97%. [α]<sub>D</sub><sup>35</sup> = -259.9 (c = 1.0, CHCl<sub>3</sub>).

## SUPPLEMENTARY INFORMATION

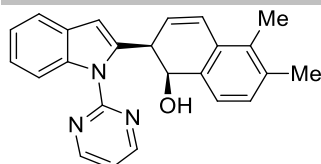

*cis*-**3ai**, 11.8 mg, 32% yield, pale yellow foam. <sup>1</sup>H NMR (400 MHz, CDCl<sub>3</sub>) δ 8.85 (d, *J* = 4.8 Hz, 2H), 8.14 (d, *J* = 8.4 Hz, 1H), 7.45 (d, *J* = 7.6 Hz, 1H), 7.25-7.23 (m, 2H), 7.22-7.18 (m, 1H), 7.18-7.12 (m, 1H), 7.10 (d, *J* = 7.6 Hz, 1H), 6.98 (dd, *J* = 10.0, 1.6 Hz, 1H), 6.49 (s, 1H), 6.09 (dd, *J* = 10.0, 4.8 Hz, 1H), 5.25 (d, *J* = 6.8 Hz, 1H), 5.11 (br, 1H), 4.70 (ddd, *J* = 6.8, 4.8, 1.6 Hz, 1H), 2.35 (s, 3H), 2.33 (s, 3H). <sup>13</sup>C NMR (100 MHz, CDCl<sub>3</sub>) δ 158.5, 157.5, 137.1, 136.2, 134.3, 132.1, 130.1, 129.5, 129.3, 129.0, 125.1, 123.7, 123.2, 122.3, 120.4, 117.6, 113.9, 109.1, 103.5, 71.1, 38.8, 20.8, 14.8.

IR (thin film):  $\nu_{\max}$  (cm<sup>-1</sup>) = 2962, 1565, 1452, 1427, 1347, 1301, 1259, 1014, 792, 749, 703.

HRMS (ESI) calcd for C<sub>24</sub>H<sub>21</sub>ON<sub>3</sub>Na [M+Na]<sup>+</sup>: 390.1582. Found: 390.1568.

HPLC conditions: Chiralcel OD-H column (4.6 mm × 250 mm), hexane/*i*-PrOH, 85:15 v/v, flow rate = 1 mL/min, λ = 254 nm, 25 °C. *t*<sub>R</sub> (minor) = 14.98 min, *t*<sub>R</sub> (major) = 32.95 min, ee > 99%. [α]<sub>D</sub><sup>26</sup> = +38.5 (c = 1.0, CHCl<sub>3</sub>).

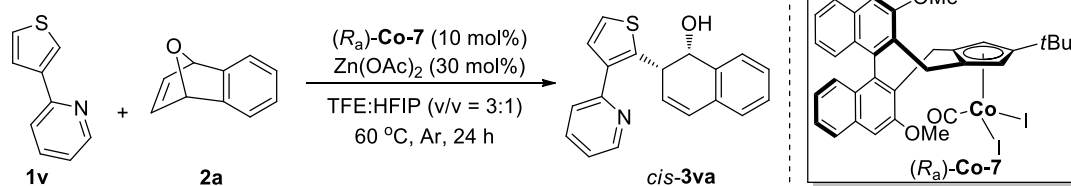

**Procedure for the synthesis of *cis*-3va.** A sealed tube with a magnetic stir bar was charged with (*R*<sub>a</sub>)-**Co-7** (8.0 mg, 0.010 mmol), Zn(OAc)<sub>2</sub> (5.5 mg, 0.030 mmol), **1v** (16.1 mg, 0.10 mmol), **2a** (21.6 mg, 0.15 mmol), TFE (0.3 mL) and HFIP (0.1 mL) under argon atmosphere. The mixture was stirred at 60 °C for 24 h. Then, the mixture was cooled to room temperature and quenched by saturated NH<sub>4</sub>Cl aqueous solution (20 mL). The resulting mixture was extracted with ethyl acetate (3 × 15 mL). The combined organic phase was dried over anhydrous Na<sub>2</sub>SO<sub>4</sub> and filtered. All the volatiles were evaporated under reduced pressure. The remaining residue was purified by column chromatography on silica gel (hexanes/ethyl acetate = 8:1 to 4:1) to afford *cis*-**3va**.

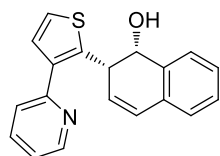

*cis*-**3va**, 9.8 mg, 32% yield, yellow oil. <sup>1</sup>H NMR (400 MHz, CDCl<sub>3</sub>) δ 8.61-8.52 (m, 1H), 7.87 (d, *J* = 7.6 Hz, 1H), 7.82 (td, *J* = 7.6, 1.6 Hz, 1H), 7.59 (d, *J* = 8.0 Hz, 1H), 7.41-7.32 (m, 2H), 7.28-7.24 (m, 3H), 7.11 (d, *J* = 7.2 Hz, 1H), 6.55 (dd, *J* = 9.6, 3.2 Hz, 1H), 6.05 (dd, *J* = 9.6, 2.4 Hz, 1H), 5.03 (d, *J* = 13.2 Hz, 1H), 4.66 (dt, *J* = 13.2, 2.8 Hz, 1H). <sup>13</sup>C NMR (100 MHz, CDCl<sub>3</sub>) δ 153.8, 148.0, 146.5, 140.1, 138.8, 137.8, 132.4, 130.8, 128.5, 128.3, 128.0, 127.2, 126.0, 125.0, 123.8, 123.6, 122.2, 76.1, 43.1.

IR (thin film):  $\nu_{\max}$  (cm<sup>-1</sup>) = 3062, 2921, 2851, 2815, 1726, 1591, 1567, 1533, 1476, 1449, 1374, 1282, 1248, 1195, 1154, 1114, 1076, 1034, 1000, 959, 905, 859, 832, 784, 767, 721, 692, 672, 649, 628.

HRMS (ESI) calcd for C<sub>19</sub>H<sub>15</sub>ONS [M-H<sub>2</sub>O+H]<sup>+</sup>: 288.0847. Found: 288.0844.

HPLC conditions: Chiralcel AD-H column (4.6 mm × 250 mm), hexane/*i*-PrOH, 90:10 v/v, flow rate = 1 mL/min, λ = 303 nm, 25 °C. *t*<sub>R</sub> (major) = 9.92 min, *t*<sub>R</sub> (minor) = 13.14 min, ee = 70%. [α]<sub>D</sub><sup>25</sup> = -23.6 (c = 0.2, CHCl<sub>3</sub>).

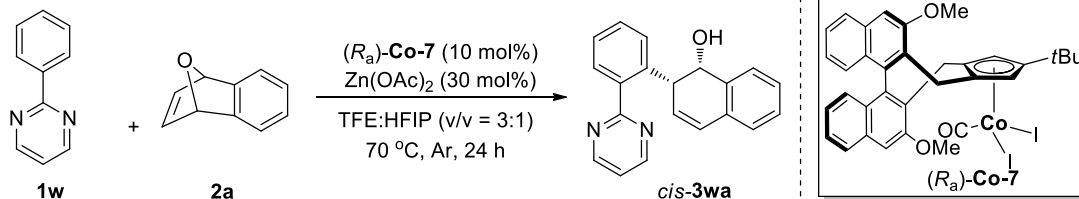

**Procedure for the synthesis of *cis*-3wa.** A sealed tube with a magnetic stir bar was charged with (*R*<sub>a</sub>)-**Co-7** (8.0 mg, 0.010 mmol), Zn(OAc)<sub>2</sub> (5.5 mg, 0.030 mmol), **1w** (16.1 mg, 0.10 mmol), **2a** (21.6 mg, 0.15 mmol), TFE (0.3 mL) and HFIP (0.1 mL) under argon atmosphere. The mixture was stirred at 70 °C for 24 h. Then, the mixture was cooled to room temperature and quenched by saturated NH<sub>4</sub>Cl aqueous solution (20 mL). The resulting mixture was extracted with ethyl acetate (3 × 15 mL). The combined organic phase was dried over anhydrous Na<sub>2</sub>SO<sub>4</sub> and

## SUPPLEMENTARY INFORMATION

filtered. All the volatiles were evaporated under reduced pressure. The remaining residue was purified by column chromatography on silica gel (hexanes/ethyl acetate = 8:1 to 4:1) to afford *cis*-**3wa**.

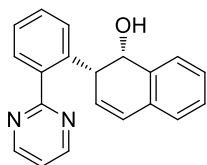

*cis*-**3wa**, 7.5 mg, 25% yield, yellow oil.  $^1\text{H NMR}$  (400 MHz,  $\text{CDCl}_3$ )  $\delta$  8.83 (d,  $J$  = 4.8 Hz, 2H), 7.85 (dd,  $J$  = 8.0, 1.6 Hz, 1H), 7.80 (d,  $J$  = 7.6 Hz, 1H), 7.75 (d,  $J$  = 8.0 Hz, 1H), 7.55 (td,  $J$  = 7.6, 1.6 Hz, 1H), 7.47-7.40 (m, 1H), 7.32 (t,  $J$  = 7.6 Hz, 1H), 7.28 (t,  $J$  = 4.8 Hz, 1H), 7.23 (t,  $J$  = 7.2 Hz, 1H), 7.06 (d,  $J$  = 7.2 Hz, 1H), 6.71 (d,  $J$  = 6.4 Hz, 1H), 6.51 (dd,  $J$  = 9.6, 2.8 Hz, 1H), 5.86 (dd,  $J$  = 9.6, 2.4 Hz, 1H), 5.18-5.05 (m, 1H), 4.41 (dt,  $J$  = 13.2, 2.4 Hz, 1H).  $^{13}\text{C NMR}$  (100 MHz,  $\text{CDCl}_3$ )  $\delta$  166.8, 157.3, 143.2, 140.1, 138.6, 133.0, 132.9, 131.4, 131.1, 129.5, 128.5, 128.4, 127.6, 127.4, 126.1, 125.0, 119.3, 76.4, 45.6.

**IR** (thin film):  $\nu_{\text{max}}$  ( $\text{cm}^{-1}$ ) = 3158, 3066, 2921, 2851, 2825, 1635, 1571, 1555, 1451, 1433, 1413, 1293, 1245, 1193, 1154, 1114, 1076, 1032, 996, 951, 902, 870, 826, 779, 755, 687, 648.

**HRMS** (ESI) calcd for  $\text{C}_{20}\text{H}_{16}\text{ON}_2$  [ $\text{M}-\text{H}_2\text{O}+\text{H}$ ] $^+$ : 283.1235. Found: 283.1233.

**HPLC** conditions: Chiralcel AD-H column (4.6 mm  $\times$  250 mm), hexane/*i*-PrOH, 85:15 v/v, flow rate = 1 mL/min,  $\lambda$  = 254 nm, 25  $^\circ\text{C}$ .  $t_{\text{R}}$  (major) = 9.57 min,  $t_{\text{R}}$  (minor) = 23.40 min, ee = 53%.  $[\alpha]_{\text{D}}^{28}$  = -20.0 ( $c$  = 0.2,  $\text{CHCl}_3$ ).

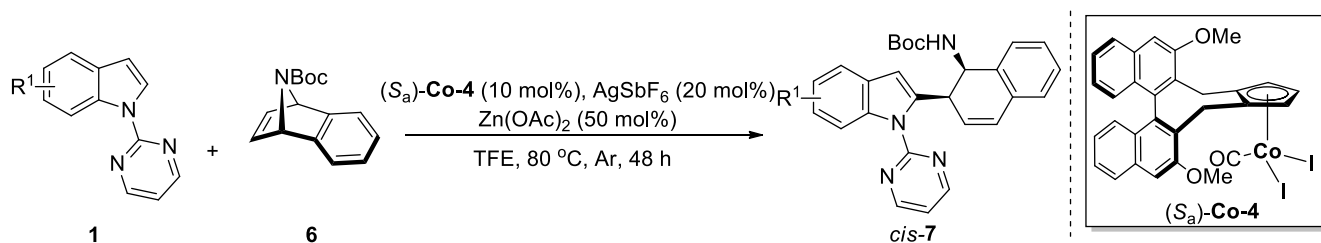

**General procedure.** A sealed tube with a magnetic stir bar was charged with (*S<sub>a</sub>*)-**Co-4** (7.6 mg, 0.010 mmol),  $\text{AgSbF}_6$  (6.8 mg, 0.020 mmol),  $\text{Zn}(\text{OAc})_2$  (9.2 mg, 0.050 mmol), **1** (0.15 mmol), **6** (24.3 mg, 0.10 mmol) and TFE (1.0 mL) under argon atmosphere. The mixture was stirred at 80  $^\circ\text{C}$  for 48 h. Then, the mixture was cooled to room temperature and quenched by saturated  $\text{NH}_4\text{Cl}$  aqueous solution (20 mL). The resulting mixture was extracted with ethyl acetate (3  $\times$  15 mL). The combined organic phase was dried over anhydrous  $\text{Na}_2\text{SO}_4$  and filtered. All the volatiles were evaporated under reduced pressure. The remaining residue was purified by column chromatography on silica gel (hexanes/ethyl acetate = 10:1 to 6:1) to afford *cis*-**7**.

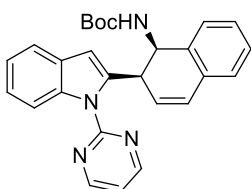

*cis*-**7aa**, 25.4 mg, 58% yield, yellow oil.  $^1\text{H NMR}$  (400 MHz,  $\text{CDCl}_3$ )  $\delta$  8.80 (d,  $J$  = 4.8 Hz, 2H), 8.30 (d,  $J$  = 8.4 Hz, 1H), 7.46 (d,  $J$  = 7.6 Hz, 1H), 7.30 (d,  $J$  = 8.4 Hz, 2H), 7.26-7.21 (m, 2H), 7.19-7.14 (m, 3H), 6.65 (d,  $J$  = 9.6 Hz, 1H), 6.48 (s, 1H), 6.29 (dd,  $J$  = 9.6, 4.0 Hz, 1H), 5.45 (dd,  $J$  = 10.0, 6.0 Hz, 1H), 5.13 (d,  $J$  = 5.6 Hz, 1H), 4.95 (d,  $J$  = 10.4 Hz, 1H), 1.20 (s, 9H).  $^{13}\text{C NMR}$  (100 MHz,  $\text{CDCl}_3$ )  $\delta$  158.4, 155.2, 138.8, 137.2, 135.4, 133.0, 130.5, 129.2, 128.2, 128.1, 128.0, 126.61, 126.56, 123.1, 122.0, 120.1, 117.3, 114.4, 107.6, 79.3, 51.4, 38.7, 28.3.

**IR** (thin film):  $\nu_{\text{max}}$  ( $\text{cm}^{-1}$ ) = 2962, 2920, 1707, 1616, 1562, 1485, 1421, 1345, 1262, 1157, 1098, 1027, 923, 860, 804, 629, 527, 478, 442.

**HRMS** (ESI) calcd for  $\text{C}_{27}\text{H}_{26}\text{O}_2\text{N}_4\text{Na}$  [ $\text{M}+\text{Na}$ ] $^+$ : 461.1953. Found: 461.1942.

**HPLC** conditions: Chiralcel AD-3 column (4.6 mm  $\times$  250 mm), hexane/*i*-PrOH, 80:20 v/v, flow rate = 0.7 mL/min,  $\lambda$  = 254 nm, 30  $^\circ\text{C}$ .  $t_{\text{R}}$  (major) = 9.84 min,  $t_{\text{R}}$  (minor) = 15.27 min, ee = 96%.  $[\alpha]_{\text{D}}^{28}$  = -26.1 ( $c$  = 0.5,  $\text{CHCl}_3$ ).

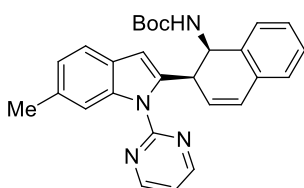

## SUPPLEMENTARY INFORMATION

*cis*-**7ab**, 28.5 mg, 63% yield, yellow oil.  $^1\text{H NMR}$  (400 MHz,  $\text{CDCl}_3$ )  $\delta$  8.83 (d,  $J = 4.8$  Hz, 2H), 8.11 (s, 1H), 7.36 (d,  $J = 8.0$  Hz, 1H), 7.33-7.29 (m, 2H), 7.28-7.24 (m, 1H), 7.21-7.15 (m, 2H), 7.02 (d,  $J = 8.0$  Hz, 1H), 6.70-6.62 (m, 1H), 6.44 (s, 1H), 6.31 (dd,  $J = 10.0, 4.4$  Hz, 1H), 5.45 (dd,  $J = 10.0, 6.4$  Hz, 1H), 5.10 (d,  $J = 6.0$  Hz, 1H), 4.97 (d,  $J = 10.0$  Hz, 1H), 2.50 (s, 3H), 1.25 (s, 9H).  $^{13}\text{C NMR}$  (100 MHz,  $\text{CDCl}_3$ )  $\delta$  158.38, 158.34, 155.3, 138.0, 137.5, 135.5, 133.0, 132.9, 130.6, 128.1, 127.9, 127.8, 126.9, 126.5, 126.4, 123.5, 119.7, 117.2, 114.2, 107.4, 79.3, 51.5, 38.5, 28.3, 22.2.

**IR** (thin film):  $\nu_{\text{max}}$  ( $\text{cm}^{-1}$ ) = 2976, 2922, 1705, 1564, 1487, 1422, 1365, 1340, 1226, 1161, 1054, 907, 861, 813, 777, 727, 645.

**HRMS** (ESI) calcd for  $\text{C}_{28}\text{H}_{28}\text{O}_2\text{N}_4\text{Na}$   $[\text{M}+\text{Na}]^+$ : 475.2110. Found: 475.2111.

**HPLC** conditions: Chiralcel IG column (4.6 mm  $\times$  250 mm), hexane/*i*-PrOH, 90:10 v/v, flow rate = 0.7 mL/min,  $\lambda = 254$  nm, 30  $^\circ\text{C}$ .  $t_{\text{R}}$  (major) = 21.63 min,  $t_{\text{R}}$  (minor) = 23.96 min, ee = 95%.  $[\alpha]_{\text{D}}^{30} = -46.1$  ( $c = 0.5$ ,  $\text{CHCl}_3$ ).

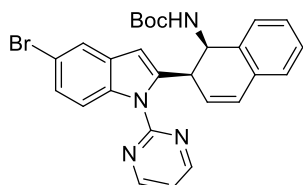

*cis*-**7ac**, 31.0 mg, 60% yield, yellow oil.  $^1\text{H NMR}$  (400 MHz,  $\text{CDCl}_3$ )  $\delta$  8.78 (d,  $J = 4.8$  Hz, 2H), 8.21 (d,  $J = 8.8$  Hz, 1H), 7.58 (s, 1H), 7.34-7.21 (m, 4H), 7.19-7.12 (m, 2H), 6.65 (dd,  $J = 9.6, 2.4$  Hz, 1H), 6.43 (s, 1H), 6.22 (dd,  $J = 9.6, 4.0$  Hz, 1H), 5.43 (dd,  $J = 10.4, 6.0$  Hz, 1H), 5.15-5.12 (m, 1H), 4.88 (d,  $J = 10.4$  Hz, 1H), 1.17 (s, 9H).  $^{13}\text{C NMR}$  (100 MHz,  $\text{CDCl}_3$ )  $\delta$  158.3, 158.0, 154.9, 140.5, 135.8, 135.1, 132.7, 130.9, 123.0, 128.2, 128.1, 128.0, 126.9, 126.5, 125.6, 122.3, 117.5, 116.2, 115.0, 106.8, 79.3, 51.1, 39.1, 28.2.

**IR** (thin film):  $\nu_{\text{max}}$  ( $\text{cm}^{-1}$ ) = 3421, 2975, 2928, 1705, 1563, 1489, 1443, 1419, 1364, 1334, 1292, 1259, 1226, 1158, 1055, 1015, 990, 944, 906, 862, 795, 775, 733, 699, 675, 645, 632.

**HRMS** (ESI) calcd for  $\text{C}_{27}\text{H}_{25}\text{O}_2\text{N}_4\text{BrNa}$   $[\text{M}+\text{Na}]^+$ : 539.1059. Found: 539.1050.

**HPLC** conditions: Chiralcel IG column (4.6 mm  $\times$  250 mm), hexane/*i*-PrOH, 80:20 v/v, flow rate = 0.7 mL/min,  $\lambda = 254$  nm, 30  $^\circ\text{C}$ .  $t_{\text{R}}$  (minor) = 16.85 min,  $t_{\text{R}}$  (major) = 24.92 min, ee = 95%.  $[\alpha]_{\text{D}}^{29} = -74.2$  ( $c = 0.2$ ,  $\text{CHCl}_3$ ).

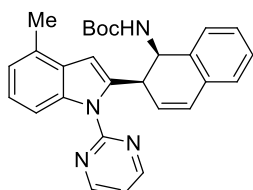

*cis*-**7ad**, 27.6 mg, 61% yield, yellow oil.  $^1\text{H NMR}$  (400 MHz,  $\text{CDCl}_3$ )  $\delta$  8.79 (d,  $J = 4.8$  Hz, 2H), 8.13 (d,  $J = 8.4$  Hz, 1H), 7.30 (t,  $J = 6.0$  Hz, 2H), 7.25-7.10 (m, 4H), 6.97 (d,  $J = 7.2$  Hz, 1H), 6.66 (dd,  $J = 9.6, 2.4$  Hz, 1H), 6.52 (s, 1H), 6.27 (dd,  $J = 9.6, 4.0$  Hz, 1H), 5.43 (dd,  $J = 10.4, 6.4$  Hz, 1H), 5.15 (s, 1H), 4.95 (d,  $J = 10.4$  Hz, 1H), 2.47 (s, 3H), 1.17 (s, 9H).  $^{13}\text{C NMR}$  (100 MHz,  $\text{CDCl}_3$ )  $\delta$  158.5, 158.3, 155.1, 138.3, 137.0, 135.4, 132.9, 130.6, 129.2, 128.8, 128.1, 128.0, 126.9, 126.5, 123.1, 122.3, 117.3, 112.0, 106.1, 79.2, 51.4, 39.0, 28.3, 18.7.

**IR** (thin film):  $\nu_{\text{max}}$  ( $\text{cm}^{-1}$ ) = 2975, 2923, 1705, 1564, 1488, 1424, 1364, 1345, 1299, 1281, 1247, 1227, 1157, 1106, 1089, 1054, 1026, 907, 860, 806, 769, 728, 640, 619.

**HRMS** (ESI) calcd for  $\text{C}_{28}\text{H}_{28}\text{O}_2\text{N}_4\text{Na}$   $[\text{M}+\text{Na}]^+$ : 475.2110. Found: 475.2108.

**HPLC** conditions: Chiralcel AD-H column (4.6 mm  $\times$  250 mm), hexane/*i*-PrOH, 90:10 v/v, flow rate = 0.7 mL/min,  $\lambda = 254$  nm, 30  $^\circ\text{C}$ .  $t_{\text{R}}$  (major) = 11.17 min,  $t_{\text{R}}$  (minor) = 18.74 min, ee = 96%.  $[\alpha]_{\text{D}}^{29} = -33.2$  ( $c = 0.5$ ,  $\text{CHCl}_3$ ).

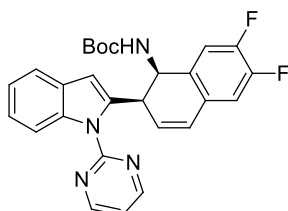

*cis*-**7ae**, 26.1 mg, 55% yield, yellow oil.  $^1\text{H NMR}$  (400 MHz,  $\text{CDCl}_3$ )  $\delta$  8.82 (d,  $J = 4.8$  Hz, 2H), 8.29 (d,  $J = 8.4$  Hz, 1H), 7.47 (d,  $J = 7.6$  Hz, 1H), 7.26-7.21 (m, 1H), 7.21-7.16 (m, 2H), 7.11 (dd,  $J = 10.8, 7.6$  Hz, 1H), 6.97 (dd,  $J = 10.8, 7.6$  Hz, 1H), 6.53 (d,  $J = 9.6$  Hz, 1H), 6.42 (s, 1H), 6.32 (dd,  $J = 9.6, 4.8$  Hz, 1H), 5.39 (t,  $J = 8.4$  Hz, 1H), 5.09 (d,  $J = 6.0$  Hz, 1H), 4.94 (d,  $J = 10.0$  Hz, 1H), 1.23 (s, 9H).  $^{13}\text{C NMR}$  (100 MHz,  $\text{CDCl}_3$ )  $\delta$  158.44, 158.25, 155.23, 149.85 (dd,  $J = 248, 7.4$  Hz), 149.7 (dd,  $J = 248, 7.4$  Hz), 137.7, 137.2, 132.4-132.3 (m), 131.22, 129.9-129.8 (m), 126.2, 123.4, 122.2, 120.2, 117.5, 115.9 (d,  $J = 18.8$  Hz), 115.3 (d,  $J = 18.8$  Hz), 114.4, 107.6, 79.8, 51.0, 37.9, 29.9, 28.3.  $^{19}\text{F NMR}$  (376 MHz,  $\text{CDCl}_3$ )  $\delta$  -138.14 (d,  $J = 20.8$  Hz), -140.16 (d,  $J = 20.8$  Hz).

## SUPPLEMENTARY INFORMATION

**IR** (thin film):  $\nu_{\max}$  (cm<sup>-1</sup>) = 2925, 2854, 2350, 1708, 1577, 1564, 1504, 1454, 1427, 1367, 1347, 1309, 1248, 1164, 1083, 1050, 1021, 883, 806, 784, 749, 663, 637, 619.

**HRMS** (ESI) calcd for C<sub>27</sub>H<sub>24</sub>F<sub>2</sub>N<sub>4</sub>NaO<sub>2</sub> [M+Na]<sup>+</sup>: 497.1765. Found: 497.1763.

**HPLC** conditions: [Waters upc, SFC system] Chiralcel IG-3 column (4.6 mm × 250 mm), CO<sub>2</sub>/EtOH, 80:20 v/v, flow rate = 1.0 mL/min,  $\lambda$  = 210 nm, 20 °C.  $t_R$  (major) = 14.46 min,  $t_R$  (minor) = 17.08 min, ee = 94%.  $[\alpha]_D^{30}$  = -72.1 (c = 0.2, CHCl<sub>3</sub>).

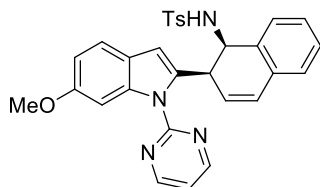

**cis-7af**, 26.1 mg, 50% yield, pale yellow foam. **<sup>1</sup>H NMR** (400 MHz, CDCl<sub>3</sub>) 8.74 (d,  $J$  = 4.8 Hz, 2H), 7.88 (d,  $J$  = 2.4 Hz, 1H), 7.43 (d,  $J$  = 7.2 Hz, 1H), 7.32-7.21 (m, 5H), 7.19-7.10 (m, 2H), 6.85 (dd,  $J$  = 8.4, 2.4 Hz, 1H), 6.67 (d,  $J$  = 8.0 Hz, 2H), 6.61 (dd,  $J$  = 9.6, 2.4 Hz, 1H), 6.35 (s, 1H), 6.11 (dd,  $J$  = 9.6, 3.6 Hz, 1H), 5.41 (d,  $J$  = 8.8 Hz, 1H), 5.11 (dd,  $J$  = 8.8, 6.0 Hz, 1H), 4.82 (dt,  $J$  = 5.6, 2.8 Hz, 1H), 3.89 (s, 3H), 2.14 (s, 3H). The analytical data are in accordance with those of the previous report.<sup>[12]</sup>

**HPLC** conditions: Chiralcel AD-H column (4.6 mm × 250 mm), hexane/*i*-PrOH, 70:30 v/v, flow rate = 1.0 mL/min,  $\lambda$  = 254 nm, 25 °C.  $t_R$  (major) = 12.31 min,  $t_R$  (minor) = 16.44 min, ee = 91%.  $[\alpha]_D^{29}$  = +39.9 (c = 0.5, CHCl<sub>3</sub>).

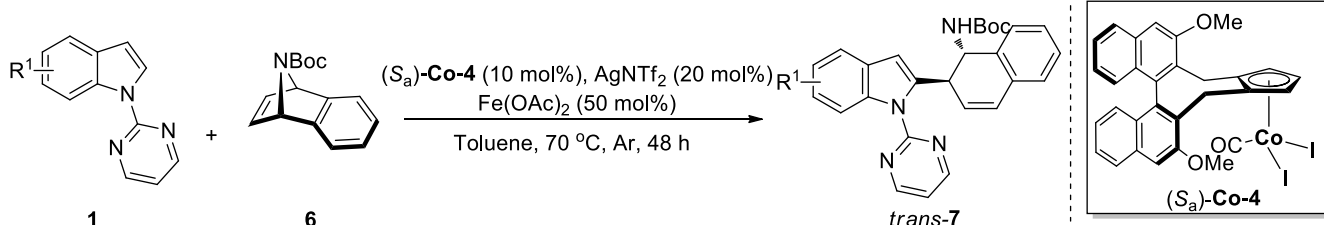

**General procedure.** A sealed tube with a magnetic stir bar was charged with (*S<sub>a</sub>*)-**Co-4** (7.6 mg, 0.010 mmol), AgNTf<sub>2</sub> (7.8 mg, 0.020 mmol), Fe(OAc)<sub>2</sub> (8.7 mg, 0.050 mmol), **1** (0.15 mmol), **6** (24.3 mg, 0.10 mmol) and toluene (1.0 mL) under argon atmosphere. The mixture was stirred at 70 °C for 48 h. Afterwards, the mixture was cooled to room temperature and quenched by saturated NH<sub>4</sub>Cl aqueous solution (20 mL). The resulting mixture was extracted with ethyl acetate (3 × 15 mL). The combined organic phase was dried over anhydrous Na<sub>2</sub>SO<sub>4</sub> and filtered. All the volatiles were evaporated under reduced pressure. The remaining residue was purified by column chromatography on silica gel (hexanes/ethyl acetate = 10:1 to 6:1) to afford *trans*-**7**.

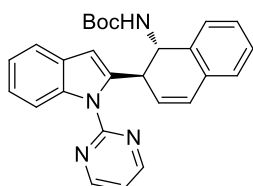

**trans-7aa**, 23.2 mg, 53% yield, yellow oil. **<sup>1</sup>H NMR** (400 MHz, CDCl<sub>3</sub>)  $\delta$  8.82 (d,  $J$  = 4.8 Hz, 2H), 8.23 (d,  $J$  = 8.4 Hz, 1H), 7.44 (d,  $J$  = 7.6 Hz, 1H), 7.30-7.25 (m, 1H), 7.23-7.18 (m, 3H), 7.15 (d,  $J$  = 7.6 Hz, 2H), 6.65 (d,  $J$  = 9.6 Hz, 1H), 6.47 (s, 1H), 6.11 (dd,  $J$  = 9.6, 4.4 Hz, 1H), 5.47 (d,  $J$  = 9.2 Hz, 1H), 5.24 (t,  $J$  = 7.2 Hz, 1H), 4.90 (t,  $J$  = 5.2 Hz, 1H), 1.35 (s, 9H). **<sup>13</sup>C NMR** (100 MHz, CDCl<sub>3</sub>)  $\delta$  158.5, 158.1, 155.2, 139.3, 137.4, 135.2, 132.5, 129.14, 129.09, 128.3, 128.1, 128.0, 127.9, 126.5, 123.1, 122.0, 120.3, 117.5, 114.0, 107.0, 79.3, 53.5, 40.2, 28.5.

**IR** (thin film):  $\nu_{\max}$  (cm<sup>-1</sup>) = 3041, 2974, 2928, 2246, 1704, 1562, 1489, 1452, 1423, 1346, 1259, 1158, 1054, 1016, 908, 859, 792, 728, 644, 530, 477.

**HRMS** (ESI) calcd for C<sub>27</sub>H<sub>26</sub>O<sub>2</sub>N<sub>4</sub>Na [M+Na]<sup>+</sup>: 461.1953. Found: 461.1938.

**HPLC** conditions: Chiralcel AD-3 column (4.6 mm × 250 mm), hexane/*i*-PrOH, 80:20 v/v, flow rate = 0.7 mL/min,  $\lambda$  = 254 nm, 30 °C.  $t_R$  (major) = 10.32 min,  $t_R$  (minor) = 16.41 min, ee = 82%.  $[\alpha]_D^{32}$  = -167.9 (c = 0.5, CHCl<sub>3</sub>).

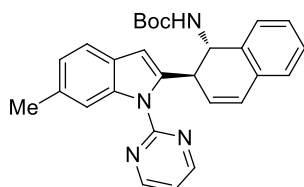



## SUPPLEMENTARY INFORMATION

**trans-7ab**, 25.8 mg, 57% yield, yellow foam. <sup>1</sup>H NMR (400 MHz, CDCl<sub>3</sub>) δ 8.83 (d, *J* = 4.8 Hz, 2H), 8.03 (s, 1H), 7.31 (d, *J* = 8.0 Hz, 1H), 7.26-7.16 (m, 3H), 7.16-7.11 (m, 1H), 6.97 (d, *J* = 8.0 Hz, 1H), 6.63 (d, *J* = 9.6 Hz, 1H), 6.42 (s, 1H), 6.10 (dd, *J* = 9.6, 4.8 Hz, 1H), 5.49 (d, *J* = 9.2 Hz, 1H), 5.29-5.11 (m, 1H), 4.90-4.80 (m, 1H), 2.46 (s, 3H), 1.36 (s, 9H). <sup>13</sup>C NMR (100 MHz, CDCl<sub>3</sub>) δ 158.4, 158.1, 155.2, 138.5, 137.7, 135.5, 135.2, 132.9, 132.5, 129.2, 128.3, 128.1, 127.9, 126.8, 126.5, 123.5, 119.9, 117.3, 113.9, 106.9, 79.2, 53.5, 40.1, 28.5, 22.2.

IR (thin film):  $\nu_{\max}$  (cm<sup>-1</sup>) = 2972, 2921, 1704, 1564, 1486, 1451, 1421, 1365, 1341, 1262, 1161, 1099, 1042, 1017, 909, 865, 806, 781, 761, 732, 698, 629, 597, 533, 489, 465, 438.

HRMS (ESI) calcd for C<sub>28</sub>H<sub>28</sub>O<sub>2</sub>N<sub>4</sub>Na [M+Na]<sup>+</sup>: 475.2110. Found: 475.2109.

HPLC conditions: Chiralcel AD-3 column (4.6 mm × 250 mm), hexane/*i*-PrOH, 90:10 v/v, flow rate = 0.7 mL/min, λ = 230 nm, 30 °C. *t*<sub>R</sub> (major) = 14.63 min, *t*<sub>R</sub> (minor) = 23.67 min, ee = 82%. [α]<sub>D</sub><sup>25</sup> = -137.0 (*c* = 0.5, CHCl<sub>3</sub>).

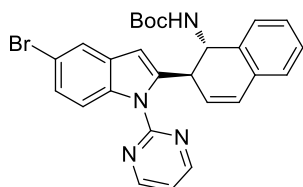

**trans-7ac**, 27.4 mg, 53% yield, yellow oil. <sup>1</sup>H NMR (400 MHz, CDCl<sub>3</sub>) δ 8.82 (d, *J* = 4.8 Hz, 2H), 8.12 (d, *J* = 8.8 Hz, 1H), 7.54 (s, 1H), 7.32-7.27 (m, 1H), 7.25-7.17 (m, 3H), 7.14 (d, *J* = 7.2 Hz, 1H), 6.66 (d, *J* = 9.6 Hz, 1H), 6.39 (s, 1H), 6.09 (dd, *J* = 9.6, 4.8 Hz, 1H), 5.36 (d, *J* = 9.6 Hz, 1H), 5.25-5.12 (m, 1H), 4.91 (t, *J* = 5.2 Hz, 1H), 1.35 (s, 9H). <sup>13</sup>C NMR (100 MHz, CDCl<sub>3</sub>) δ 158.4, 157.8, 155.0, 140.5, 137.7, 134.7, 132.3, 130.6, 128.4, 128.3, 128.2, 128.1, 127.9, 126.5, 125.7, 122.7, 117.6, 115.5, 115.0, 106.1, 79.2, 53.2, 40.1, 28.3.

IR (thin film):  $\nu_{\max}$  (cm<sup>-1</sup>) = 3062, 2920, 2851, 2815, 1726, 1695, 1591, 1568, 1533, 1476, 1450, 1375, 1319, 1282, 1248, 1195, 1154, 1114, 1076, 1034, 1001, 960, 905, 859, 832, 784, 767, 721, 693, 672, 649, 628.

HRMS (ESI) calcd for C<sub>27</sub>H<sub>25</sub>O<sub>2</sub>N<sub>4</sub>BrNa [M+Na]<sup>+</sup>: 539.1059. Found: 539.1049.

HPLC conditions: Chiralcel IG column (4.6 mm × 250 mm), hexane/*i*-PrOH, 80:20 v/v, flow rate = 0.7 mL/min, λ = 254 nm, 30 °C. *t*<sub>R</sub> (major) = 17.88 min, *t*<sub>R</sub> (minor) = 21.13 min, ee = 86%. [α]<sub>D</sub><sup>30</sup> = -169.6 (*c* = 0.8, CHCl<sub>3</sub>).

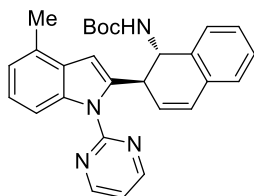

**trans-7ad**, 24.9 mg, 55% yield, yellow oil. <sup>1</sup>H NMR (400 MHz, CDCl<sub>3</sub>) δ 8.82 (d, *J* = 4.8 Hz, 2H), 8.05 (d, *J* = 8.4 Hz, 1H), 7.28 (d, *J* = 9.6 Hz, 1H), 7.26-7.16 (m, 3H), 7.16-7.09 (m, 2H), 6.95 (d, *J* = 7.2 Hz, 1H), 6.64 (d, *J* = 9.6 Hz, 1H), 6.53 (s, 1H), 6.10 (dd, *J* = 9.6, 4.4 Hz, 1H), 5.55 (d, *J* = 9.2 Hz, 1H), 5.25 (t, *J* = 8.0 Hz, 1H), 4.89 (ddd, *J* = 6.6, 4.4, 1.6 Hz, 1H), 2.44 (s, 3H), 1.36 (s, 9H). <sup>13</sup>C NMR (100 MHz, CDCl<sub>3</sub>) δ 158.4, 158.2, 155.3, 138.8, 137.1, 135.4, 132.6, 129.7, 129.4, 128.7, 128.2, 128.0, 127.9, 127.6, 126.5, 123.1, 122.3, 117.5, 111.4, 105.3, 79.2, 53.7, 40.1, 28.5, 18.7.

IR (thin film):  $\nu_{\max}$  (cm<sup>-1</sup>) = 2969, 2922, 2854, 1699, 1564, 1488, 1424, 1364, 1345, 1245, 1157, 1089, 1072, 1043, 1015, 988, 907, 858, 802, 768, 728, 639.

HRMS (ESI) calcd for C<sub>28</sub>H<sub>28</sub>O<sub>2</sub>N<sub>4</sub>Na [M+Na]<sup>+</sup>: 475.2110. Found: 475.2105.

HPLC conditions: Chiralcel AD-H column (4.6 mm × 250 mm), hexane/*i*-PrOH, 90:10 v/v, flow rate = 0.7 mL/min, λ = 254 nm, 30 °C. *t*<sub>R</sub> (major) = 15.18 min, *t*<sub>R</sub> (minor) = 20.53 min, ee = 77%. [α]<sub>D</sub><sup>27</sup> = -270.1 (*c* = 0.3, CHCl<sub>3</sub>).

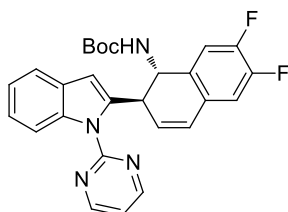

**trans-7ae**, 24.2 mg, 51% yield, yellow oil. <sup>1</sup>H NMR (400 MHz, CDCl<sub>3</sub>) δ 8.83 (d, *J* = 4.8 Hz, 2H), 8.25 (d, *J* = 8.4 Hz, 1H), 7.47 (d, *J* = 7.6 Hz, 1H), 7.25-7.18 (m, 2H), 7.16 (t, *J* = 7.6 Hz, 1H), 7.13-7.08 (m, 1H), 6.95 (dd, *J* = 10.4, 7.6 Hz, 1H), 6.54 (d, *J* = 9.2 Hz, 1H), 6.49 (s, 1H), 6.13 (dd, *J* = 9.6, 4.4 Hz, 1H), 5.64 (d, *J* = 9.2 Hz, 1H), 5.20 (t, *J* = 8.0 Hz, 1H), 4.84 (t, *J* = 5.6 Hz, 1H), 1.35 (s, 9H). <sup>13</sup>C NMR (100 MHz, CDCl<sub>3</sub>) δ 158.4, 157.9, 155.1, 149.78 (dd, *J* = 247.1, 13.0 Hz), 149.55 (dd, *J* = 247.1, 13.0 Hz), 138.5, 137.2, 132.2-132.1 (m), 130.0, 129.2-129.1 (m), 126.2, 123.2, 122.1, 120.3, 117.4, 117.0 (d, *J* = 18.0 Hz), 115.0 (d, *J* = 18.0 Hz), 114.0, 107.1, 79.5, 53.1, 39.5, 29.7, 28.3. <sup>19</sup>F NMR (376 MHz, CDCl<sub>3</sub>) δ -138.07 (d, *J* = 20.8 Hz), -139.89 (d, *J* = 20.8 Hz).

## SUPPLEMENTARY INFORMATION

**IR** (thin film):  $\nu_{\max}$  (cm<sup>-1</sup>) = 2963, 2924, 1703, 1565, 1505, 1455, 1427, 1390, 1367, 1347, 1308, 1260, 1164, 1098, 1049, 1020, 883, 802, 749, 698, 682, 665, 638, 619.

**HRMS** (ESI) calcd for C<sub>27</sub>H<sub>24</sub>F<sub>2</sub>N<sub>4</sub>NaO<sub>2</sub> [M+Na]<sup>+</sup>: 497.1765. Found: 497.1769.

**HPLC** conditions: [Waters upc, SFC system] Chiralcel IG-3 column (4.6 mm × 250 mm), CO<sub>2</sub>/EtOH, 80:20 v/v, flow rate = 1.0 mL/min,  $\lambda$  = 210 nm, 20 °C.  $t_R$  (major) = 13.58 min,  $t_R$  (minor) = 18.45 min, ee = 63%.  $[\alpha]_D^{31}$  = -168.4 ( $c$  = 0.2, CHCl<sub>3</sub>).

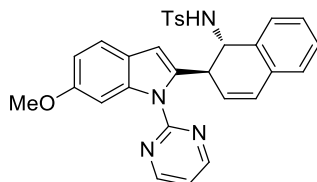

*trans*-7af, 23.0 mg, 44% yield, pale foam. **<sup>1</sup>H NMR** (400 MHz, CDCl<sub>3</sub>)  $\delta$  8.89 (d,  $J$  = 4.8 Hz, 2H), 7.97 (d,  $J$  = 6.4 Hz, 1H), 7.73-7.61 (m, 2H), 7.28 (d,  $J$  = 4.8 Hz, 1H), 7.26-7.24 (m, 1H), 7.21 (d,  $J$  = 8.0 Hz, 2H), 7.13 (d,  $J$  = 8.4 Hz, 1H), 7.10-7.04 (m, 1H), 6.83 (dd,  $J$  = 8.4, 2.4 Hz, 1H), 6.62 (d,  $J$  = 8.0 Hz, 2H), 6.50 (dd,  $J$  = 9.6, 2.4 Hz, 1H), 6.14 (s, 1H), 5.87 (dd,  $J$  = 9.6, 2.8 Hz, 1H), 4.77 (dd,  $J$  = 12.0, 6.4 Hz, 1H), 4.52 (dt,  $J$  = 12.0, 2.8 Hz, 1H), 3.89 (s, 3H), 2.14 (s, 3H). **<sup>13</sup>C NMR** (100 MHz, CDCl<sub>3</sub>)  $\delta$  158.8, 157.24, 157.15, 142.5, 139.2, 137.3, 137.1, 135.7, 132.8, 131.3, 129.0, 128.3, 128.0, 127.9, 127.4, 126.4, 126.2, 123.5, 120.8, 117.9, 111.2, 107.4, 98.3, 59.6, 56.0, 39.2, 21.7.

**IR** (thin film):  $\nu_{\max}$  (cm<sup>-1</sup>) = 3281, 2961, 2833, 2252, 1616, 1564, 1485, 1421, 1344, 1291, 1266, 1236, 1199, 1150, 1112, 1078, 1020, 953, 906, 807, 771, 727, 687, 659, 629, 580, 547, 522, 443.

**HRMS** (ESI) calcd for C<sub>30</sub>H<sub>26</sub>N<sub>4</sub>NaO<sub>3</sub>S [M+Na]<sup>+</sup>: 545.1623. Found: 545.1615.

**HPLC** conditions: Chiralcel AD-H column (4.6 mm × 250 mm), hexane/*i*-PrOH, 70:30 v/v, flow rate = 1.0 mL/min,  $\lambda$  = 254 nm, 25 °C.  $t_R$  (major) = 12.61 min,  $t_R$  (minor) = 14.23 min, ee = 63%.  $[\alpha]_D^{29}$  = -45.9 ( $c$  = 0.2, CHCl<sub>3</sub>).

## SUPPLEMENTARY INFORMATION

### 1.3 Gram-scale reaction and derivatization reactions

#### Gram-scale reaction

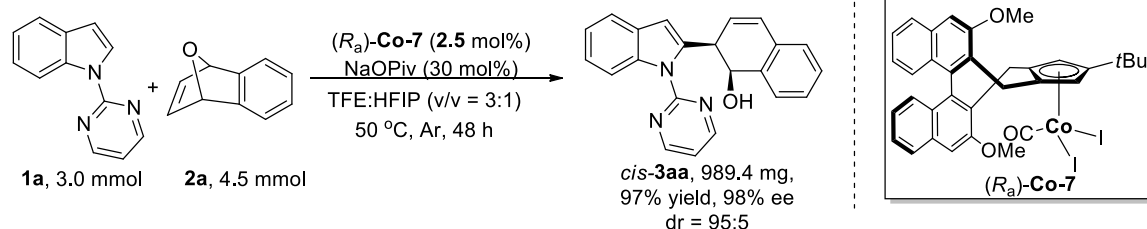

A 25 mL sealed tube with a magnetic stir bar was charged with  $(R_a)\text{-Co-7}$  (60.1 mg, 0.075 mmol), NaOPiv·H<sub>2</sub>O (127.9 mg, 0.9 mmol), **1a** (585.6 mg, 3.0 mmol), **2a** (648.9 mg, 4.5 mmol), TFE (9.0 mL) and HFIP (3.0 mL) under argon atmosphere. The mixture was stirred at 50 °C for 48 h. Then, the mixture was cooled to room temperature and quenched by saturated NH<sub>4</sub>Cl aqueous solution (50 mL). The resulting mixture was extracted with ethyl acetate (3 × 30 mL). The combined organic phase was dried over anhydrous Na<sub>2</sub>SO<sub>4</sub> and filtered. All the volatiles were evaporated under reduced pressure. The remaining residue was purified by column chromatography on silica gel (hexanes/ethyl acetate = 8:1 to 4:1) to afford  $cis\text{-3aa}$  in 97% yield and 98% ee (dr = 95:5).

#### Derivatization reactions

##### (a) Synthesis of compound **4**

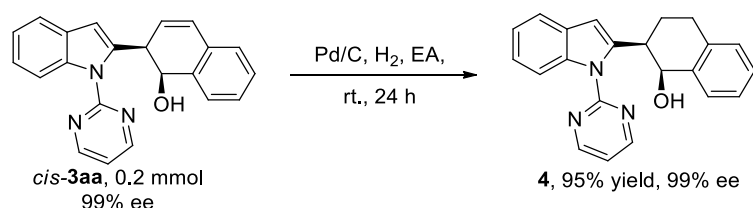

A 25 mL sealed tube with a magnetic stir bar was charged with  $cis\text{-3aa}$  (67.9 mg, 0.2 mmol), Pd/C (20.0 mg, palladium on activated carbon, 10% Pd basis, 0.1 equiv) and EtOAc (2 mL) under argon atmosphere. Then, the reaction mixture was exchanged with H<sub>2</sub> atmosphere (1 atm) and stirred at rt for 24 h. After completion (monitored by TLC), the crude reaction mixture was filtered with celite and washed with EtOAc. The solution was concentrated by rotary evaporation. After that, the residue was purified by column chromatography on silica gel (petroleum ether/ethyl acetate = 8/1 to 4/1) to afford **4**.

**4**, 64.9 mg, 95% yield, yellow oil. <sup>1</sup>H NMR (400 MHz, CDCl<sub>3</sub>) δ 8.78 (d, *J* = 4.8 Hz, 2H), 8.21 (d, *J* = 8.4 Hz, 1H), 7.59 (d, *J* = 7.2 Hz, 1H), 7.35 (d, *J* = 6.4 Hz, 1H), 7.26-7.14 (m, 6H), 6.69 (s, 1H), 5.01-4.88 (m, 1H), 4.18 (dt, *J* = 12.4, 3.2 Hz, 1H), 3.13-2.86 (m, 2H), 2.49 (qd, *J* = 12.4, 5.6 Hz, 1H), 2.20-1.99 (m, 2H). <sup>13</sup>C NMR (100 MHz, CDCl<sub>3</sub>) δ 158.5, 158.3, 141.8, 137.6, 137.3, 136.8, 130.6, 129.2, 129.1, 128.1, 126.2, 123.3, 122.2, 120.3, 117.6, 113.8, 107.2, 69.0, 39.4, 29.5, 23.1.

IR (thin film):  $\nu_{\text{max}}$  (cm<sup>-1</sup>) = 2931, 1562, 1453, 1422, 1347, 1210, 1084, 1054, 952, 806, 740, 666, 640, 442.

HRMS (ESI) calcd for C<sub>22</sub>H<sub>19</sub>ON<sub>3</sub>Na [M+Na]<sup>+</sup>: 364.1426. Found: 364.1423.

HPLC conditions: Chiralcel AD-H column (4.6 mm × 250 mm), hexane/*i*-PrOH, 80:20 v/v, flow rate = 1 mL/min, λ = 254 nm, 25 °C. t<sub>R</sub> (minor) = 24.11 min, t<sub>R</sub> (major) = 30.97 min, ee > 99%. [α]<sub>D</sub><sup>34</sup> = -506.5 (c = 1.0, CHCl<sub>3</sub>).

## SUPPLEMENTARY INFORMATION

### (b) Synthesis of compound 5

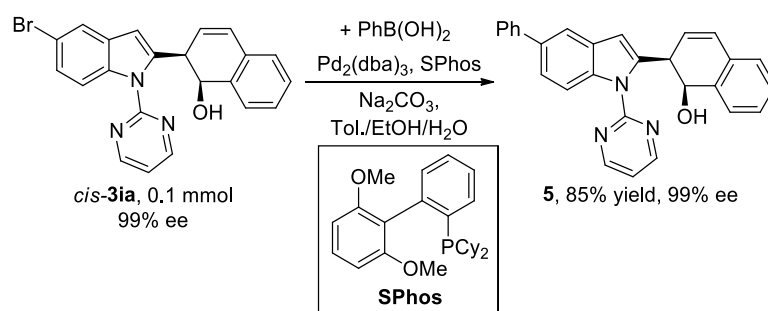

A sealed tube was filled with argon. To this flask were added Pd<sub>2</sub>dba<sub>3</sub> (2.4 mg, 0.0025 mmol, 2.5 mol%), SPhos (4.2 mg, 0.01 mmol, 10 mol%), *cis*-**3ia** (41.8 mg, 0.1 mmol, 1.0 equiv), PhB(OH)<sub>2</sub> (24.4 mg, 0.2 mmol, 2.0 equiv), Na<sub>2</sub>CO<sub>3</sub> (5.3 mg, 0.05 mmol, 0.5 equiv) and toluene/EtOH/H<sub>2</sub>O (0.75 mL/0.25 mL/0.25 mL). The reaction was sealed with Teflon plug and stirred at 80 °C for 6 h. After completion (monitored by TLC), the reaction was quenched by saturated NH<sub>4</sub>Cl aqueous solution (15 mL), and then extracted with EtOAc (3 × 15 mL). The combined organic fractions were dried over Na<sub>2</sub>SO<sub>4</sub>, filtered and concentrated by rotary evaporation. The residue was purified by column chromatography on silica gel (petroleum ether/ethyl acetate = 8/1 to 4/1) to afford **5**.

**5**, 35.2 mg, 85% yield, pale yellow foam. <sup>1</sup>H NMR (400 MHz, CDCl<sub>3</sub>) δ 8.88 (d, *J* = 4.8 Hz, 2H), 8.19 (d, *J* = 8.8 Hz, 1H), 7.64 (d, *J* = 1.6 Hz, 1H), 7.60 (dt, *J* = 6.4, 1.2 Hz, 2H), 7.54-7.49 (m, 1H), 7.46 (dd, *J* = 8.8, 2.0 Hz, 1H), 7.41 (t, *J* = 7.8 Hz, 2H), 7.33-7.27 (m, 4H), 7.22-7.18 (m, 1H), 6.68 (dd, *J* = 9.6, 1.6 Hz, 1H), 6.49 (s, 1H), 6.05 (dd, *J* = 9.6, 5.2 Hz, 1H), 5.65-5.57 (m, 1H), 5.41 (d, *J* = 7.2 Hz, 1H), 4.74 (ddd, *J* = 7.2, 5.2, 1.6 Hz, 1H). <sup>13</sup>C NMR (100 MHz, CDCl<sub>3</sub>) δ 158.4, 157.3, 142.0, 137.2, 136.6, 136.3, 135.5, 132.0, 129.6, 128.8, 128.6, 128.3, 127.9, 127.6, 127.3, 126.6, 125.9, 125.9, 122.7, 118.7, 117.6, 114.1, 109.4, 70.6, 38.8.

IR (thin film): ν<sub>max</sub> (cm<sup>-1</sup>) = 3240, 1602, 1571, 1421, 1345, 1180.21, 1086, 1024, 791, 759, 695, 637, 579.

HRMS (ESI) calcd for C<sub>28</sub>H<sub>21</sub>ON<sub>3</sub>Na [M+Na]<sup>+</sup>: 438.1582. Found: 438.1586.

HPLC conditions: Chiralcel OD-H column (4.6 mm × 250 mm), hexane/*i*-PrOH, 80:20 v/v, flow rate = 1 mL/min, λ = 254 nm, 25 °C. t<sub>R</sub> (minor) = 15.21 min, t<sub>R</sub> (major) = 25.83 min, ee > 99%. [α]<sub>D</sub><sup>25</sup> = +229.83 (c = 1.0, CHCl<sub>3</sub>).

### (c) Attempts to remove the pyrimidine group of the ARO products.

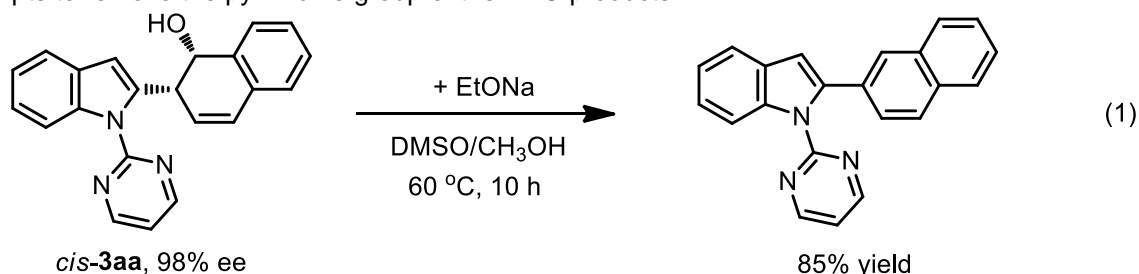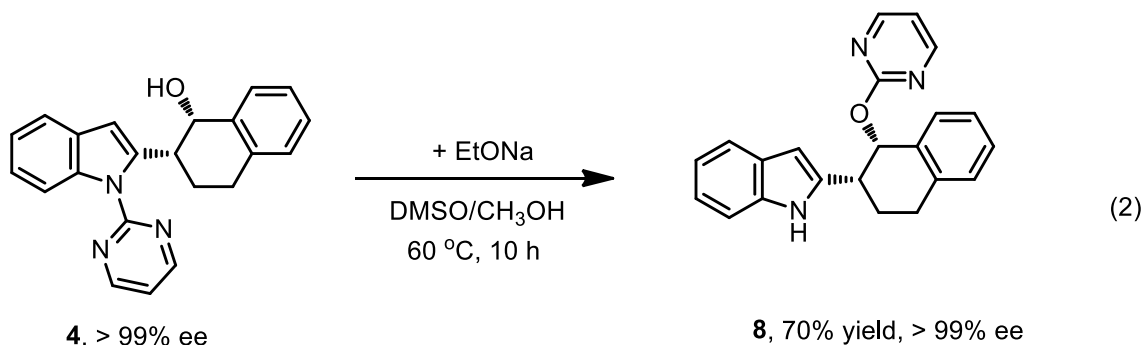

**Eq.1:** A 10 mL sealed tube with a magnetic stir bar was charged with *cis*-**3aa** (33.9 mg, 0.1 mmol), NaOEt (20.4 mg, 0.3 mmol), MeOH (0.1 mL) and DMSO (0.3 mL). Then the reaction was sealed with Teflon plug and stirred at 60 °C for 10 h. After completion (monitored by TLC), the reaction was quenched by saturated NH<sub>4</sub>Cl aqueous solution (15 mL), and then extracted with EtOAc (3 × 15 mL). The combined organic fractions were dried over Na<sub>2</sub>SO<sub>4</sub>, filtered and concentrated by rotary evaporation. The residue was purified by column chromatography on silica gel (petroleum ether/ethyl acetate = 20/1 to 10/1) to afford the aromatization product in 85% yield (27.3 mg).

## SUPPLEMENTARY INFORMATION

**<sup>1</sup>H NMR** (400 MHz, CDCl<sub>3</sub>) δ 8.67 (d, *J* = 4.8 Hz, 2H), 8.23 (d, *J* = 8.4 Hz, 1H), 7.96-7.89 (m, 1H), 7.86-7.78 (m, 2H), 7.74 (d, *J* = 8.4 Hz, 1H), 7.71 (d, *J* = 7.6 Hz, 1H), 7.54-7.45 (m, 2H), 7.38-7.30 (m, 2H), 7.28-7.26 (m, 1H), 7.13 (t, *J* = 4.8 Hz, 1H), 6.95 (s, 1H). The analytical data are in accordance with those of the previous report.<sup>[13]</sup>

**Eq.2:** A 10 mL sealed tube with a magnetic stir bar was charged with **4** (34.1 mg, 0.1 mmol), NaOEt (20.4 mg, 0.3 mmol), MeOH (0.1 mL) and DMSO (0.3 mL). Then the reaction was sealed with Teflon plug and stirred at 60 °C for 10 h. After completion (monitored by TLC), the reaction was quenched by saturated NH<sub>4</sub>Cl aqueous solution (15 mL), and then extracted with EtOAc (3 × 15 mL). The combined organic fractions were dried over Na<sub>2</sub>SO<sub>4</sub>, filtered and concentrated by rotary evaporation. The residue was purified by column chromatography on silica gel (petroleum ether/ethyl acetate = 15/1 to 6/1) to afford **8** in 70% yield (23.9 mg, pale foam).<sup>[14]</sup>

**<sup>1</sup>H NMR** (400 MHz, CDCl<sub>3</sub>) δ 8.68 (s, 1H), 8.42 (d, *J* = 4.8 Hz, 2H), 7.68 (d, *J* = 7.6 Hz, 1H), 7.49 (d, *J* = 7.6 Hz, 1H), 7.31-7.26 (m, 1H), 7.25-7.18 (m, 2H), 7.16 (t, *J* = 7.6 Hz, 1H), 7.11-6.96 (m, 2H), 6.81 (t, *J* = 4.8 Hz, 1H), 6.67 (d, *J* = 3.2 Hz, 1H), 6.35 (d, *J* = 2.0 Hz, 1H), 3.54 (dt, *J* = 12.4, 3.2 Hz, 1H), 3.16 (ddd, *J* = 17.2, 6.4, 3.2 Hz, 1H), 3.03 (ddd, *J* = 17.2, 10.8, 6.4 Hz, 1H), 2.75 (qd, *J* = 12.4, 6.4 Hz, 1H), 2.22-2.12 (m, 1H). **<sup>13</sup>C NMR** (100 MHz, CDCl<sub>3</sub>) δ 165.0, 159.3, 140.1, 137.1, 136.3, 134.8, 130.3, 129.3, 128.8, 128.1, 126.1, 121.2, 120.1, 119.5, 115.2, 110.8, 100.6, 74.9, 39.1, 28.8, 24.1.

**IR** (thin film):  $\nu_{\max}$  (cm<sup>-1</sup>) = 2961, 2924, 2852, 1572, 1456, 1416, 1309, 1041, 958, 800, 749, 693, 653, 636.

**HRMS** (ESI) calcd for C<sub>22</sub>H<sub>19</sub>N<sub>3</sub>NaO [M+Na]<sup>+</sup>: 364.1426. Found: 364.1420.

**HPLC** conditions: Chiralcel AD-H column (4.6 mm × 250 mm), hexane/*i*-PrOH, 90:10 v/v, flow rate = 1 mL/min, λ = 254 nm, 25 °C. *t*<sub>R</sub> (minor) = 10.82 min, *t*<sub>R</sub> (major) = 12.80 min, ee > 99%.  $[\alpha]_{\text{D}}^{29} = -70.64$  (*c* = 0.5, CHCl<sub>3</sub>).

# SUPPLEMENTARY INFORMATION

## 1.4 Mechanistic experiments

### (a) Deuterium-labeling experiments

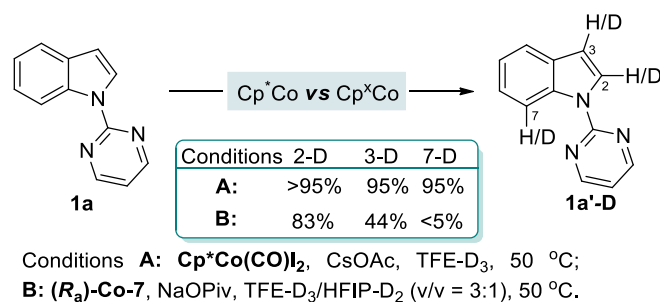

#### Conditions A (racemic reaction):

A 10 mL sealed tube with a magnetic stir bar was charged with  $\text{Cp}^*\text{Co}(\text{CO})\text{I}_2$  (1.2 mg, 0.0025 mmol), CsOAc (3.0 mg, 0.015 mmol), **1a** (10.0 mg, 0.05 mmol), TFE- $\text{D}_3$  (0.3 mL) under argon atmosphere. The resulting mixture was stirred at 50 °C for 18 h. Then, the mixture was cooled to room temperature and diluted with EtOAc (25 mL), and filtered through a celite pad. The filter cake was washed with EtOAc (30 mL) and the combined filtrate was washed with  $\text{H}_2\text{O}$  and brine. The organic layer was dried over  $\text{Na}_2\text{SO}_4$ , filtered and concentrated. The deuterated ratio was calculated based on  $^1\text{H}$  NMR analysis of the crude mixture.

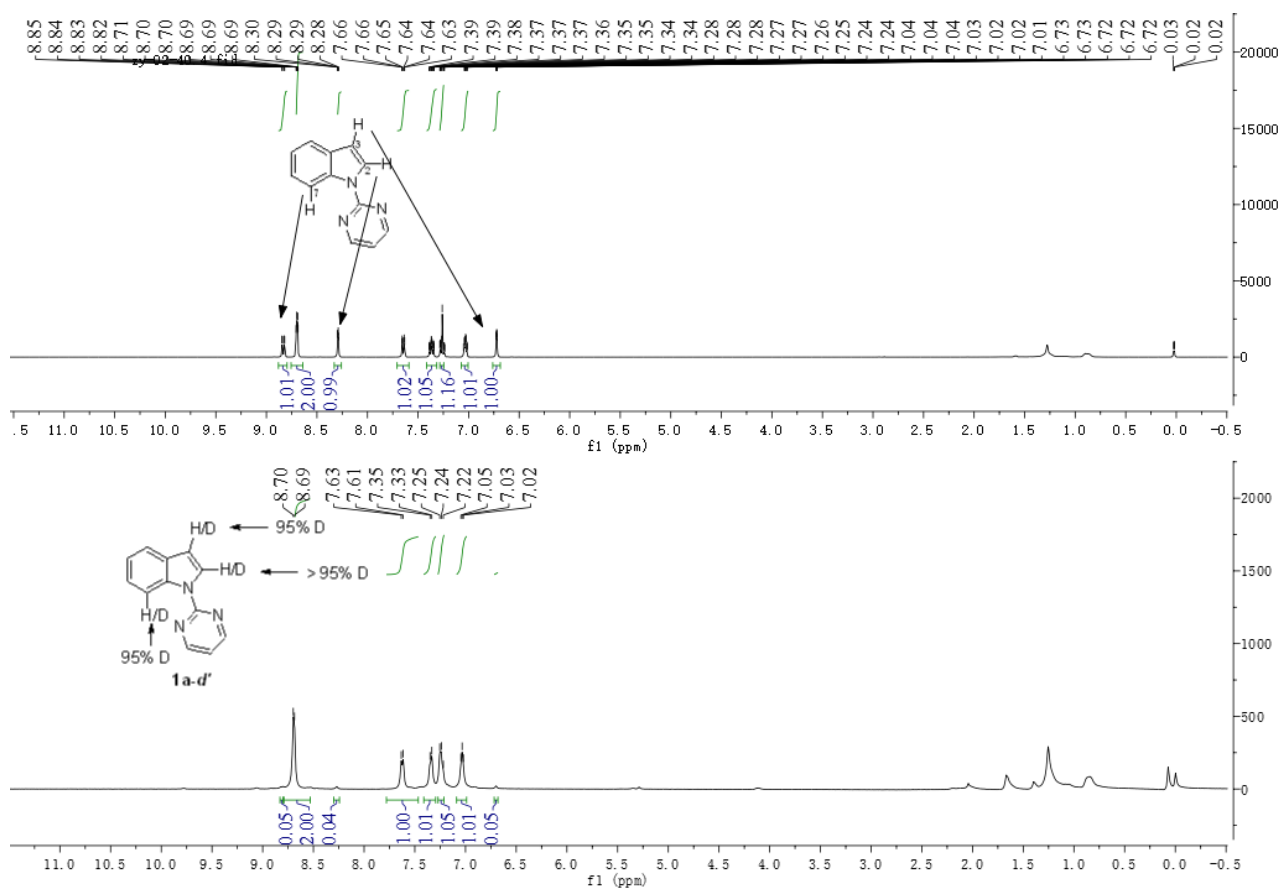

**Supplementary Fig. 1**  $^1\text{H}$  NMR spectrum for deuterium-labeling experiment

## SUPPLEMENTARY INFORMATION

### Conditions **B** (enantioselective reaction):

To a 10 mL sealed tube with a magnetic stir bar was charged with (*R*<sub>a</sub>)-**Co-7** (2.4 mg, 0.0025 mmol), NaOPiv·H<sub>2</sub>O (2.2 mg, 0.015 mmol), **1a** (10.0 mg, 0.05 mmol), TFE-D<sub>3</sub> (0.3 mL) and HFIP-D<sub>2</sub> (0.1 mL) under argon atmosphere. The resulting mixture was stirred at 50 °C for 18 h. Then, the mixture was cooled to room temperature and diluted with EtOAc (25 mL), and filtered through a celite pad. The filter cake was washed with EtOAc (30 mL) and the combined filtrate was washed with H<sub>2</sub>O and brine. The organic layer was dried over Na<sub>2</sub>SO<sub>4</sub>, filtered and concentrated. The deuterated ratio was calculated based on <sup>1</sup>H NMR analysis of the crude mixture.

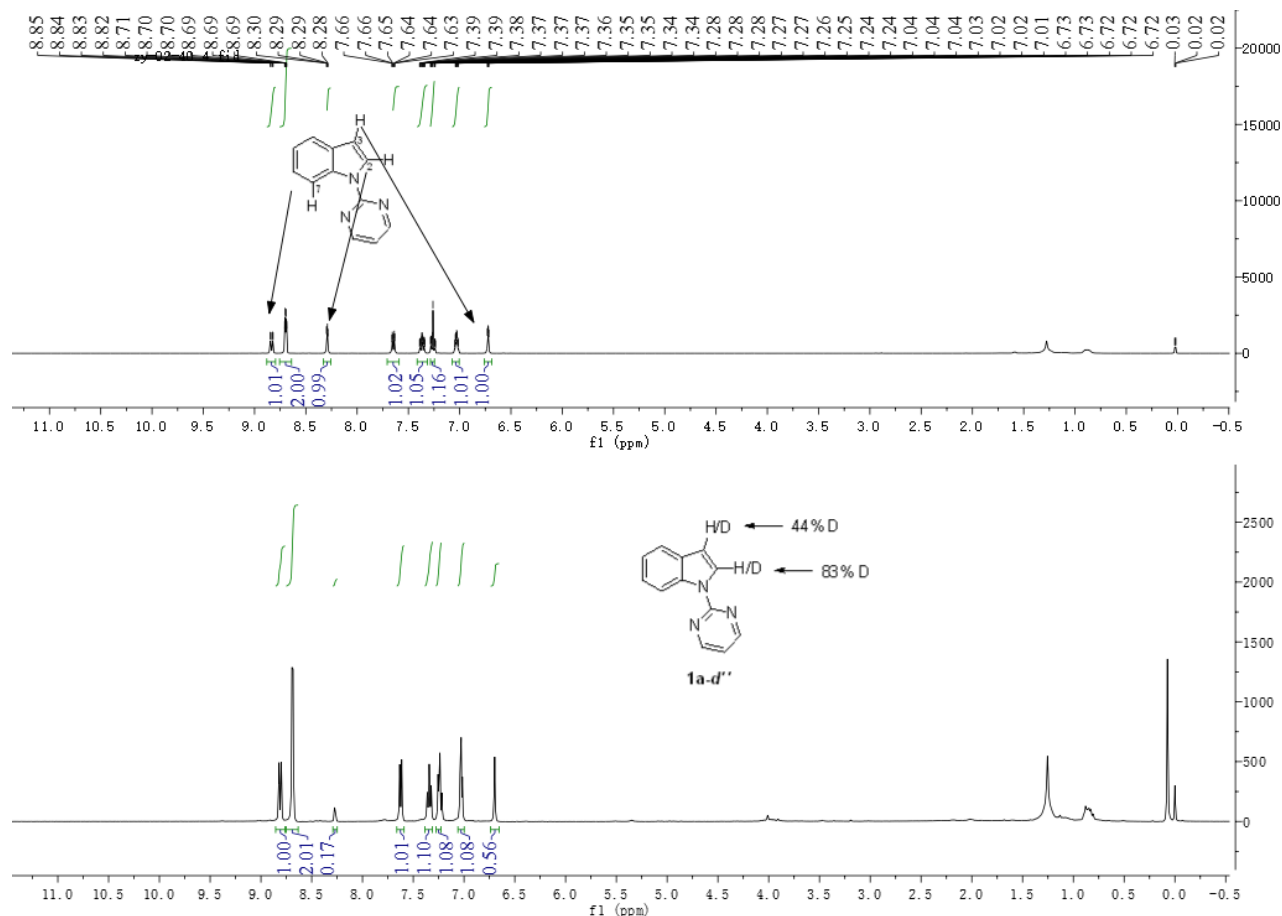

Supplementary Fig. 2 <sup>1</sup>H NMR spectrum for deuterium-labeling experiment

## SUPPLEMENTRAY INFORMATION

### (b) Intermolecular kinetic isotope effect of 2-pyrimidyl indole

Racemic reaction:

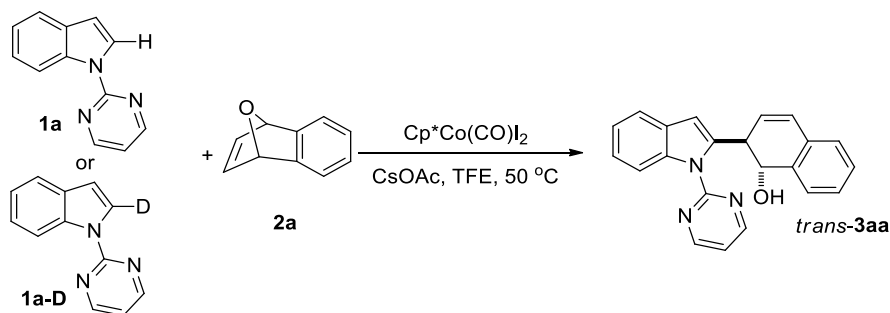

To a 10 mL sealed tube with a magnetic stir bar was charged with Cp\*Co(CO)I<sub>2</sub> (2.4 mg, 0.005 mmol), CsOAc (5.8 mg, 0.03 mmol), **1a** or **1a-D** (19.5 mg, 0.10 mmol), **2a** (21.6 mg, 0.15 mmol) and TFE (0.5 mL) under argon atmosphere. The resulting mixture was stirred at 50 °C. For each 30 min, 50  $\mu$ L of the reaction mixture was transferred to a short pad of silica gel and washed with ethyl acetate. The solvent was evaporated, and analyzed by <sup>1</sup>H NMR using dibromomethane as an internal standard. The KIE value ( $k_H/k_D$ ) was calculated to be 1.3 based on the initial reaction rates.

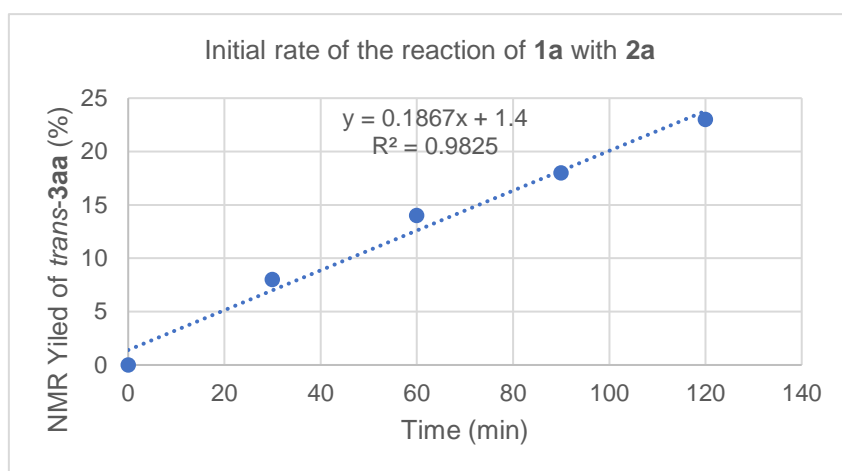

Supplementary Fig. 3 Initial rate of the reaction of **1a** with **2a**

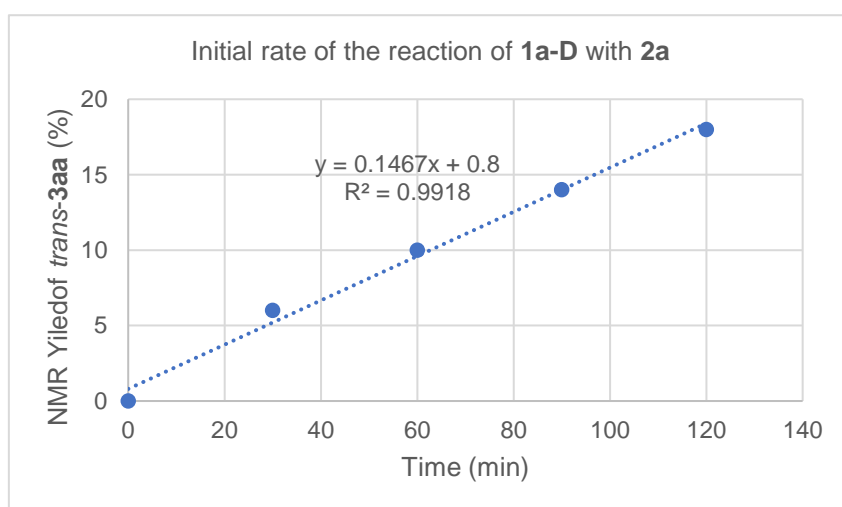

Supplementary Fig. 4 Initial rate of the reaction of **1a-D** with **2a**



## SUPPLEMENTARY INFORMATION

Enantioselective reaction:

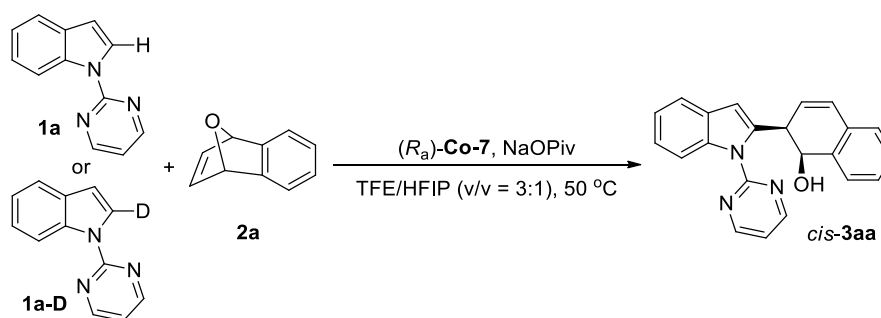

To a 10 mL sealed tube with a magnetic stir bar was charged with  $(R_a)$ -**Co-7** (4.0 mg, 0.005 mmol), NaOPiv·H<sub>2</sub>O (4.4 mg, 0.03 mmol), **1a** or **1a-D** (19.5 mg, 0.10 mmol), **2a** (21.6 mg, 0.15 mmol), TFE (0.3 mL) and HFIP (0.1 mL) under argon atmosphere. The resulting mixture was stirred at 50 °C. For each 30 min, 50  $\mu$ L of the reaction mixture was transferred to a short pad of silica gel and washed with ethyl acetate. The solvent was evaporated, and analyzed by <sup>1</sup>H NMR using dibromomethane as an internal standard. The KIE value ( $k_H/k_D$ ) was calculated to be 1.1 based on the initial reaction rates.

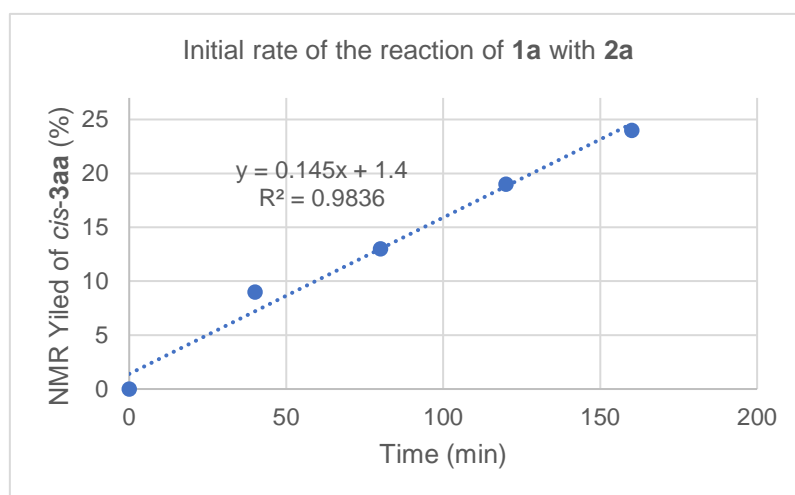

Supplementary Fig. 5 Initial rate of the reaction of **1a** with **2a**

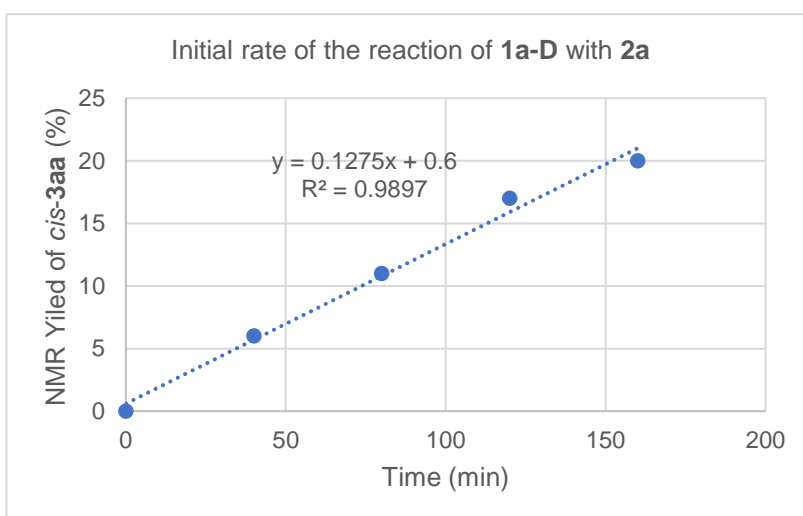

Supplementary Fig. 6 Initial rate of the reaction of **1a-D** with **2a**

## SUPPLEMENTARY INFORMATION

### (c) $^{13}\text{C}$ KIE Determination

#### Reference reaction

A sealed tube with a magnetic stir bar was charged with (*R*<sub>a</sub>)-**Co-7** (20.0 mg, 0.025 mmol), NaOPiv·H<sub>2</sub>O (44.0 mg, 0.3 mmol), **1a** (195.2 mg, 1.0 mmol), **2** (259.6 mg, 1.5 mmol), TFE (3.0 mL) and HFIP (1.0 mL) under argon atmosphere. The mixture was stirred at 50 °C for 25 h. Then, the mixture was cooled to room temperature and quenched by saturated NH<sub>4</sub>Cl aqueous solution (50 mL). The resulting mixture was extracted with ethyl acetate (3 × 25 mL). The combined organic phase was dried over anhydrous Na<sub>2</sub>SO<sub>4</sub> and filtered. All the volatiles were evaporated under reduced pressure. The remaining residue was purified by column chromatography on silica gel (hexanes/ethyl acetate = 8:1 to 4:1) to afford *cis*-**3aa** (310.8 mg, 91% yield). A sample of *cis*-**3aa** (150 mg) was subjected to quantitative  $^{13}\text{C}$  NMR analysis.

#### Low conversion reaction procedure

A sealed tube with a magnetic stir bar was charged with (*R*<sub>a</sub>)-**Co-7** (60.1 mg, 0.075 mmol), NaOPiv·H<sub>2</sub>O (127.9 mg, 0.9 mmol), **1a** (585.6 mg, 3.0 mmol), **2a** (648.9 mg, 4.5 mmol), TFE (9.0 mL) and HFIP (3.0 mL) under argon atmosphere. The mixture was stirred at 50 °C. Then, the mixture was cooled to room temperature and quenched by saturated NH<sub>4</sub>Cl aqueous solution (50 mL). The resulting mixture was extracted with ethyl acetate (3 × 25 mL). The combined organic phase was dried over anhydrous Na<sub>2</sub>SO<sub>4</sub> and filtered. All the volatiles were evaporated under reduced pressure. Two parallel experiments were performed at the conversions (of **1a**) of 25% (for 2.3 h) and 12% (for 1.0 h) monitored by  $^1\text{H}$  NMR. The remaining residues were purified by column chromatography on silica gel (hexanes/ethyl acetate = 8:1 to 4:1) to afford *cis*-**3aa**. The samples of *cis*-**3aa** (120 mg) were subjected to quantitative  $^{13}\text{C}$  NMR analysis.

#### NMR Measurements

Pure samples of *cis*-**3aa** were individually analyzed by  $^{13}\text{C}$  NMR spectroscopy, following the protocol of Singleton. The  $^{13}\text{C}$  NMR spectra were acquired on a Bruker Avance III 600 MHz spectrometer (150 MHz, CDCl<sub>3</sub>) at 28 °C with inverse-gated decoupling and calibrated  $2\pi/9$  pulses, collecting a total of 512k points. T<sub>1</sub> values were determined prior to the acquisitions, and delays of 120 s (120 s > 5 × T<sub>1</sub>) were utilized between pulses. Five independent acquisitions were obtained for each sample (~19 h acquisition time). Each spectrum was manually integrated three times with a 0th order baseline correction and phase correction.

#### Results

Carbon-13 KIEs ( $K_P$ ) were determined from the analysis of the spectra of *cis*-**3aa** via quantitative measurements of  $^{13}\text{C}$  peak intensities obtained from peak deconvolution and were calculated using the formula<sup>[3]</sup> shown below.

$$K_P = \frac{\ln(1 - F)}{\ln\left(1 - F\left(\frac{R_P}{R_0}\right)\right)}$$

Where  $F$  represents the fractional conversion of starting material to product and  $R$  represents the carbon peak intensity ratios of the target carbon versus the reference carbon peak (C4 in all cases).  $R_P$  is the peak ratio for *cis*-**3aa** at low conversion and  $R_0$  is the peak ratio for the fully converted *cis*-**3aa**.

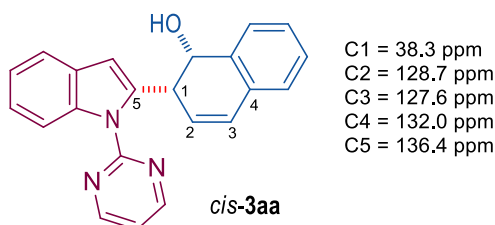

## SUPPLEMENTRAY INFORMATION

**Supplementary Table 1.**  $^{13}\text{C}$  Kinetic isotope effects sample 1. 25% conversion ( $F = 0.25$ )

| Entry | Carbon | $R_0$    | $R_P$    | $R_P/R_0$ | $^{13}\text{C}$ KIE |
|-------|--------|----------|----------|-----------|---------------------|
| 1     | 3      | 104.5221 | 102.4338 | 0.9800205 | 1.023(5)            |
| 2     | 2      | 103.3009 | 102.4946 | 0.9921946 | 1.009(2)            |
| 3     | 1      | 100.4979 | 100.5780 | 1.0007970 | 0.999(1)            |
| 4     | 5      | 102.8170 | 102.6153 | 0.9980383 | 1.002(3)            |
| 5     | 4      | 100.0000 | 100.0000 | 1         | 1.000               |

**Supplementary Table 2.**  $^{13}\text{C}$  Kinetic isotope Effects sample 2. 12% conversion ( $F = 0.12$ )

| Entry | Carbon | $R_0$    | $R_P$    | $R_P/R_0$ | $^{13}\text{C}$ KIE |
|-------|--------|----------|----------|-----------|---------------------|
| 1     | 3      | 104.5221 | 101.9446 | 0.9753401 | 1.027(0)            |
| 2     | 2      | 103.3009 | 101.8309 | 0.9857697 | 1.015(4)            |
| 3     | 1      | 100.4979 | 100.1539 | 0.9965770 | 1.003(7)            |
| 4     | 5      | 102.8170 | 102.6600 | 0.9984730 | 1.001(7)            |
| 5     | 4      | 100.0000 | 100.0000 | 1         | 1.000               |

**Supplementary Table 3.**  $^{13}\text{C}$  Kinetic isotope effects average of the 2 samples.

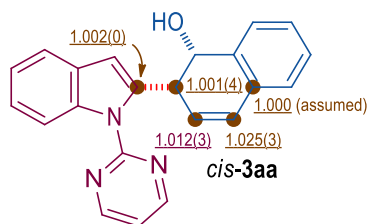

| Entry | Carbon | KIE 1    | KIE 2    | Average  |
|-------|--------|----------|----------|----------|
| 1     | 3      | 1.023(5) | 1.027(0) | 1.025(3) |
| 2     | 2      | 1.009(2) | 1.015(4) | 1.012(3) |
| 3     | 1      | 0.999(1) | 1.003(7) | 1.001(4) |
| 4     | 5      | 1.002(3) | 1.001(7) | 1.002(0) |
| 5     | 4      | 1.000    | 1.000    | 1.000    |

## SUPPLEMENTARY INFORMATION

### 1.5 Control experiment

(a) Rh-based catalysts are not effective in the current ARO reactions of 7-oxabenzonorbornadienes

The reactions between *7-oxabenzonorbornadiene* and indole were conducted under the optimized conditions of Li's work (Conditions 1 and 2. Ref. *Angew. Chem. Int. Ed.* **2019**, *58*, 322-326). *Cis-3aa* was not detected, and **1a** and **2a** were recovered. Besides, under our optimized conditions, when the Cp<sup>x</sup>Co was replaced by Cp<sup>x</sup>Rh (Conditions 3), the reaction did not occur either. These results demonstrated that the cobalt catalysts exhibit unique reactivity for ARO of 7-oxabenzonorbornadiene.

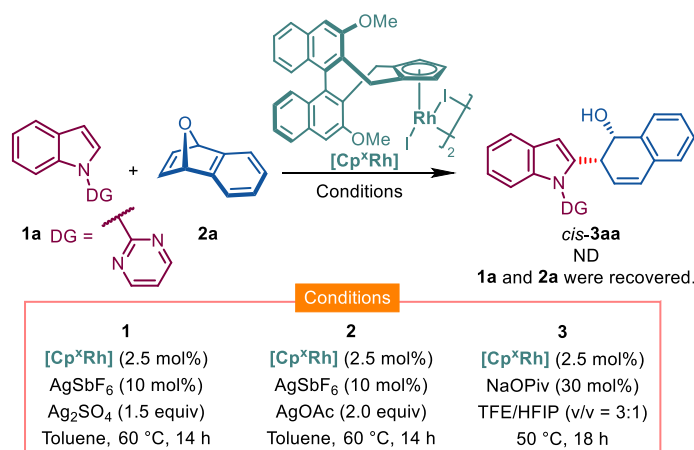

**Conditions 1:** A 10 mL sealed tube with a magnetic stir bar was charged with **1a** (78.1 mg, 0.40 mmol), **2a** (28.8 mg, 0.20 mmol), [Cp<sup>x</sup>Rh] (7.6 mg, 0.005 mmol), AgSbF<sub>6</sub> (6.9 mg, 0.020 mmol), Ag<sub>2</sub>SO<sub>4</sub> (93.5 mg, 0.30 mmol), toluene (4.0 mL) under argon atmosphere. The resulting mixture was stirred at 60 °C for 14 h. Then, the mixture was cooled to room temperature and diluted with EtOAc (25 mL), and filtered through a celite pad. The filter cake was washed with EtOAc (30 mL) and the combined filtrate was washed with H<sub>2</sub>O and brine. The organic layer was dried over Na<sub>2</sub>SO<sub>4</sub>, filtered and concentrated. Then the crude mixture was subjected to <sup>1</sup>H NMR analysis. **1a** and **2a** were recovered by column chromatography on silica gel (petroleum ether/ethyl acetate = 50/1 to 20/1).

**Conditions 2:** A 10 mL sealed tube with a magnetic stir bar was charged with **1a** (58.6 mg, 0.30 mmol), **2a** (28.8 mg, 0.20 mmol), [Cp<sup>x</sup>Rh] (7.6 mg, 0.005 mmol), AgSbF<sub>6</sub> (6.9 mg, 0.020 mmol), AgOAc (66.8 mg, 0.40 mmol), toluene (4.0 mL) under argon atmosphere. The resulting mixture was stirred at 60 °C for 14 h. Then, the mixture was cooled to room temperature and diluted with EtOAc (25 mL), and filtered through a celite pad. The filter cake was washed with EtOAc (30 mL) and the combined filtrate was washed with H<sub>2</sub>O and brine. The organic layer was dried over Na<sub>2</sub>SO<sub>4</sub>, filtered and concentrated. TLC indicated that no reaction occurred.

**Conditions 3:** A sealed tube with a magnetic stir bar was charged with **1a** (19.5 mg, 0.1 mmol), **2a** (21.6 mg, 0.15 mmol), [Cp<sup>x</sup>Rh] (3.8 mg, 0.0025 mmol), NaOPiv·H<sub>2</sub>O (4.4 mg, 0.030 mmol), TFE (0.3 mL) and HFIP (0.1 mL) under argon atmosphere. The mixture was stirred at 50 °C for 18 h. Afterwards, the mixture was cooled to room temperature and quenched by saturated NH<sub>4</sub>Cl aqueous solution (20 mL). The resulting mixture was extracted with ethyl acetate (3 × 15 mL). The combined organic phase was dried over anhydrous Na<sub>2</sub>SO<sub>4</sub> and filtered. TLC indicated that no reaction occurred.

## SUPPLEMENTARY INFORMATION

### (b) No post-coupling interconversion exists between the *cis*- and *trans*-products

The model reactions yielding *cis*-**3aa** and *trans*-**3aa** were conducted respectively (Supplementary Scheme 1a). Then the *cis*-**3aa** and *trans*-**3aa** were isolated in high yields with good diastereoselectivity (*cis*-**3aa**, 98% yield, 95:5 dr; *trans*-**3aa**, 95% yield, 90:10 dr). After that, *cis*-**3aa** or *trans*-**3aa** was tested under the conditions of *trans* (conditions **A**) or *cis* (conditions **B**), respectively. In both cases, **3aa** was mainly recovered with no change of their dr ratios (Supplementary Scheme 1b and Figure S7).

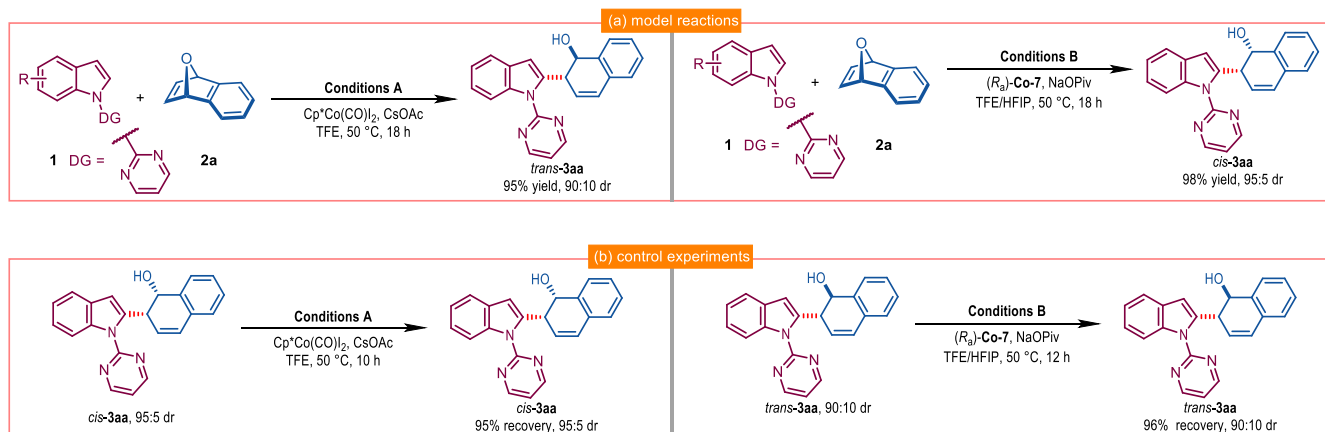

**Supplementary Scheme 1.** Control experiments, shown that no post-coupling interconversion exists between the *cis*- and *trans*-products. Conditions A:  $\text{Cp}^*\text{Co}(\text{CO})_2$  (0.005 mmol), CsOAc (0.03 mmol) in TFE (0.5 mL) at 50 °C for 10 h. Conditions B:  $(R_a)$ -Co-7 (0.005 mmol), NaOPiv·H<sub>2</sub>O (0.03 mmol) in TFE (0.3 mL) and HFIP (0.1 mL) at 50 °C for 12 h.

**Investigation of *cis*-**3aa** under Conditions A (Supplementary Scheme 1b, left):** A sealed tube with a magnetic stir bar was charged with *cis*-**3aa** (34.0 mg, 0.10 mmol),  $\text{Cp}^*\text{Co}(\text{CO})_2$  (2.4 mg, 0.005 mmol), CsOAc (5.8 mg, 0.03 mmol), TFE (0.5 mL) under argon atmosphere. The mixture was stirred at 50 °C for 10 h. Afterwards, the mixture was cooled to room temperature and quenched by saturated NH<sub>4</sub>Cl aqueous solution (20 mL). The resulting mixture was extracted with ethyl acetate (3 × 15 mL). The combined organic phase was dried over anhydrous Na<sub>2</sub>SO<sub>4</sub> and filtered. Then the crude mixture was subjected to <sup>1</sup>H NMR analysis. And *cis*-**3aa** was recovered by column chromatography on silica gel (petroleum ether/ethyl acetate = 4/1).

**Investigation of *trans*-**3aa** under Conditions B (Supplementary Scheme 1b, right):** A sealed tube with a magnetic stir bar was charged with *trans*-**3aa** (34.1 mg, 0.10 mmol),  $(R_a)$ -Co-7 (4.0 mg, 0.005 mmol), NaOPiv·H<sub>2</sub>O (4.4 mg, 0.03 mmol), TFE (0.3 mL) and HFIP (0.1 mL) under argon atmosphere. The mixture was stirred at 50 °C for 12 h. Afterwards, the mixture was cooled to room temperature and quenched by saturated NH<sub>4</sub>Cl aqueous solution (20 mL). The resulting mixture was extracted with ethyl acetate (3 × 15 mL). The combined organic phase was dried over anhydrous Na<sub>2</sub>SO<sub>4</sub> and filtered. Then the crude mixture was subjected to <sup>1</sup>H NMR analysis. And *trans*-**3aa** was recovered by column chromatography on silica gel (petroleum ether/ethyl acetate = 4/1).

# SUPPLEMENTRAY INFORMATION

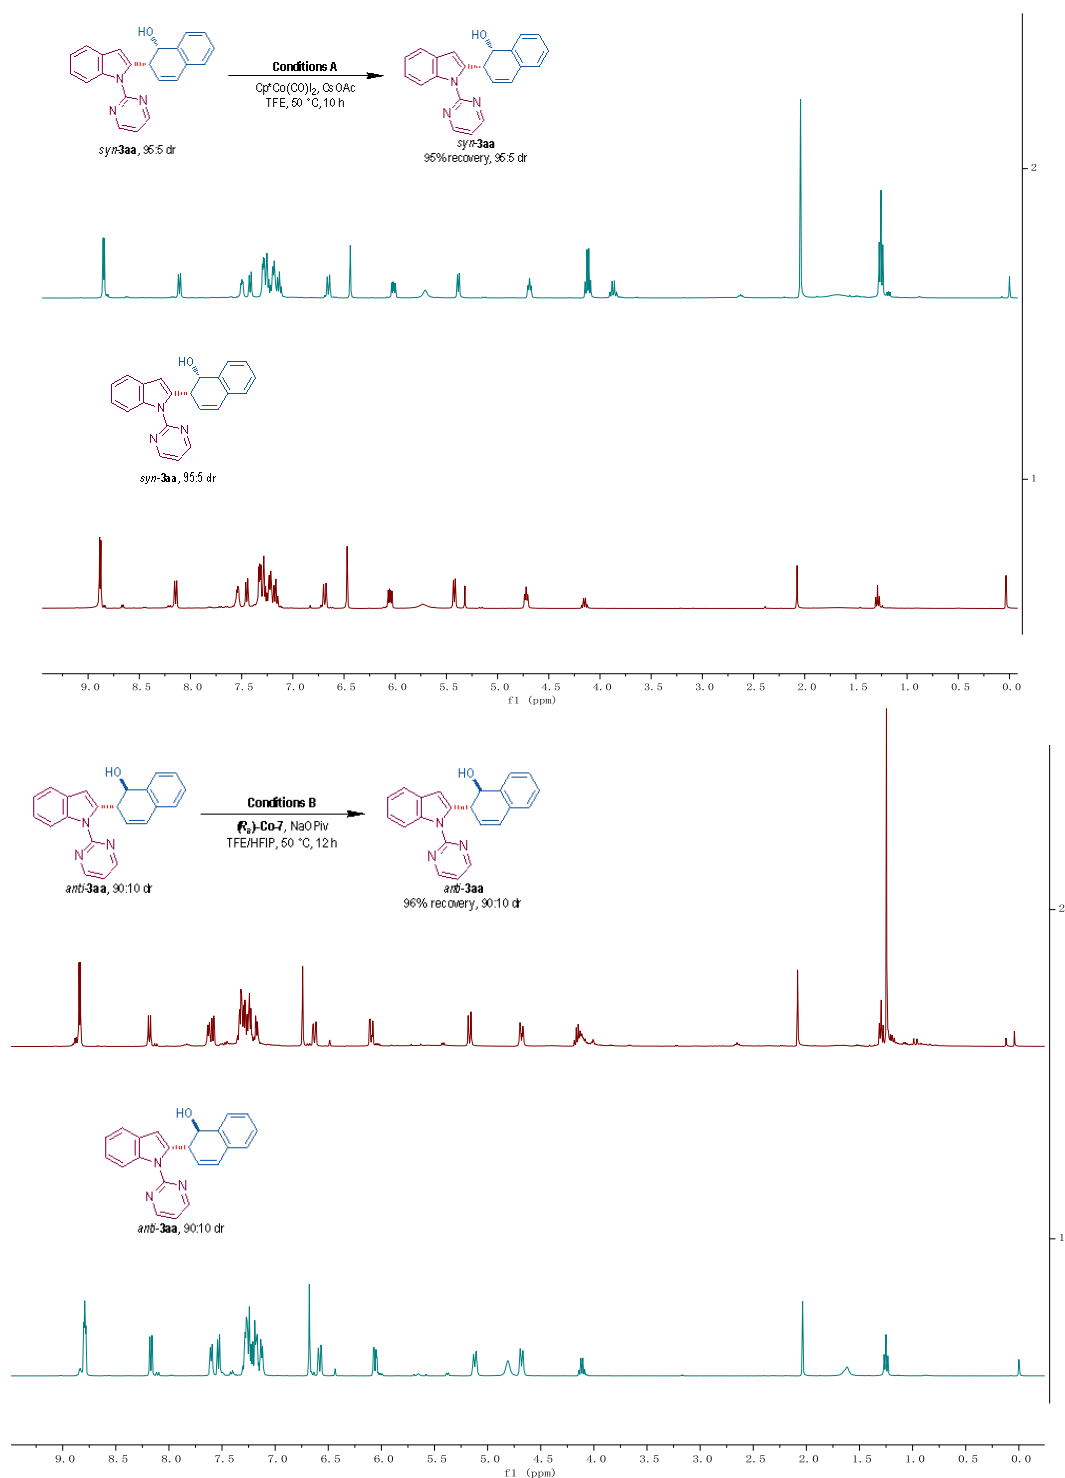

**Supplementary Fig. 7**  $^1\text{H}$  NMR spectra of the crude mixtures (control experiments). Conditions A:  $\text{Cp}^*\text{Co}(\text{Co})\text{I}_2$  (0.005 mmol), CsOAc (0.03 mmol) in TFE (0.5 mL) at 50 °C for 10 h. Conditions B:  $(R_a)\text{-Co-7}$  (0.005 mmol), NaOPiv·H<sub>2</sub>O (0.03 mmol) in TFE (0.3 mL) and HFIP (0.1 mL) at 50 °C for 12 h.

## SUPPLEMENTARY INFORMATION

### 1.6 X-Ray crystal structures

(a) X-ray crystal structure of *trans*-3da

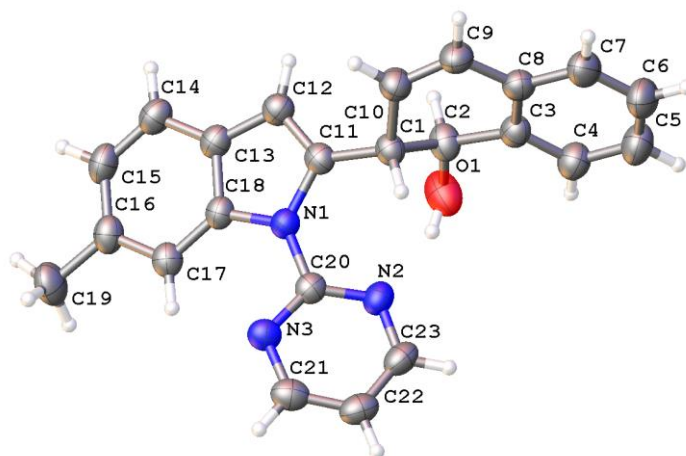

**Supplementary Fig. 8** The X-ray crystal structure of enantiopure *trans*-3da with thermal ellipsoids at the 30% probability level (CCDC: 2164324).

**Supplementary Table 4.** Crystal data and structure refinement for mj21175\_0m.

|                                 |                                                  |                  |
|---------------------------------|--------------------------------------------------|------------------|
| Identification code             | mj21175_0m                                       |                  |
| Empirical formula               | C <sub>23</sub> H <sub>19</sub> N <sub>3</sub> O |                  |
| Formula weight                  | 353.41                                           |                  |
| Temperature                     | 173.01 K                                         |                  |
| Wavelength                      | 1.34139 Å                                        |                  |
| Crystal system                  | Monoclinic                                       |                  |
| Space group                     | C 1 2/c 1                                        |                  |
| Unit cell dimensions            | a = 26.557(3) Å                                  | α = 90°.         |
|                                 | b = 7.0049(9) Å                                  | β = 107.253(7)°. |
|                                 | c = 20.726(3) Å                                  | γ = 90°.         |
| Volume                          | 3682.0(8) Å <sup>3</sup>                         |                  |
| Z                               | 8                                                |                  |
| Density (calculated)            | 1.275 Mg/m <sup>3</sup>                          |                  |
| Absorption coefficient          | 0.405 mm <sup>-1</sup>                           |                  |
| F(000)                          | 1488                                             |                  |
| Crystal size                    | 0.05 x 0.03 x 0.01 mm <sup>3</sup>               |                  |
| Theta range for data collection | 3.886 to 55.119°.                                |                  |
| Index ranges                    | -32 ≤ h ≤ 32, -8 ≤ k ≤ 7, -25 ≤ l ≤ 20           |                  |
| Reflections collected           | 15700                                            |                  |
| Independent reflections         | 3519 [R(int) = 0.0893]                           |                  |
| Completeness to theta = 53.594° | 99.9 %                                           |                  |
| Absorption correction           | Semi-empirical from equivalents                  |                  |
| Max. and min. transmission      | 0.7508 and 0.3677                                |                  |
| Refinement method               | Full-matrix least-squares on F <sup>2</sup>      |                  |

## SUPPLEMENTARY INFORMATION

---

|                                      |                                       |
|--------------------------------------|---------------------------------------|
| Data / restraints / parameters       | 3519 / 0 / 246                        |
| Goodness-of-fit on $F^2$             | 1.066                                 |
| Final R indices [ $I > 2\sigma(I)$ ] | R1 = 0.0841, wR2 = 0.2277             |
| R indices (all data)                 | R1 = 0.1280, wR2 = 0.2665             |
| Extinction coefficient               | n/a                                   |
| Largest diff. peak and hole          | 0.505 and -0.278 e. $\text{\AA}^{-3}$ |



## SUPPLEMENTARY INFORMATION

### (b) X-ray crystal structure of enantiopure *cis*-3da

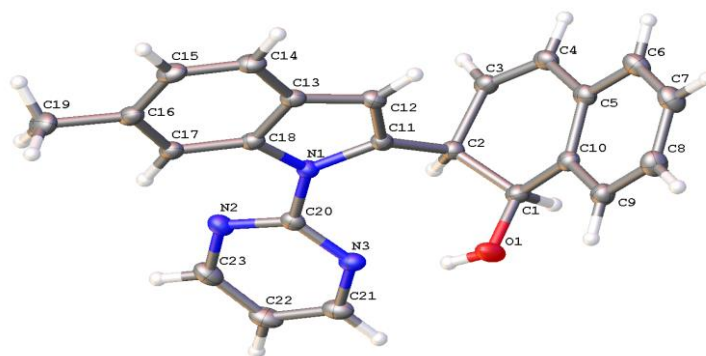

**Supplementary Fig. 9** The X-ray crystal structure of enantiopure *cis*-3da with thermal ellipsoids at the 30% probability level (CCDC: 2164323).

**Supplementary Table 5.** Crystal data and structure refinement for mj21150\_0m.

|                                   |                                                  |          |
|-----------------------------------|--------------------------------------------------|----------|
| Identification code               | mj21150_0m                                       |          |
| Empirical formula                 | C <sub>23</sub> H <sub>19</sub> N <sub>3</sub> O |          |
| Formula weight                    | 353.41                                           |          |
| Temperature                       | 173.01 K                                         |          |
| Wavelength                        | 1.34139 Å                                        |          |
| Crystal system                    | Orthorhombic                                     |          |
| Space group                       | P2 <sub>1</sub> 2 <sub>1</sub> 2 <sub>1</sub>    |          |
| Unit cell dimensions              | a = 7.0927(2) Å                                  | α = 90°. |
|                                   | b = 13.5847(3) Å                                 | β = 90°. |
|                                   | c = 18.5402(5) Å                                 | γ = 90°. |
| Volume                            | 1786.39(8) Å <sup>3</sup>                        |          |
| Z                                 | 4                                                |          |
| Density (calculated)              | 1.314 Mg/m <sup>3</sup>                          |          |
| Absorption coefficient            | 0.418 mm <sup>-1</sup>                           |          |
| F(000)                            | 744                                              |          |
| Crystal size                      | 0.1 x 0.08 x 0.05 mm <sup>3</sup>                |          |
| Theta range for data collection   | 5.025 to 55.035°.                                |          |
| Index ranges                      | -8 ≤ h ≤ 7, -16 ≤ k ≤ 16, -22 ≤ l ≤ 22           |          |
| Reflections collected             | 20323                                            |          |
| Independent reflections           | 3404 [R(int) = 0.0540]                           |          |
| Completeness to theta = 53.594°   | 99.4 %                                           |          |
| Absorption correction             | Semi-empirical from equivalents                  |          |
| Max. and min. transmission        | 0.7508 and 0.5671                                |          |
| Refinement method                 | Full-matrix least-squares on F <sup>2</sup>      |          |
| Data / restraints / parameters    | 3404 / 0 / 246                                   |          |
| Goodness-of-fit on F <sup>2</sup> | 1.052                                            |          |
| Final R indices [I > 2σ(I)]       | R1 = 0.0304, wR2 = 0.0760                        |          |

## SUPPLEMENTARY INFORMATION

---

|                              |                                    |
|------------------------------|------------------------------------|
| R indices (all data)         | R1 = 0.0315, wR2 = 0.0769          |
| Absolute structure parameter | 0.06(12)                           |
| Extinction coefficient       | n/a                                |
| Largest diff. peak and hole  | 0.122 and -0.152 e.Å <sup>-3</sup> |

## SUPPLEMENTARY INFORMATION

### (c) X-ray crystal structure of enantiopure *trans-7ab'*

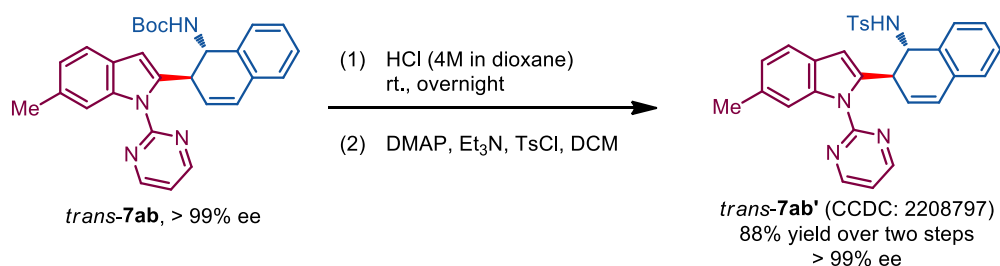

**Conditions 1:** A 4 mL vial with a magnetic stir bar was charged with *trans-7ab* (49.2 mg, 95:5 dr, >99% ee, 0.11 mmol) and HCl (2.0 mL, 4 mol/L in dioxane). The resulting mixture was stirred at room temperature for overnight. The reaction mixture was quenched by saturated Na<sub>2</sub>CO<sub>3</sub> aqueous solution (30 mL). The resulting mixture was extracted with DCM (3 × 15 mL). The combined organic phase was dried over anhydrous Na<sub>2</sub>SO<sub>4</sub>, filtered and concentrated, giving the amine as white solid used in the next step without further purification.

**Conditions 2:** A 10 mL round-bottomed flask with a magnetic stir bar was charged with aforementioned amine (35.2 mg), *p*-toluenesulfonyl chloride (TsCl, 22.9 mg, 0.12 mmol), Et<sub>3</sub>N (83 μL, 0.60 mmol), DMAP (12.0 mg, 0.10 mmol) and DCM (2.0 mL). The resulting mixture was stirred at room temperature for 12 h. After the reaction was complete, the solvent was removed by a rotary evaporator. The residue was purified by column chromatography on silica gel (petroleum ether/ethyl acetate = 8/1 to 4/1) to afford *trans-7ab'* (45.6 mg, 88% yield over two steps).

*trans-7ab'*, white solid. <sup>1</sup>H NMR (400 MHz, CDCl<sub>3</sub>) δ 8.89 (d, *J* = 4.8 Hz, 2H), 8.06 (d, *J* = 6.4 Hz, 1H), 7.83 (s, 1H), 7.72 (d, *J* = 7.2 Hz, 1H), 7.28 (t, *J* = 5.2 Hz, 2H), 7.26-7.23 (m, 1H), 7.19 (d, *J* = 8.4 Hz, 2H), 7.13 (d, *J* = 8.0 Hz, 1H), 7.10-7.04 (m, 1H), 6.99 (d, *J* = 8.0 Hz, 1H), 6.57 (d, *J* = 8.0 Hz, 2H), 6.50 (dd, *J* = 9.6, 2.4 Hz, 1H), 6.16 (s, 1H), 5.88 (dd, *J* = 9.6, 2.8 Hz, 1H), 4.78 (dd, *J* = 12.0, 6.4 Hz, 1H), 4.49 (dt, *J* = 12.0, 2.8 Hz, 1H), 2.50 (s, 3H), 2.12 (s, 3H). <sup>13</sup>C NMR (100 MHz, CDCl<sub>3</sub>) δ 158.8, 157.1, 142.4, 139.6, 137.2, 136.7, 135.7, 133.1, 132.9, 131.2, 129.0, 128.3, 128.0, 127.97, 127.3, 127.1, 126.3, 126.1, 123.8, 120.1, 117.9, 113.4, 107.4, 59.7, 39.1, 22.2, 21.7. IR (thin film): ν<sub>max</sub> (cm<sup>-1</sup>) = 2955, 2919, 2850, 1732, 1645, 1564, 1486, 1425, 1379, 1332, 1261, 1185, 1155, 1118, 1092, 1021, 955, 915, 872, 809, 758, 725, 697, 663.

HRMS (ESI) calcd for C<sub>30</sub>H<sub>26</sub>O<sub>2</sub>N<sub>4</sub>SNa [M+Na]<sup>+</sup>: 529.1674. Found: 529.1663.

HPLC conditions: Chiralcel AD-H column (4.6 mm × 250 mm), hexane/*i*-PrOH, 70:30 v/v, flow rate = 1.0 mL/min, λ = 254 nm, 25 °C. t<sub>R</sub> (major) = 10.35 min, t<sub>R</sub> (minor) = 14.45 min, ee > 99%. [α]<sub>D</sub><sup>33</sup> = -97.1 (c = 0.1, CHCl<sub>3</sub>).

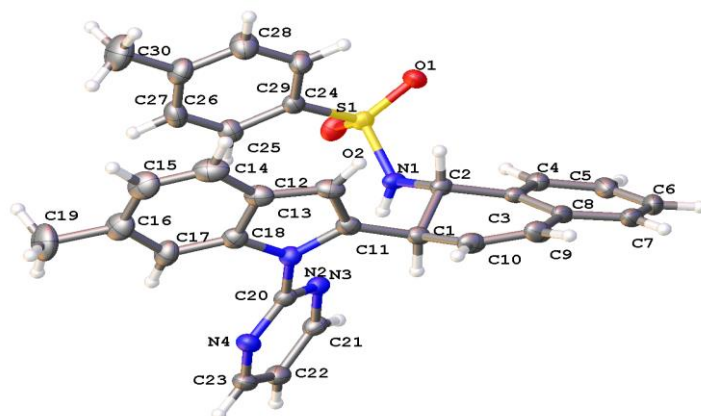

**Supplementary Fig. 10** The X-ray crystal structure of enantiopure *trans-7ab'* with thermal ellipsoids at the 30% probability level (CCDC: 2208797).

### Supplementary Table 6. Crystal data and structure refinement for mj22376\_0m.

|                     |                                                                 |
|---------------------|-----------------------------------------------------------------|
| Identification code | mj22376_0m                                                      |
| Empirical formula   | C <sub>30</sub> H <sub>26</sub> N <sub>4</sub> O <sub>2</sub> S |

## SUPPLEMENTARY INFORMATION

---

|                                   |                                             |                  |
|-----------------------------------|---------------------------------------------|------------------|
| Formula weight                    | 506.61                                      |                  |
| Temperature                       | 213.00 K                                    |                  |
| Wavelength                        | 1.34139 Å                                   |                  |
| Crystal system                    | Monoclinic                                  |                  |
| Space group                       | P 1 21 1                                    |                  |
| Unit cell dimensions              | a = 10.7690(3) Å                            | a = 90°.         |
|                                   | b = 12.6152(3) Å                            | b = 118.946(2)°. |
|                                   | c = 11.0758(3) Å                            | g = 90°.         |
| Volume                            | 1316.71(6) Å <sup>3</sup>                   |                  |
| Z                                 | 2                                           |                  |
| Density (calculated)              | 1.278 Mg/m <sup>3</sup>                     |                  |
| Absorption coefficient            | 0.888 mm <sup>-1</sup>                      |                  |
| F(000)                            | 532                                         |                  |
| Crystal size                      | 0.07 x 0.07 x 0.05 mm <sup>3</sup>          |                  |
| Theta range for data collection   | 4.090 to 55.015°.                           |                  |
| Index ranges                      | -12<=h<=13, -15<=k<=15, -13<=l<=13          |                  |
| Reflections collected             | 19336                                       |                  |
| Independent reflections           | 4984 [R(int) = 0.0595]                      |                  |
| Completeness to theta = 53.594°   | 99.7 %                                      |                  |
| Absorption correction             | Semi-empirical from equivalents             |                  |
| Max. and min. transmission        | 0.7508 and 0.5495                           |                  |
| Refinement method                 | Full-matrix least-squares on F <sup>2</sup> |                  |
| Data / restraints / parameters    | 4984 / 1 / 336                              |                  |
| Goodness-of-fit on F <sup>2</sup> | 1.042                                       |                  |
| Final R indices [I>2sigma(I)]     | R1 = 0.0506, wR2 = 0.1222                   |                  |
| R indices (all data)              | R1 = 0.0756, wR2 = 0.1360                   |                  |
| Absolute structure parameter      | 0.044(13)                                   |                  |
| Extinction coefficient            | n/a                                         |                  |
| Largest diff. peak and hole       | 0.639 and -0.376 e.Å <sup>-3</sup>          |                  |

## SUPPLEMENTARY INFORMATION

### 1.7 Absolute configuration of *cis*-7

(a) Reported results (Ref. [12], *Angew. Chem. Int. Ed.* 2019, 58, 322-326).

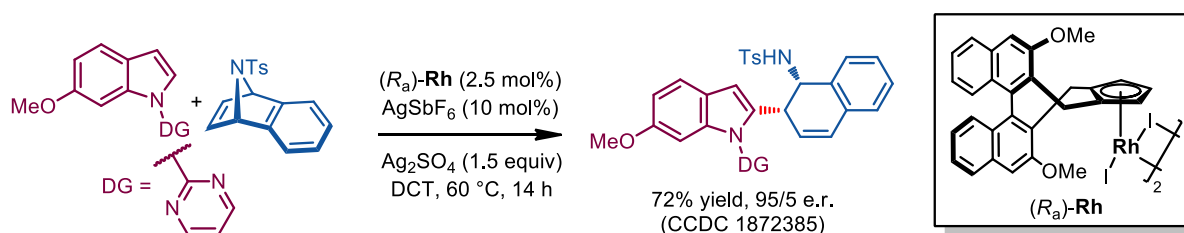

In Ref. [12], HPLC conditions: Chiralcel AD–H, hexane/*i*-PrOH, 70:30 v/v, flow rate = 1.0 mL/min,  $\lambda = 254$  nm, 40 °C.  $t_R$  (minor) = 10.43 min,  $t_R$  (major) = 12.73 min, ee = 90%.  $[\alpha]_D^{20} = -98.07$  ( $c = 0.2$ ,  $\text{CH}_2\text{Cl}_2$ ).

(b) Conditions in this work for the synthesis of *cis*-7gb.

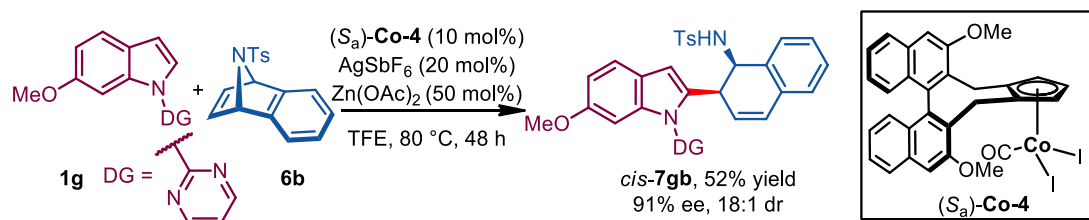

*cis*-7gb, 27.2 mg, 52% yield, pale yellow foam.  $^1\text{H NMR}$  (400 MHz,  $\text{CDCl}_3$ ) 8.74 (d,  $J = 4.8$  Hz, 2H), 7.88 (d,  $J = 2.4$  Hz, 1H), 7.43 (d,  $J = 7.2$  Hz, 1H), 7.32-7.21 (m, 5H), 7.19-7.10 (m, 2H), 6.85 (dd,  $J = 8.4, 2.4$  Hz, 1H), 6.67 (d,  $J = 8.0$  Hz, 2H), 6.61 (dd,  $J = 9.6, 2.4$  Hz, 1H), 6.35 (s, 1H), 6.11 (dd,  $J = 9.6, 3.6$  Hz, 1H), 5.41 (d,  $J = 8.8$  Hz, 1H), 5.11 (dd,  $J = 8.8, 6.0$  Hz, 1H), 4.82 (dt,  $J = 5.6, 2.8$  Hz, 1H), 3.89 (s, 3H), 2.14 (s, 3H). The analytical data is in accordance with the previous report.<sup>[12]</sup>

HPLC conditions: Chiralcel AD–H column (4.6 mm  $\times$  250 mm), hexane/*i*-PrOH, 70:30 v/v, flow rate = 1.0 mL/min,  $\lambda = 254$  nm, 25 °C.  $t_R$  (major) = 12.31 min,  $t_R$  (minor) = 16.44 min, ee = 91%.  $[\alpha]_D^{26} = +97.5$  ( $c = 0.2$ ,  $\text{CH}_2\text{Cl}_2$ ).

## 1.8 Computational calculations

### Computational methods.

All the computational works were performed with Gaussian16<sup>[4]</sup> or ORCA 4.1.0 packages.<sup>[5]</sup> DFT calculations were carried out using the B3LYP-D3(BJ) functional<sup>[6]</sup> including the D3 version of Grimme's empirical dispersion correction with Becke–Johnson damping.<sup>[7]</sup> The def2-SVP basis sets<sup>[8]</sup> were applied for all atoms. Optimizations were conducted without any constraint in gas phase. Frequency analyses were carried out to confirm each structure being a minimum (no imaginary frequency) or a transition state (only one imaginary frequency). Single-point calculations with RI-PWPB95-D3(BJ) method and def2-TZVPP basis sets (with auxiliary basis sets def2-TZVPP/C<sup>[9]</sup> and def2/JK<sup>[10]</sup>) were performed using the geometries obtained at the B3LYP-D3(BJ)/def2-SVP level of theory. The calculated structures were visualized with VMD 1.9.3.<sup>[11]</sup>

**Reaction pathway involving chiral CpCo catalyst.** The reaction of N-pyrimidinylindole (**1a**) and 7-oxabenzonorbornadiene (**2a**) catalyzed by the chiral CpCo complex with pivalate anion was considered (Figure S12). The cationic Co-complex with **1a** was set as zero-point of the potential energy surface (**INT-0**, 0.0 kcal/mol). In this complex, **1a** was coordinated to the Co center with the nitrogen atom of the pyrimidine moiety. The indole C–H cleavage proceeded via a well-recognized six-membered-ring concerted metallation deprotonation (CMD) transition state **TS-1** (8.8 kcal/mol). The Co–C bond formation [B(Co–C) = 2.03 Å] and the concomitant proton transfer to the ligated pivalate anion [B(C1–H) = 1.24 Å and B(O2–H) = 1.41 Å] gave rise to the cyclometallated intermediate **INT-1** (-3.9 kcal/mol). Then, the pivalic acid was replaced by **2a**, leading to intermediate **INT-2** (0.5 kcal/mol) in which a hydrogen bond was formed between the pivalic acid and the oxygen atom of **2a**. Subsequently, the migratory insertion of the Co–C bond into the olefin moiety of **2a** proceeded via transition state **TS-2** (6.4 kcal/mol), which yielded intermediate **INT-3** (2.6 kcal/mol). The following  $\beta$ -oxygen elimination was the enantioselectivity and diastereoselectivity-determining step of the whole reaction. Among the transition states leading to all possible isomers (Figure S12), the one corresponding to the generation of (1*S*,2*R*)-*cis*-**3aa** was energetically the most favorable [**TS-*cis*-SR**, 13.7 kcal/mol, named as **TS-*cis*-SR** in the main text], which well reproduced the predominate formation of this isomer experimentally. Notably, its energy was much higher than those of **TS-1** and **TS-2**, thus making the previous C–H cleavage and olefin insertion steps reversible, which was consistent with the deuterium-labelling experiment. Meanwhile, this C=C and Co–O bond-formation process was highly exergonic, leading to **INT-4** with rather low energy (-22.1 kcal/mol) and the irreversibly established of the chirality of product. On the contrary, the transition state leading to the opposite enantiomer (1*R*,2*S*)-*cis*-**3aa** was also located [**TS-3-*cis*-RS**, 21.8 kcal/mol, named as **TS-3-*cis*-RS** in the main text], whose energy was much higher than that of **TS-3-*cis*-SR** by 8.1 kcal/mol. Stronger steric repulsion was observed for **TS-3-*cis*-RS**, which was exemplified by short H–H distances (less than 2.20 Å) between 7-oxabenzonorbornadiene and the tert-butyl group of the catalyst. On the other hand, the energies of the transition states for the formation of the other diastereoisomers of the products (*trans*-**3aa**) are even higher [**TS-3-*trans*-RR**, 21.5 kcal/mol and **TS-3-*trans*-SS**, 22.3 kcal/mol]. Higher degree of charge separation was observed in these two transition states compared with those in **TS-*cis*-SR** and **TS-3-*cis*-RS** because the Co–O interaction was absence in **TS-3-*trans*-RR** and **TS-3-*trans*-SS**.

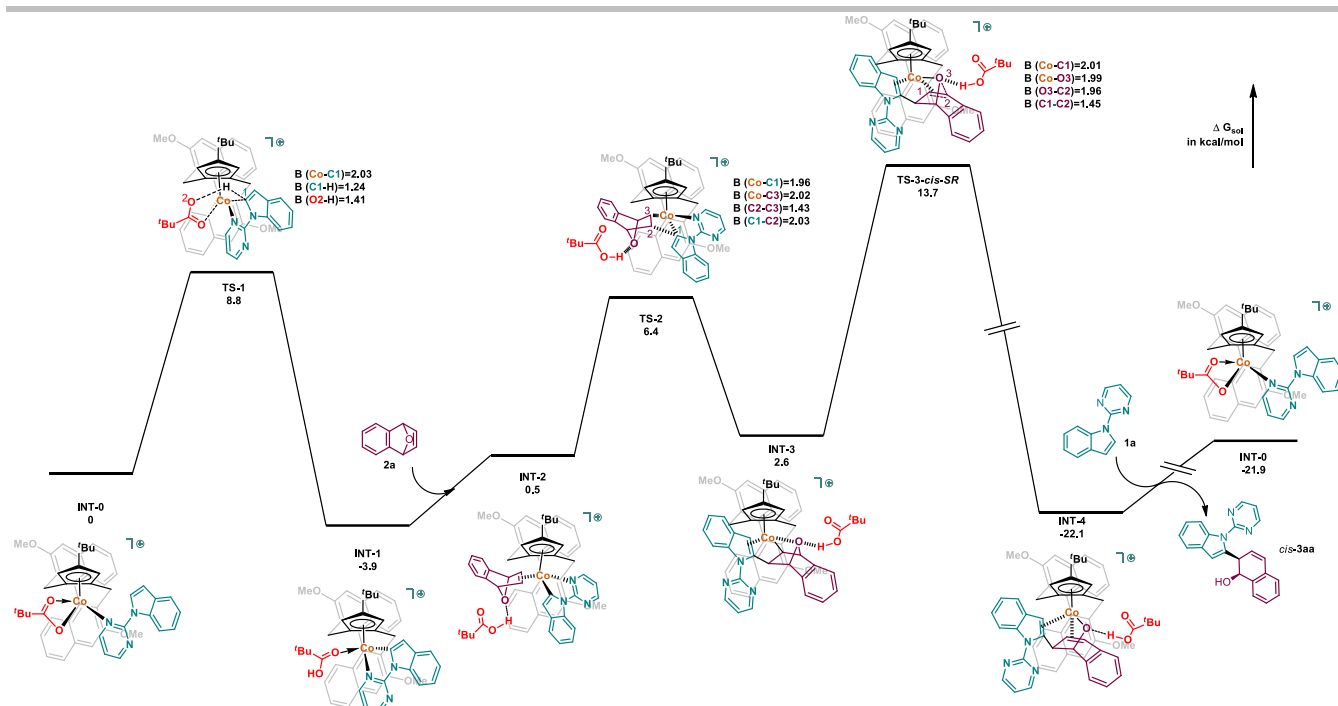

**Supplementary Fig. 11** The profile of the alternative reaction pathway involving chiral CpCo catalyst calculated at the PWPB95-D3(BJ)/def2-TZVPP (SMD, TFE)//B3LYP-D3(BJ)/def2-SVP (gas) level of theory. The relative Gibbs free energies ( $\Delta G_{sol}$ ) are in kcal/mol. The distances of forming/cleaving bonds are in Å.

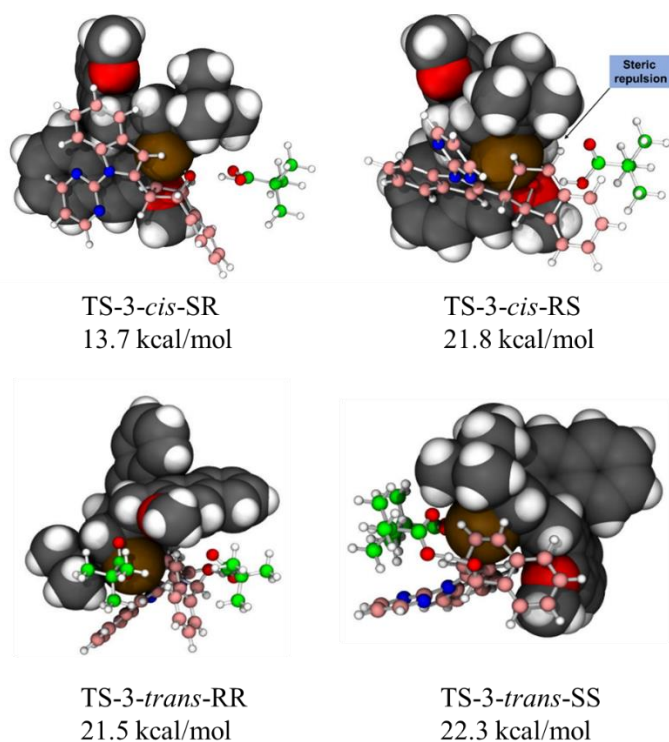

**Supplementary Fig. 12** Optimized structures of key  $\beta$ -oxygen elimination transition states. Calculated at the PWPB95-D3(BJ)/def2-TZVPP (SMD, TFE)//B3LYP-D3(BJ)/def2-SVP (gas) level of theory. The cyclopentadienyl ligands are presented in the van der Waals model. The cobalt center and the substrates are shown in the ball-and-stick model. The relative Gibbs free energies ( $\Delta G_{sol}$ ) are represented in kcal/mol. The bond distances are presented in Å.

**Reaction pathway involving  $Cp^*Co(CO)_2$  as the catalyst.** When  $Cp^*Co(CO)_2$  was employed as the catalyst, racemic *trans*-**3aa** became the major product (10:90 *trans/cis*, entry1 in Table 1 in the main text). The energy profile for the reaction between **1a** and **2a** catalyzed by the  $Cp^*Co$  catalyst was considered (Figure S13). Starting from complex **INT-0'** (0.0 kcal/mol), the C–H activation of **1a** proceeded via transition state **TS-1'** (12.8 kcal/mol) in which

## SUPPLEMENTARY INFORMATION

an acetate anion worked as the internal base [ $B(\text{C}1-\text{H}) = 1.24 \text{ \AA}$  and  $B(\text{O}1-\text{H}) = 1.39 \text{ \AA}$ ], leading to cyclometallated complex **INT-1'** (2.6 kcal/mol). The formed acetic acid was next replaced by **2a** via *endo*- or *exo*-coordination to yield intermediates **INT-2'-trans** (10.5 kcal/mol) or **INT-2'-cis** (-1.4 kcal/mol). In both cases, a hydrogen bond was formed between the acetic acid and **2a**. Migratory insertion of C–Co bond into the olefin moiety of **2a** proceeded via transition states **TS-2'-trans** (19.3 kcal/mol) or **TS-2'-cis** (8.8 kcal/mol) in which the Co center was located in the opposite or the same side of the oxygen bridge in **2a**. It should be mentioned that the Cp\* ligand is sterically less hindered compared with the chiral Cp ligand used in the enantioselective reaction. Thus, an additional acetate anion could coordinate to the Co center in the following *anti*- $\beta$ -oxygen elimination transition state [**TS-3'-trans**, 19.4 kcal/mol, named as **TS-trans-rac** in the main text] from intermediate **INT-4'-trans** (2.2 kcal/mol). This stabilizing effect made **TS-3'-trans** energetically more favorable than the transition state of *cis*- $\beta$ -oxygen elimination [**TS-3'-cis**, 22.6 kcal/mol, named as **TS-cis-rac** in the main text]. Finally, *trans*-**3aa** was released from intermediate **INT-5'-trans** (-5.5 kcal/mol).

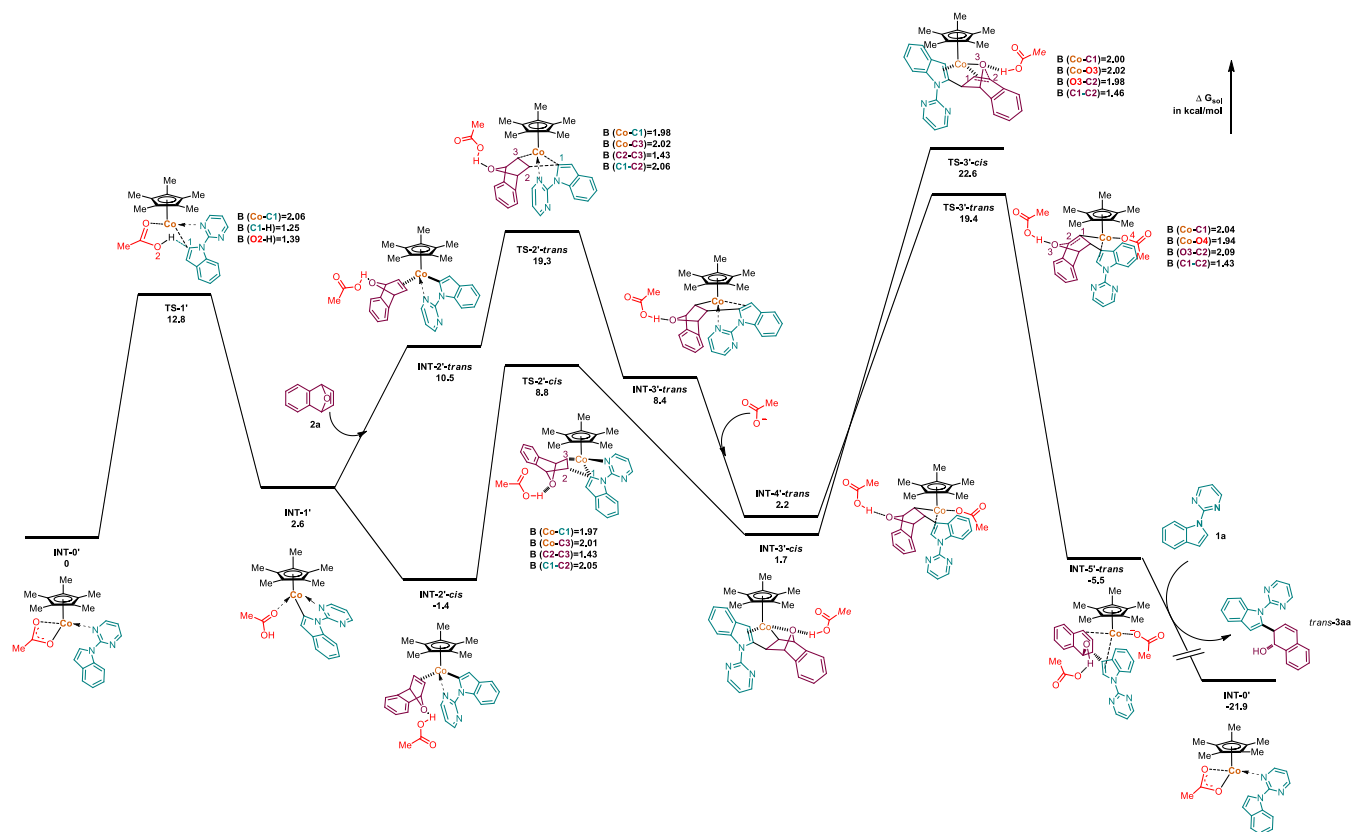

**Supplementary Fig. 13** The profile of the alternative reaction pathway involving  $\text{Cp}^*\text{Co}(\text{CO})\text{I}_2$  catalyst calculated at the PWPB95-D3(BJ)/def2-TZVPP (SMD, TFE)//B3LYP-D3(BJ)/def2-SVP (gas) level of theory. The relative Gibbs free energies ( $\Delta G_{\text{so}}^{\ddagger}$ ) are in kcal/mol. The distances of forming/cleaving bonds are in Å.



# SUPPLEMENTARY INFORMATION

## 1.9 Copies of NMR spectra

Supplementary Fig. 14  $^1\text{H}$  NMR Spectrum of *trans*-3aa

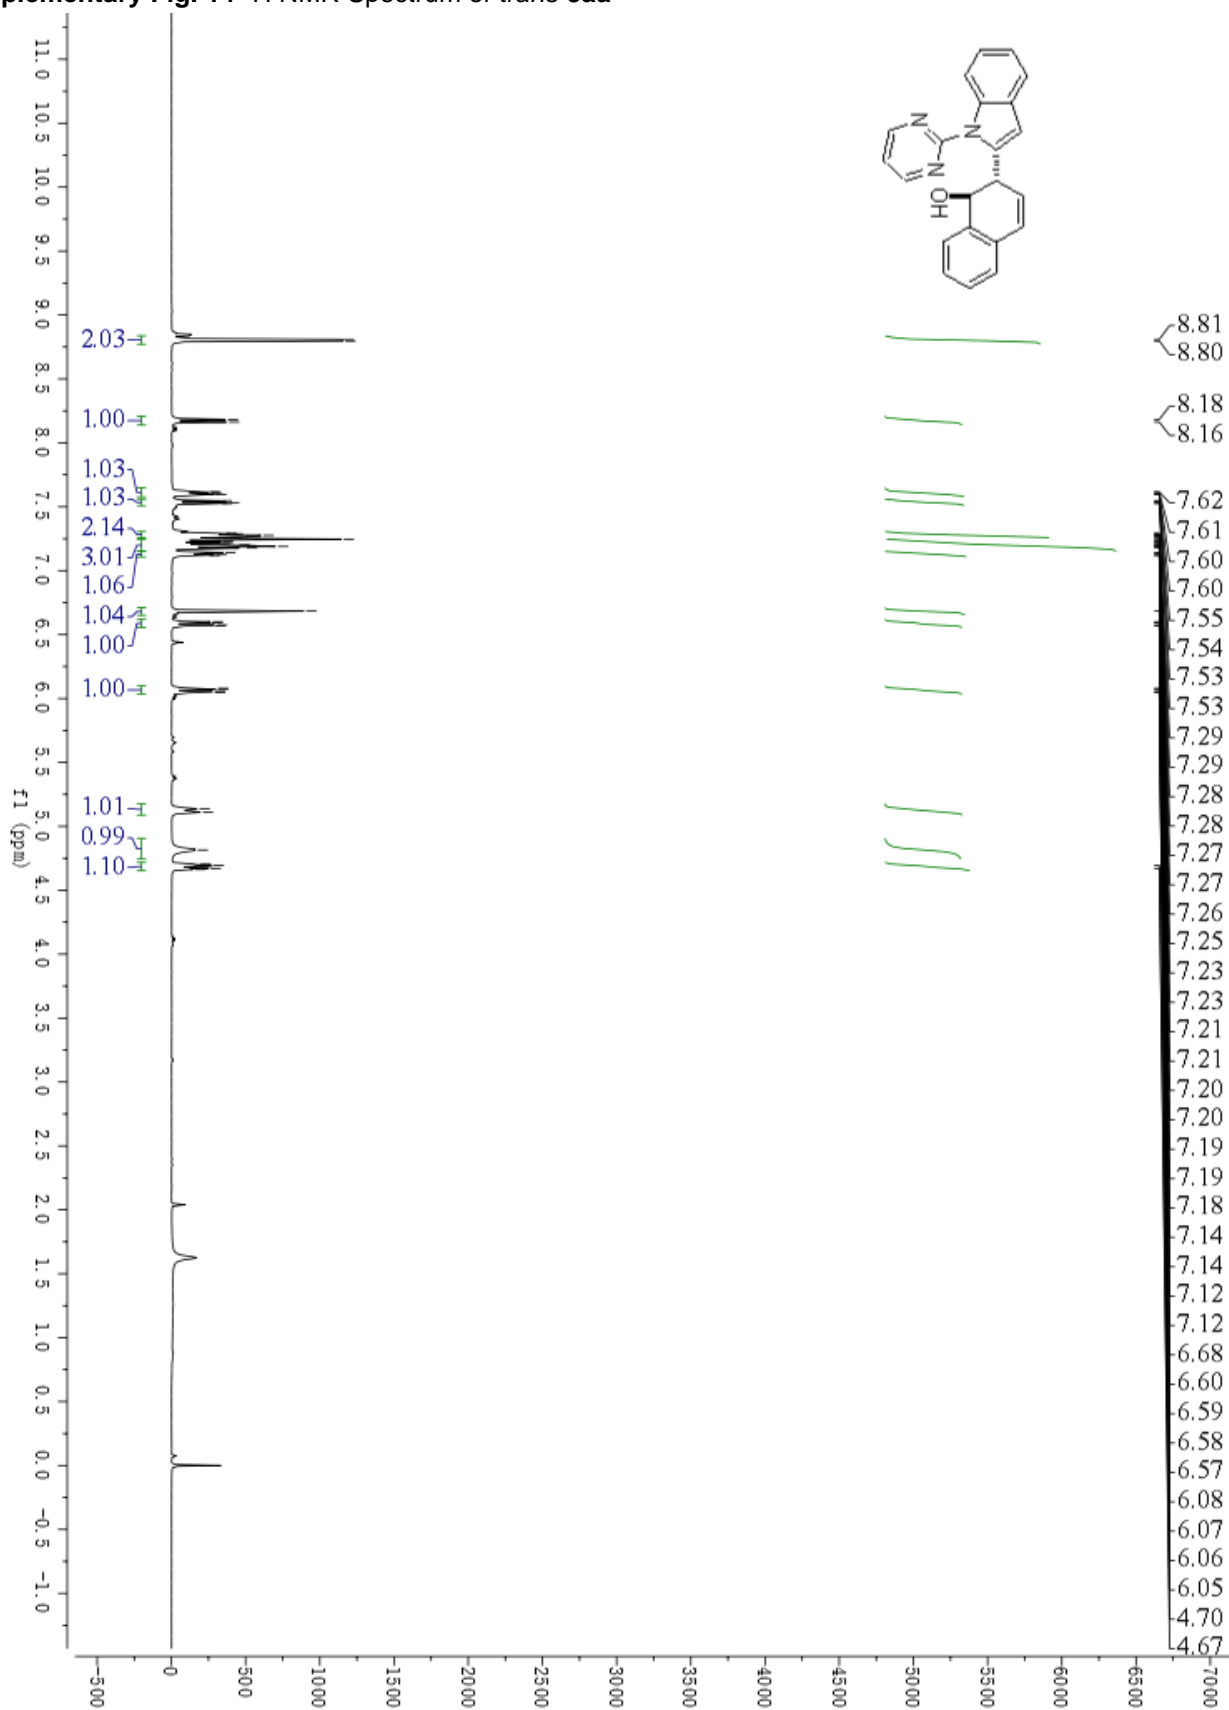

# SUPPLEMENTARY INFORMATION

**Supplementary Fig. 15**  $^{13}\text{C}$  NMR Spectrum of *trans*-3aa

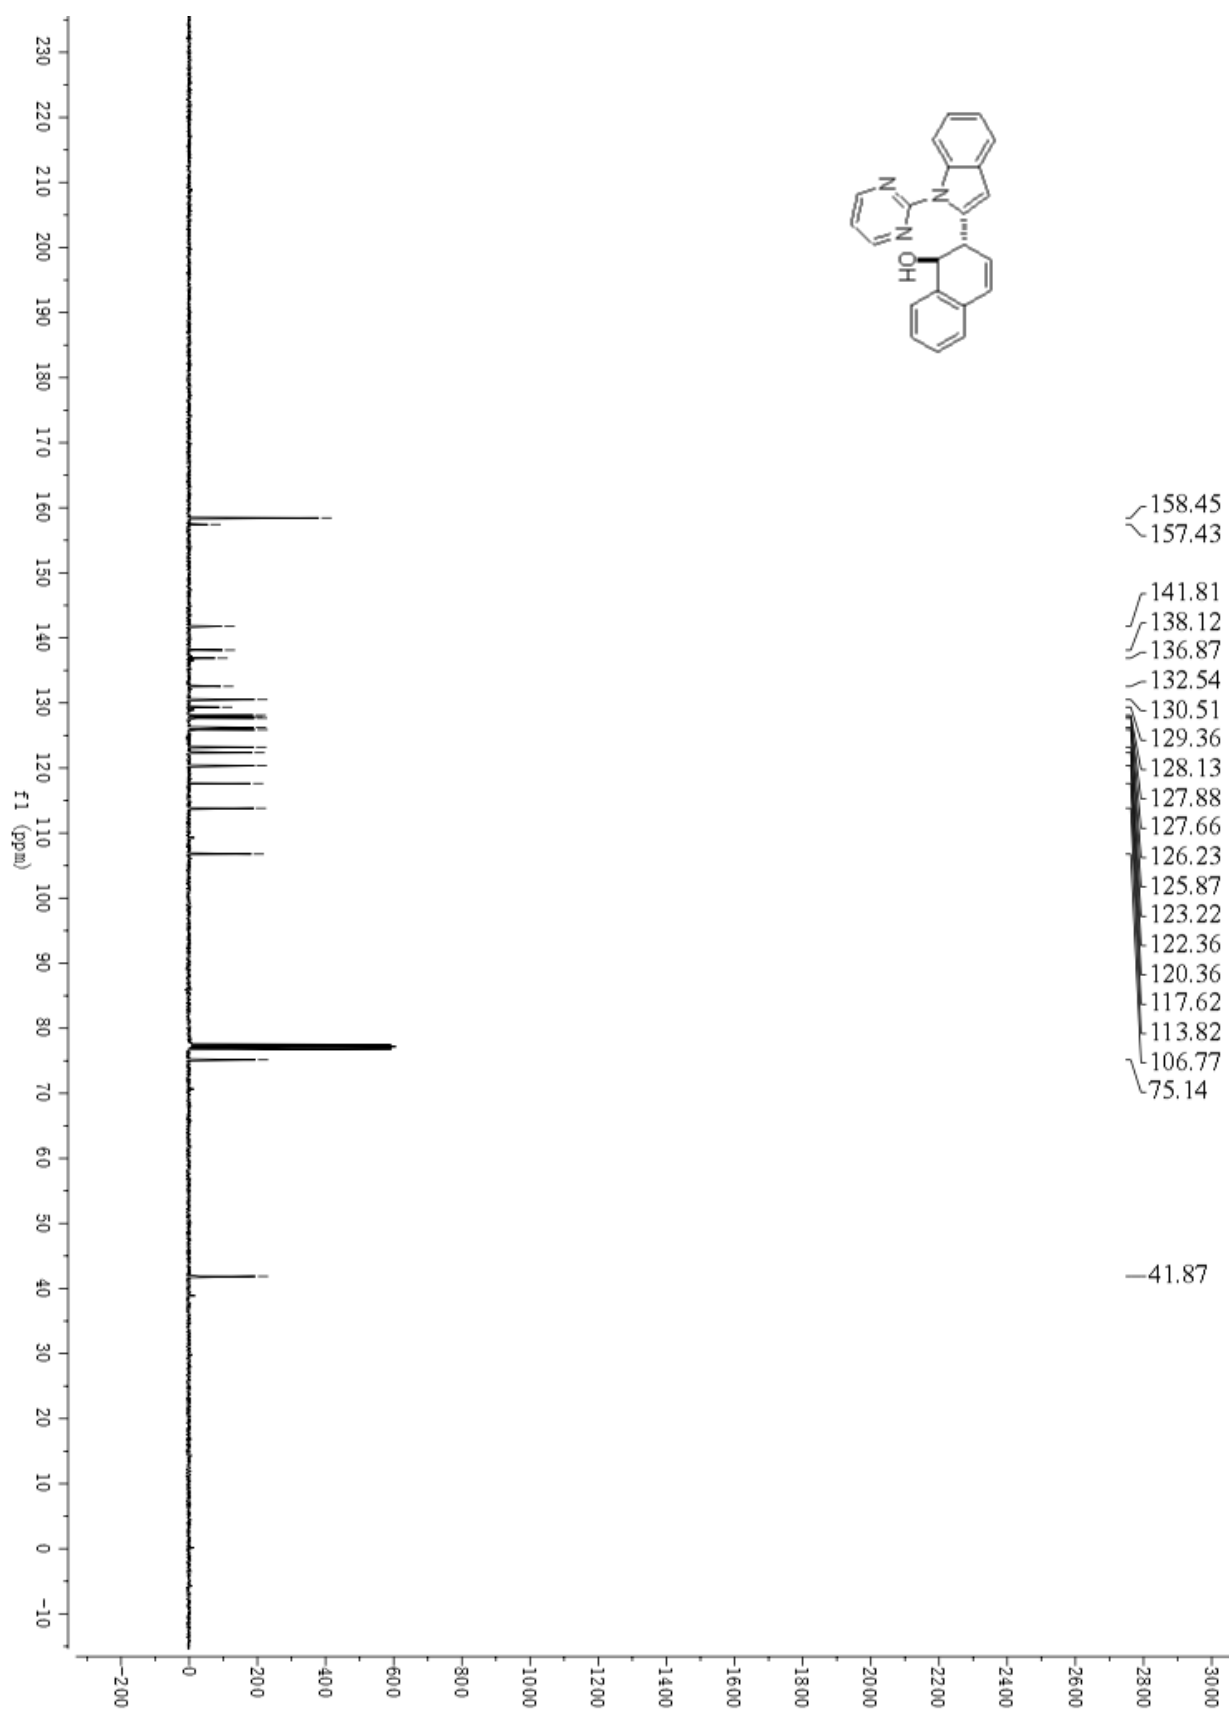

SUPPLEMENTARY INFORMATION

Supplementary Fig. 16 <sup>1</sup>H NMR Spectrum of *cis*-3aa

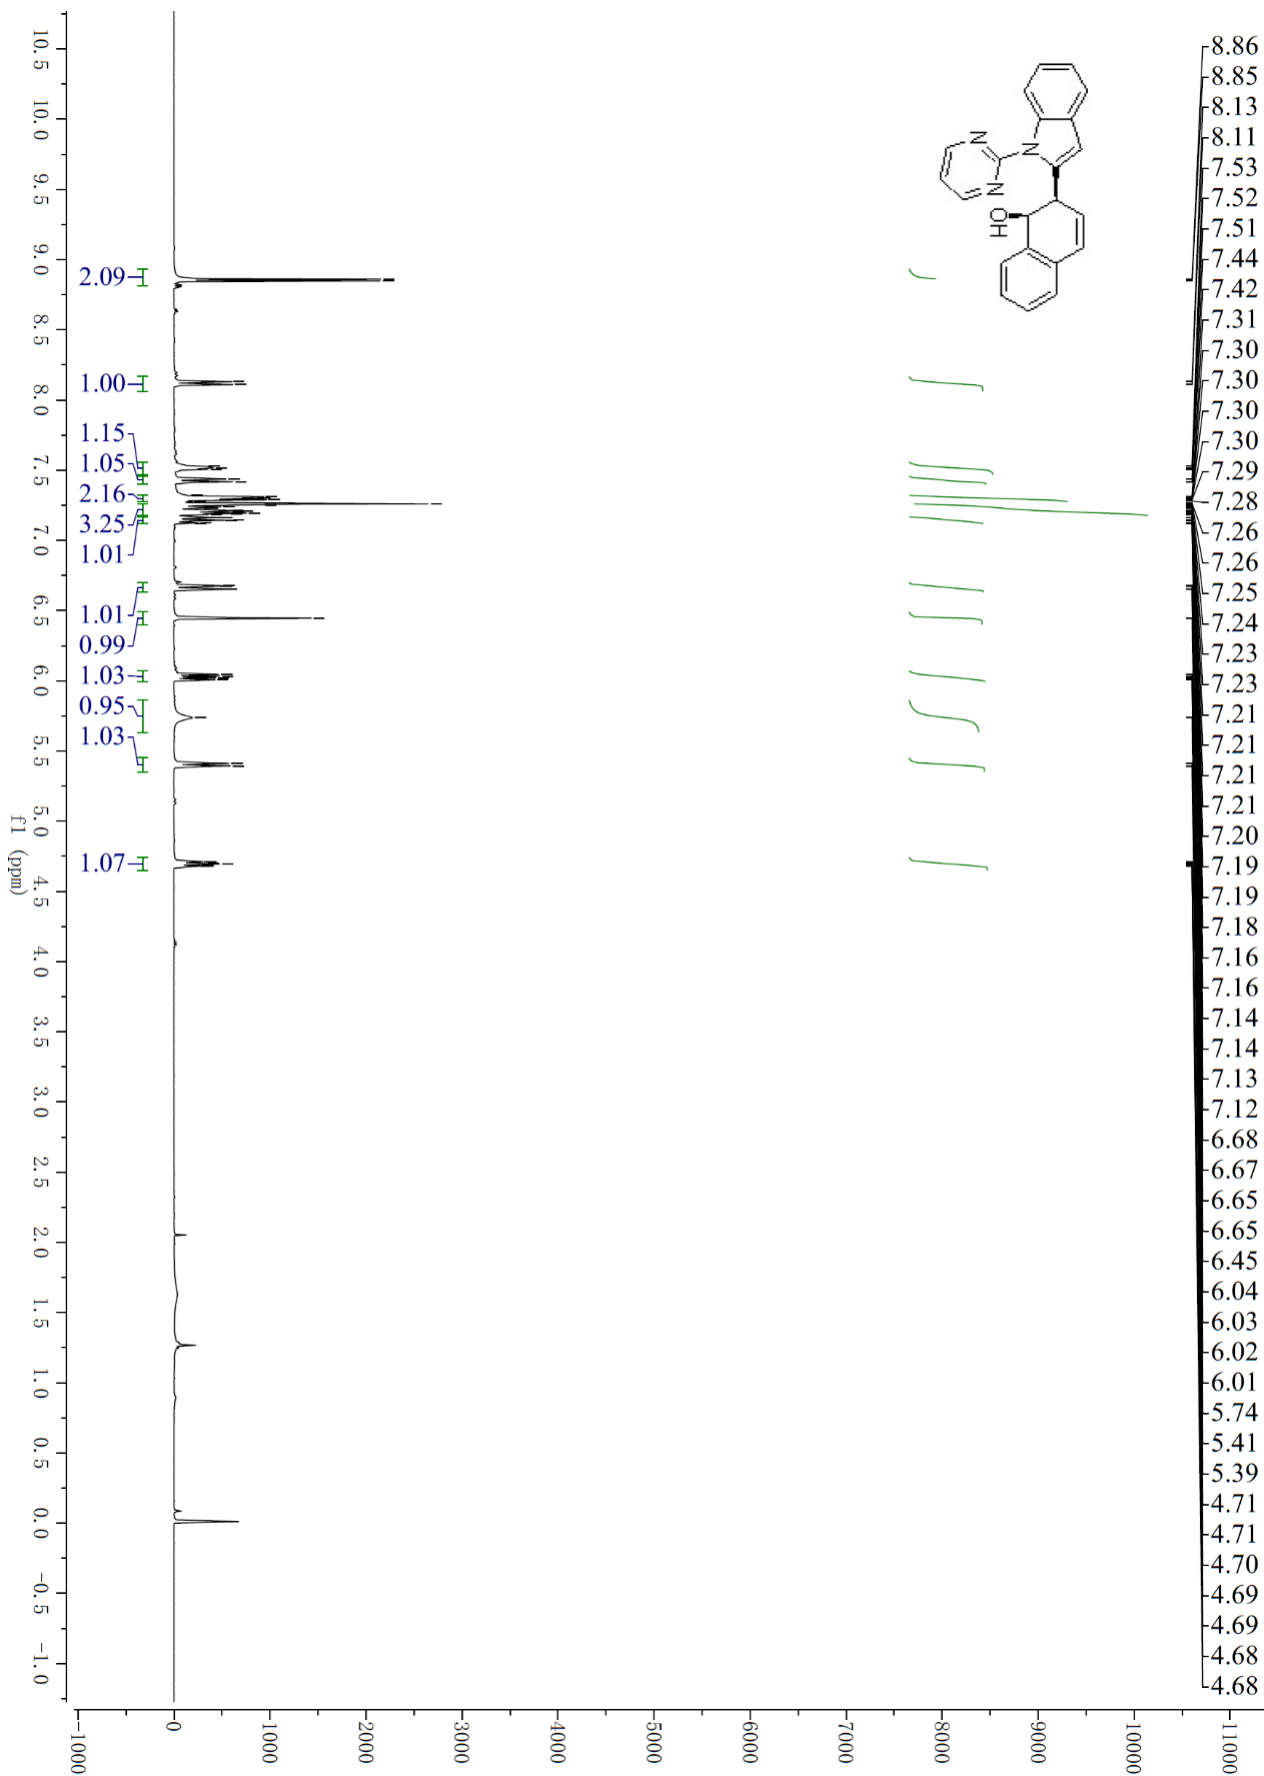

# SUPPLEMENTARY INFORMATION

**Supplementary Fig. 17**  $^{13}\text{C}$  NMR Spectrum of *cis*-3aa

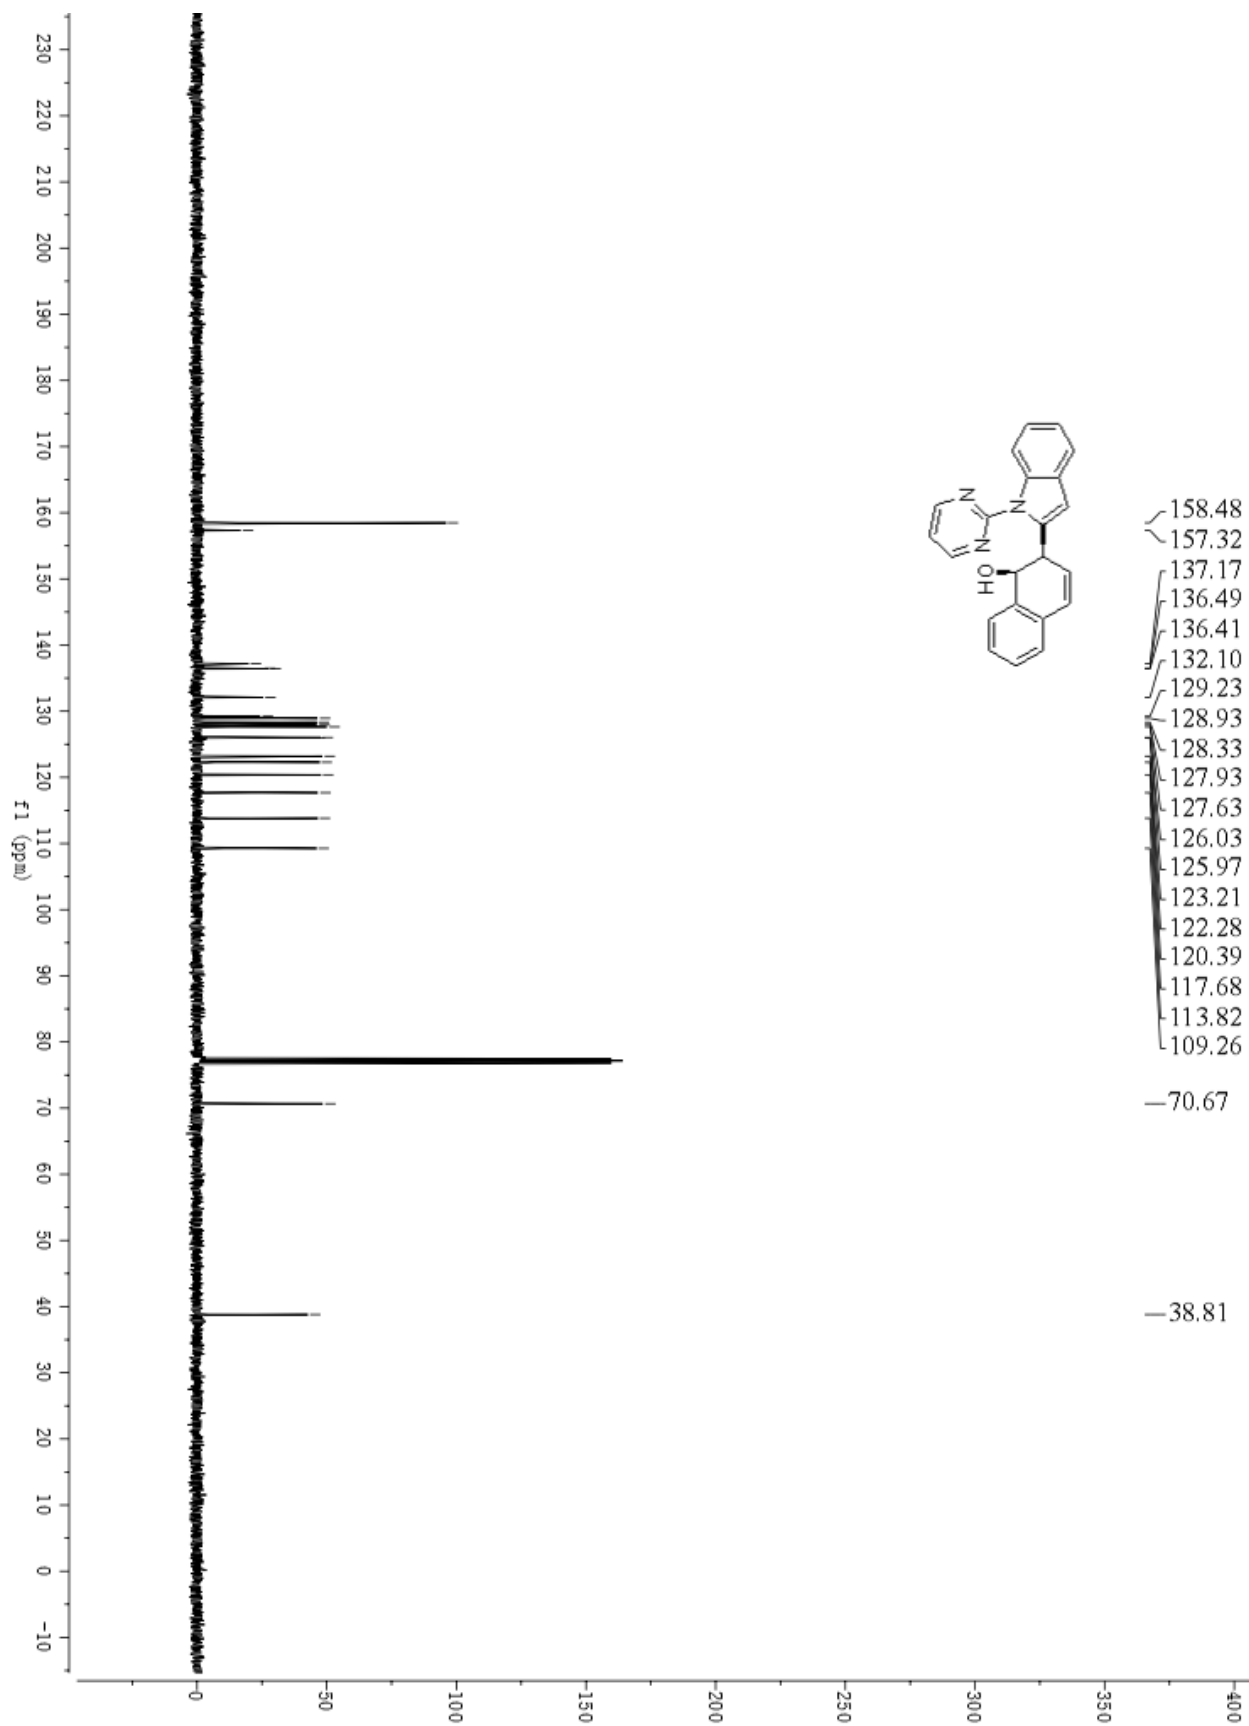

# SUPPLEMENTARY INFORMATION

**Supplementary Fig. 18**  $^1\text{H}$  NMR Spectrum of *cis*-3ba

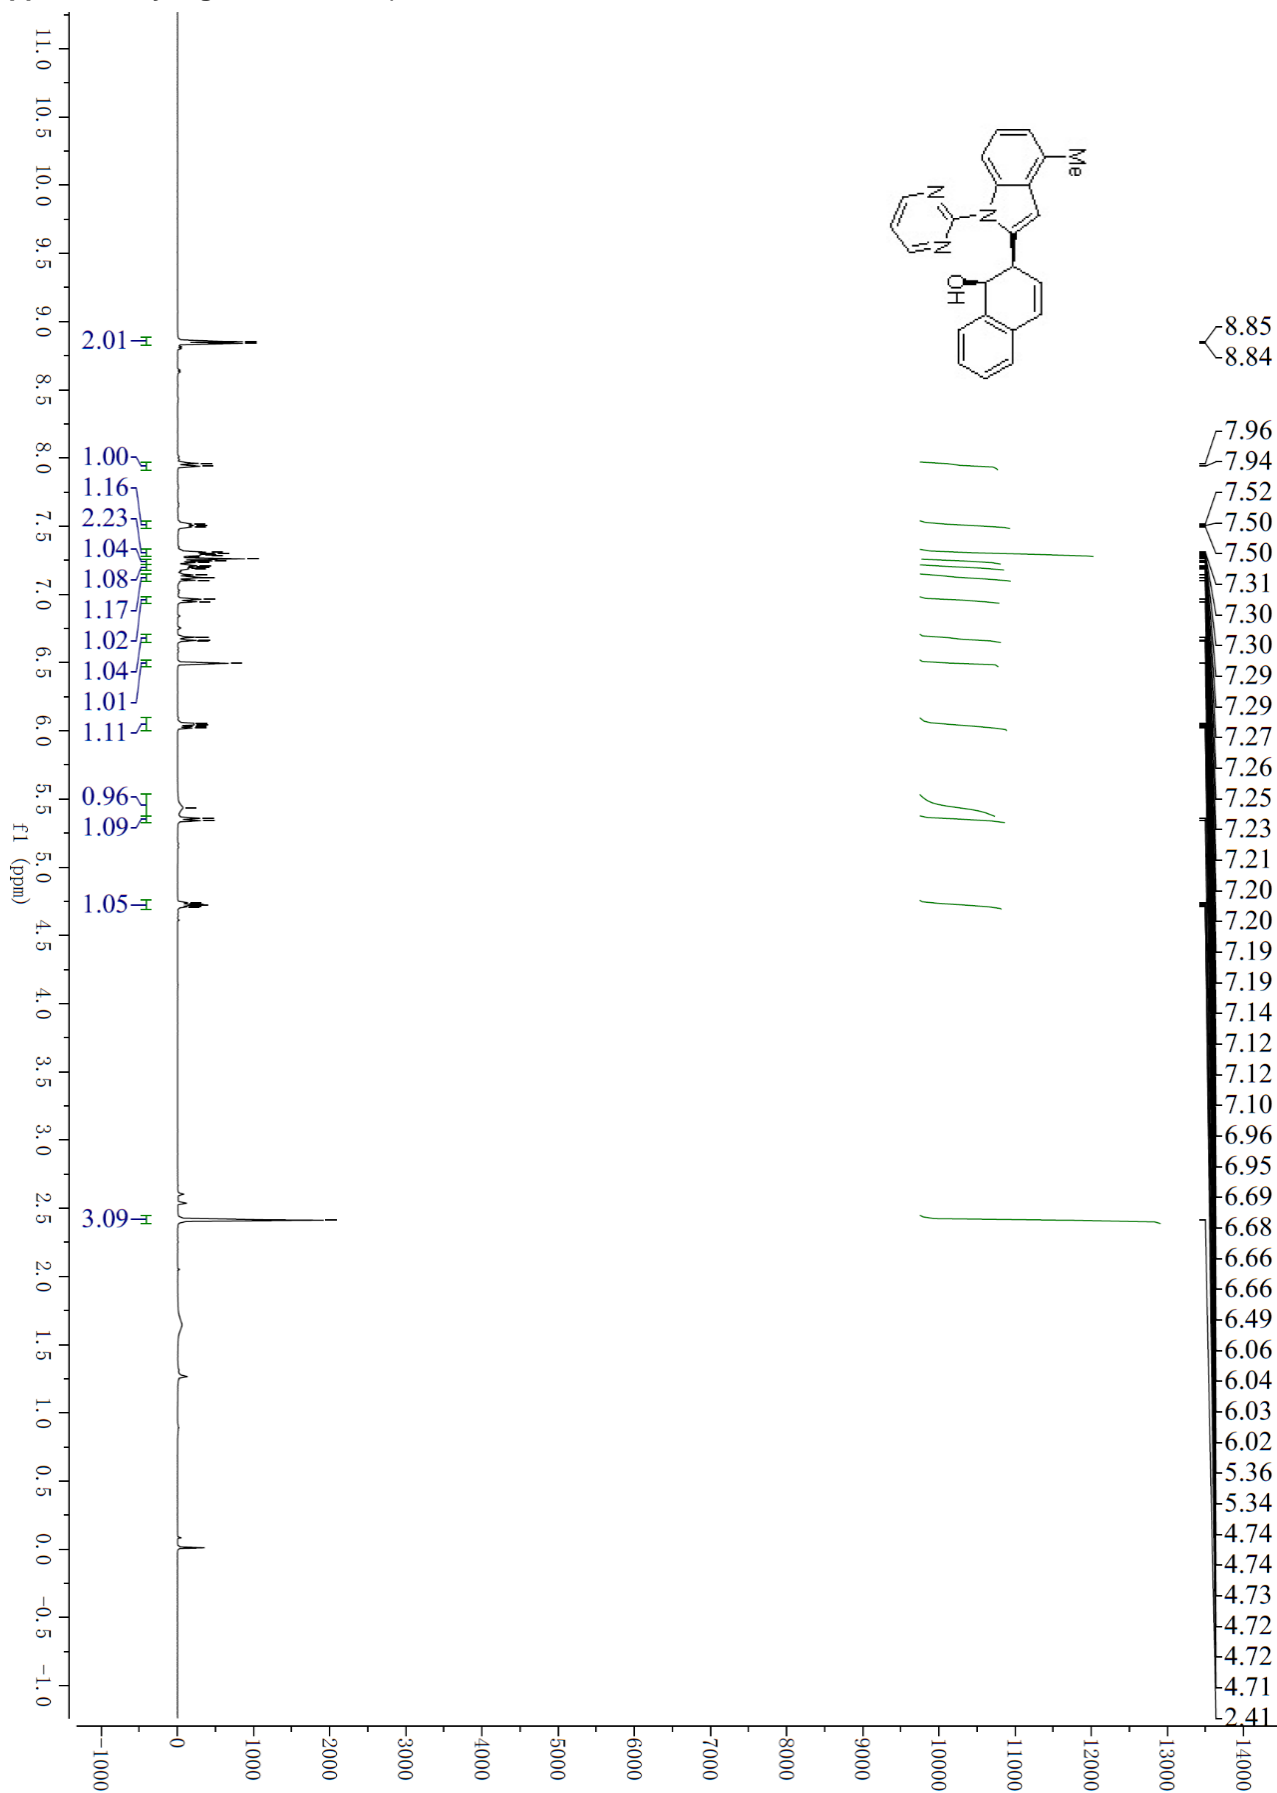

# SUPPLEMENTARY INFORMATION

**Supplementary Fig. 19**  $^{13}\text{C}$  NMR Spectrum of *cis*-3ba

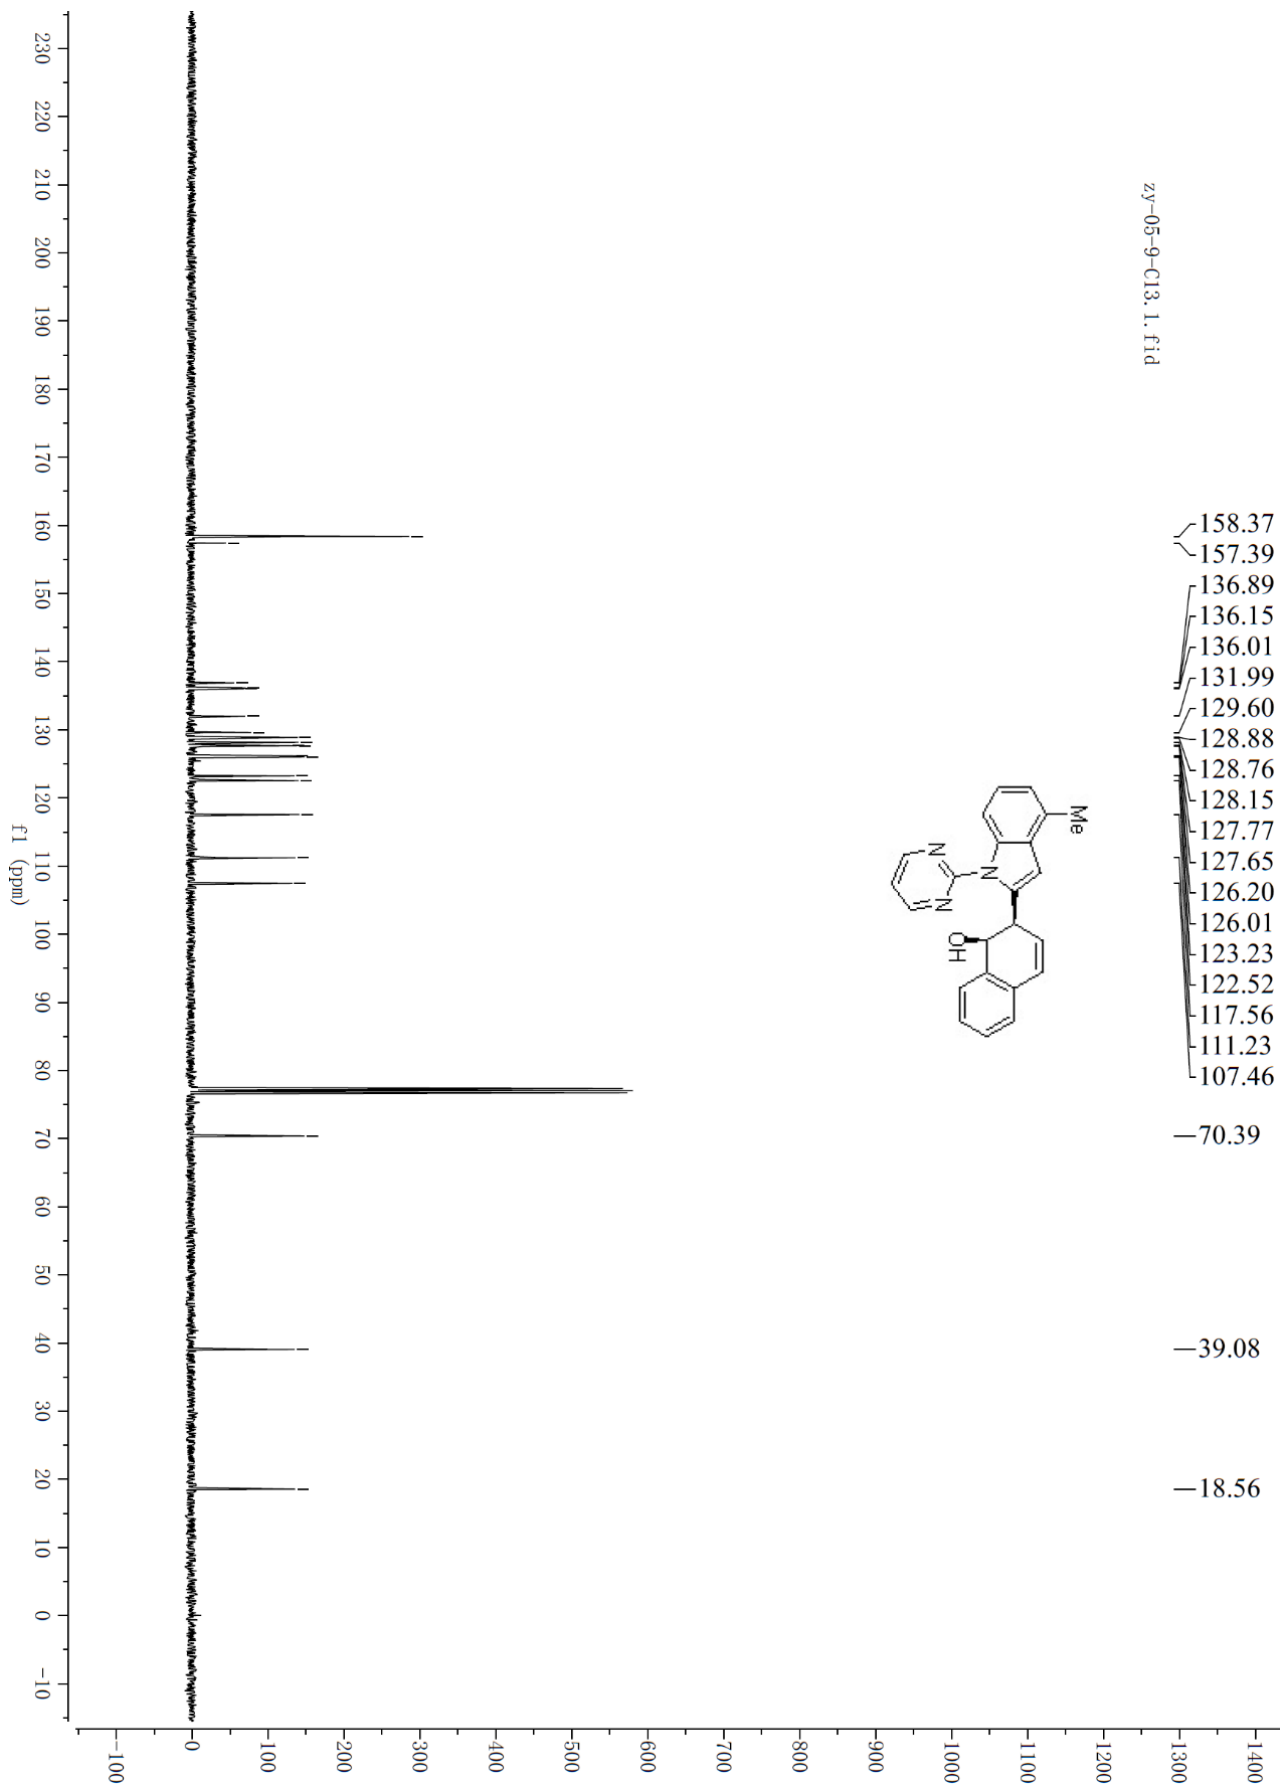

# SUPPLEMENTARY INFORMATION

**Supplementary Fig. 20**  $^1\text{H}$  NMR Spectrum of *cis*-3ca

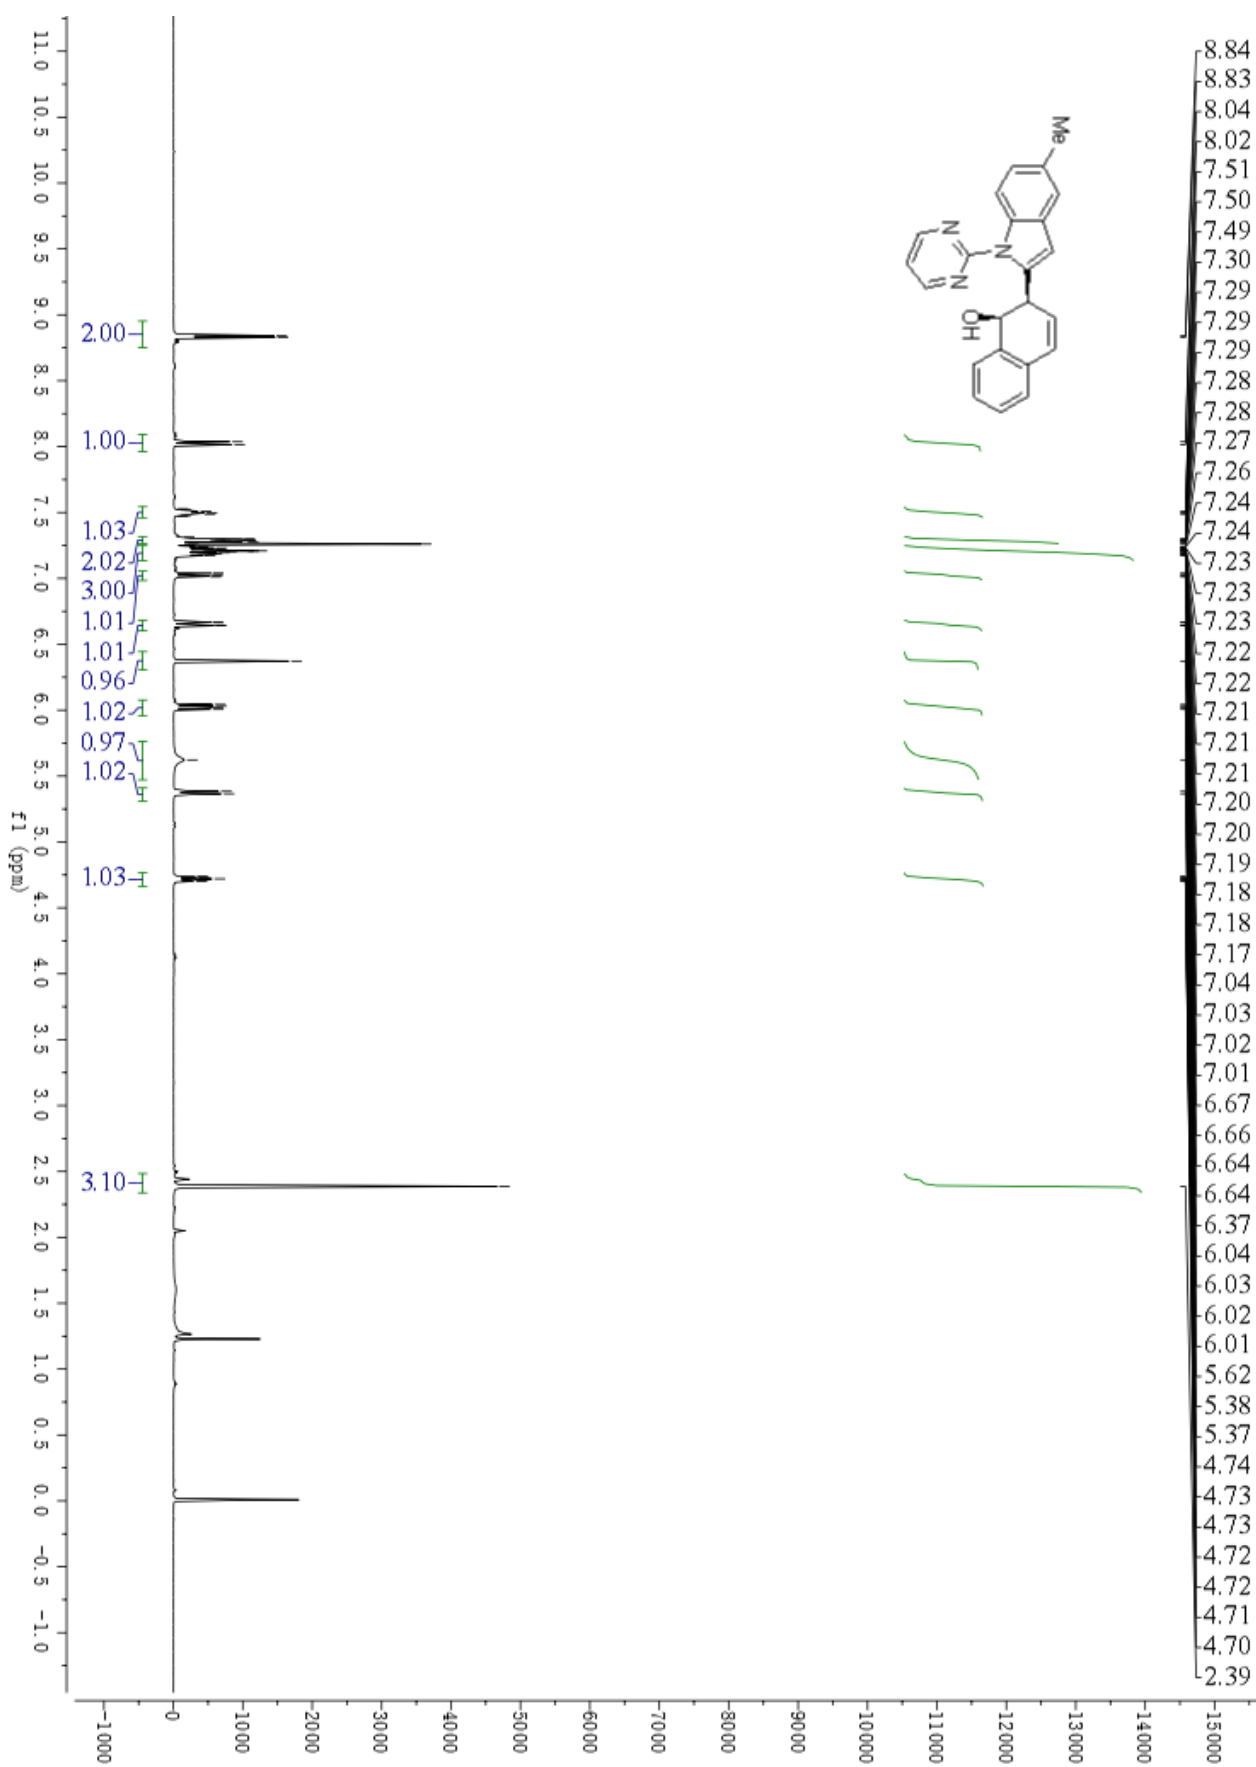

# SUPPLEMENTARY INFORMATION

**Supplementary Fig. 21**  $^{13}\text{C}$  NMR Spectrum of *cis*-3ca

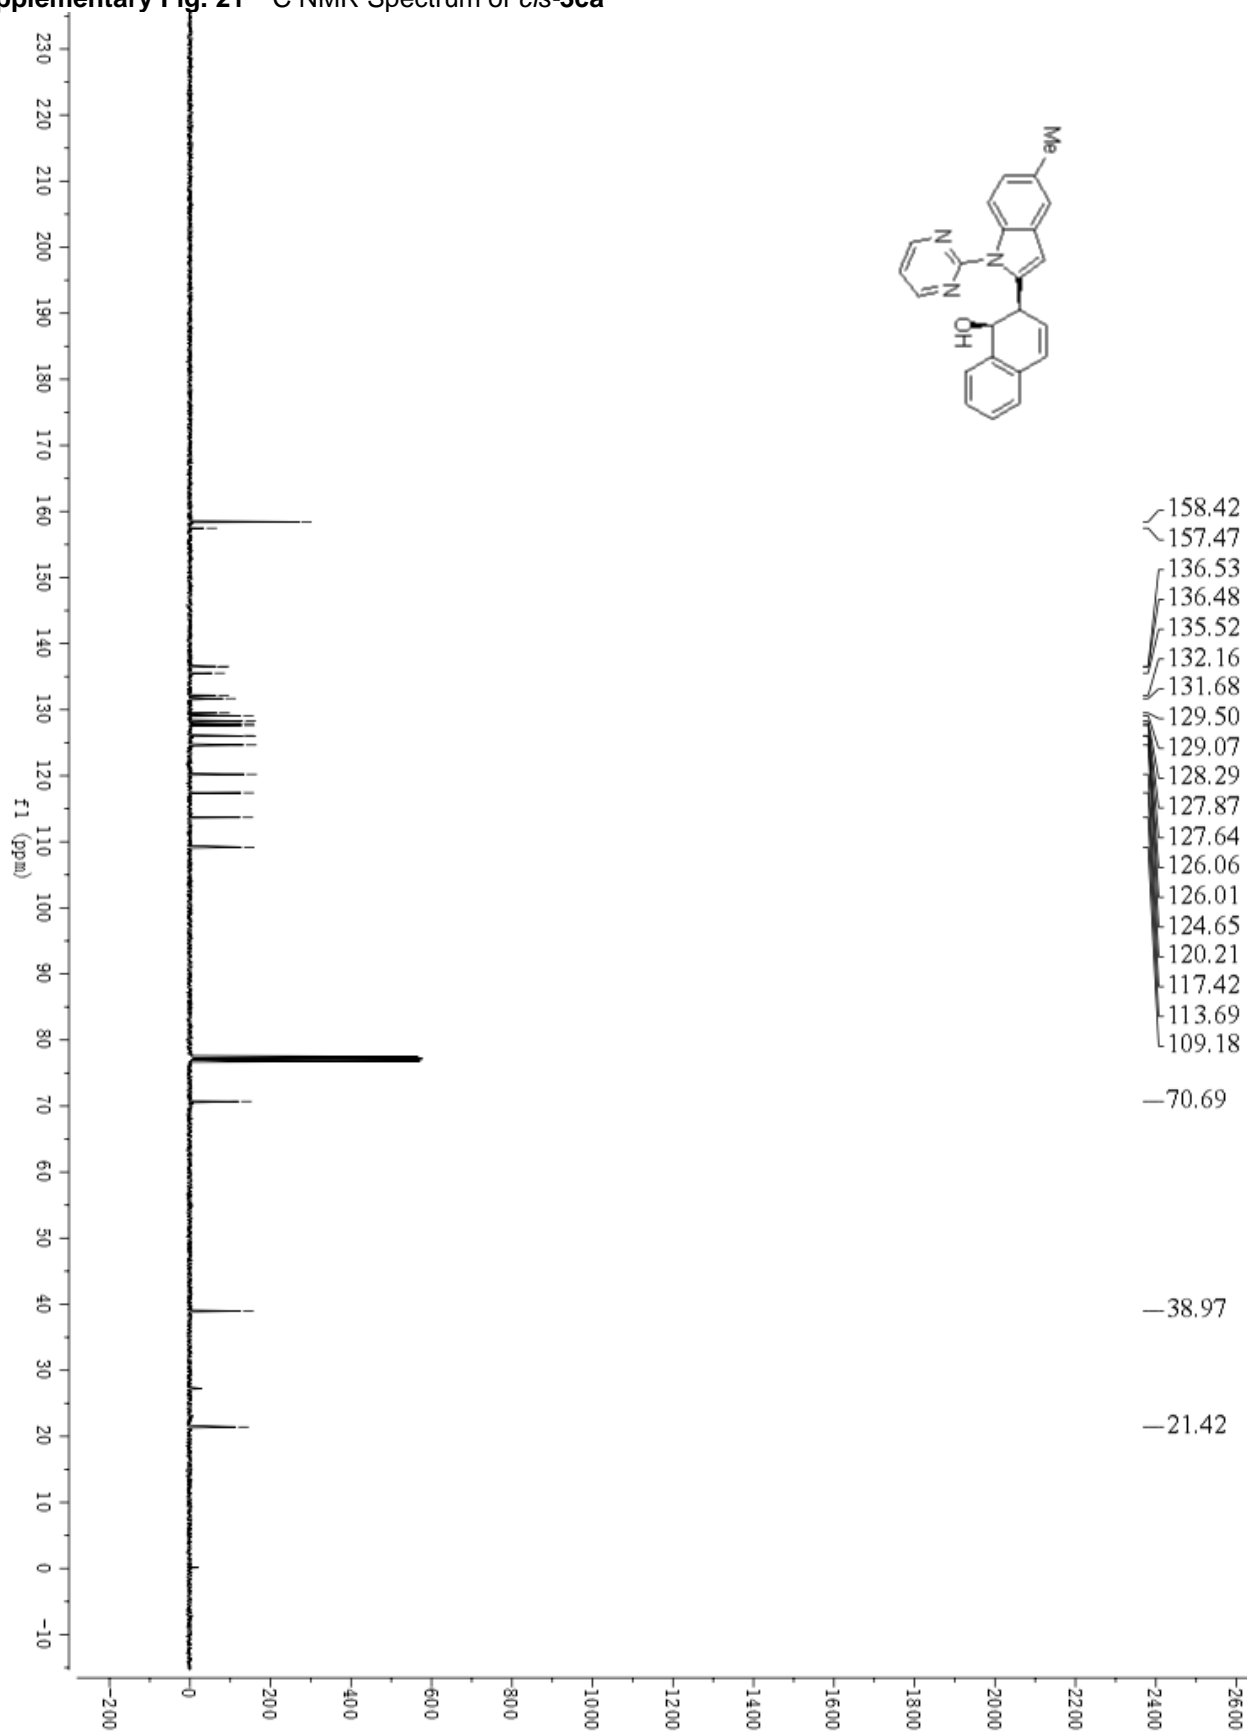



# SUPPLEMENTRAY INFORMATION

**Supplementary Fig. 22**  $^1\text{H}$  NMR Spectrum of *cis*-3da

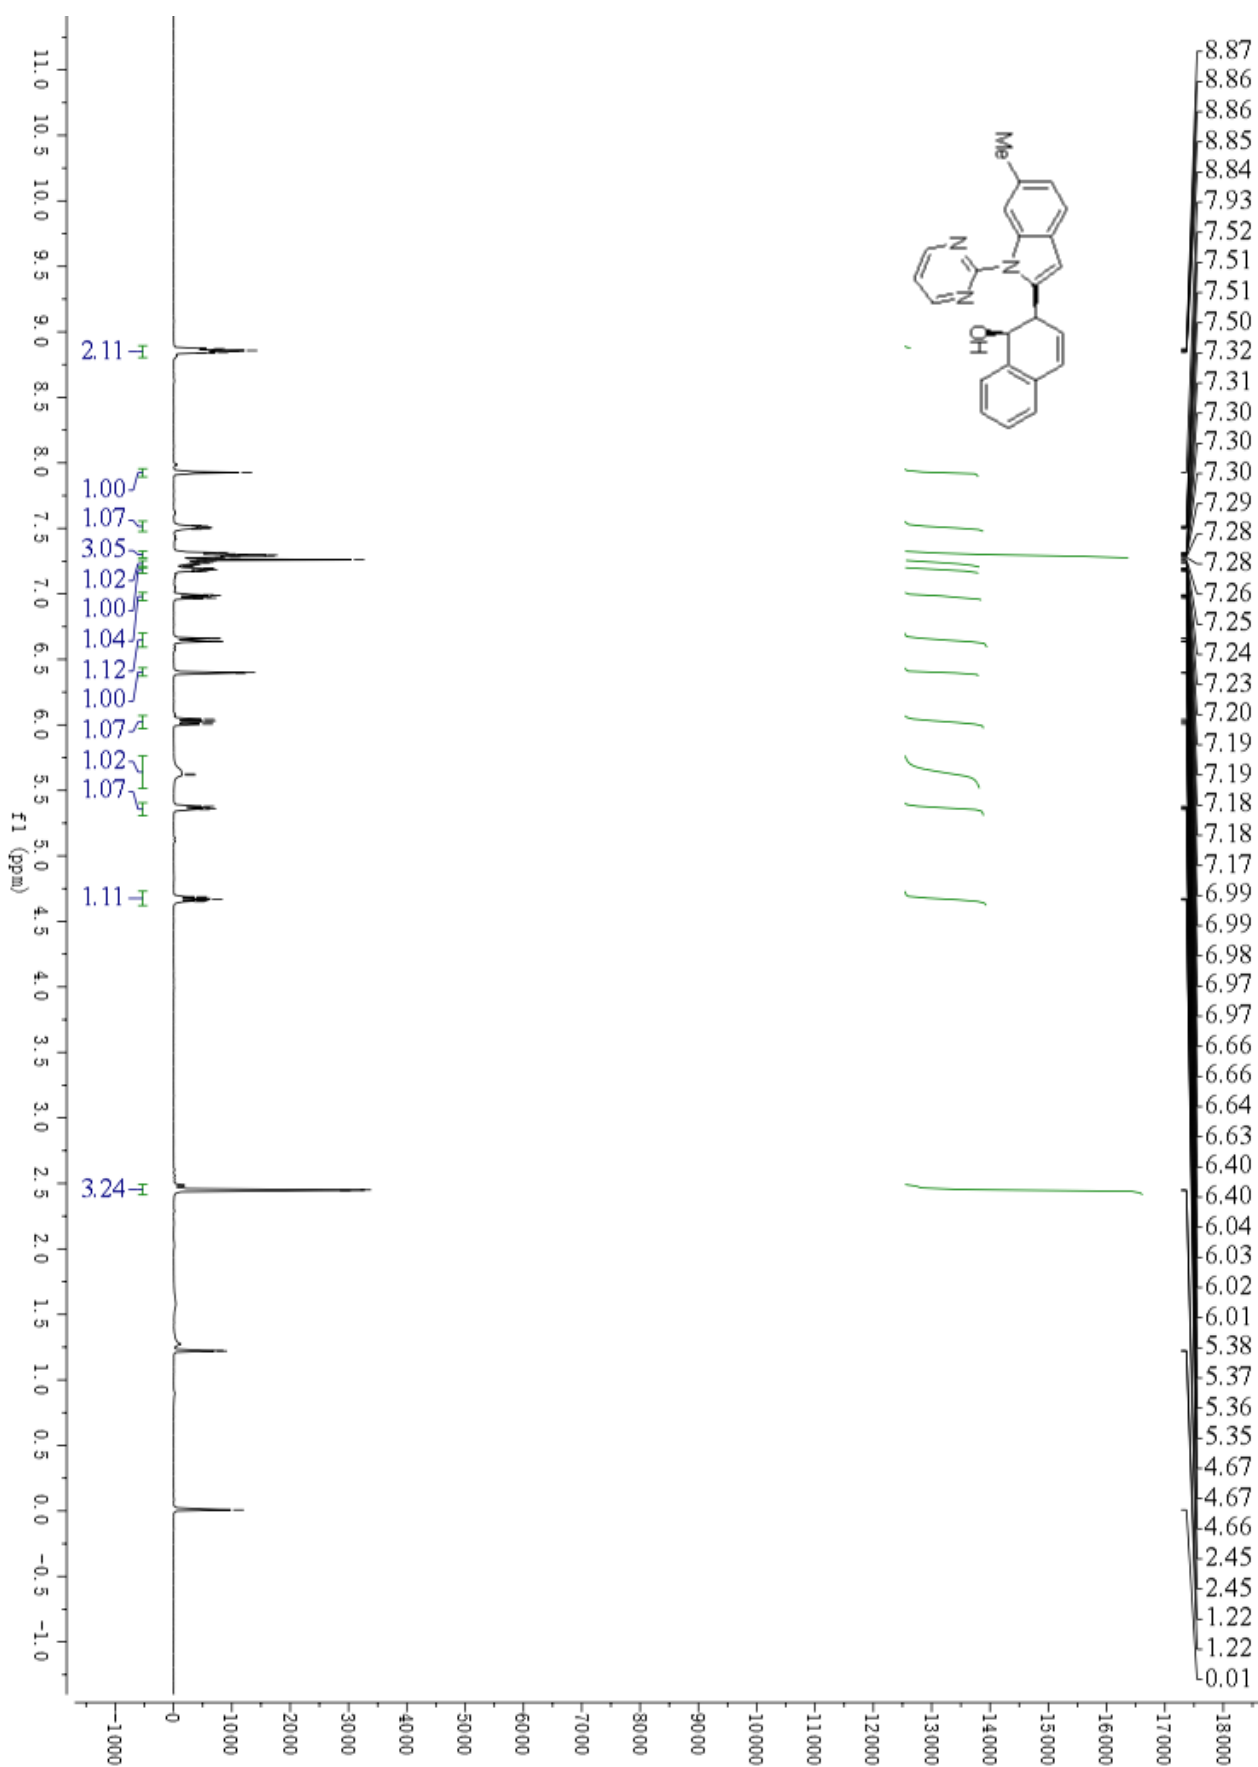

# SUPPLEMENTARY INFORMATION

**Supplementary Fig. 23**  $^{13}\text{C}$  NMR Spectrum of *cis*-3da

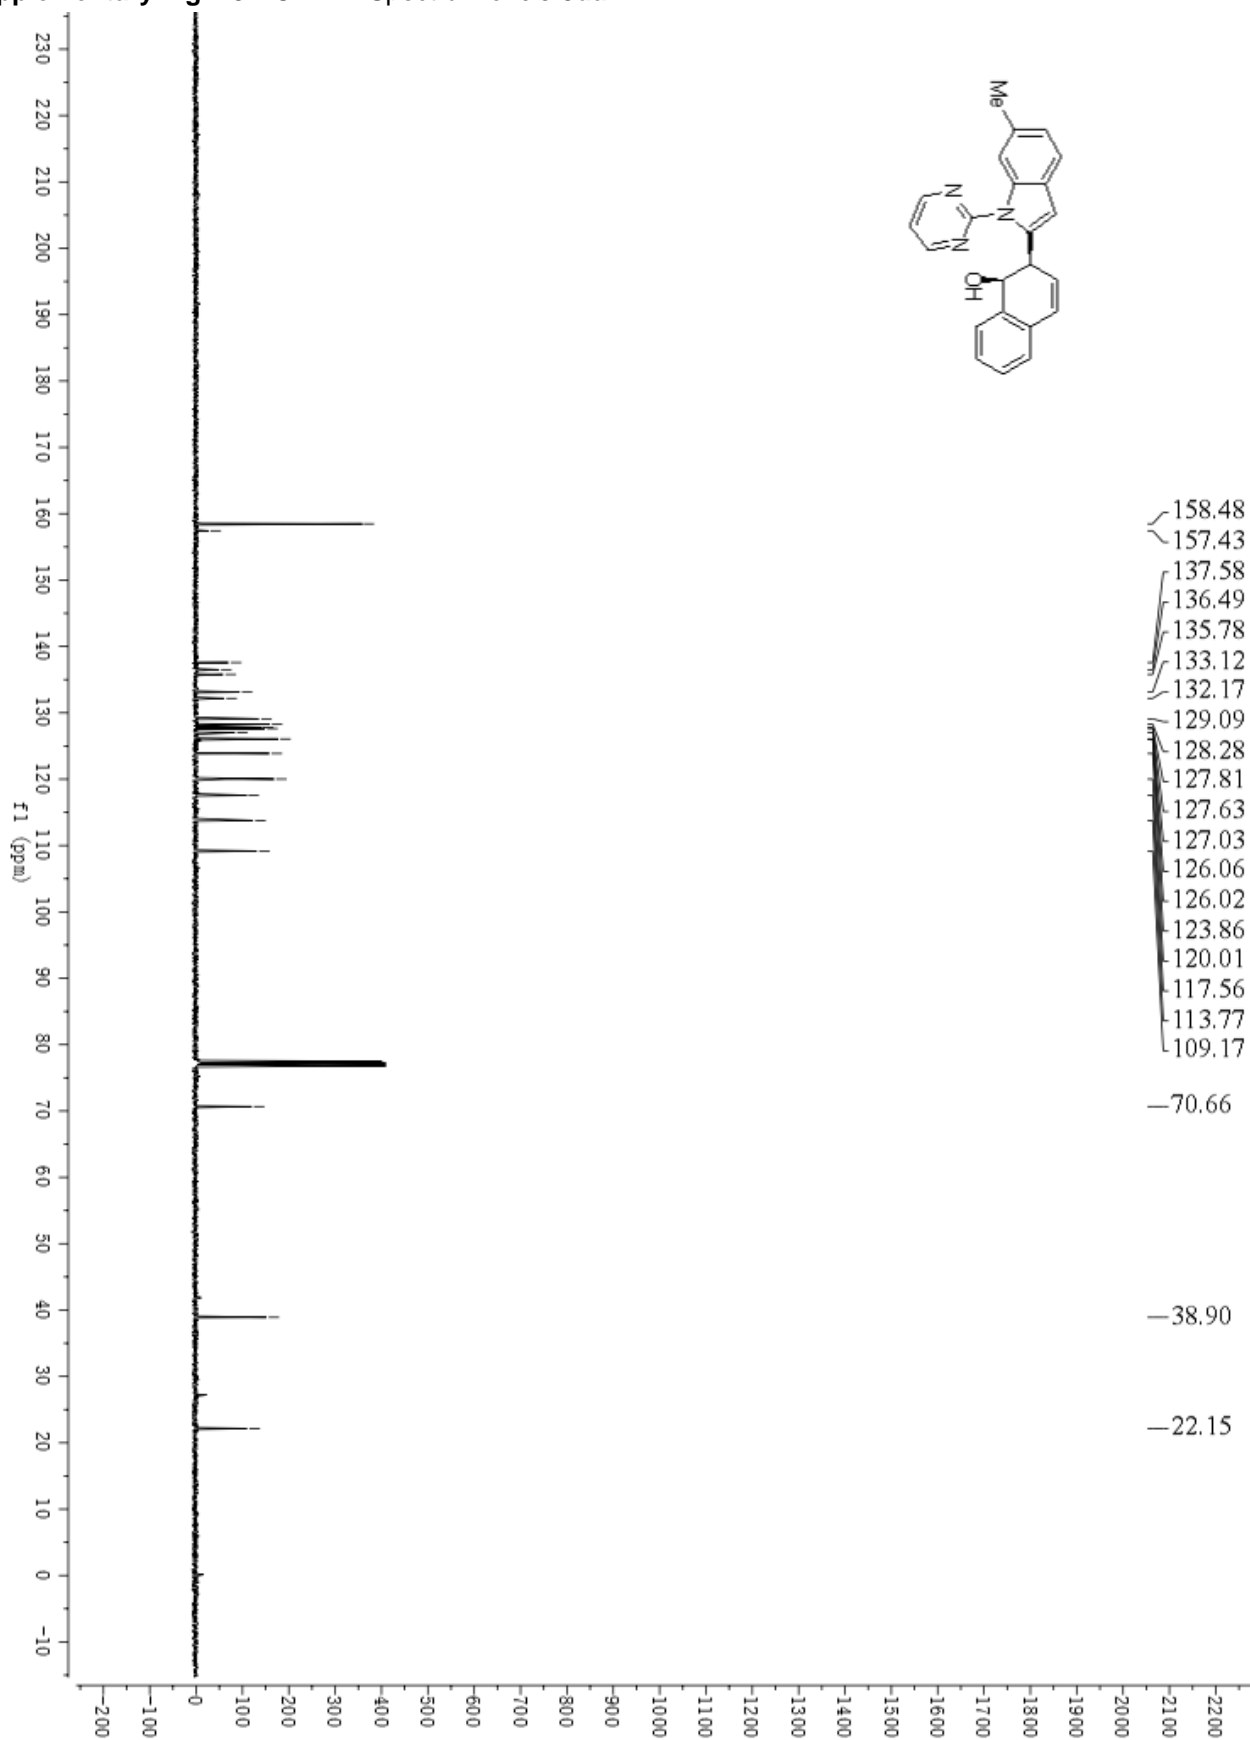

# SUPPLEMENTARY INFORMATION

**Supplementary Fig. 24**  $^1\text{H}$  NMR Spectrum of *cis*-3ea

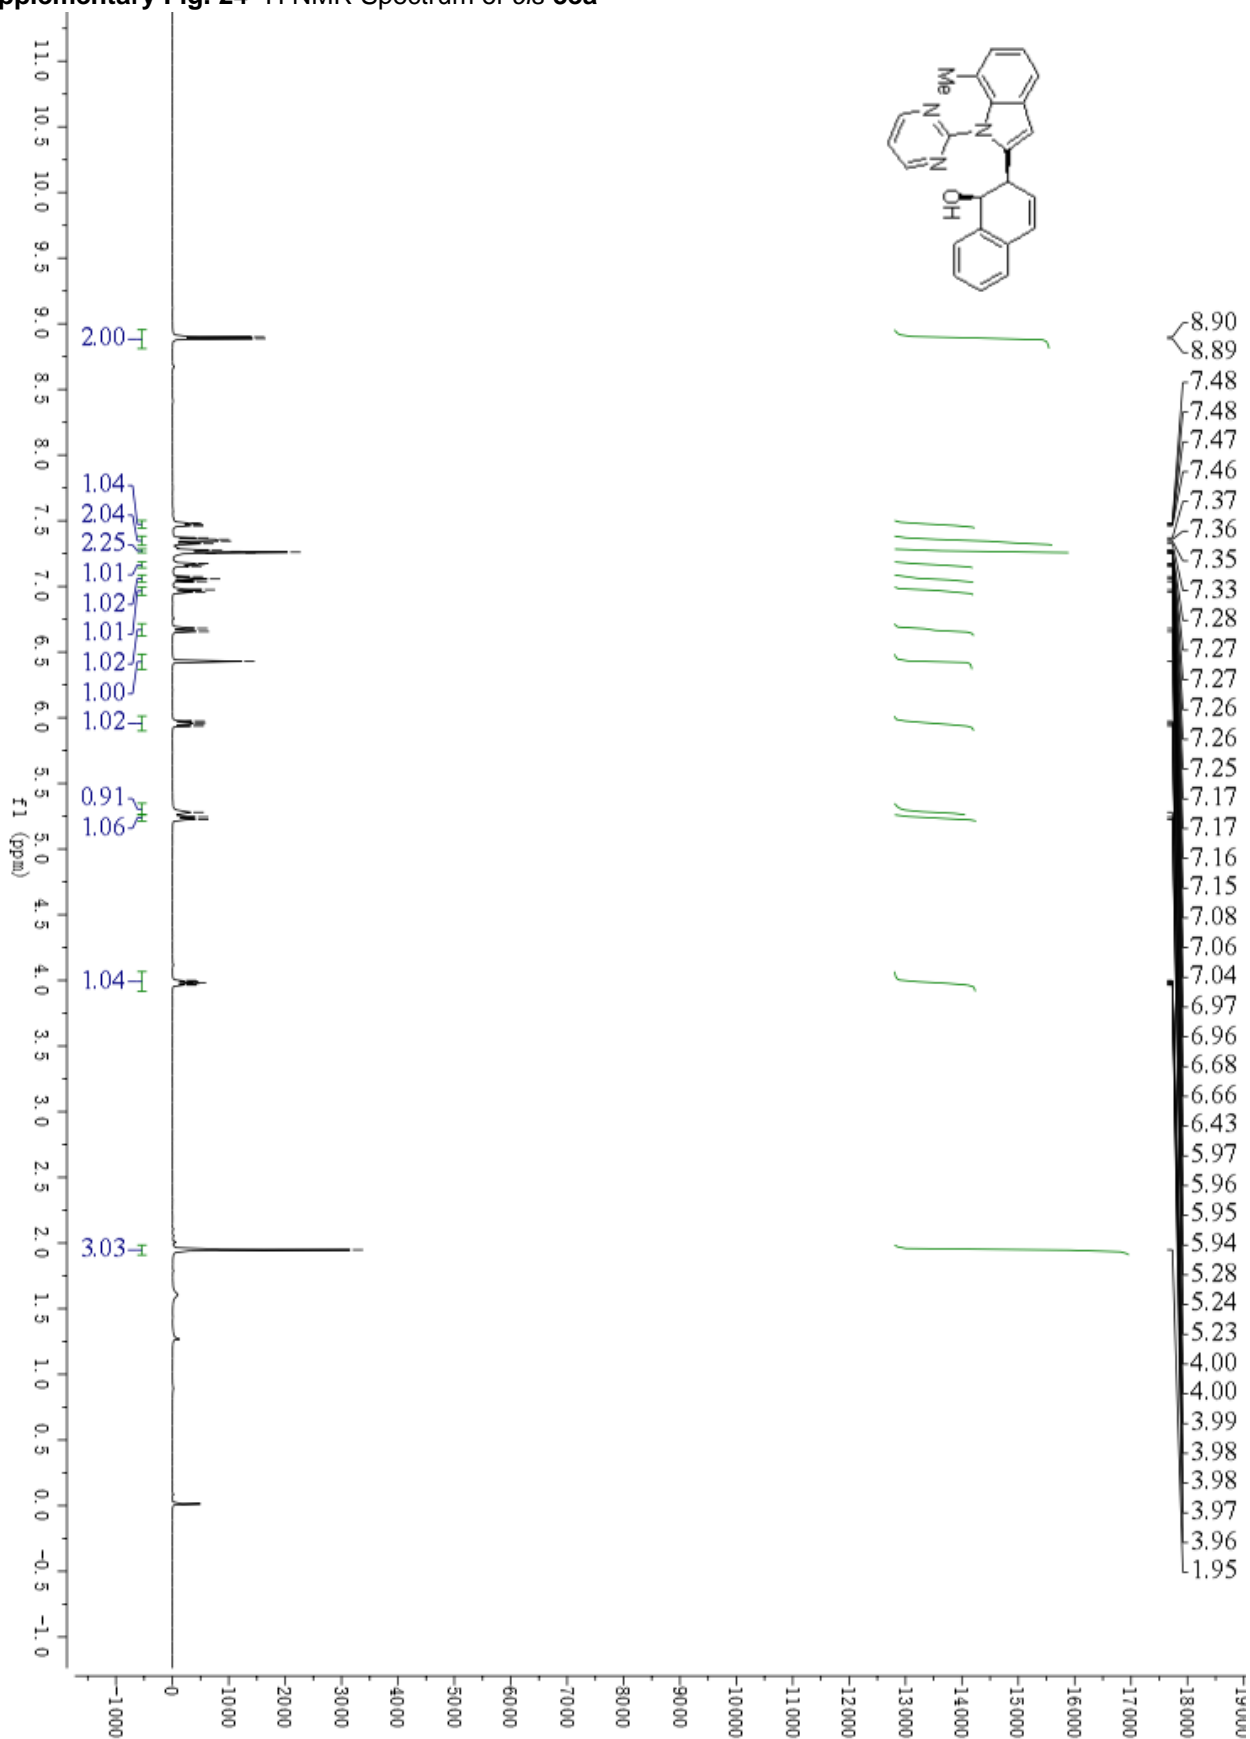

# SUPPLEMENTARY INFORMATION

**Supplementary Fig. 25**  $^{13}\text{C}$  NMR Spectrum of *cis*-3ea

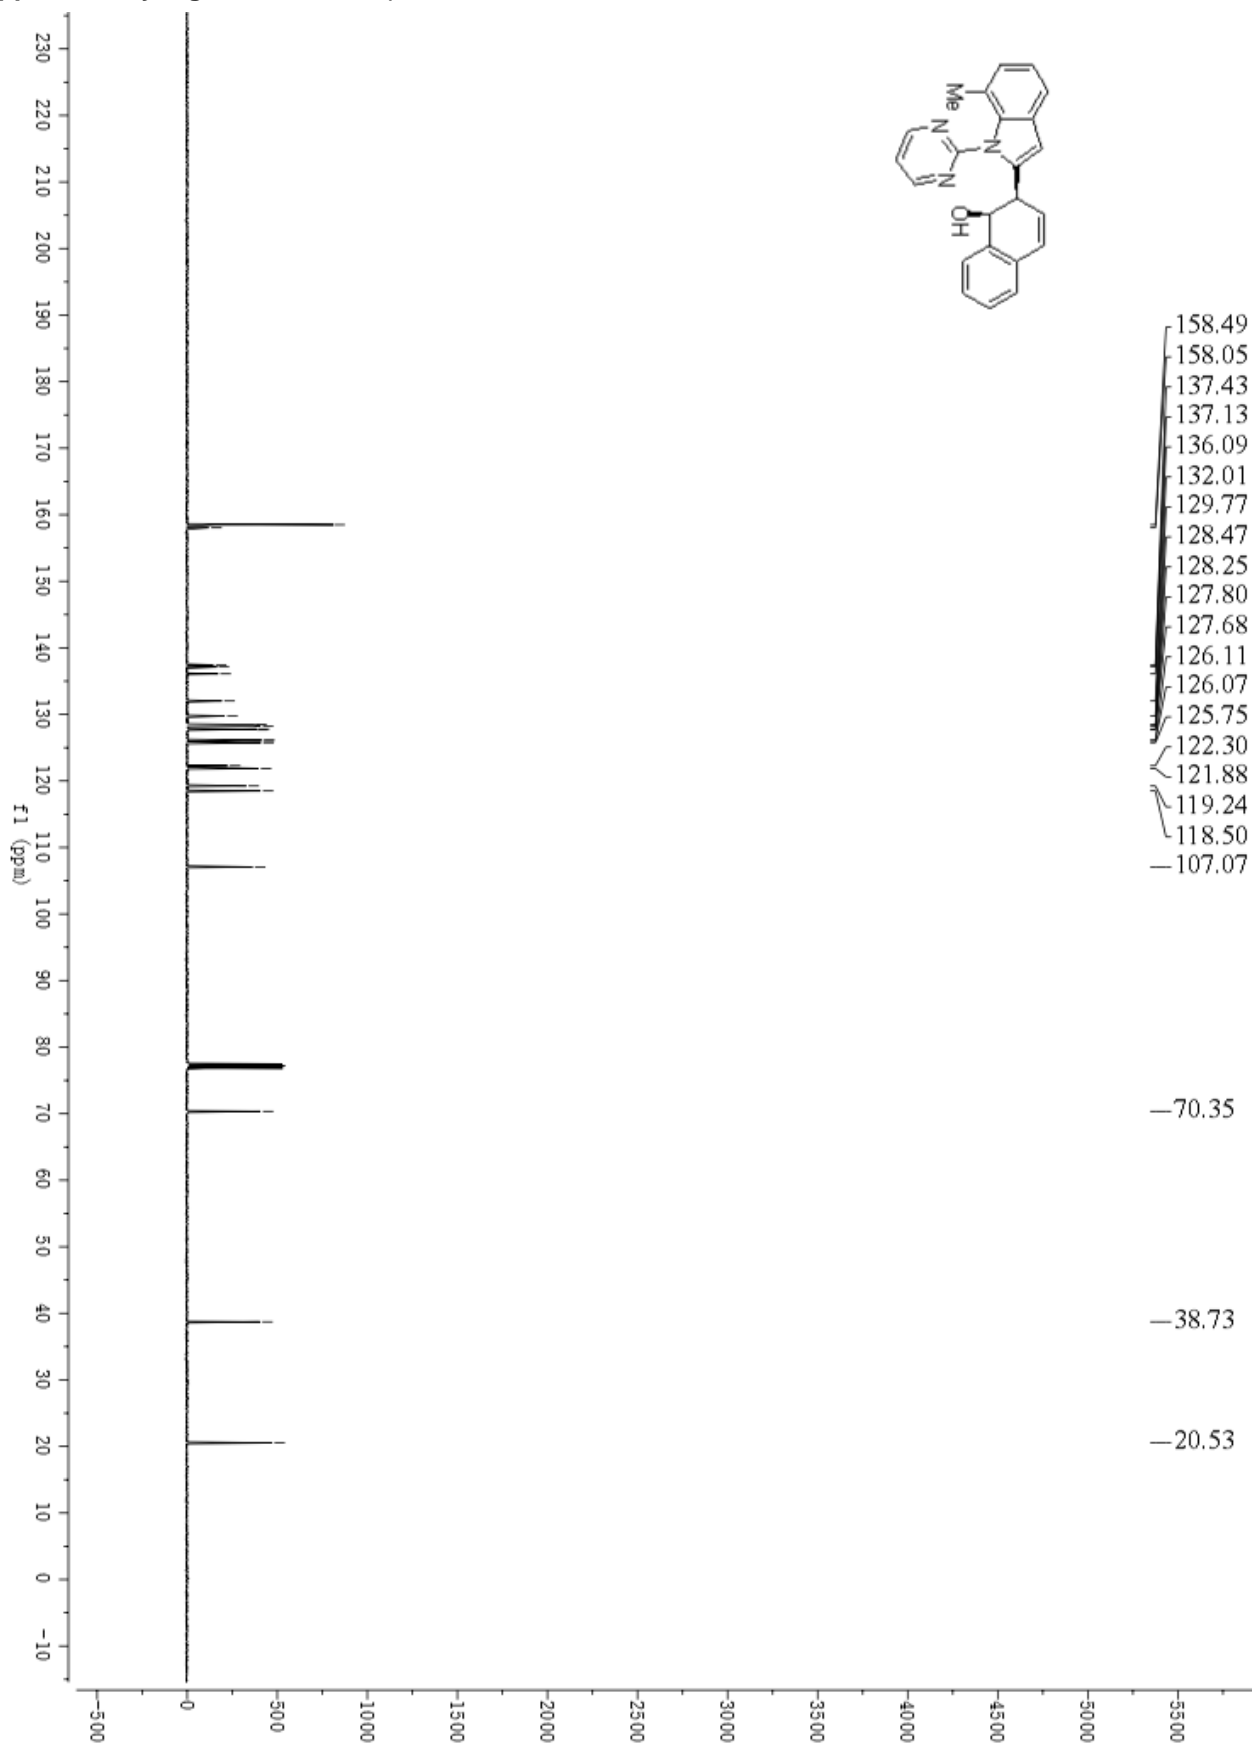

# SUPPLEMENTARY INFORMATION

**Supplementary Fig. 26**  $^1\text{H}$  NMR Spectrum of *cis*-3fa

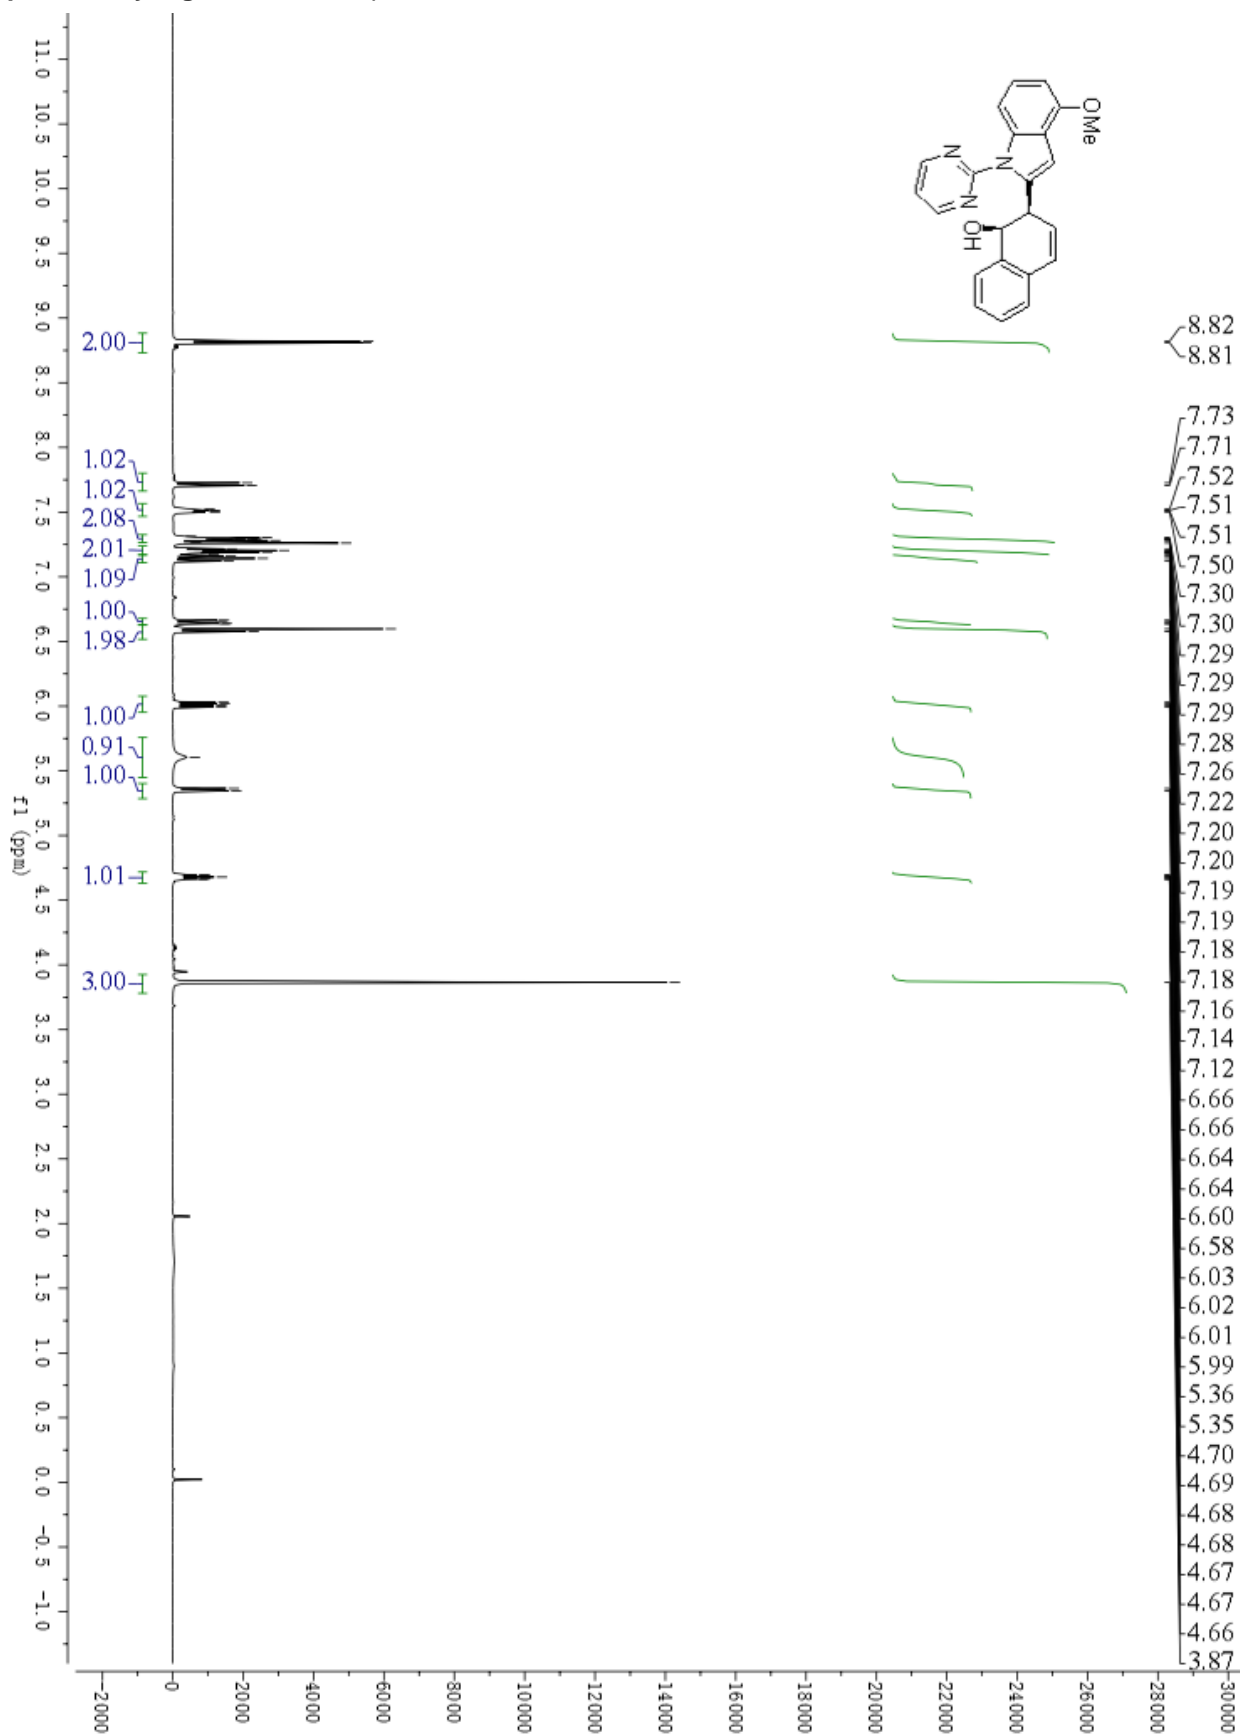

# SUPPLEMENTARY INFORMATION

**Supplementary Fig. 27**  $^{13}\text{C}$  NMR Spectrum of *cis*-3fa

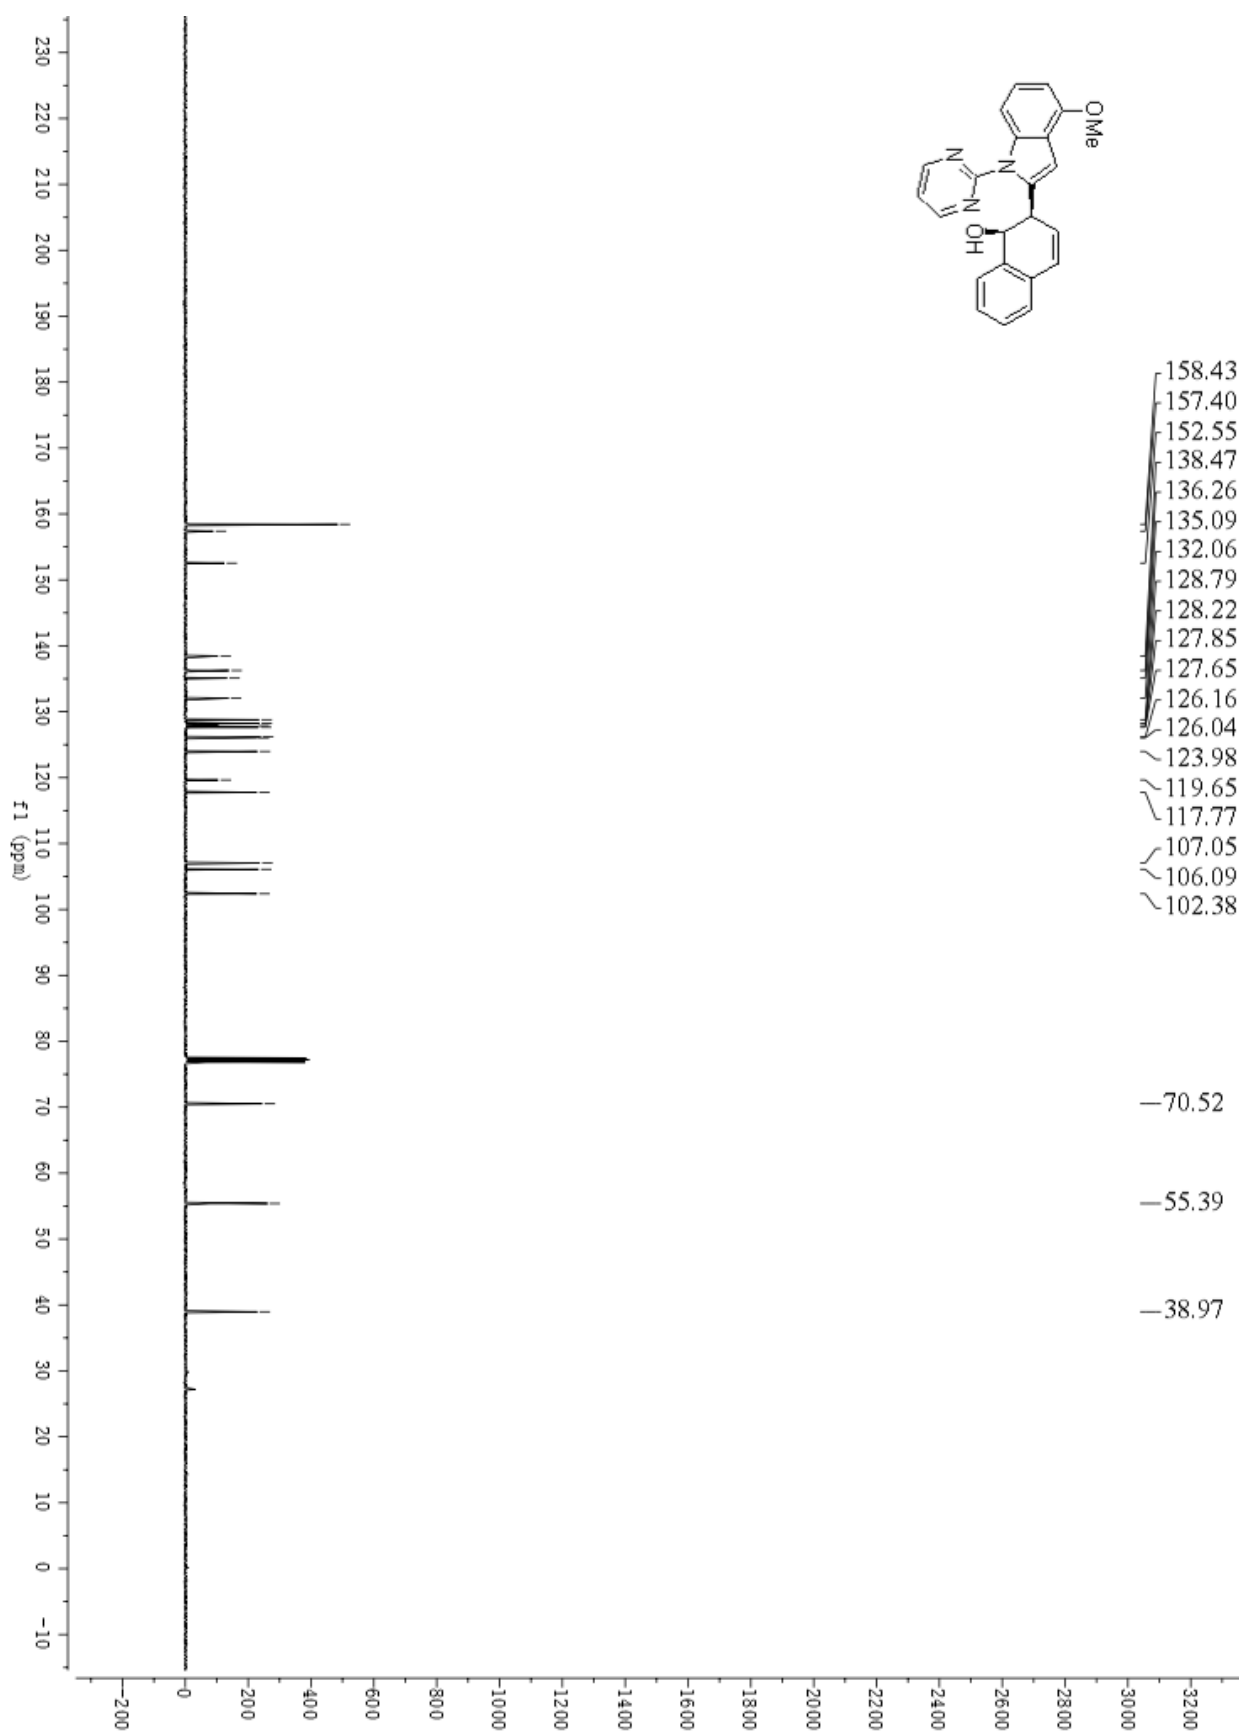

# SUPPLEMENTARY INFORMATION

**Supplementary Fig. 28**  $^1\text{H}$  NMR Spectrum of *cis*-3ga

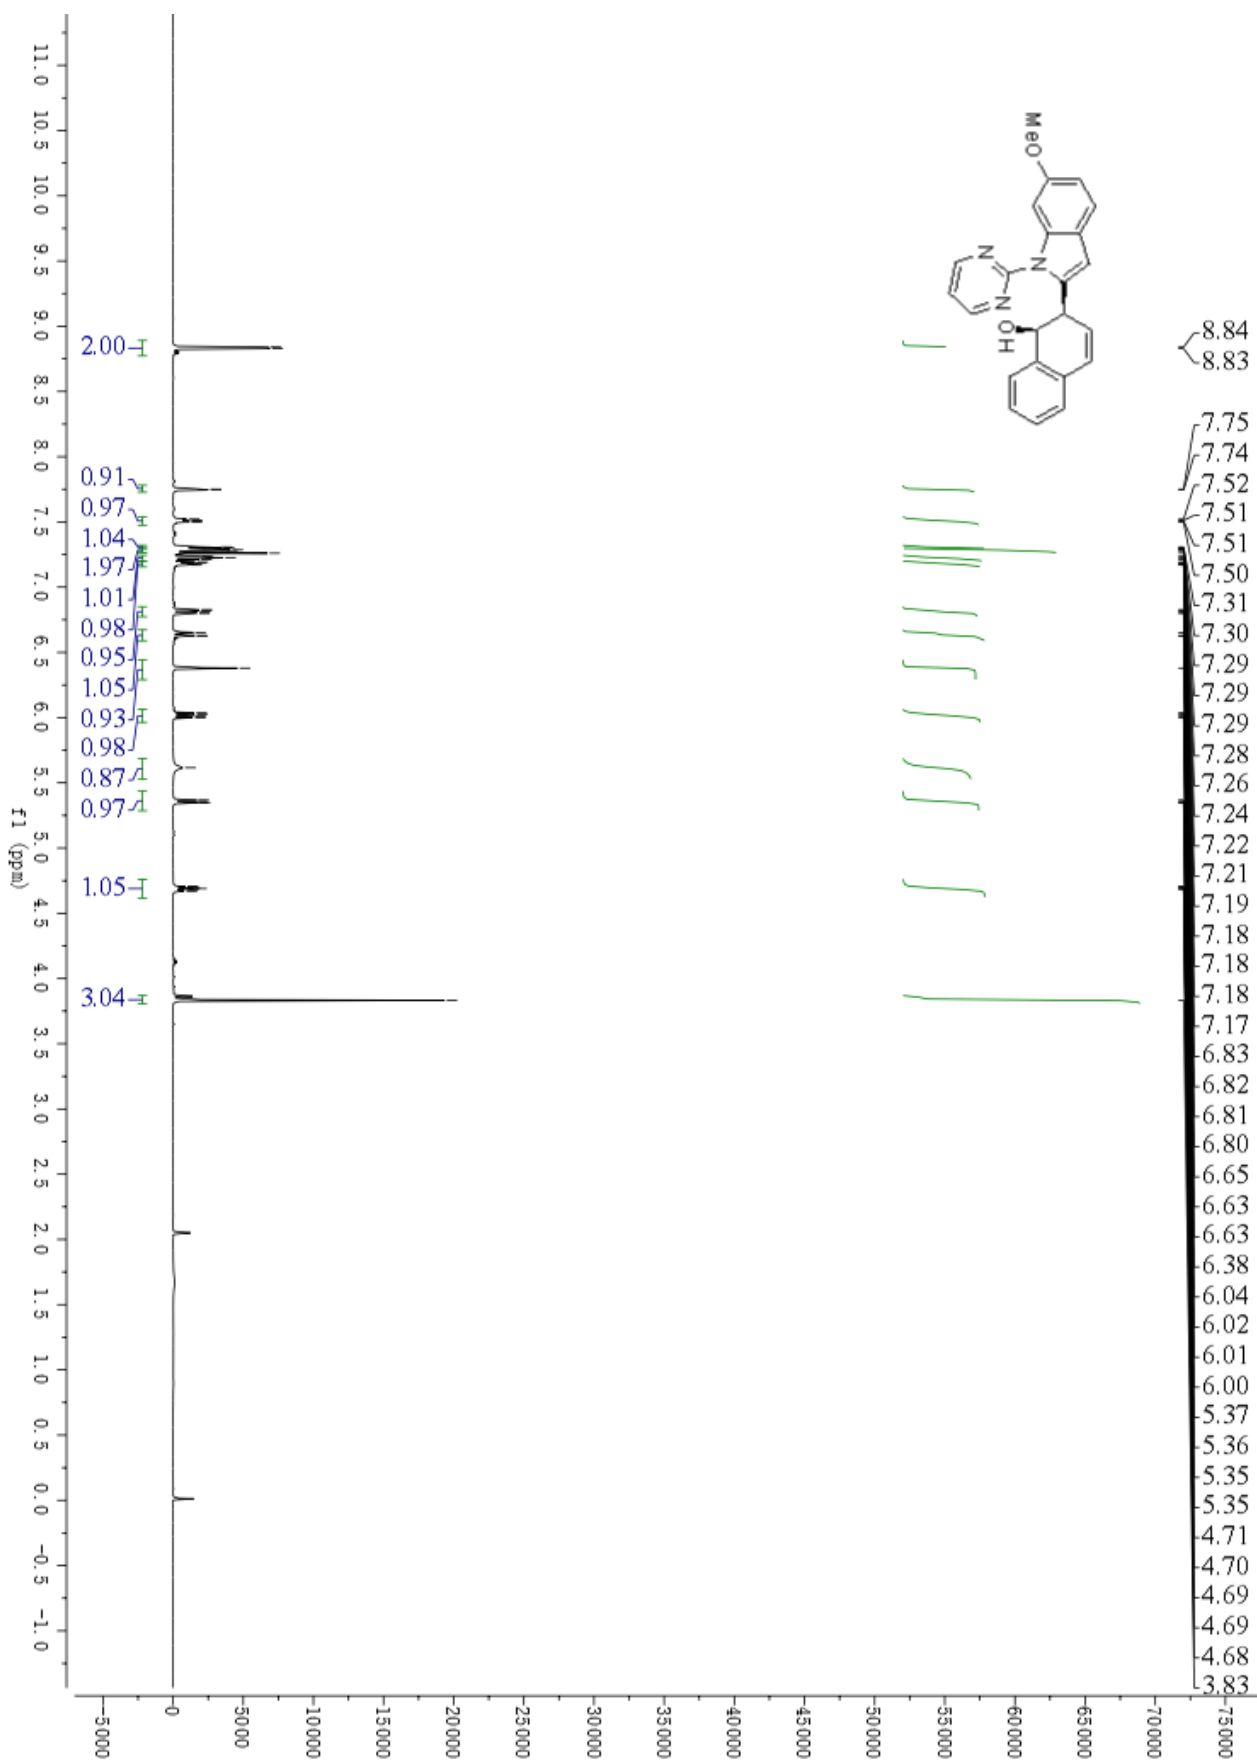

# SUPPLEMENTARY INFORMATION

**Supplementary Fig. 29**  $^{13}\text{C}$  NMR Spectrum of *cis*-3ga

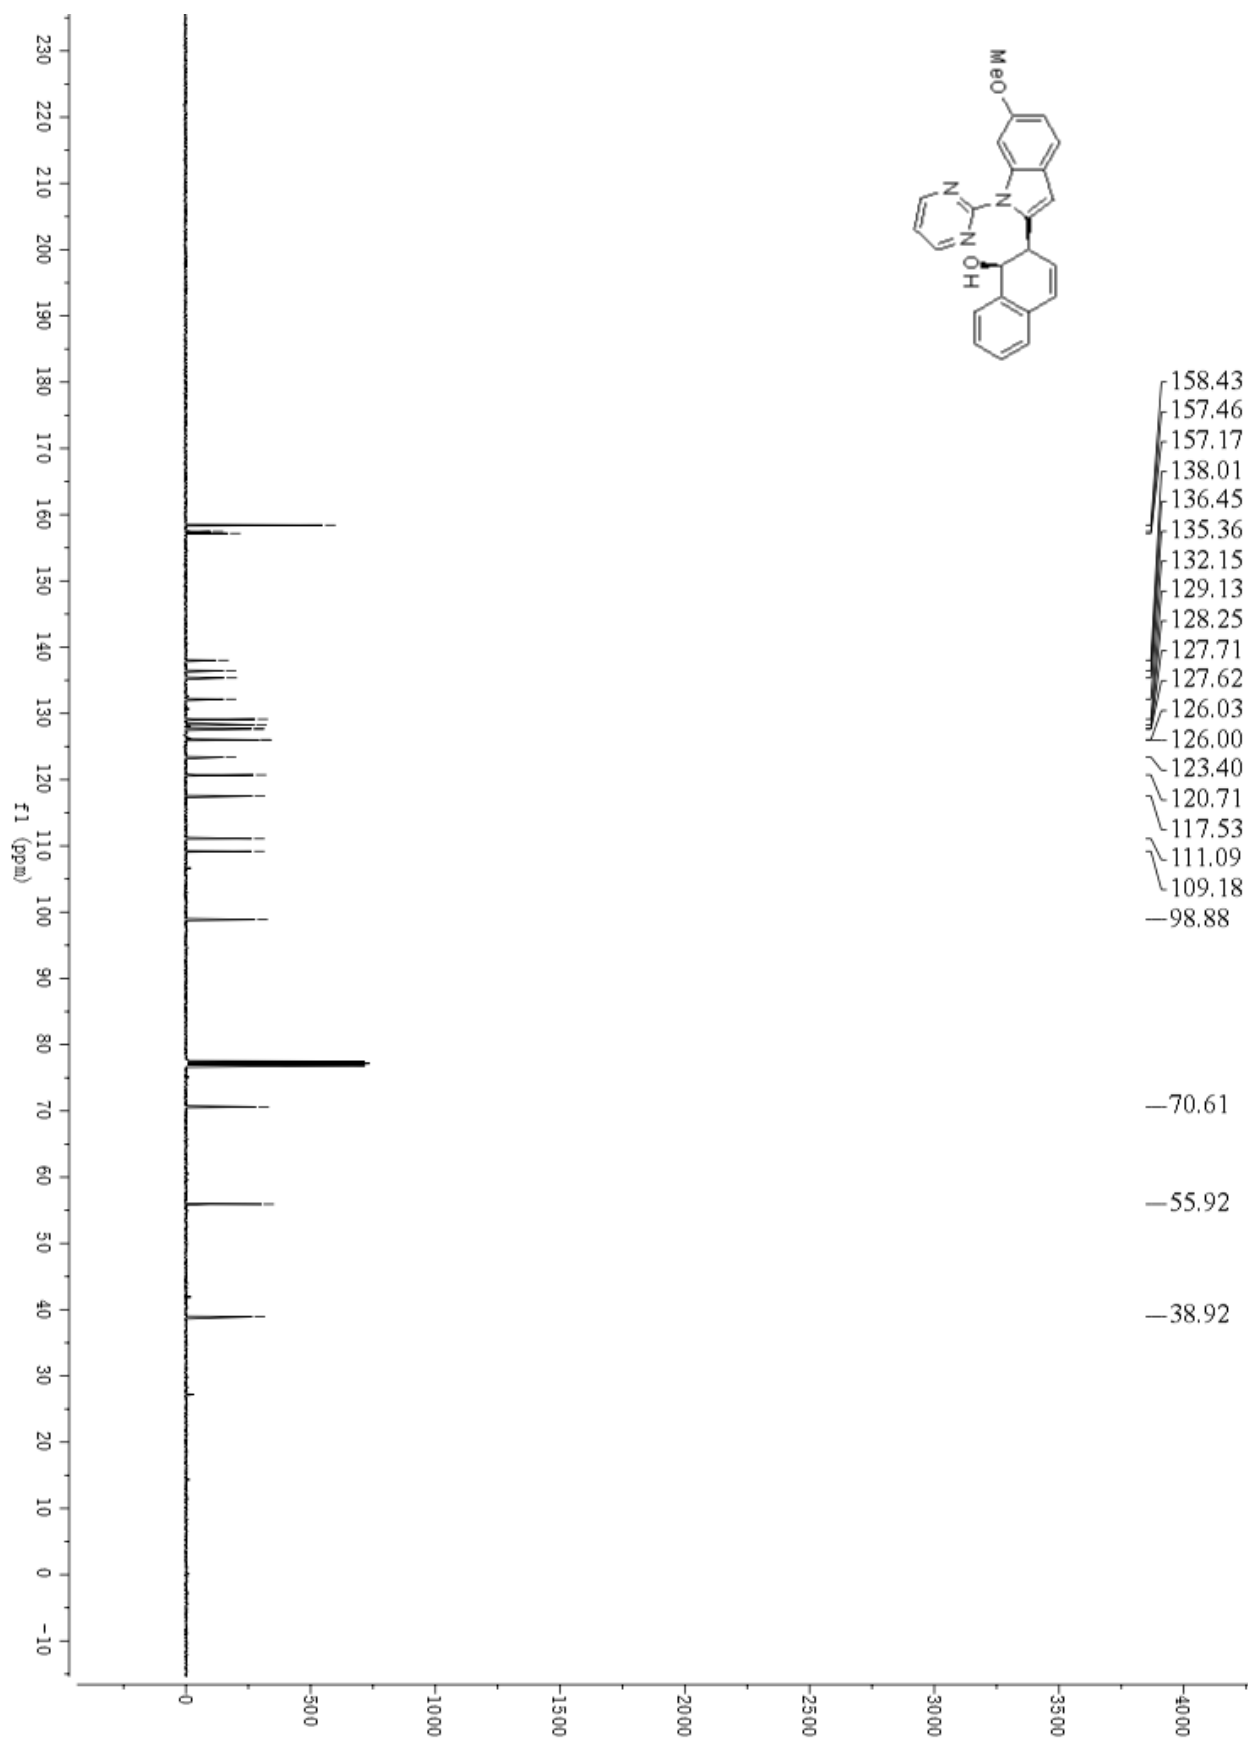



# SUPPLEMENTARY INFORMATION

**Supplementary Fig. 30**  $^1\text{H}$  NMR Spectrum of *cis*-3ha

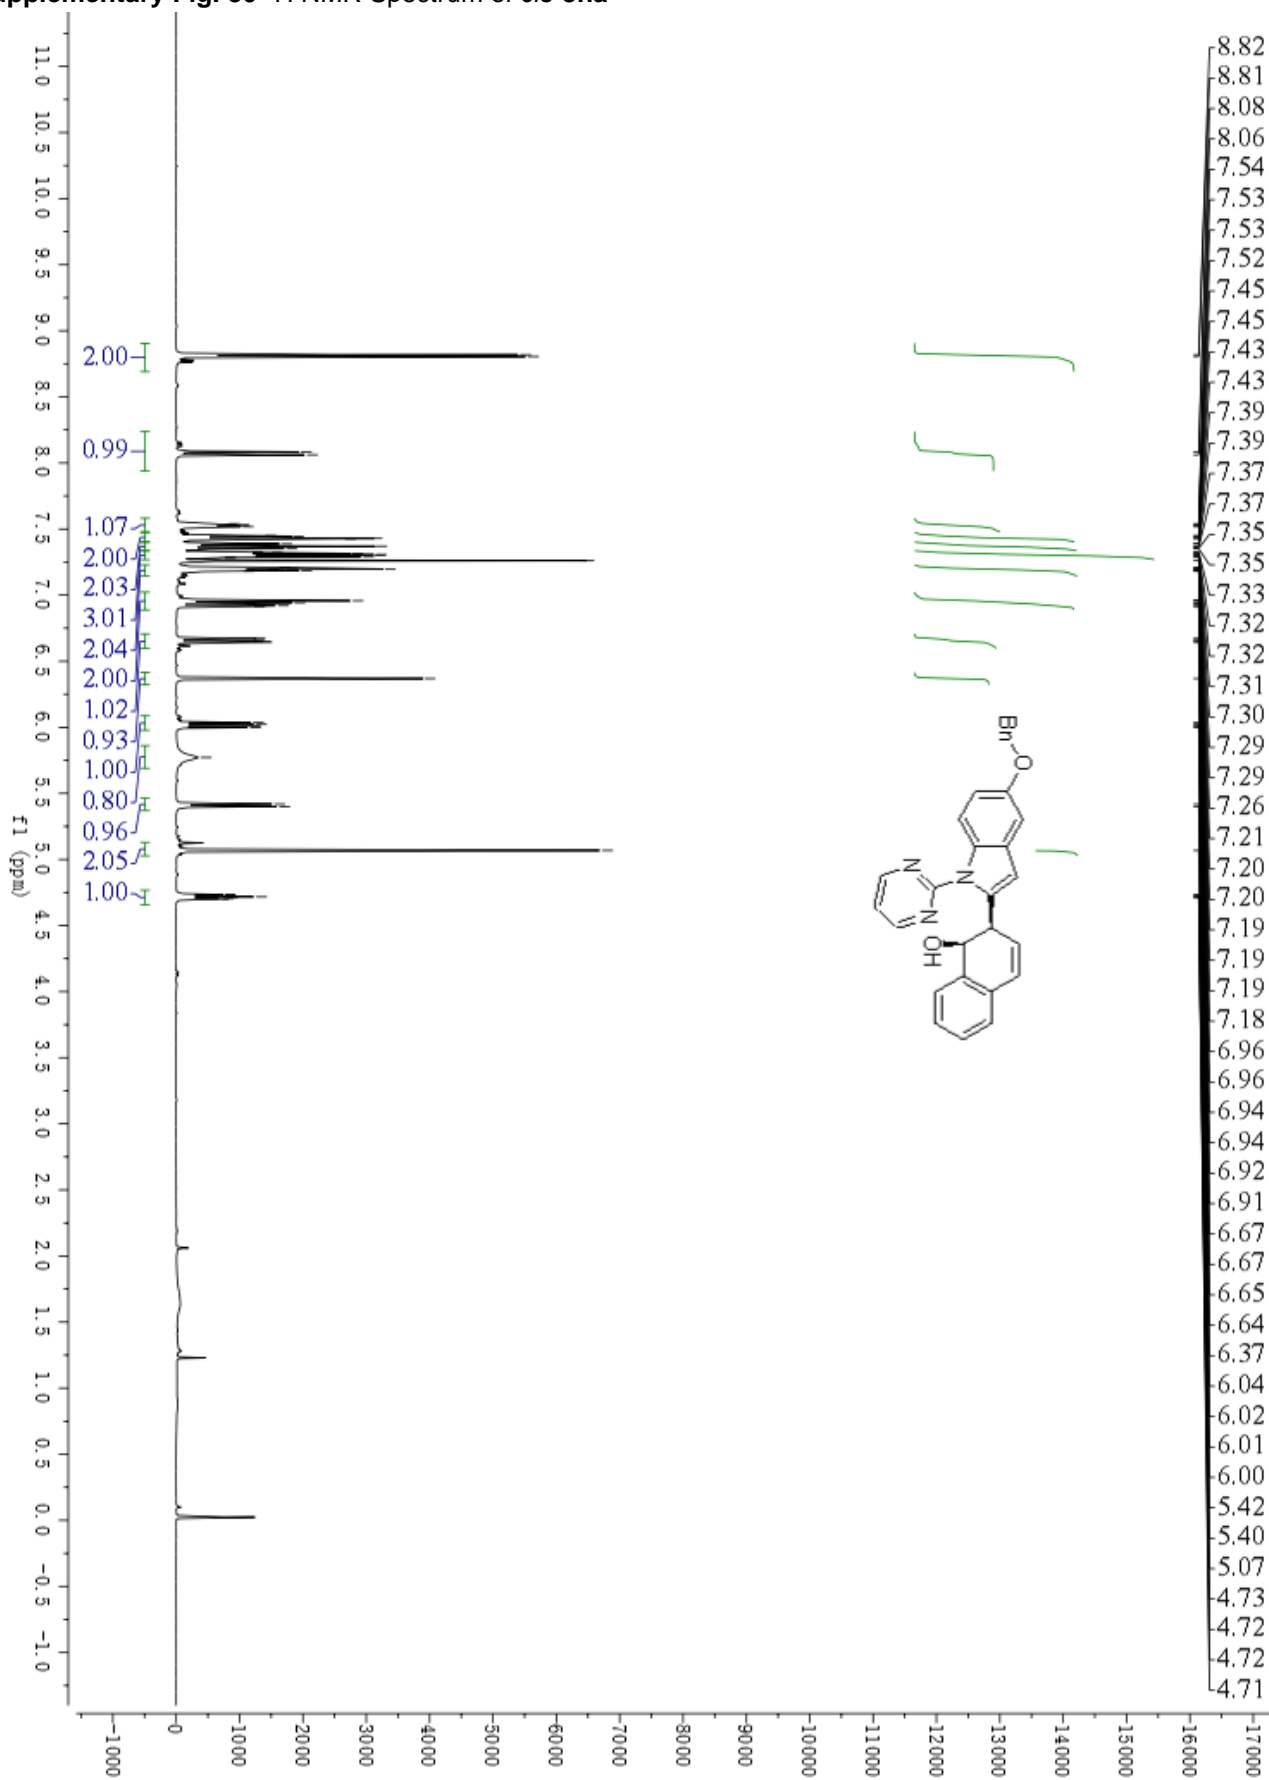

# SUPPLEMENTARY INFORMATION

**Supplementary Fig. 31**  $^{13}\text{C}$  NMR Spectrum of *cis*-3ha

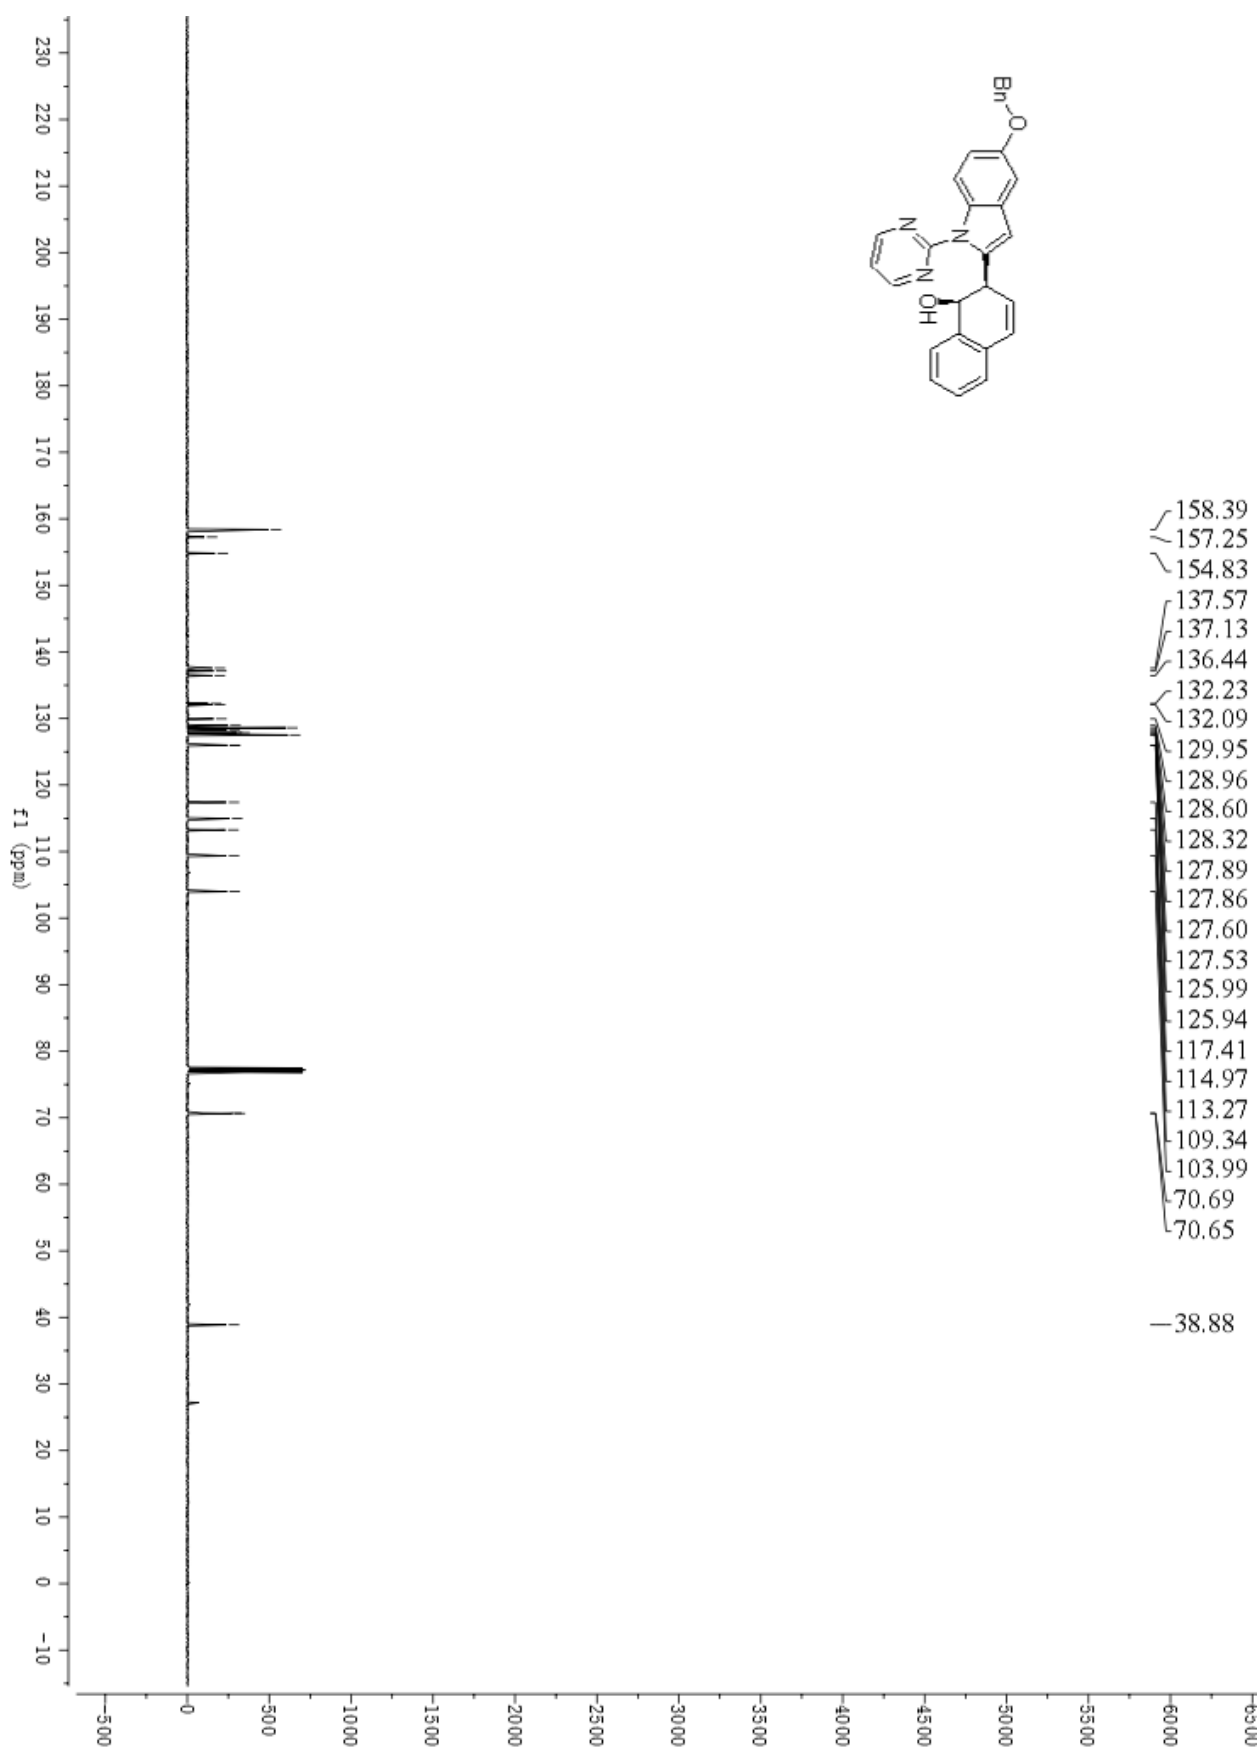

# SUPPLEMENTARY INFORMATION

**Supplementary Fig. 32**  $^1\text{H}$  NMR Spectrum of *cis*-3ia

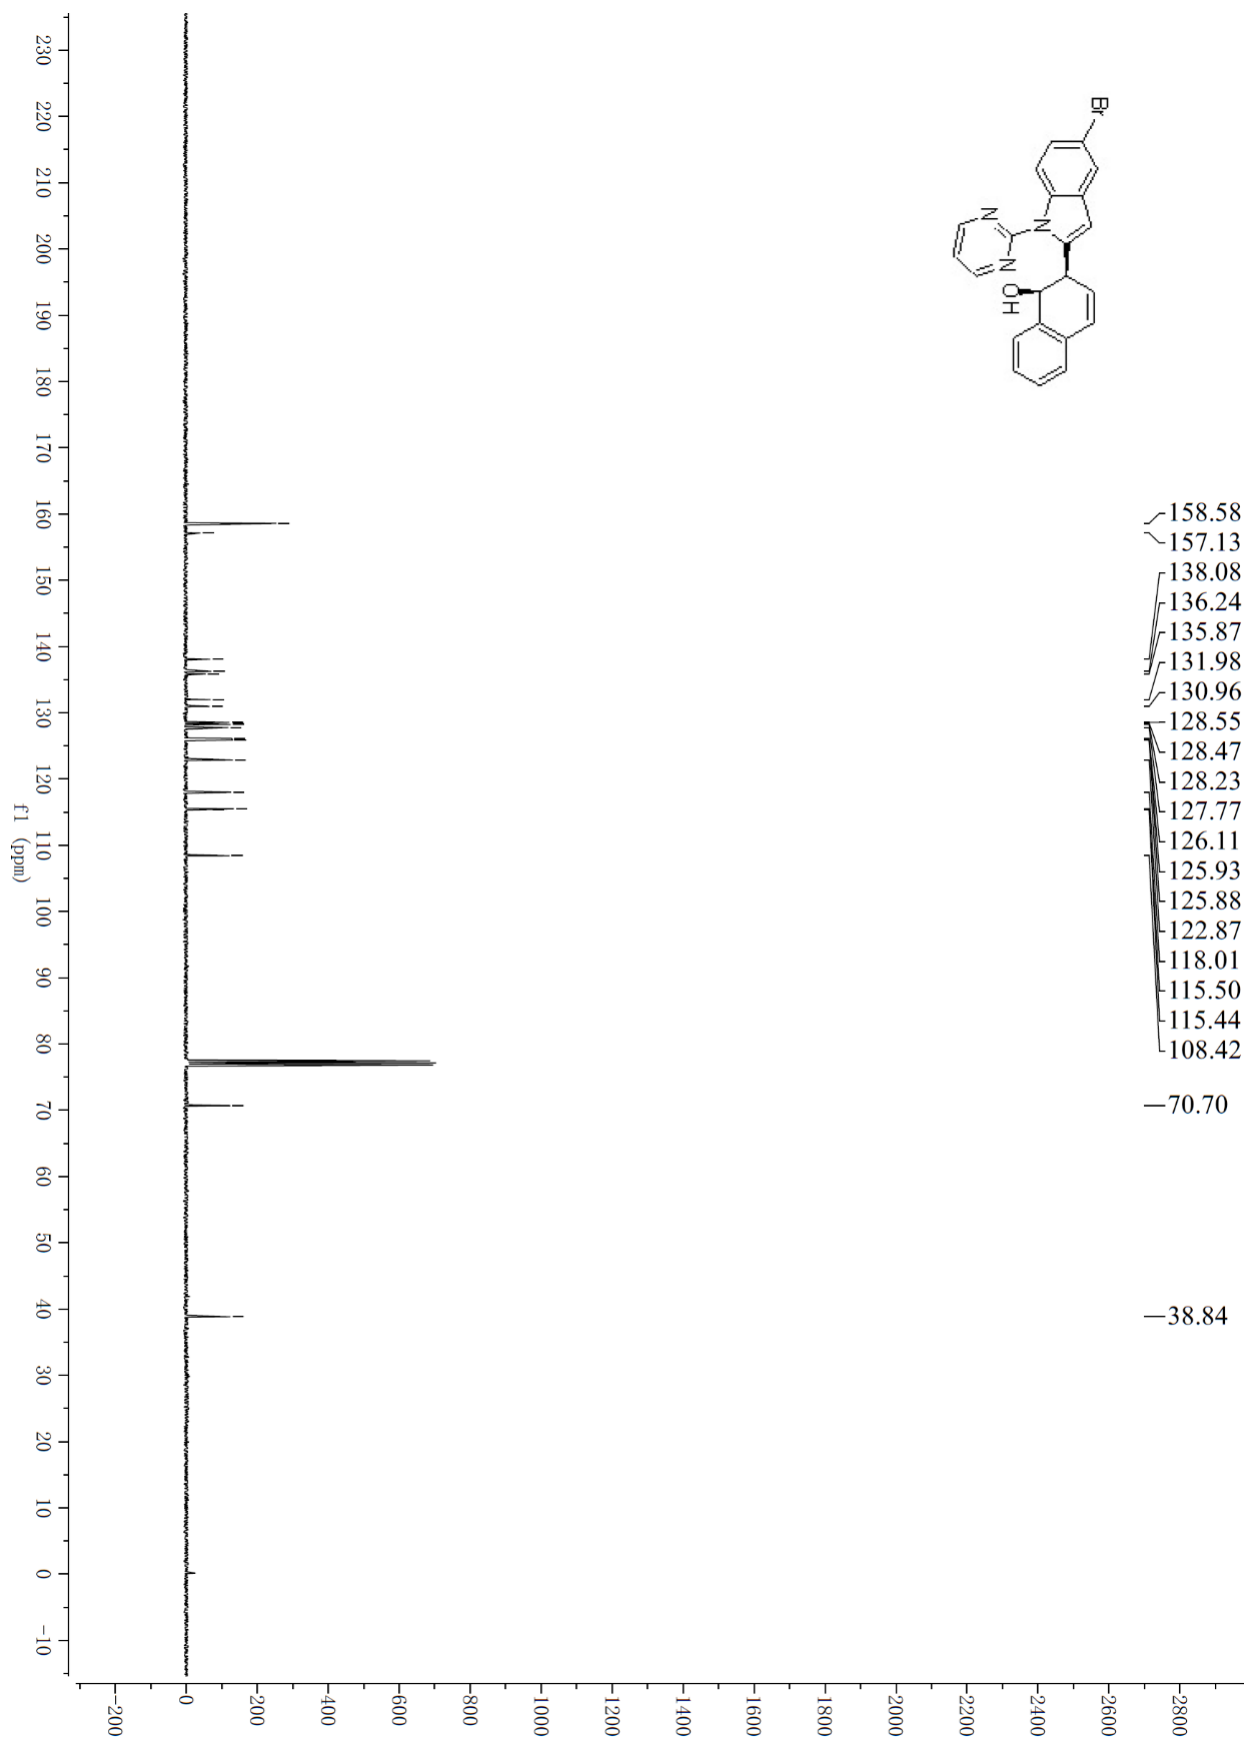

# SUPPLEMENTARY INFORMATION

**Supplementary Fig. 33**  $^{13}\text{C}$  NMR Spectrum of *cis*-3ia

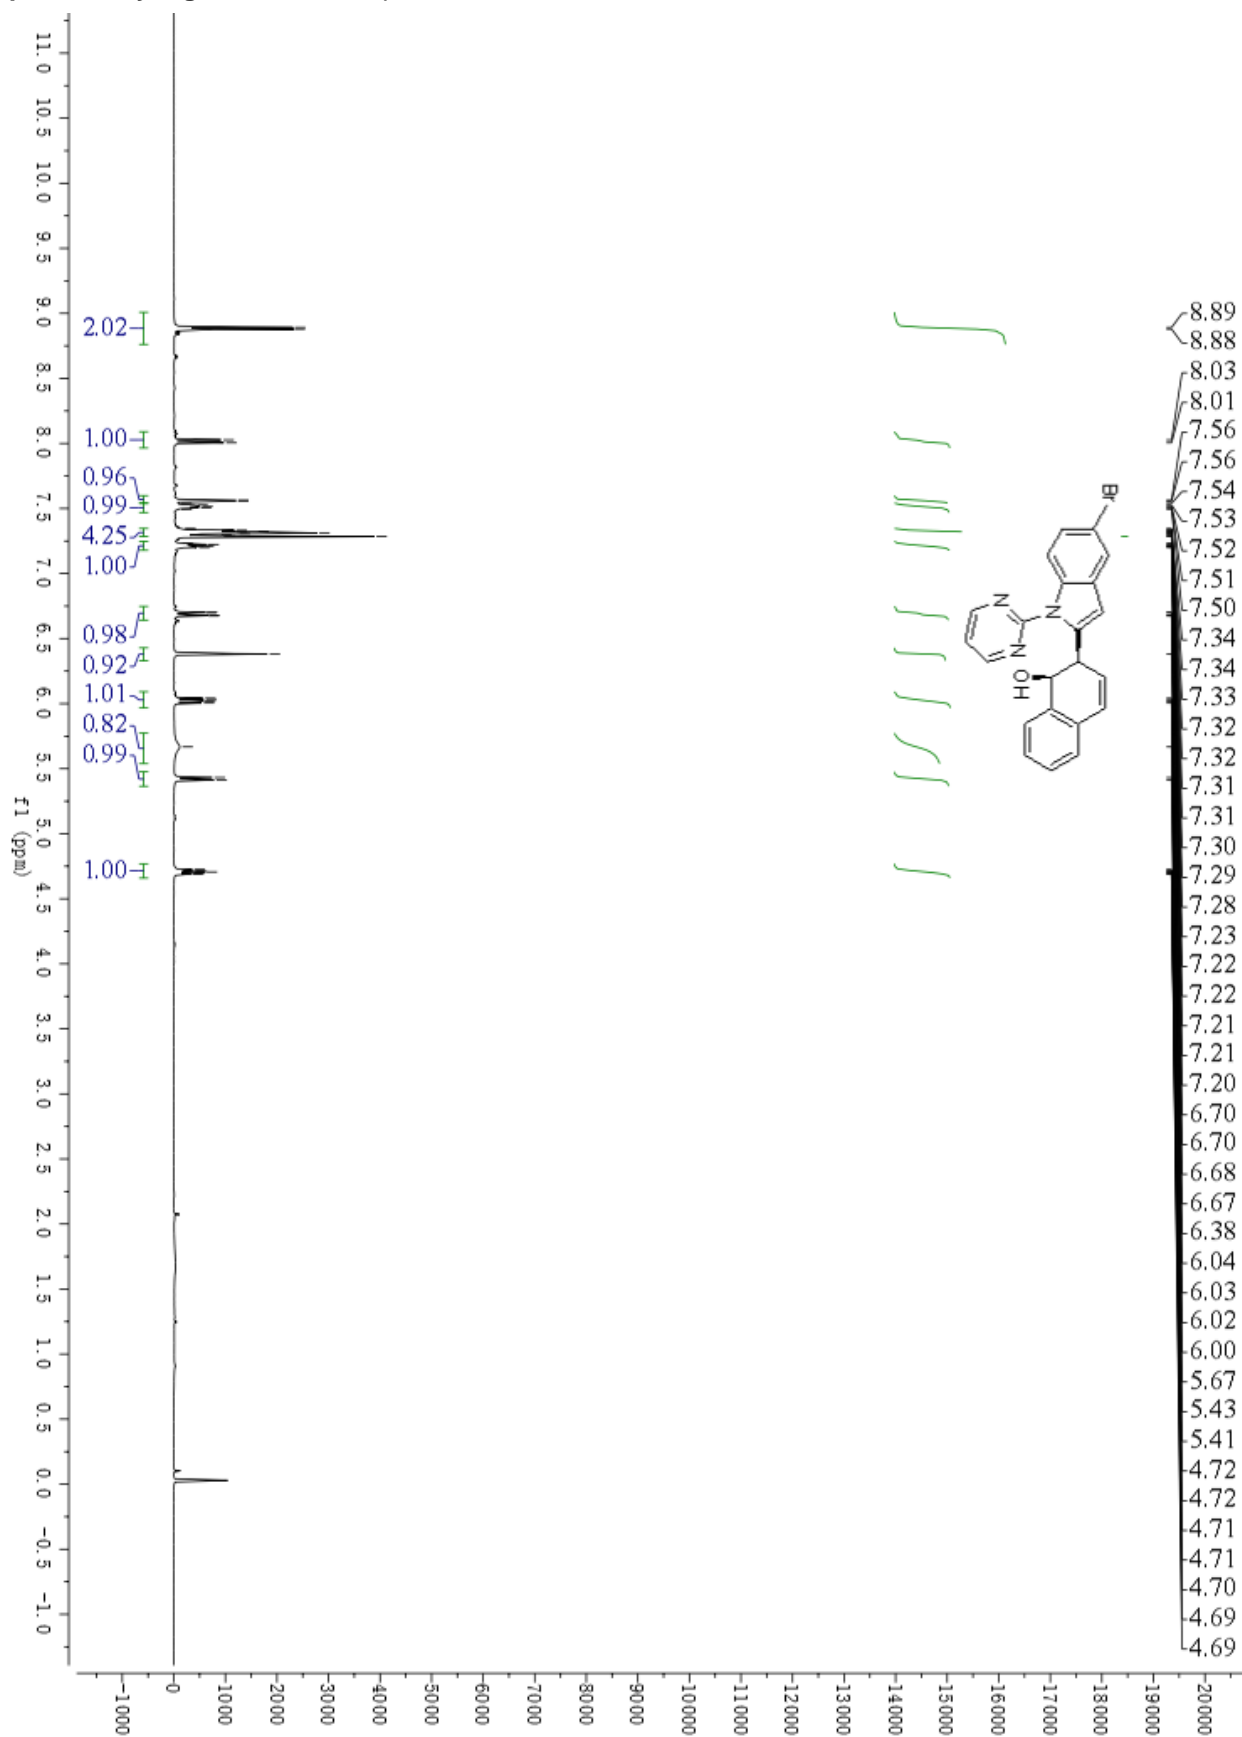

# SUPPLEMENTARY INFORMATION

**Supplementary Fig. 34**  $^1\text{H}$  NMR Spectrum of *cis*-3ja

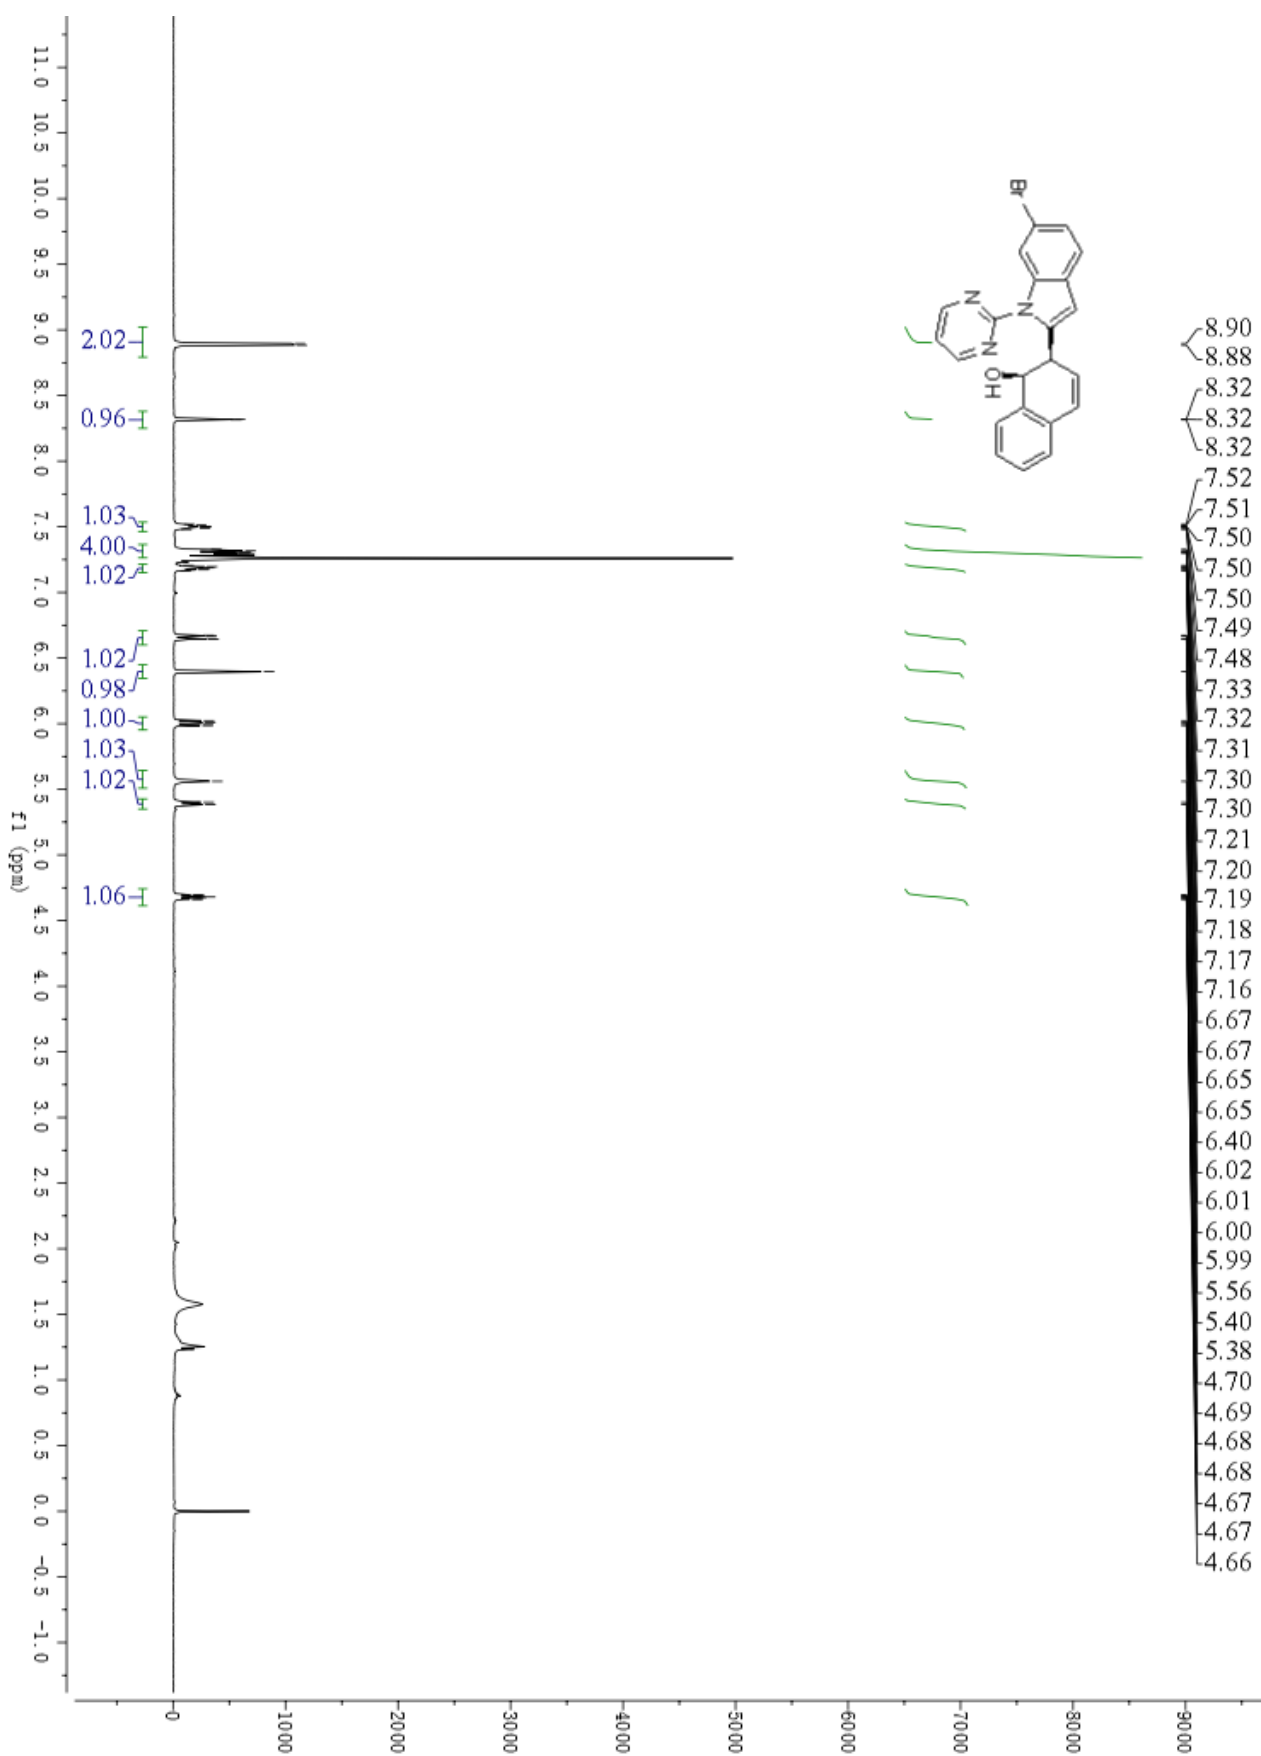

# SUPPLEMENTARY INFORMATION

**Supplementary Fig. 35**  $^{13}\text{C}$  NMR Spectrum of *cis*-3ja

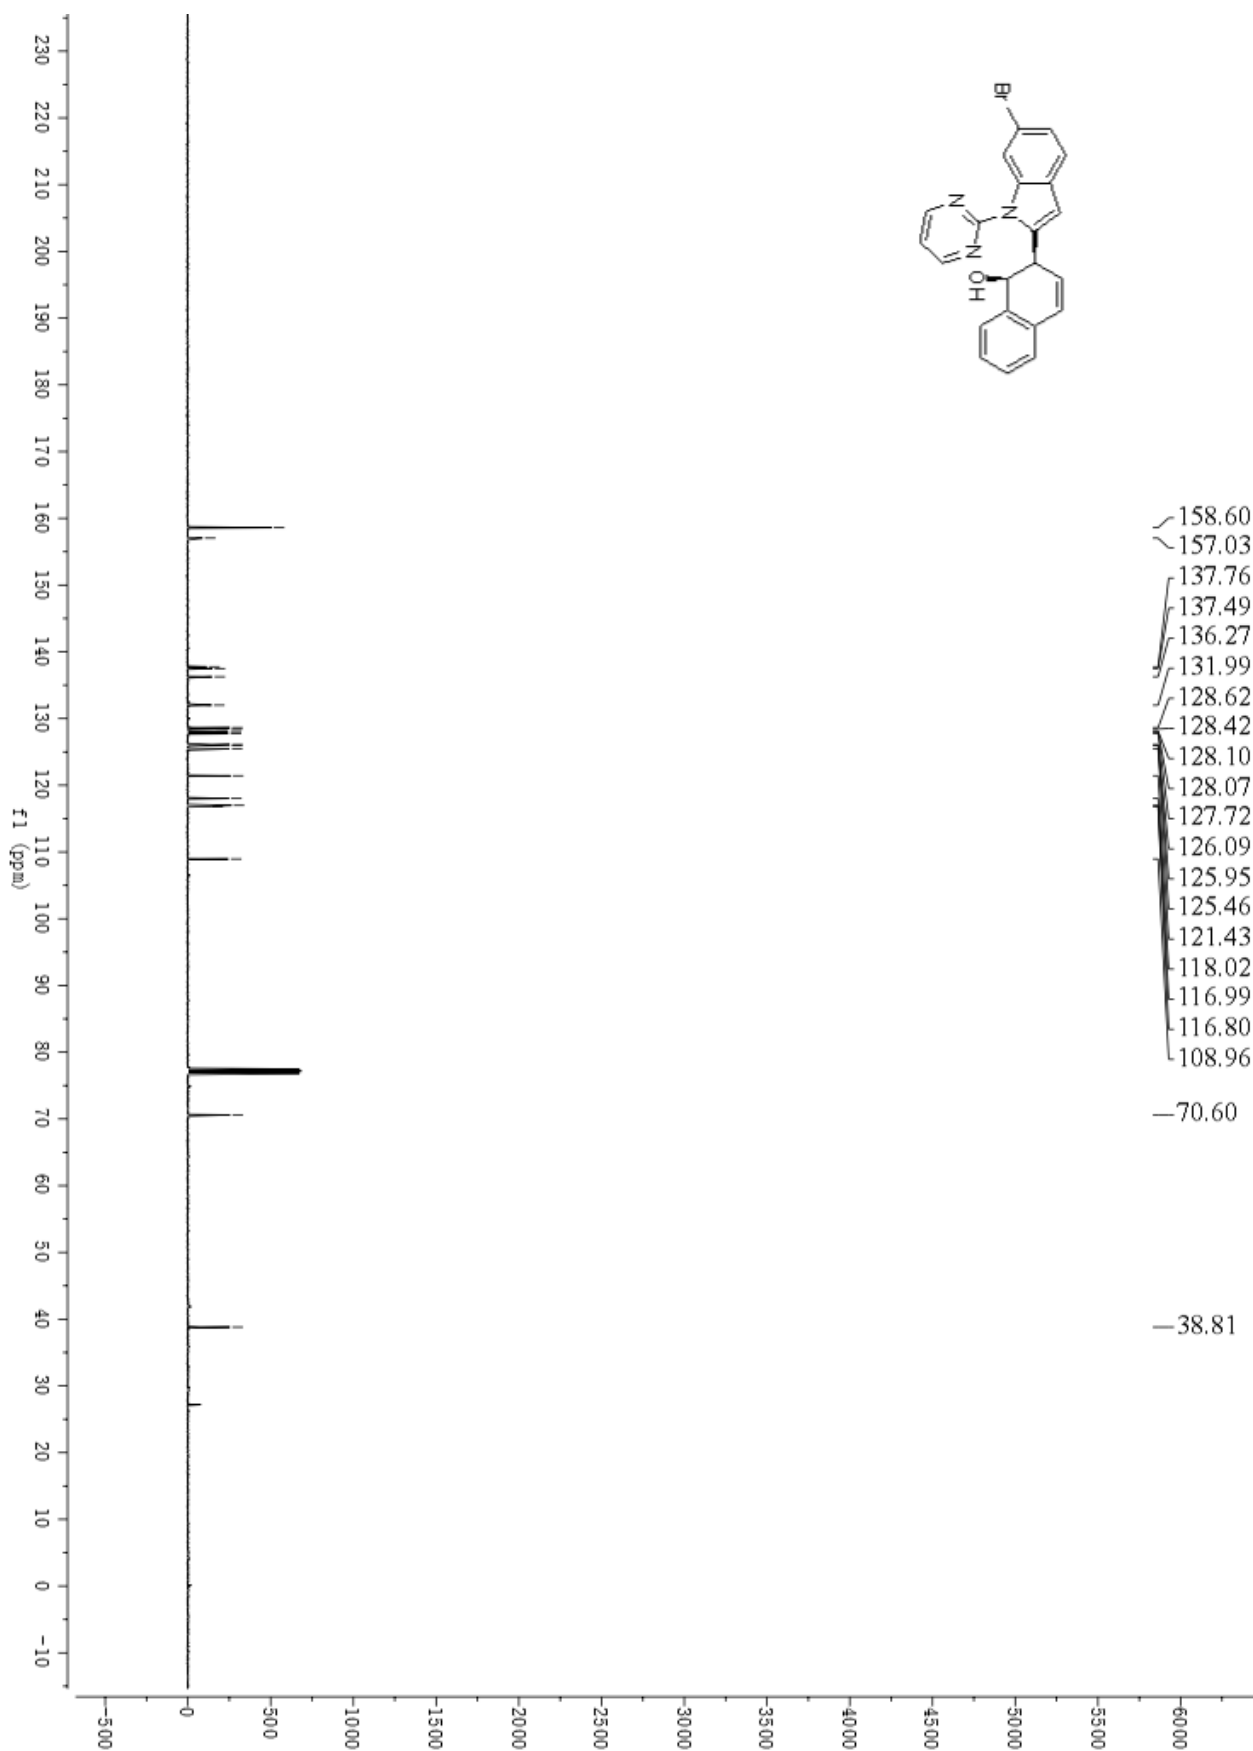

# SUPPLEMENTARY INFORMATION

**Supplementary Fig. 36**  $^1\text{H}$  NMR Spectrum of *cis*-3ka

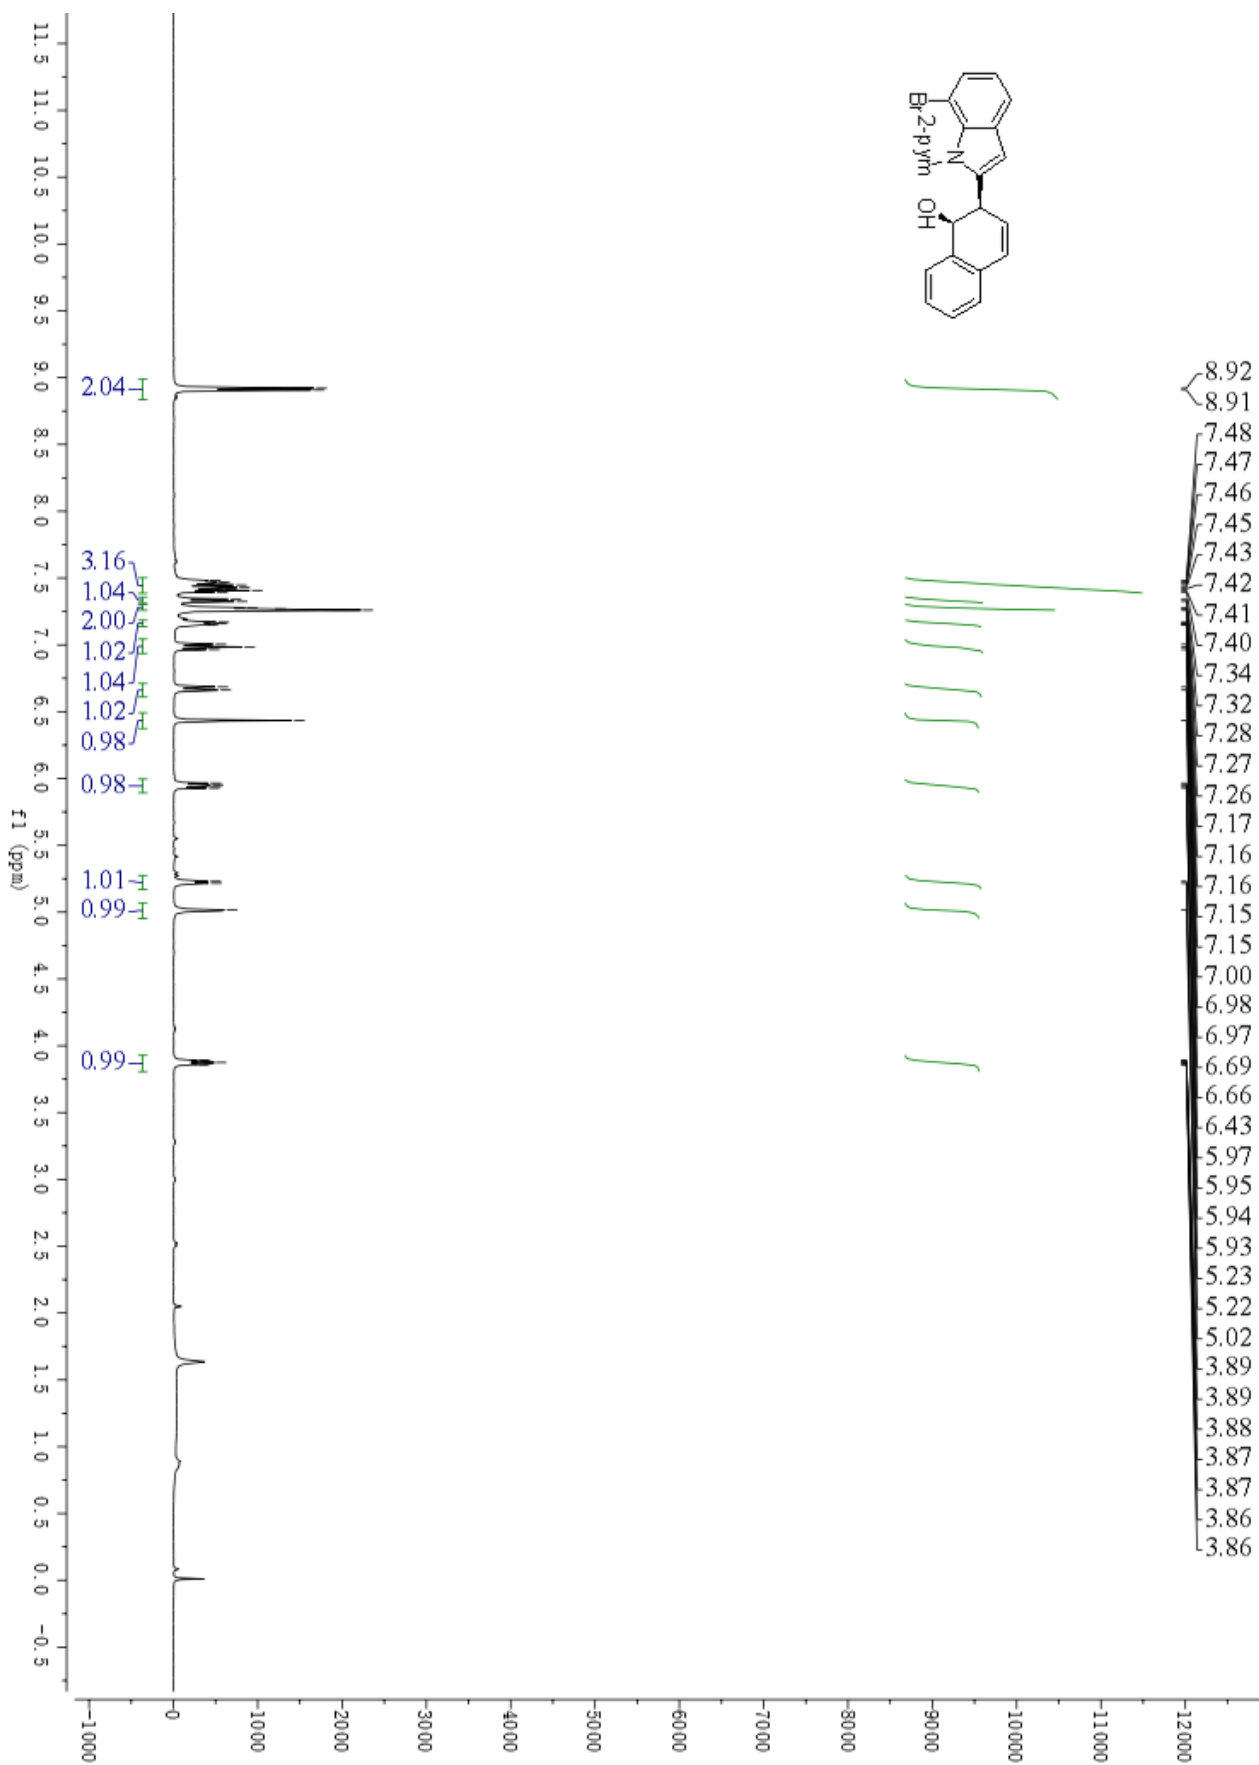

# SUPPLEMENTARY INFORMATION

**Supplementary Fig. 37**  $^{13}\text{C}$  NMR Spectrum of *cis*-3ka

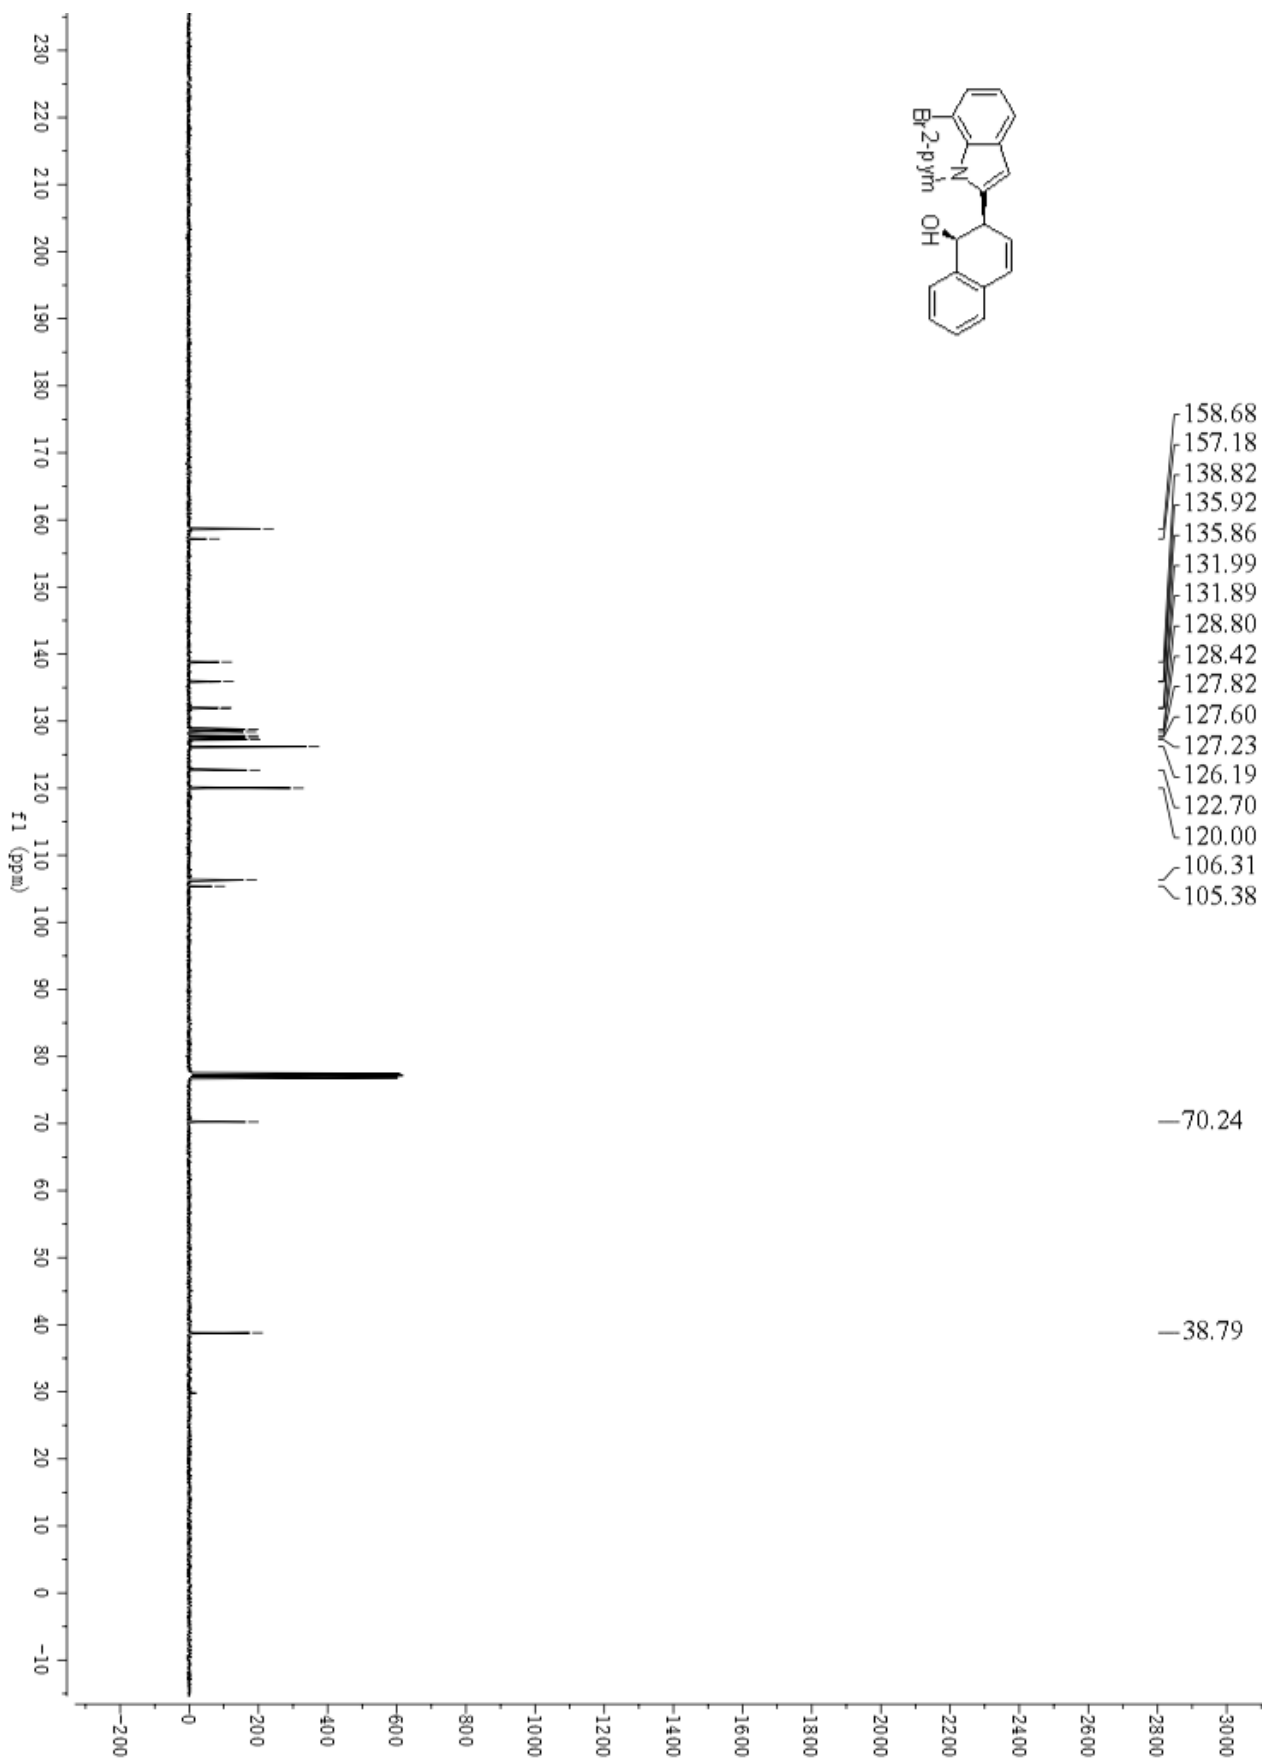



# SUPPLEMENTARY INFORMATION

**Supplementary Fig. 38**  $^1\text{H}$  NMR Spectrum of *cis*-3la

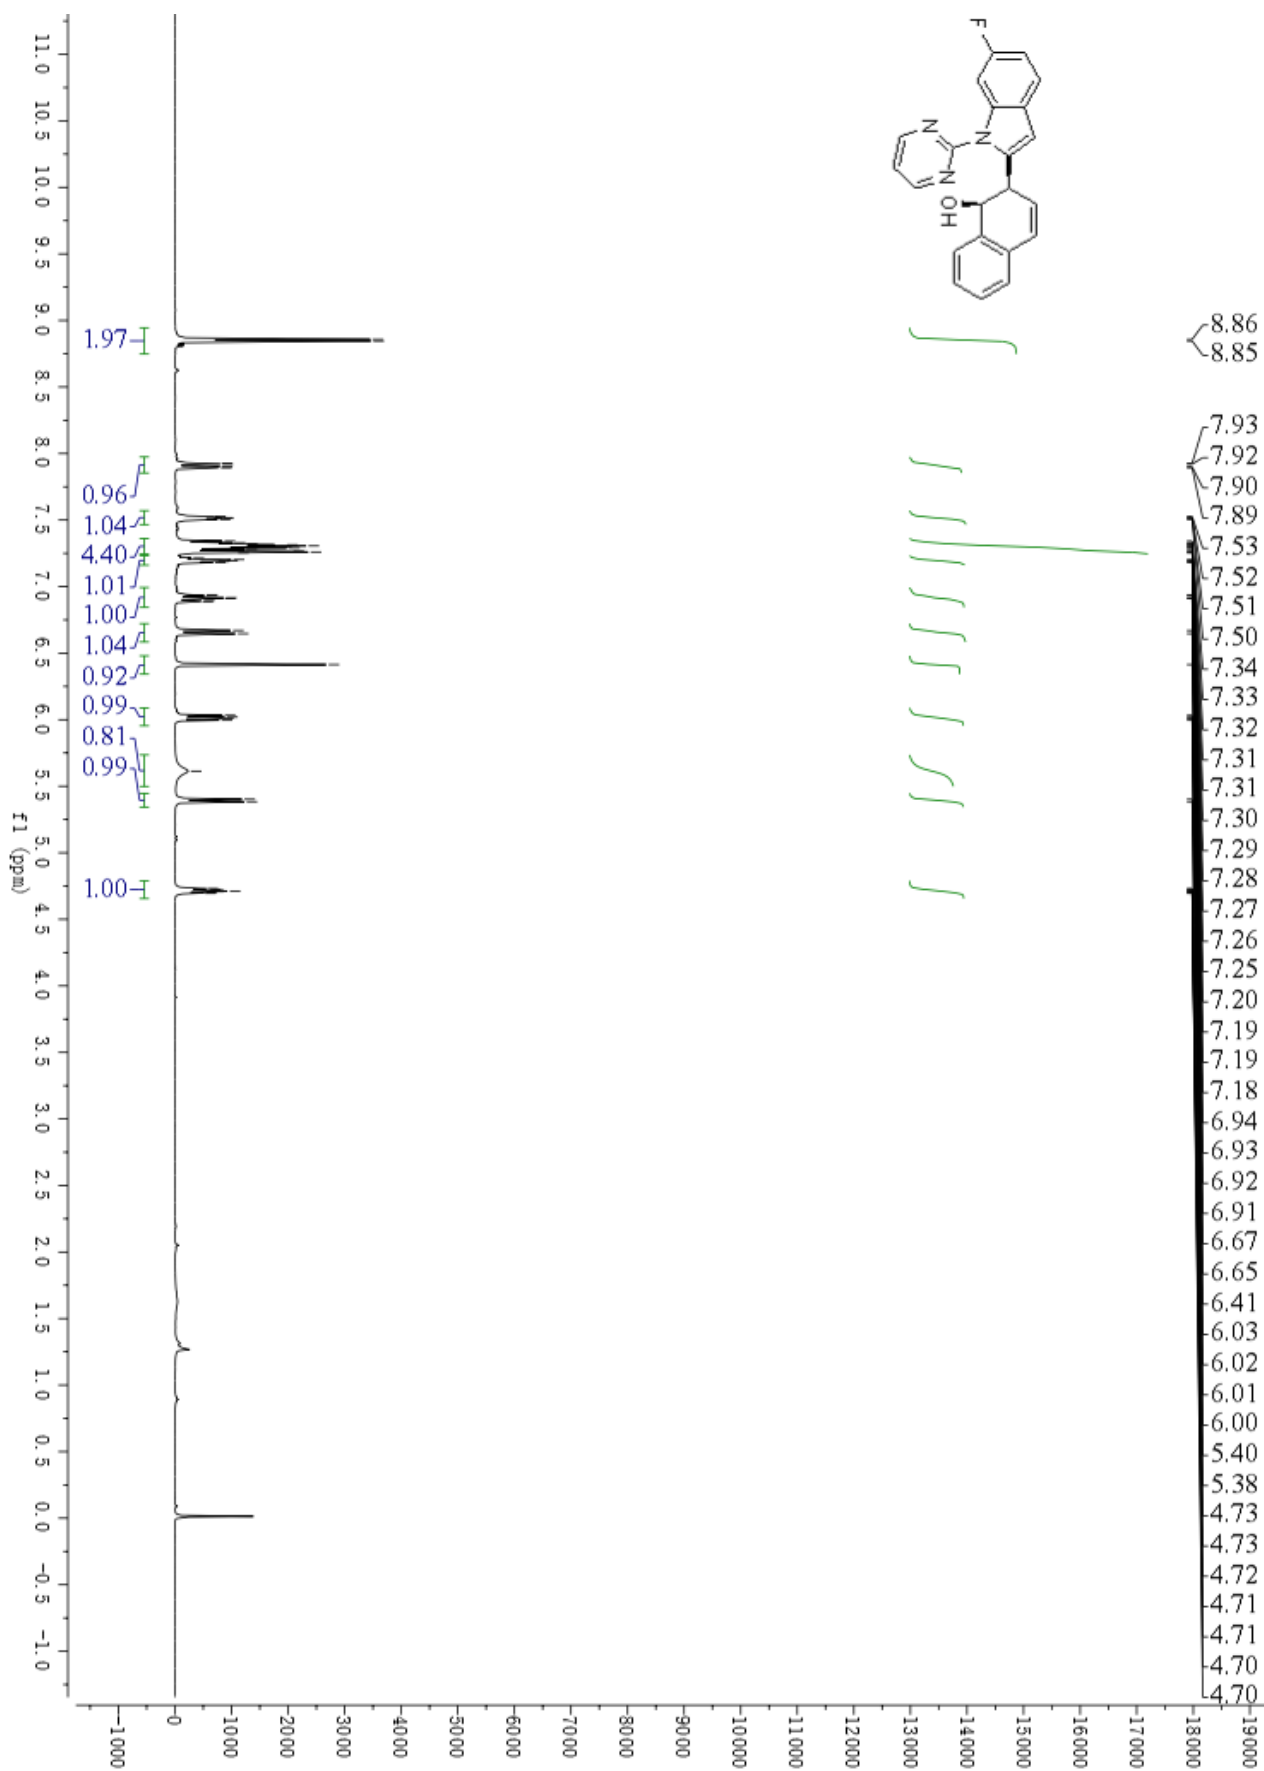

# SUPPLEMENTARY INFORMATION

**Supplementary Fig. 39**  $^{13}\text{C}$  NMR Spectrum of *cis*-3la

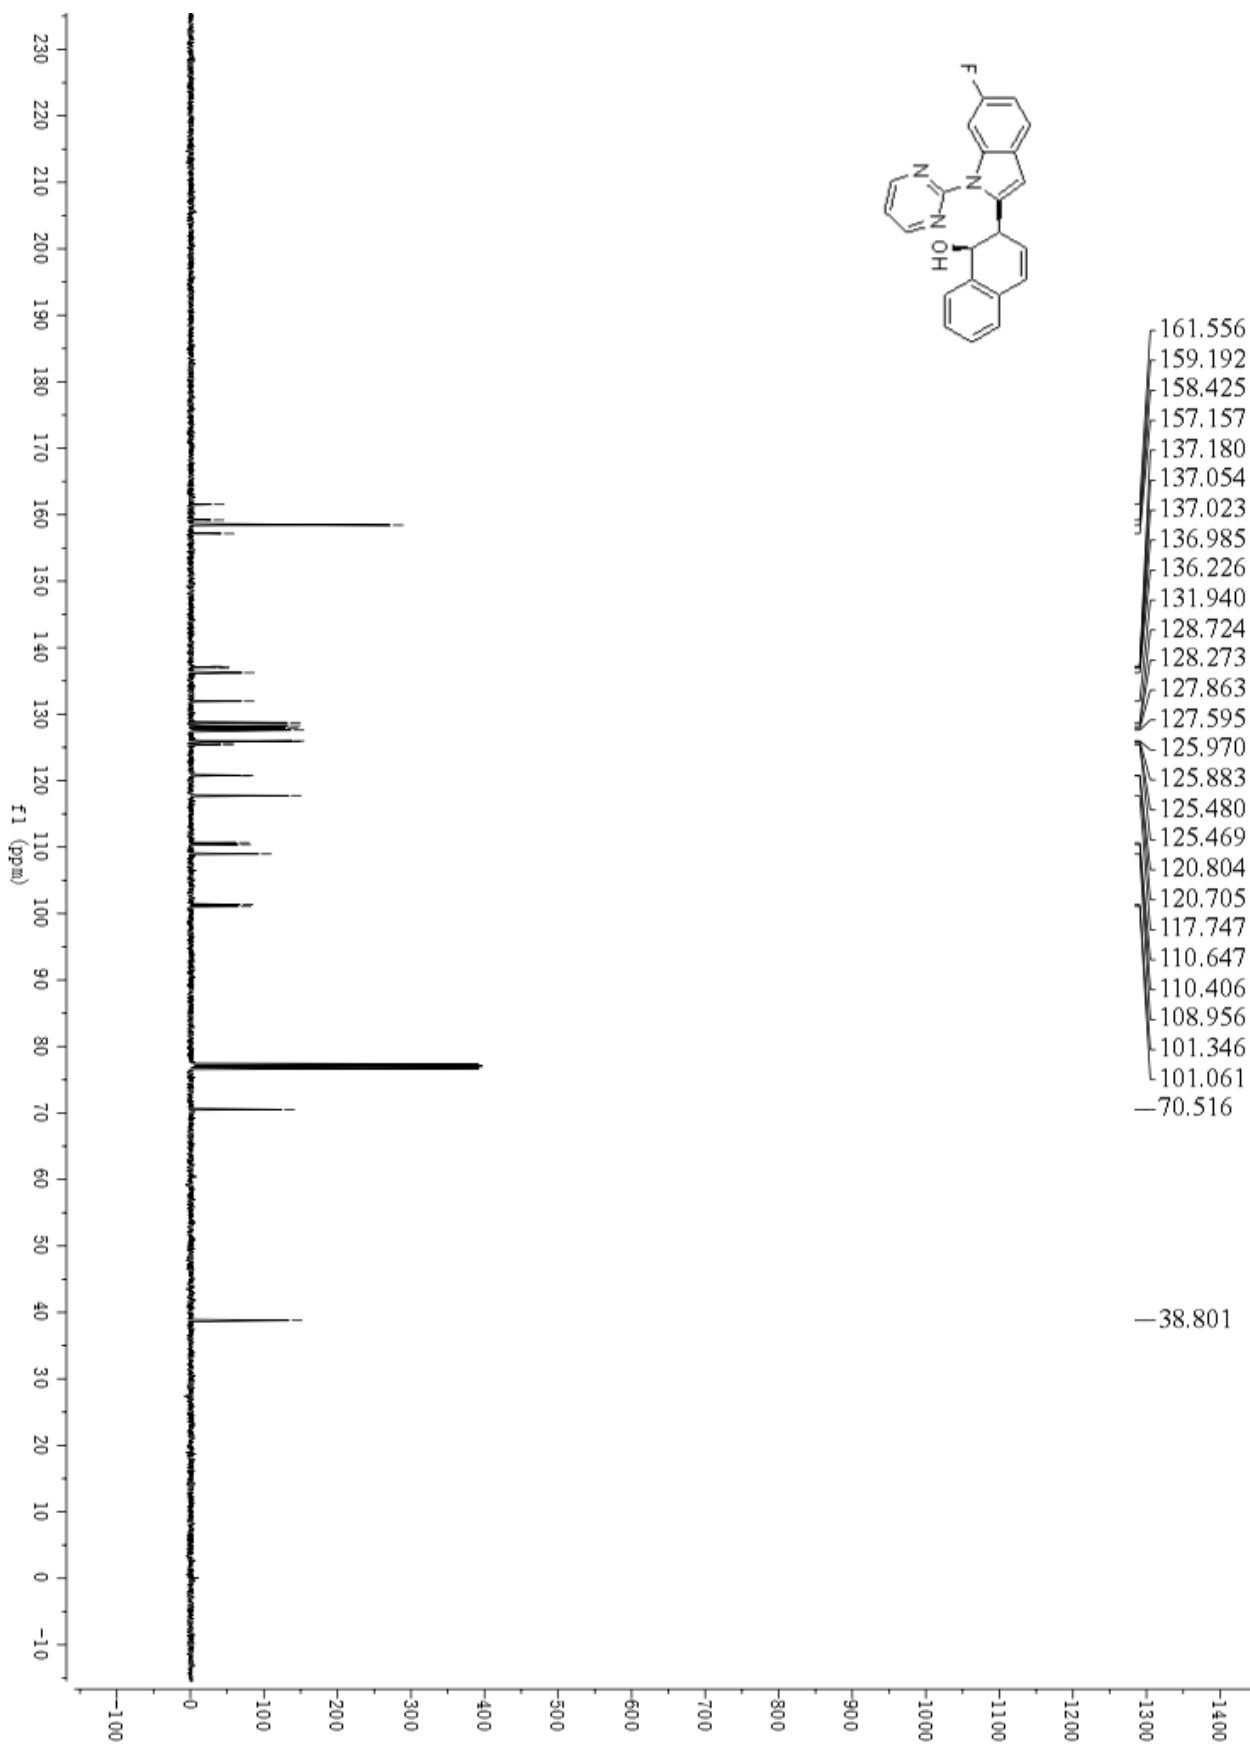

# SUPPLEMENTARY INFORMATION

**Supplementary Fig. 40**  $^{19}\text{F}$  NMR Spectrum of *cis*-3la

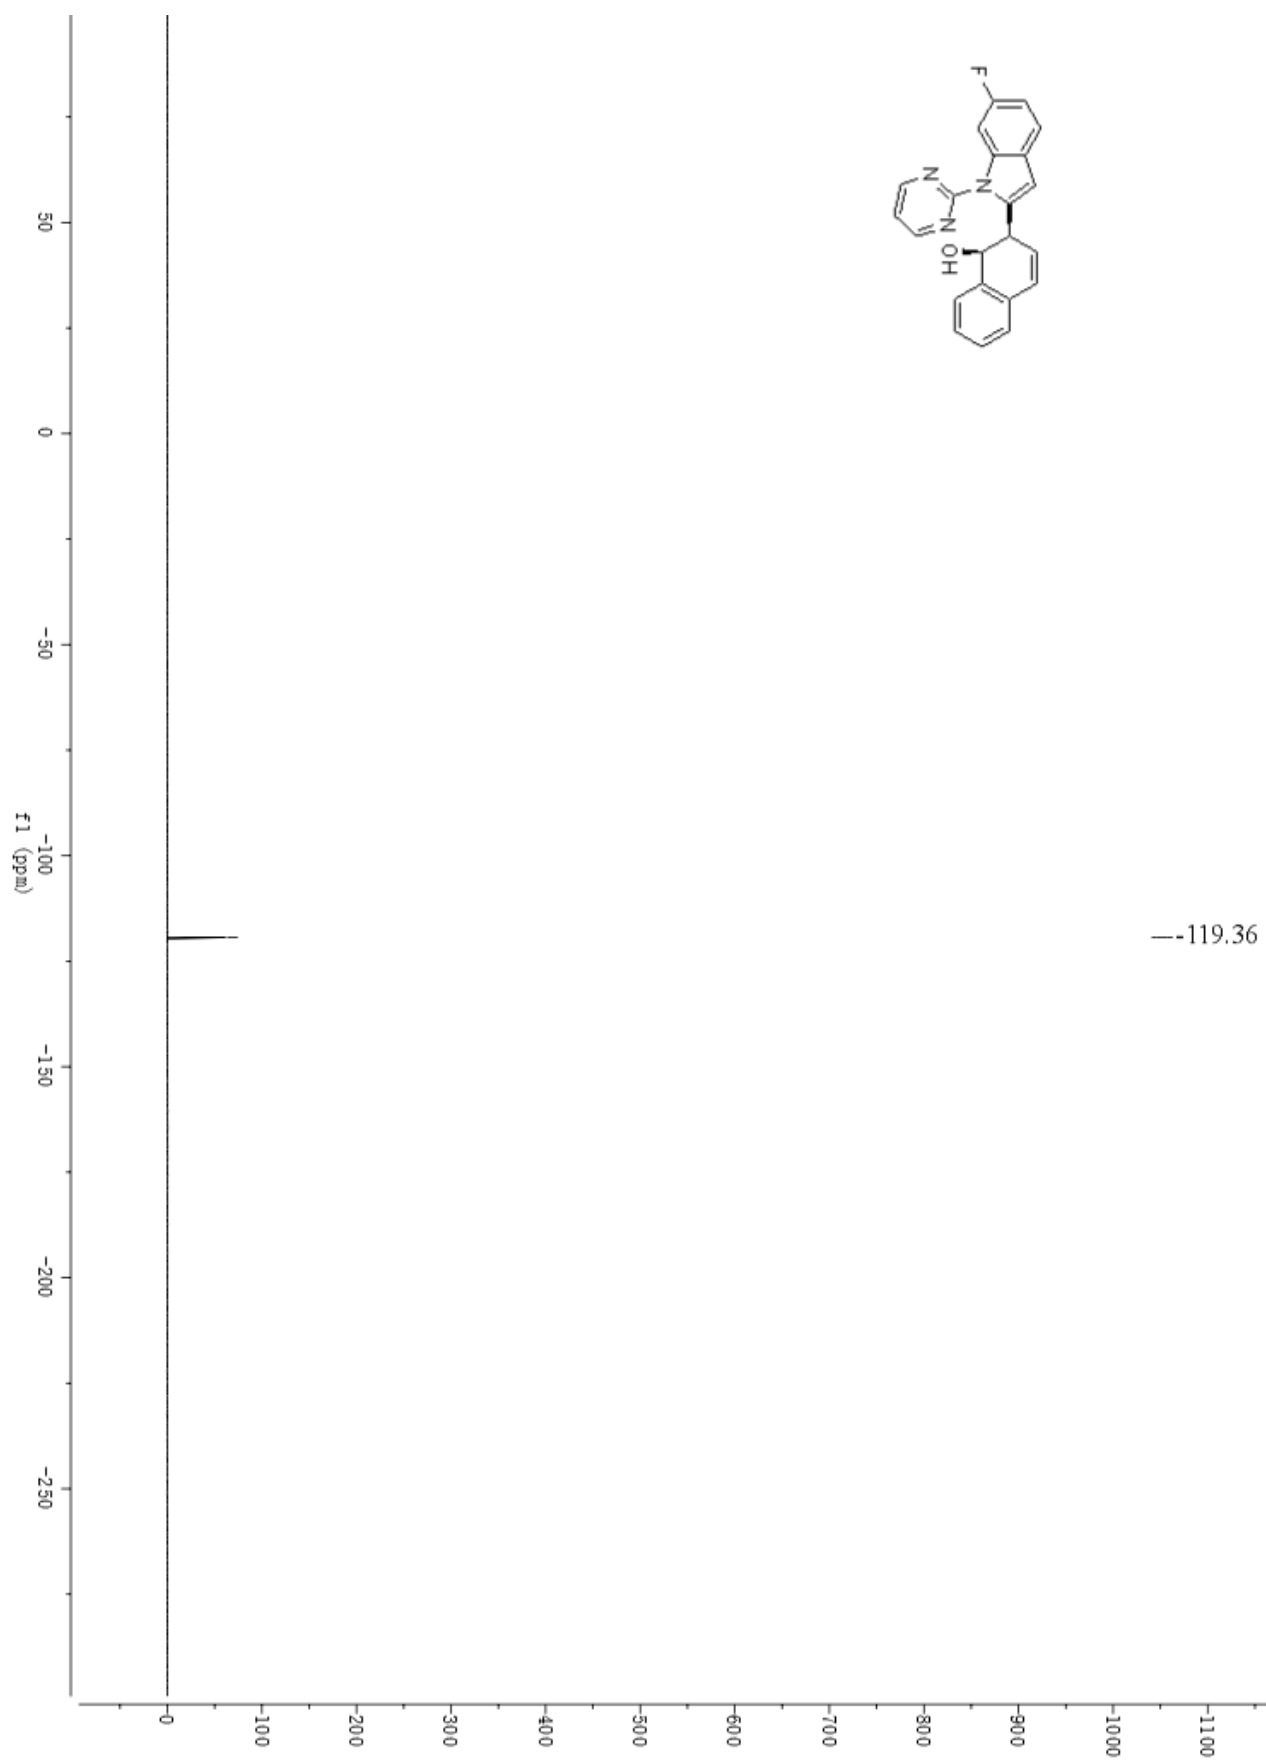

# SUPPLEMENTARY INFORMATION

**Supplementary Fig. 41**  $^1\text{H}$  NMR Spectrum of *cis*-3ma

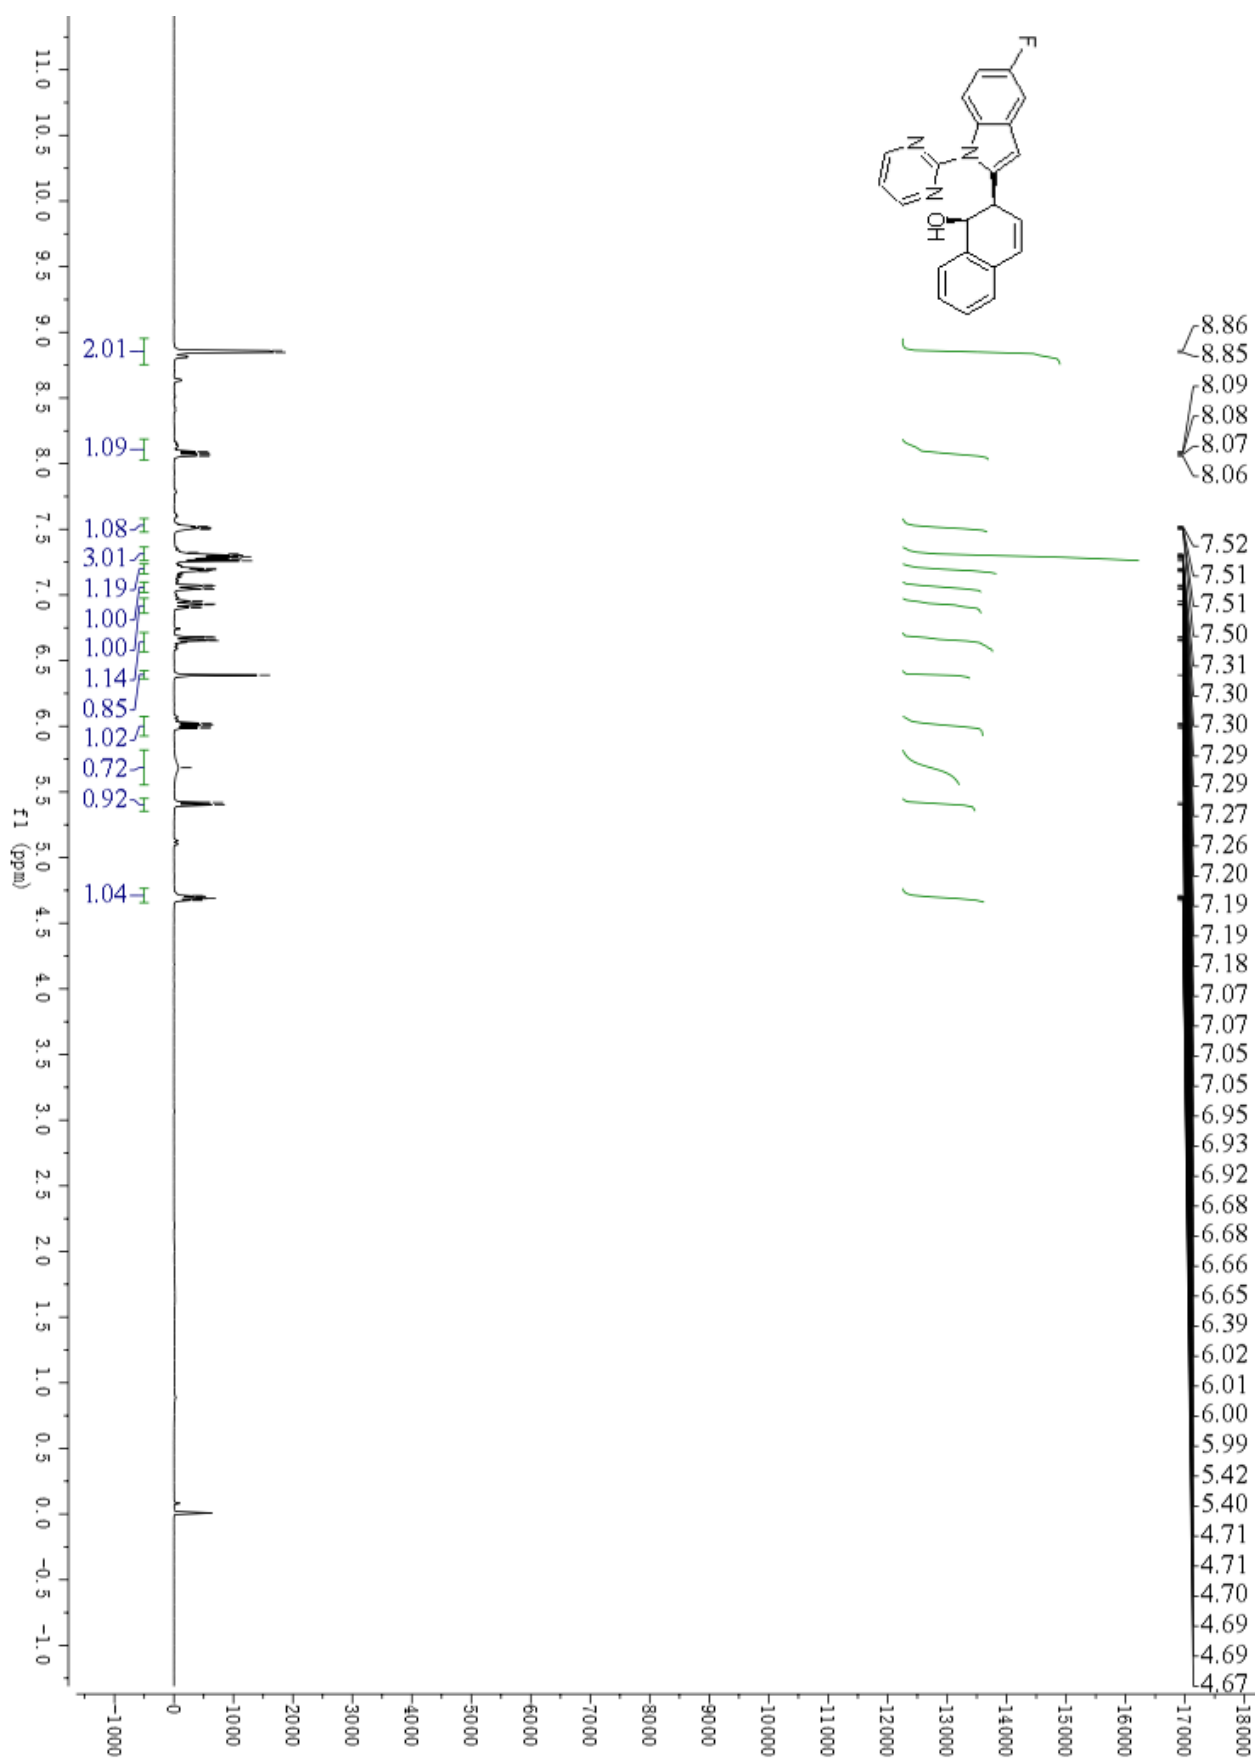

# SUPPLEMENTARY INFORMATION

**Supplementary Fig. 42**  $^{13}\text{C}$  NMR Spectrum of *cis*-3ma

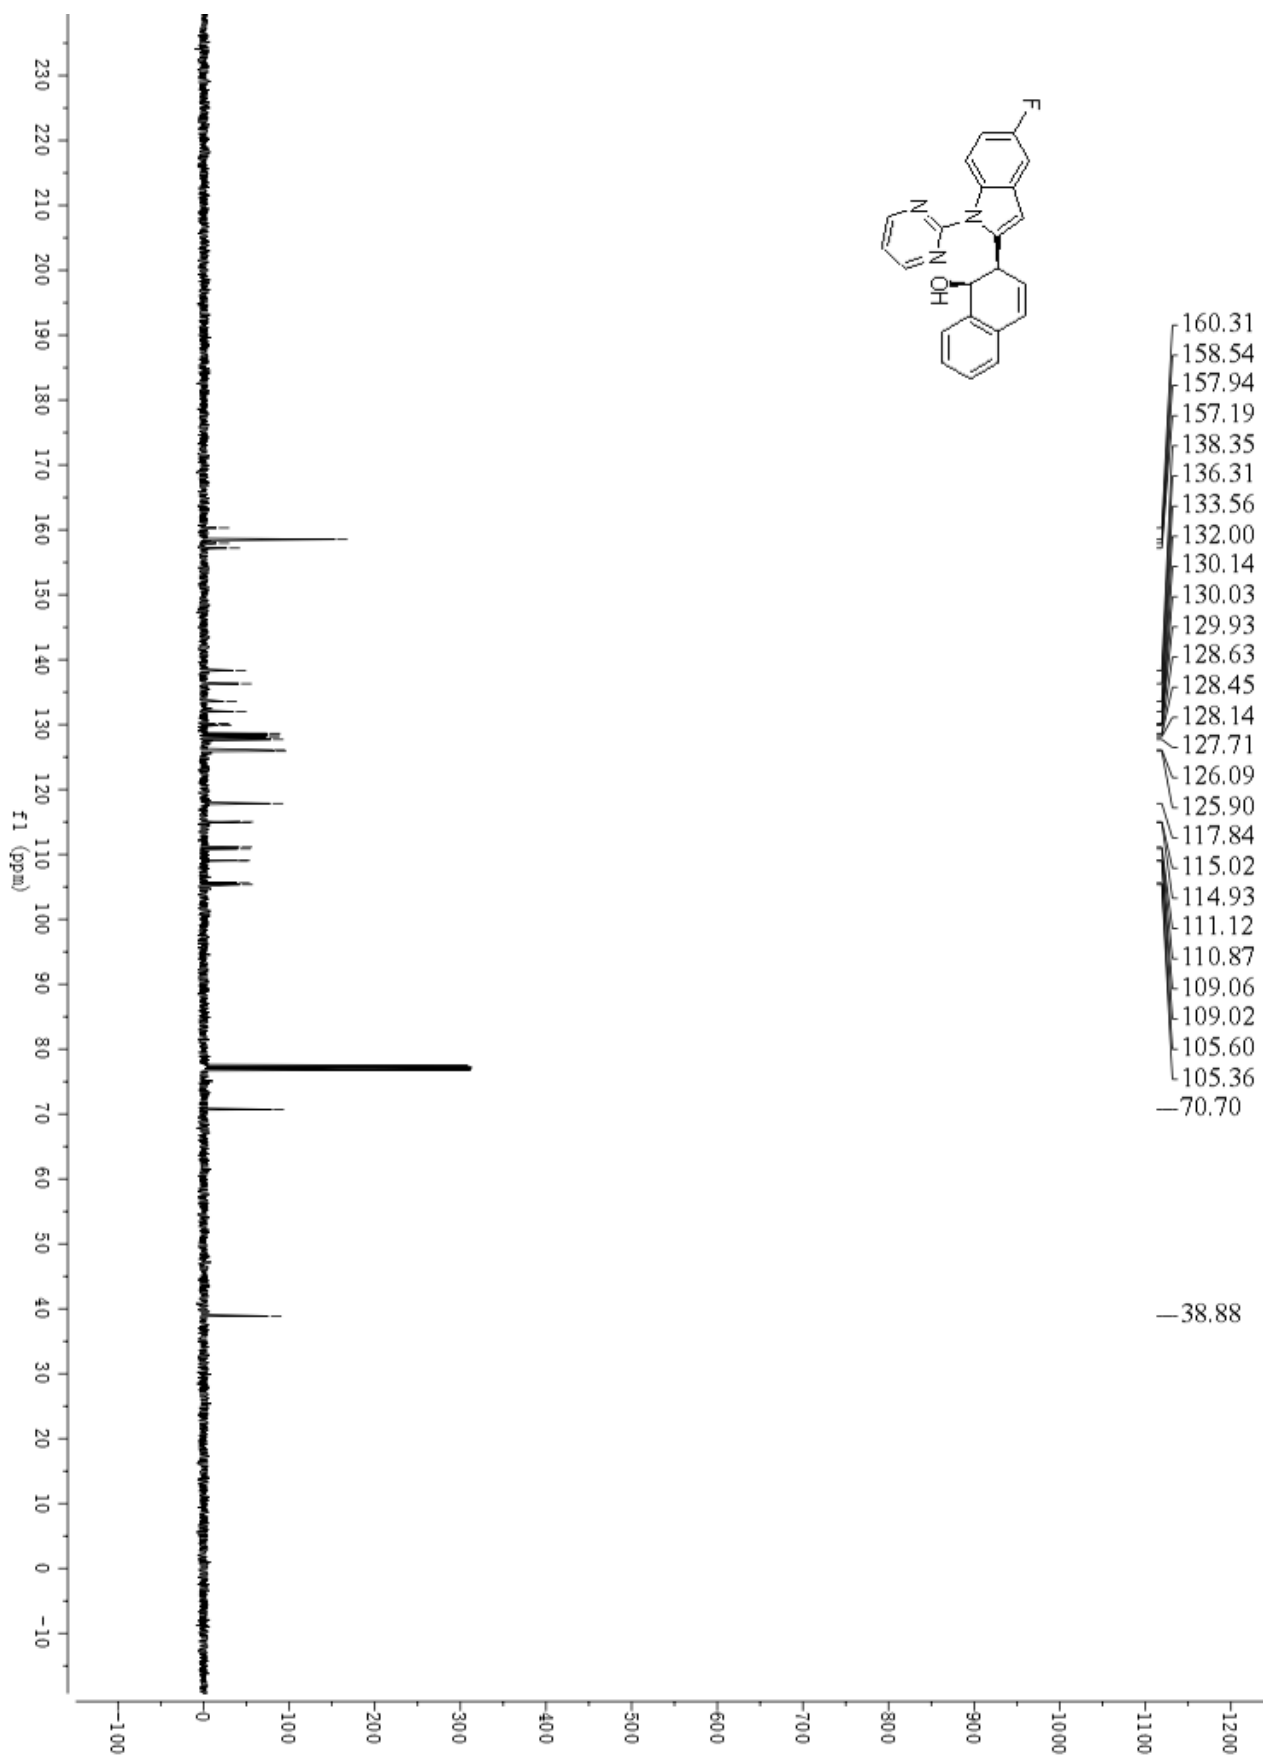

# SUPPLEMENTARY INFORMATION

**Supplementary Fig. 43**  $^{19}\text{F}$  NMR Spectrum of *cis*-3ma

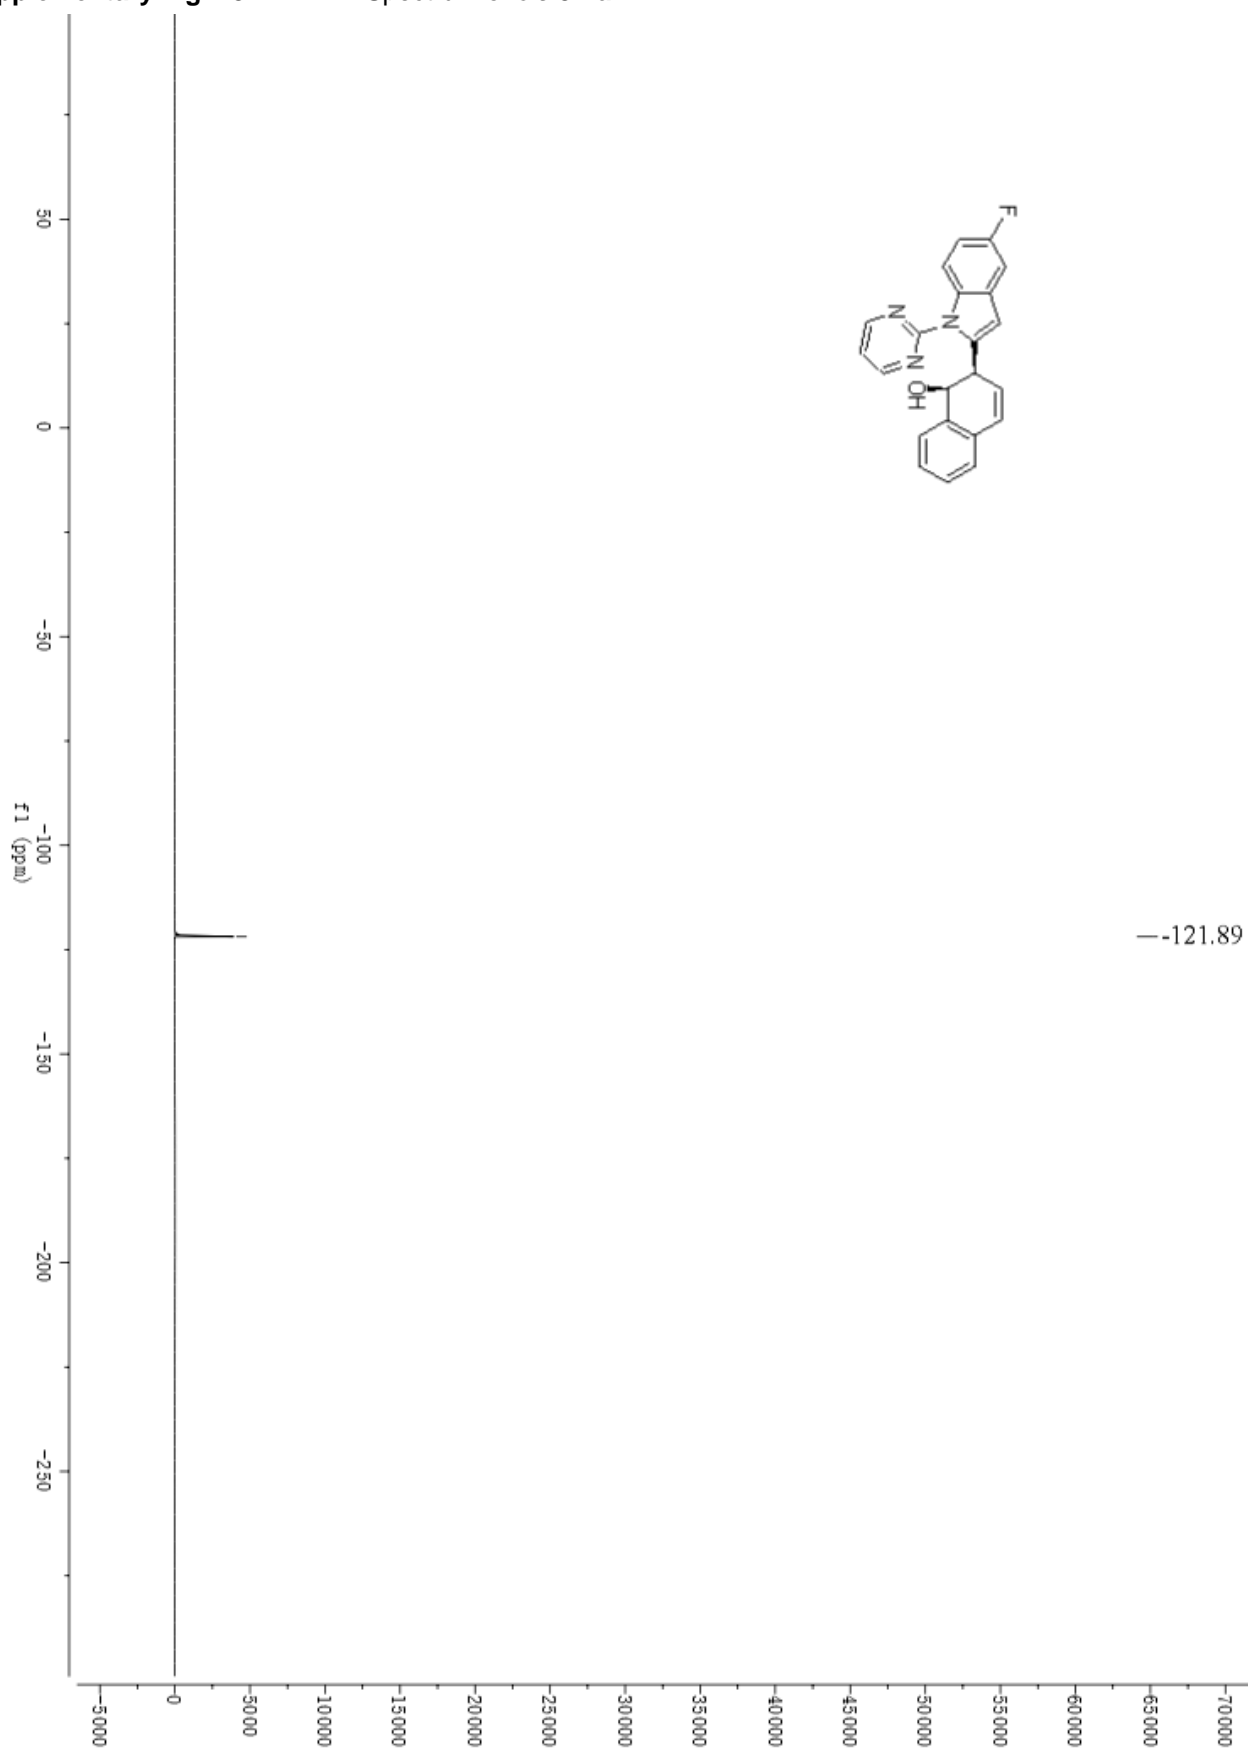

# SUPPLEMENTARY INFORMATION

**Supplementary Fig. 44**  $^1\text{H}$  NMR Spectrum of *cis*-3na

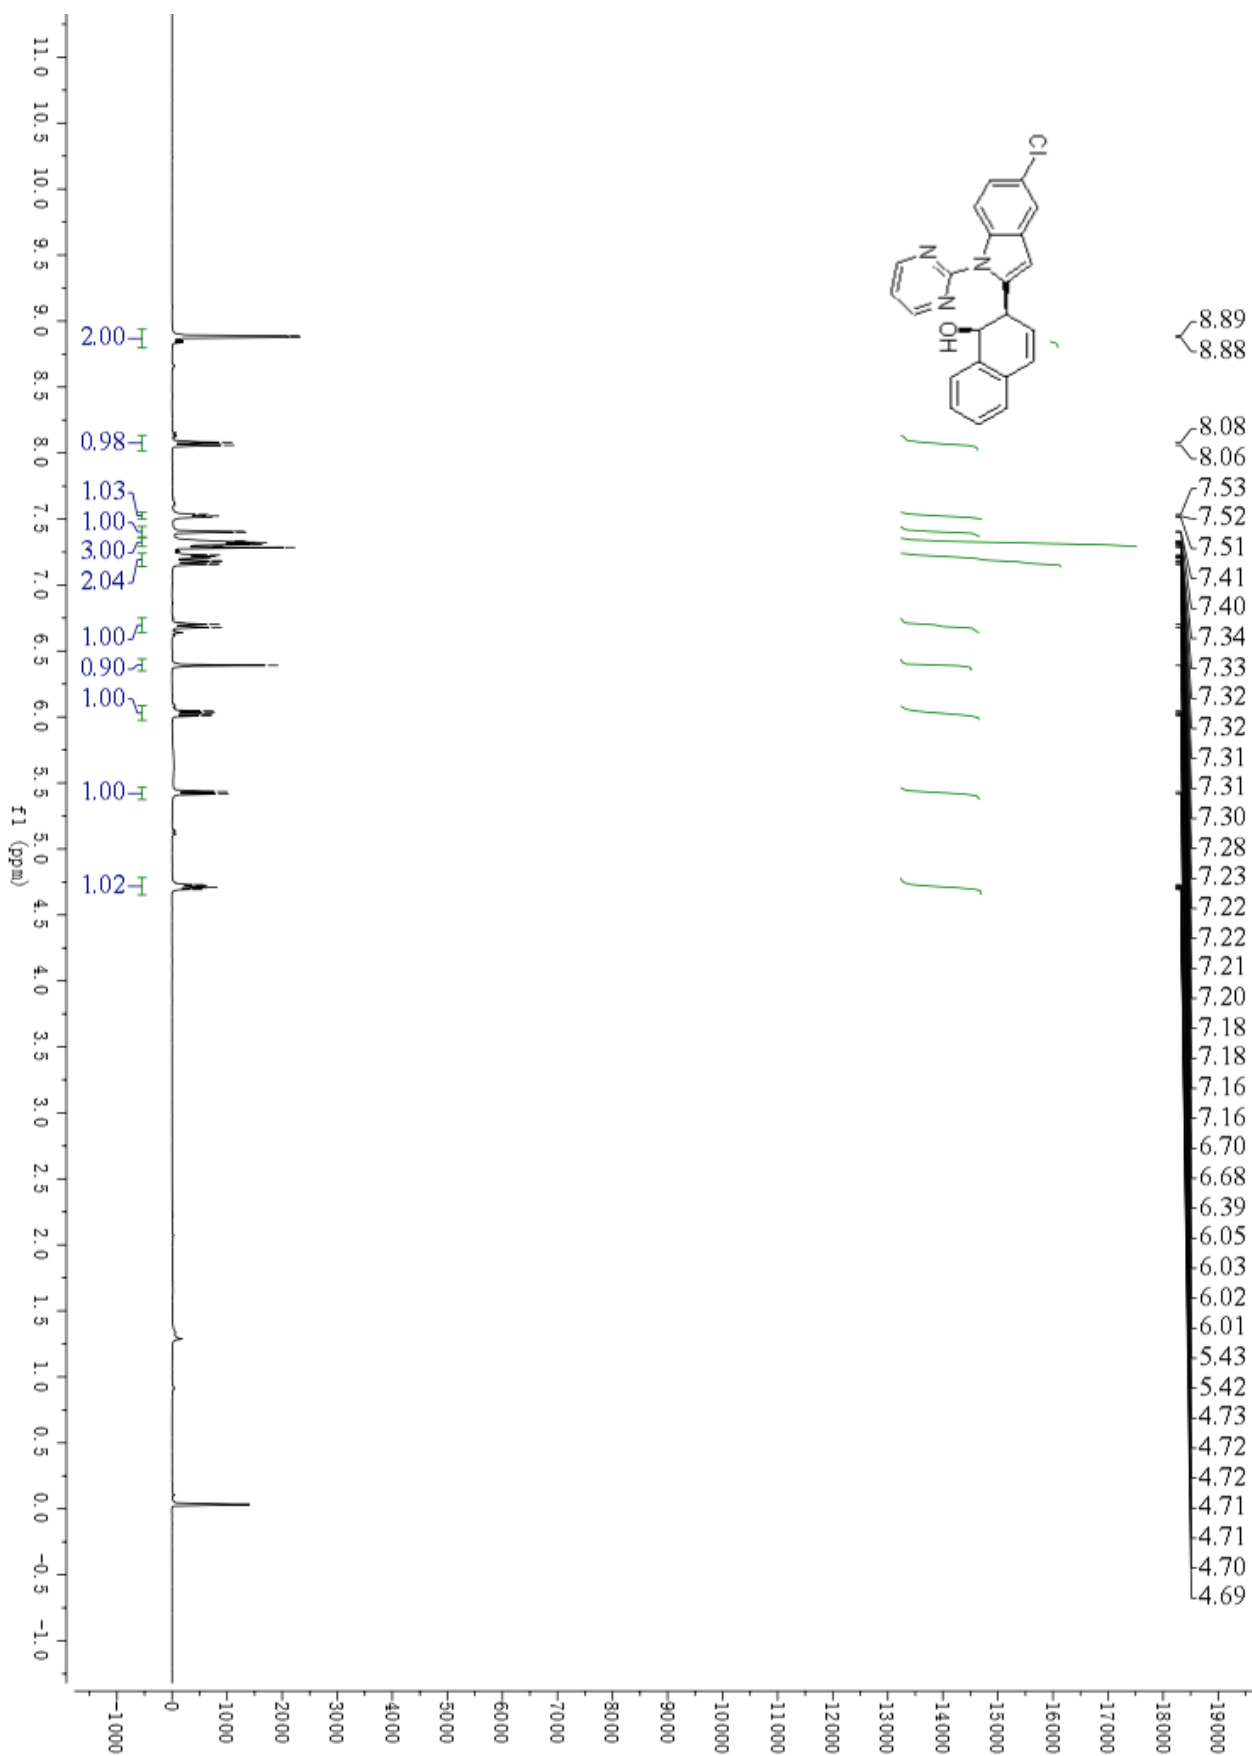

# SUPPLEMENTARY INFORMATION

**Supplementary Fig. 45**  $^{13}\text{C}$  NMR Spectrum of *cis*-3na

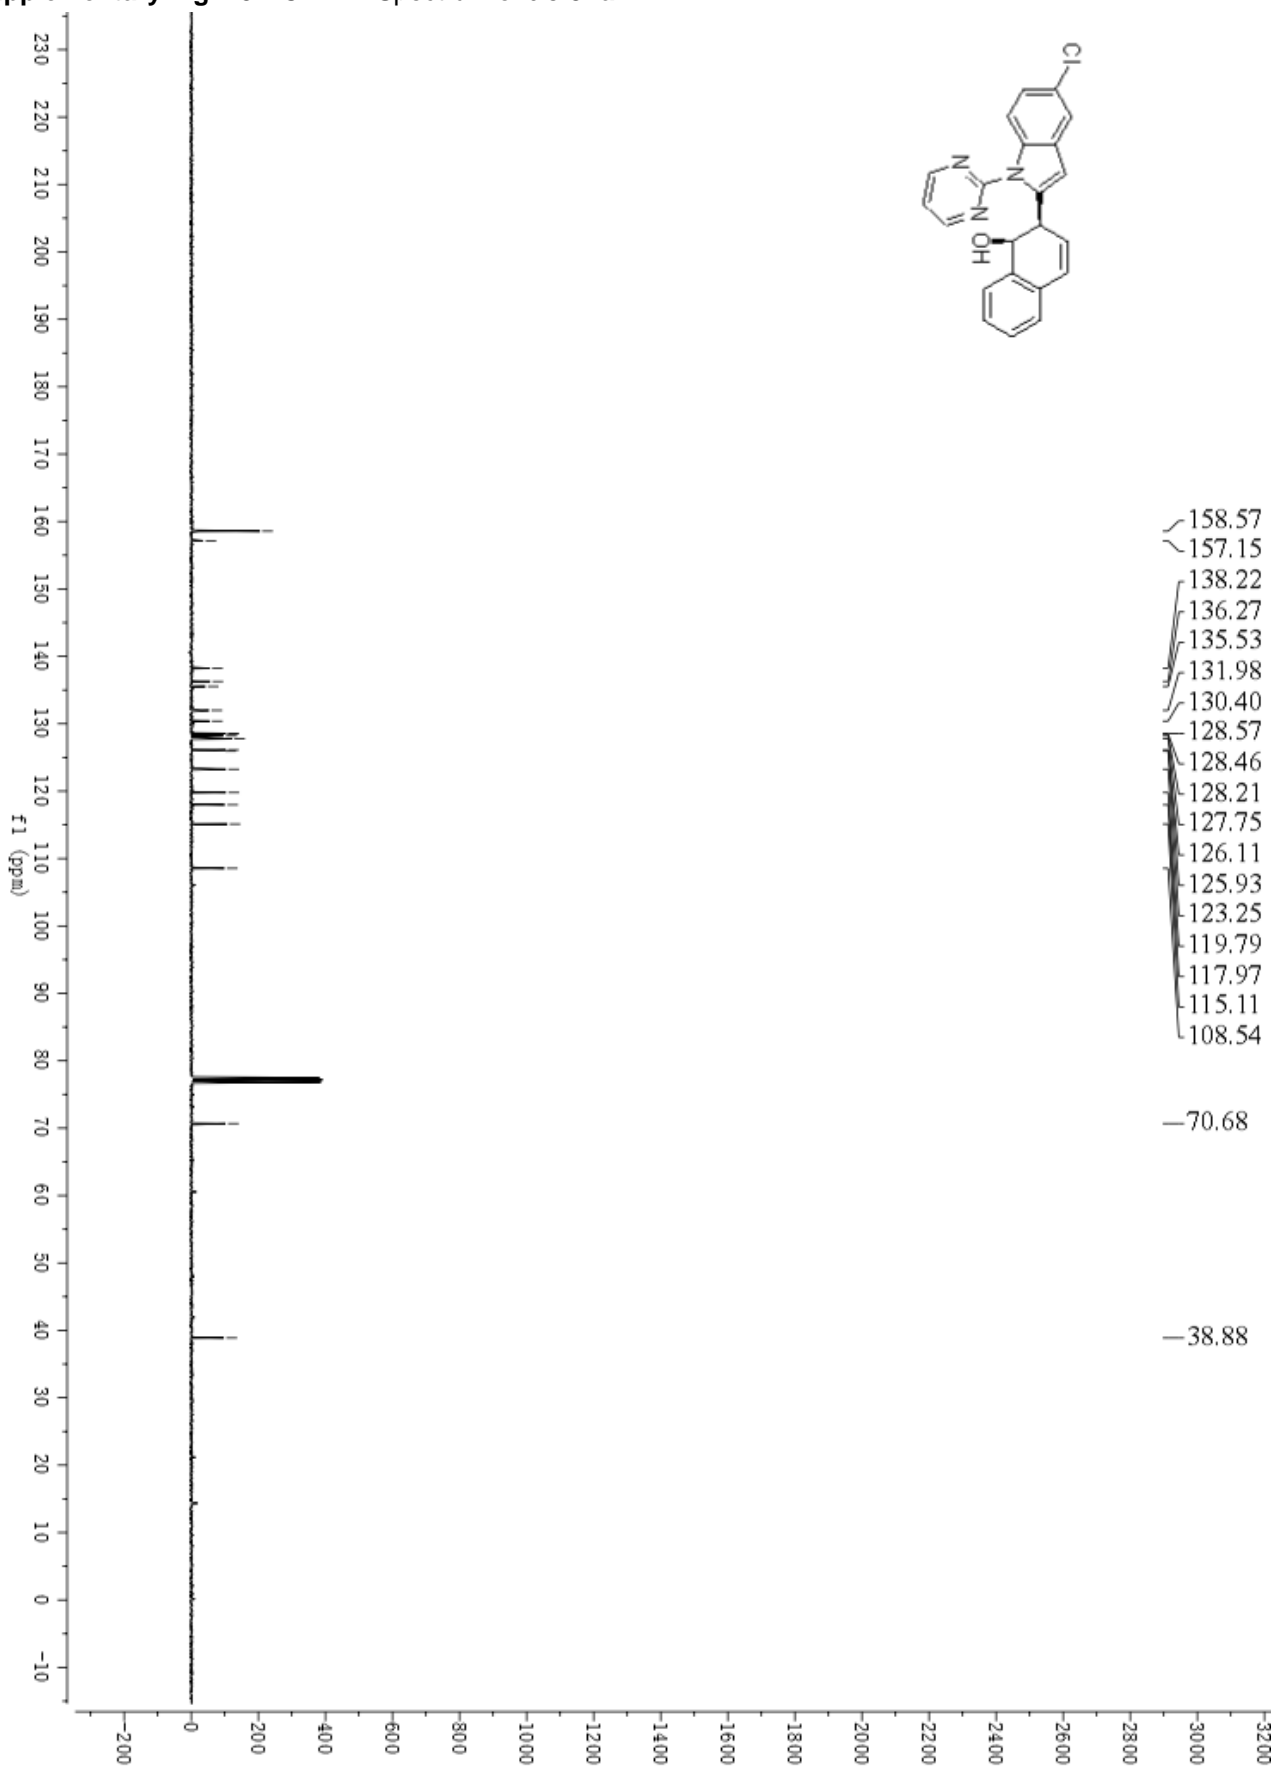



# SUPPLEMENTARY INFORMATION

**Supplementary Fig. 46**  $^1\text{H}$  NMR Spectrum of *cis*-30a

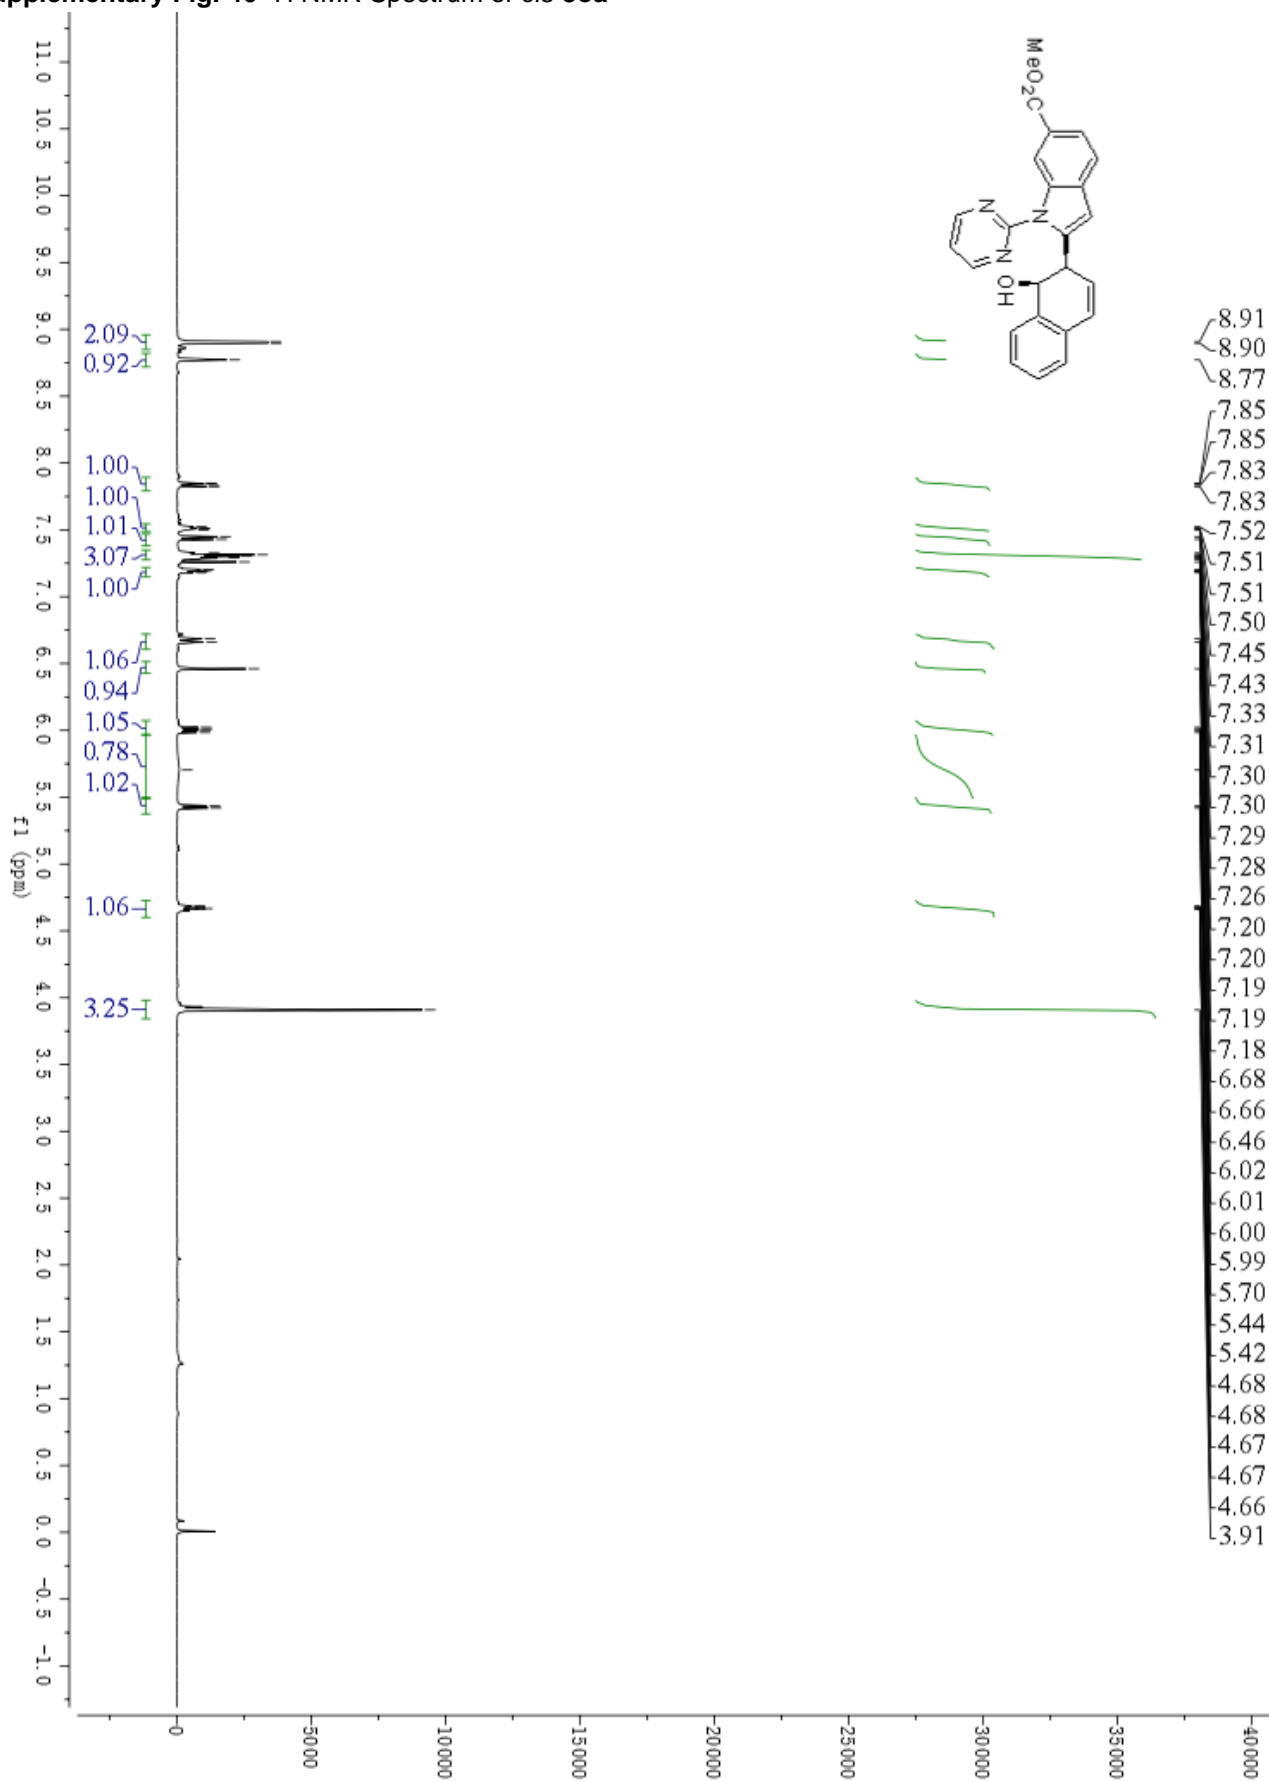

# SUPPLEMENTARY INFORMATION

**Supplementary Fig. 47**  $^{13}\text{C}$  NMR Spectrum of *cis*-3oa

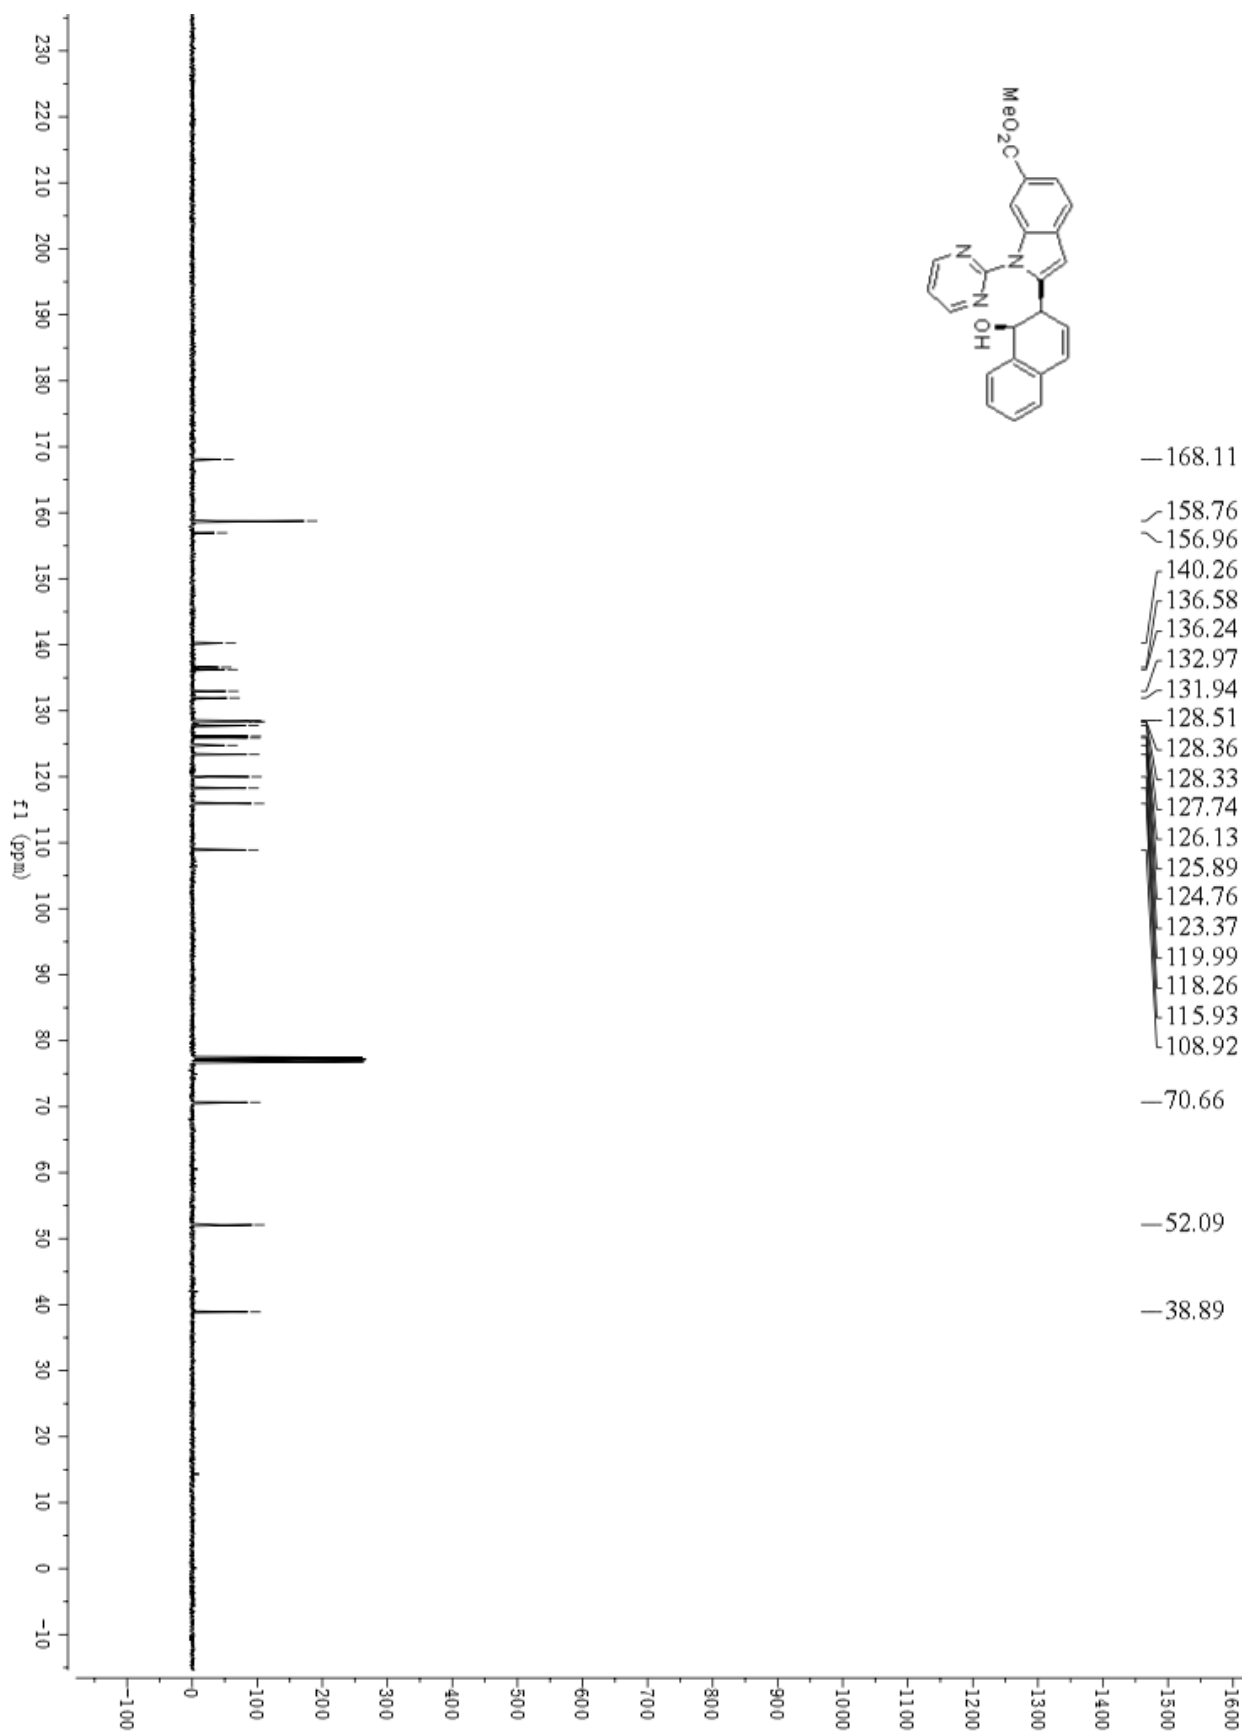

# SUPPLEMENTARY INFORMATION

**Supplementary Fig. 48**  $^1\text{H}$  NMR Spectrum of *cis*-3pa

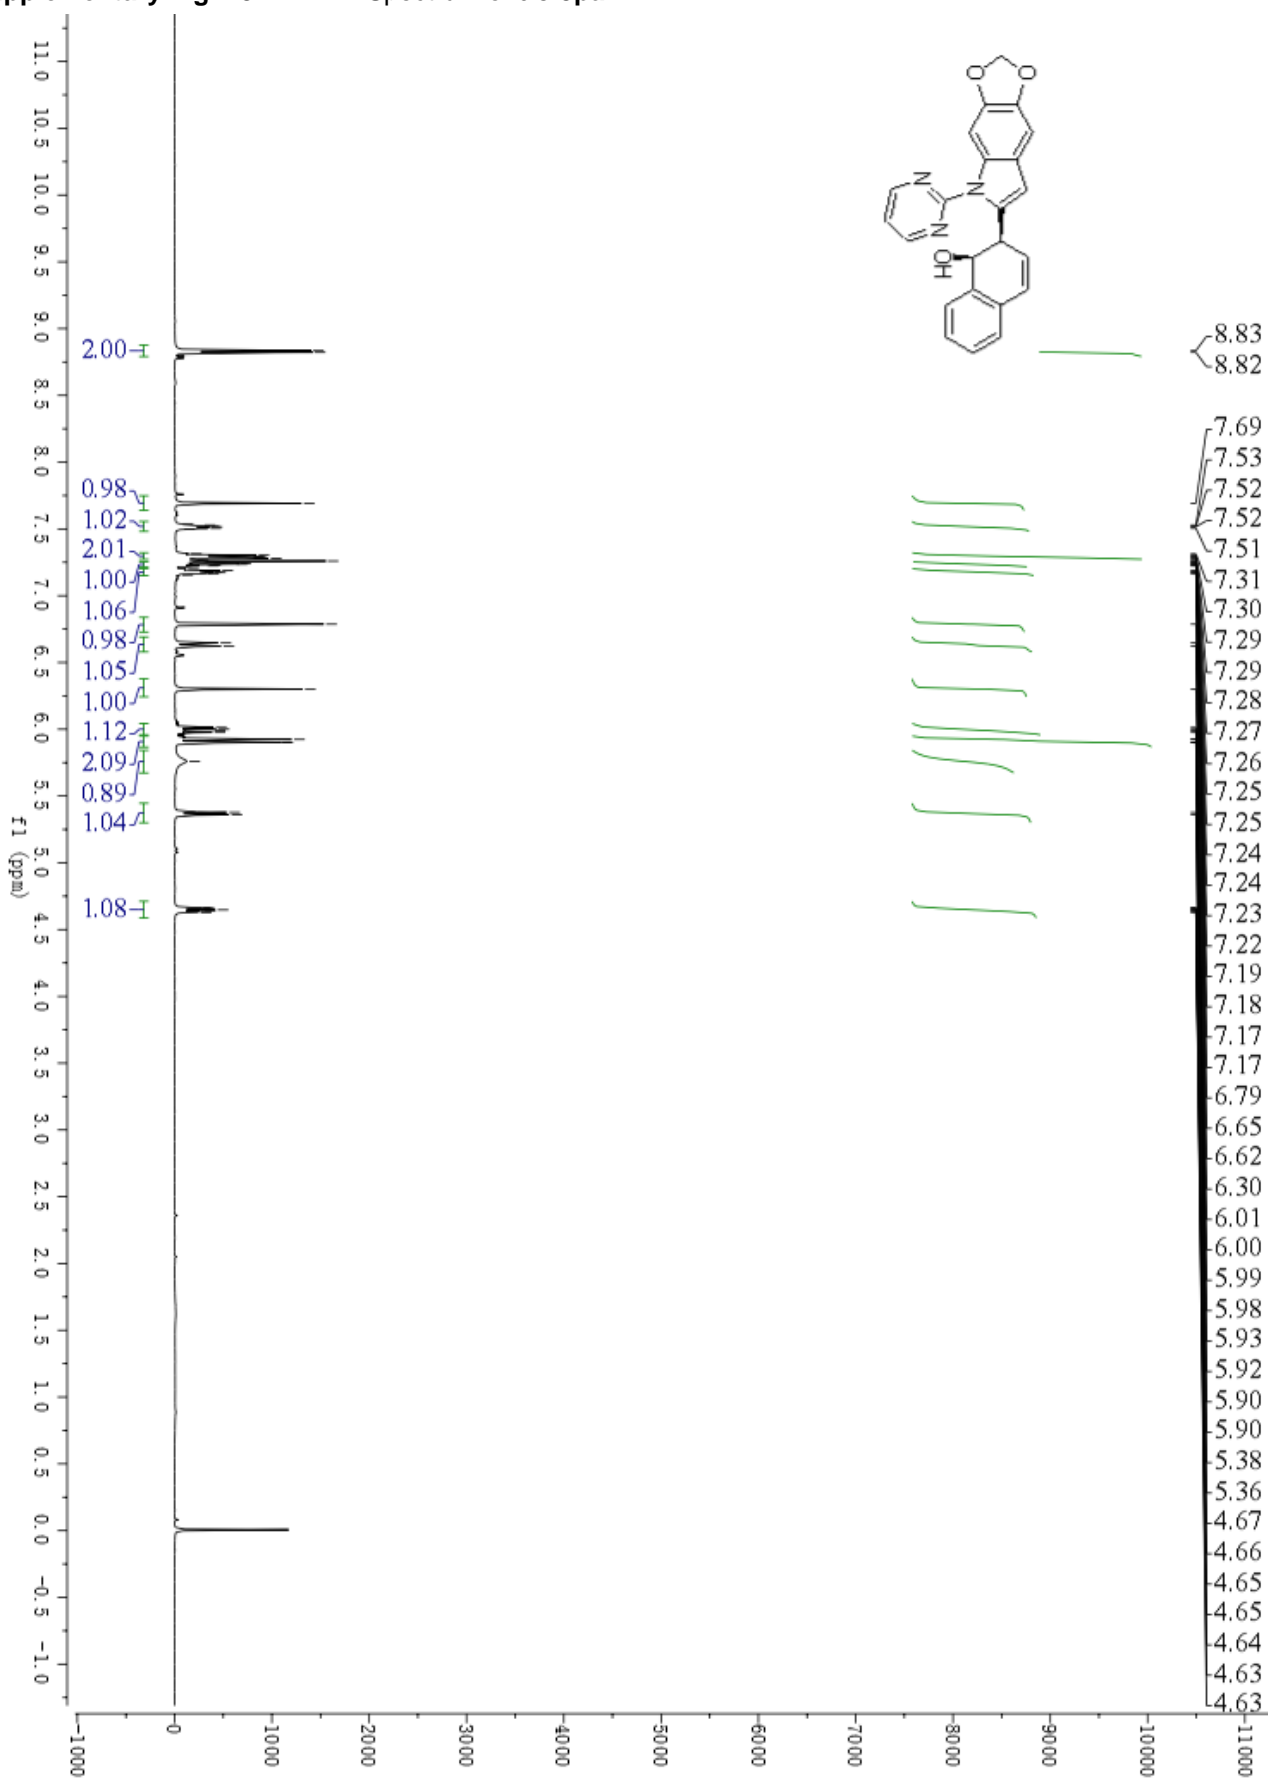

# SUPPLEMENTARY INFORMATION

**Supplementary Fig. 49**  $^{13}\text{C}$  NMR Spectrum of *cis*-3pa

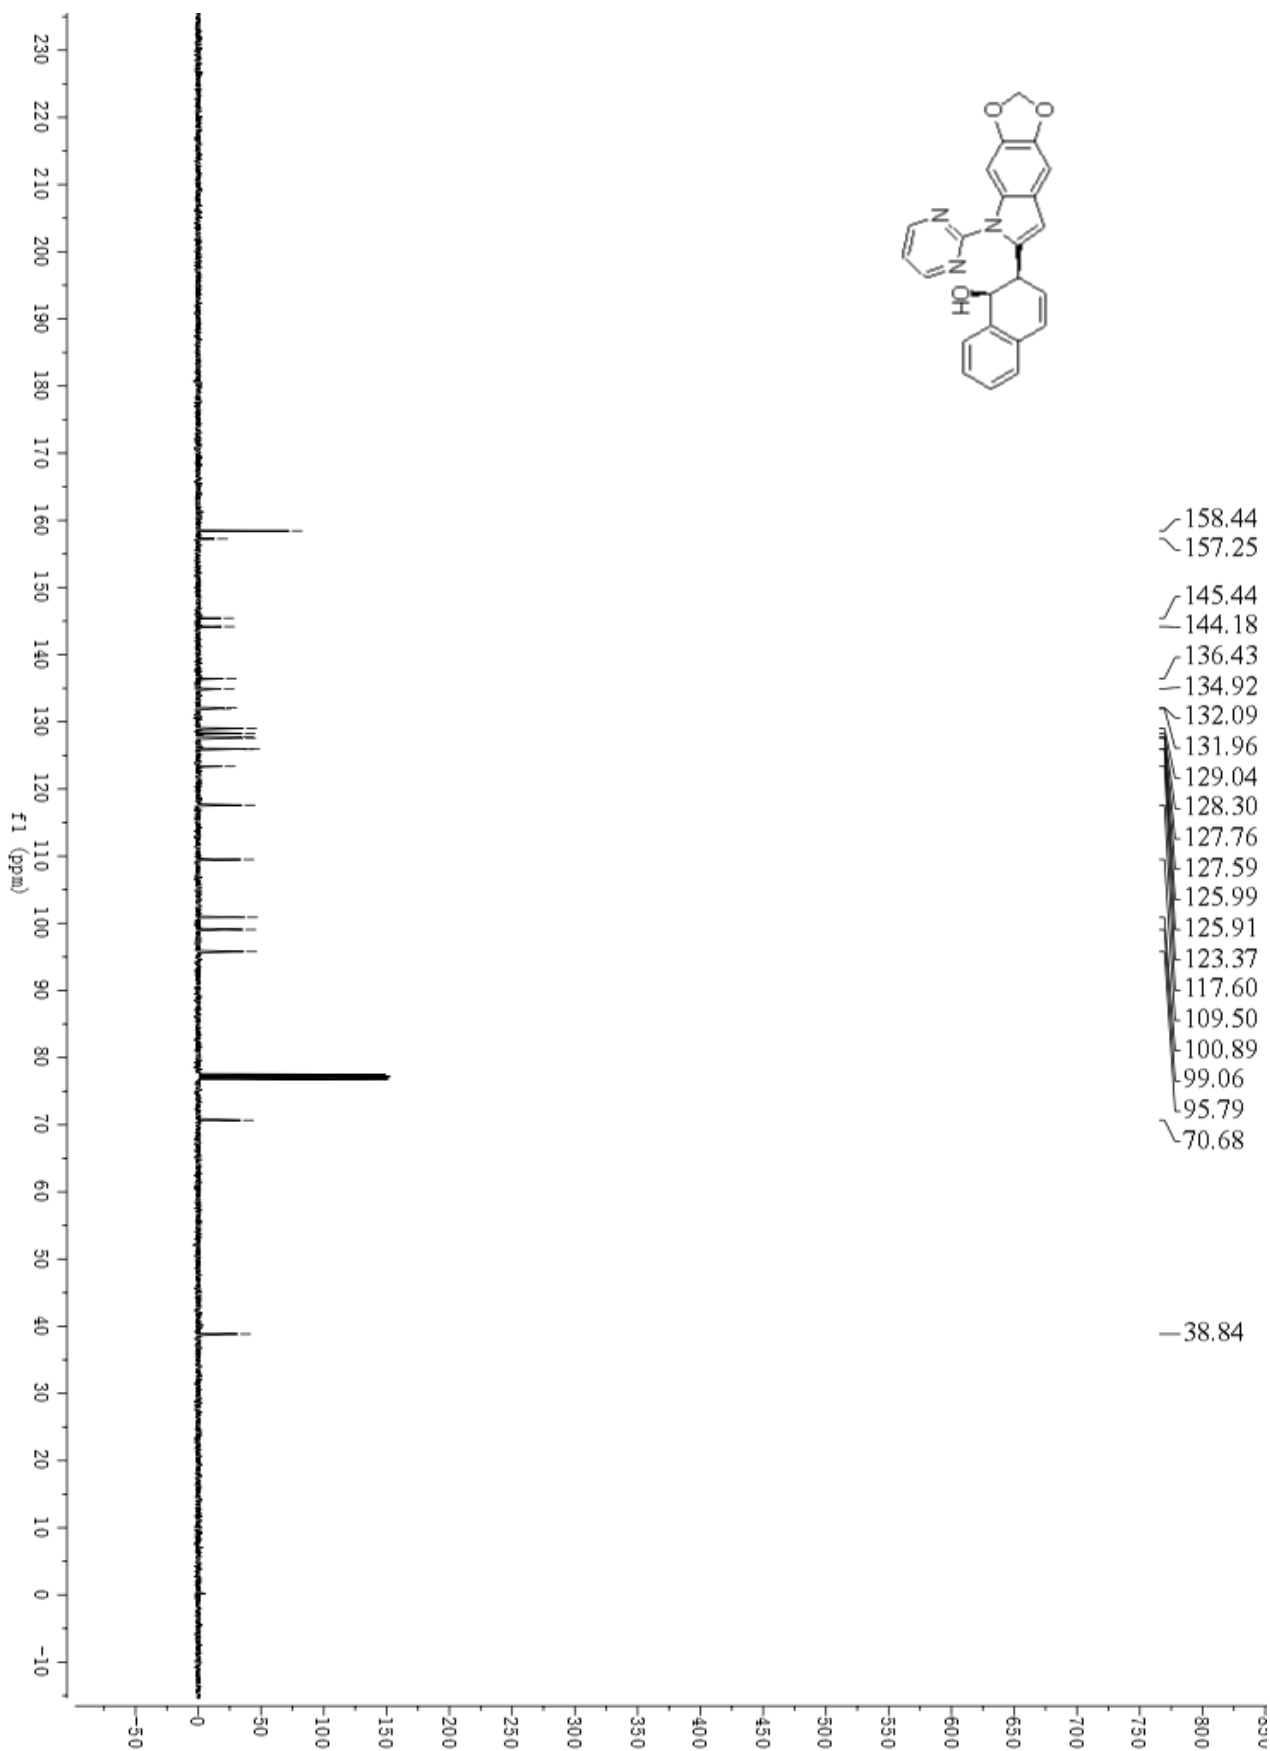

# SUPPLEMENTARY INFORMATION

**Supplementary Fig. 50**  $^1\text{H}$  NMR Spectrum of *cis*-3qa

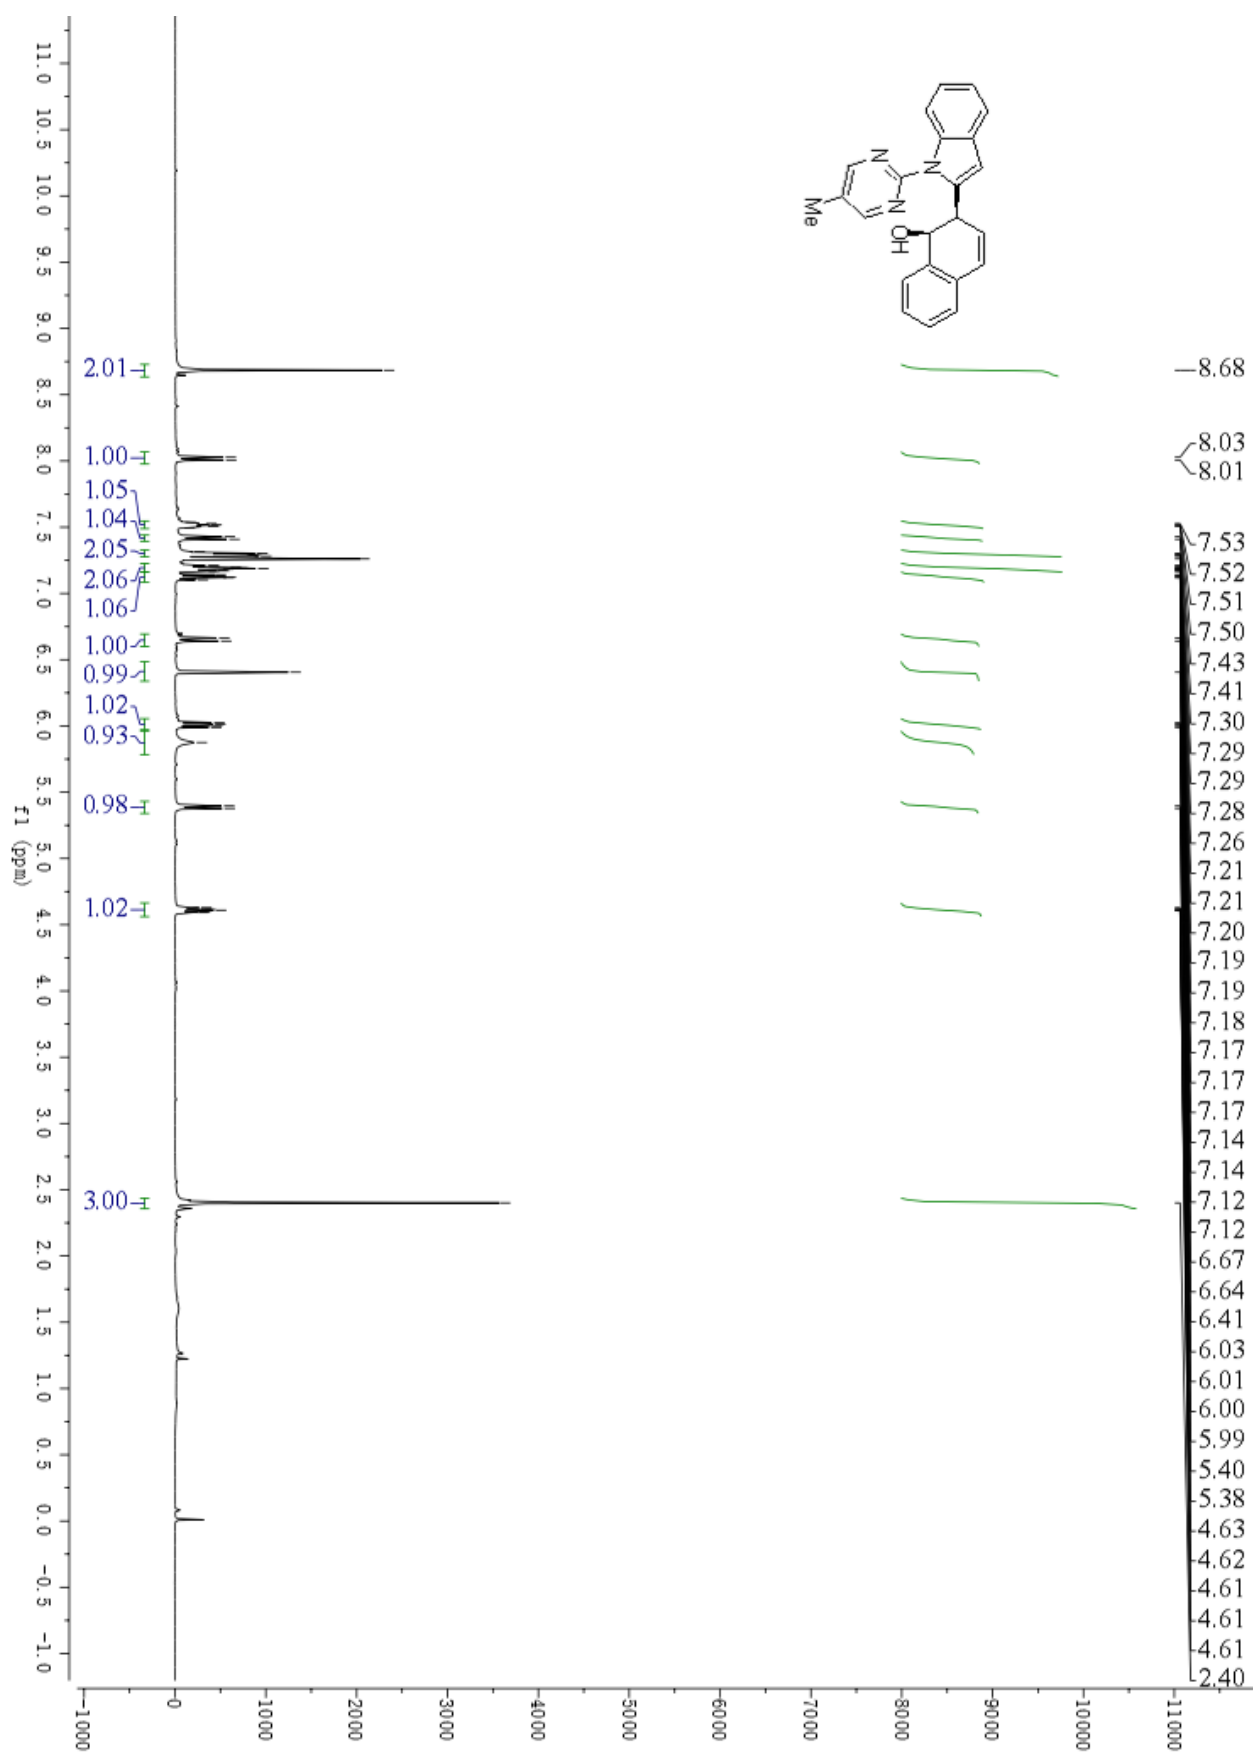

# SUPPLEMENTARY INFORMATION

**Supplementary Fig. 51**  $^{13}\text{C}$  NMR Spectrum of *cis*-3qa

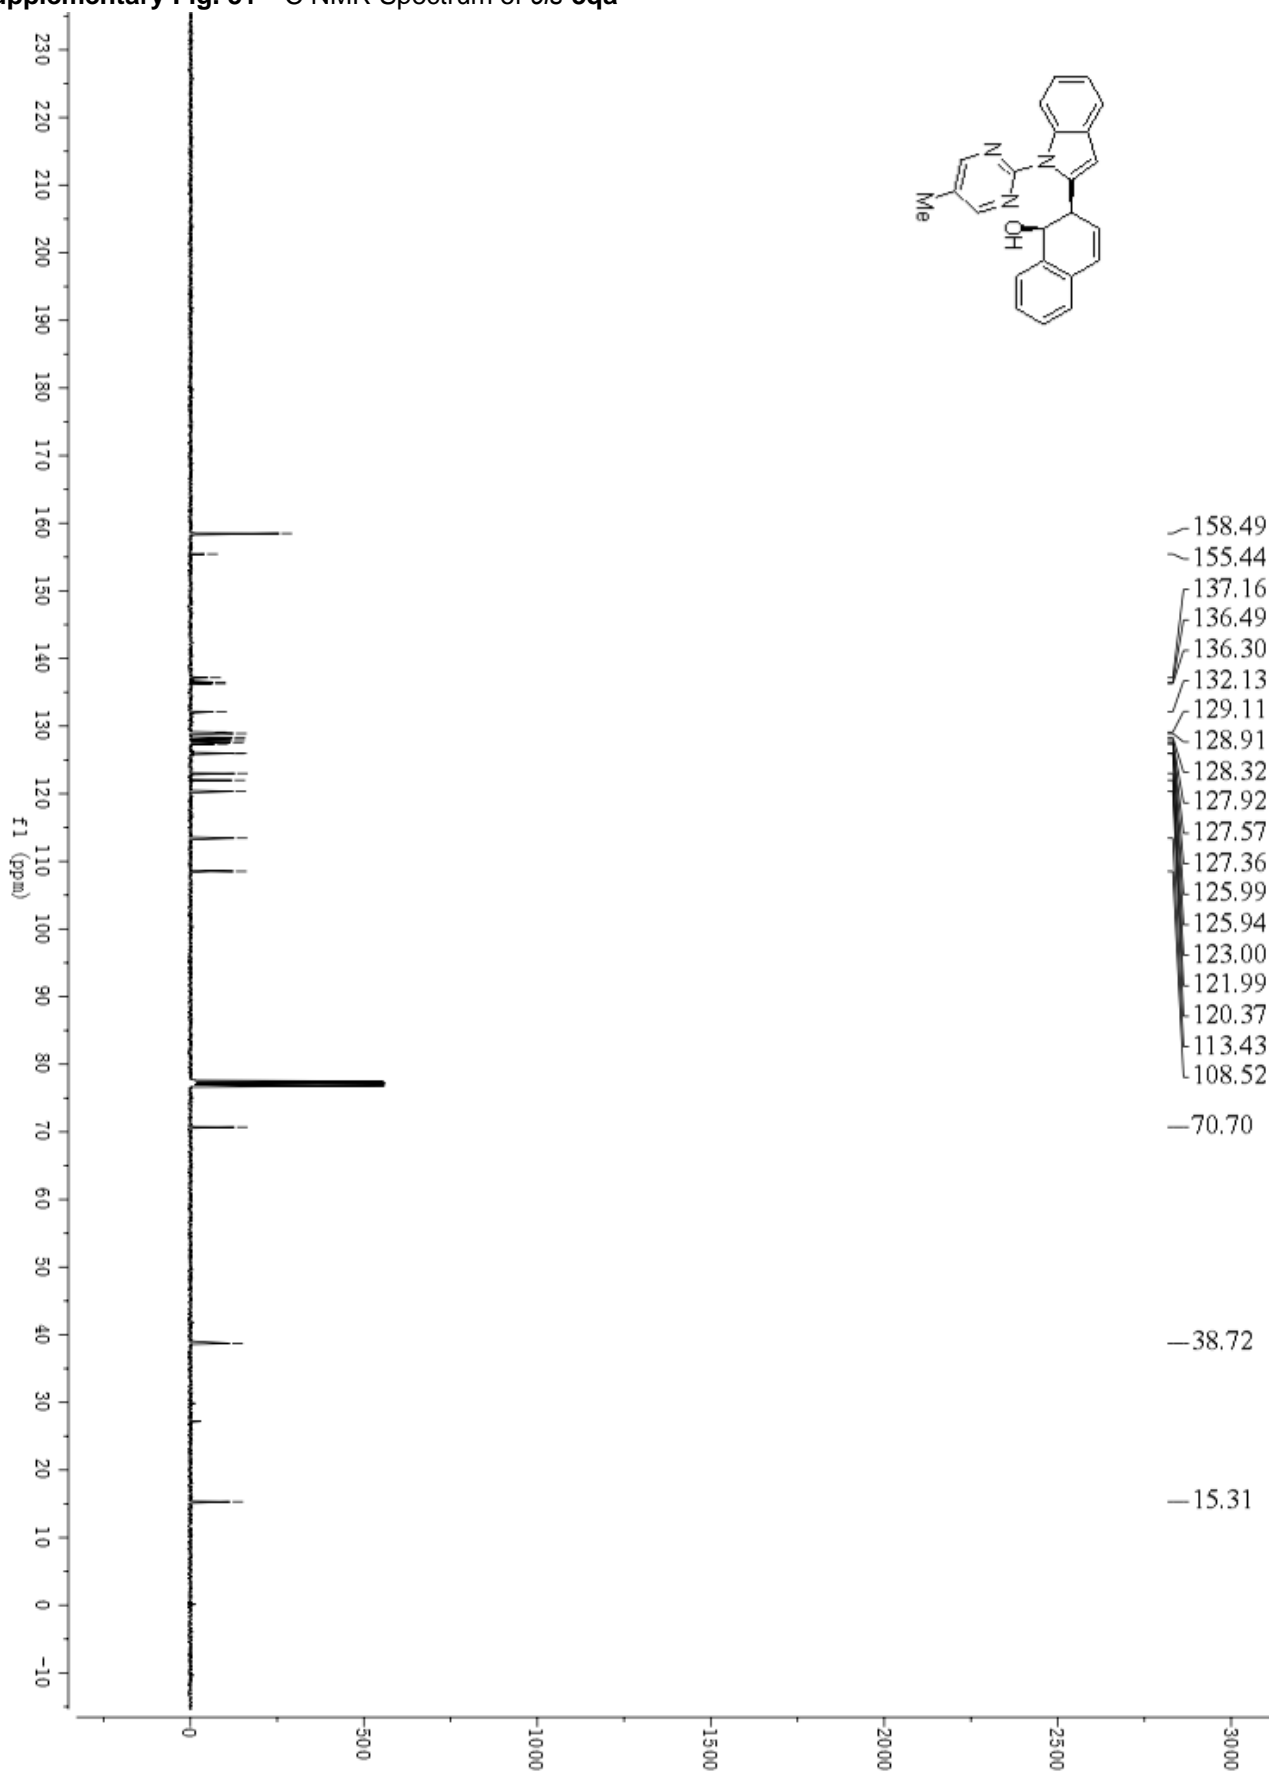

# SUPPLEMENTARY INFORMATION

**Supplementary Fig. 52**  $^1\text{H}$  NMR Spectrum of *cis*-3ra

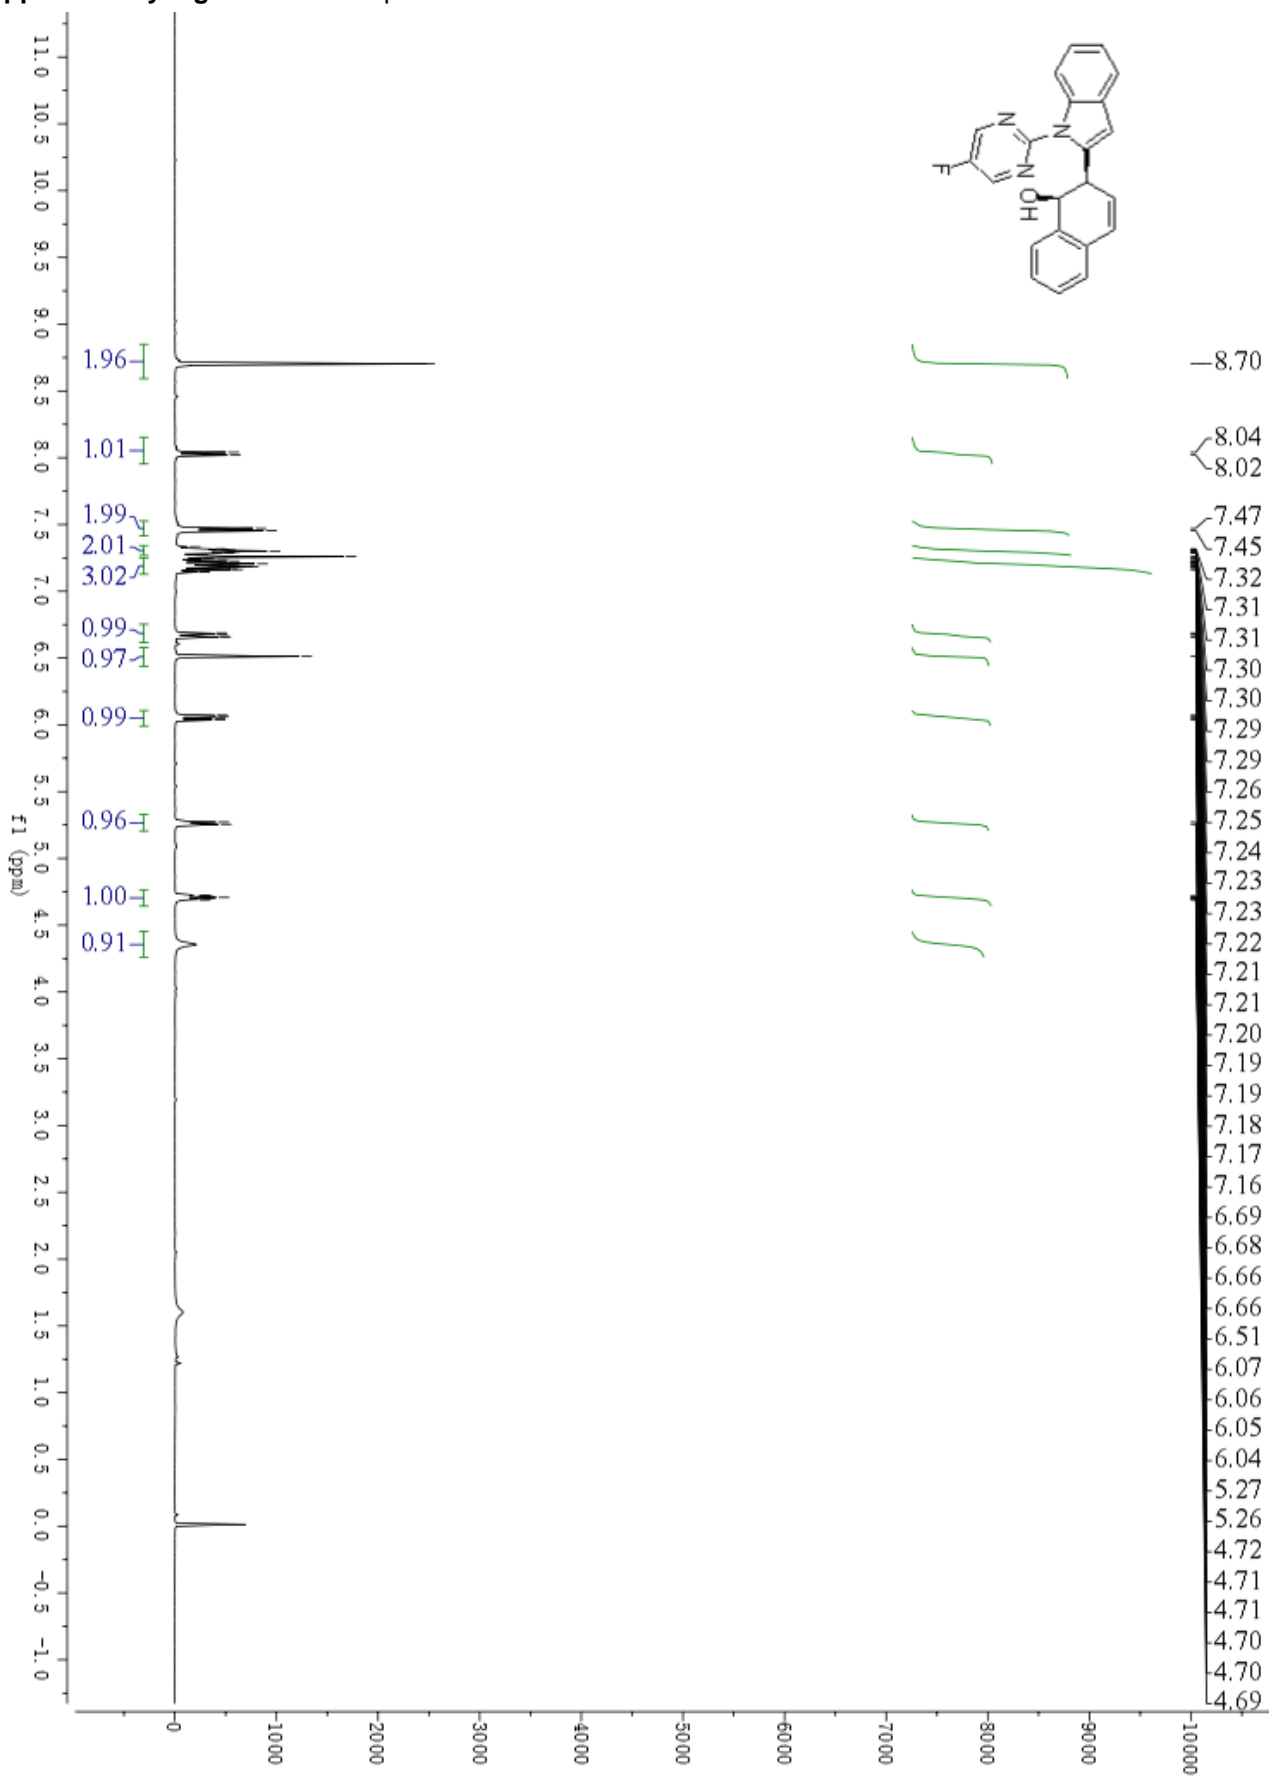

# SUPPLEMENTARY INFORMATION

**Supplementary Fig. 53**  $^{13}\text{C}$  NMR Spectrum of *cis*-3ra

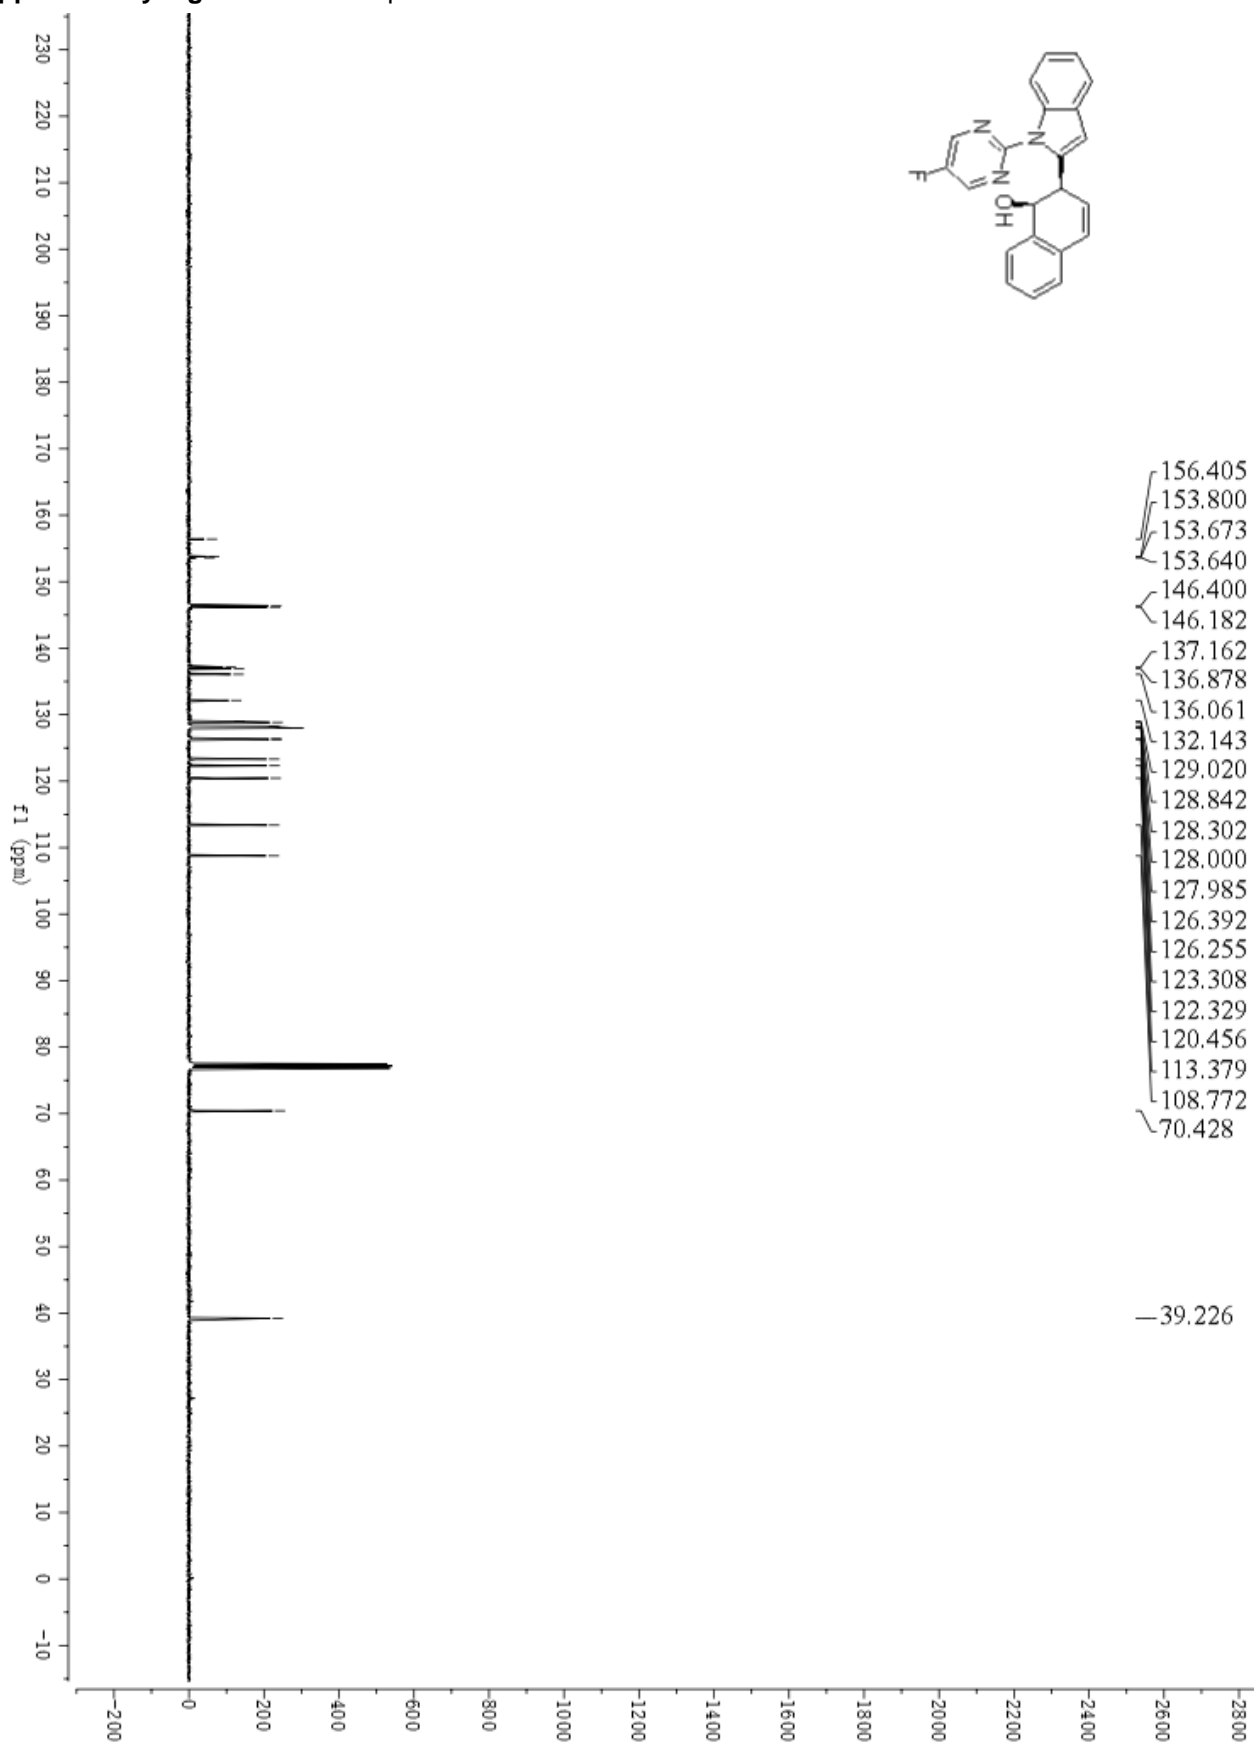



# SUPPLEMENTARY INFORMATION

**Supplementary Fig. 54**  $^{19}\text{F}$  NMR Spectrum of *cis*-3ra

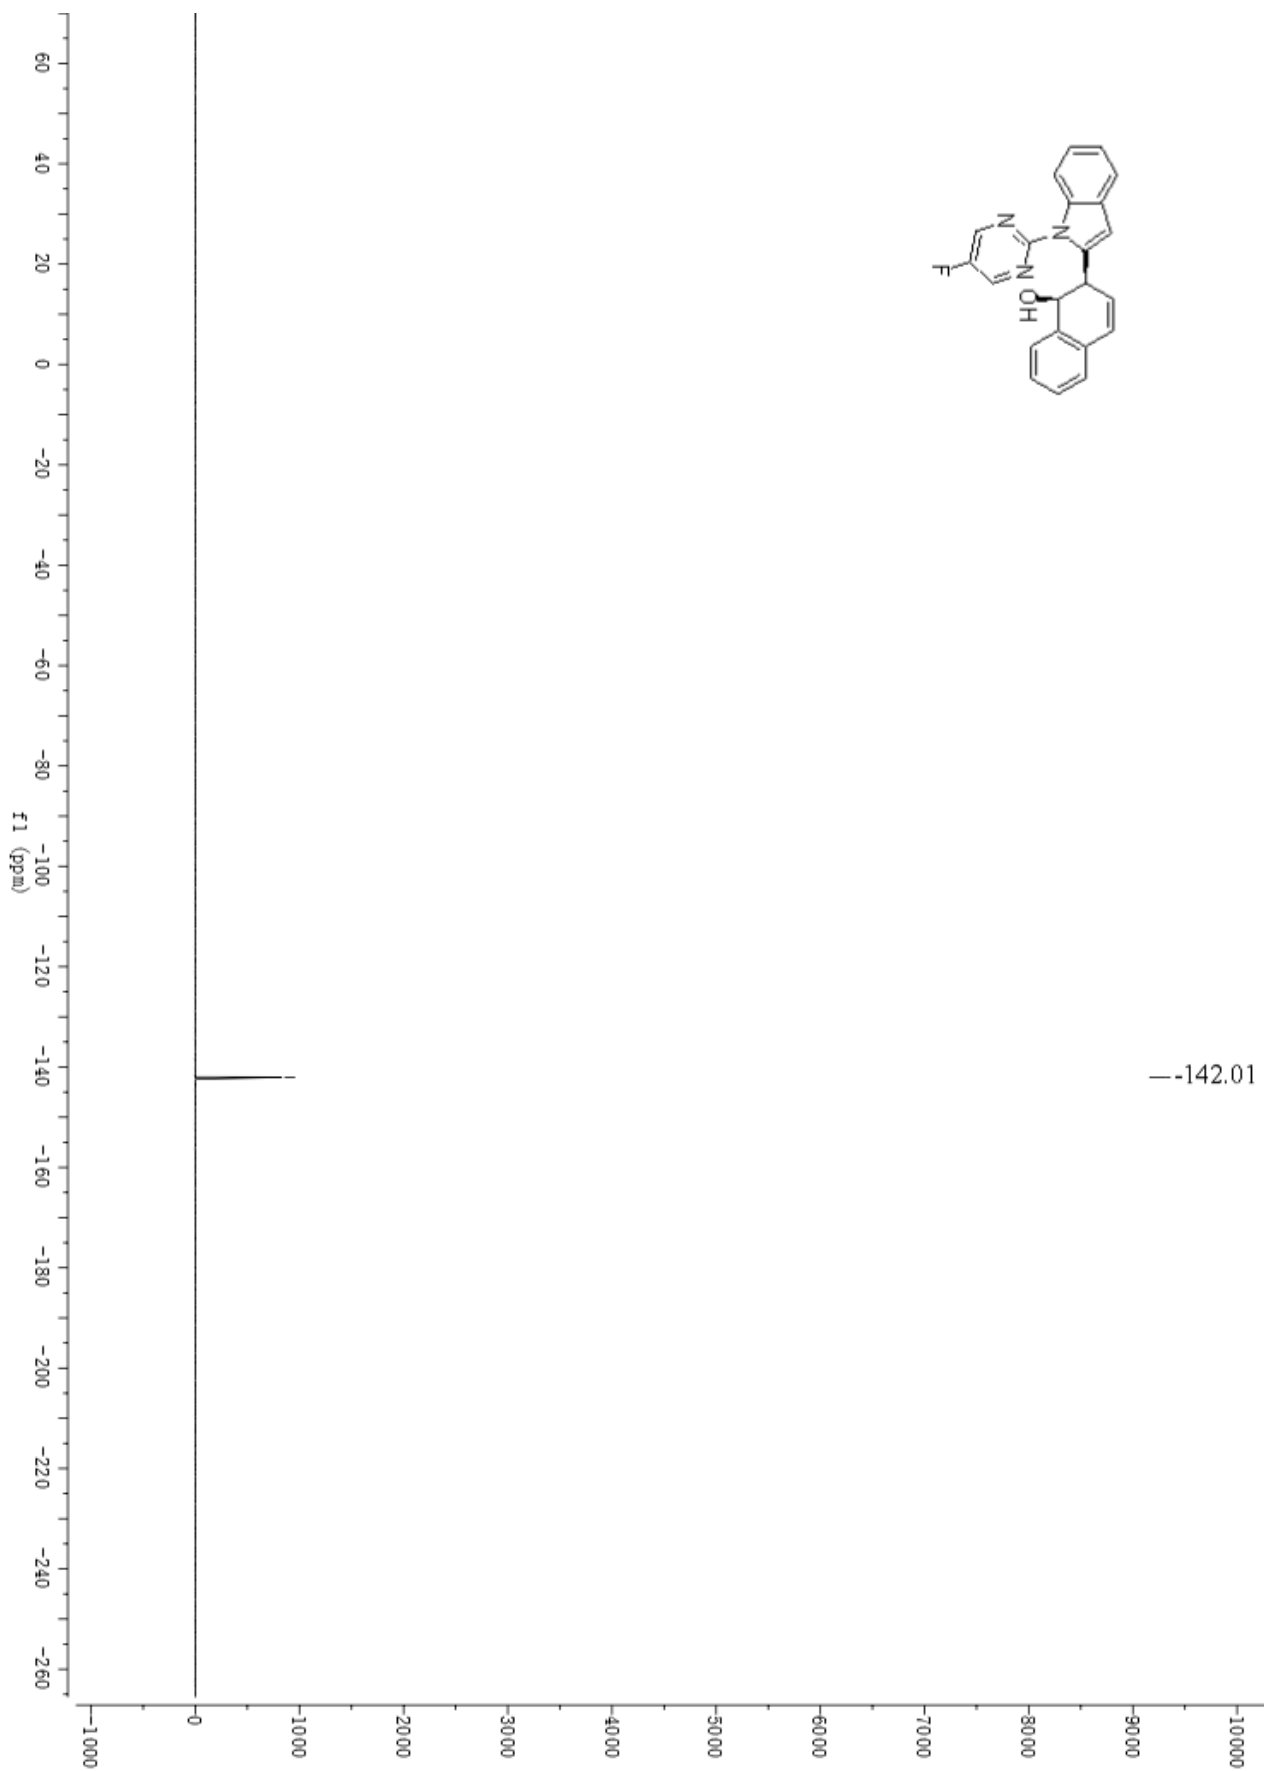

# SUPPLEMENTARY INFORMATION

**Supplementary Fig. 55**  $^1\text{H}$  NMR Spectrum of *cis*-3sa

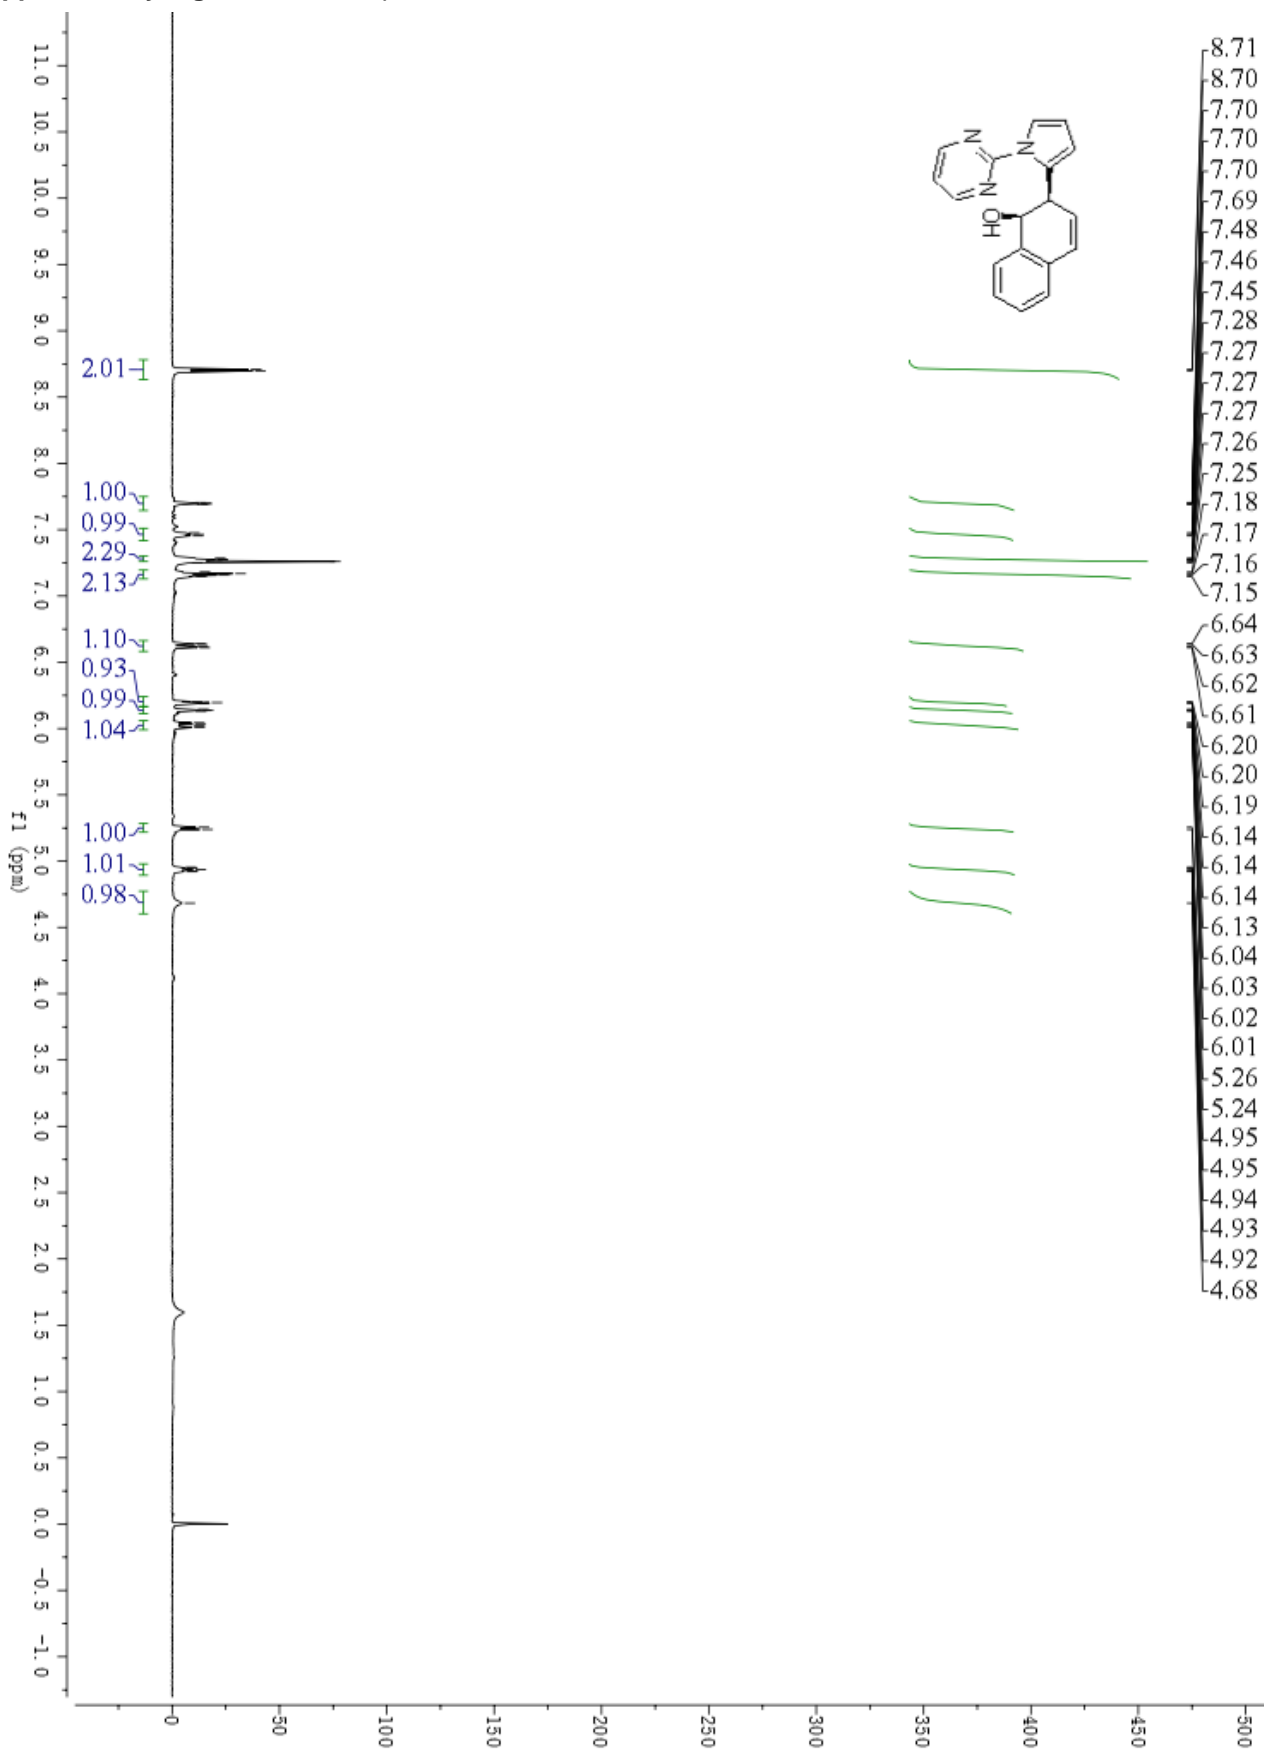

# SUPPLEMENTARY INFORMATION

Supplementary Fig. 56 <sup>13</sup>C NMR Spectrum of *cis*-3sa

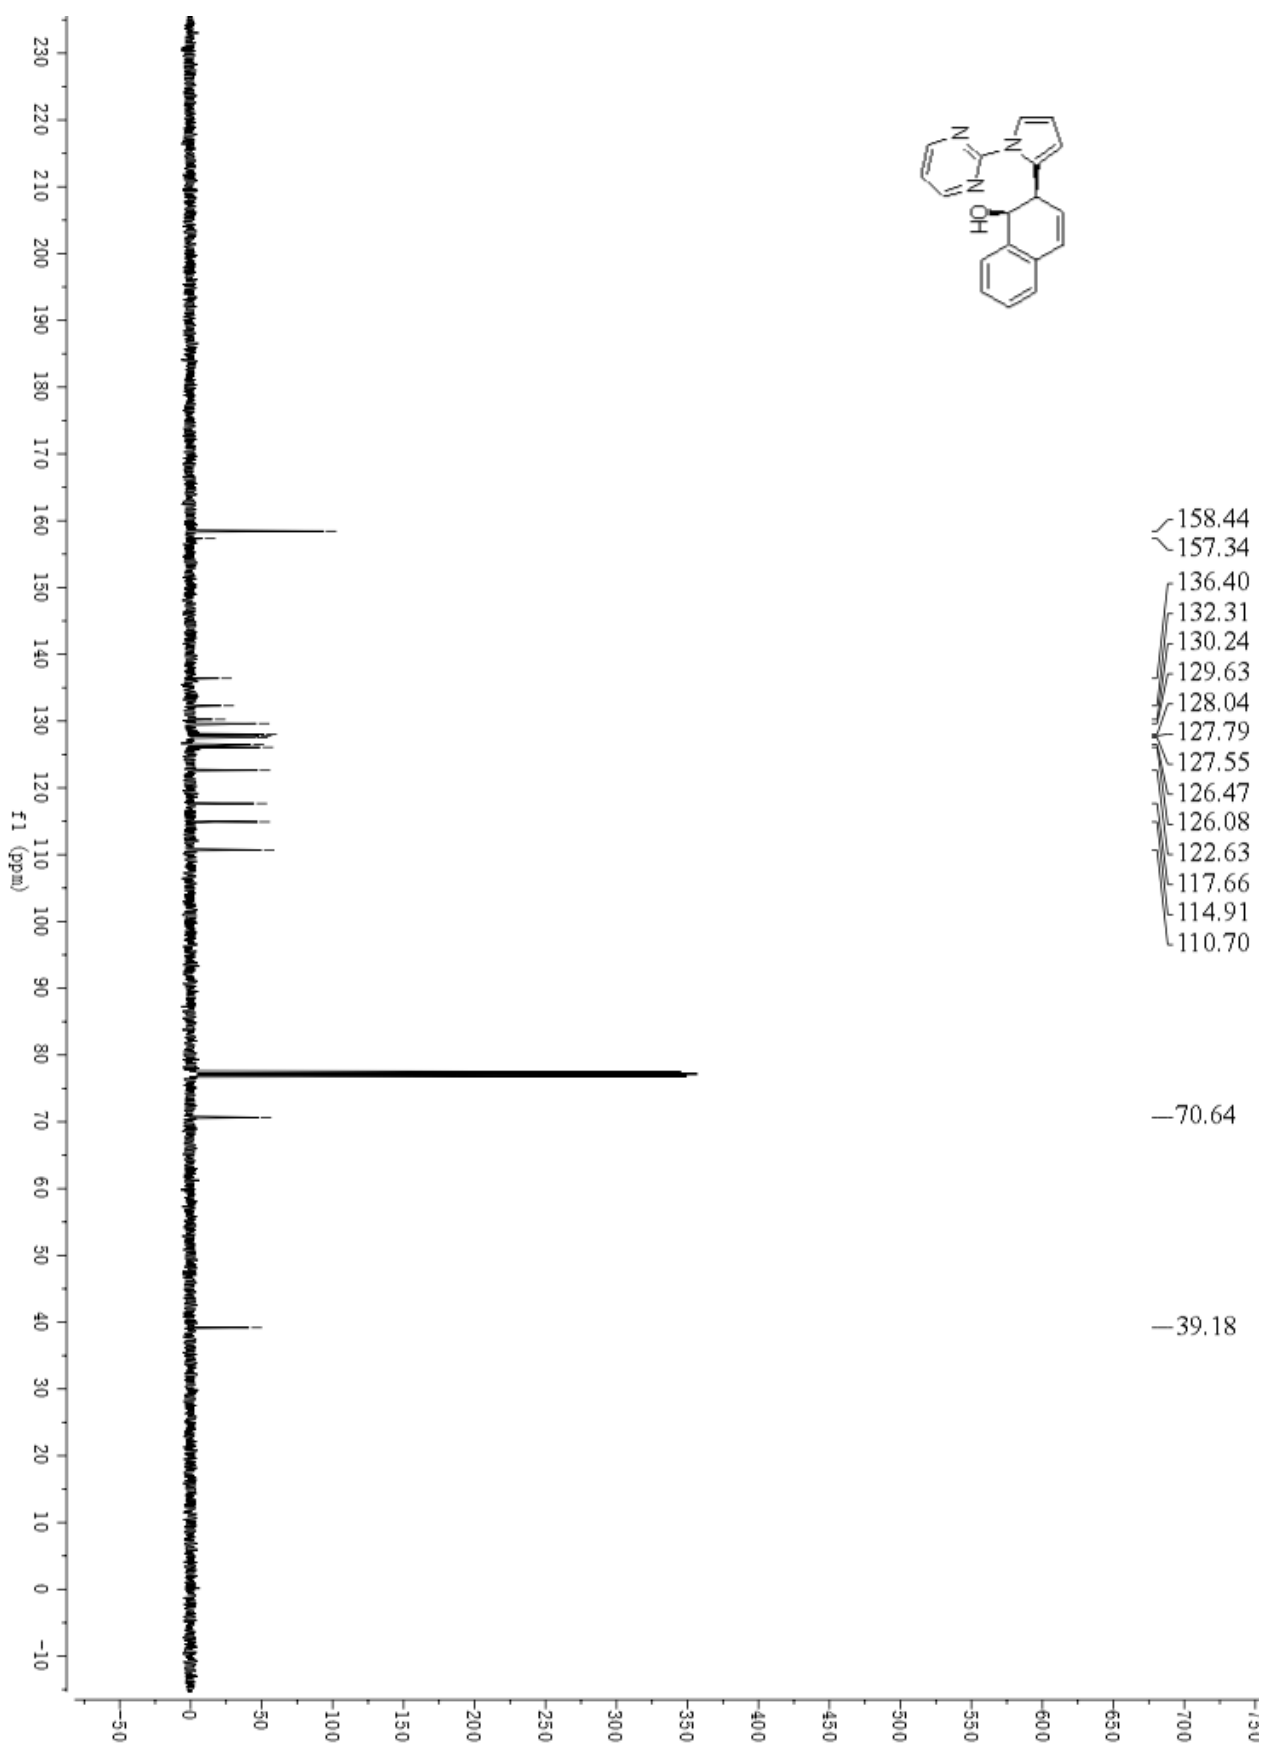

# SUPPLEMENTARY INFORMATION

**Supplementary Fig. S7**  $^1\text{H}$  NMR Spectrum of *cis*-3ta

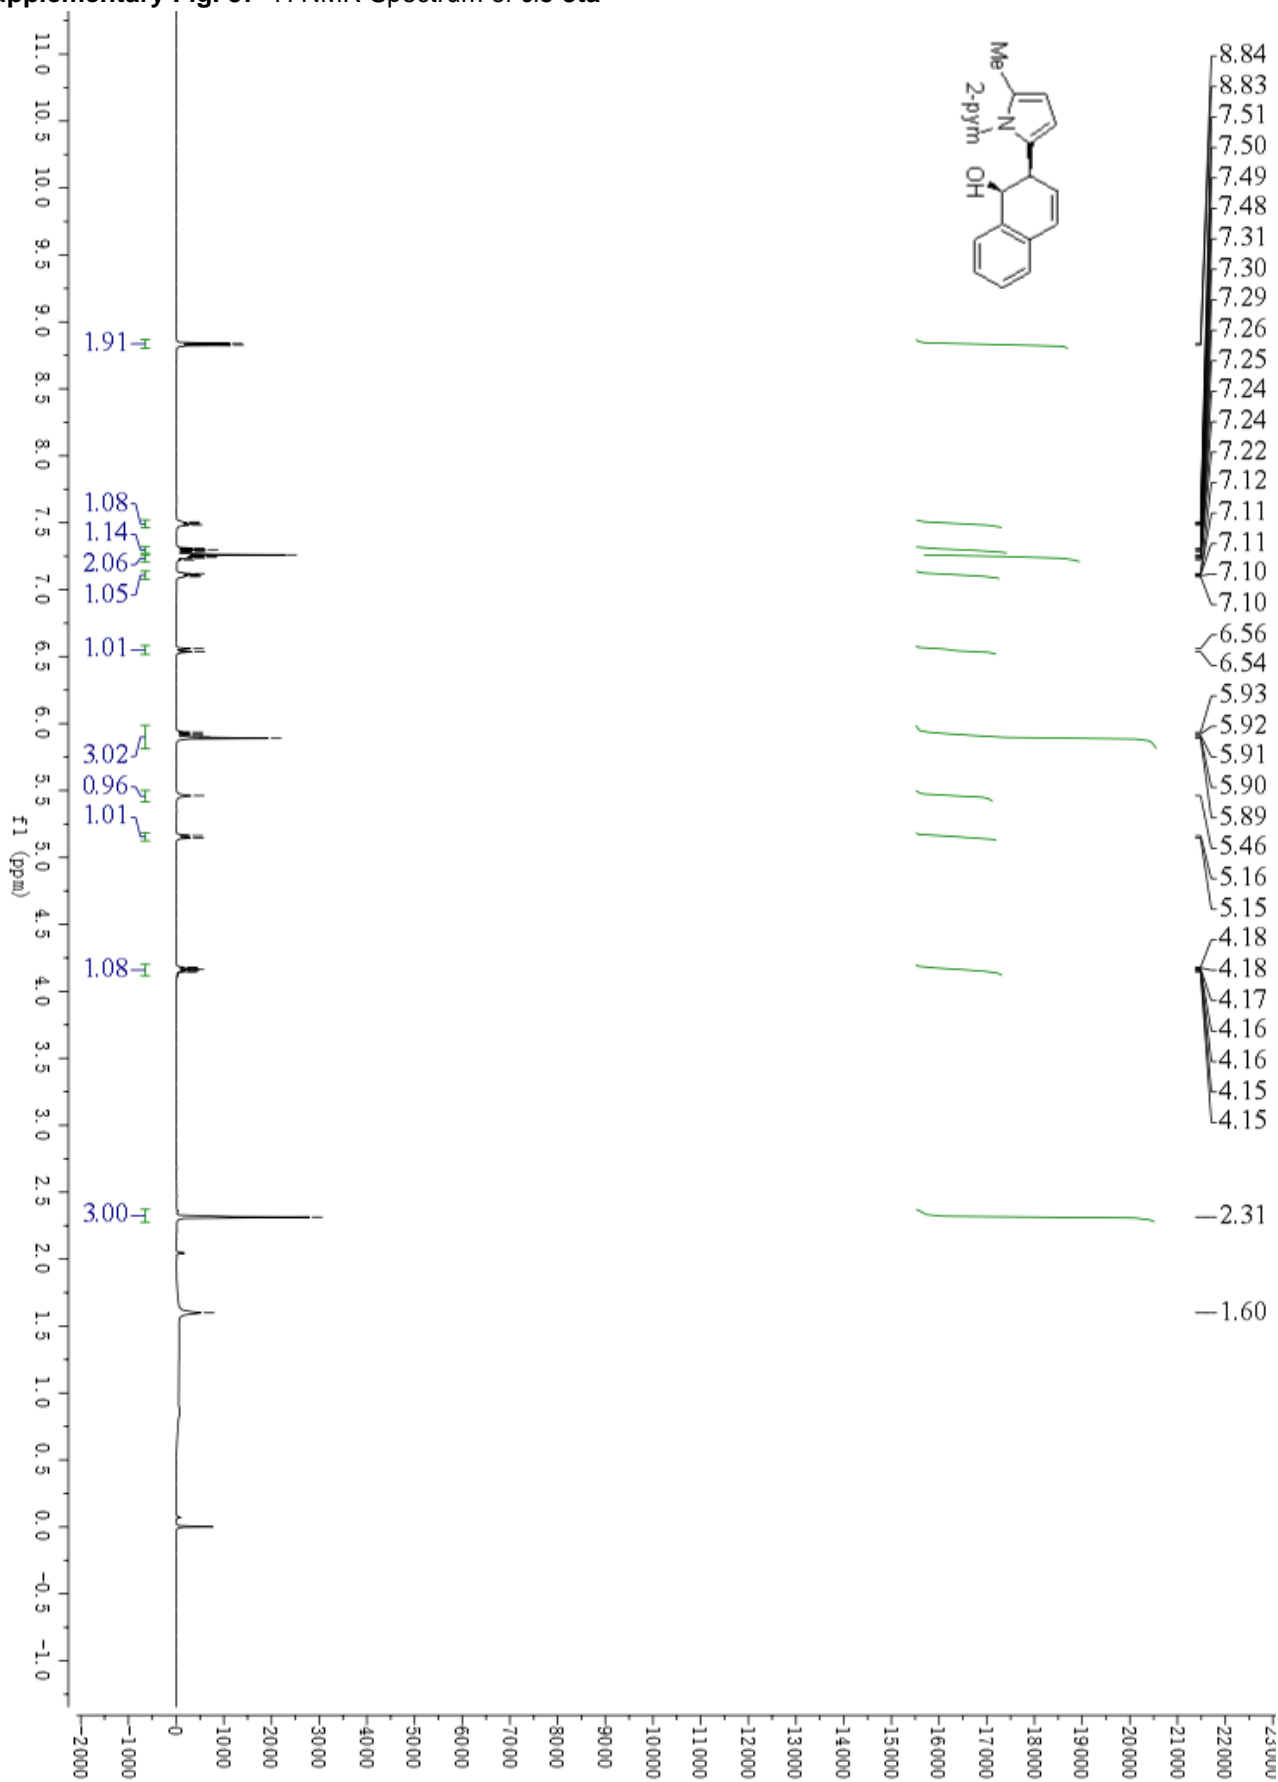

# SUPPLEMENTARY INFORMATION

**Supplementary Fig. 58**  $^{13}\text{C}$  NMR Spectrum of *cis*-3ta

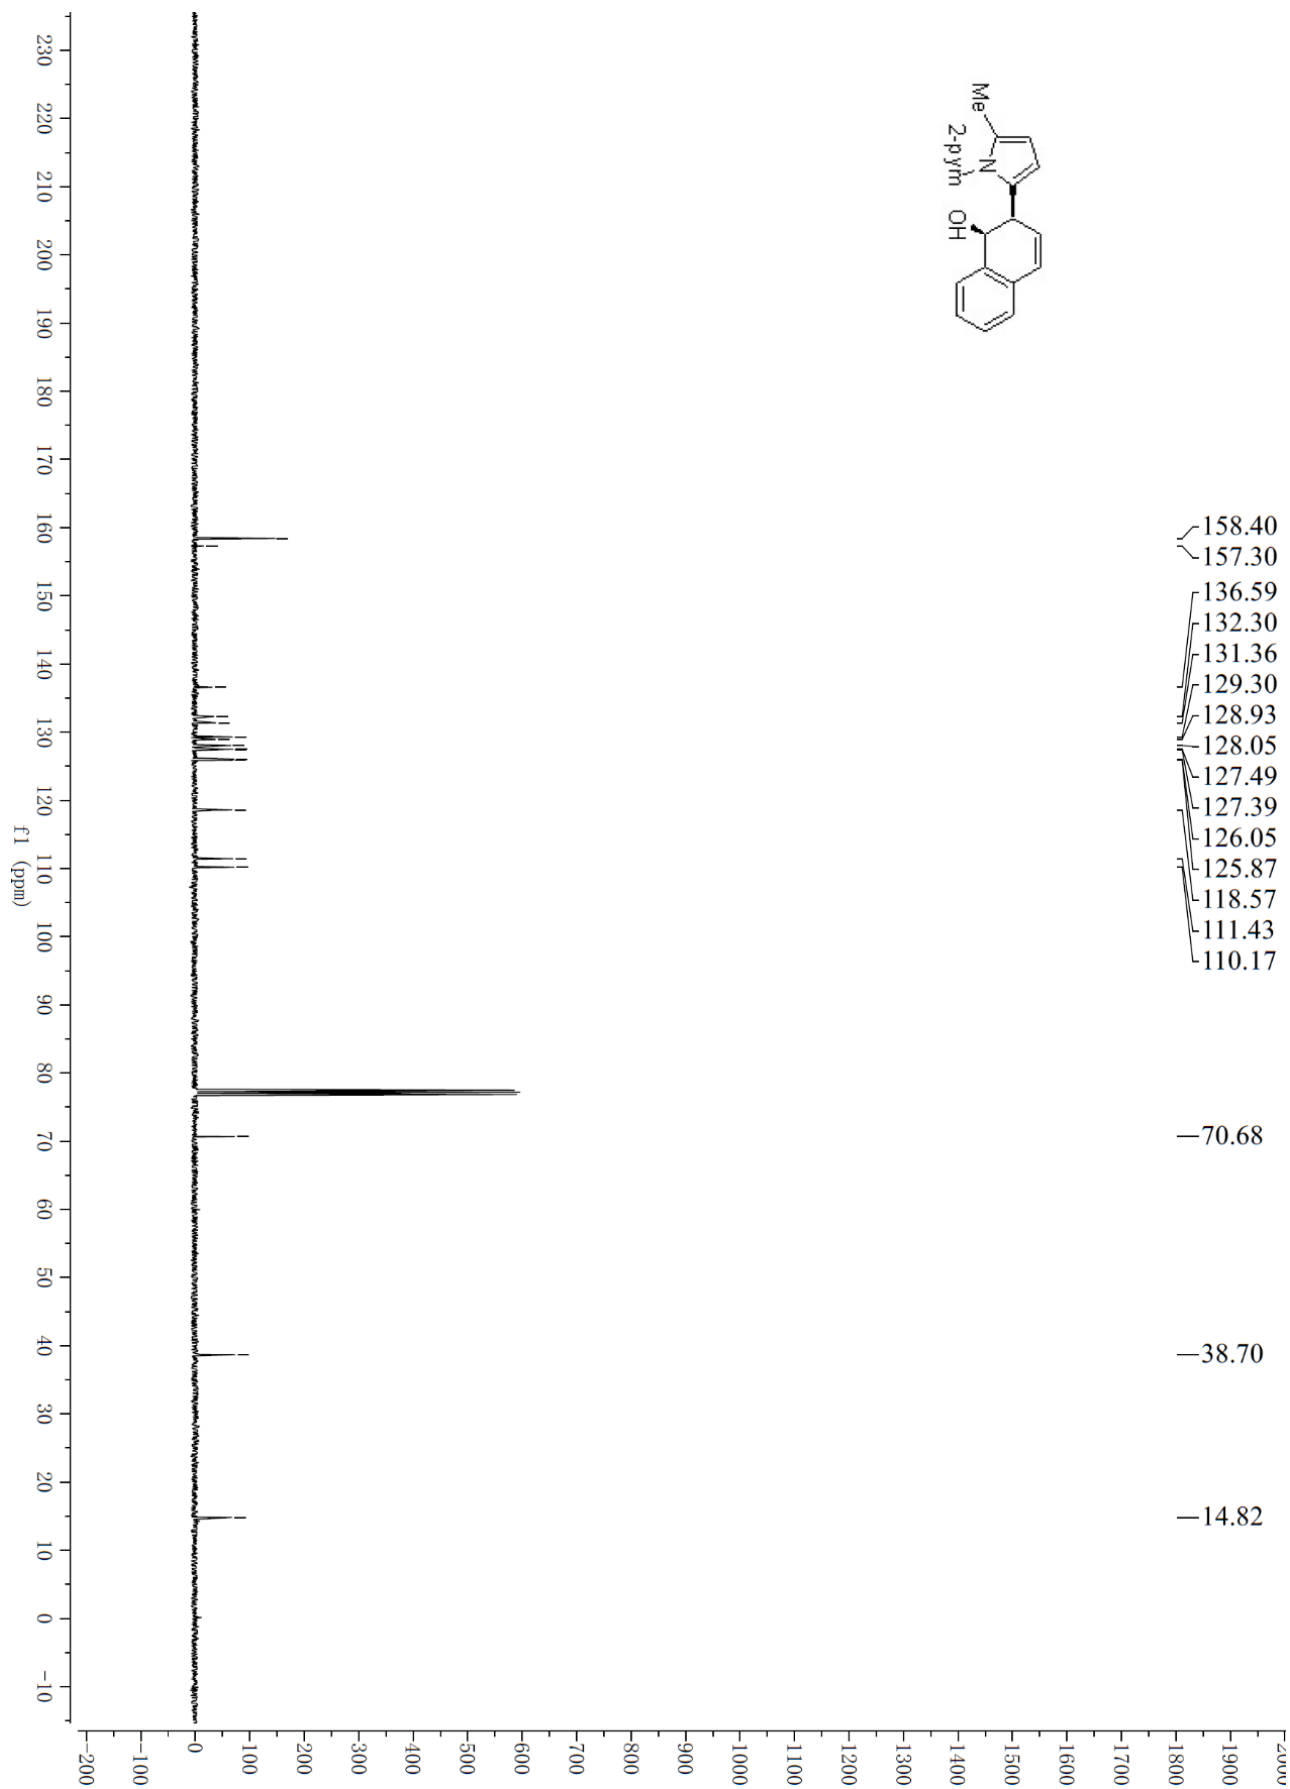

# SUPPLEMENTARY INFORMATION

**Supplementary Fig. 59**  $^1\text{H}$  NMR Spectrum of *cis*-3ua

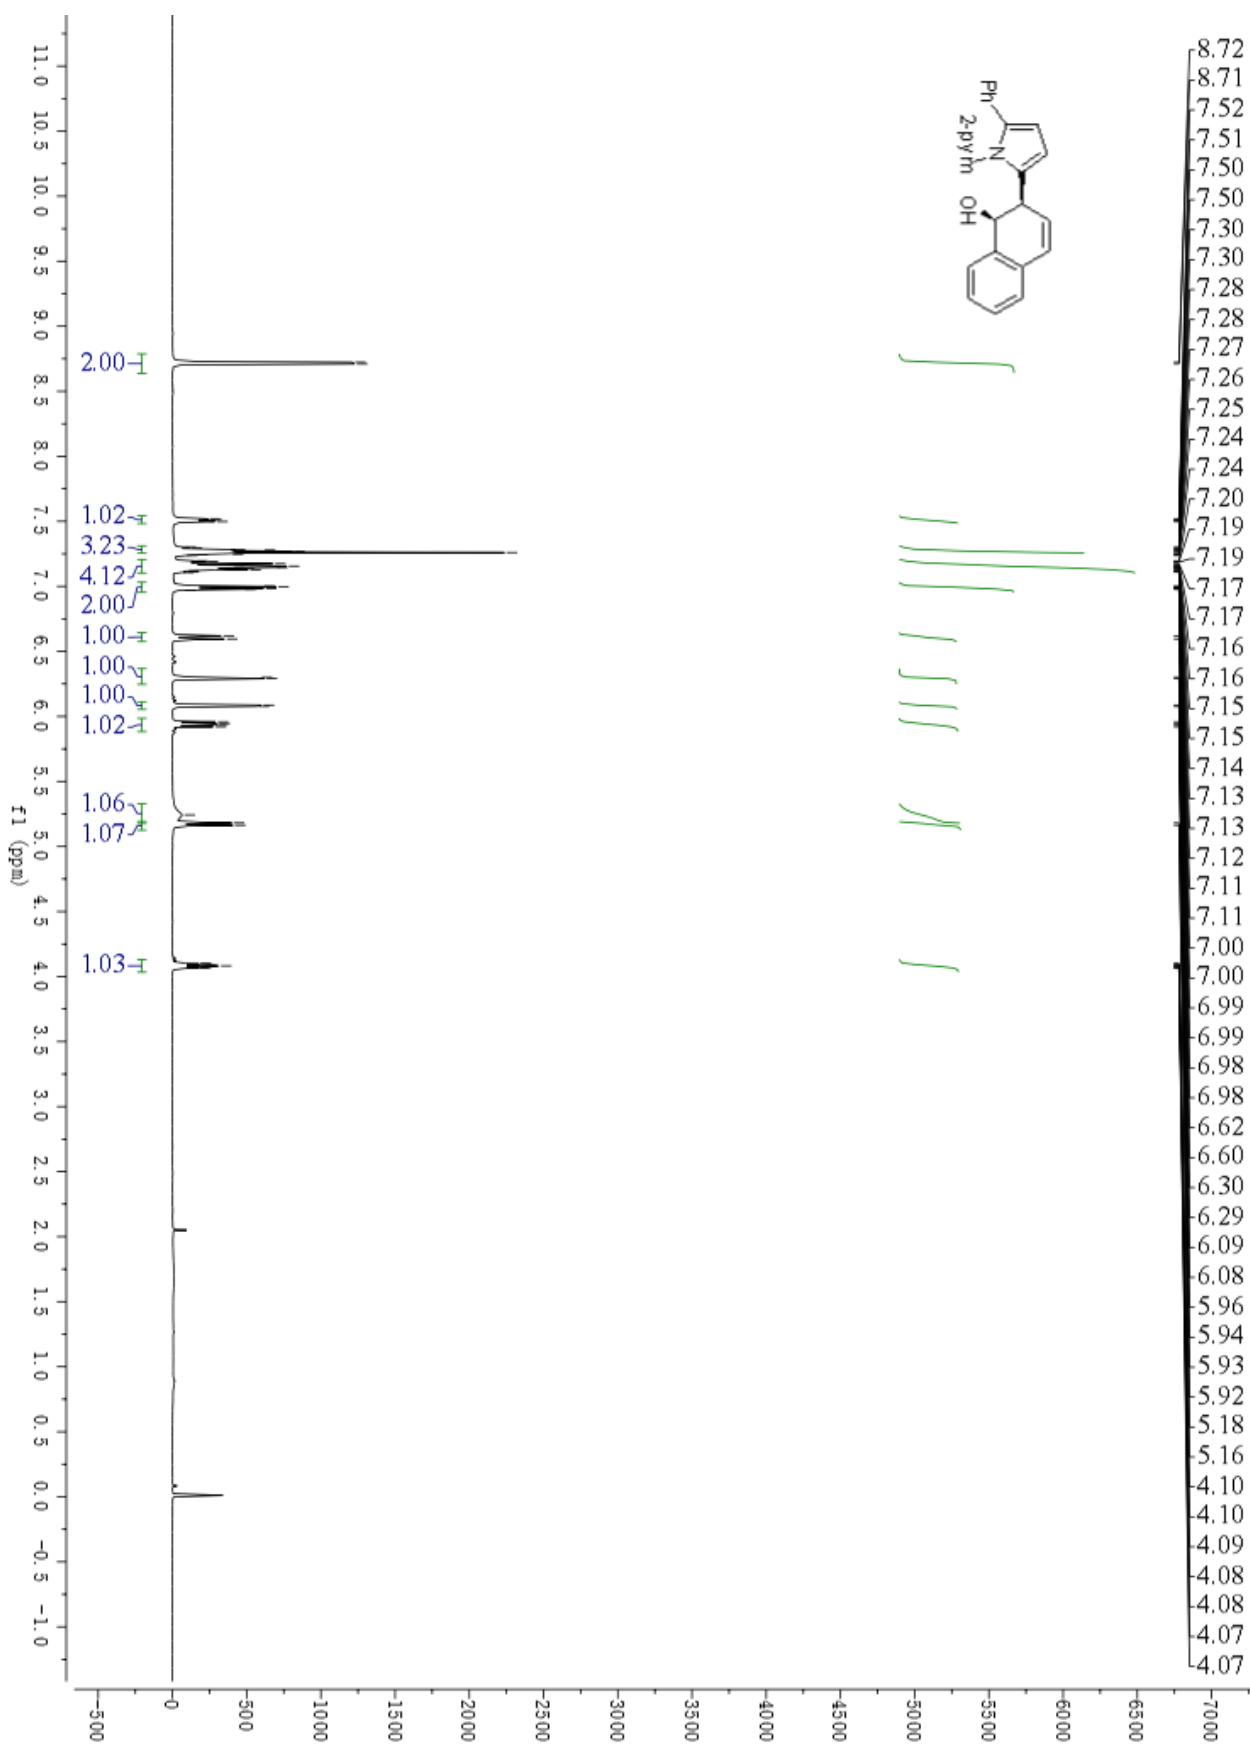

# SUPPLEMENTARY INFORMATION

**Supplementary Fig. 60**  $^{13}\text{C}$  NMR Spectrum of *cis*-3ua

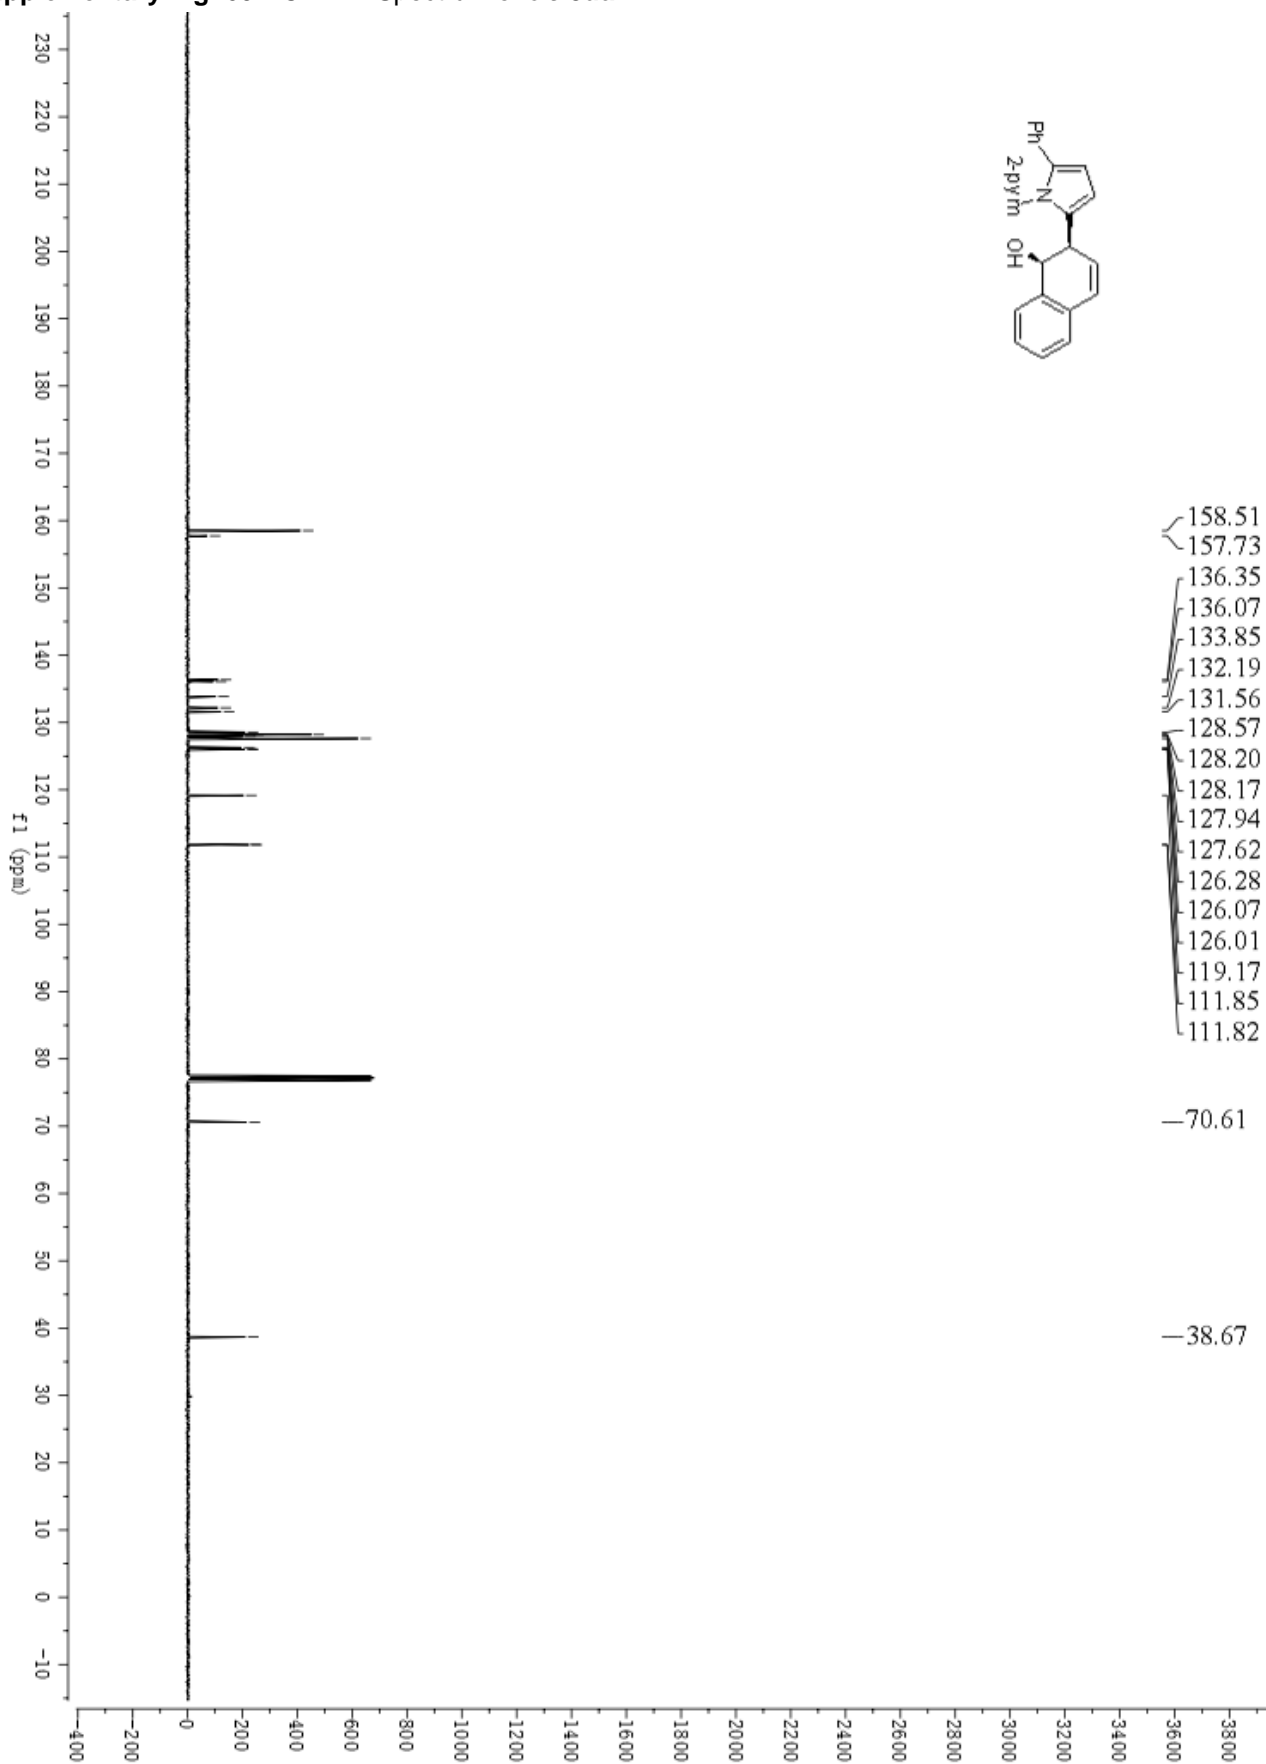

# SUPPLEMENTARY INFORMATION

**Supplementary Fig. 61**  $^1\text{H}$  NMR Spectrum of *cis*-3va

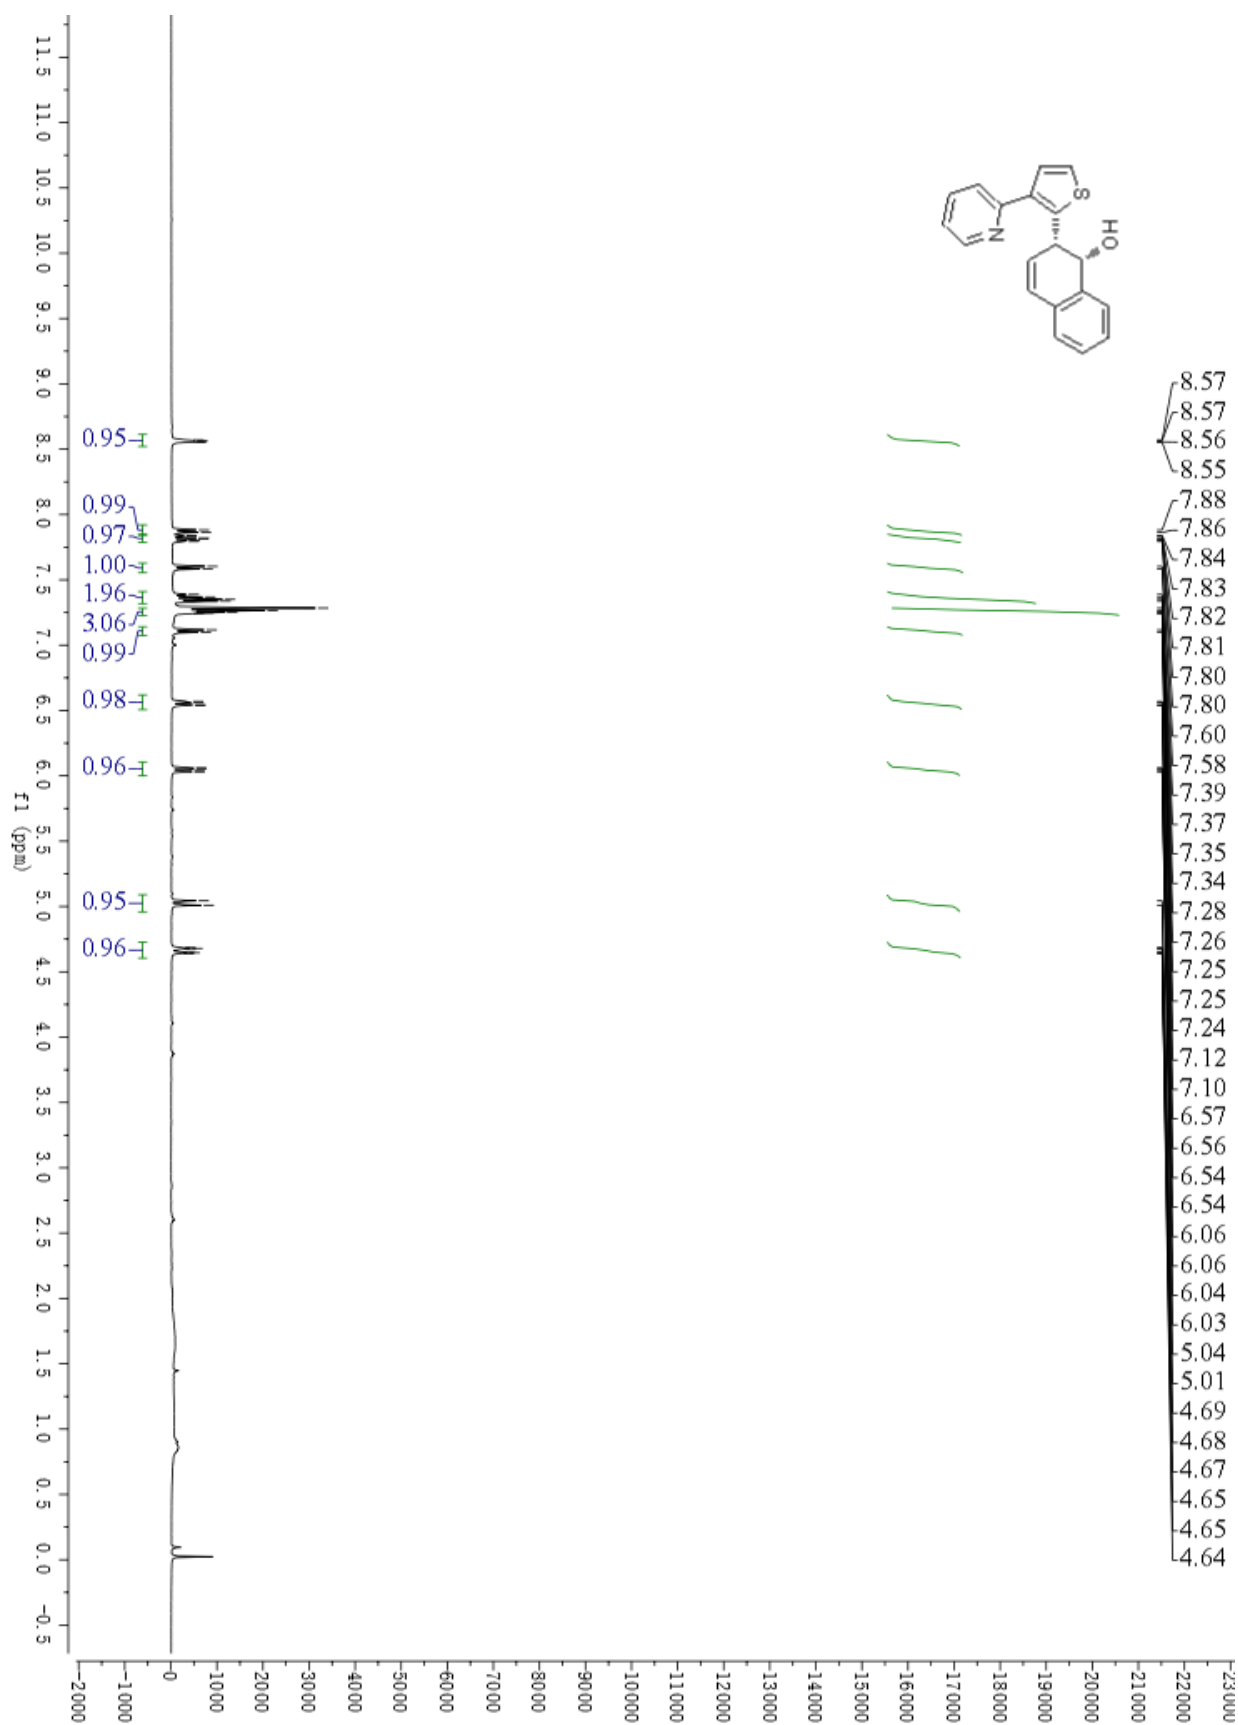



# SUPPLEMENTARY INFORMATION

**Supplementary Fig. 62**  $^{13}\text{C}$  NMR Spectrum of *cis*-3va

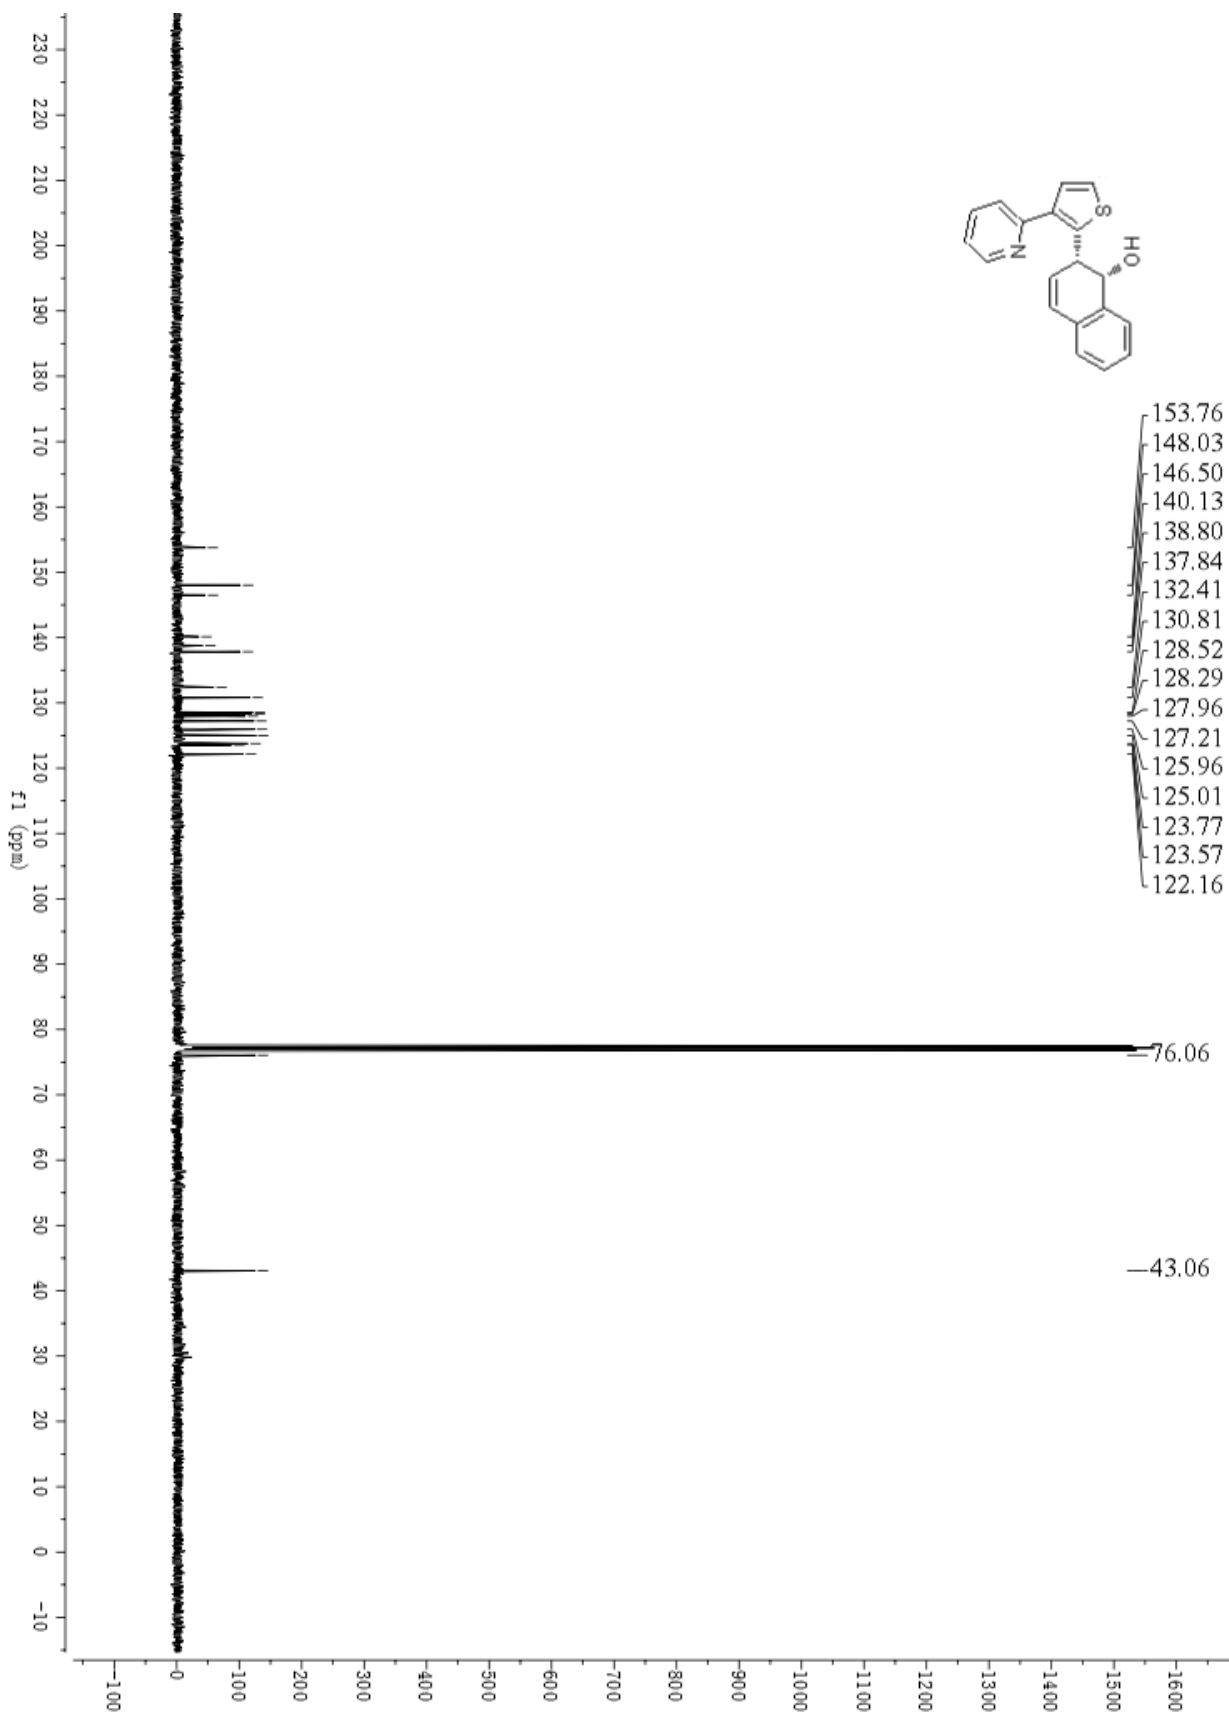

# SUPPLEMENTARY INFORMATION

**Supplementary Fig. 63**  $^1\text{H}$  NMR Spectrum of *cis*-3wa

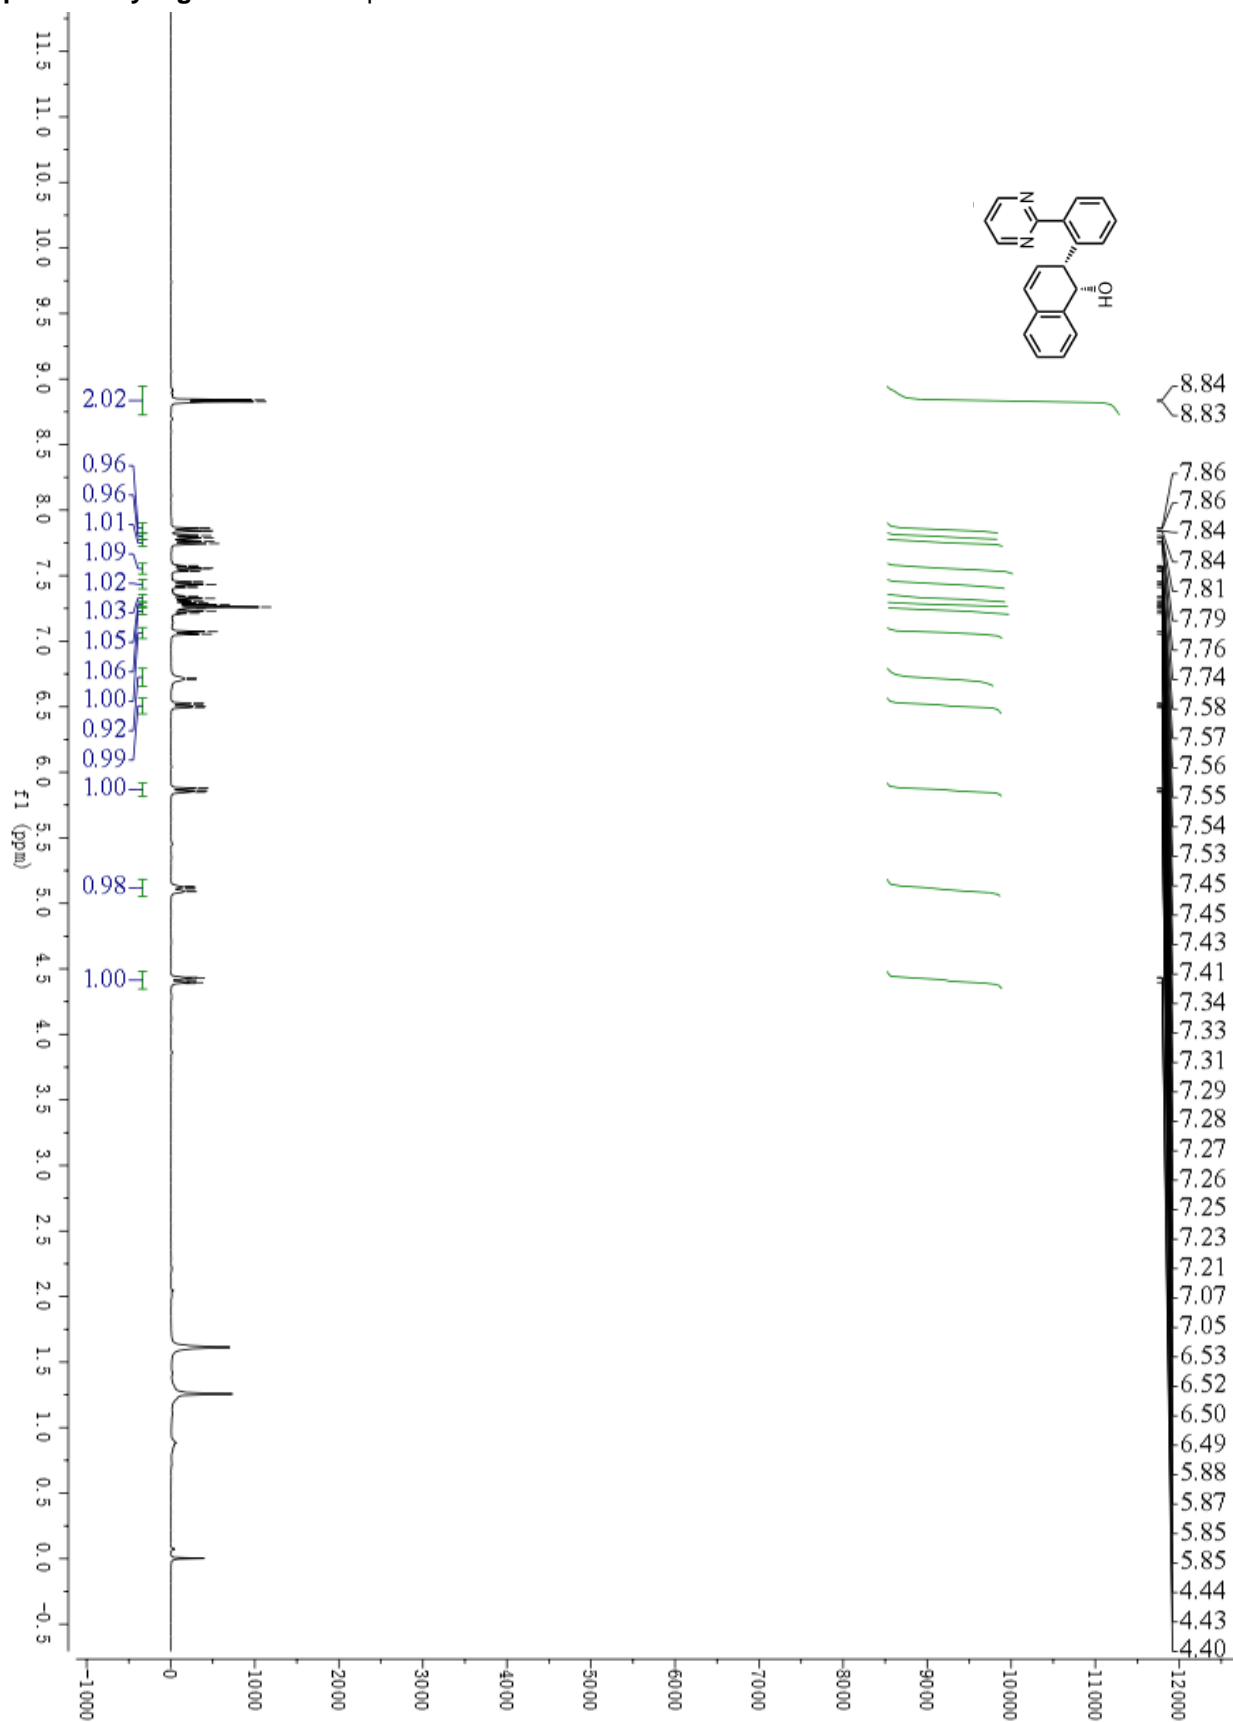

# SUPPLEMENTARY INFORMATION

**Supplementary Fig. 64**  $^{13}\text{C}$  NMR Spectrum of *cis*-3wa

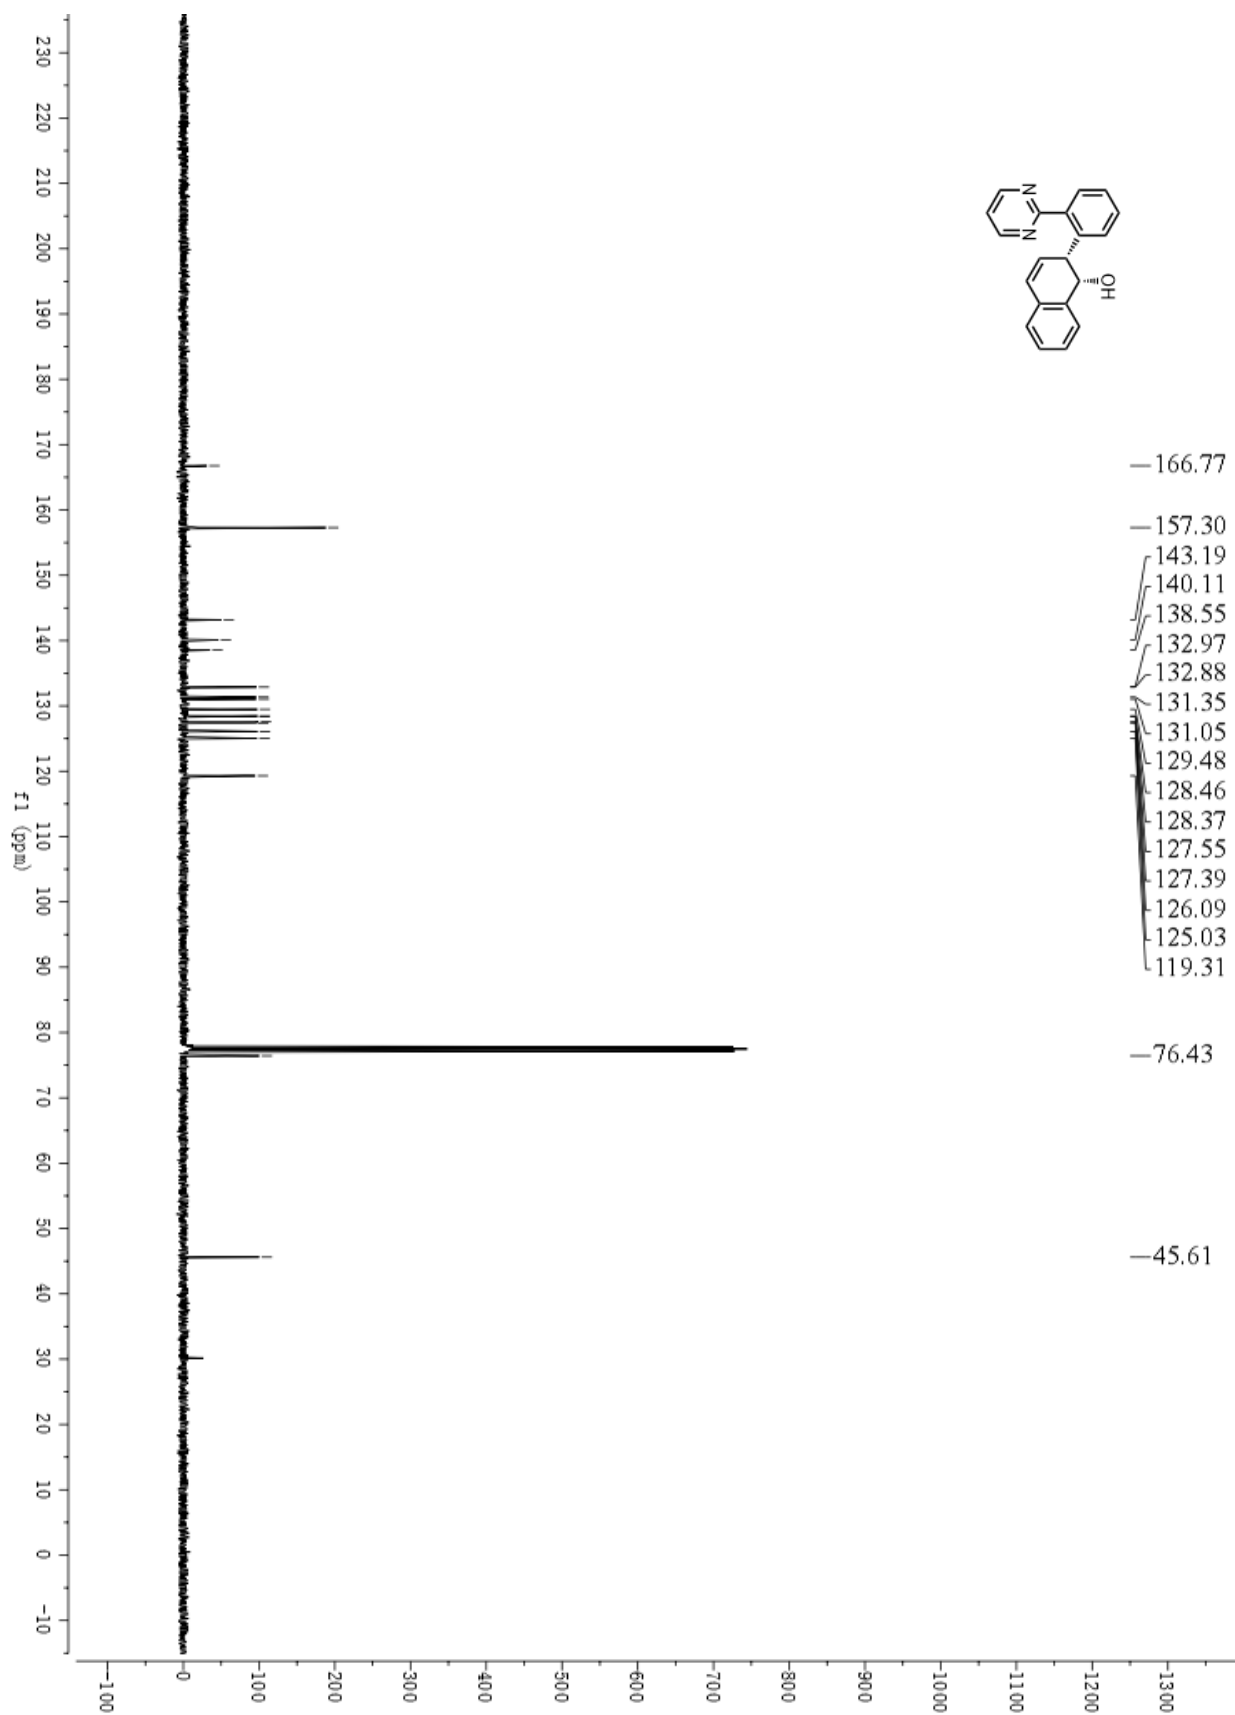

# SUPPLEMENTARY INFORMATION

**Supplementary Fig. 65**  $^1\text{H}$  NMR Spectrum of *cis*-3ab

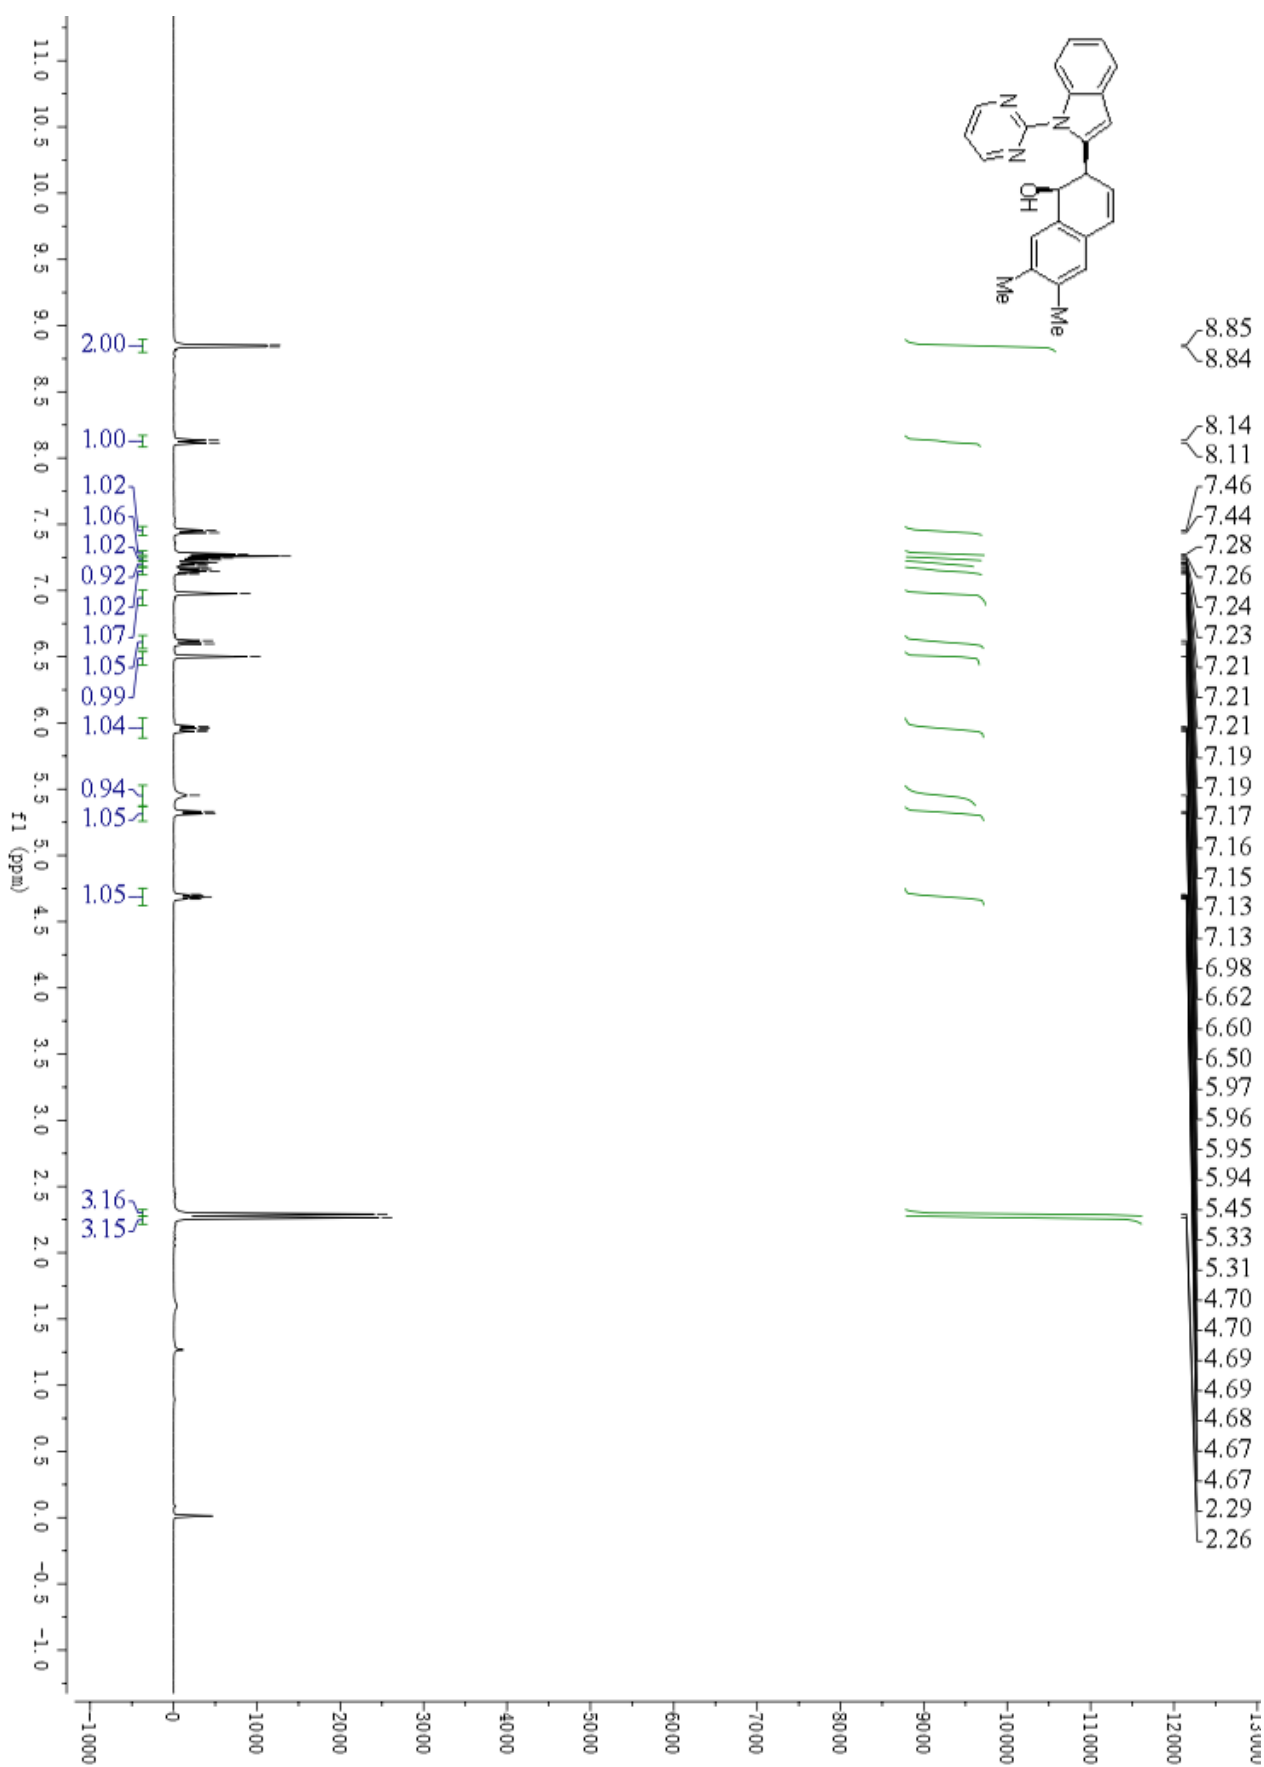

# SUPPLEMENTARY INFORMATION

**Supplementary Fig. 66**  $^{13}\text{C}$  NMR Spectrum of *cis*-3ab

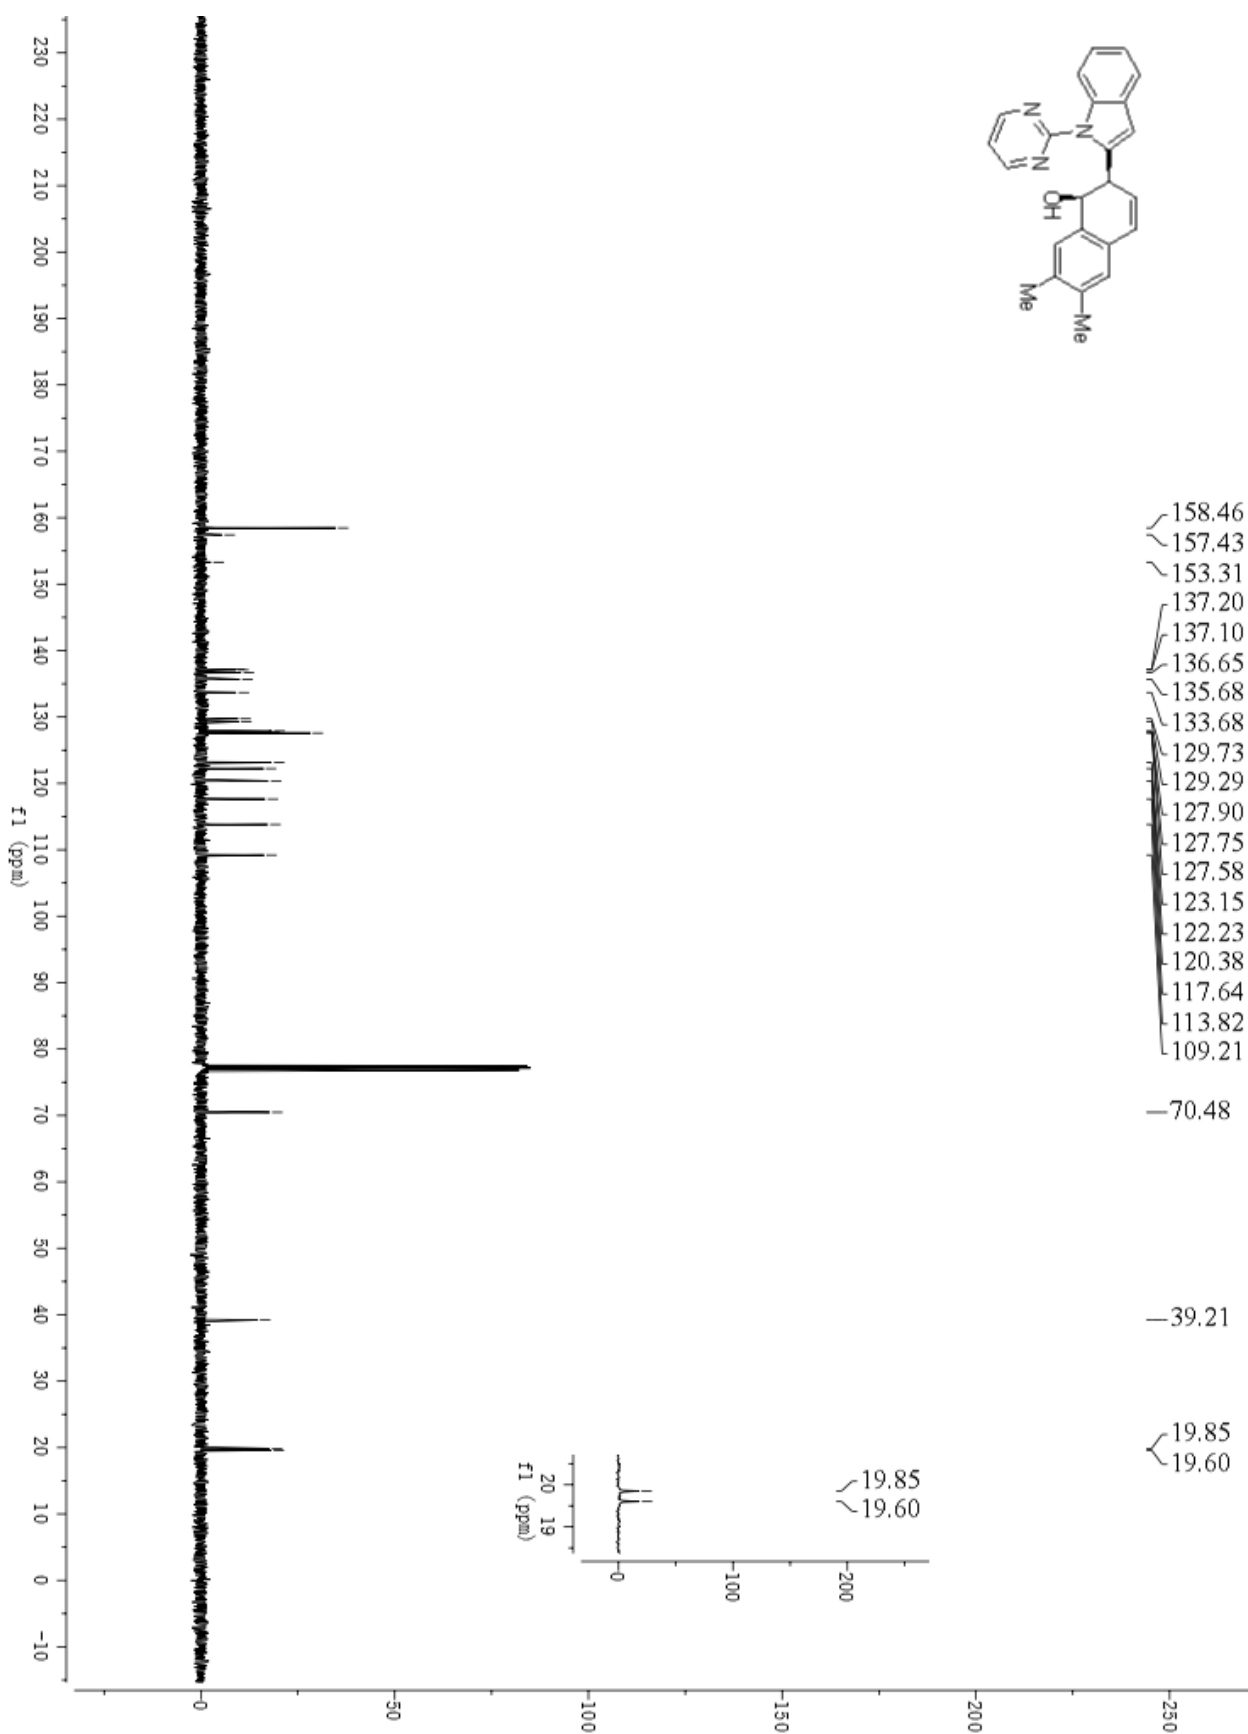

# SUPPLEMENTARY INFORMATION

**Supplementary Fig. 67**  $^1\text{H}$  NMR Spectrum of *cis*-3ac

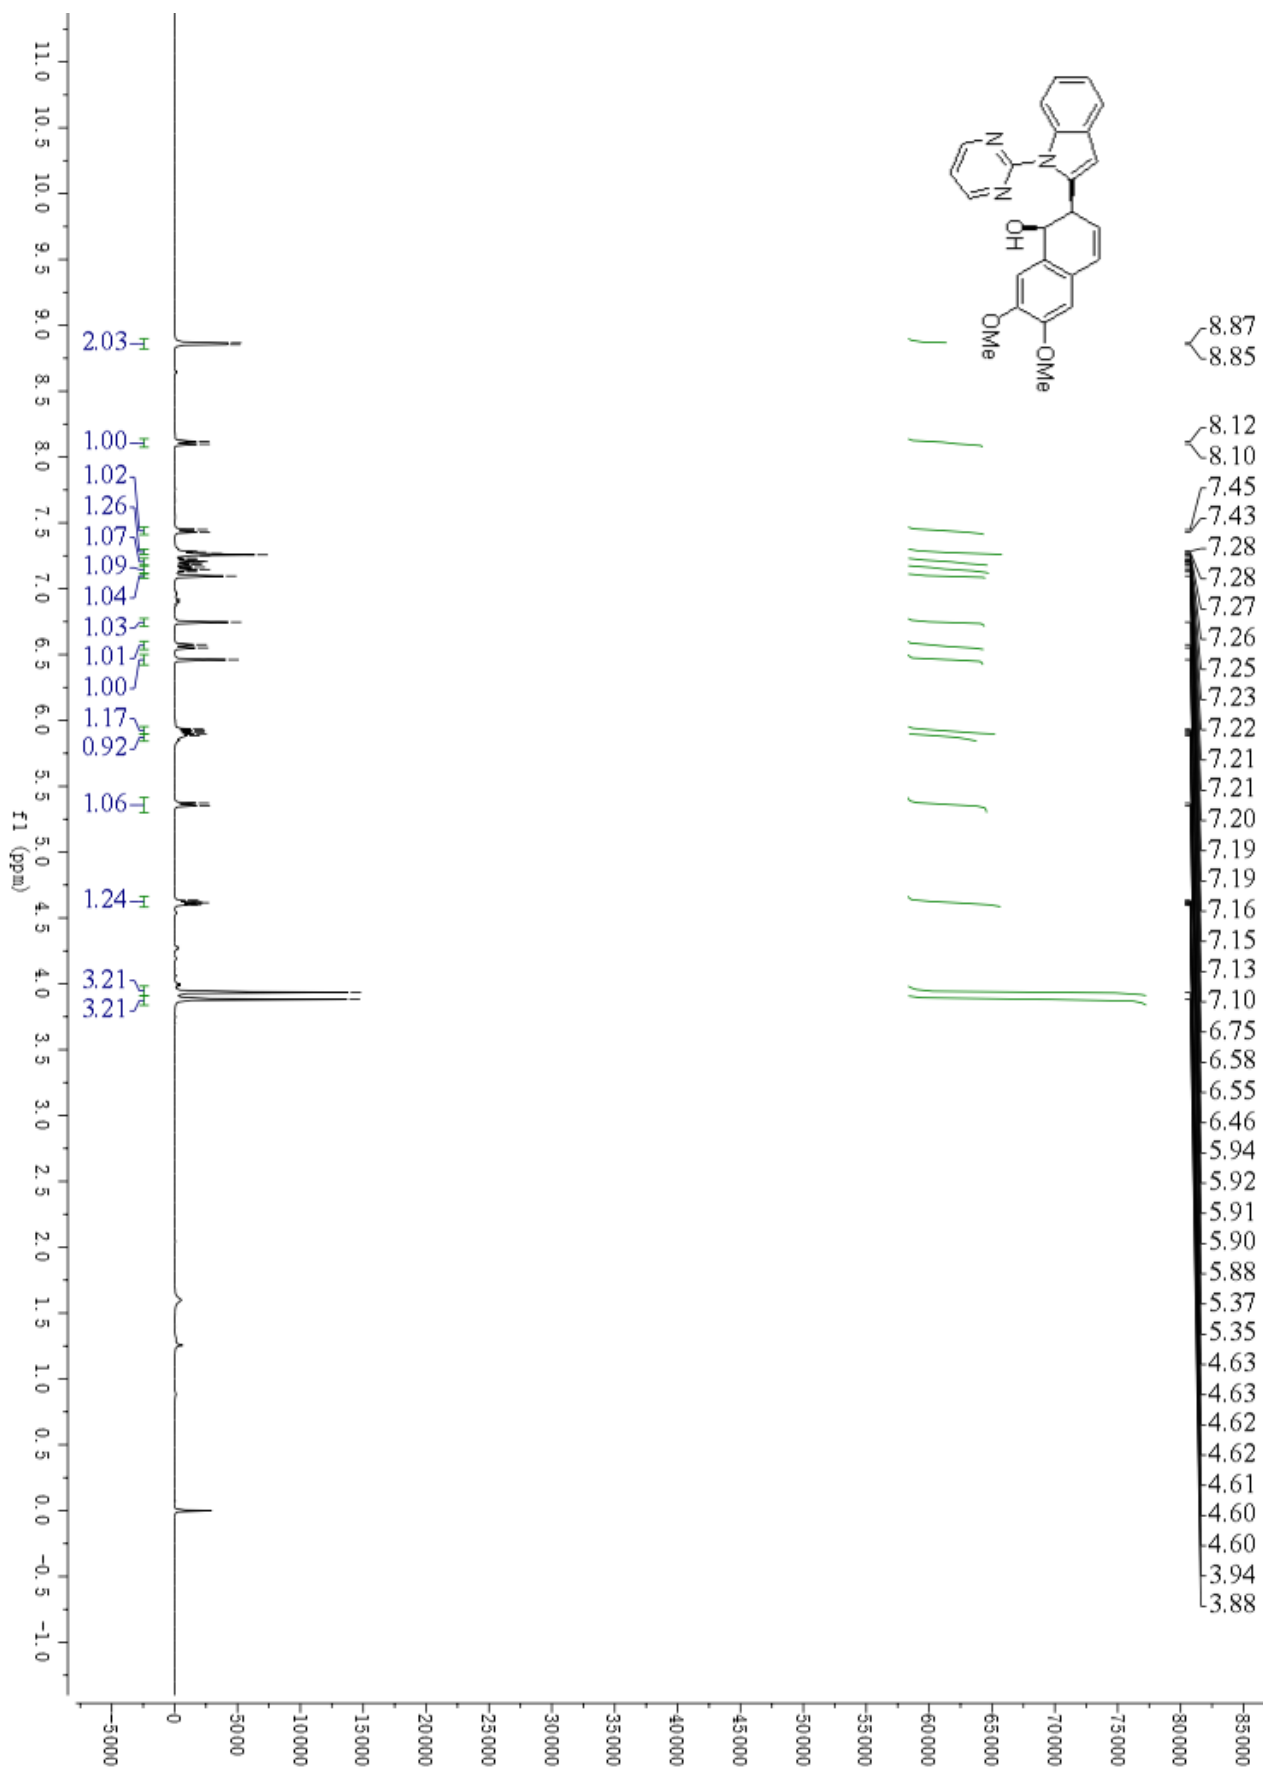

# SUPPLEMENTARY INFORMATION

**Supplementary Fig. 68**  $^{13}\text{C}$  NMR Spectrum of *cis*-3ac

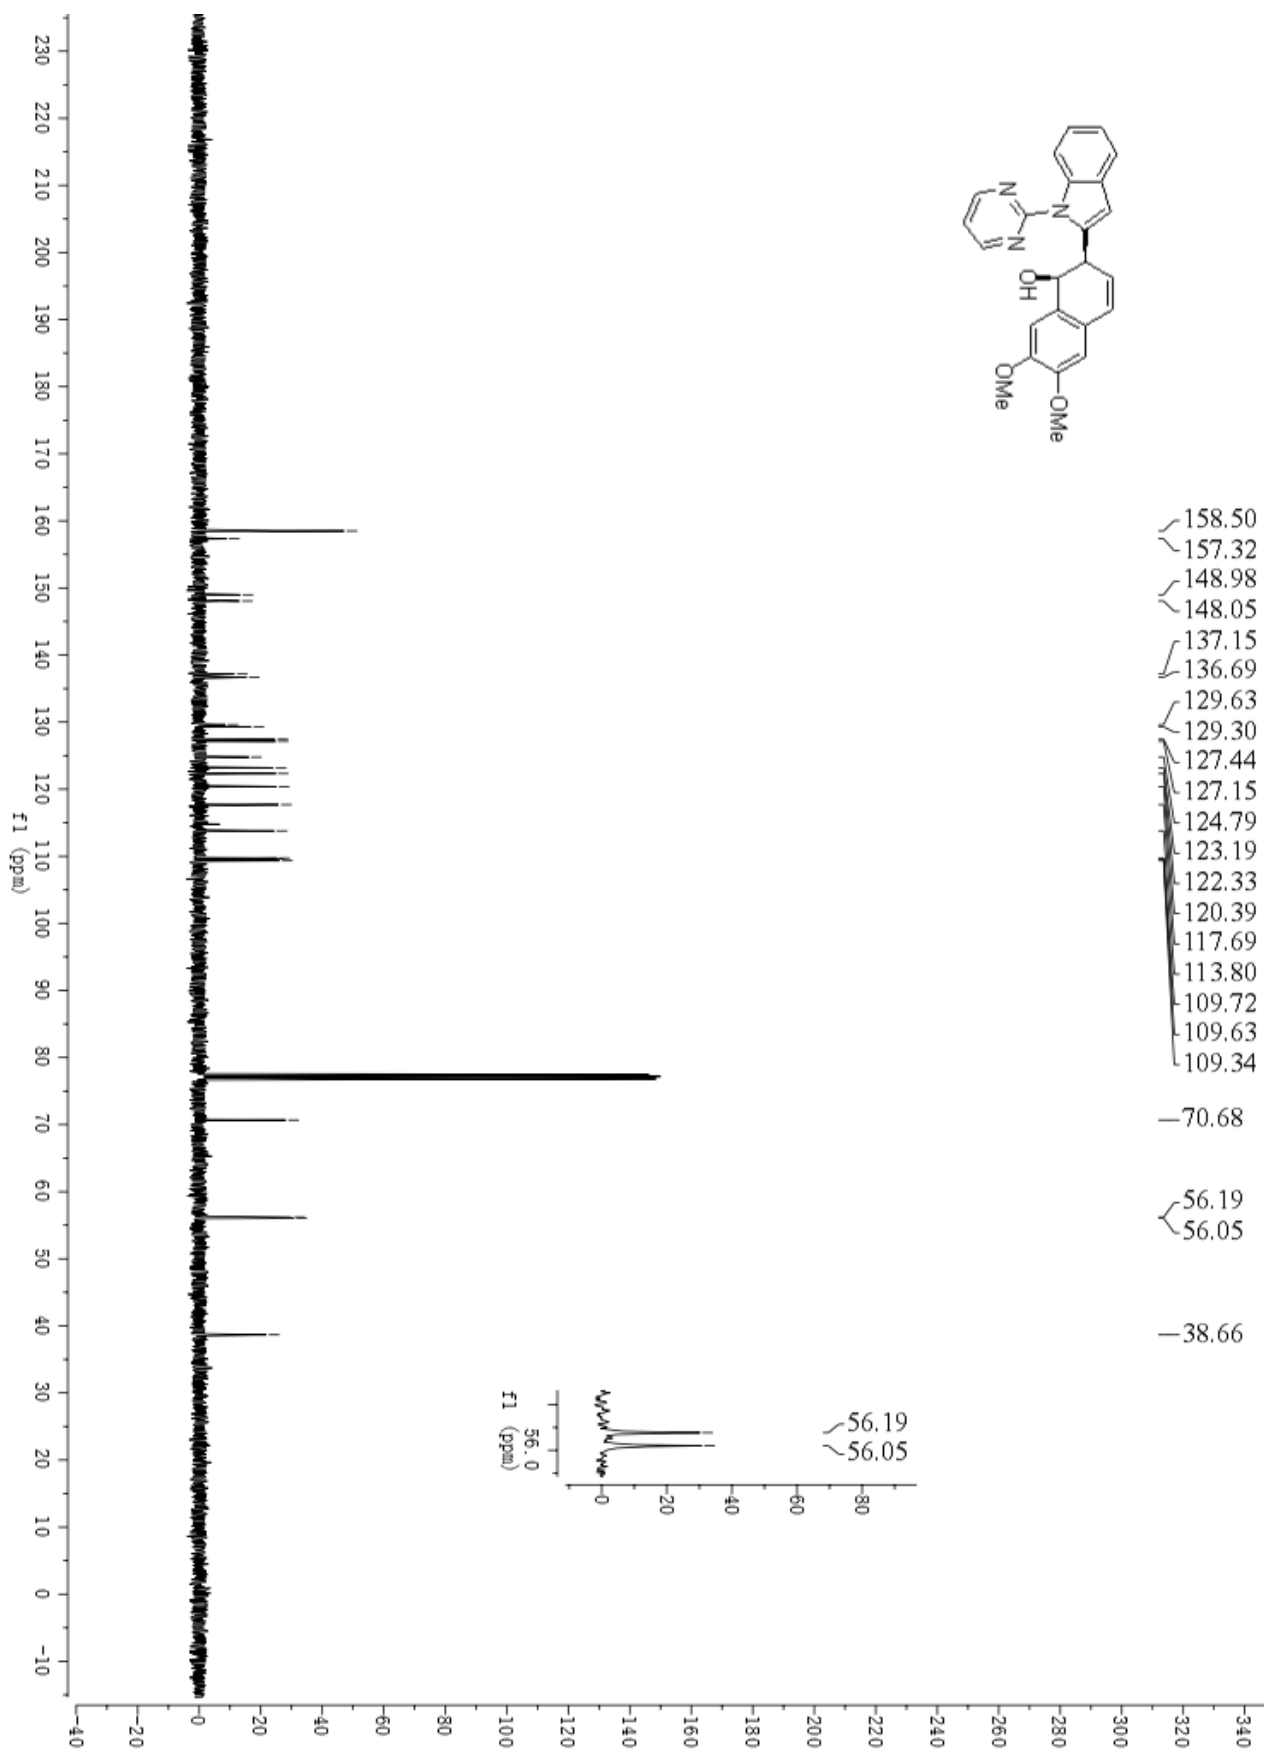

# SUPPLEMENTARY INFORMATION

**Supplementary Fig. 69**  $^1\text{H}$  NMR Spectrum of *cis*-3ad

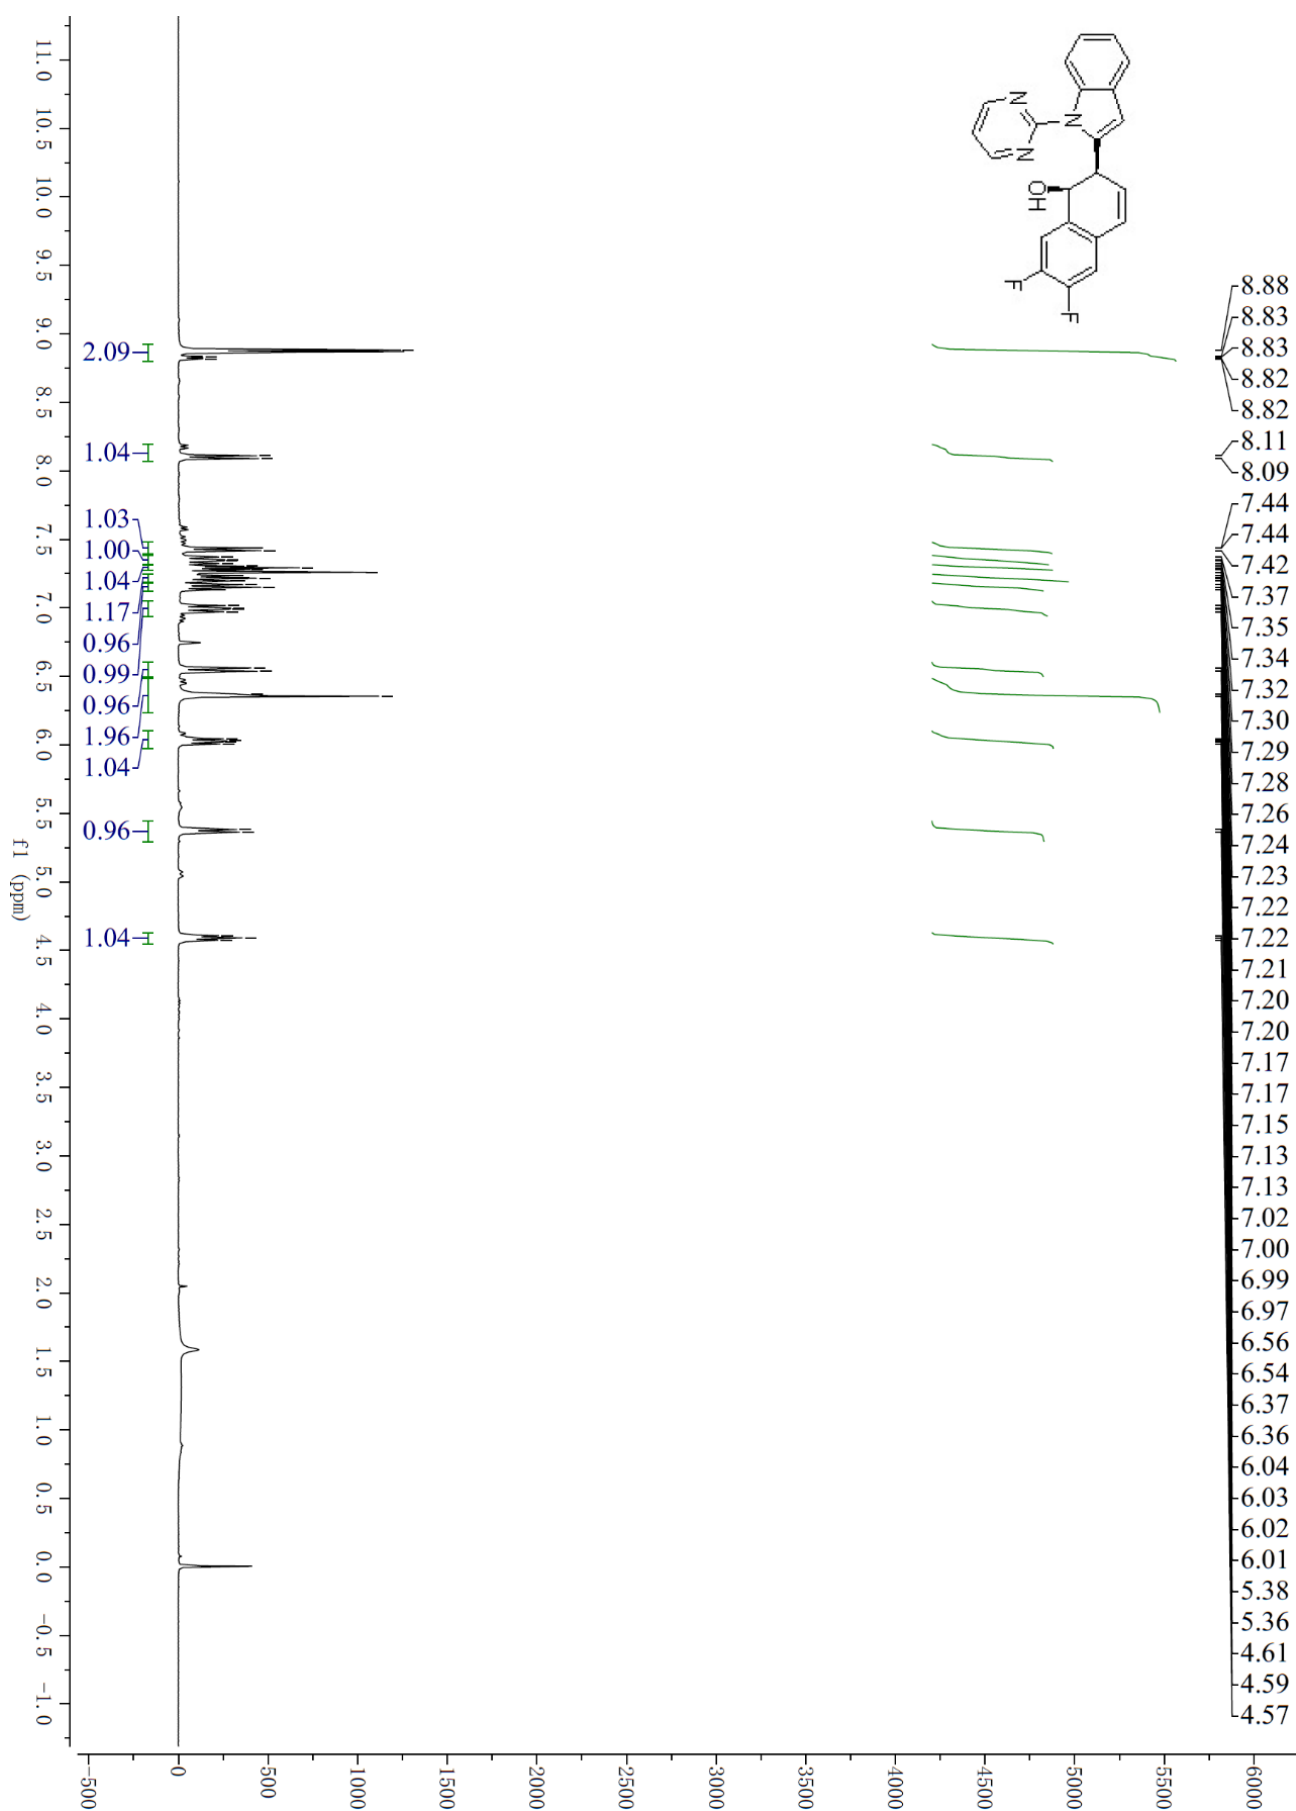



# SUPPLEMENTARY INFORMATION

**Supplementary Fig. 70**  $^{13}\text{C}$  NMR Spectrum of *cis*-3ad

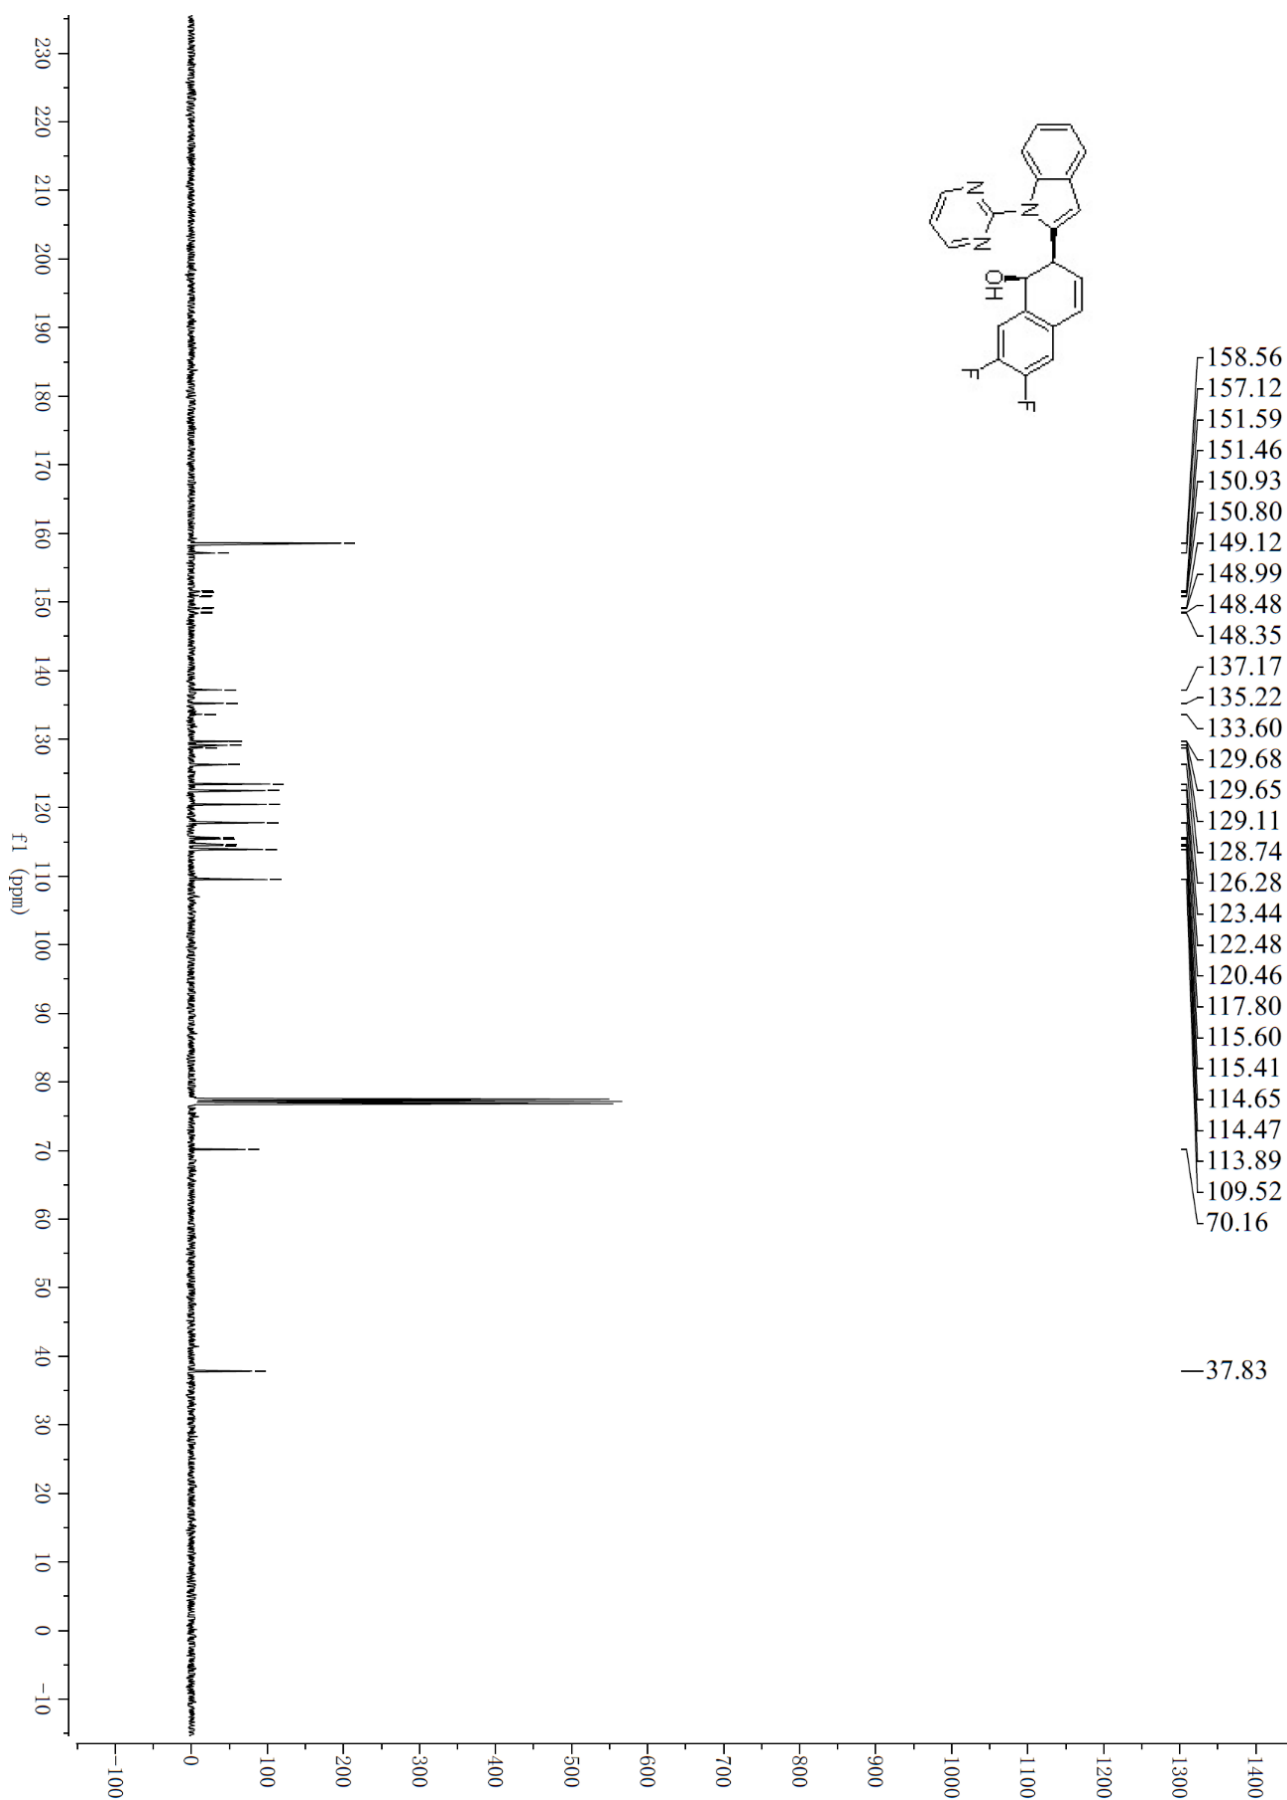

# SUPPLEMENTARY INFORMATION

**Supplementary Fig. 71**  $^{19}\text{F}$  NMR Spectrum of *cis*-3ad

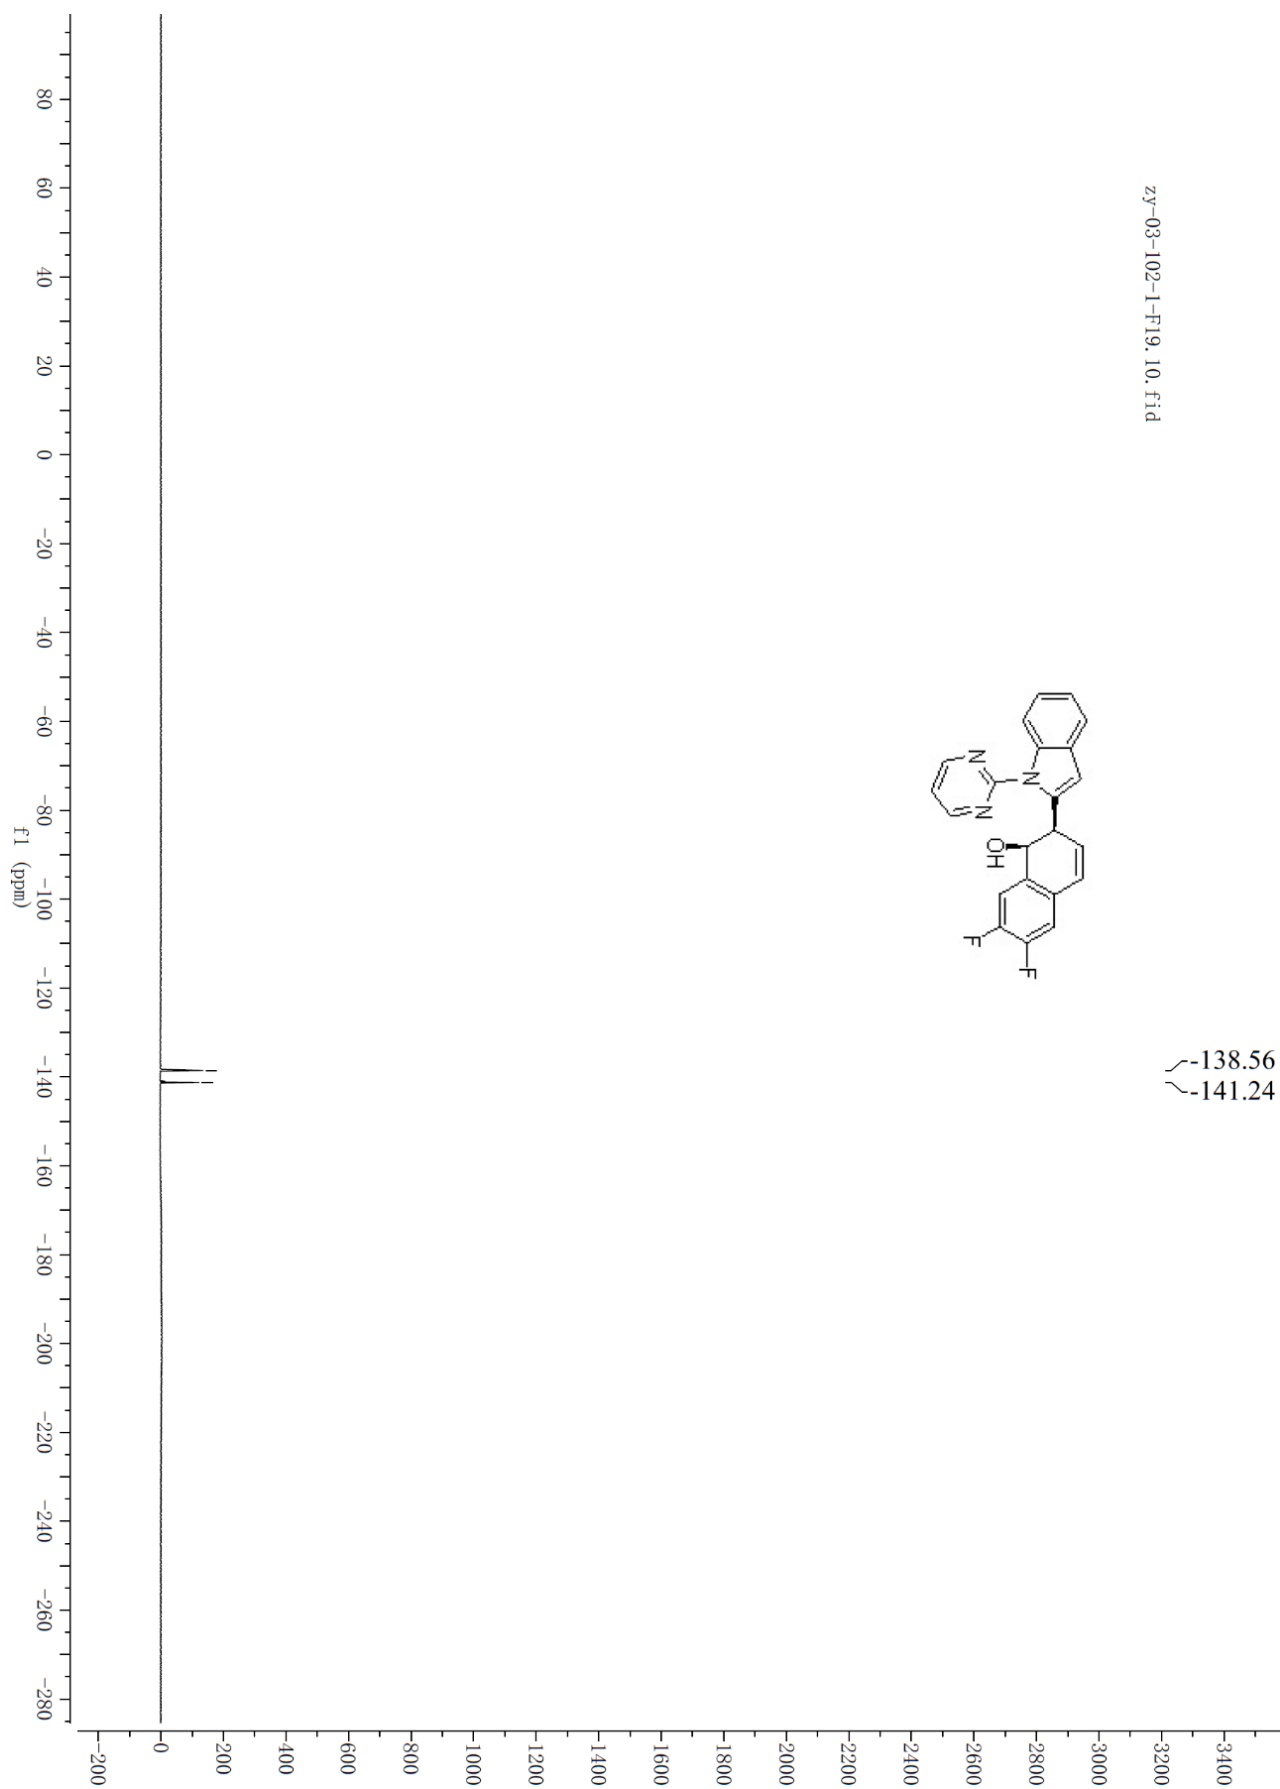

# SUPPLEMENTARY INFORMATION

**Supplementary Fig. 72**  $^1\text{H}$  NMR Spectrum of *cis*-3ae

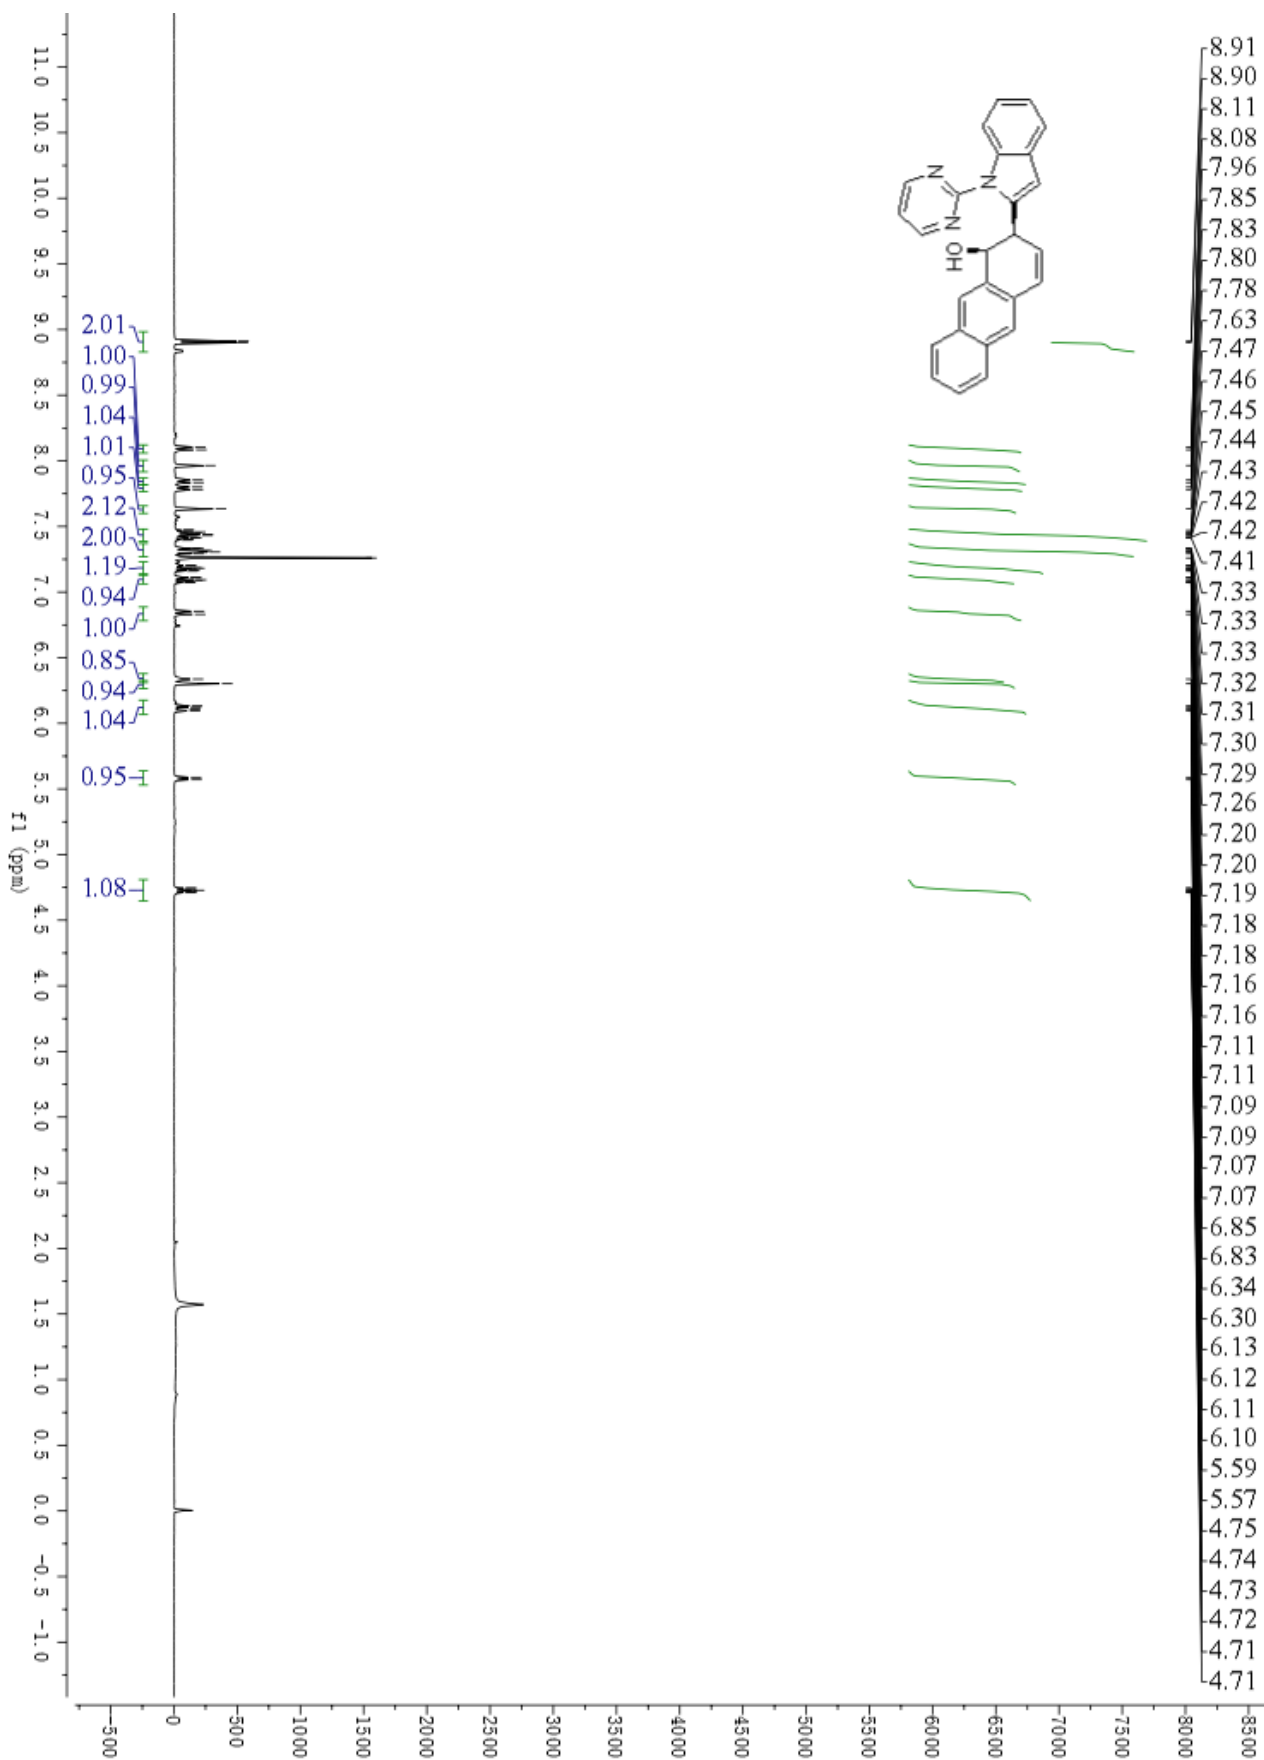

# SUPPLEMENTARY INFORMATION

**Supplementary Fig. 73**  $^{13}\text{C}$  NMR Spectrum of *cis*-3ae

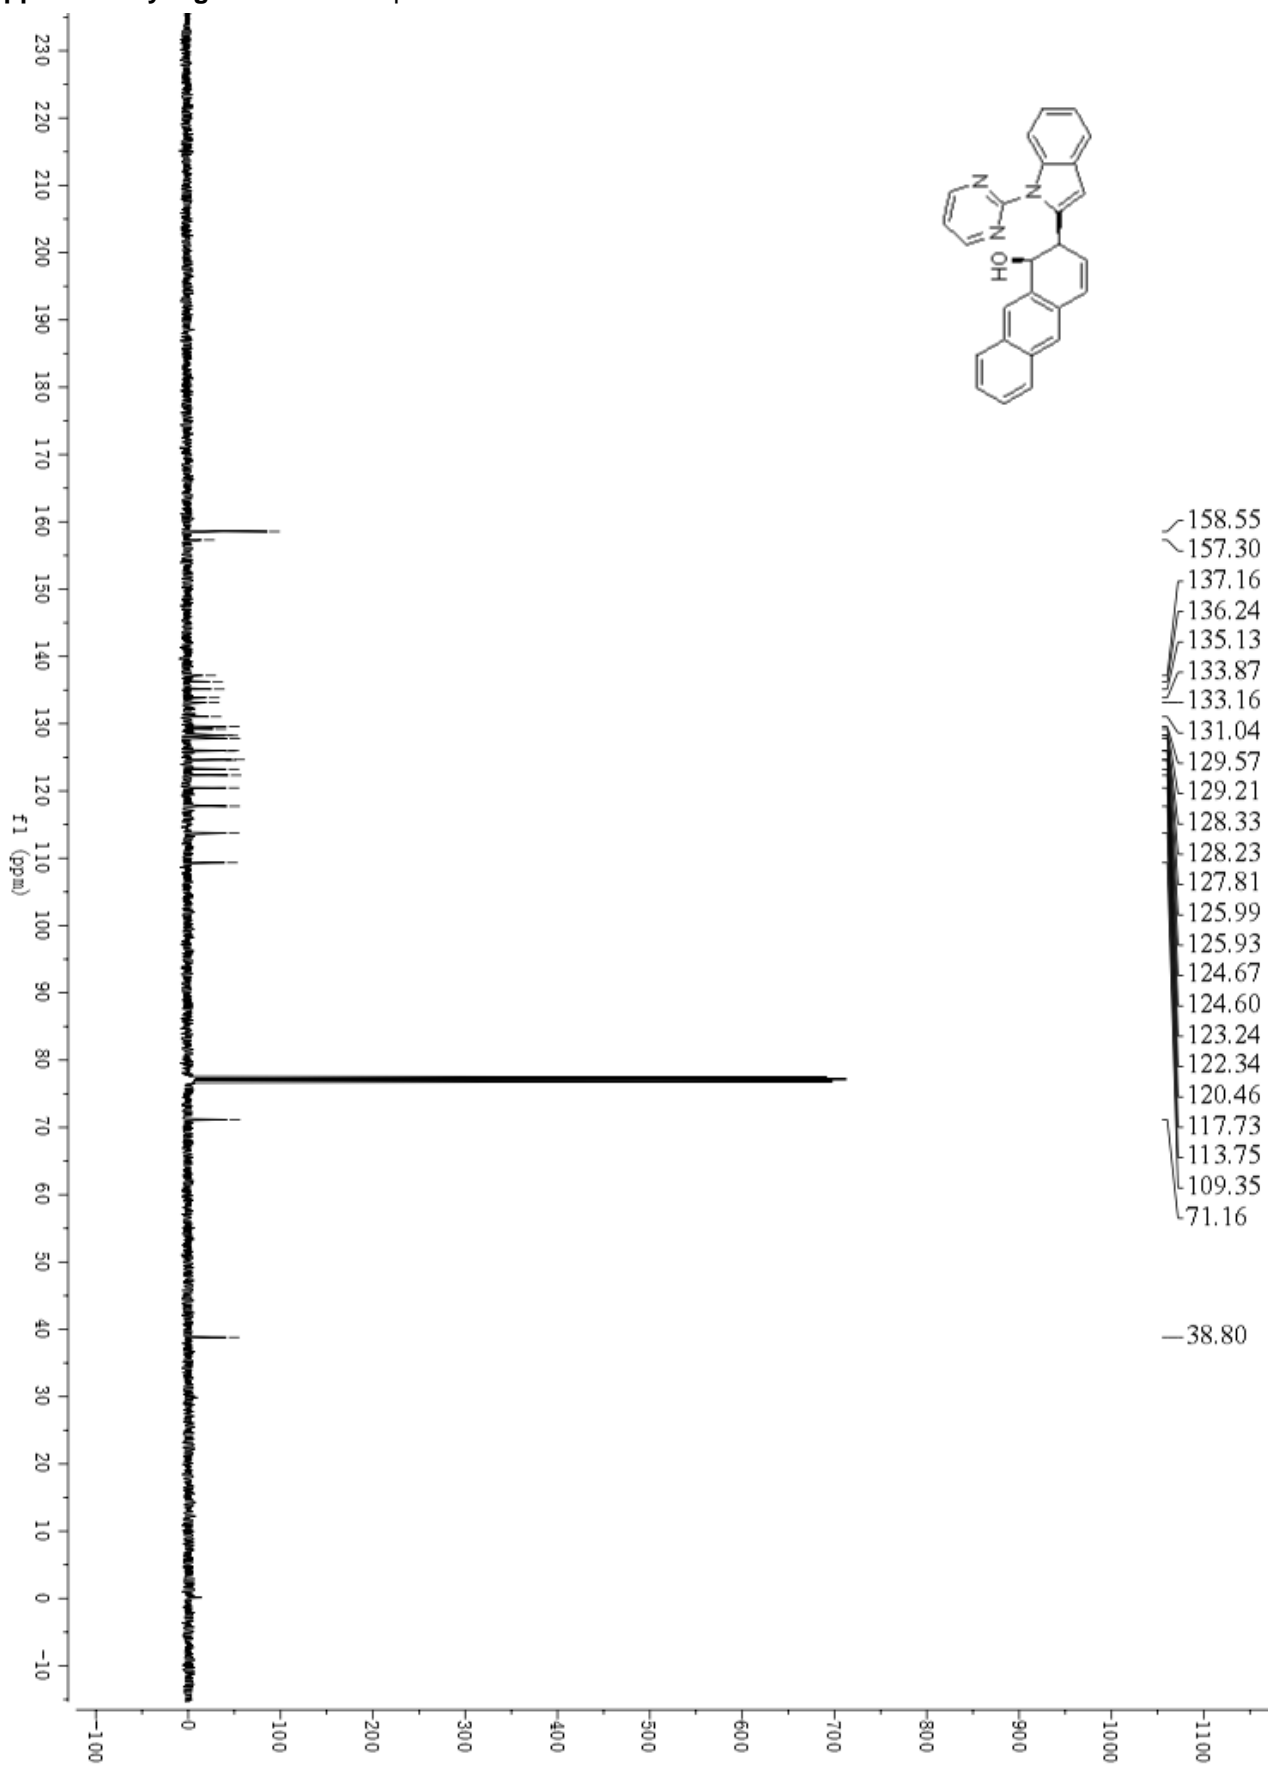

# SUPPLEMENTARY INFORMATION

**Supplementary Fig. 74**  $^1\text{H}$  NMR Spectrum of *cis*-3af

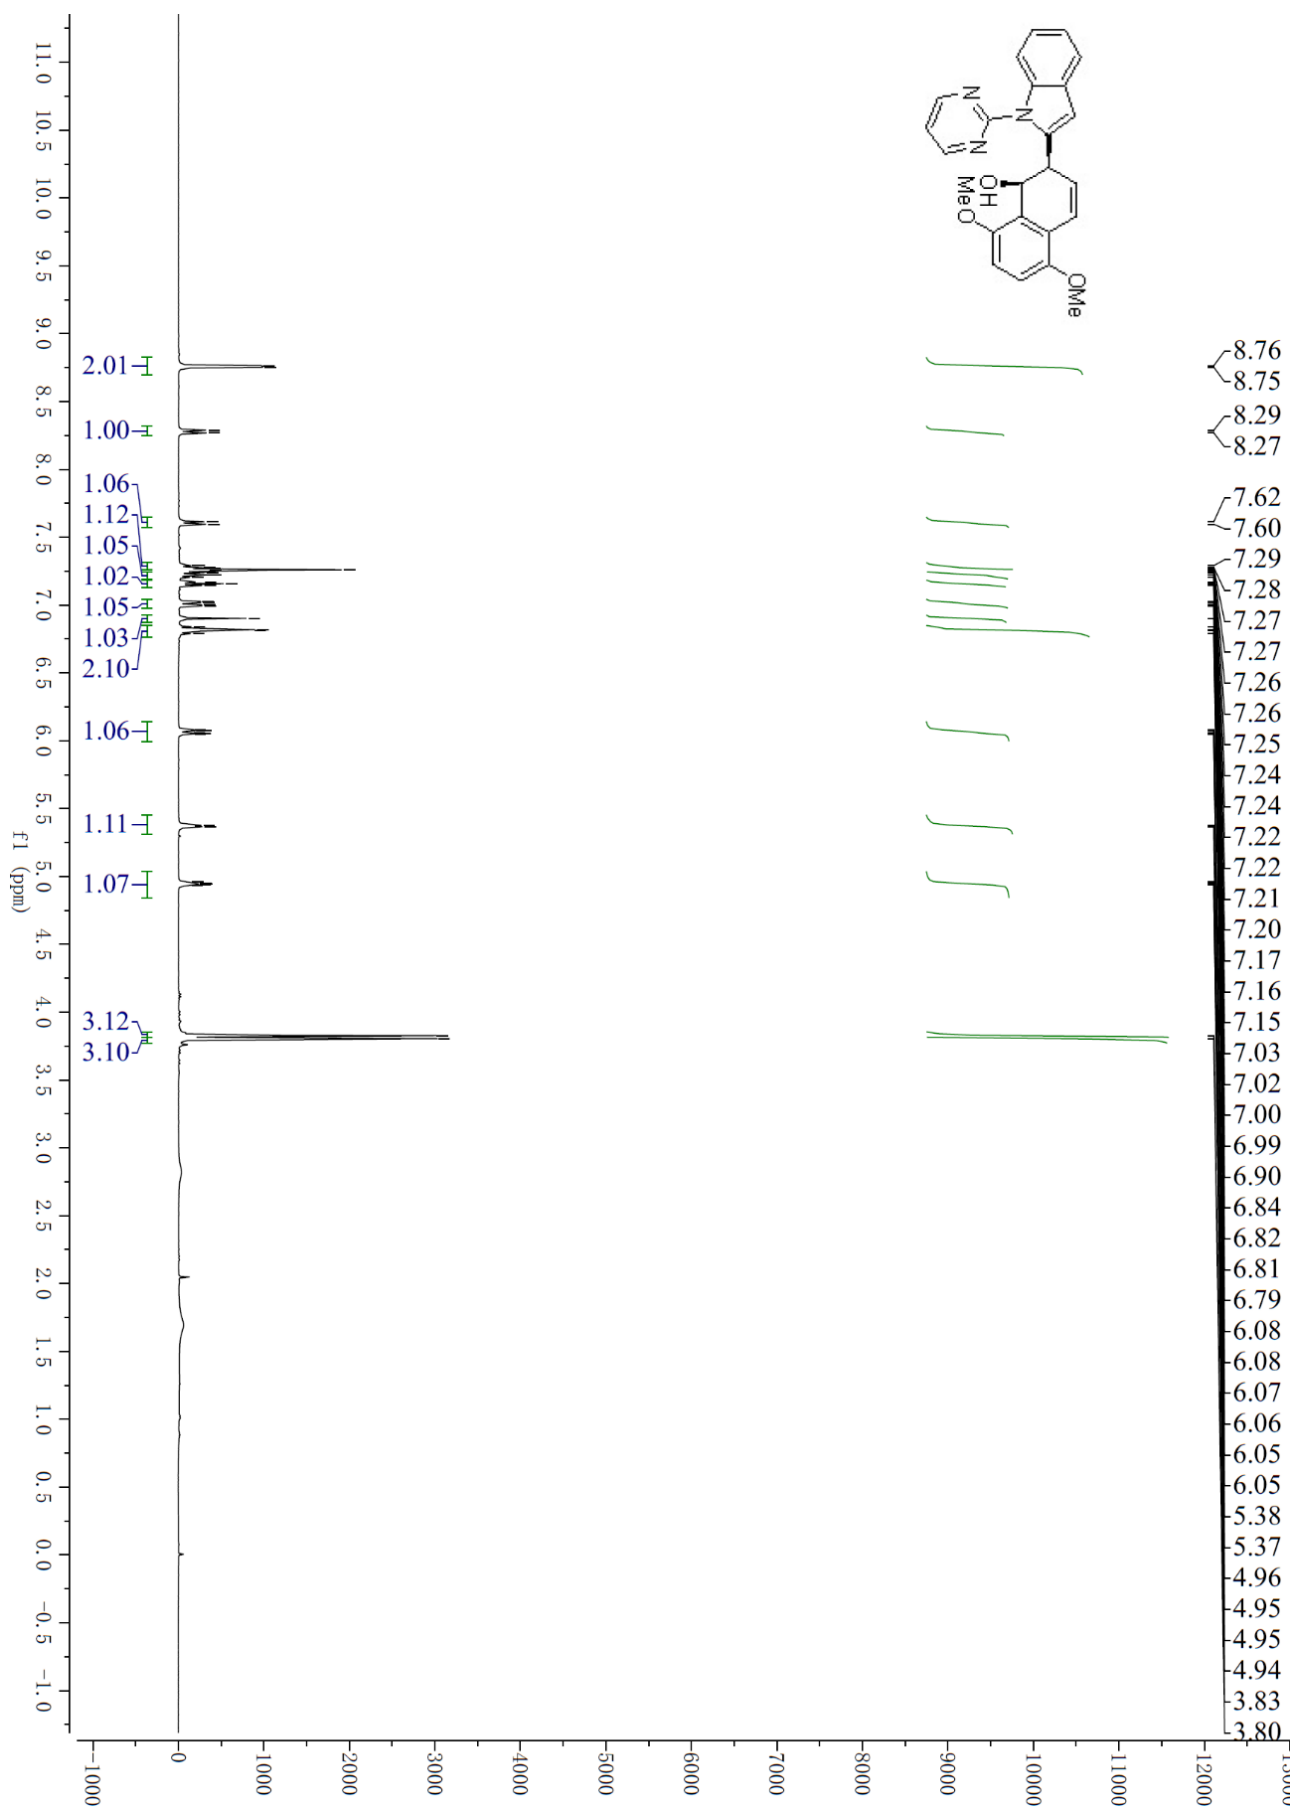

# SUPPLEMENTARY INFORMATION

**Supplementary Fig. 75**  $^{13}\text{C}$  NMR Spectrum of *cis*-3af

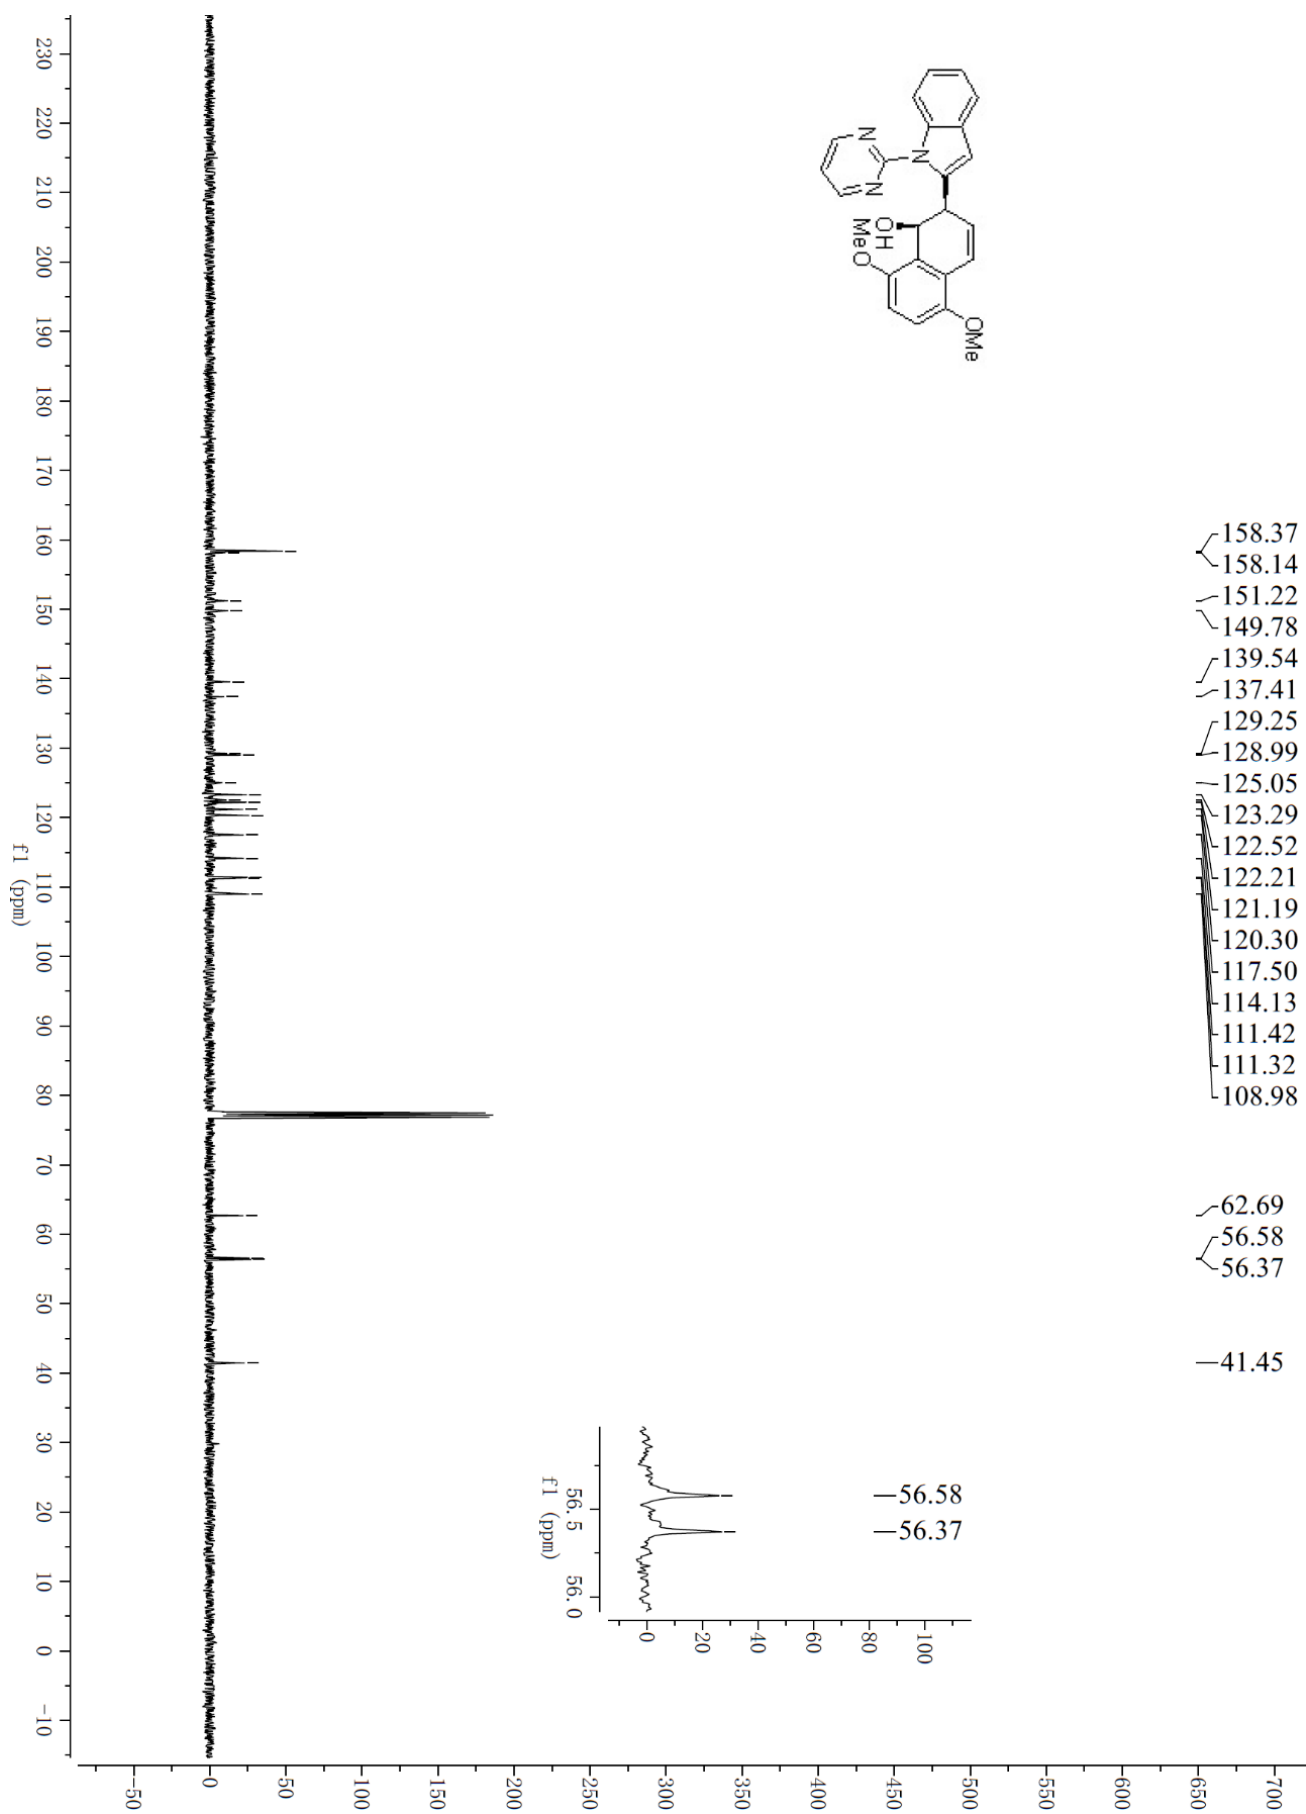

# SUPPLEMENTARY INFORMATION

**Supplementary Fig. 76**  $^1\text{H}$  NMR Spectrum of *cis*-3ag

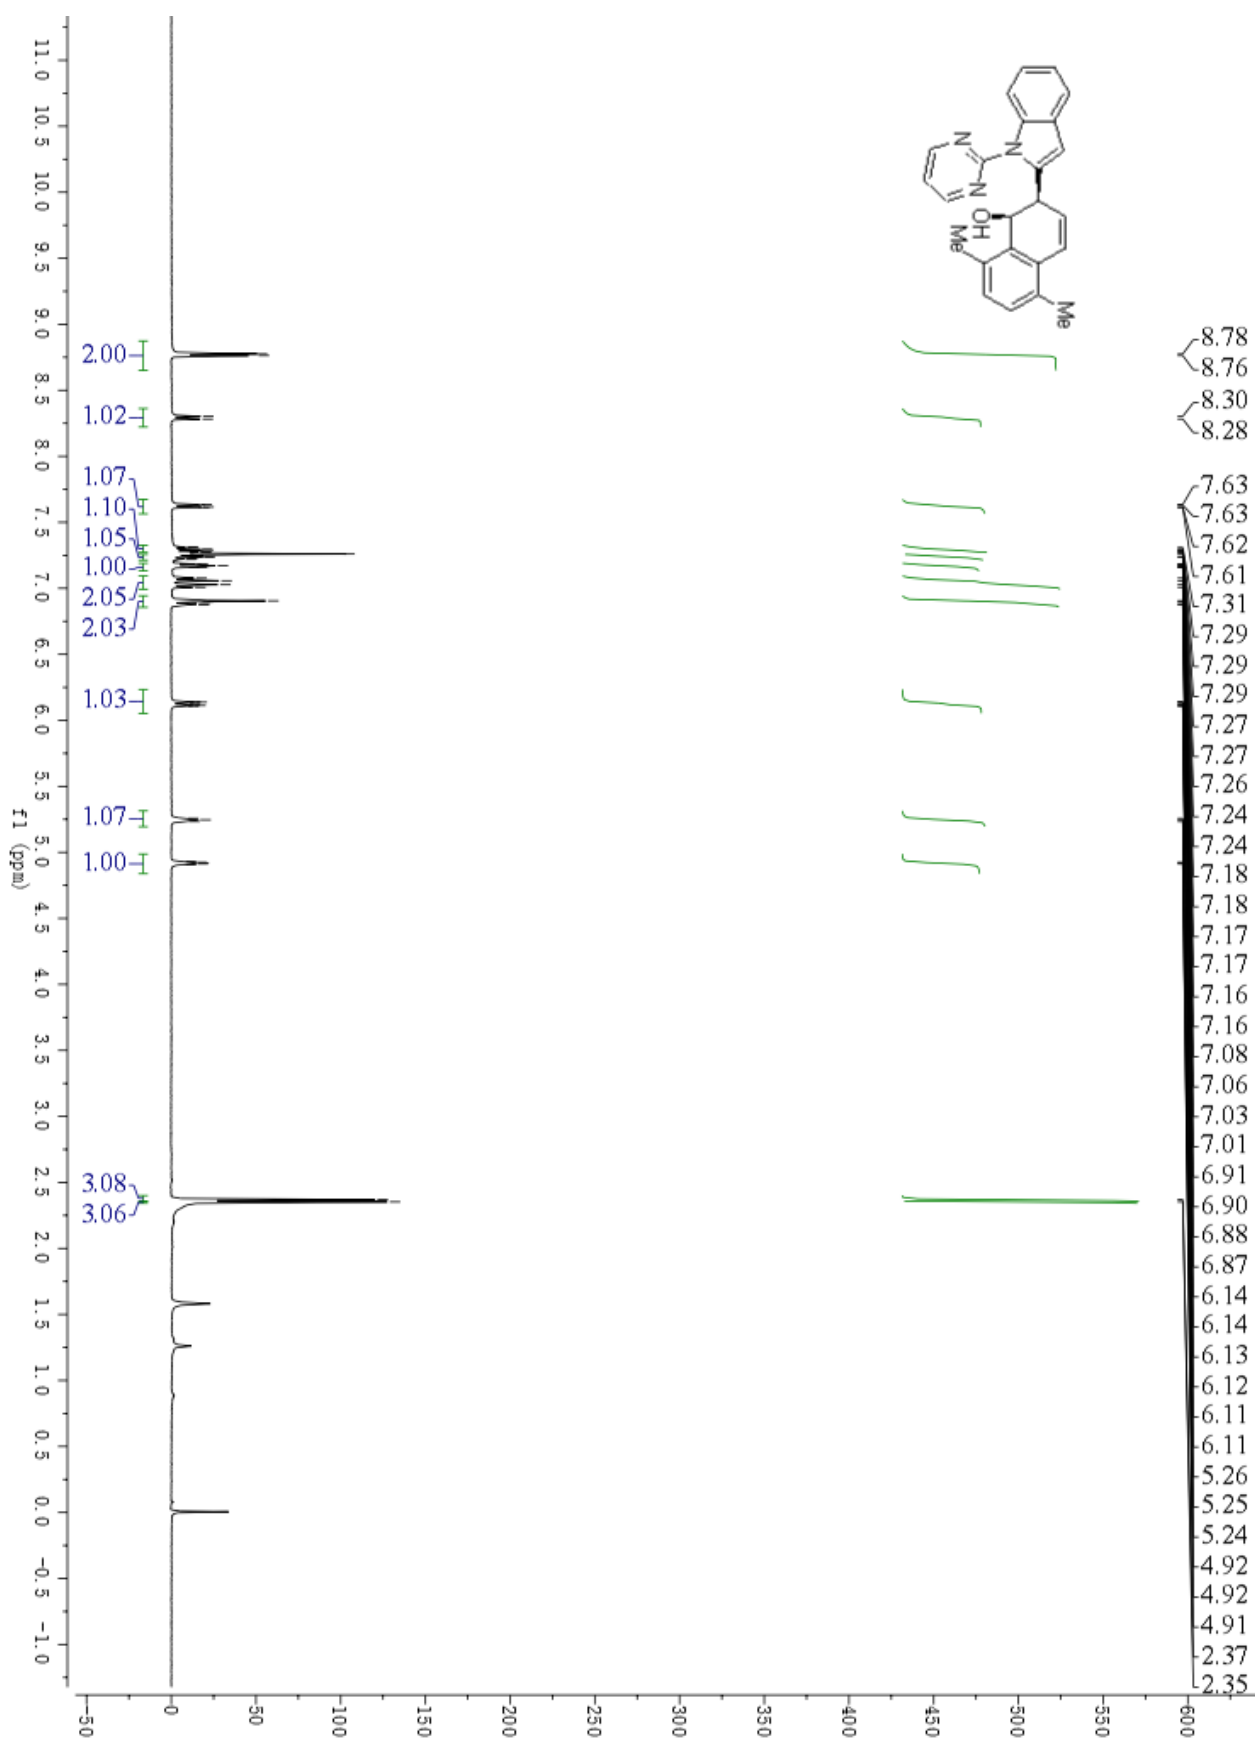

# SUPPLEMENTARY INFORMATION

Supplementary Fig. 77 <sup>13</sup>C NMR Spectrum of *cis*-3ag

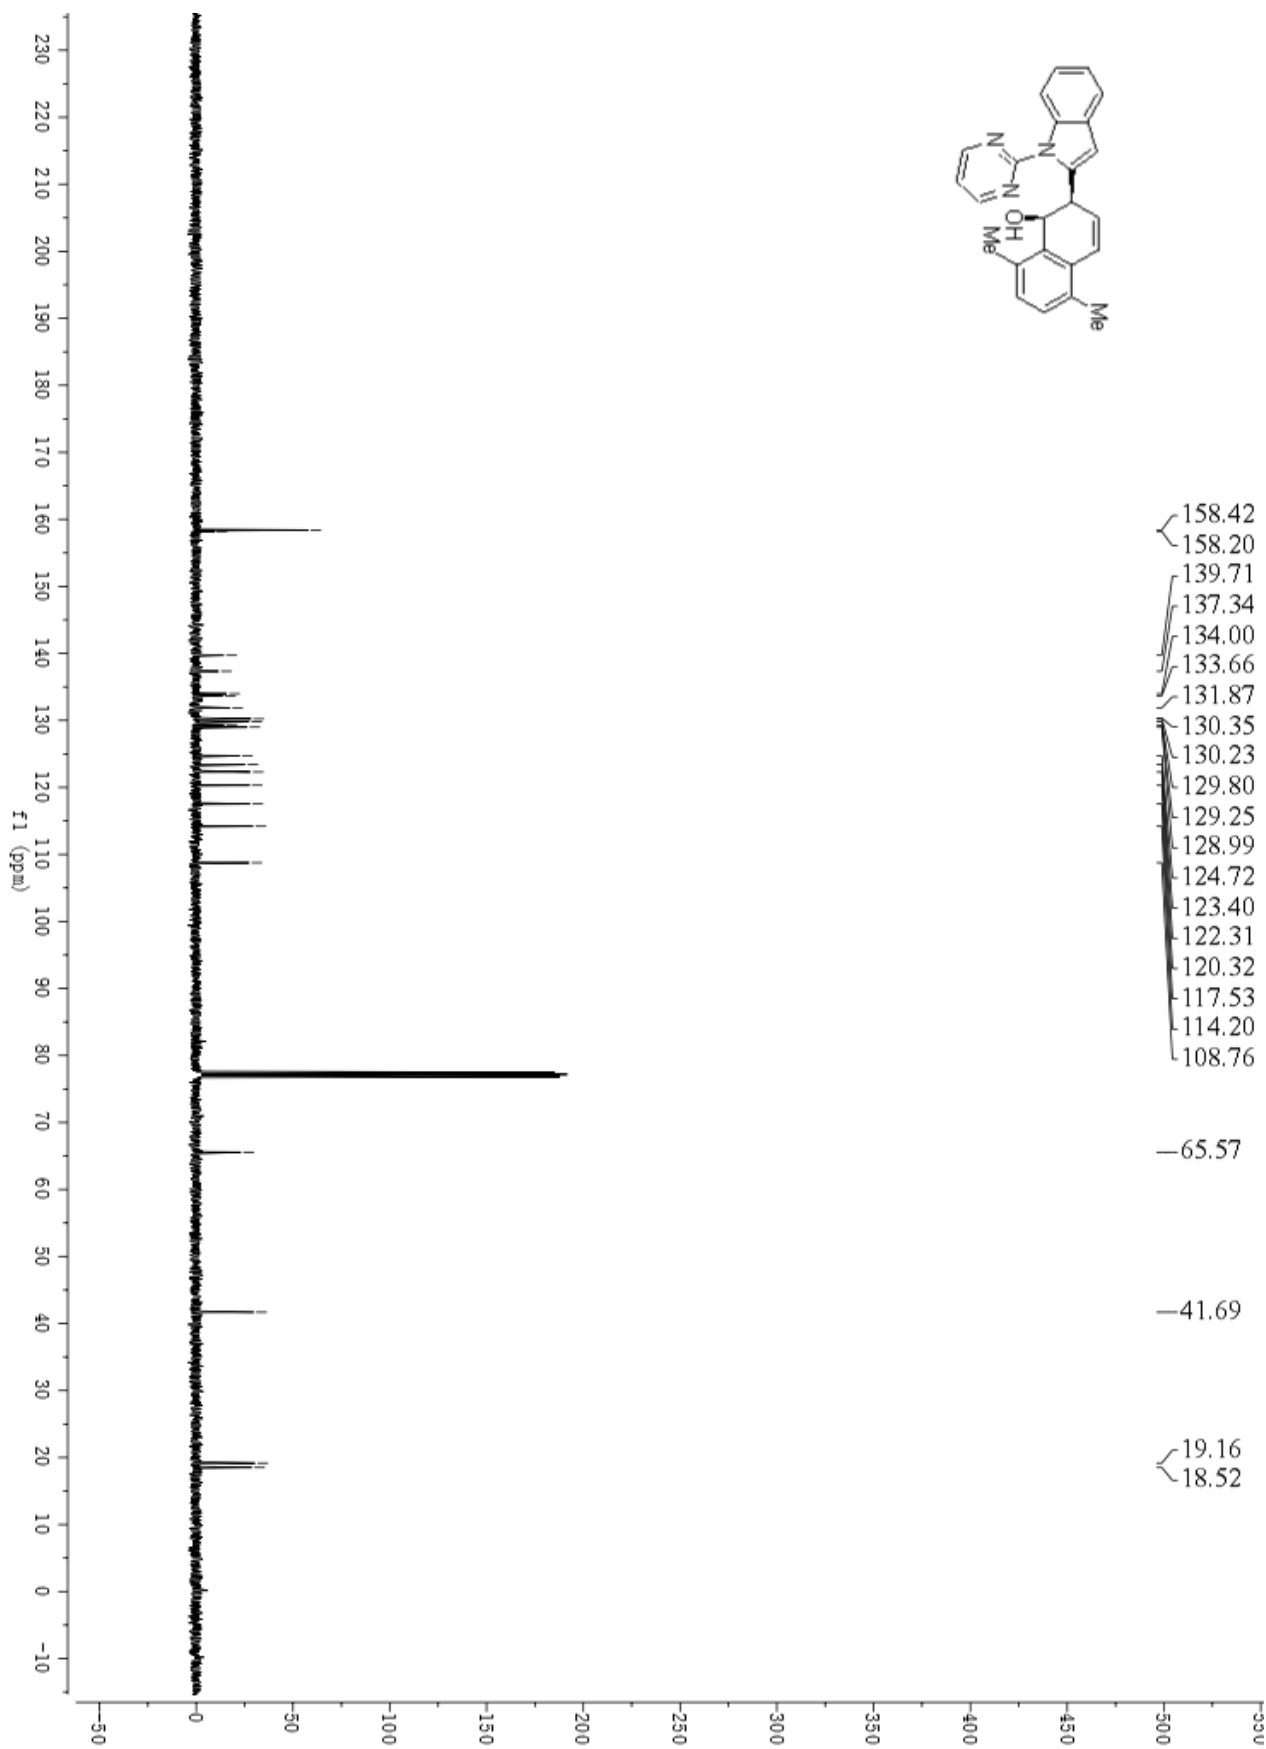



# SUPPLEMENTARY INFORMATION

**Supplementary Fig. 78**  $^1\text{H}$  NMR Spectrum of *cis*-3ah

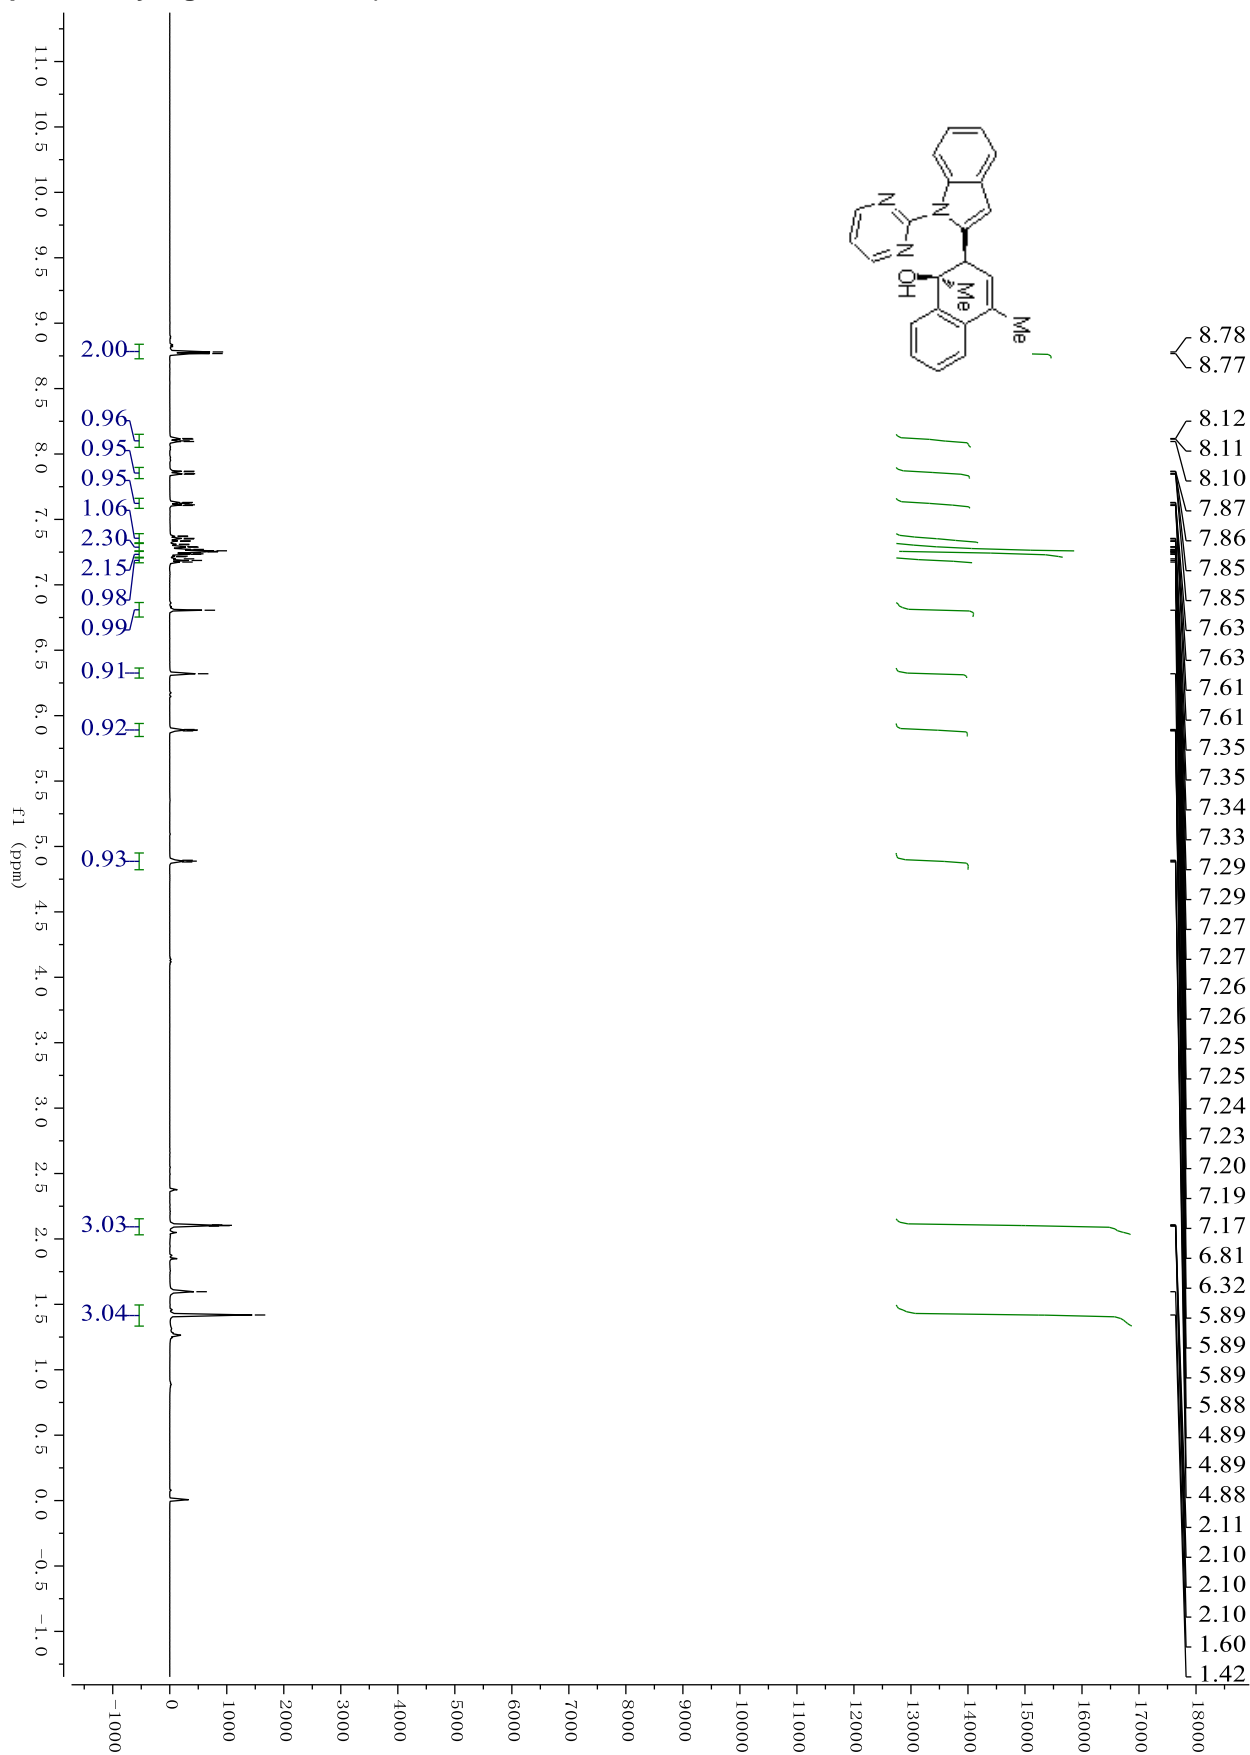

# SUPPLEMENTARY INFORMATION

**Supplementary Fig. 79**  $^{13}\text{C}$  NMR Spectrum of *cis*-3ah

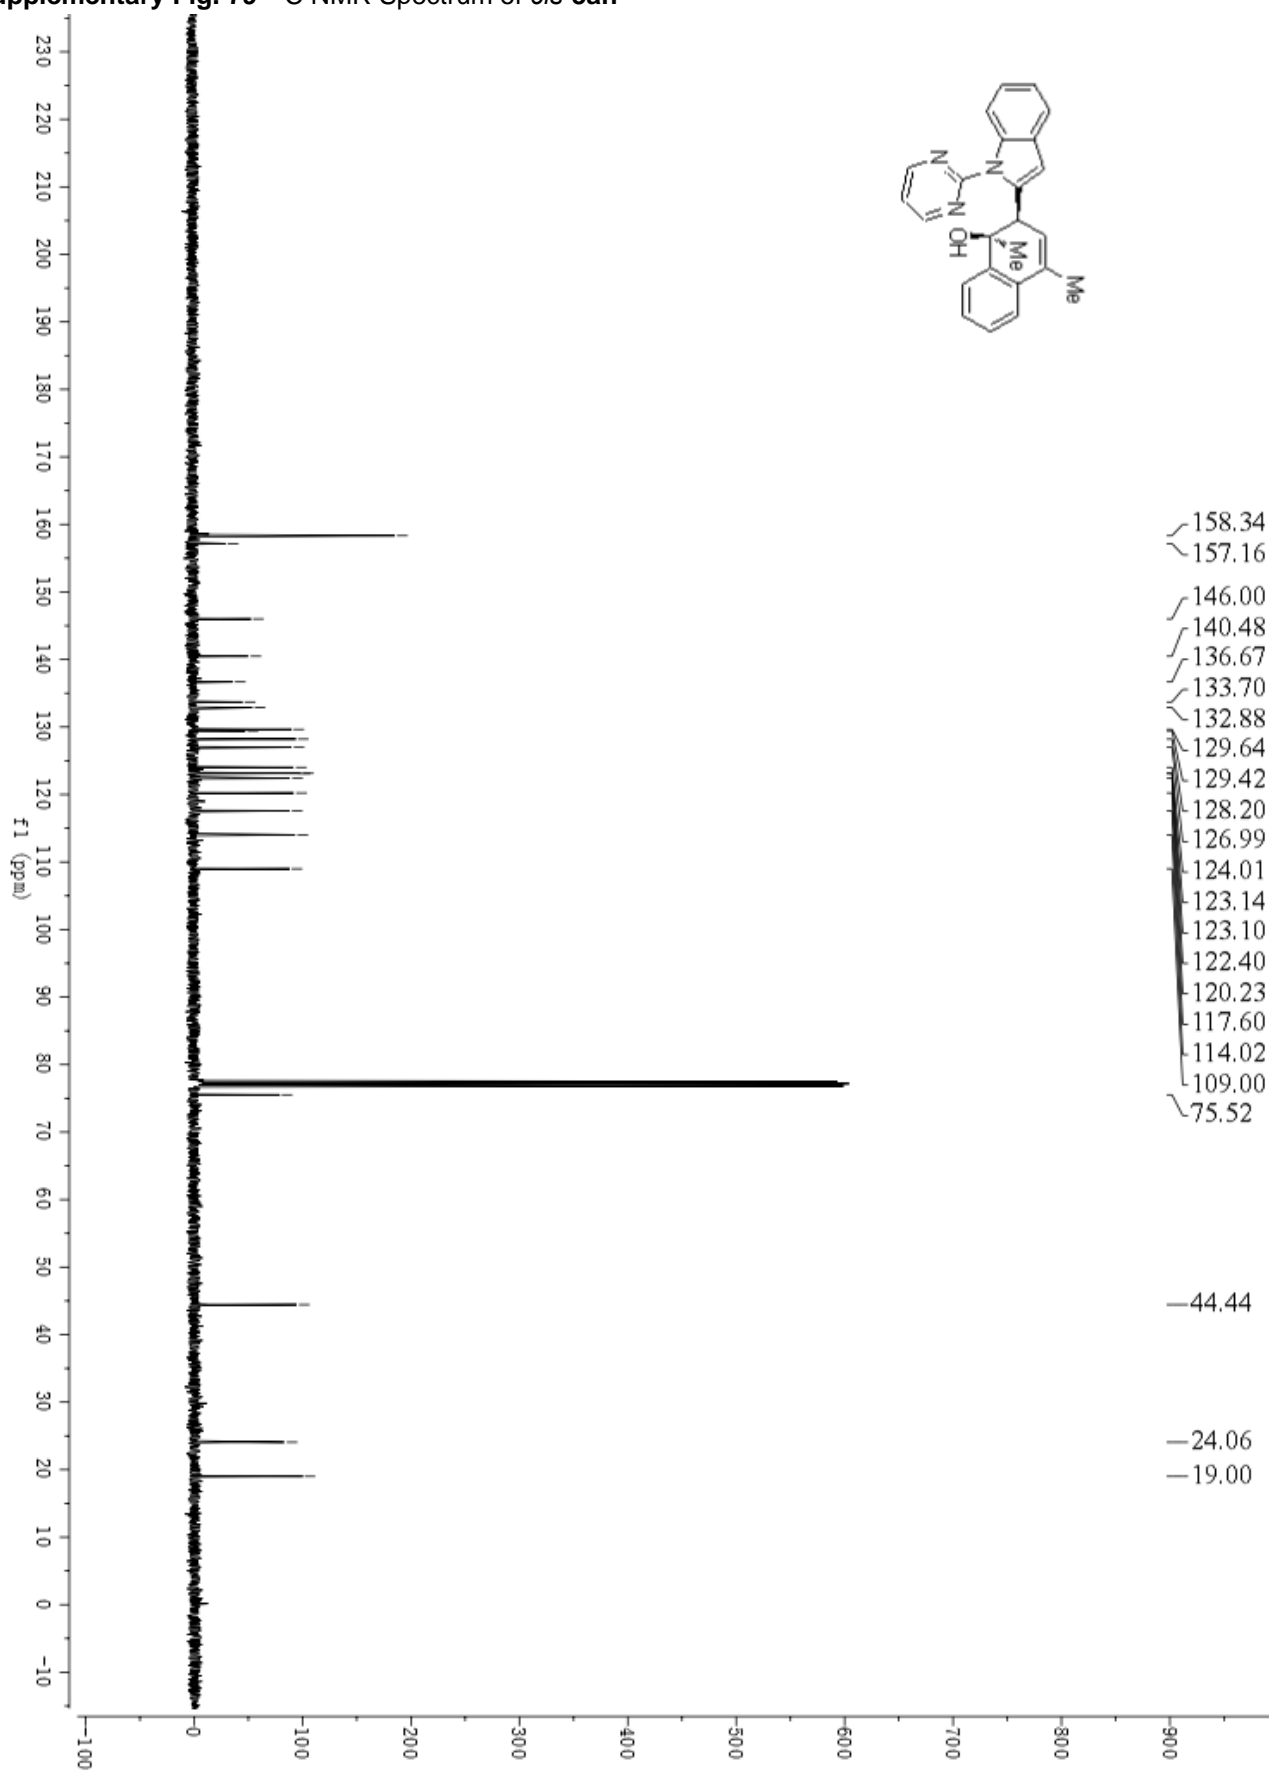

# SUPPLEMENTARY INFORMATION

**Supplementary Fig. 80**  $^1\text{H}$  NMR Spectrum of *cis*-3ai

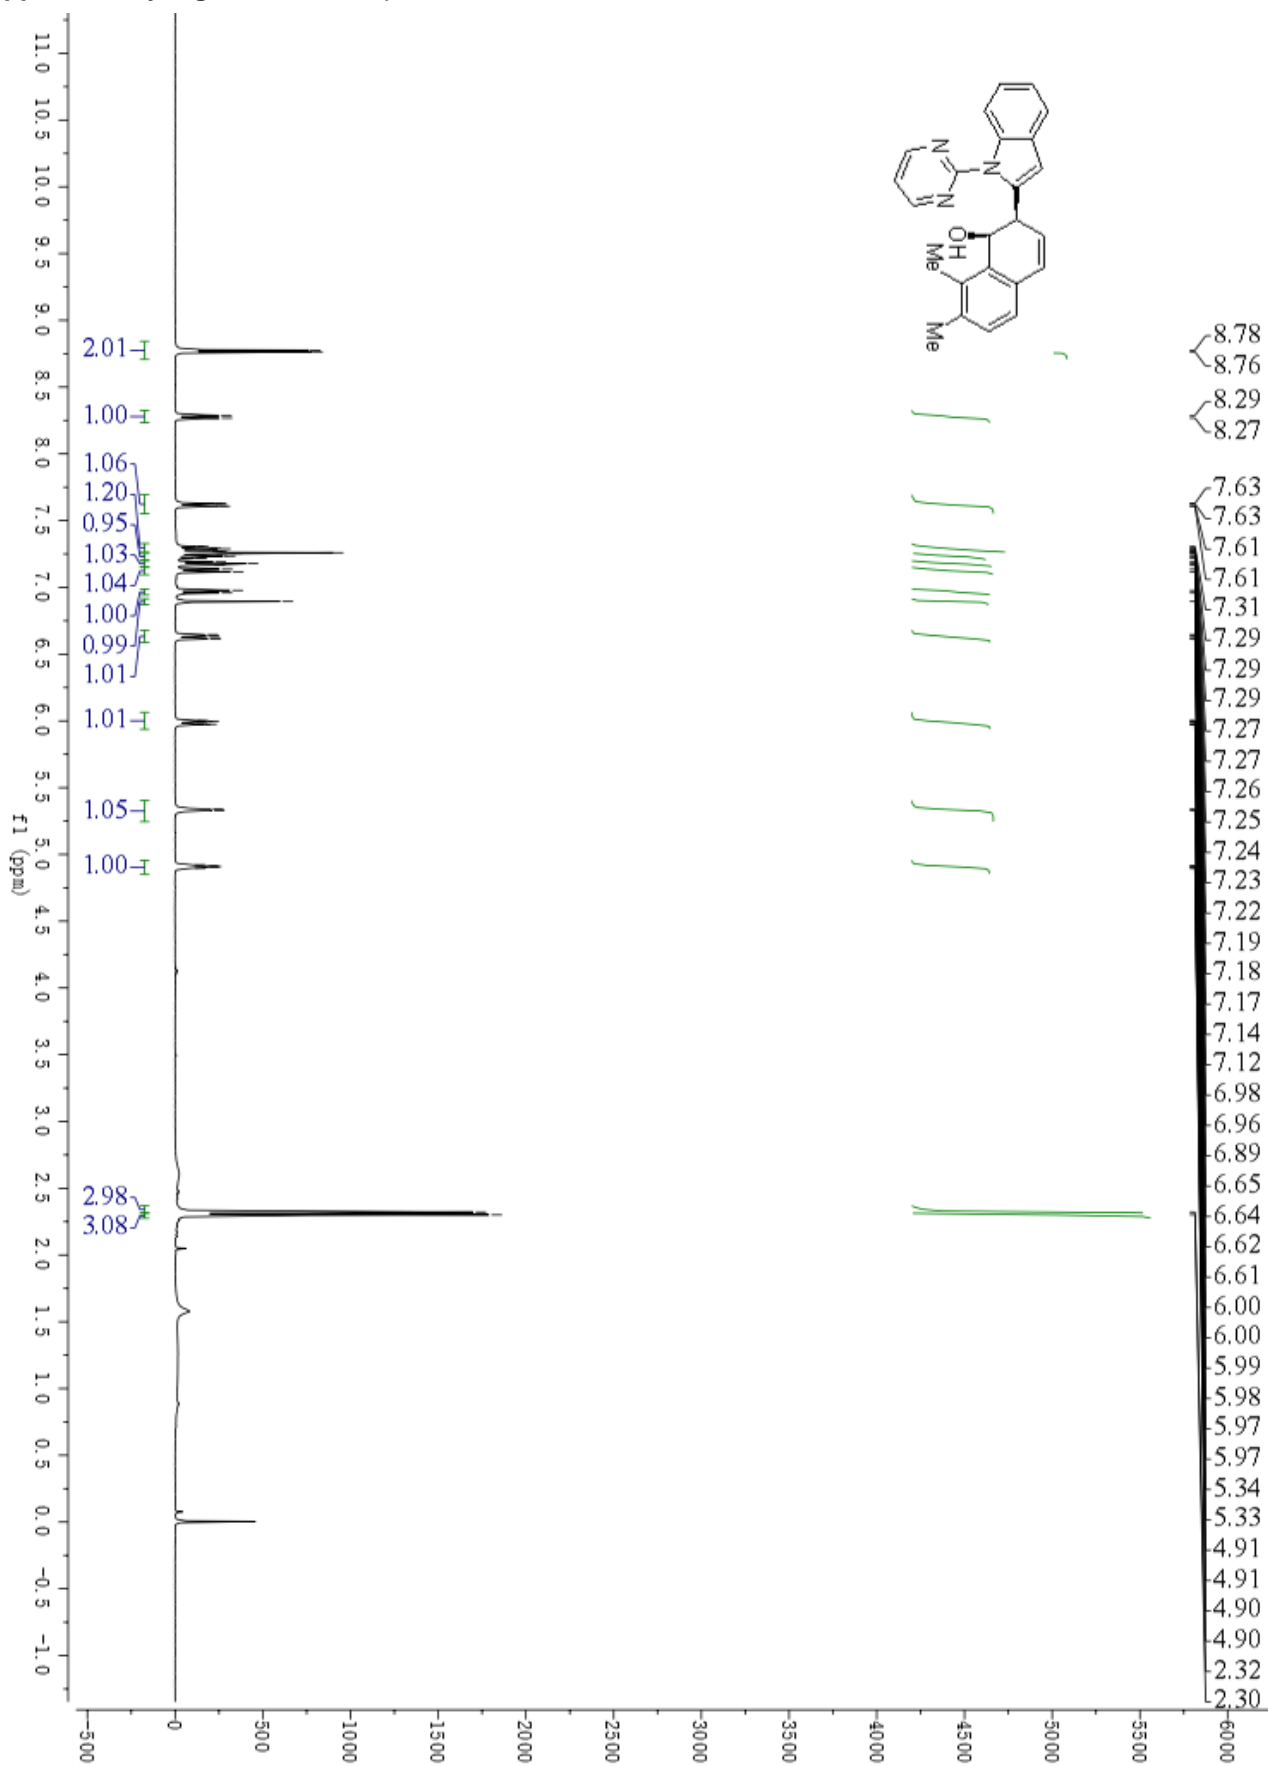

# SUPPLEMENTARY INFORMATION

**Supplementary Fig. 81**  $^{13}\text{C}$  NMR Spectrum of *cis*-3ai

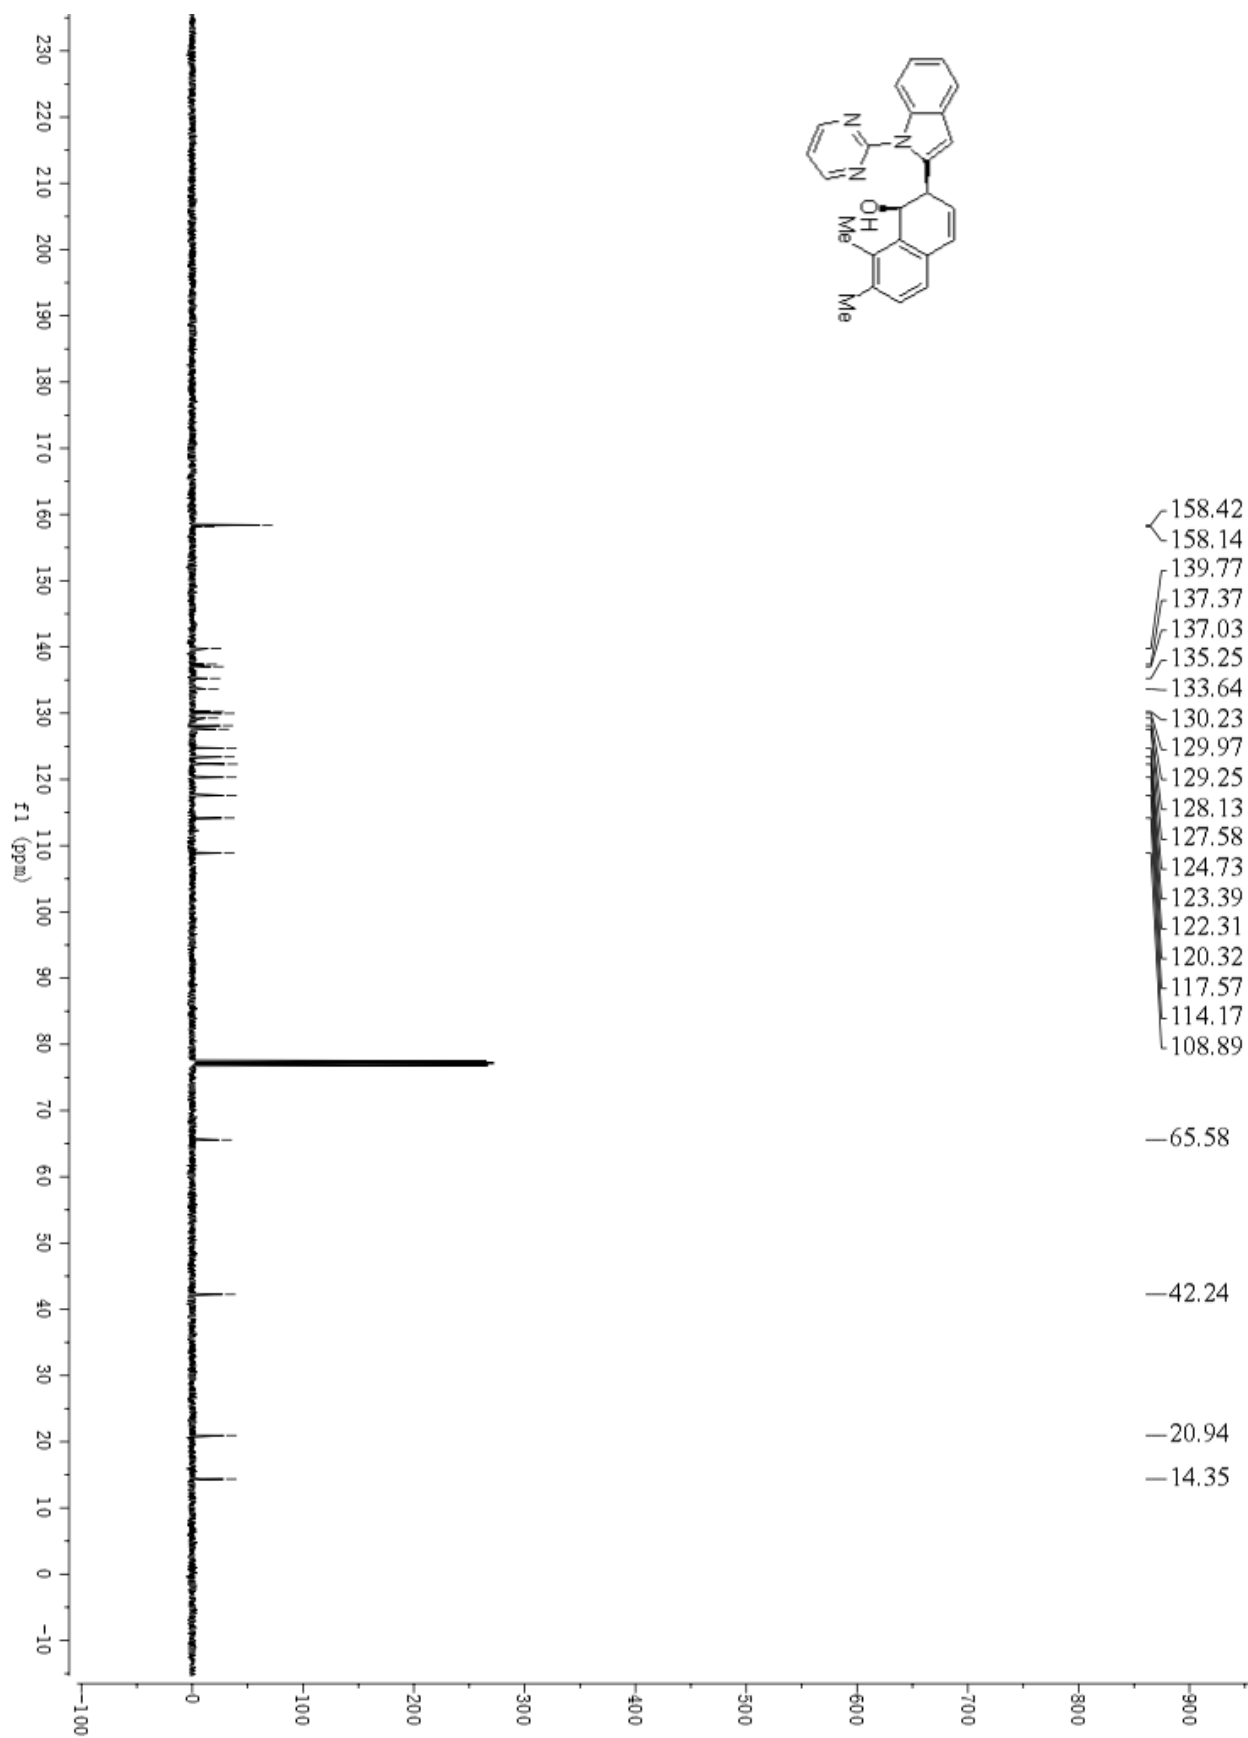

# SUPPLEMENTARY INFORMATION

**Supplementary Fig. 82** 1D-nosey NMR Spectra for *cis-3ai*

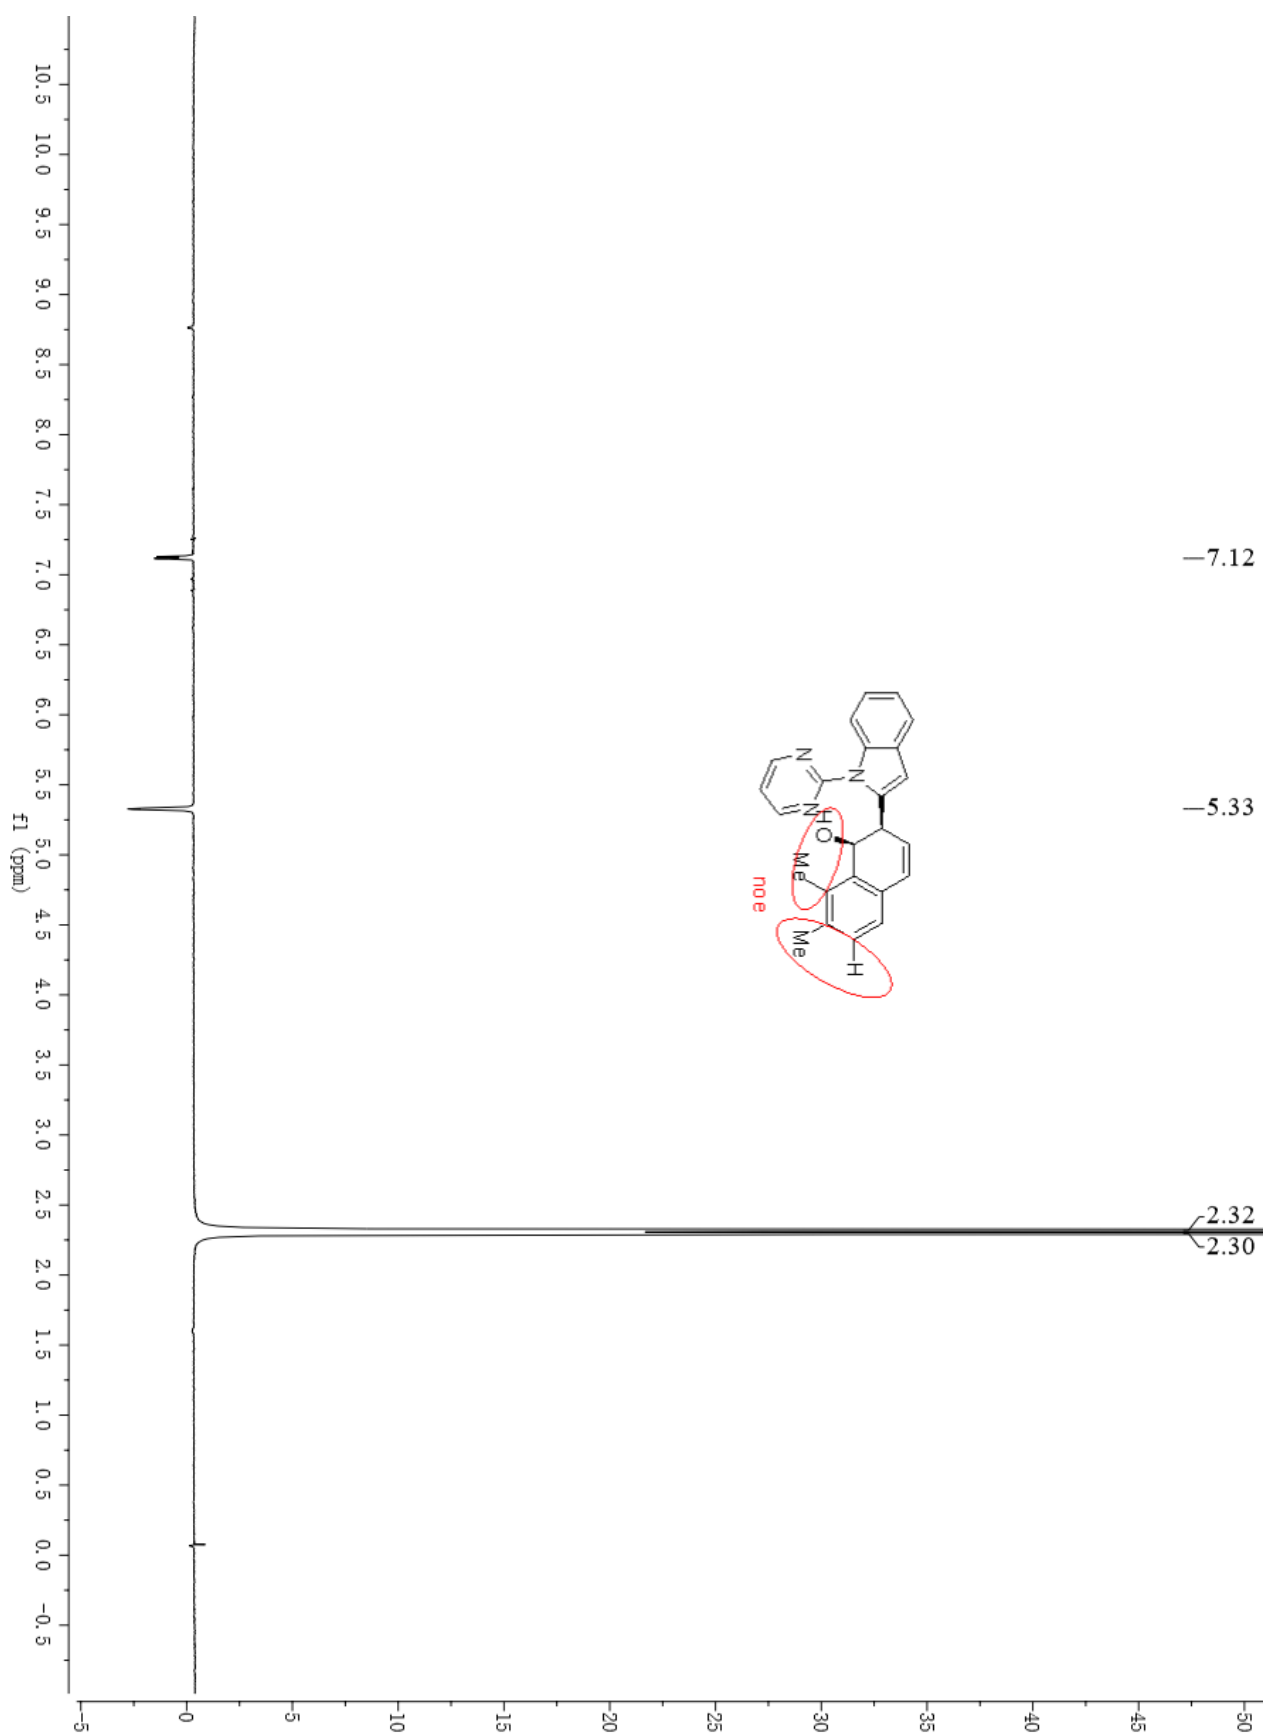

SUPPLEMENTARY INFORMATION

Supplementary Fig. 83 <sup>1</sup>H NMR Spectrum of *cis*-3ai'

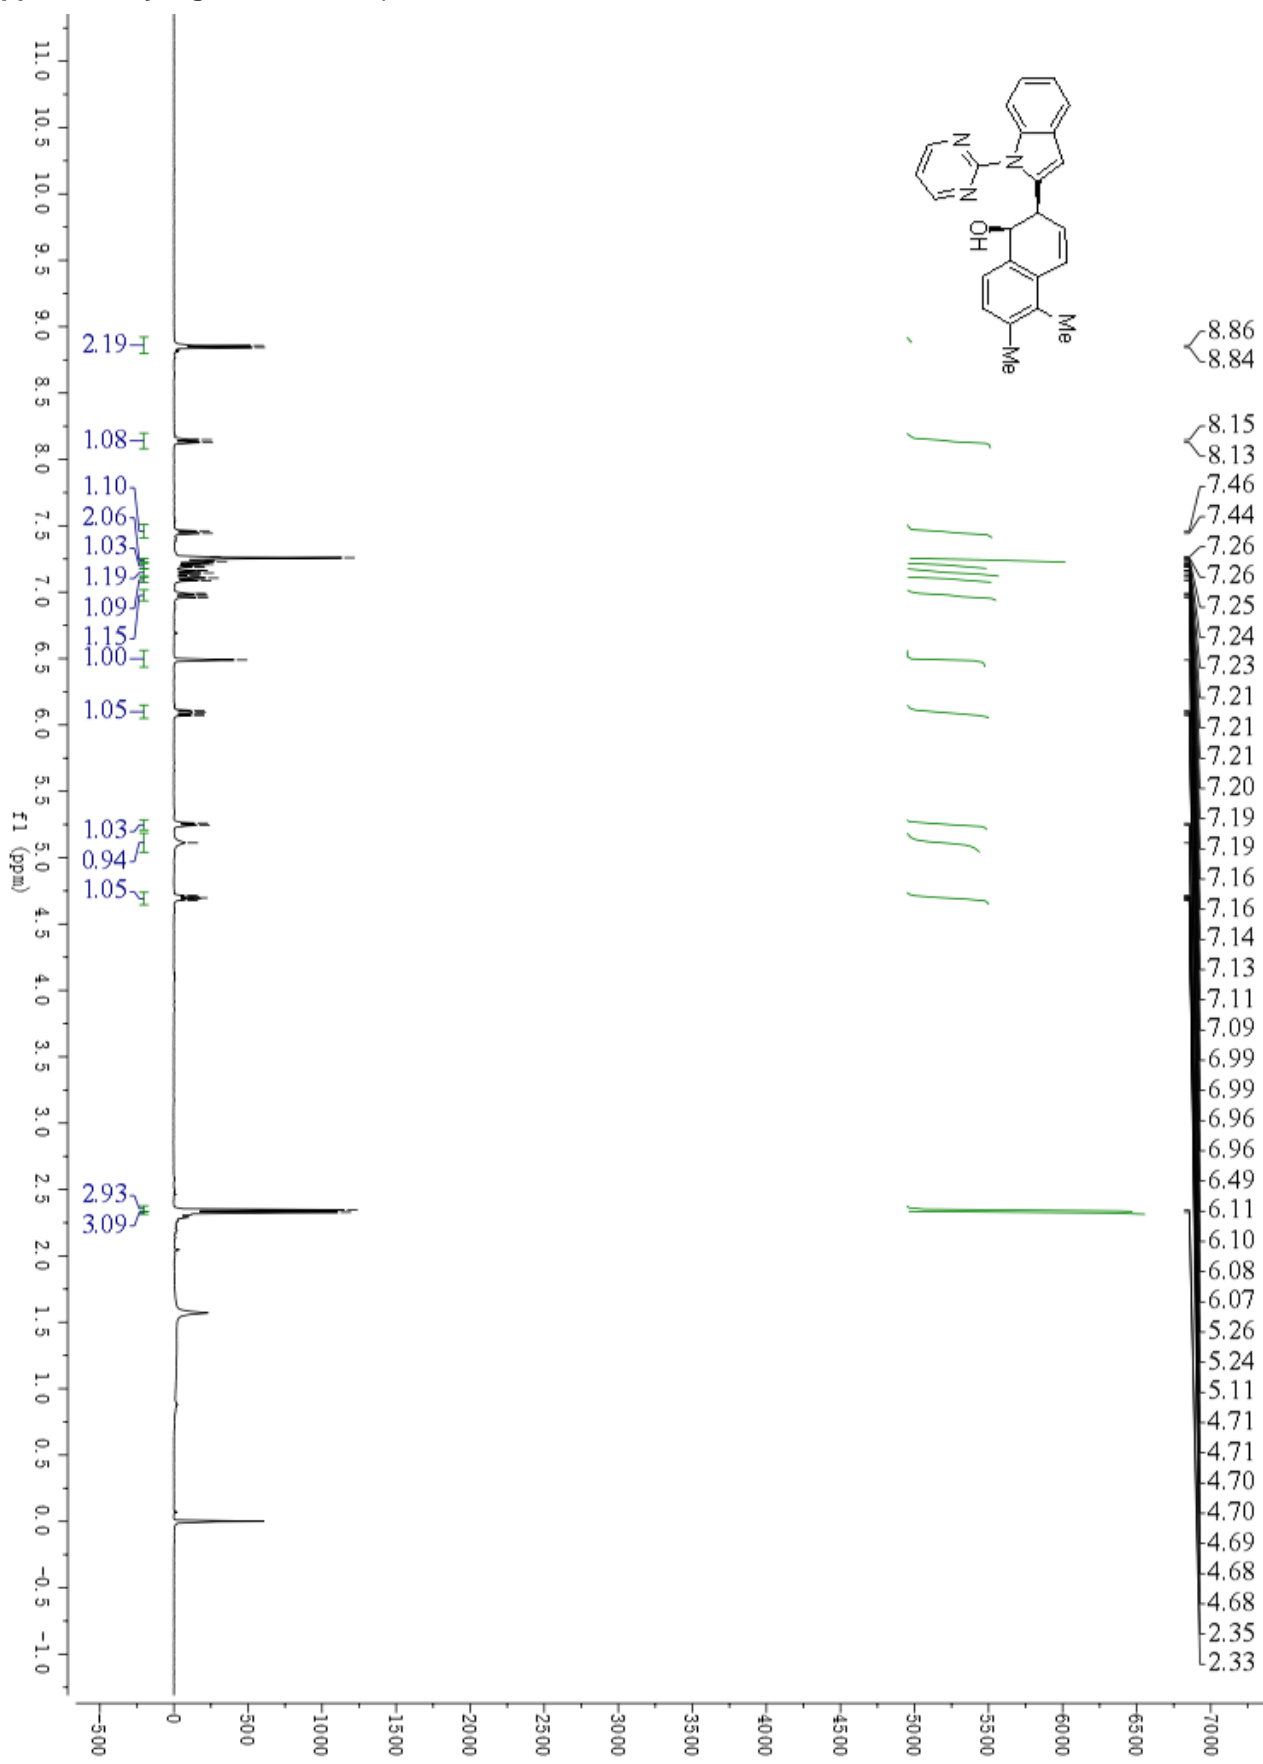

# SUPPLEMENTARY INFORMATION

**Supplementary Fig. 84**  $^{13}\text{C}$  NMR Spectrum of *cis-3ai'*

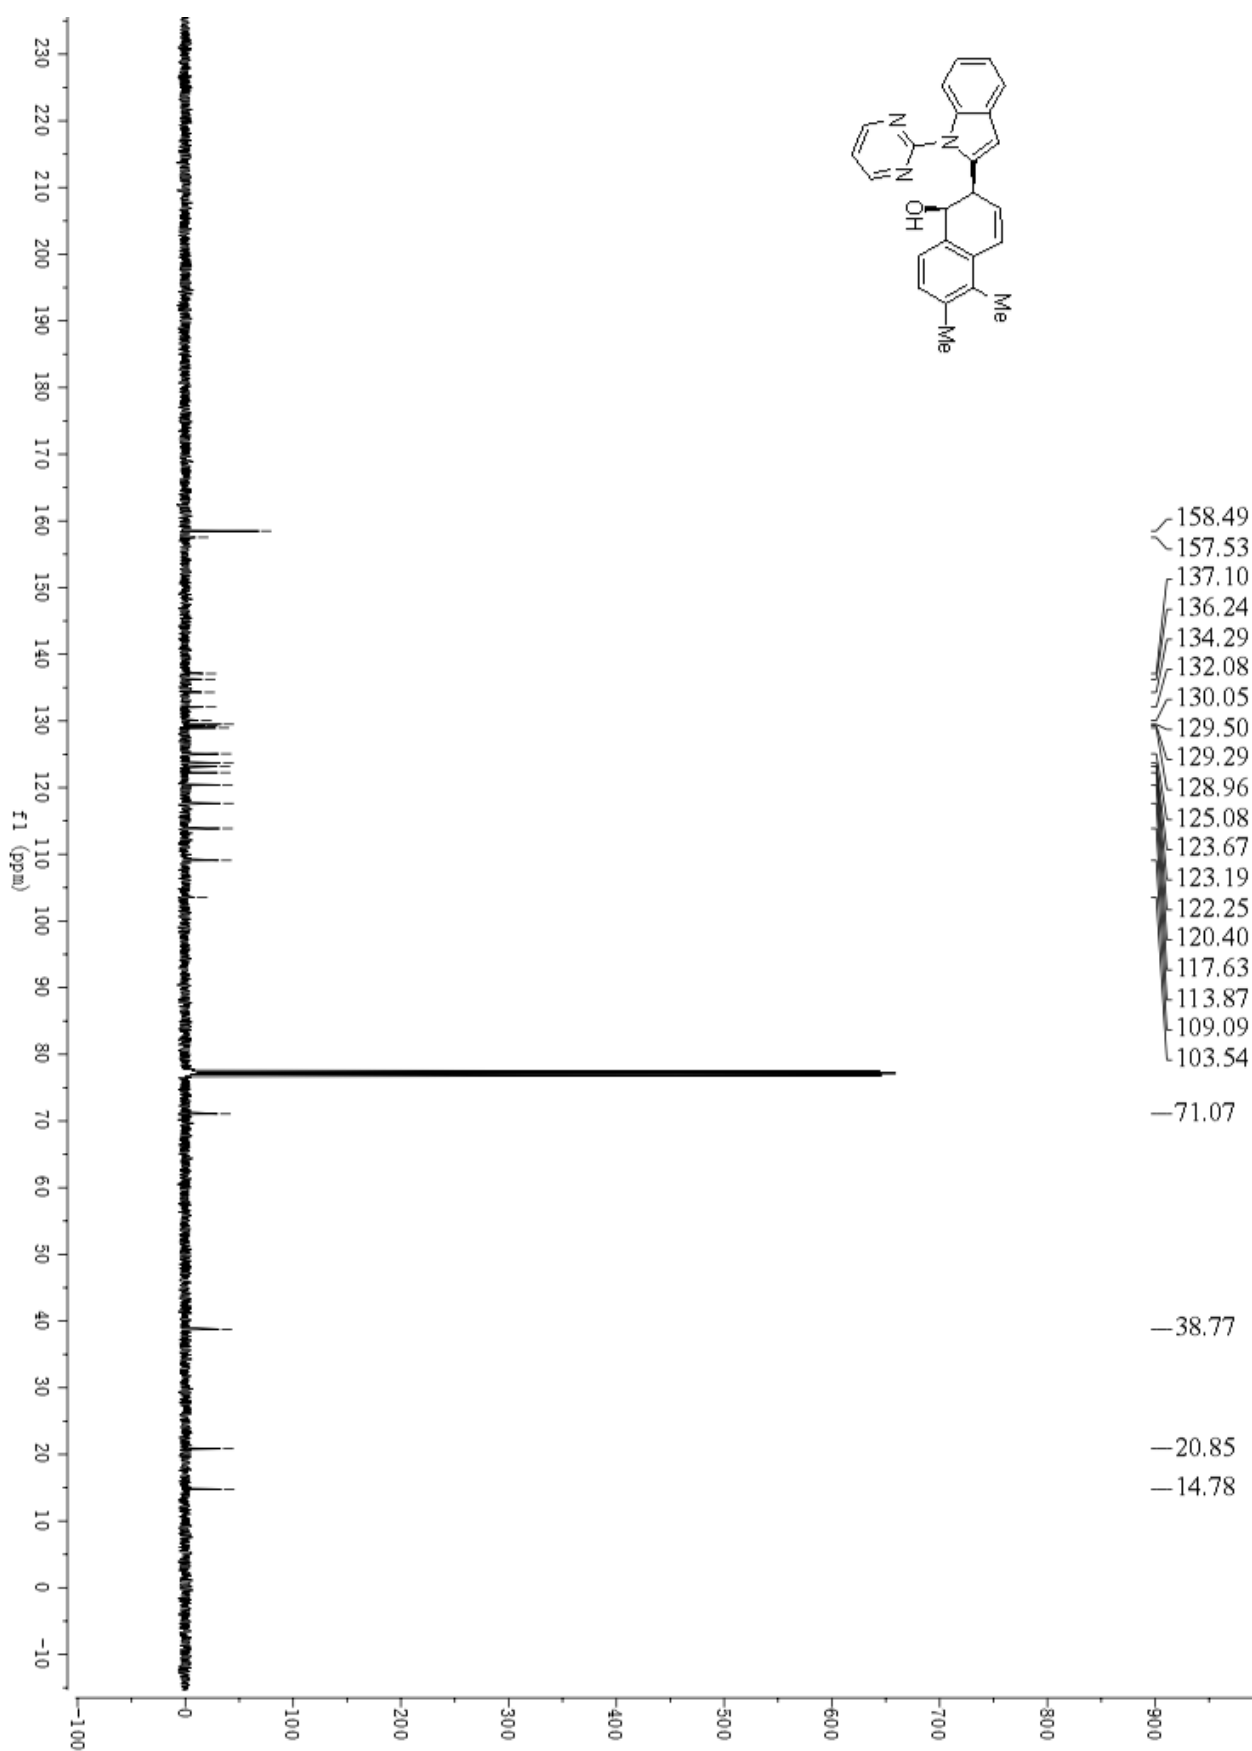

# SUPPLEMENTRAY INFORMATION

**Supplementary Fig. 85** 1D-nosey NMR Spectra for *cis-3ai'*

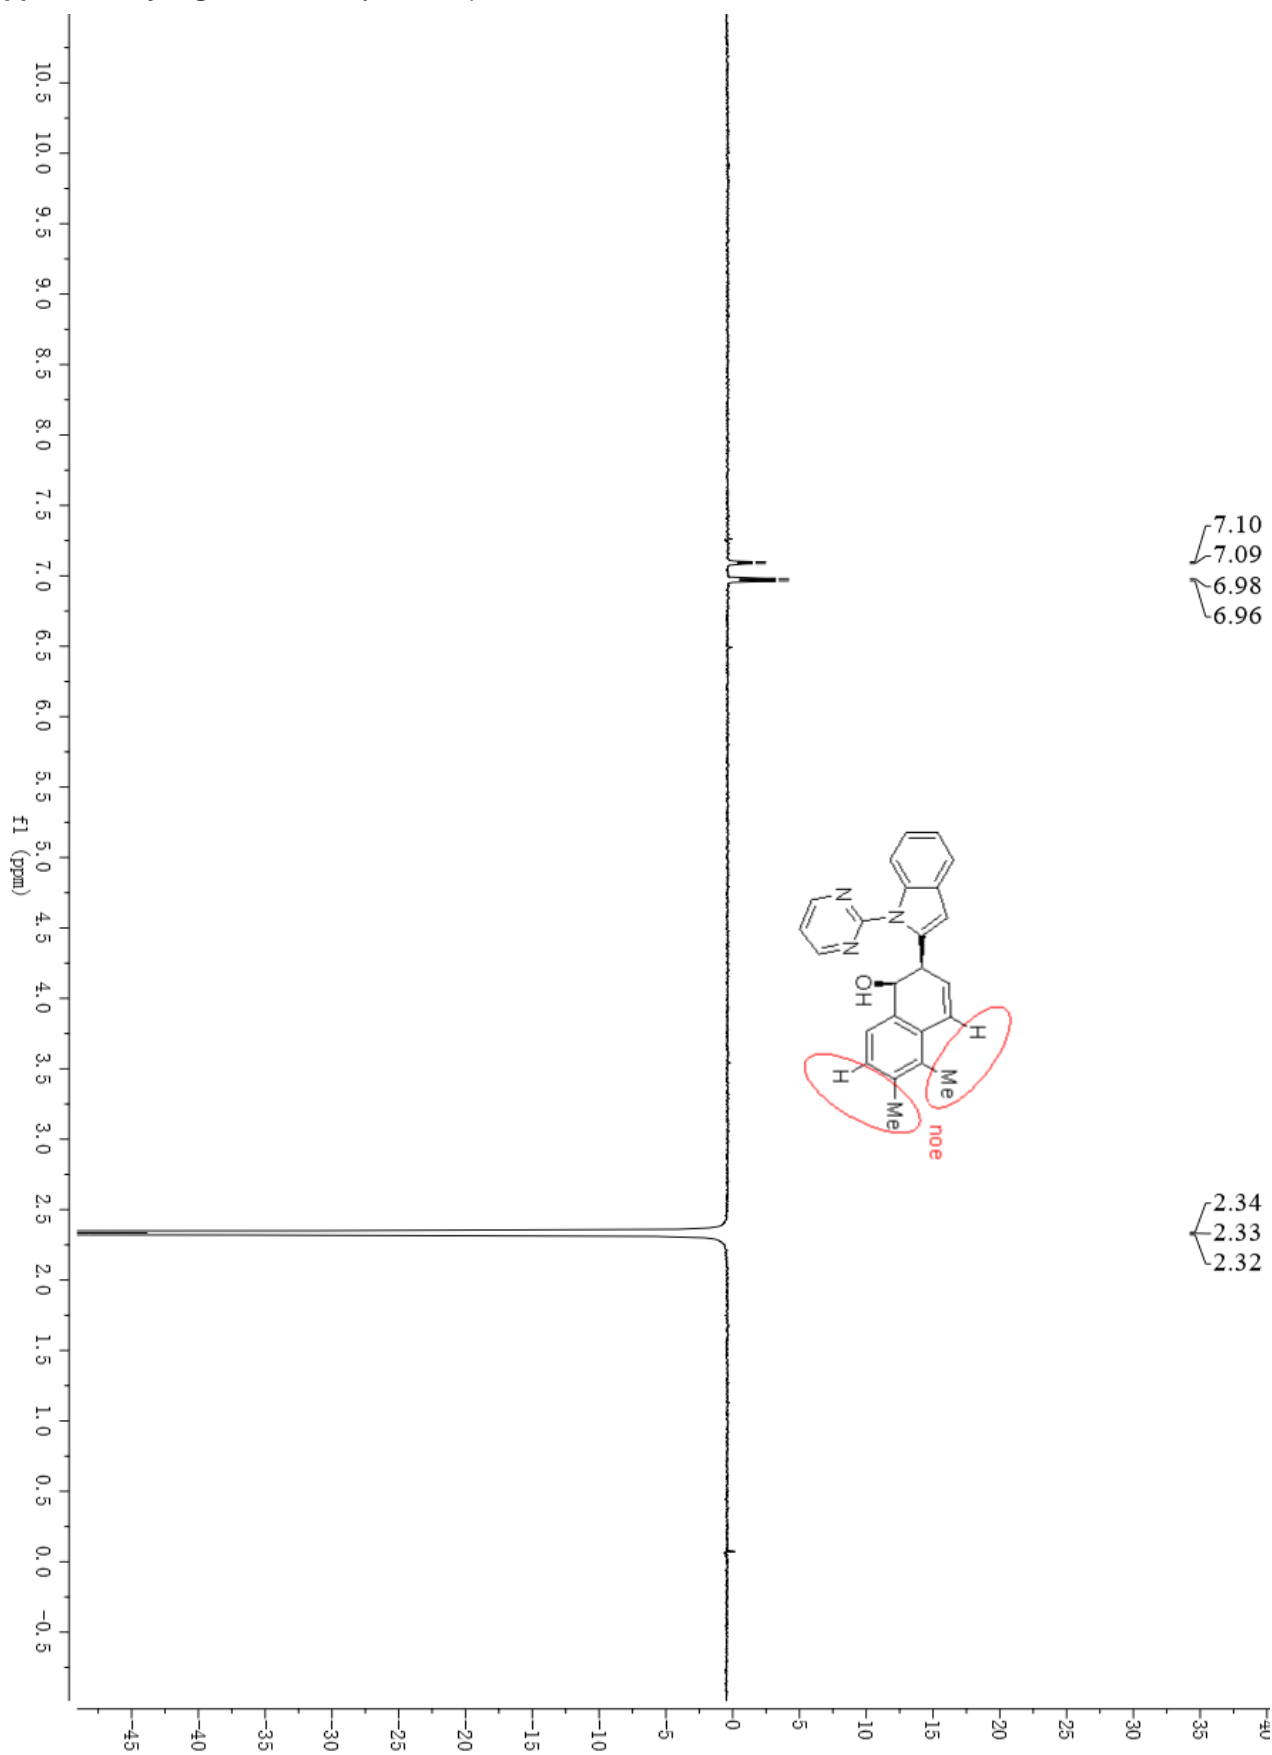



# SUPPLEMENTARY INFORMATION

**Supplementary Fig. 86**  $^1\text{H}$  NMR Spectrum of *cis*-7aa

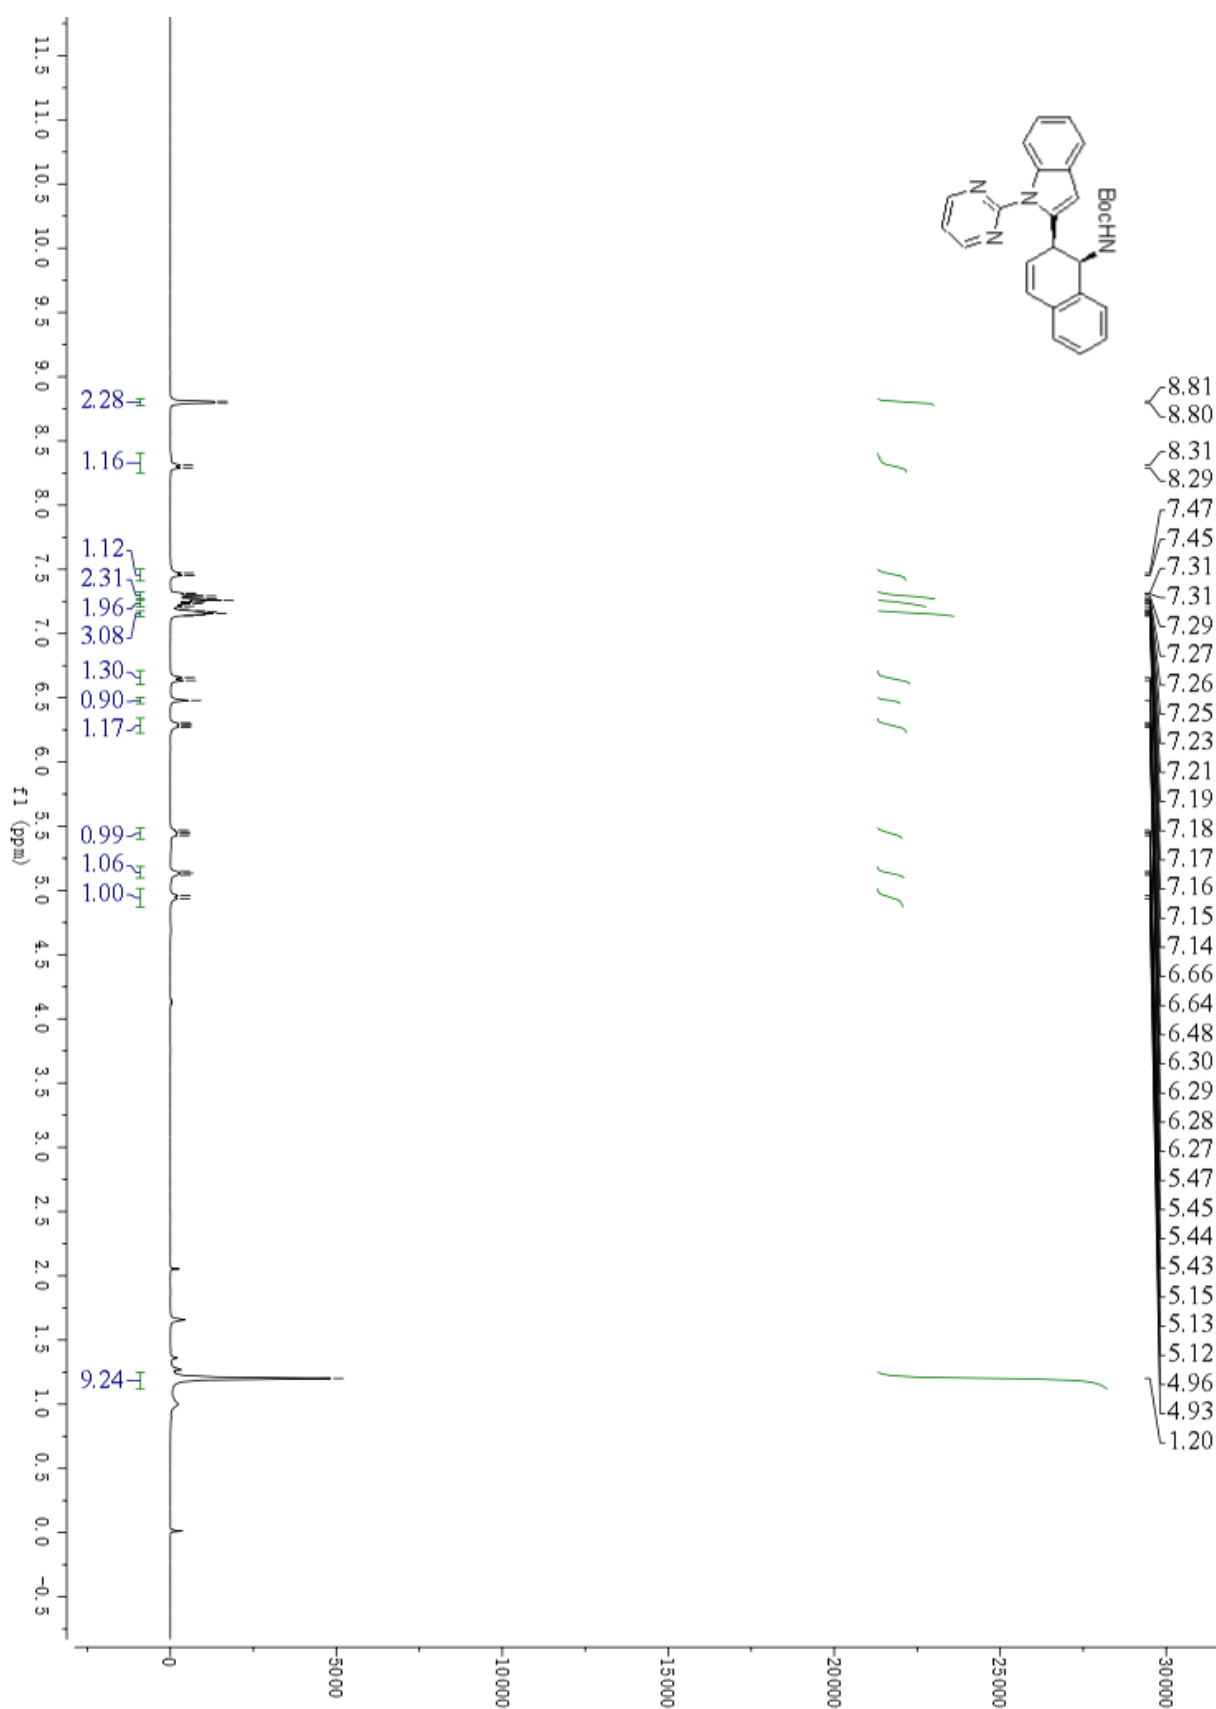

# SUPPLEMENTARY INFORMATION

Supplementary Fig. 87 <sup>13</sup>C NMR Spectrum of *cis*-7aa

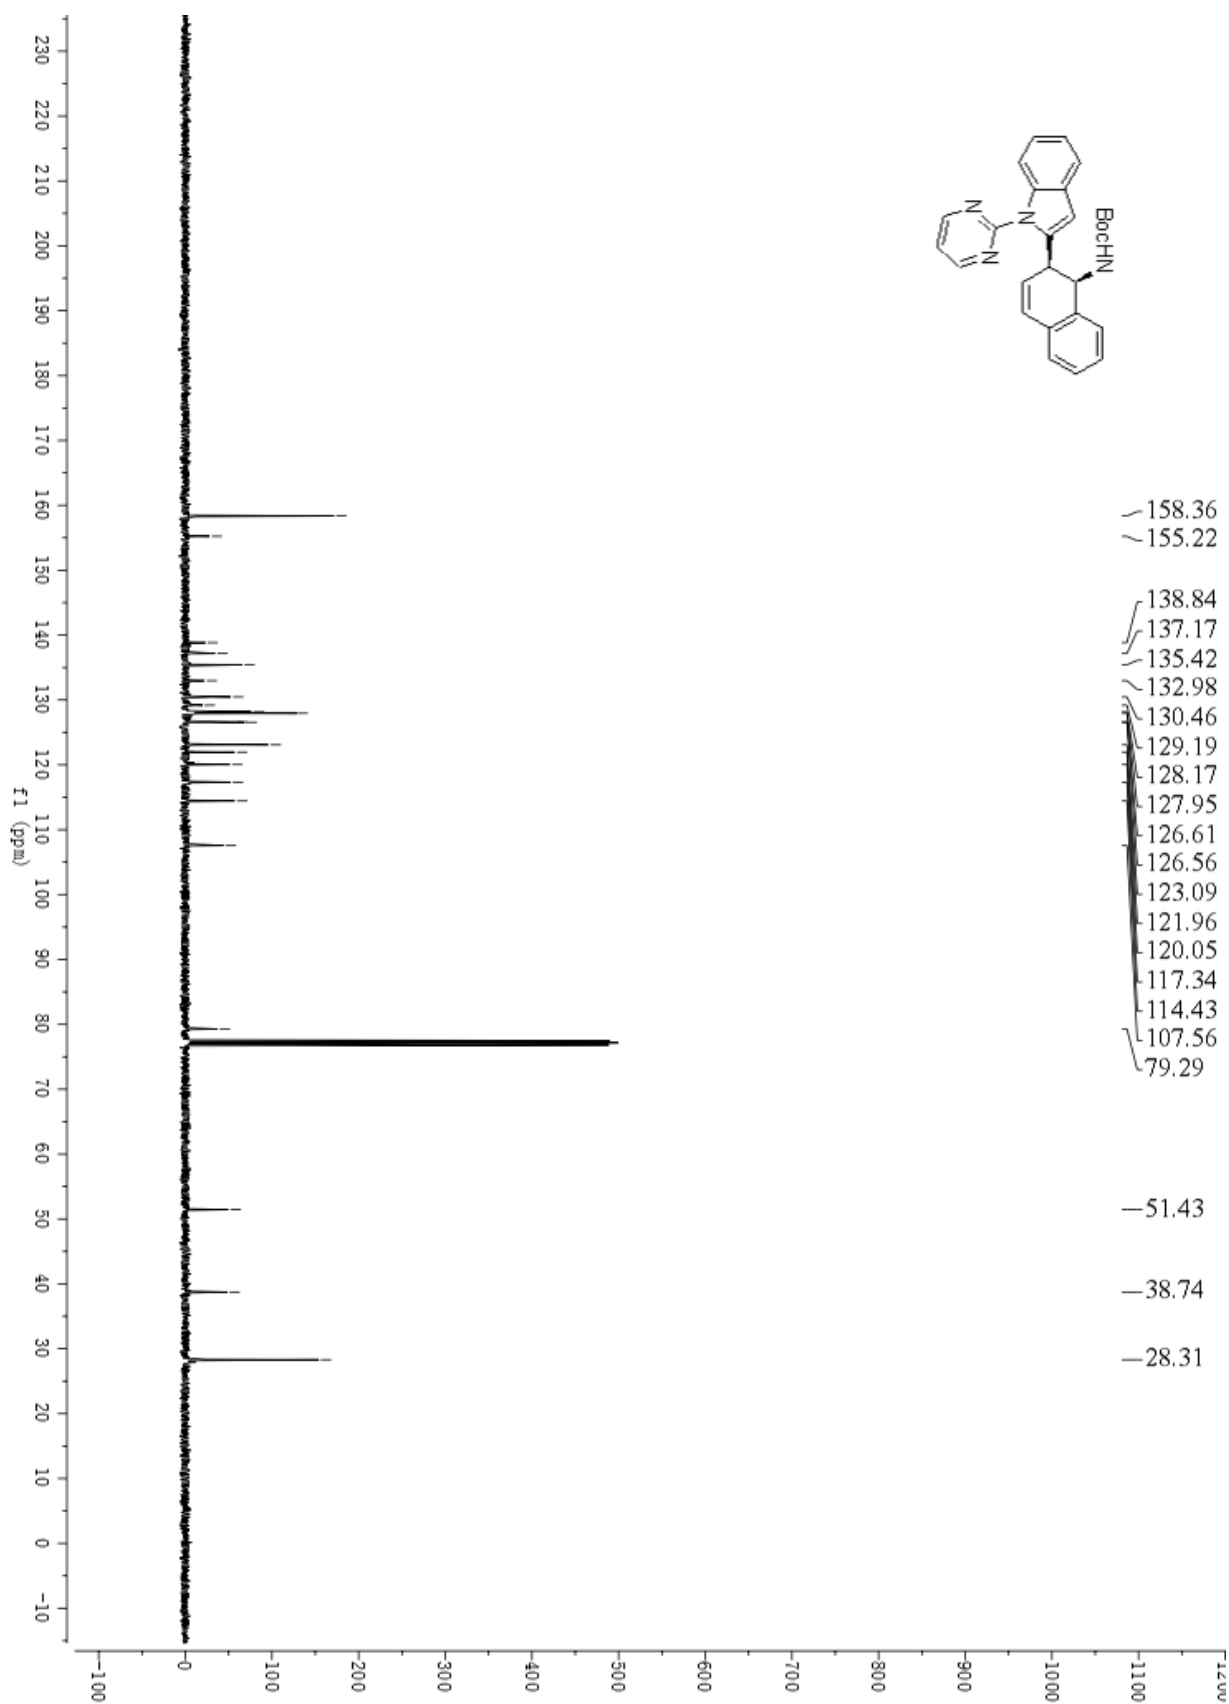

# SUPPLEMENTARY INFORMATION

**Supplementary Fig. 88**  $^1\text{H}$  NMR Spectrum of *cis*-7ab

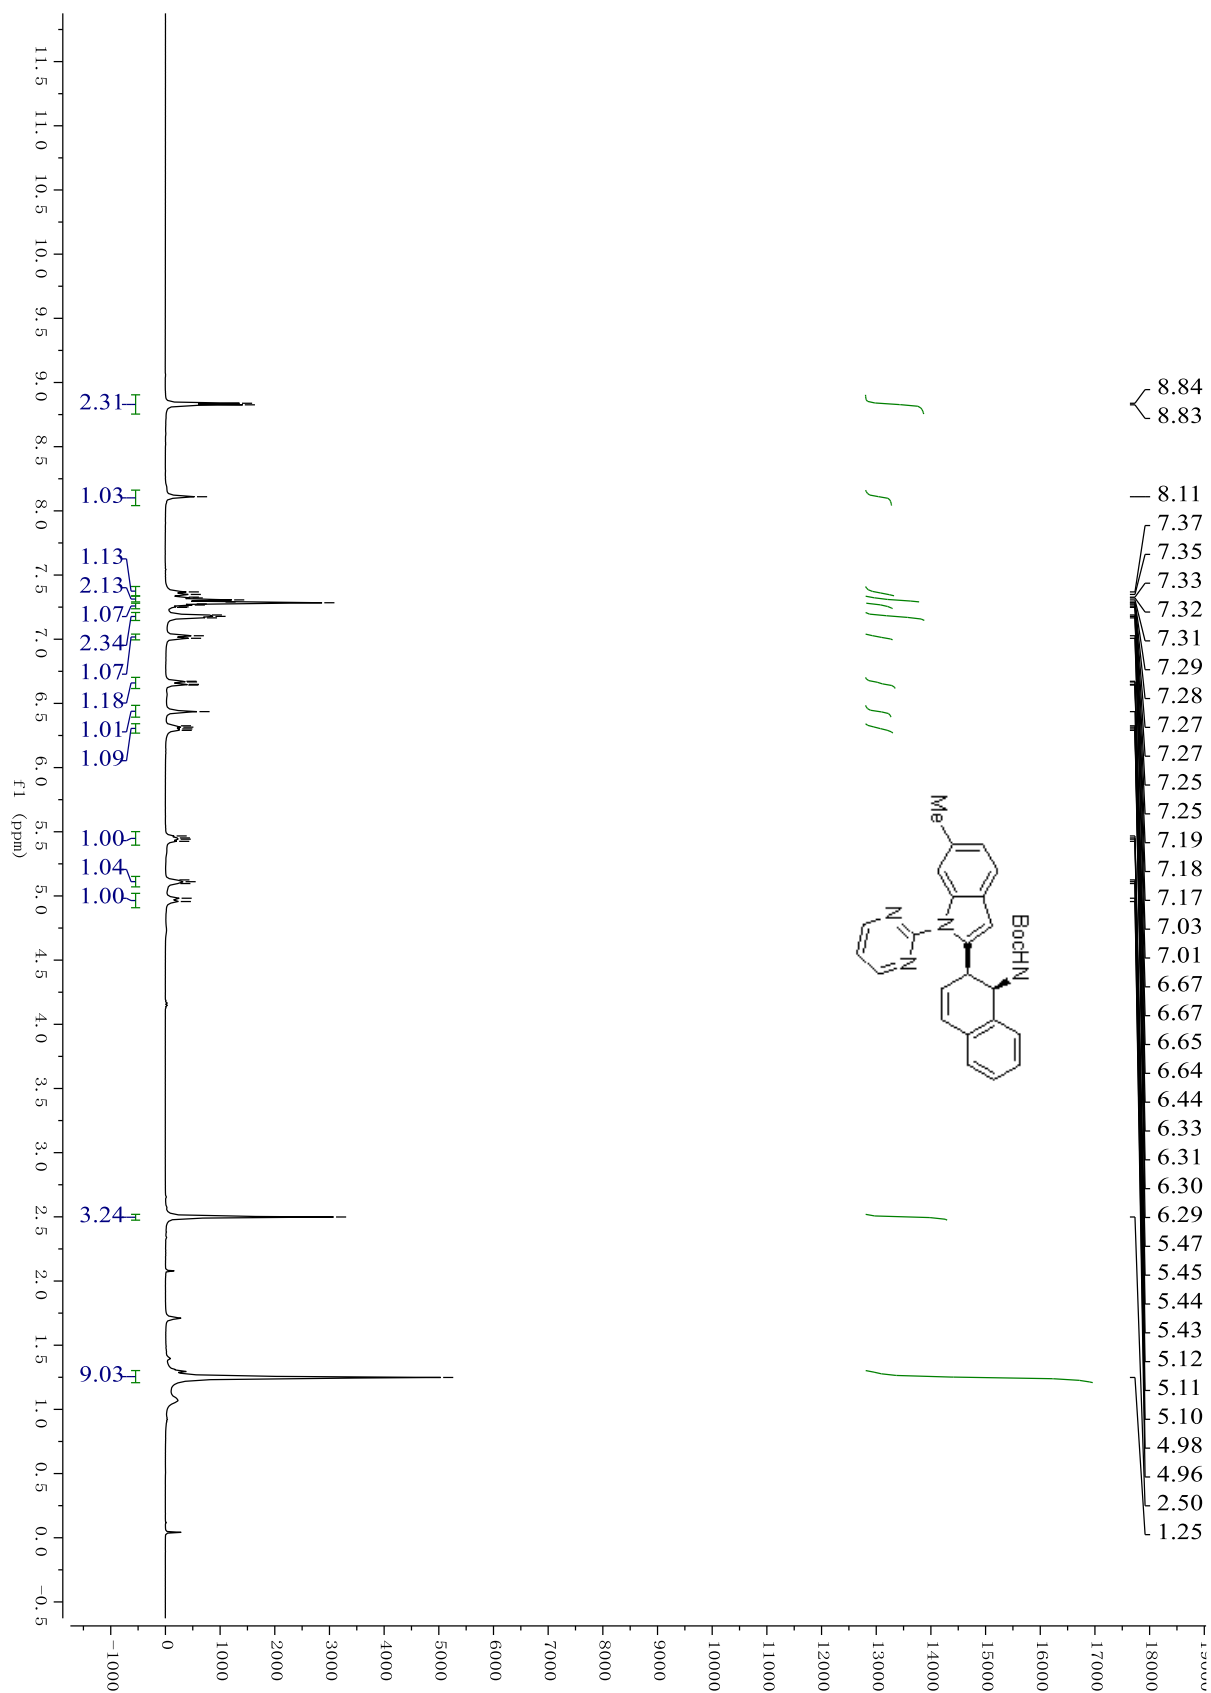

# SUPPLEMENTARY INFORMATION

## Supplementary Fig. 89 <sup>13</sup>C NMR Spectrum of *cis*-7ab

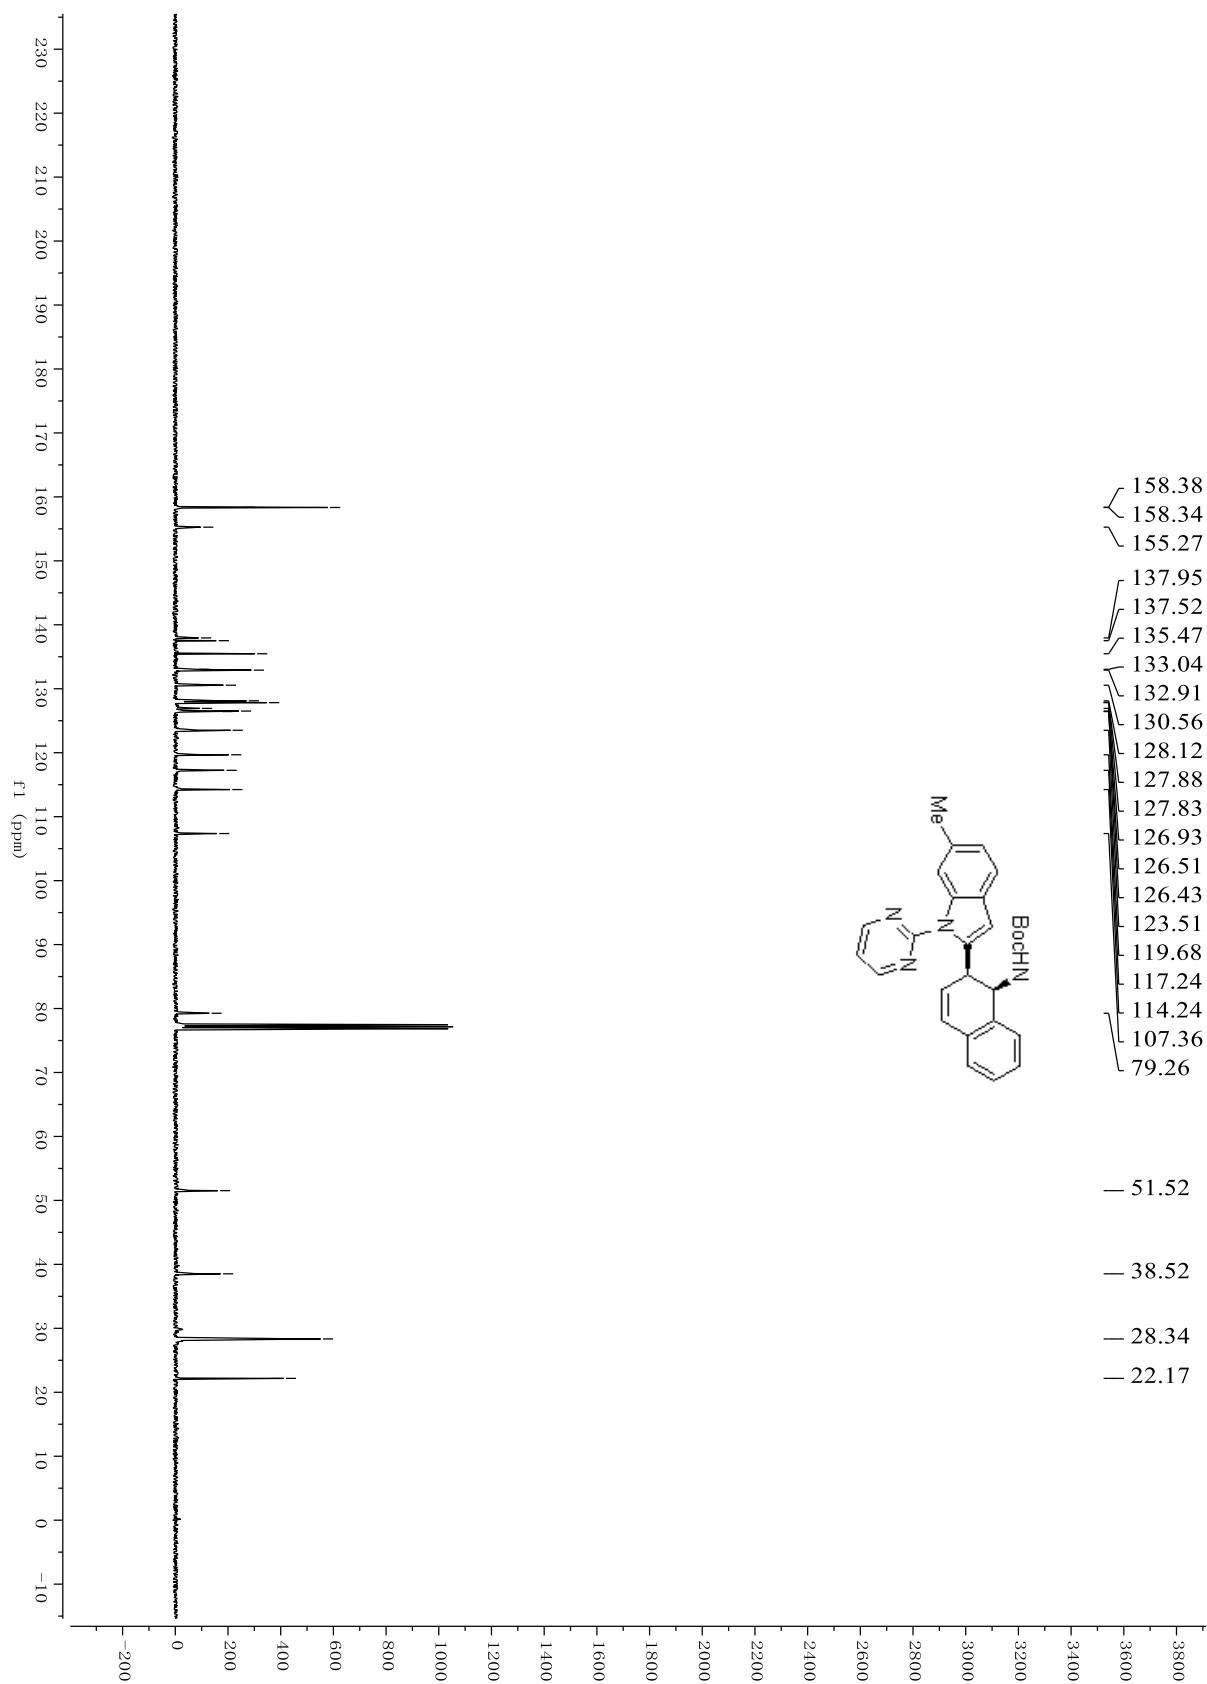

# SUPPLEMENTRAY INFORMATION

**Supplementary Fig. 90**  $^1\text{H}$  NMR Spectrum of *cis*-7ac

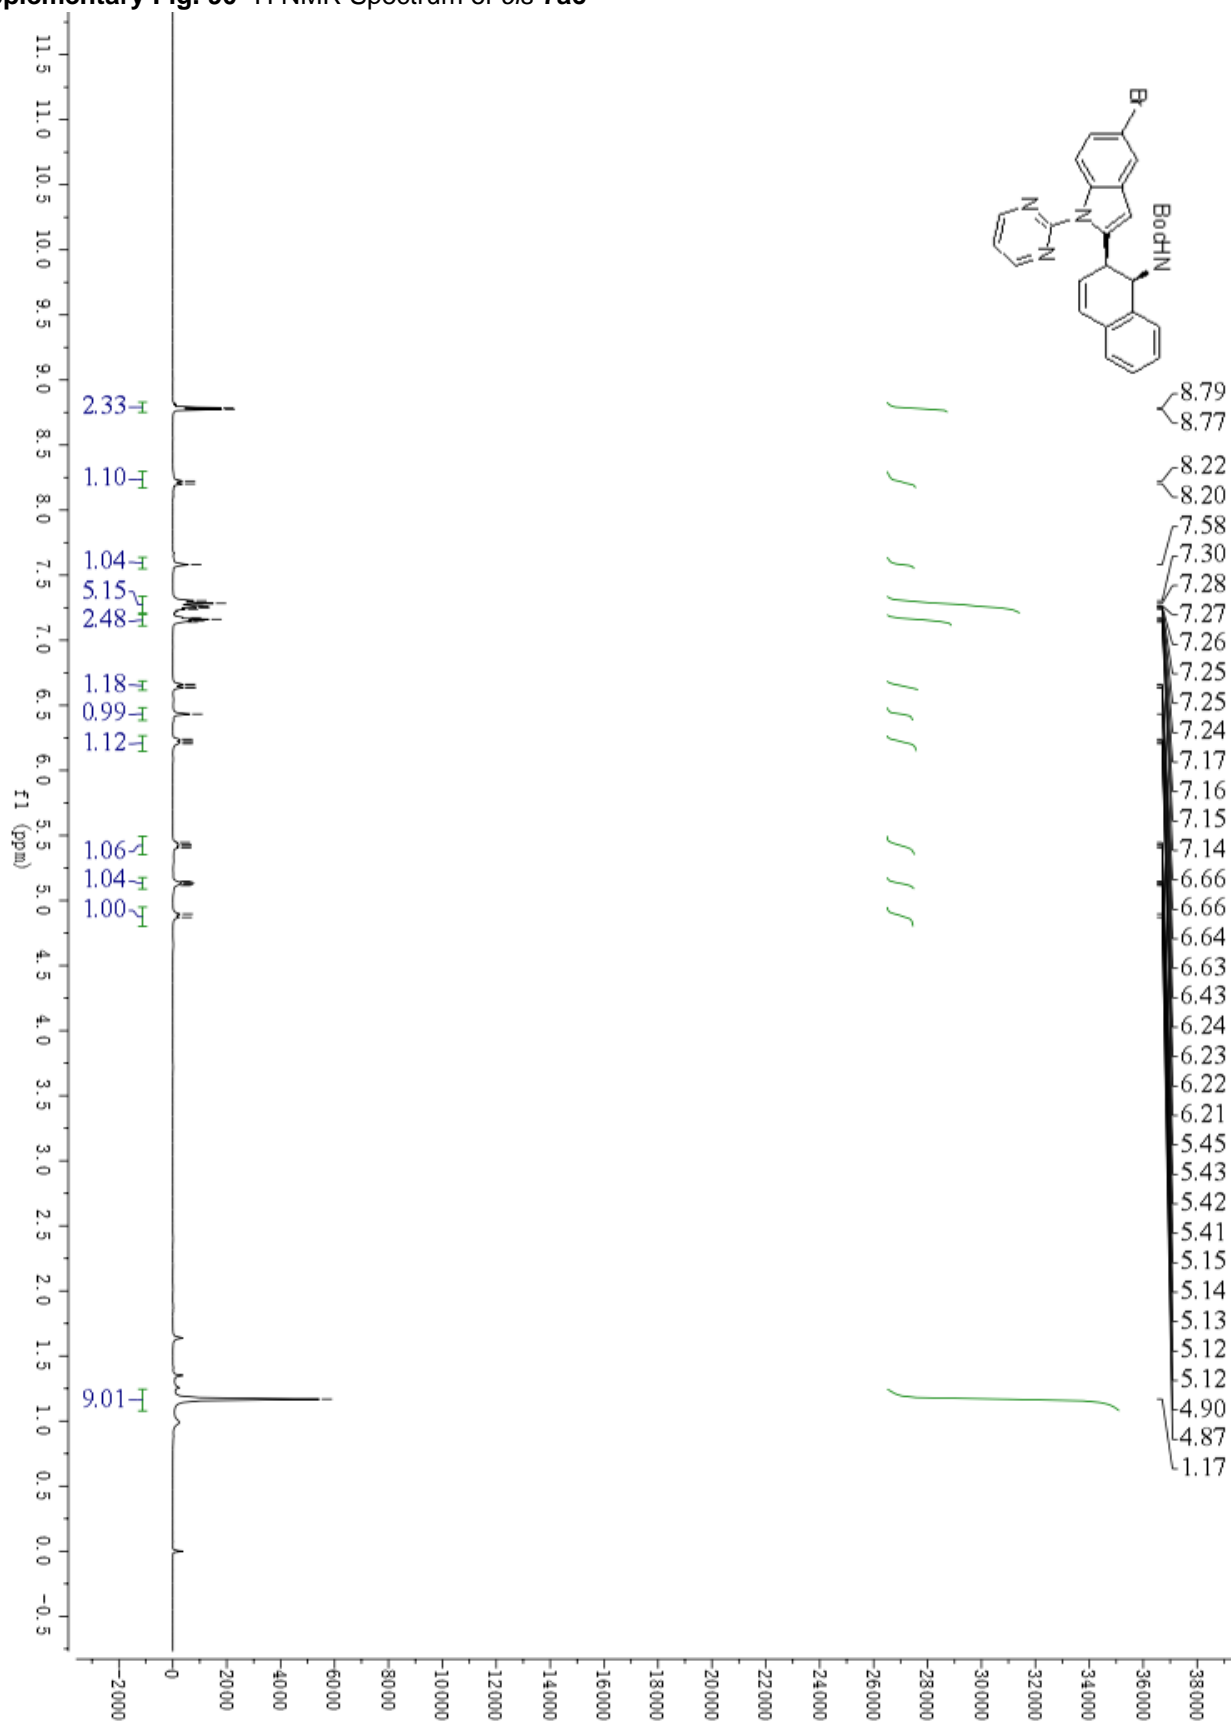

# SUPPLEMENTARY INFORMATION

**Supplementary Fig. 91**  $^{13}\text{C}$  NMR Spectrum of *cis*-7ac

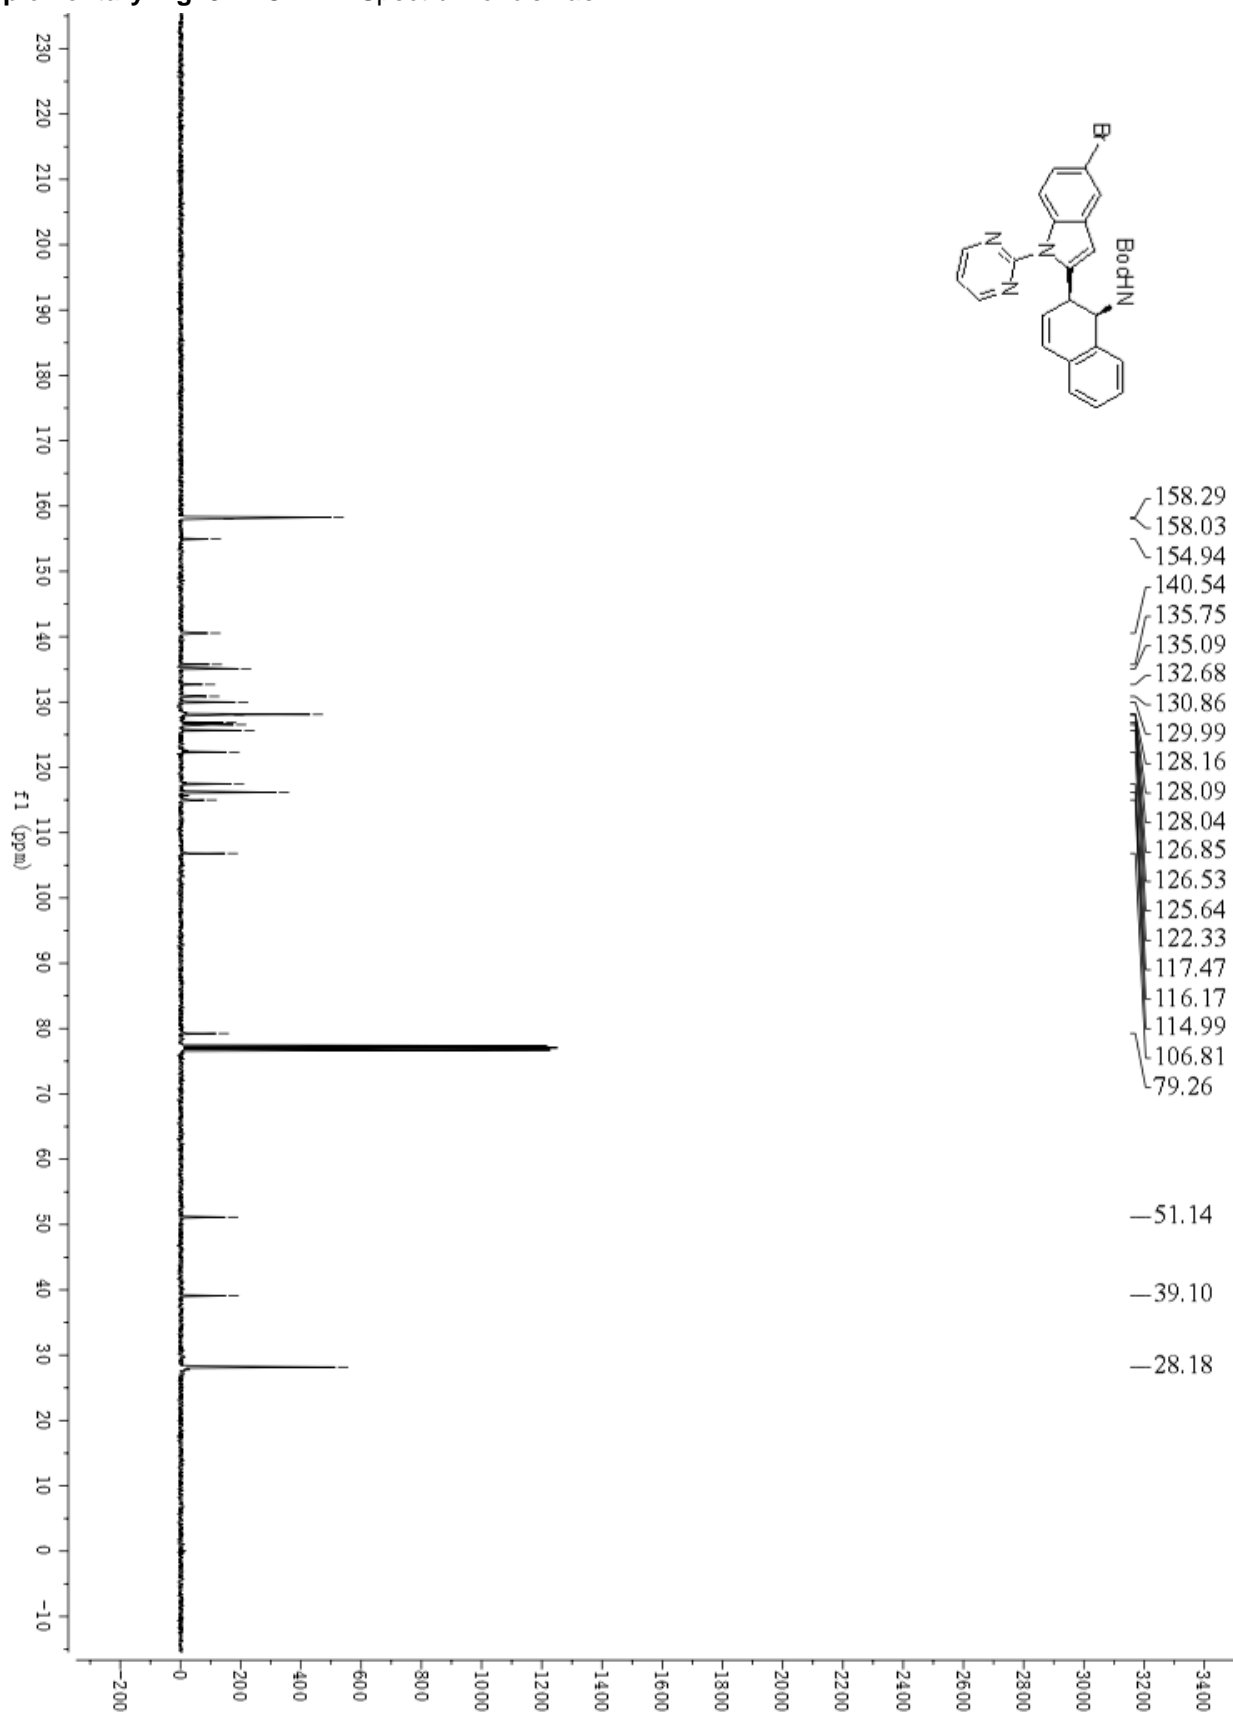

# SUPPLEMENTARY INFORMATION

**Supplementary Fig. 92**  $^1\text{H}$  NMR Spectrum of *cis*-7ad

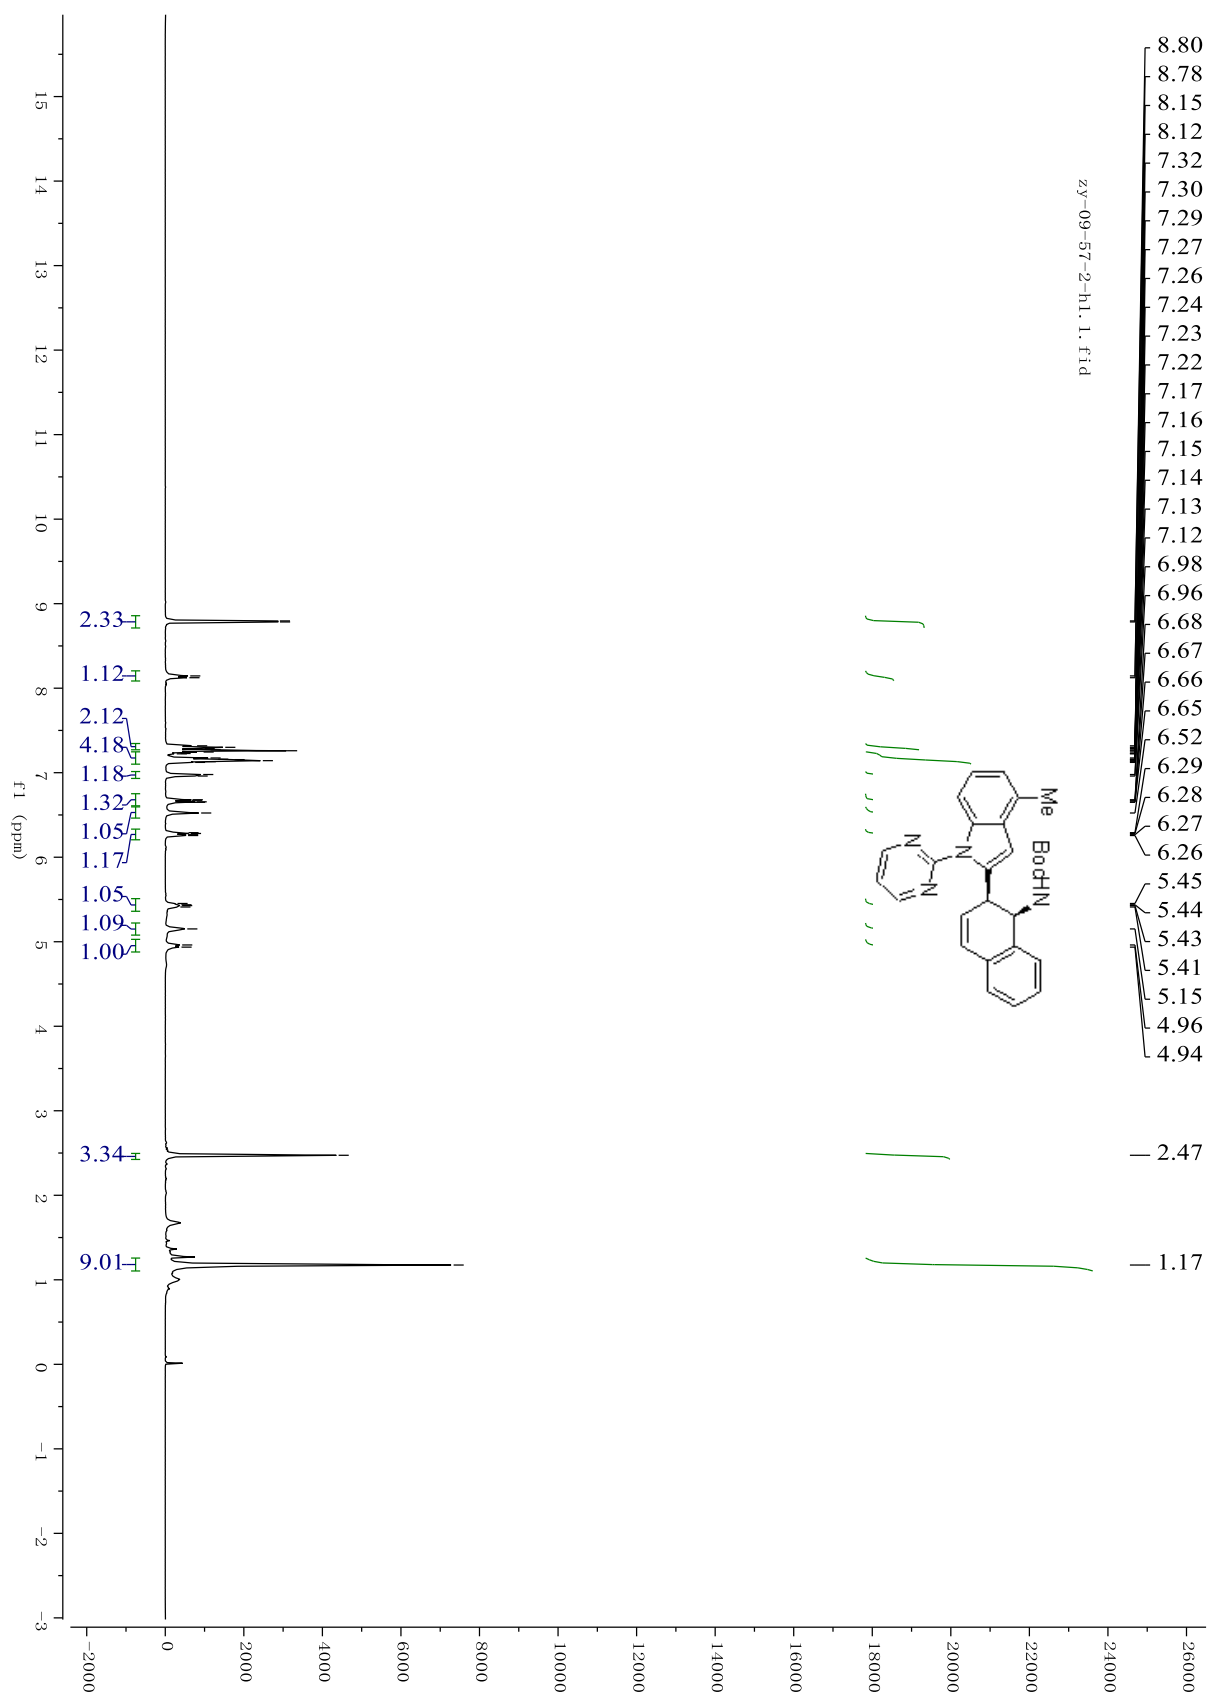

# SUPPLEMENTRAY INFORMATION

**Supplementary Fig. 93**  $^{13}\text{C}$  NMR Spectrum of *cis*-7ad

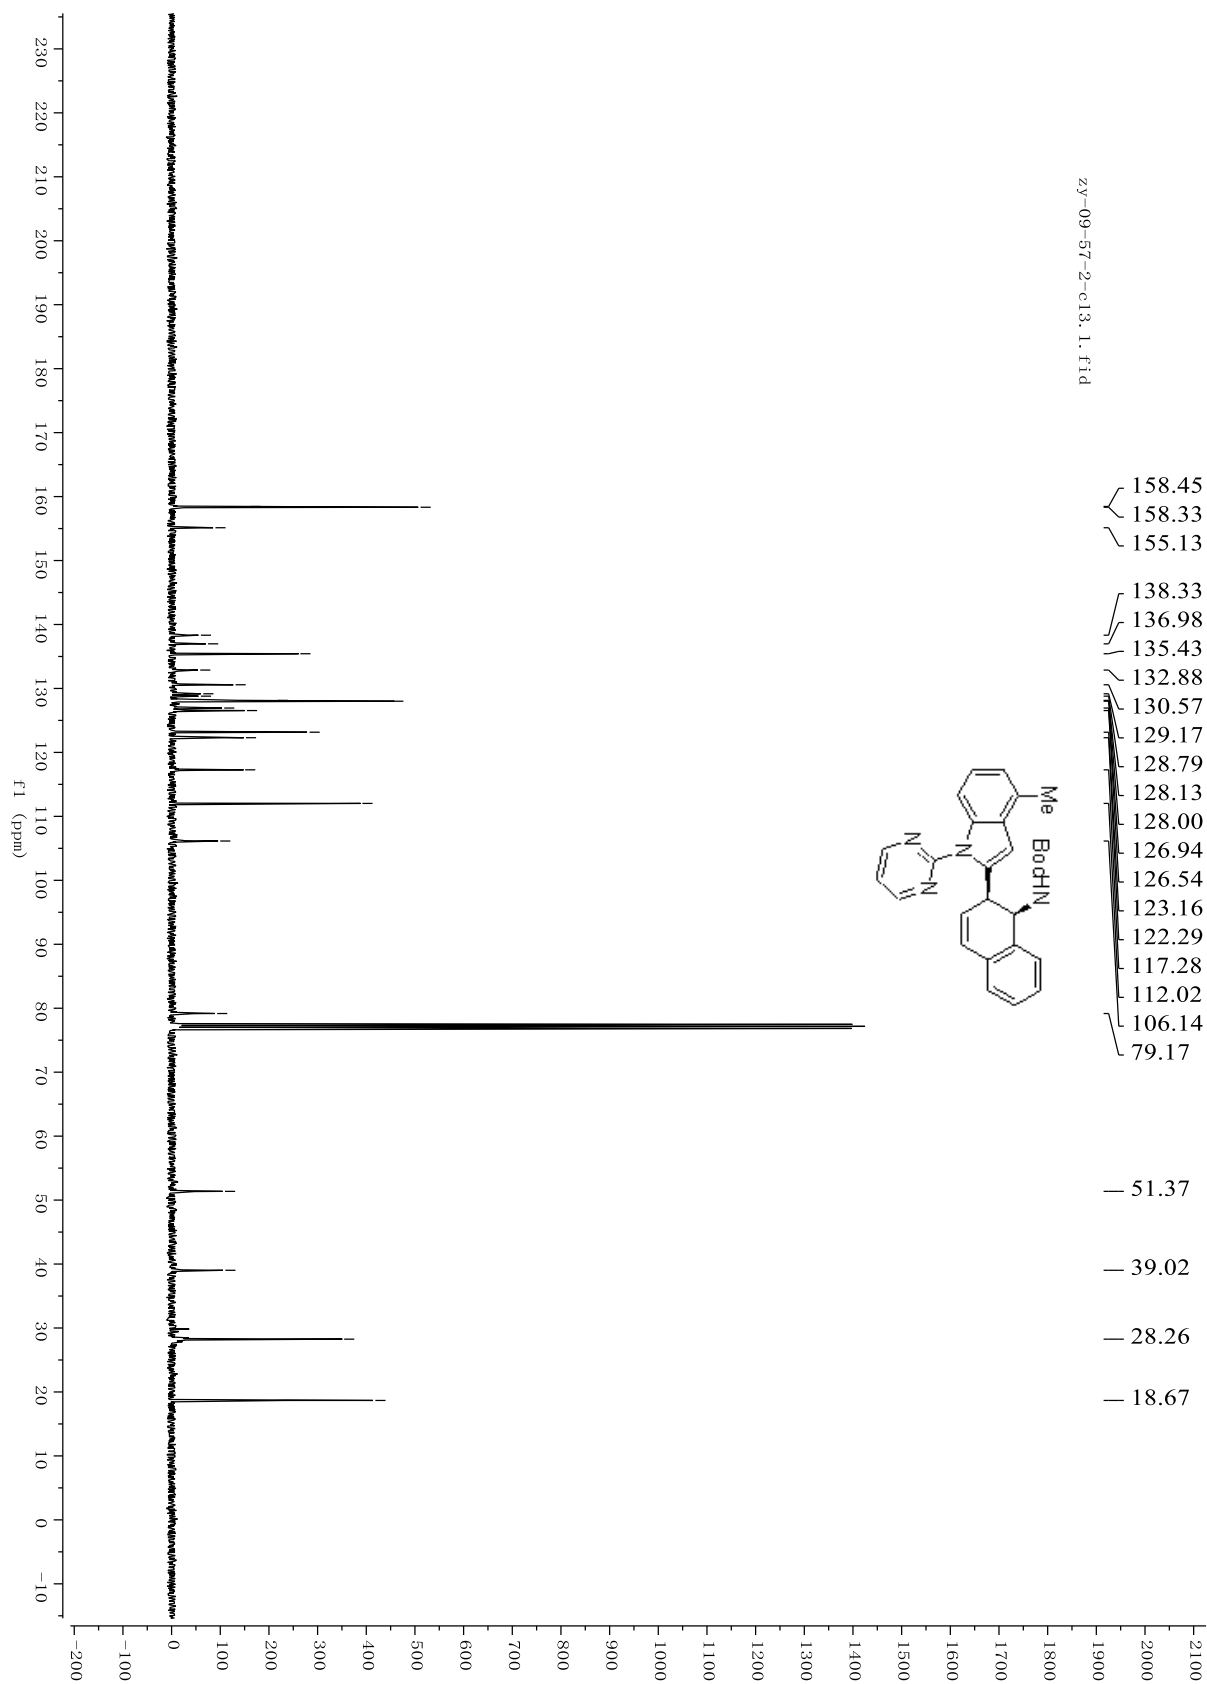



# SUPPLEMENTARY INFORMATION

**Supplementary Fig. 94**  $^1\text{H}$  NMR Spectrum of *cis*-7ae

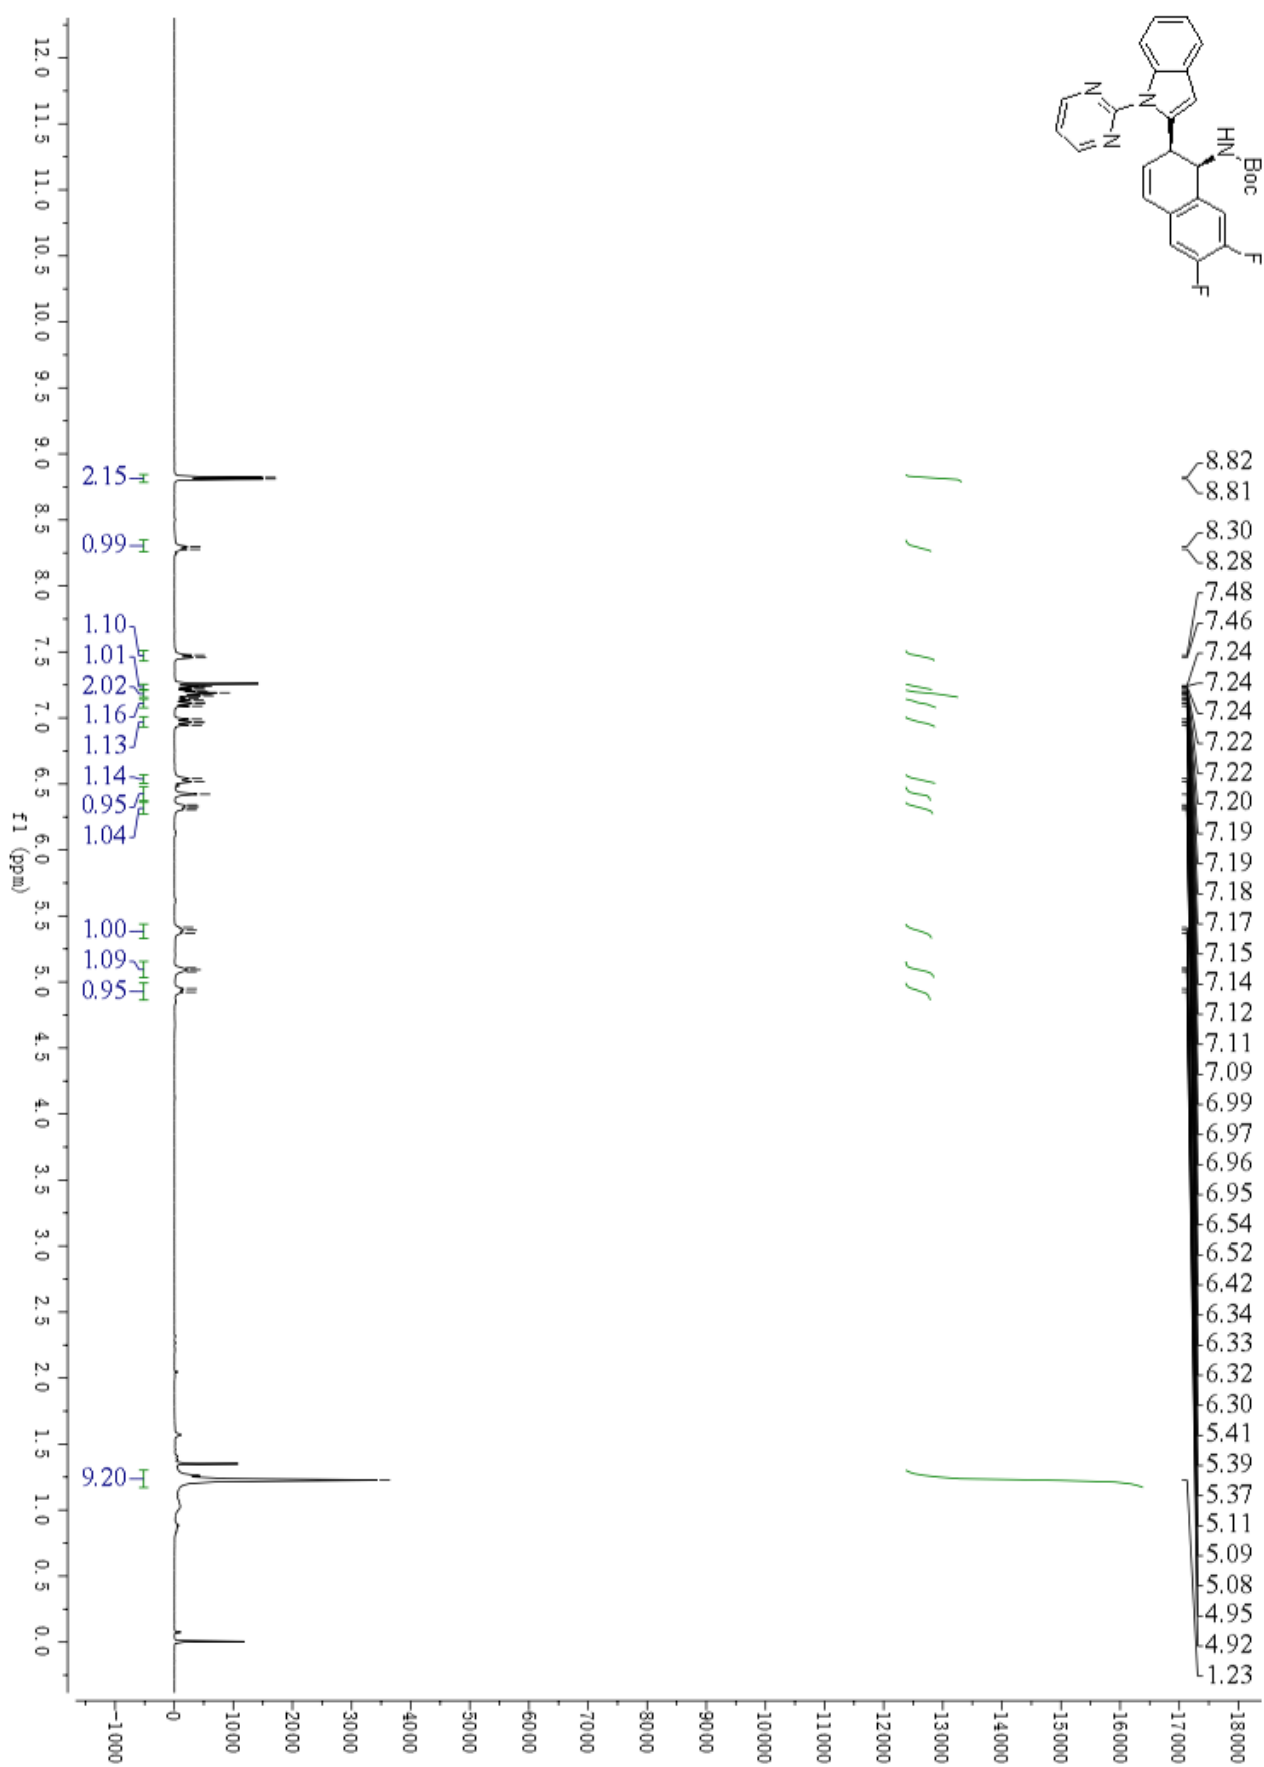

# SUPPLEMENTARY INFORMATION

**Supplementary Fig. 95**  $^{13}\text{C}$  NMR Spectrum of *cis*-7ae

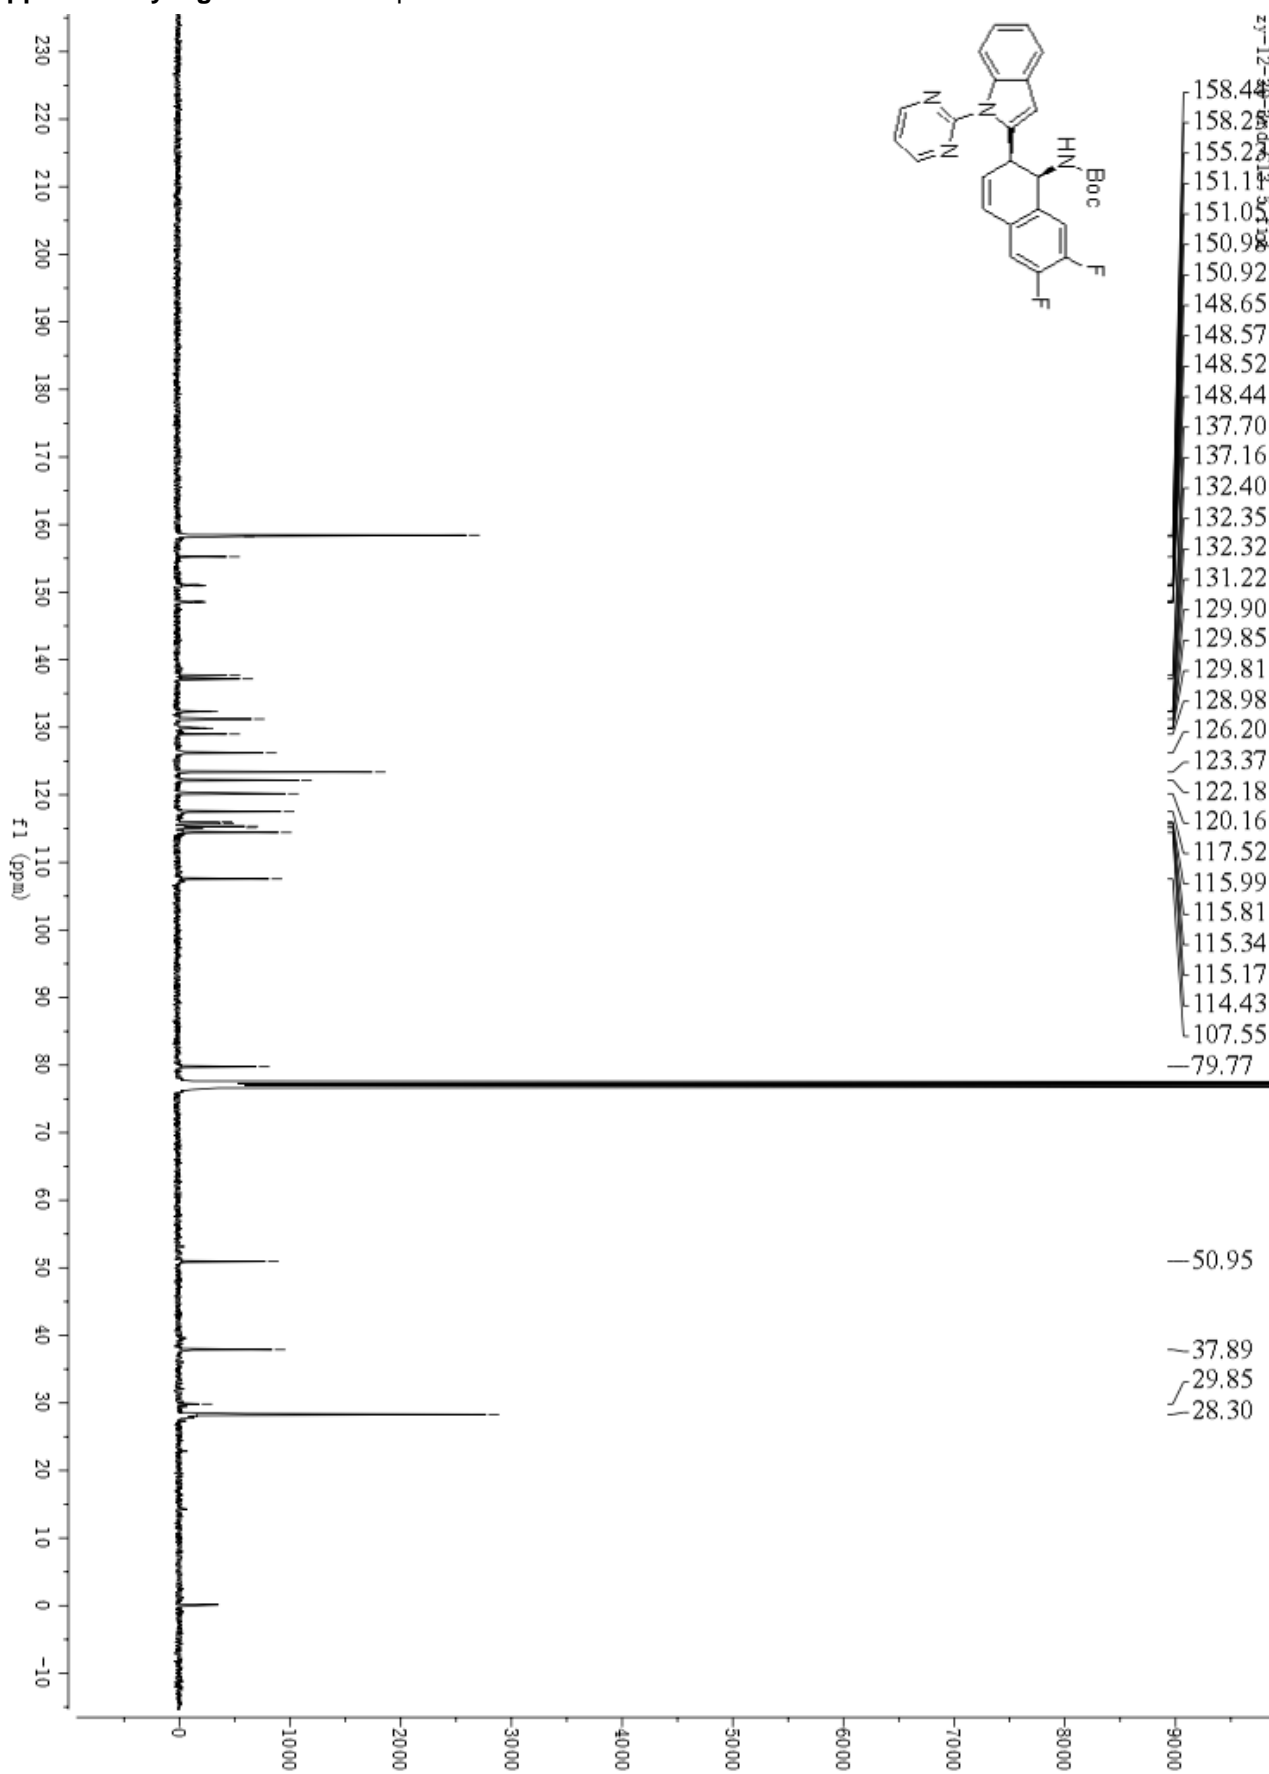

# SUPPLEMENTARY INFORMATION

**Supplementary Fig. 96**  $^{19}\text{F}$  NMR Spectrum of *cis-7ae*

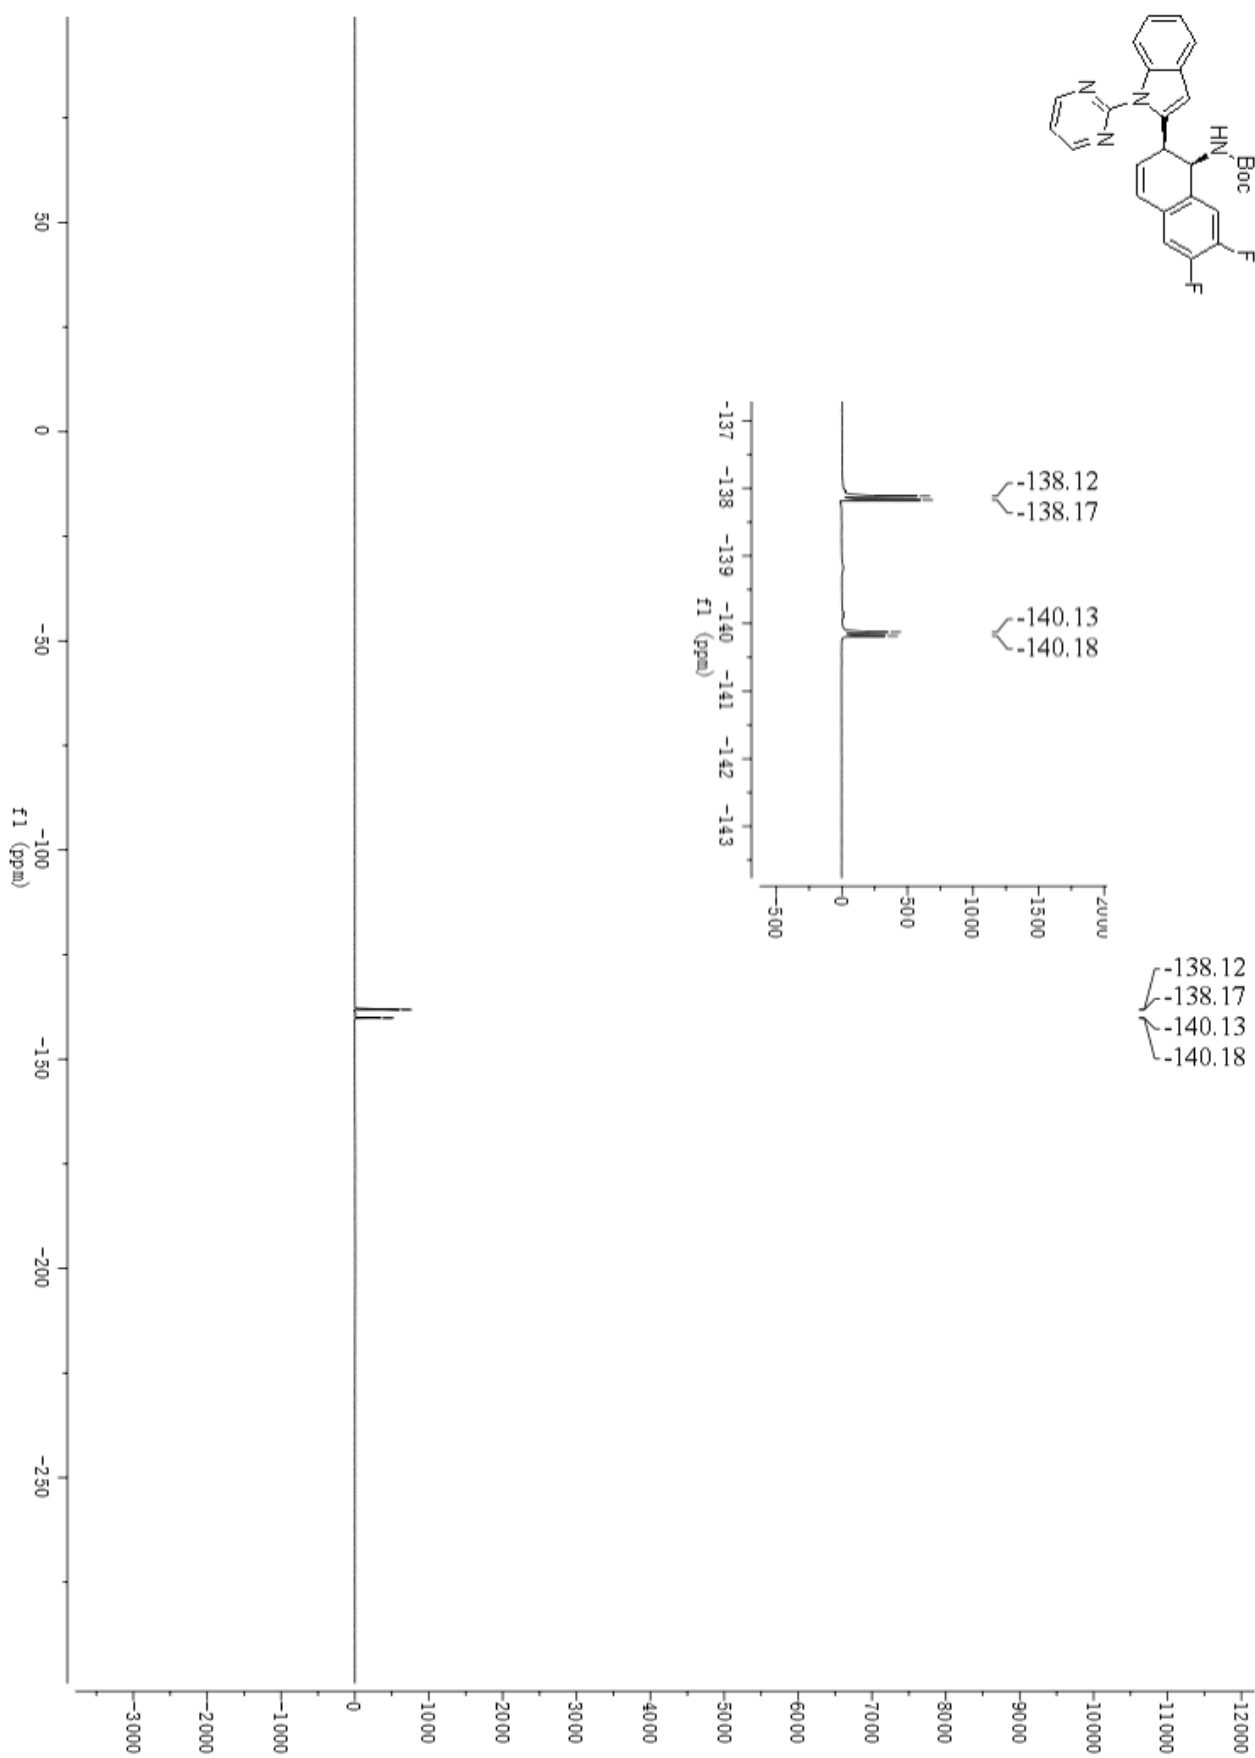

# SUPPLEMENTARY INFORMATION

**Supplementary Fig. 97**  $^1\text{H}$  NMR Spectrum of *cis*-7af

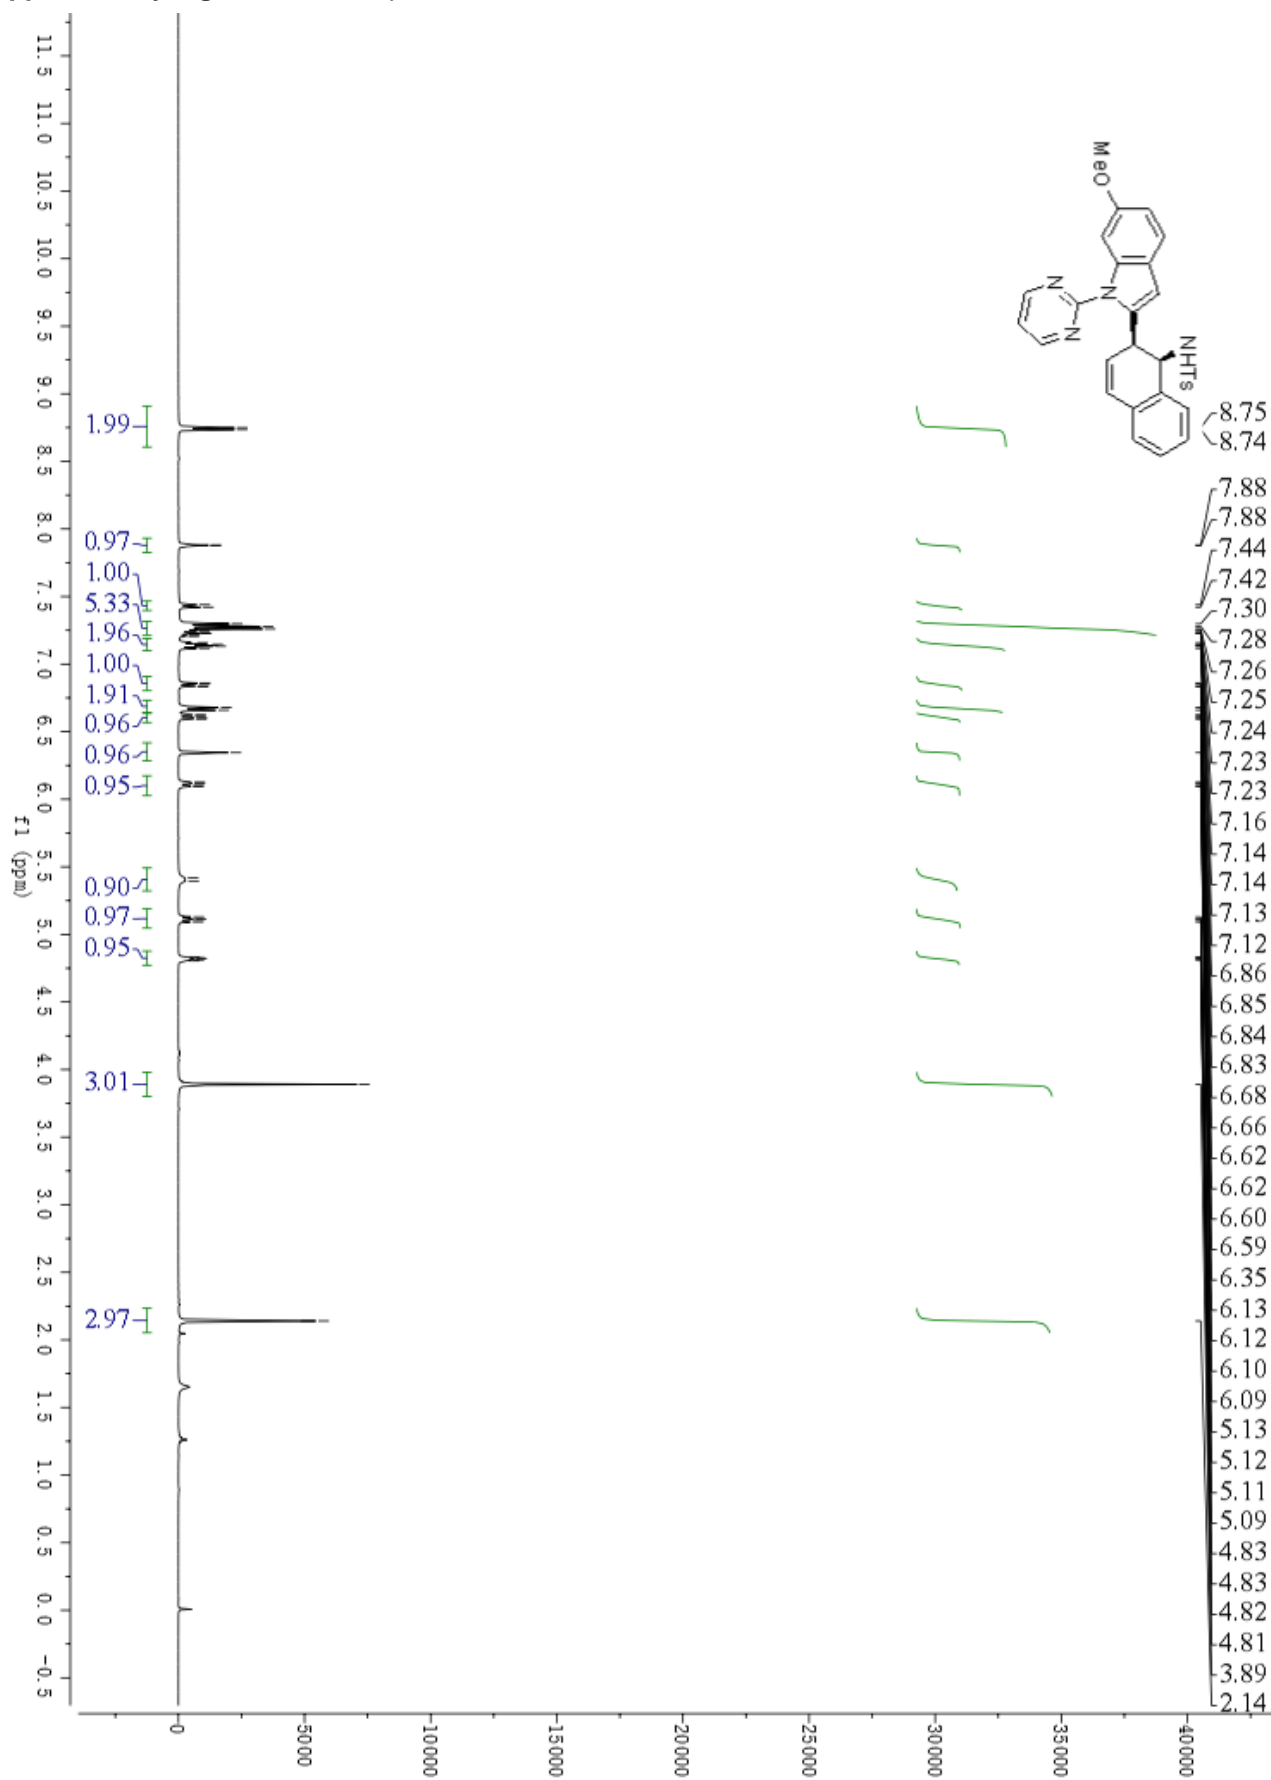

# SUPPLEMENTARY INFORMATION

**Supplementary Fig. 98**  $^1\text{H}$  NMR Spectrum of *trans*-7aa.

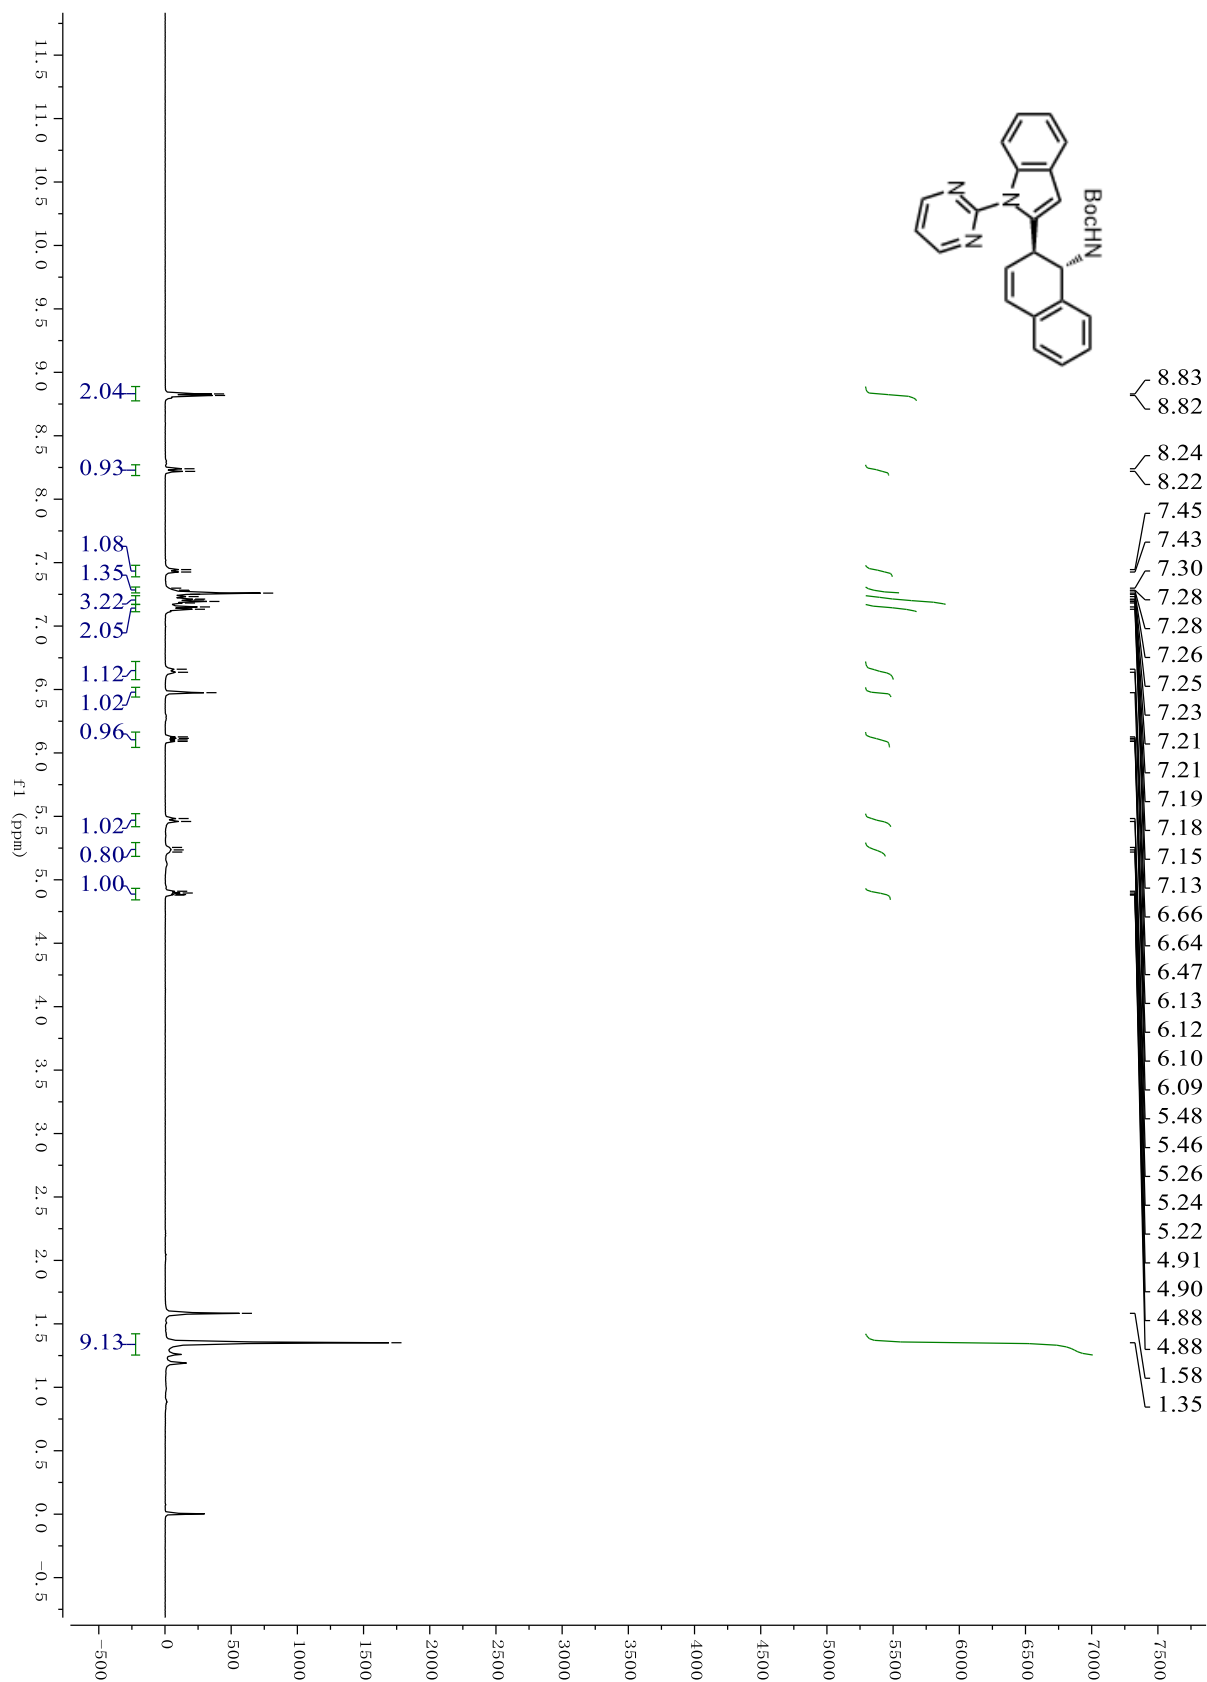

# SUPPLEMENTARY INFORMATION

**Supplementary Fig. 99**  $^{13}\text{C}$  NMR Spectrum of *trans*-7aa

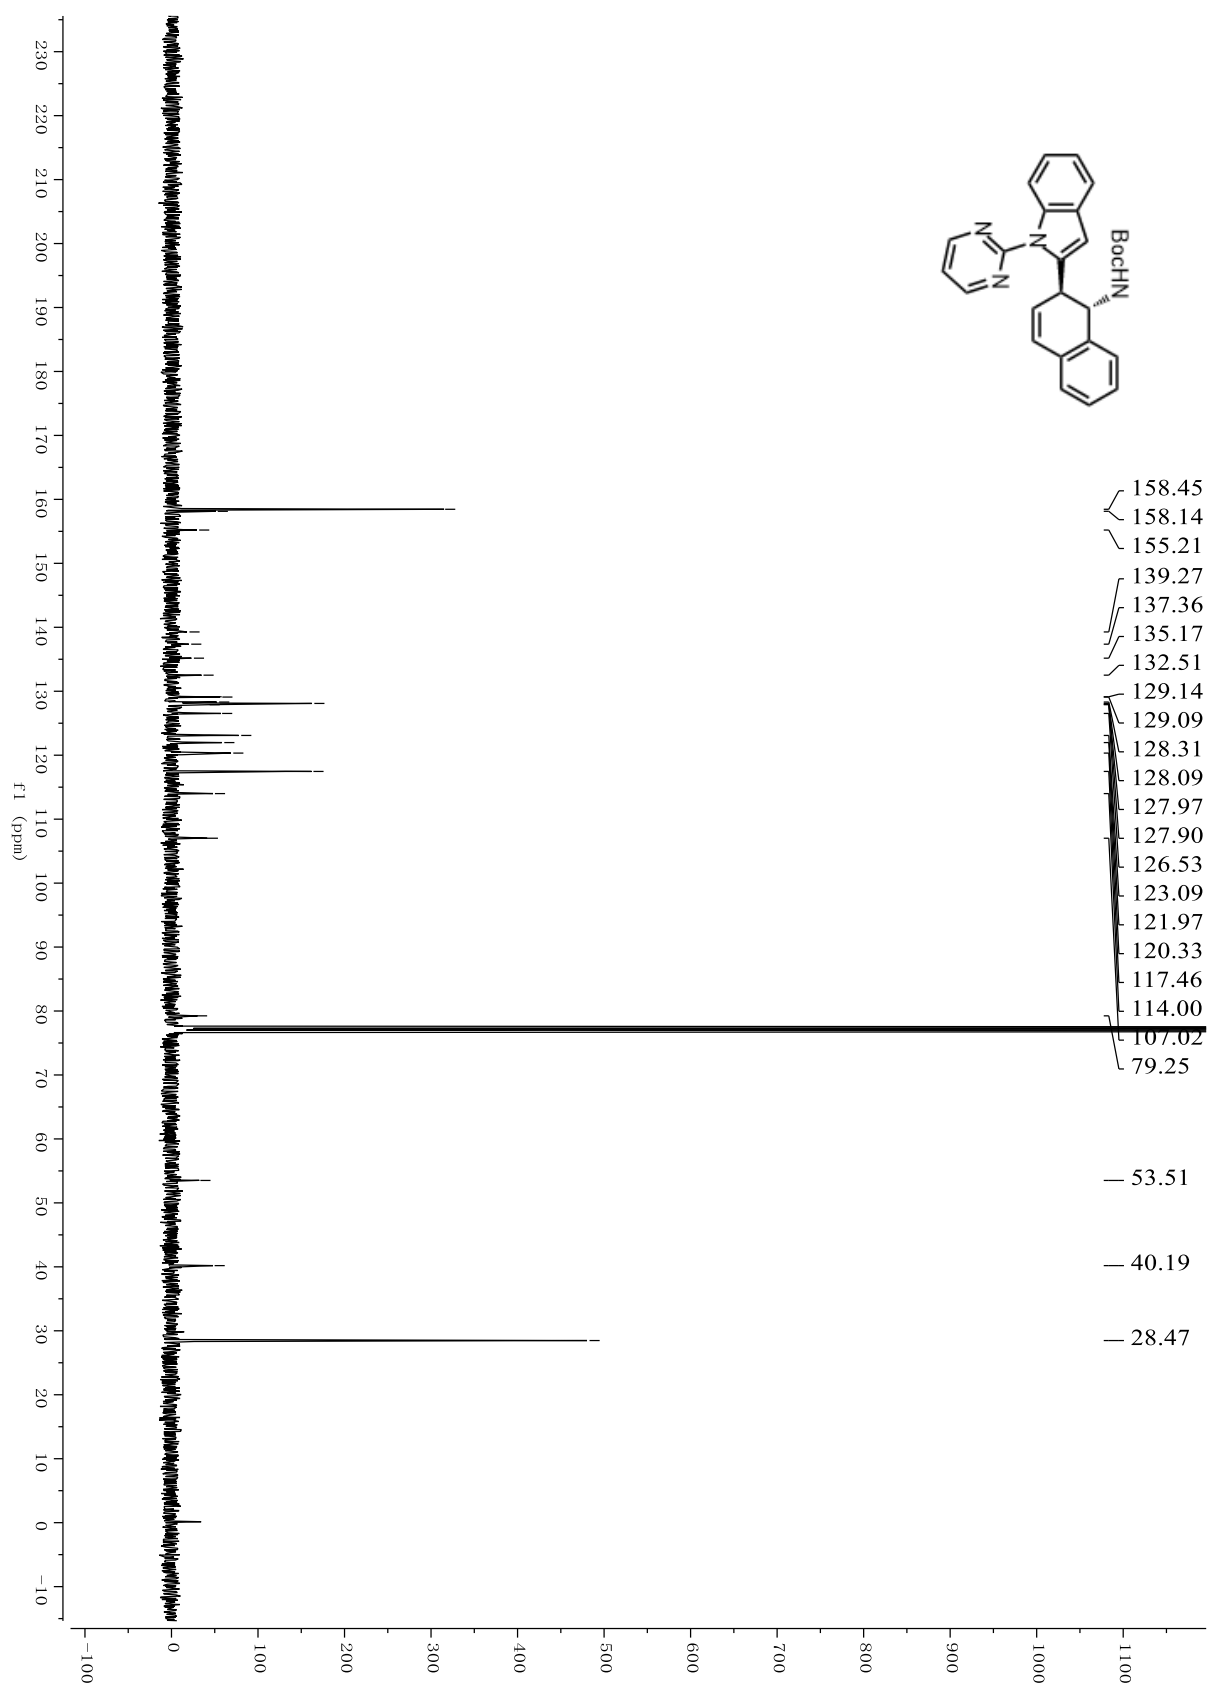

# SUPPLEMENTARY INFORMATION

**Supplementary Fig. 100**  $^1\text{H}$  NMR Spectrum of *trans*-7ab

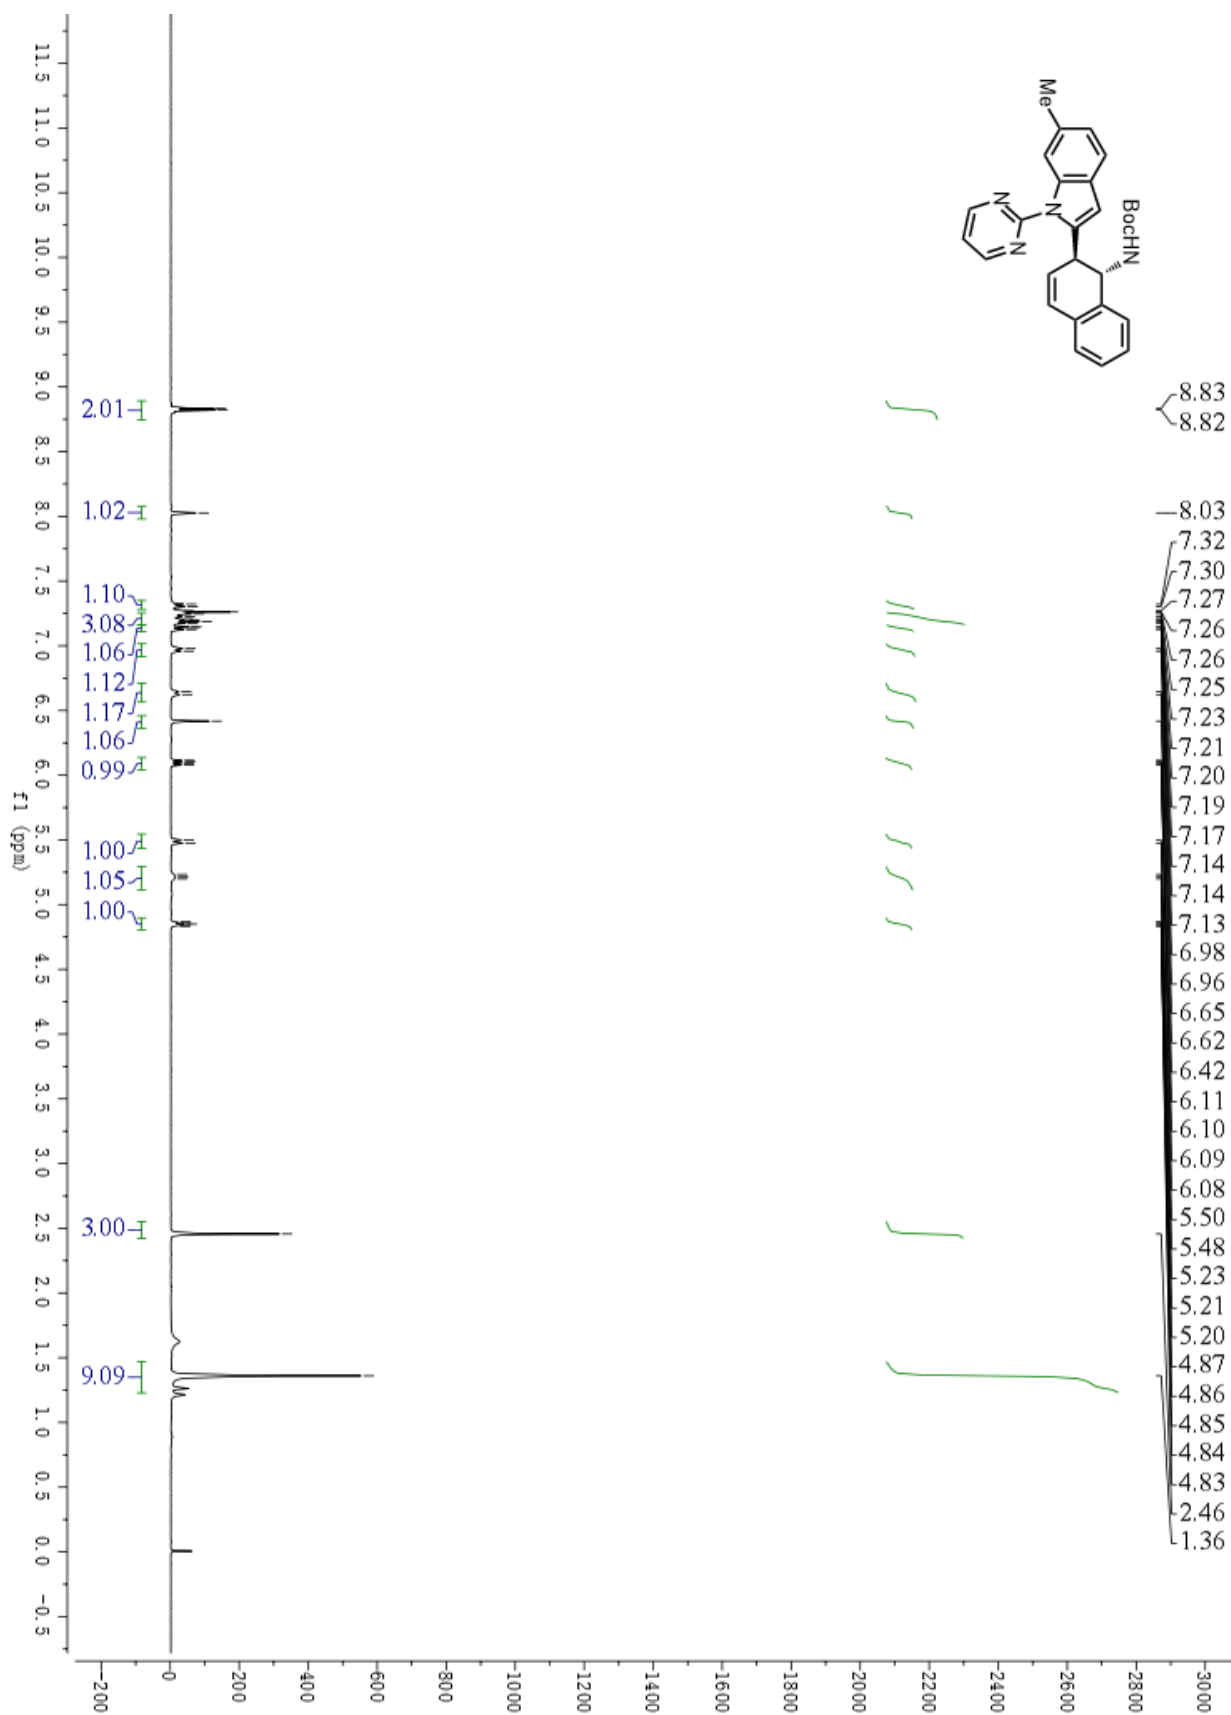

# SUPPLEMENTARY INFORMATION

**Supplementary Fig. 101**  $^{13}\text{C}$  NMR Spectrum of *trans*-7ab

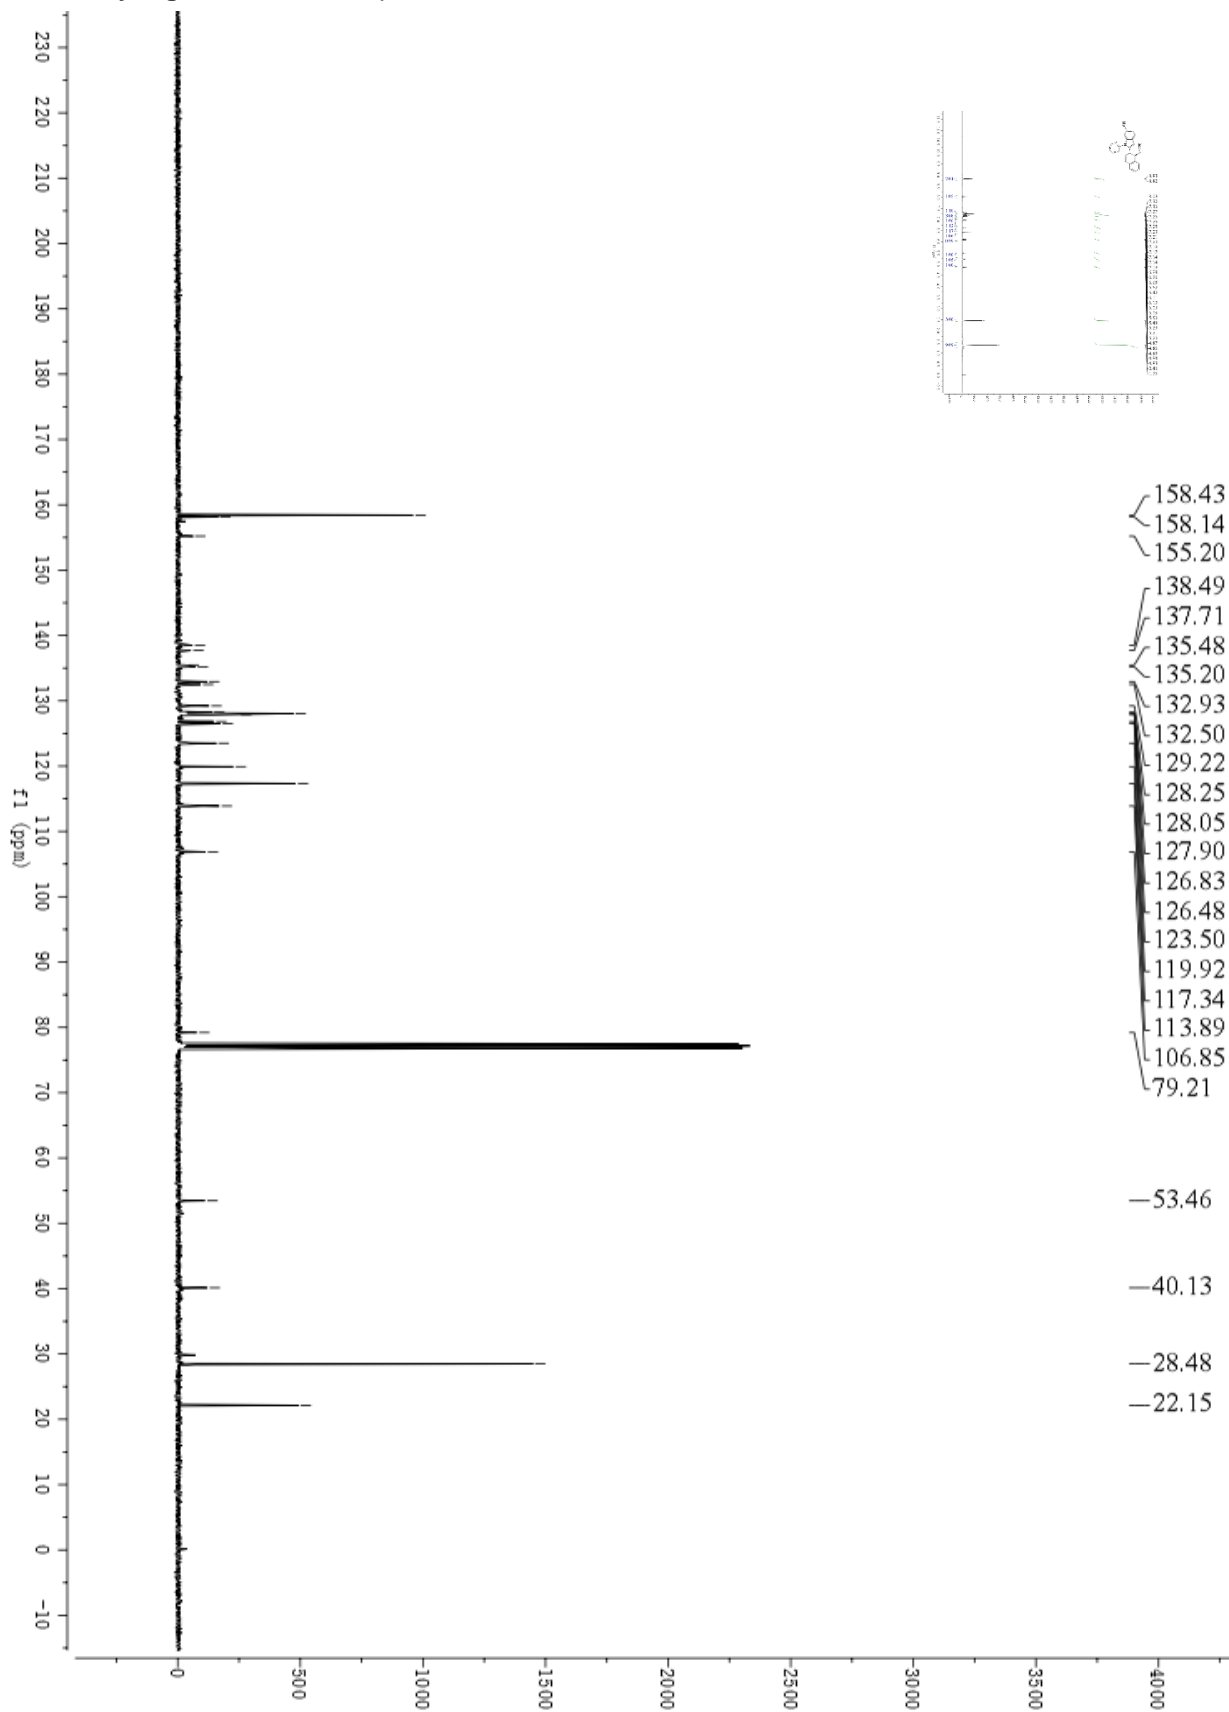



# SUPPLEMENTRAY INFORMATION

**Supplementary Fig. 102**  $^1\text{H}$  NMR Spectrum of *trans*-7ab'

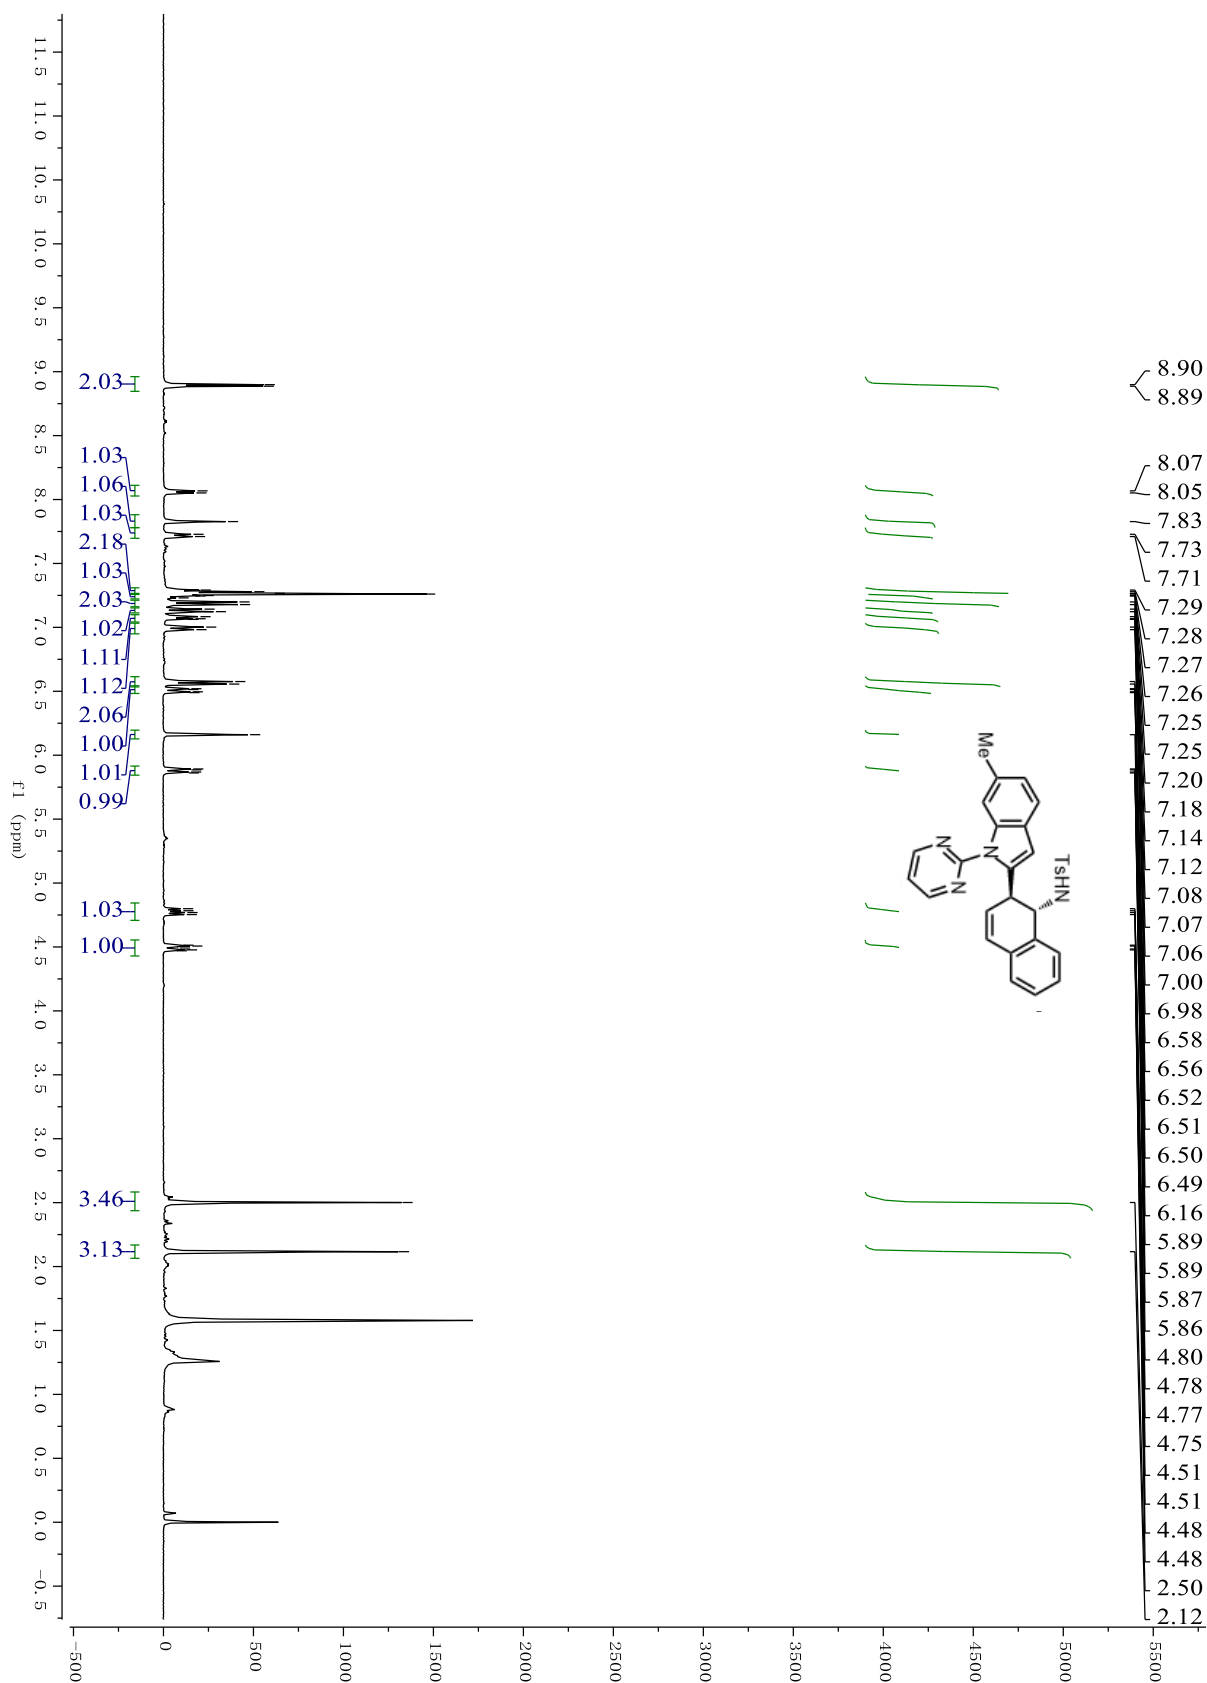

# SUPPLEMENTARY INFORMATION

**Supplementary Fig. 103**  $^{13}\text{C}$  NMR Spectrum of *trans*-7ab'

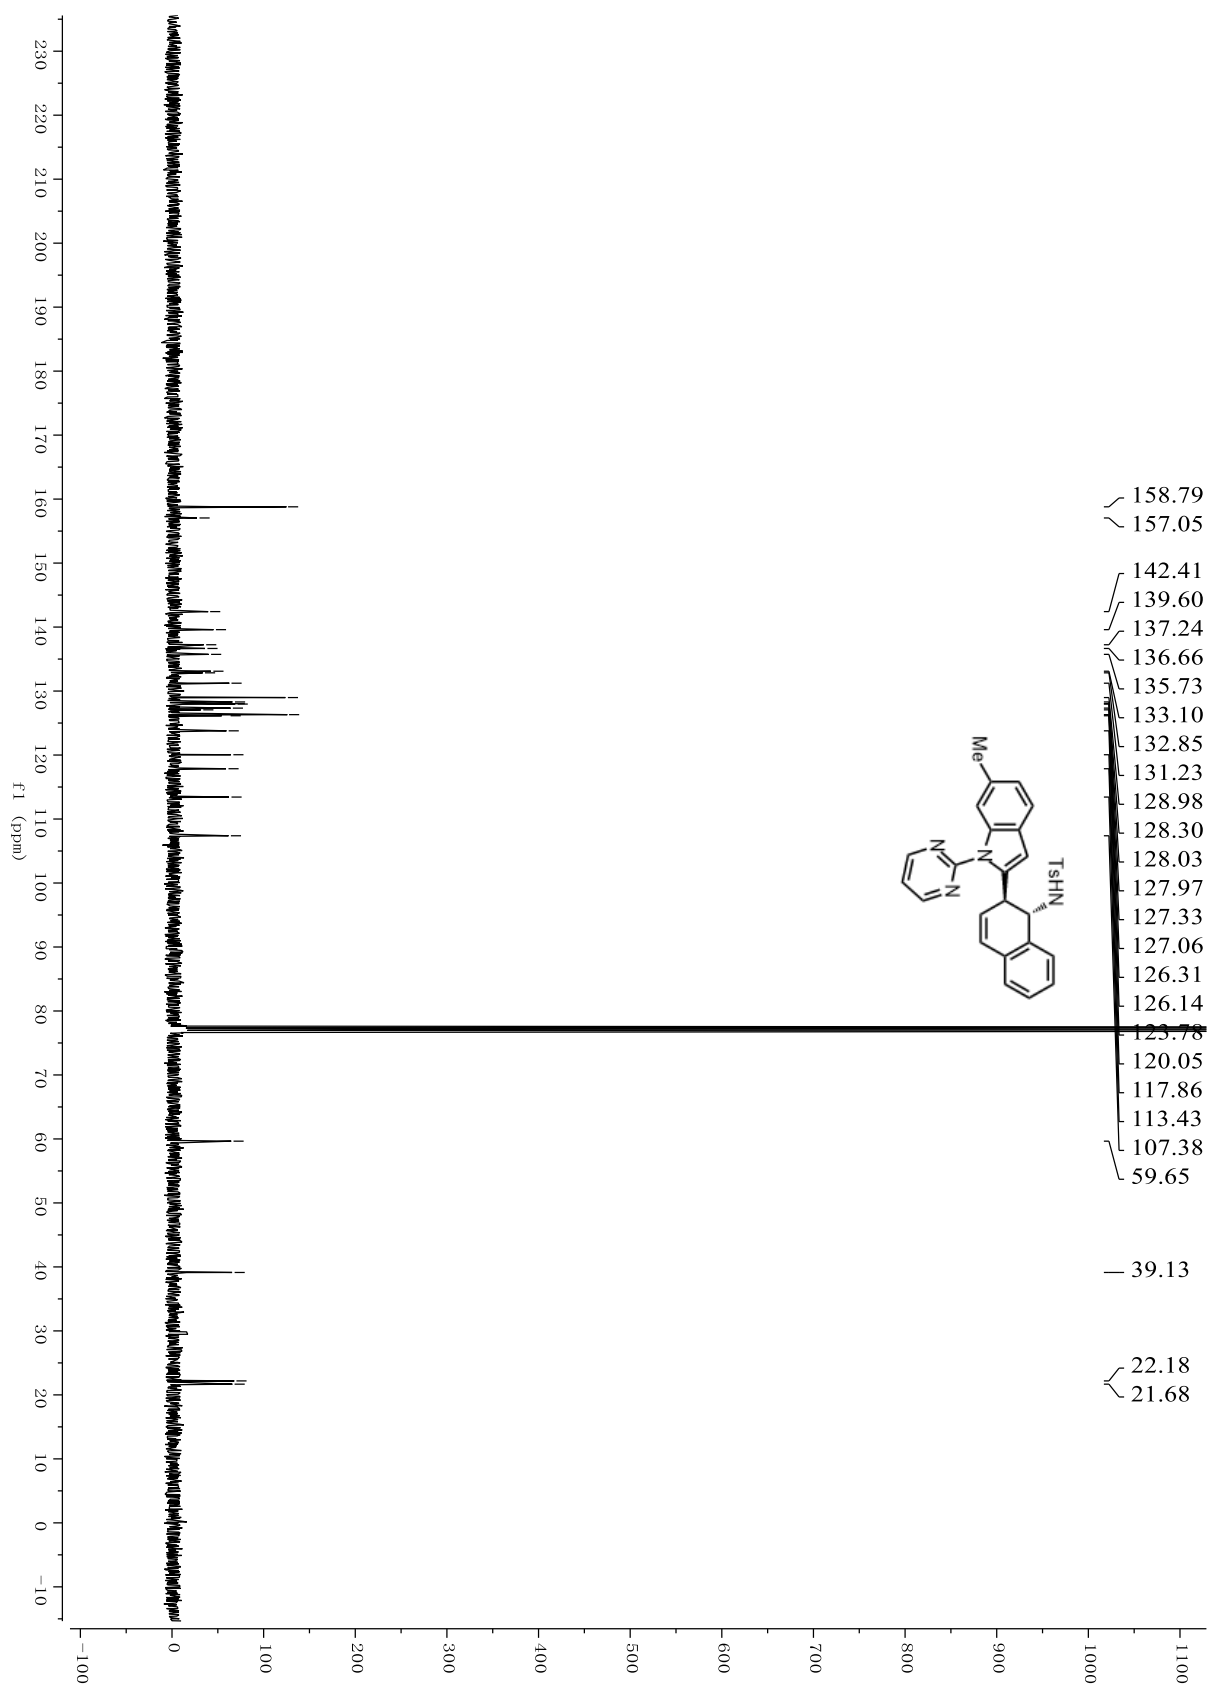

# SUPPLEMENTARY INFORMATION

**Supplementary Fig. 104**  $^1\text{H}$  NMR Spectrum of *trans*-7ac

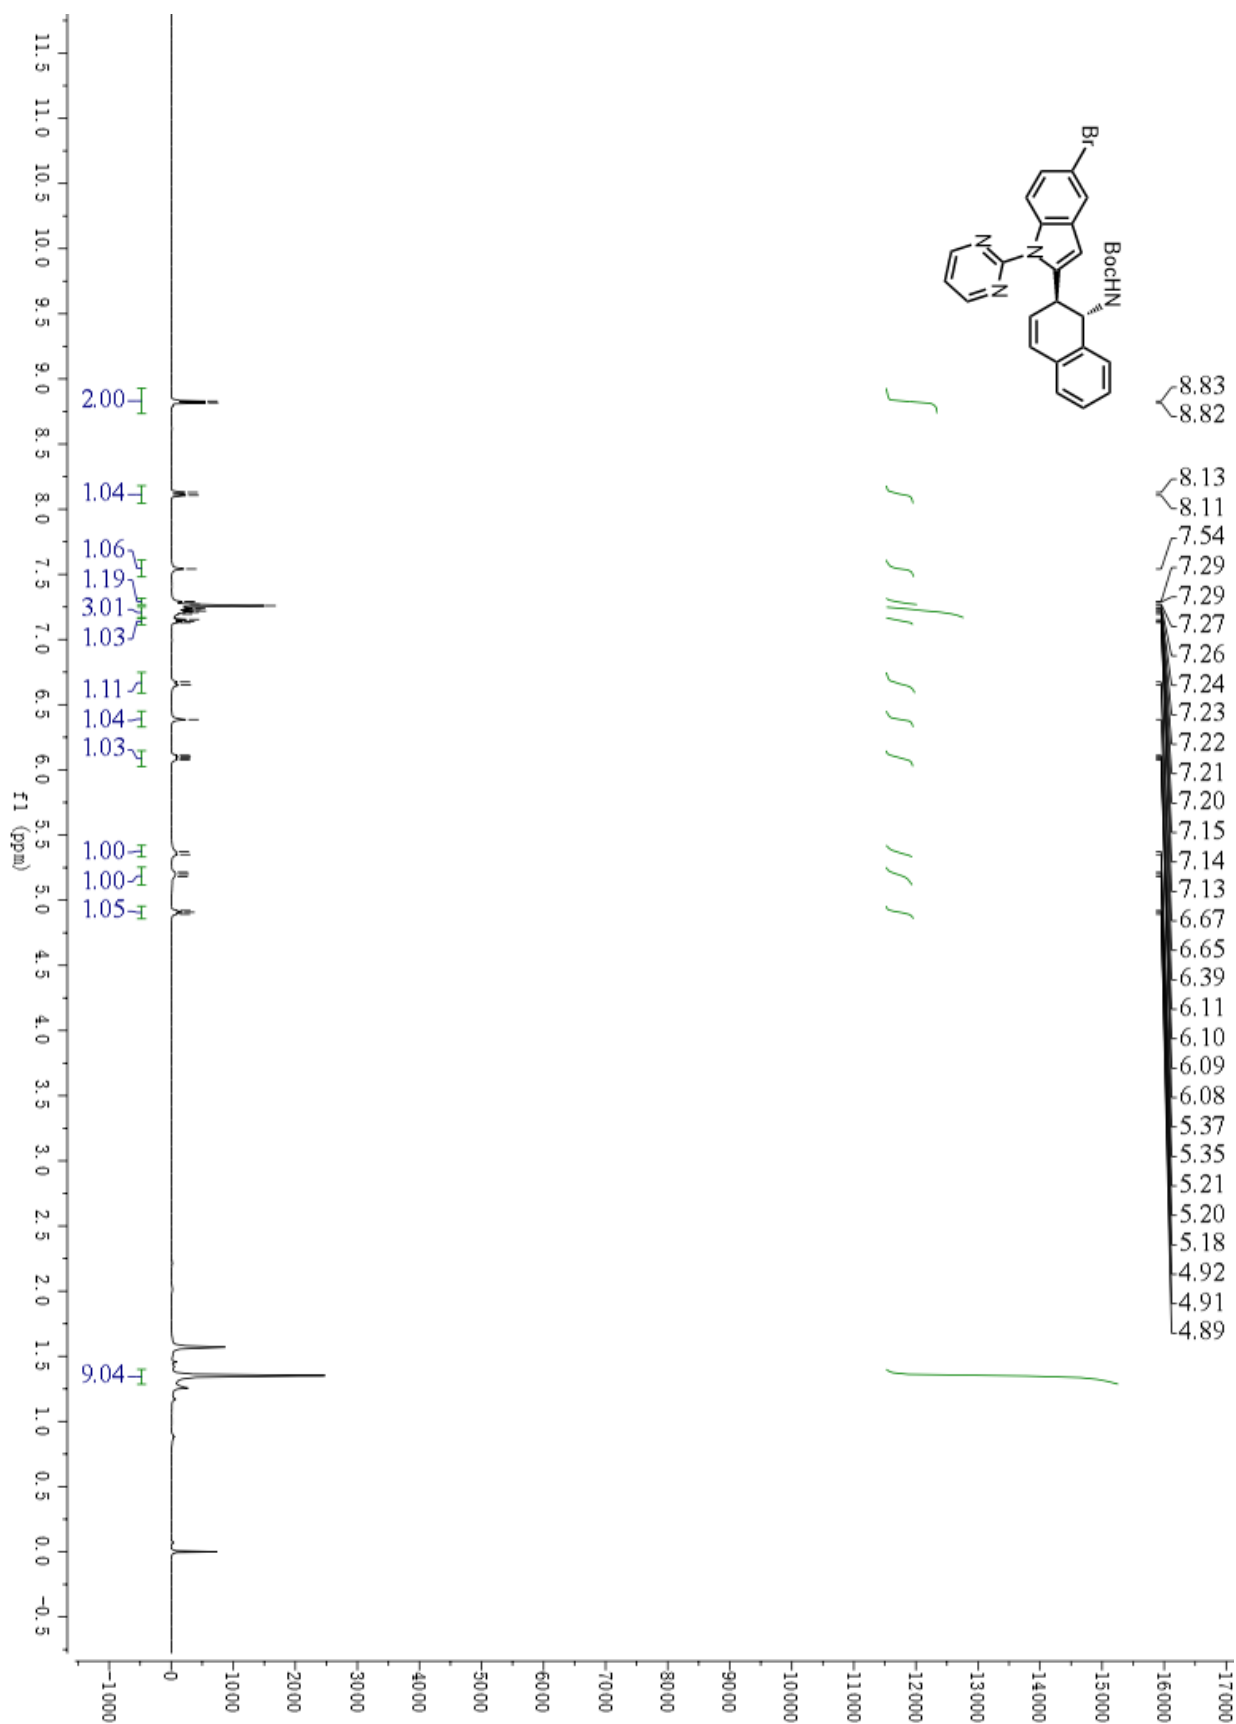

# SUPPLEMENTARY INFORMATION

Supplementary Fig. 105  $^{13}\text{C}$  NMR Spectrum of *trans*-7ac

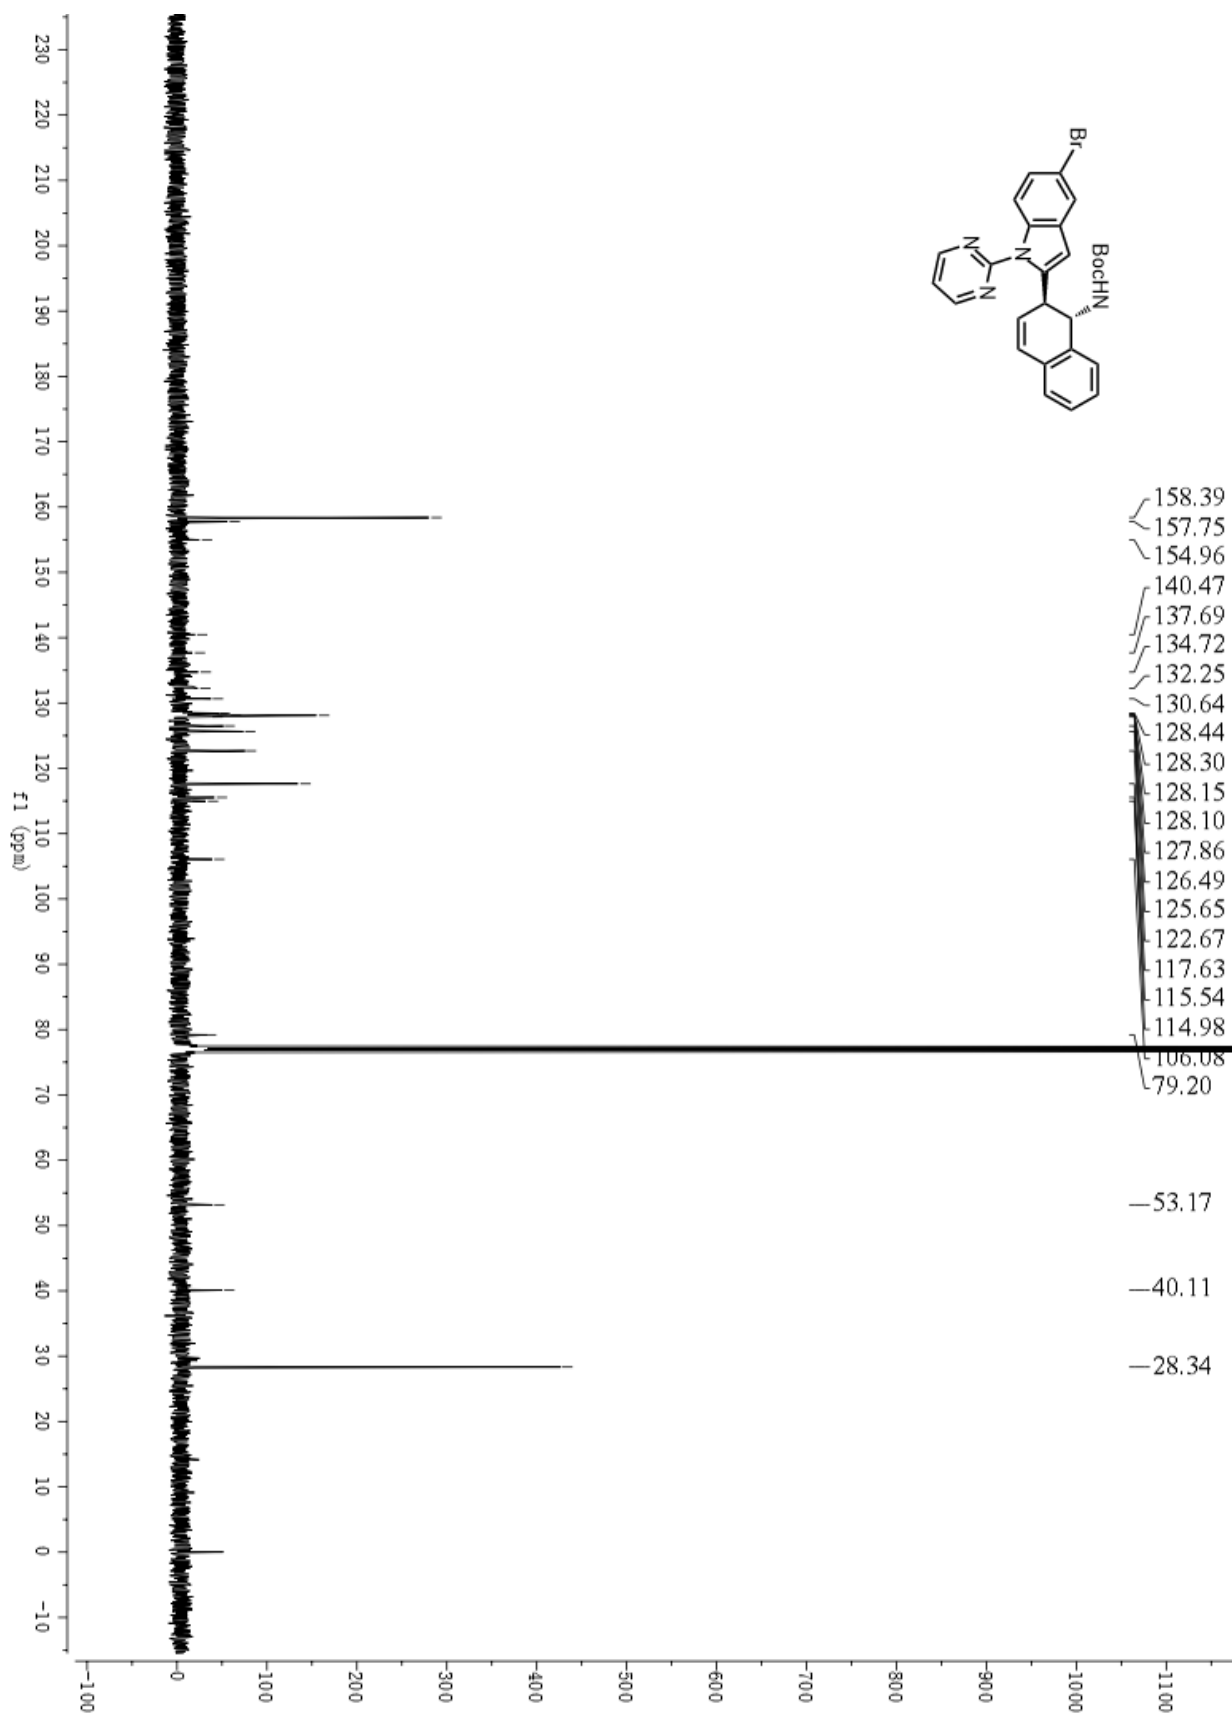

# SUPPLEMENTARY INFORMATION

**Supplementary Fig. 106**  $^1\text{H}$  NMR Spectrum of *trans*-7ad

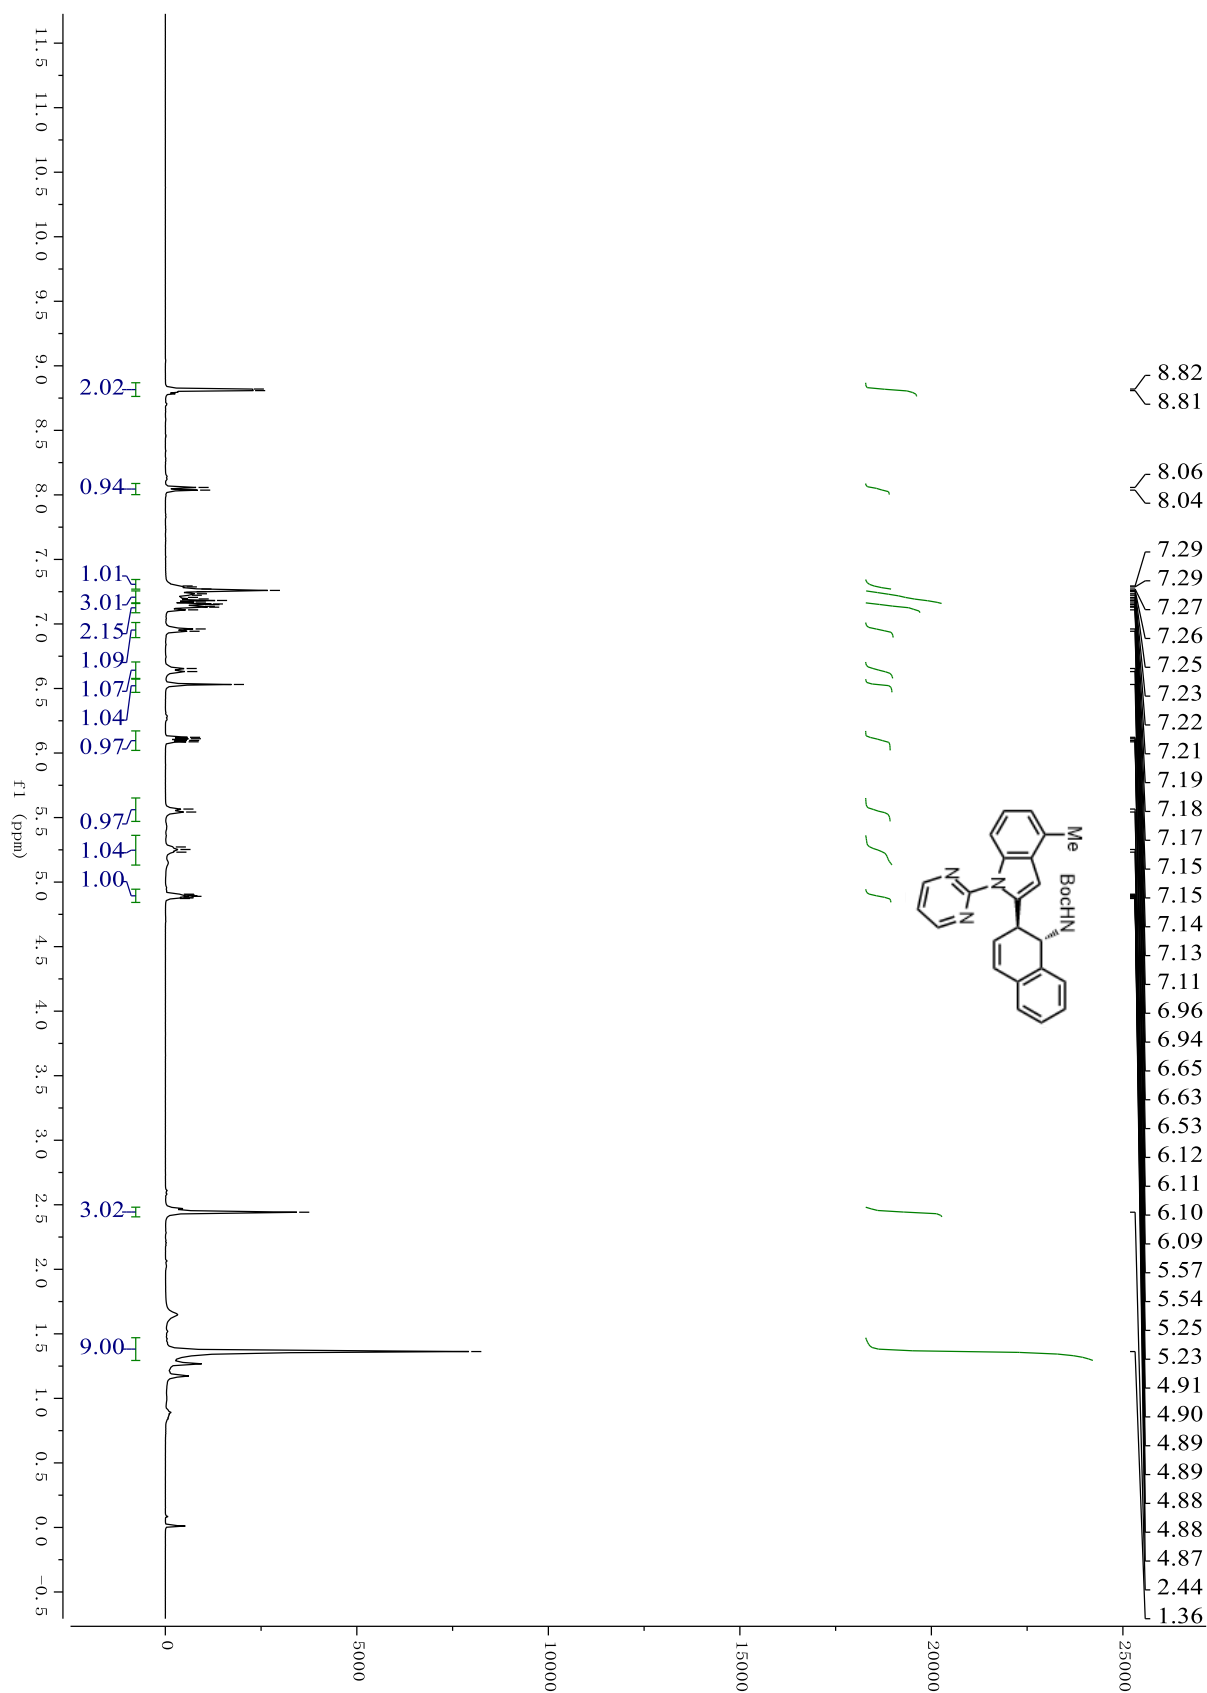

# SUPPLEMENTRAY INFORMATION

## Supplementary Fig. 107 <sup>13</sup>C NMR Spectrum of *trans*-7ad

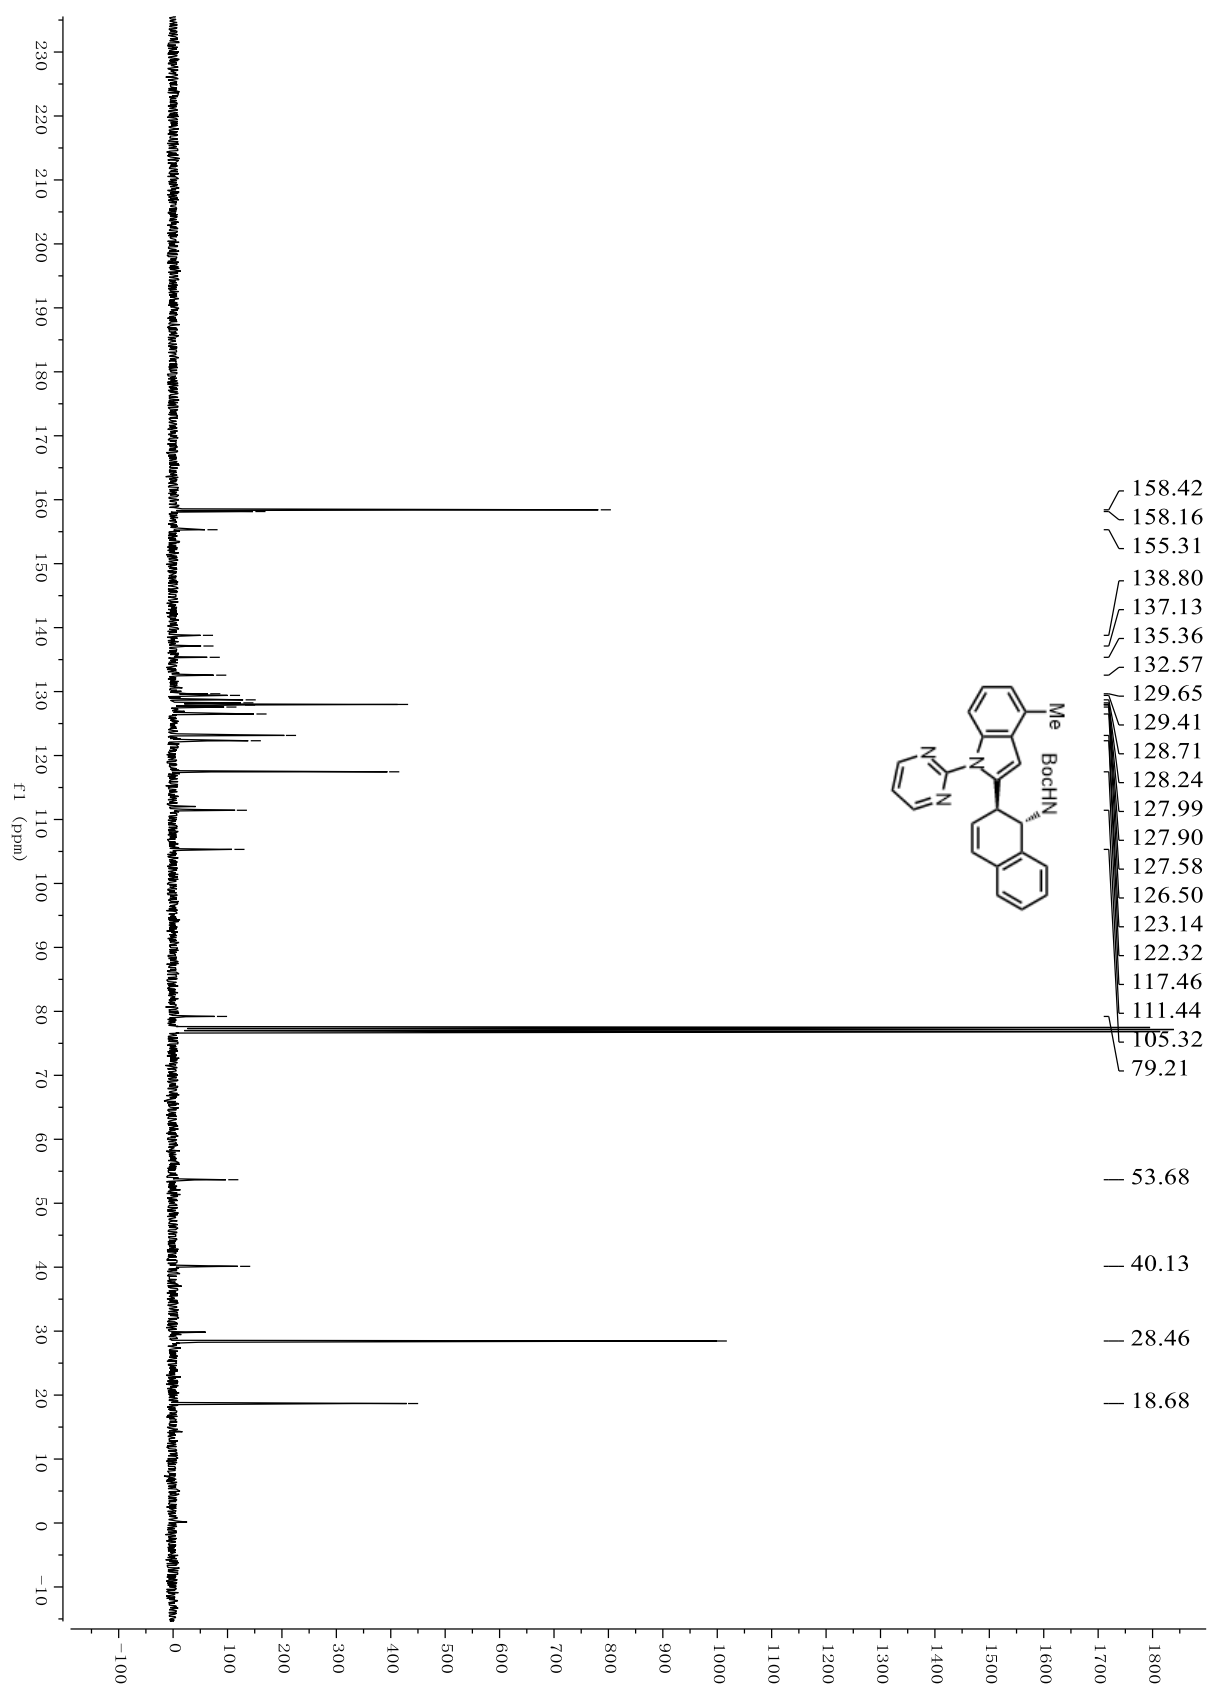

# SUPPLEMENTARY INFORMATION

**Supplementary Fig. 108**  $^1\text{H}$  NMR Spectrum of *trans*-7ae

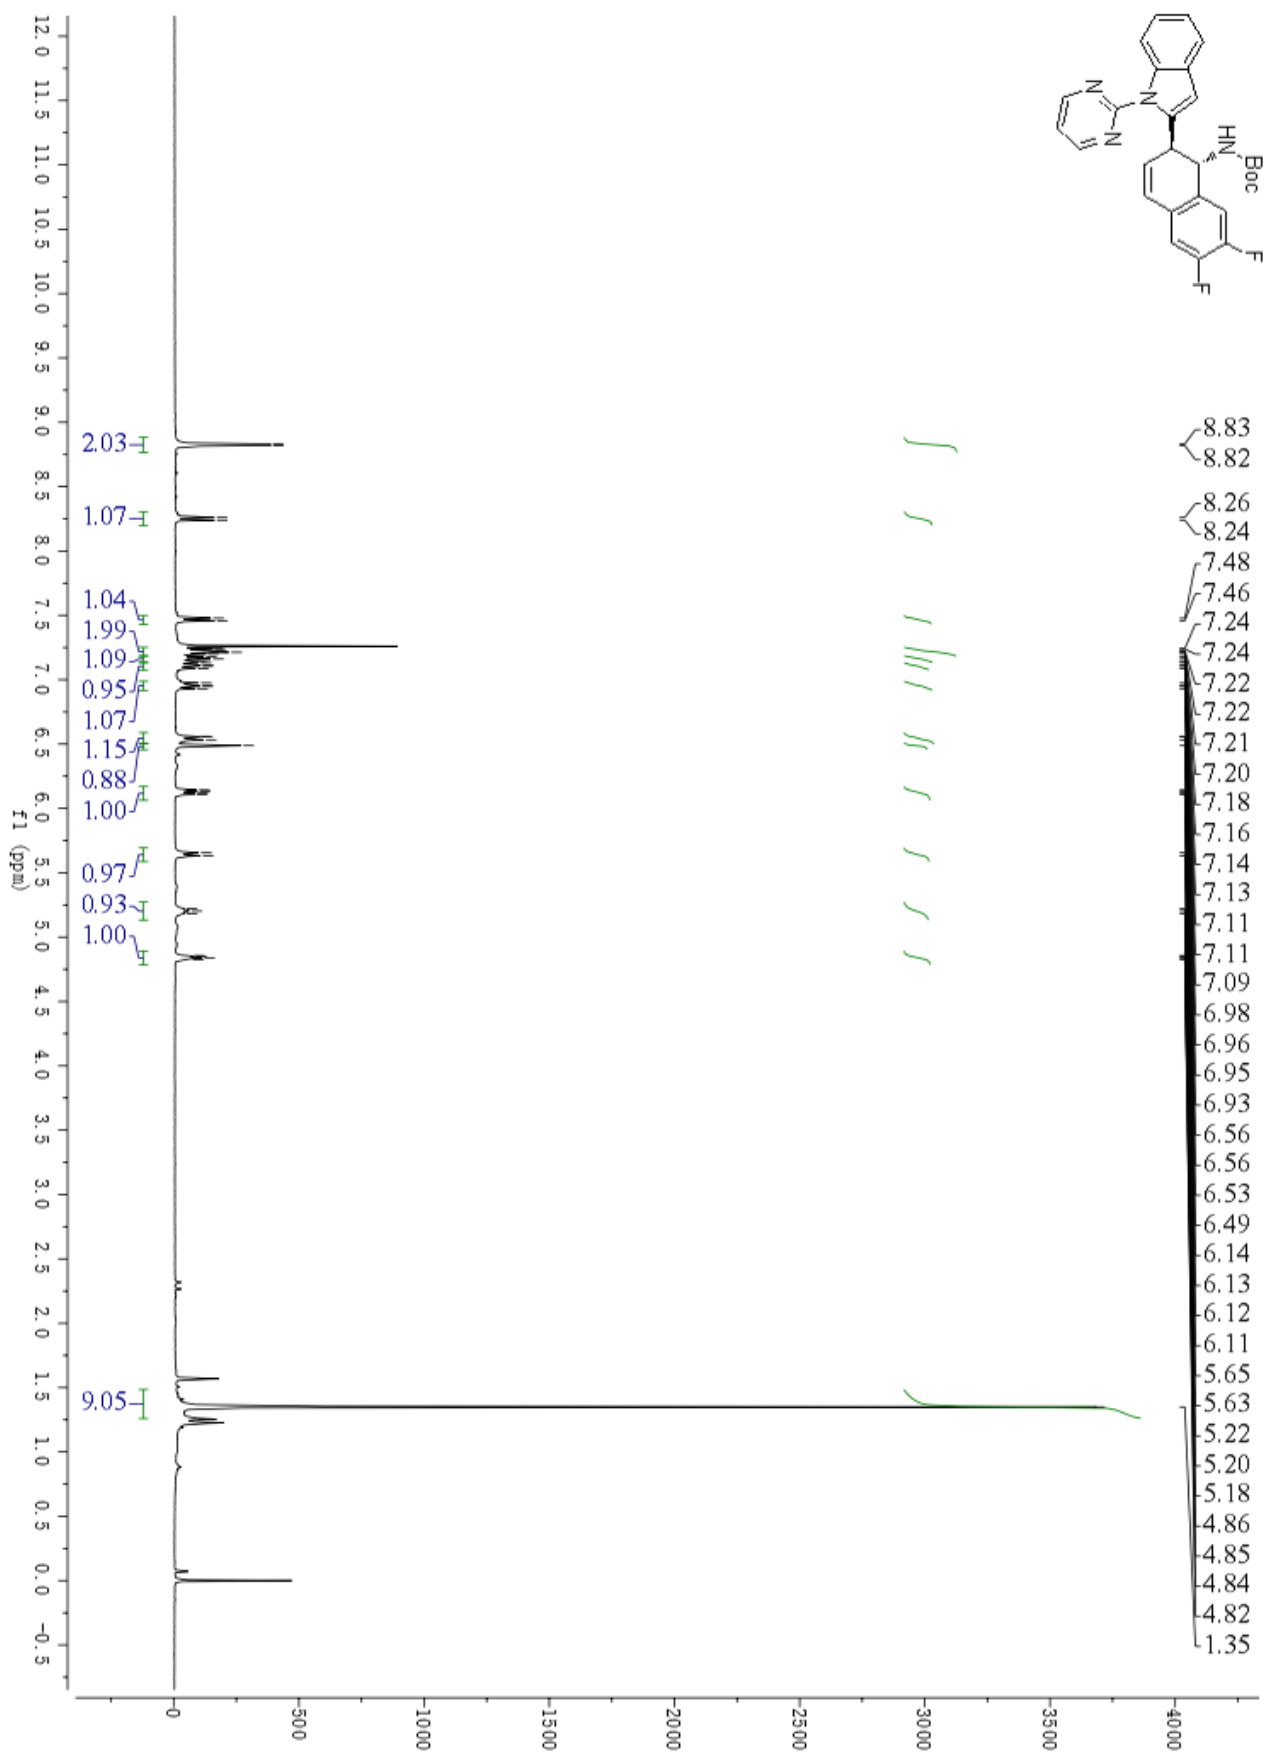

# SUPPLEMENTARY INFORMATION

**Supplementary Fig. 109**  $^{13}\text{C}$  NMR Spectrum of *trans*-7ae

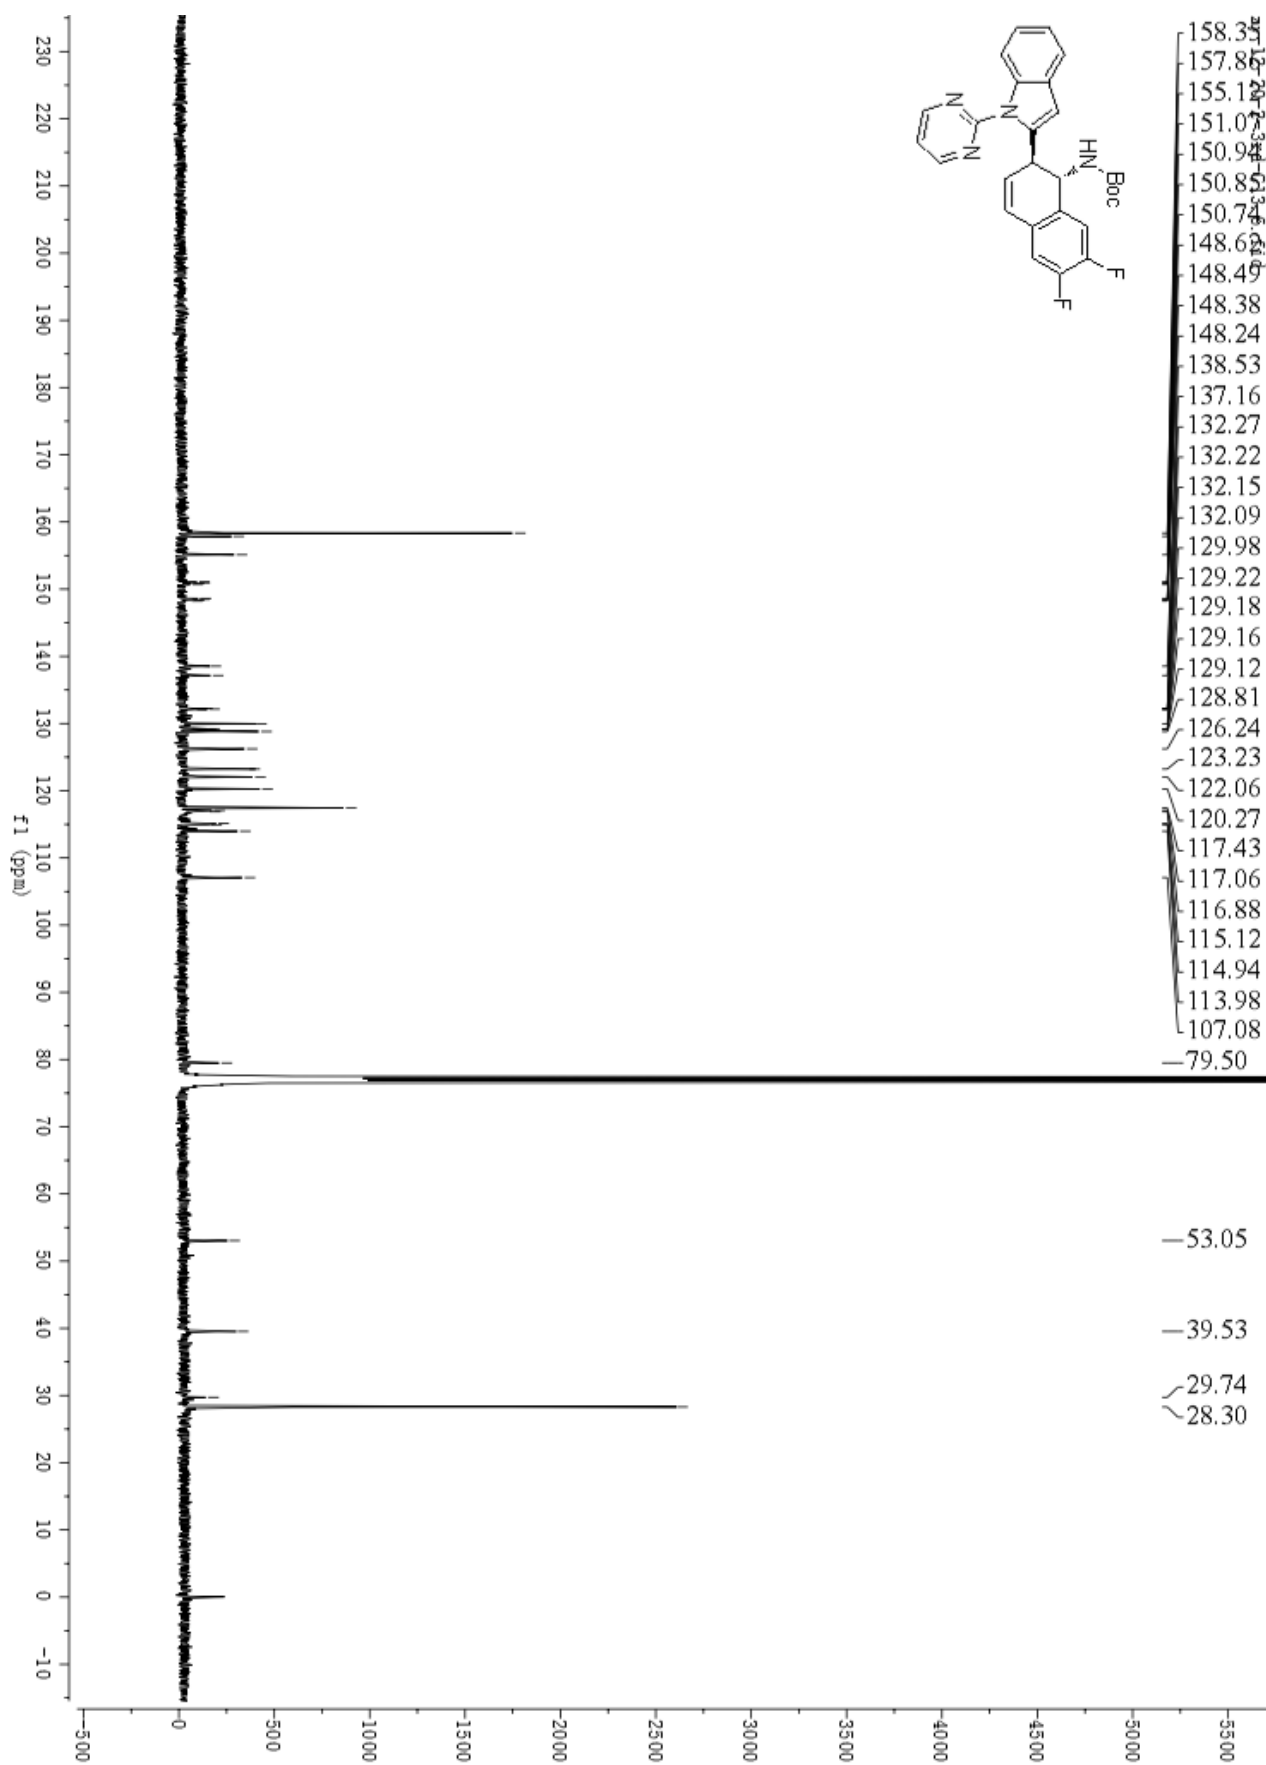



# SUPPLEMENTARY INFORMATION

Supplementary Fig. 110  $^{19}\text{F}$  NMR Spectrum of *trans*-7ae

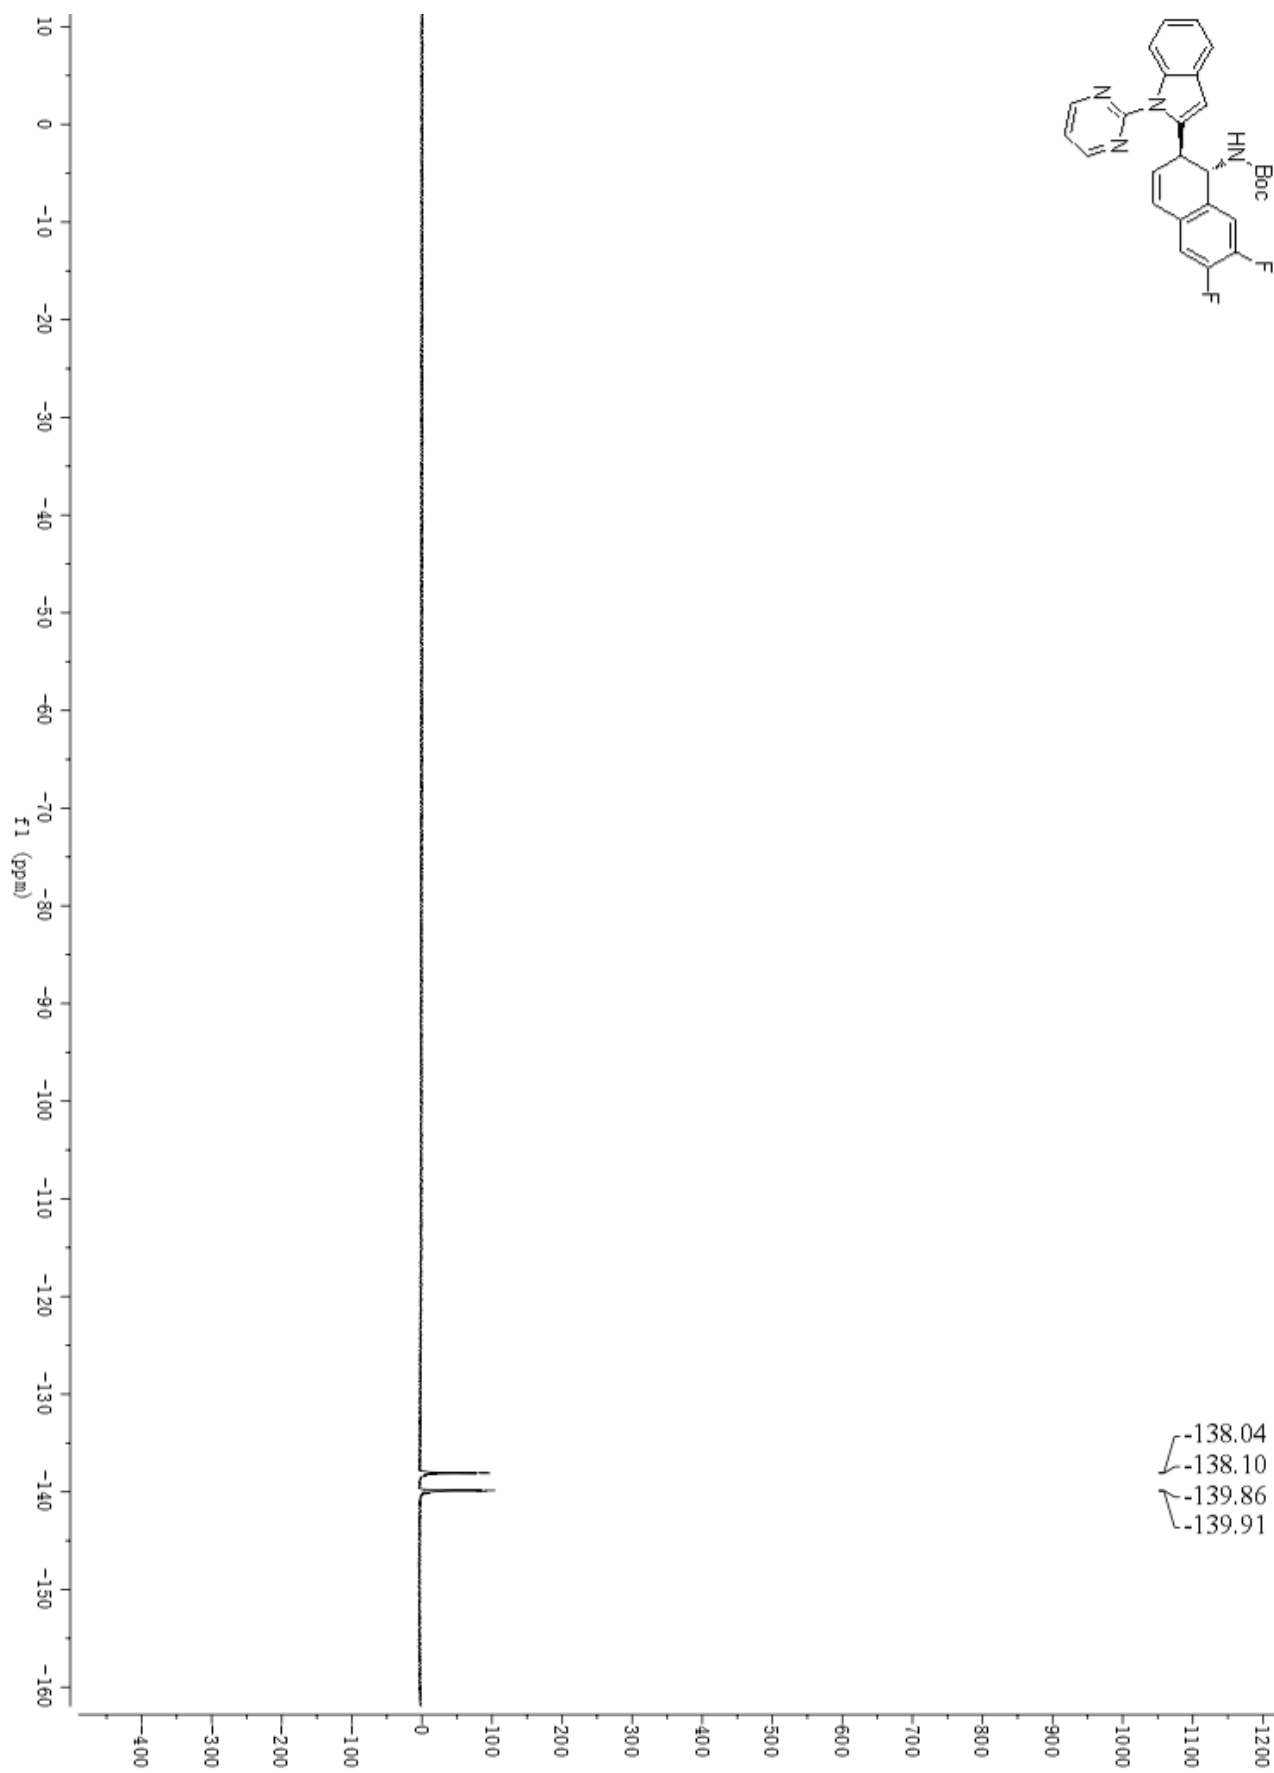

SUPPLEMENTARY INFORMATION

Supplementary Fig. 111 <sup>1</sup>H NMR Spectrum of *trans*-7af

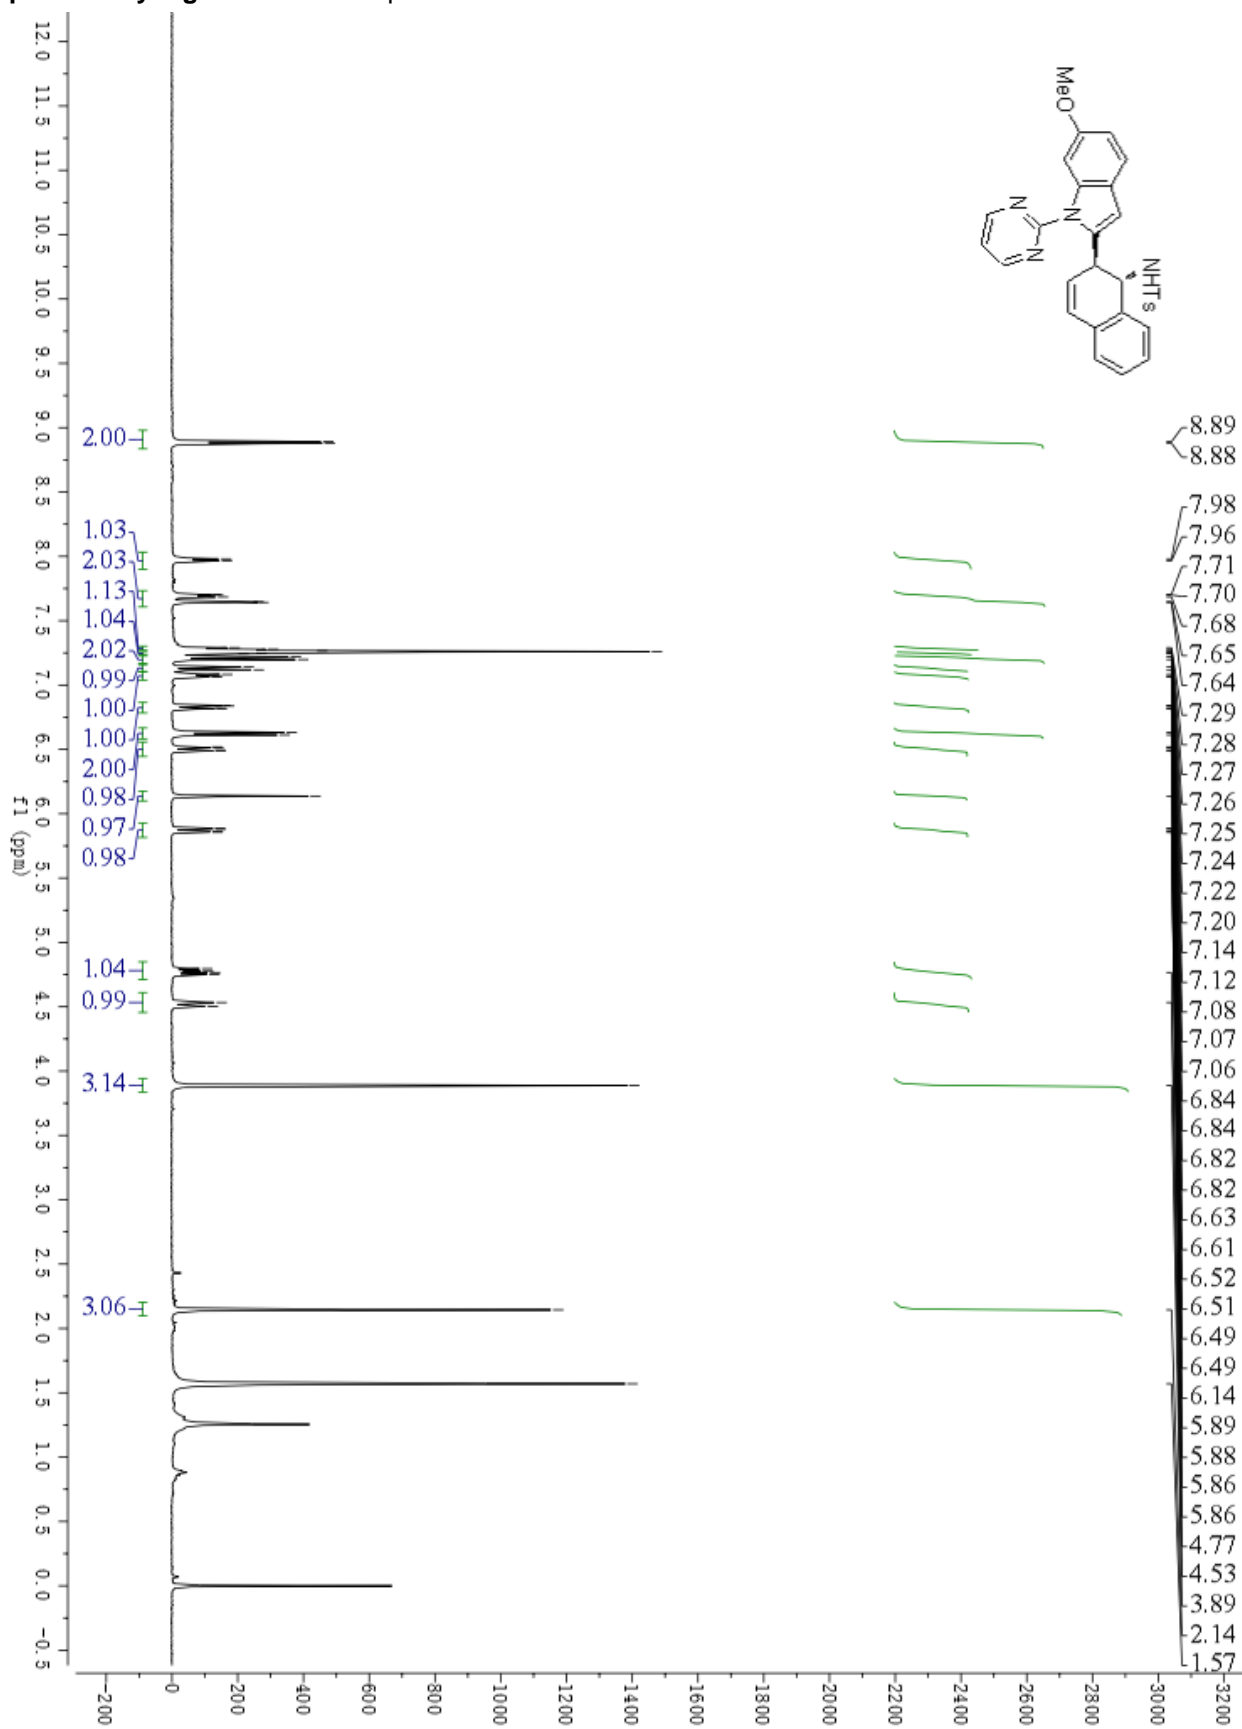

# SUPPLEMENTARY INFORMATION

Supplementary Fig. 112 <sup>13</sup>C NMR Spectrum of *trans*-7af

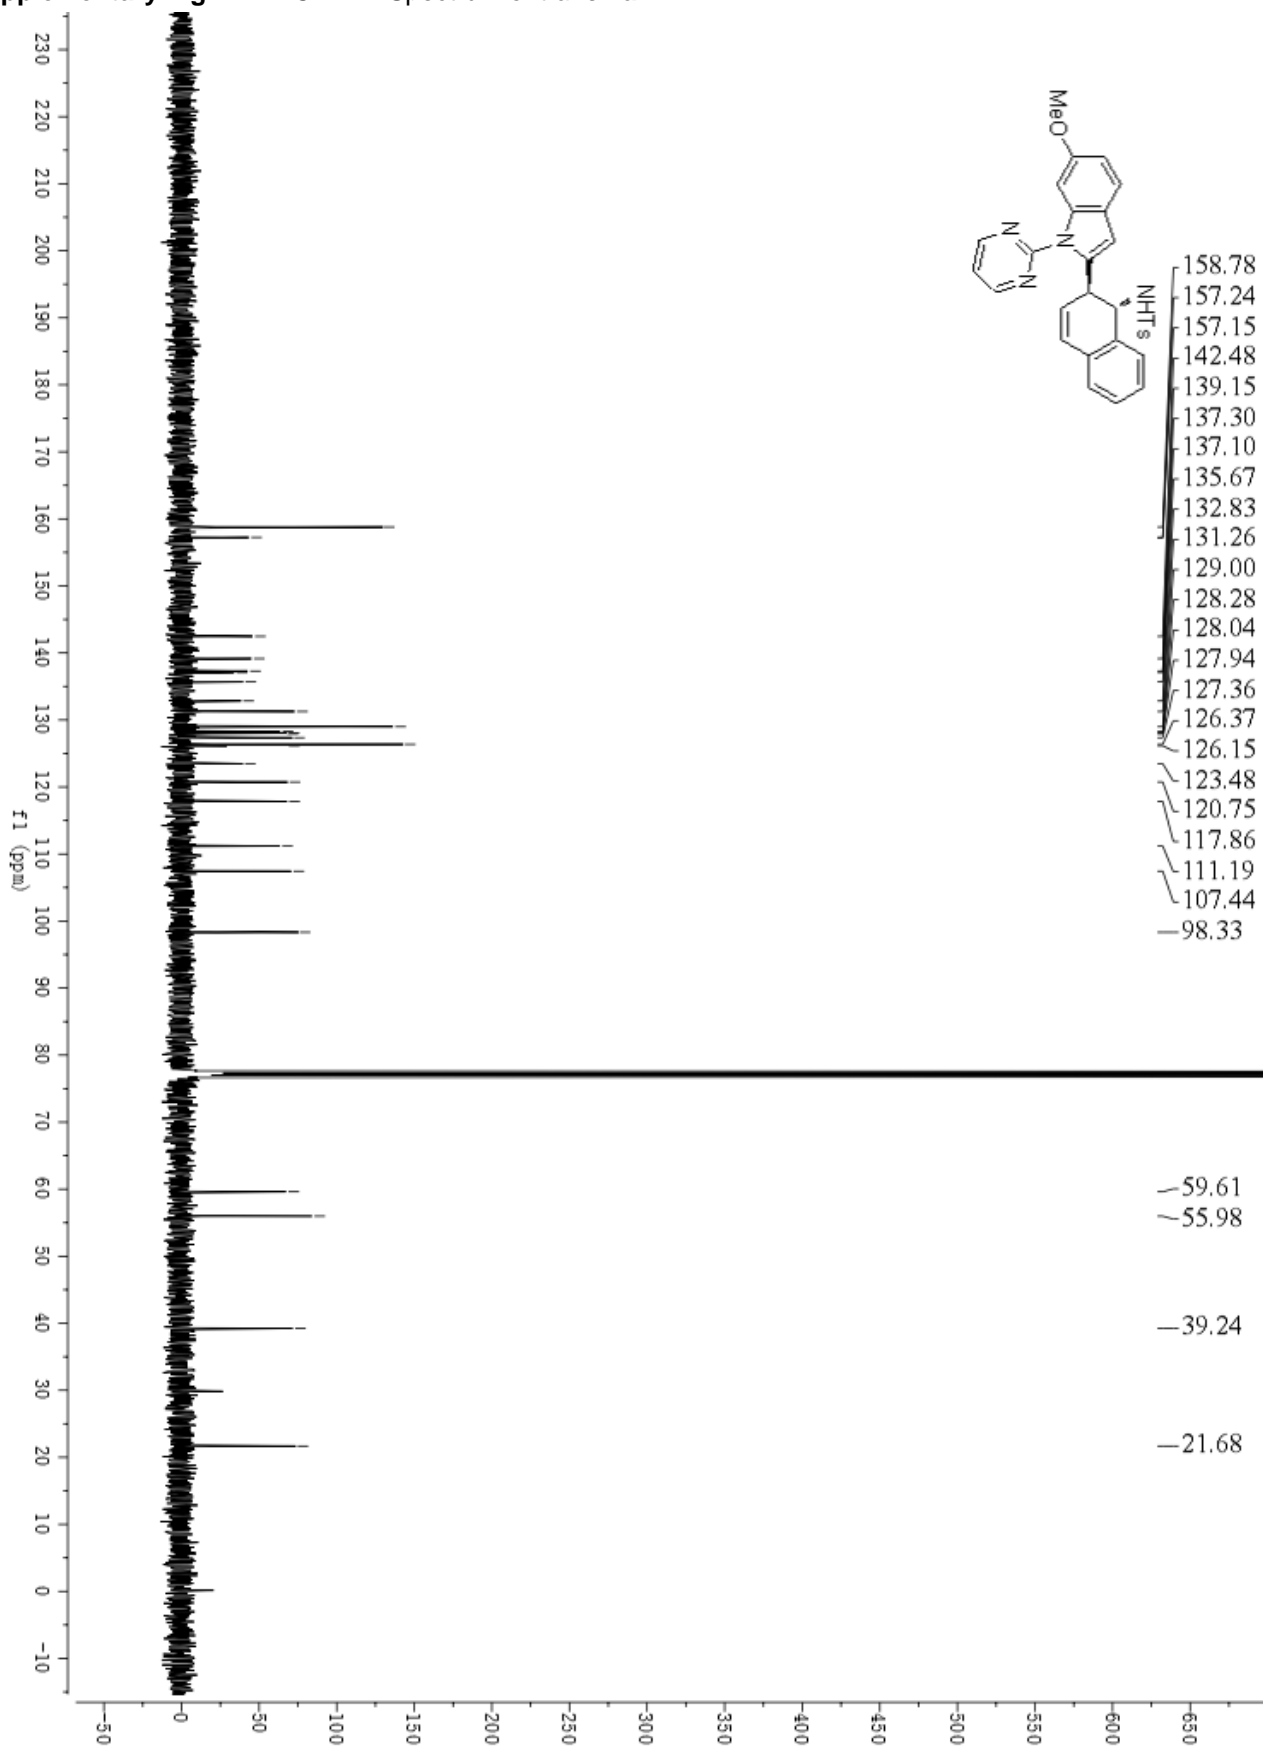

# SUPPLEMENTARY INFORMATION

**Supplementary Fig. 113**  $^1\text{H}$  NMR Spectrum of **4**

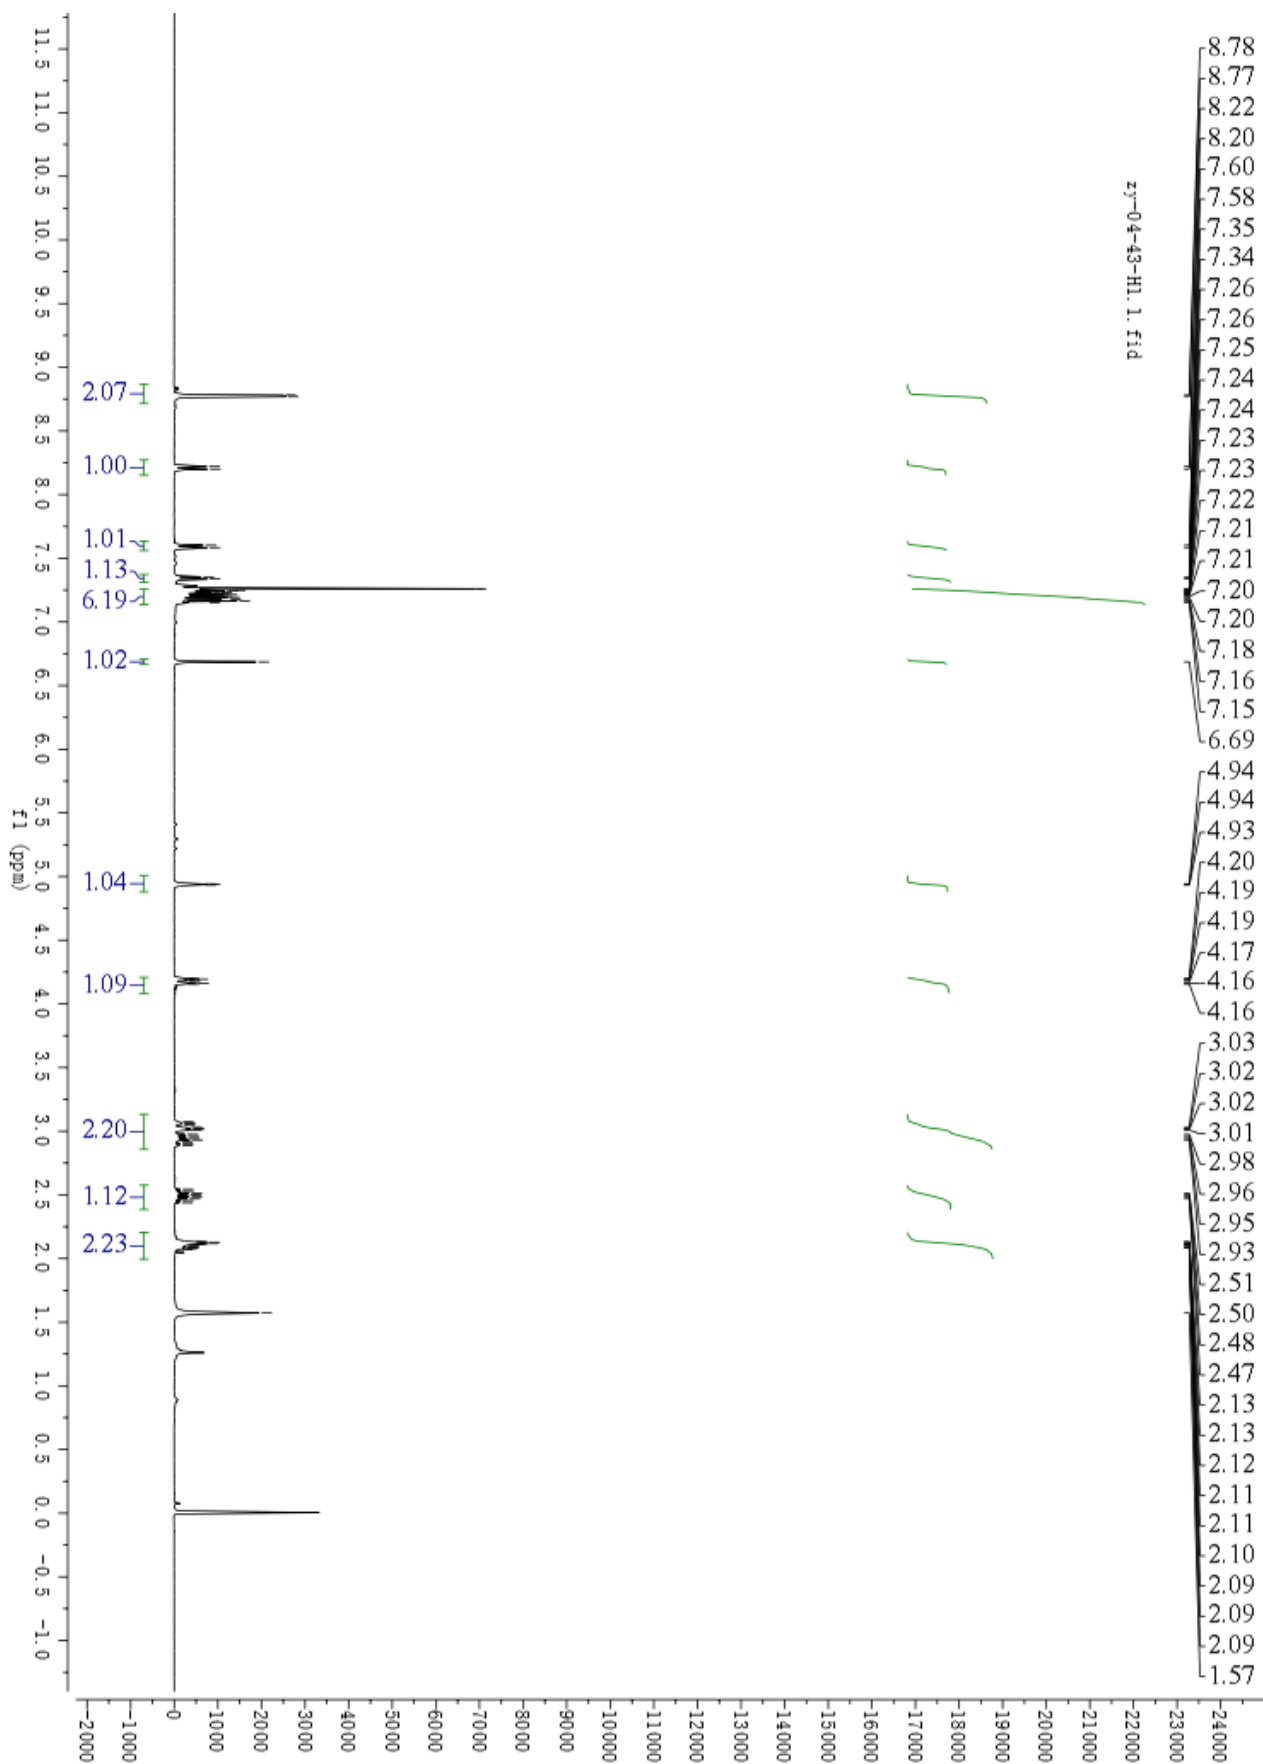

# SUPPLEMENTARY INFORMATION

Supplementary Fig. 114  $^{13}\text{C}$  NMR Spectrum of 4

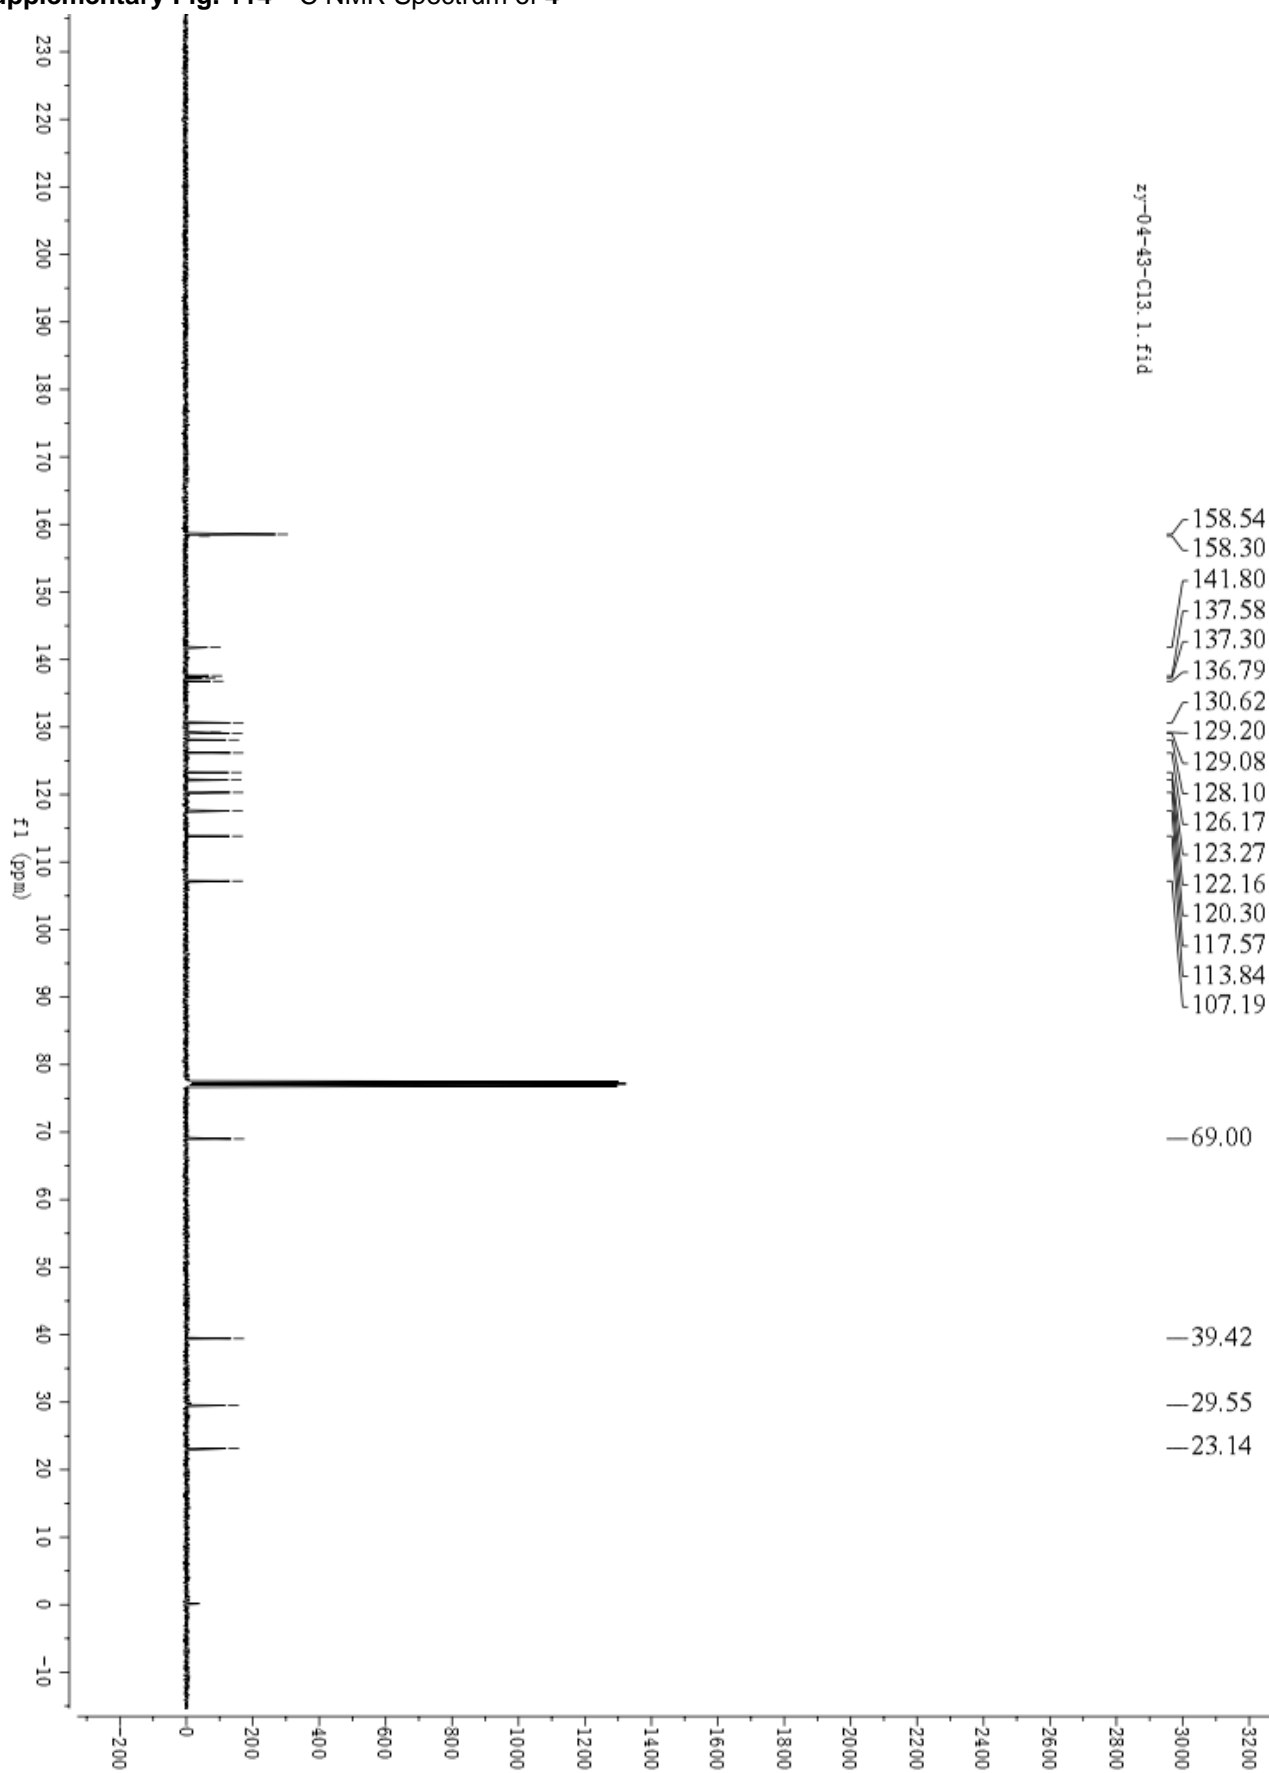

# SUPPLEMENTARY INFORMATION

Supplementary Fig. 115 <sup>1</sup>H NMR Spectrum of 5

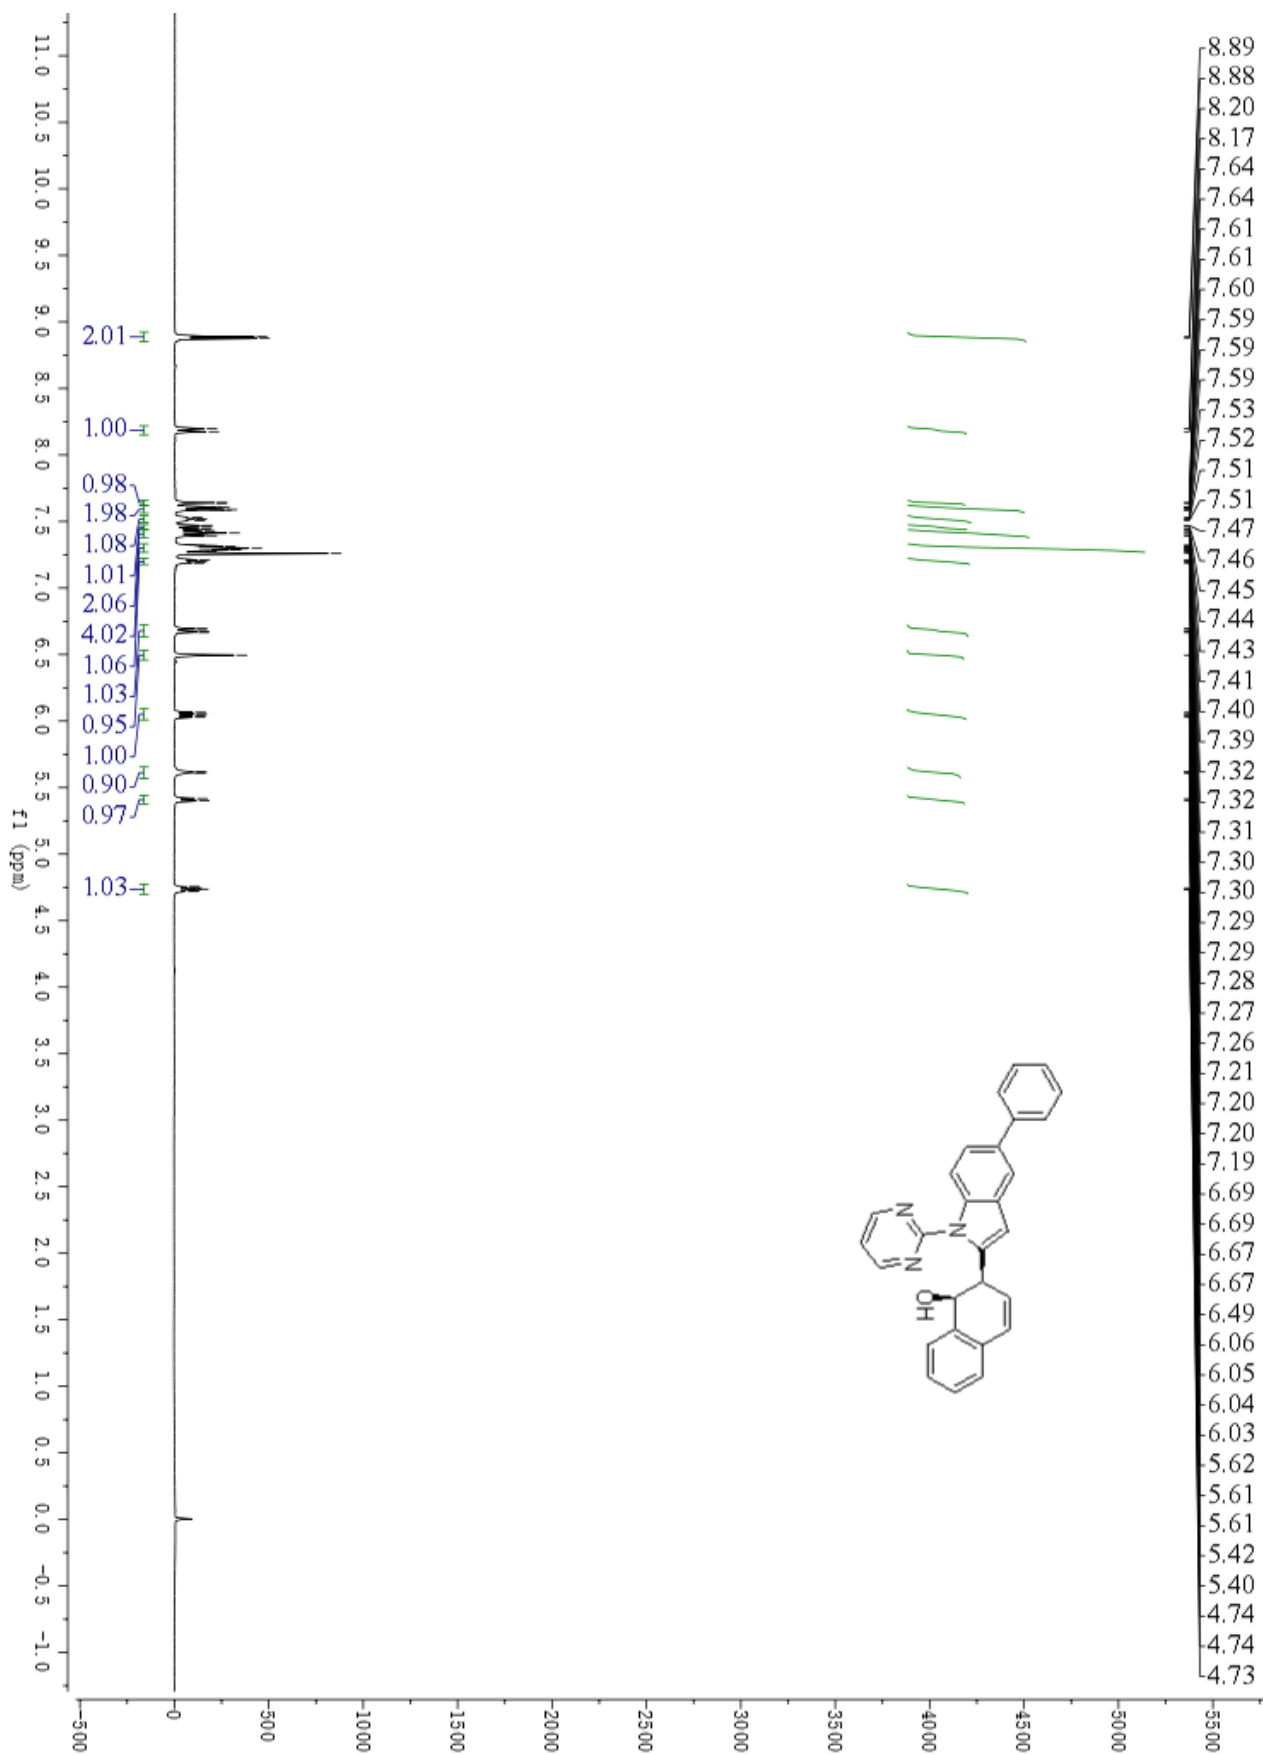

# SUPPLEMENTARY INFORMATION

Supplementary Fig. 116 <sup>13</sup>C NMR Spectrum of 5

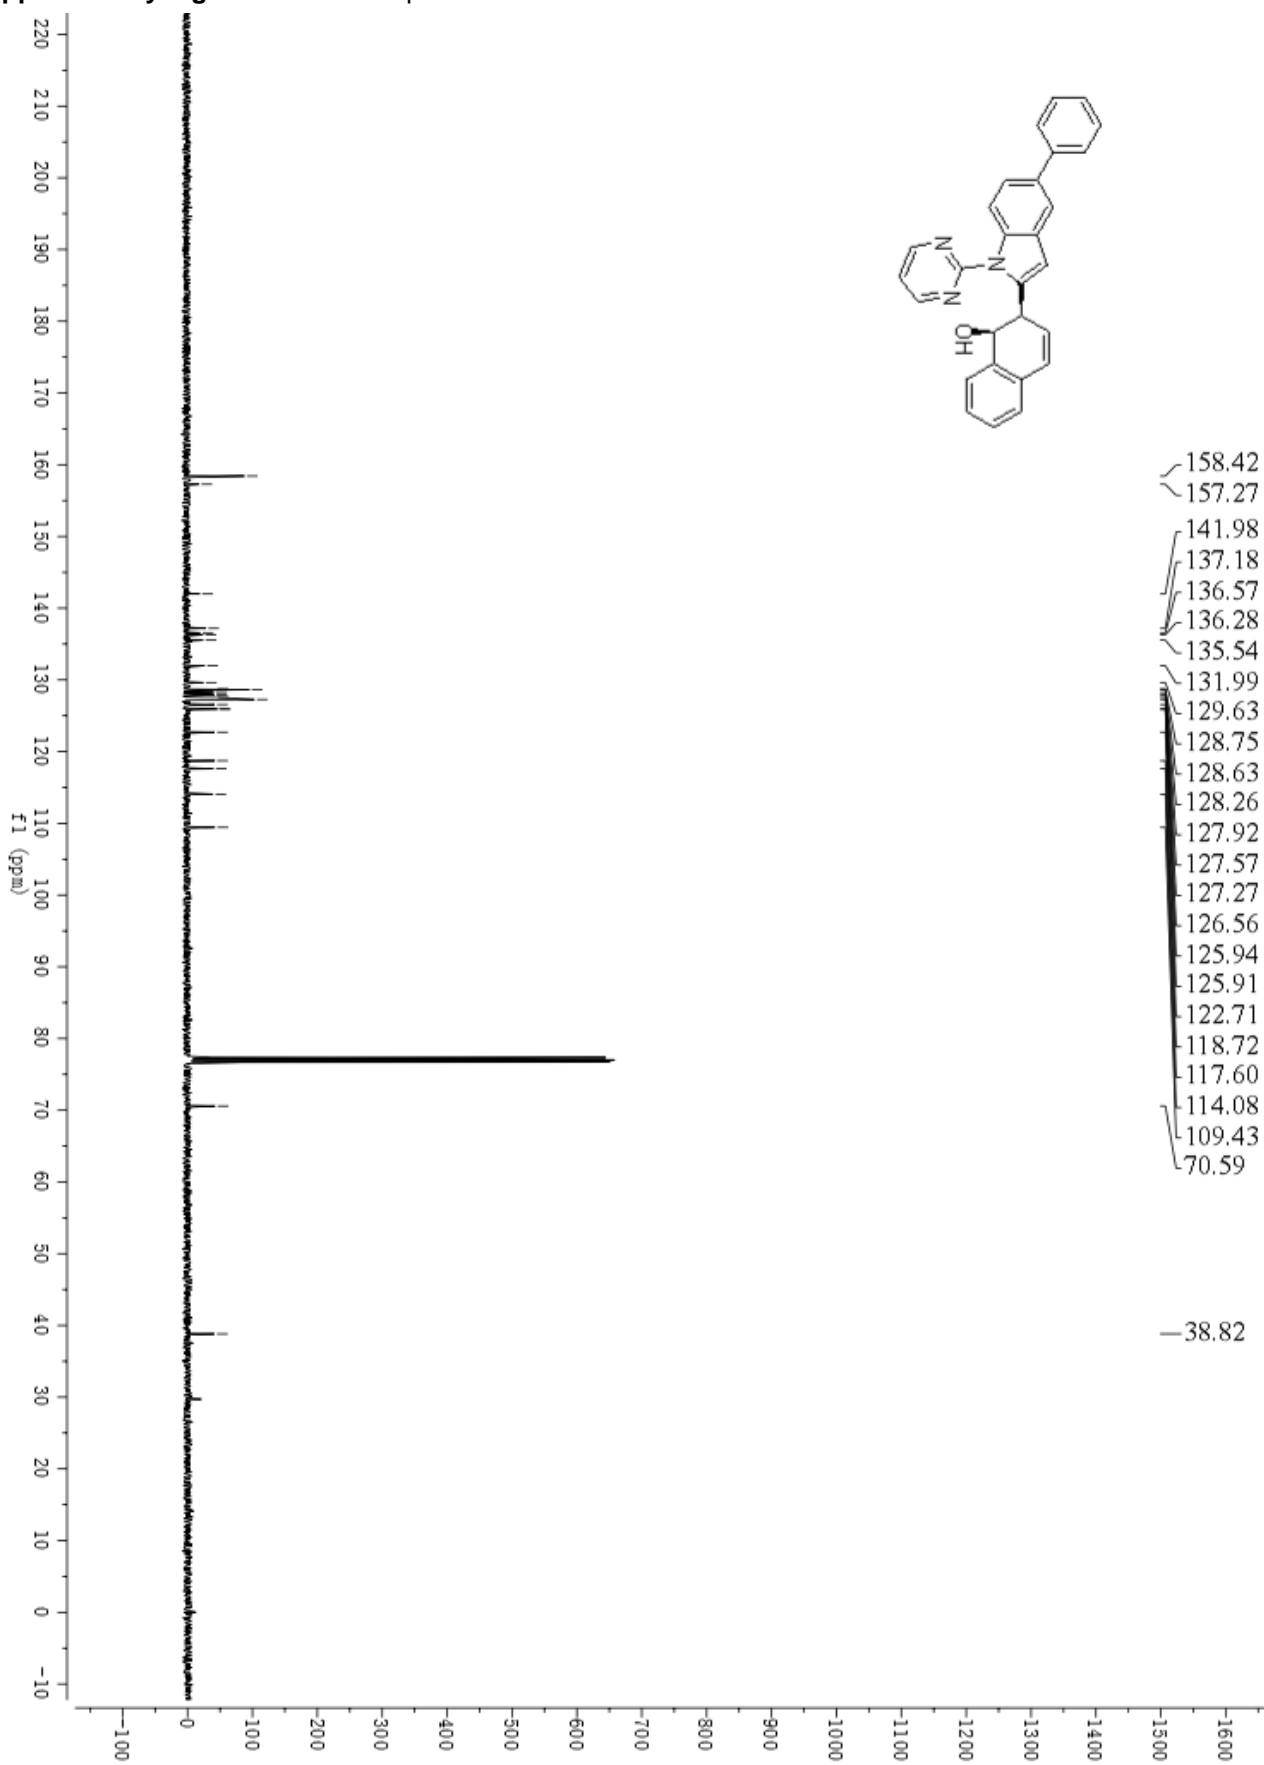

# SUPPLEMENTARY INFORMATION

Supplementary Fig. 117 <sup>1</sup>H NMR Spectrum of 8

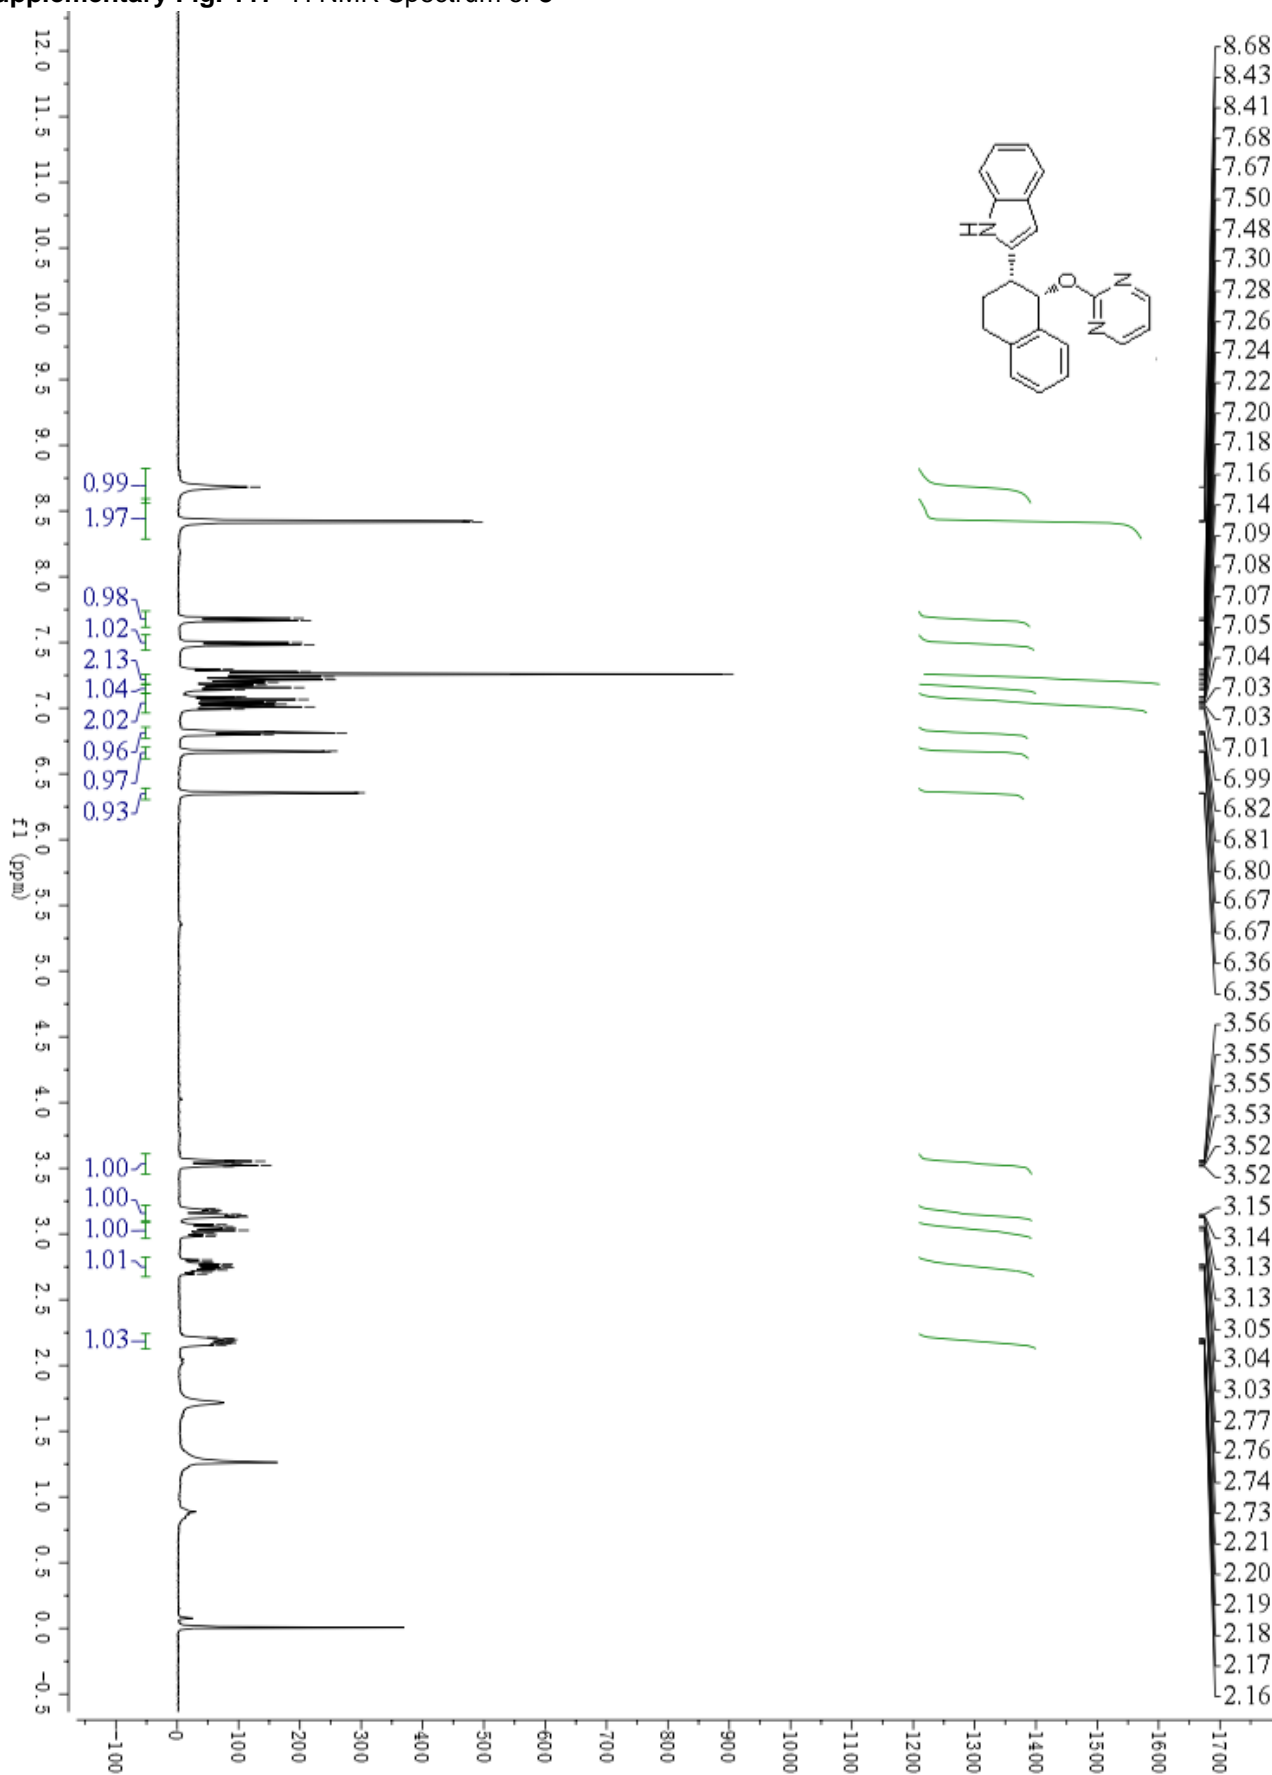



# SUPPLEMENTARY INFORMATION

Supplementary Fig. 118 <sup>1</sup>H NMR Spectrum of **8**

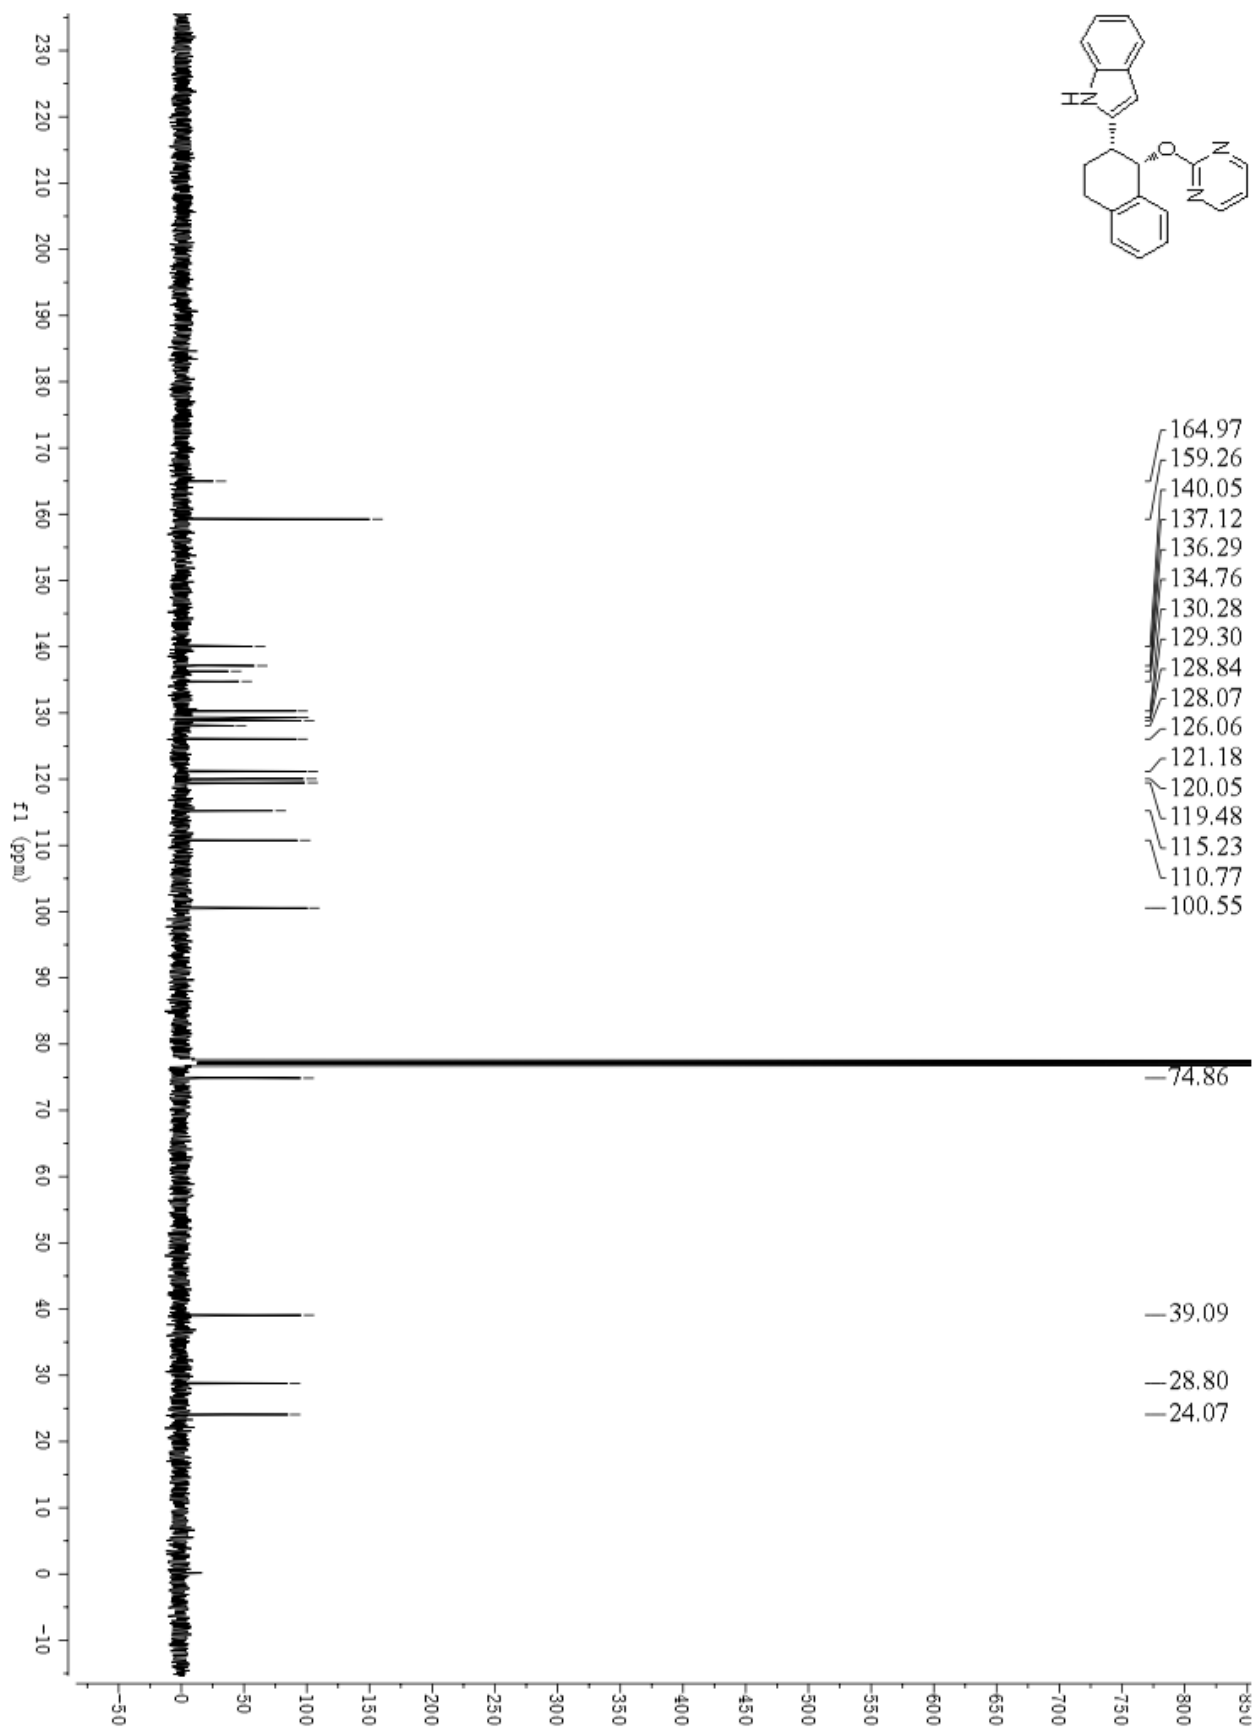

# SUPPLEMENTRAY INFORMATION

## 1.10 Copies of HPLC chromatograms

Supplementary Fig. 119 HPLC analysis of *cis*-3aa

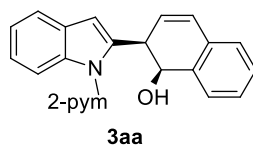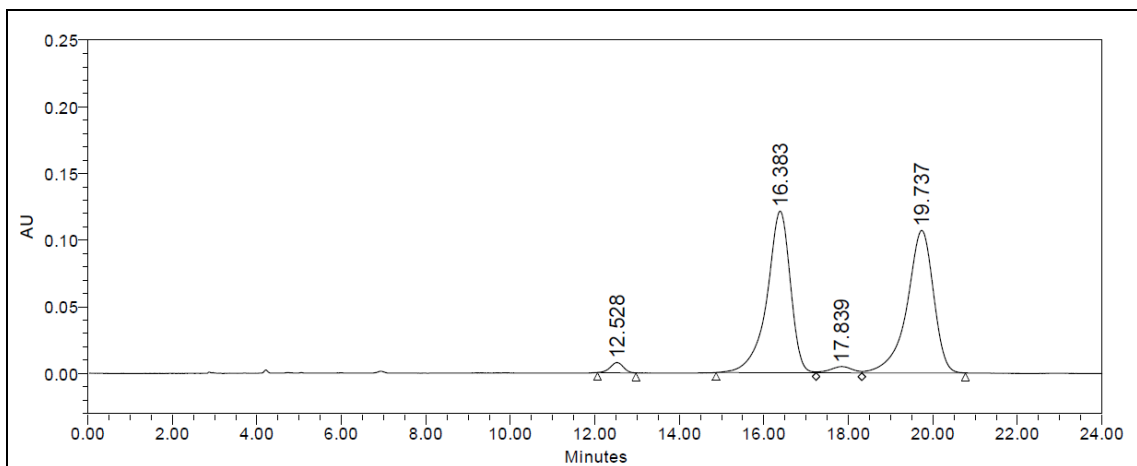

|   | RT     | Area    | % Area | Height |
|---|--------|---------|--------|--------|
| 1 | 12.528 | 164511  | 1.70   | 7621   |
| 2 | 16.383 | 4669008 | 48.33  | 121259 |
| 3 | 17.839 | 167370  | 1.73   | 4703   |
| 4 | 19.737 | 4659366 | 48.23  | 106898 |

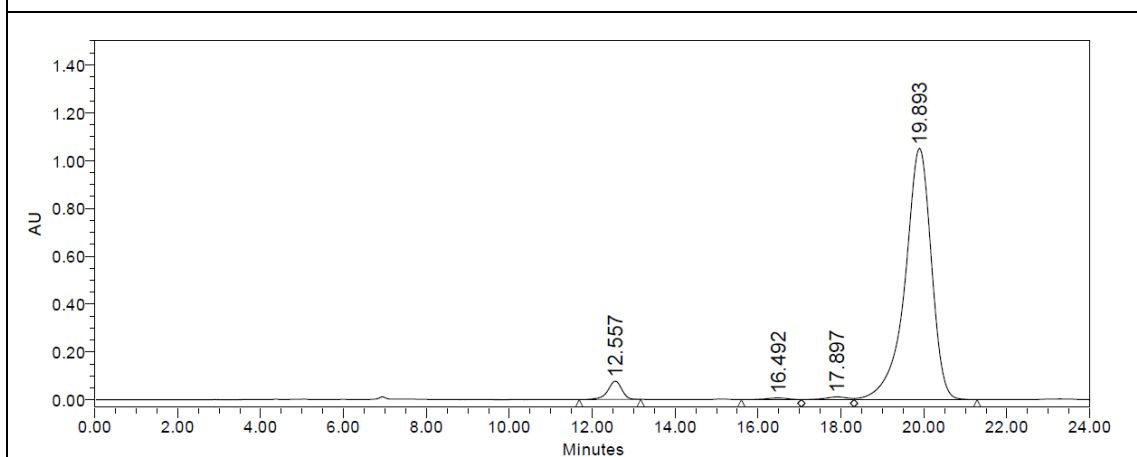

|   | RT     | Area     | % Area | Height  |
|---|--------|----------|--------|---------|
| 1 | 12.557 | 1789953  | 3.67   | 76744   |
| 2 | 16.492 | 239879   | 0.49   | 6756    |
| 3 | 17.897 | 401542   | 0.82   | 10984   |
| 4 | 19.893 | 46301329 | 95.01  | 1049900 |

# SUPPLEMENTRAY INFORMATION

## Supplementary Fig. 120 HPLC analysis of *cis*-3ba

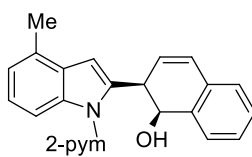

**3ba**

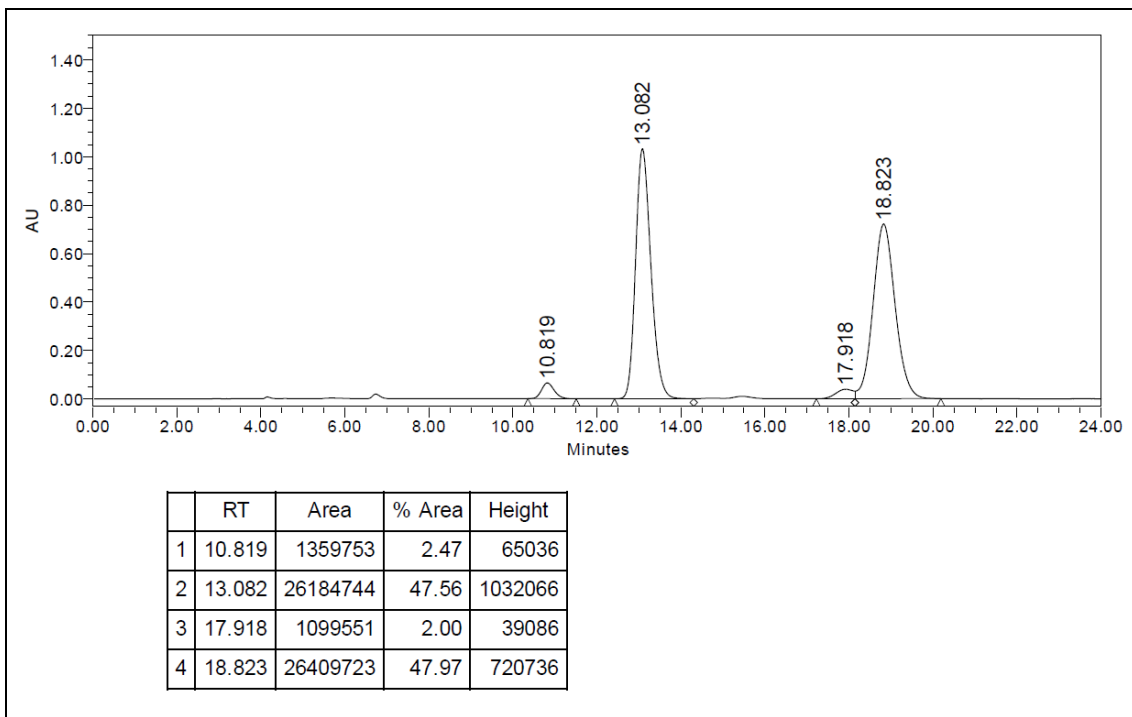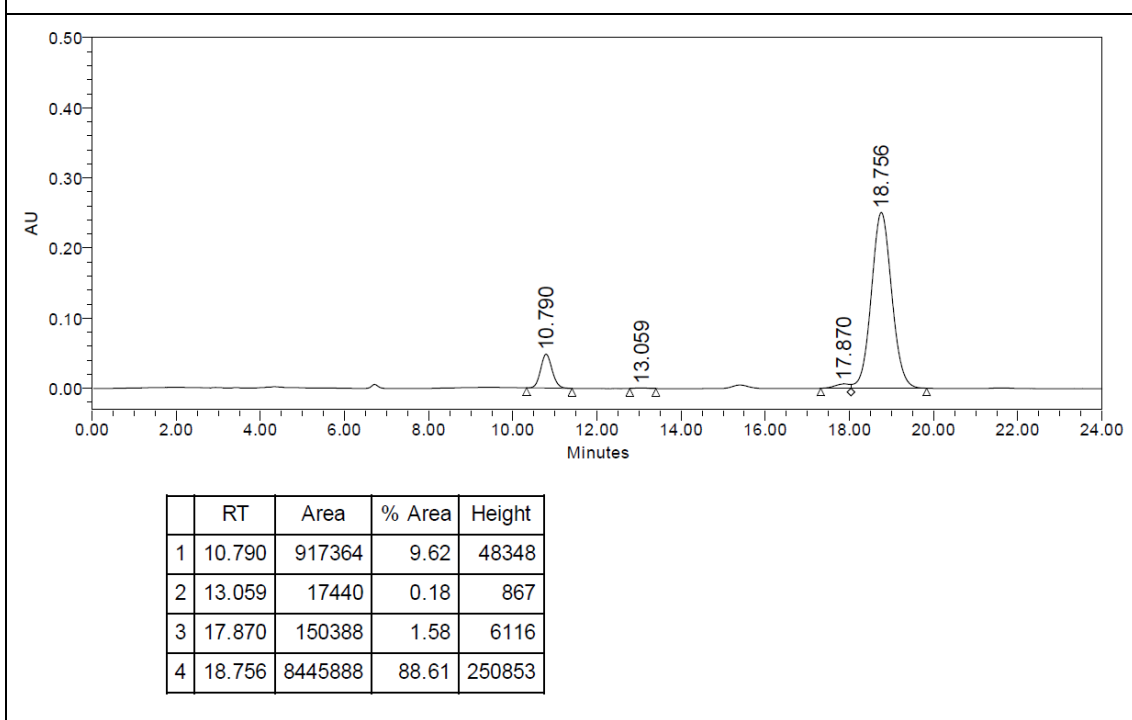

# SUPPLEMENTRAY INFORMATION

**Supplementary Fig. 121** HPLC analysis of *cis*-**3ca**

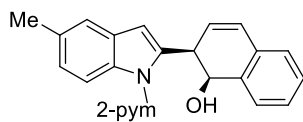

**3ca**

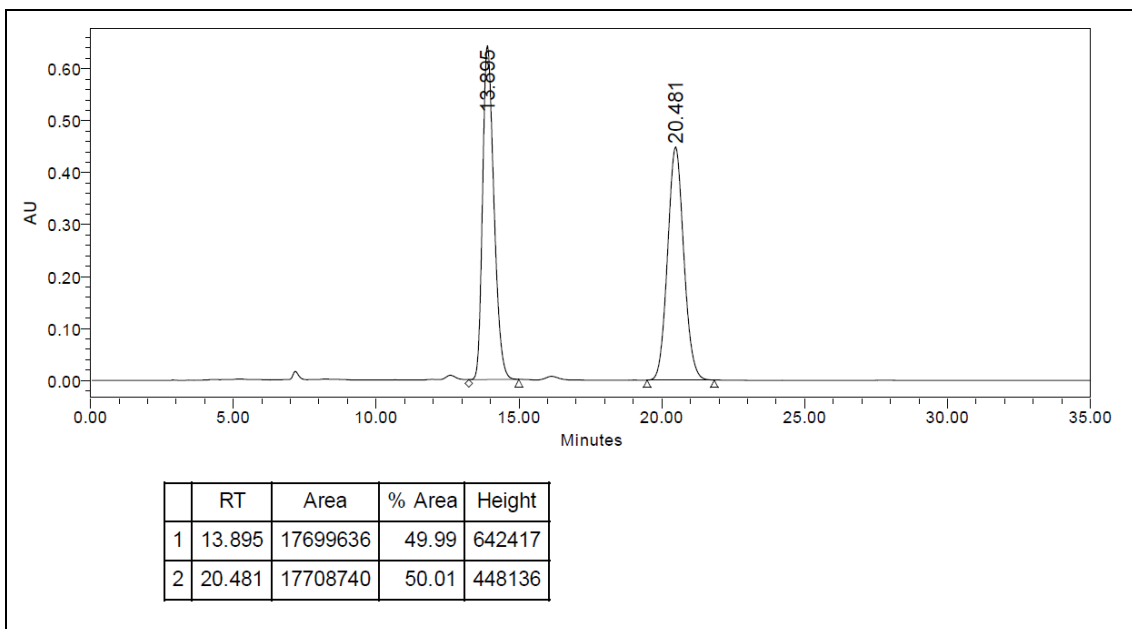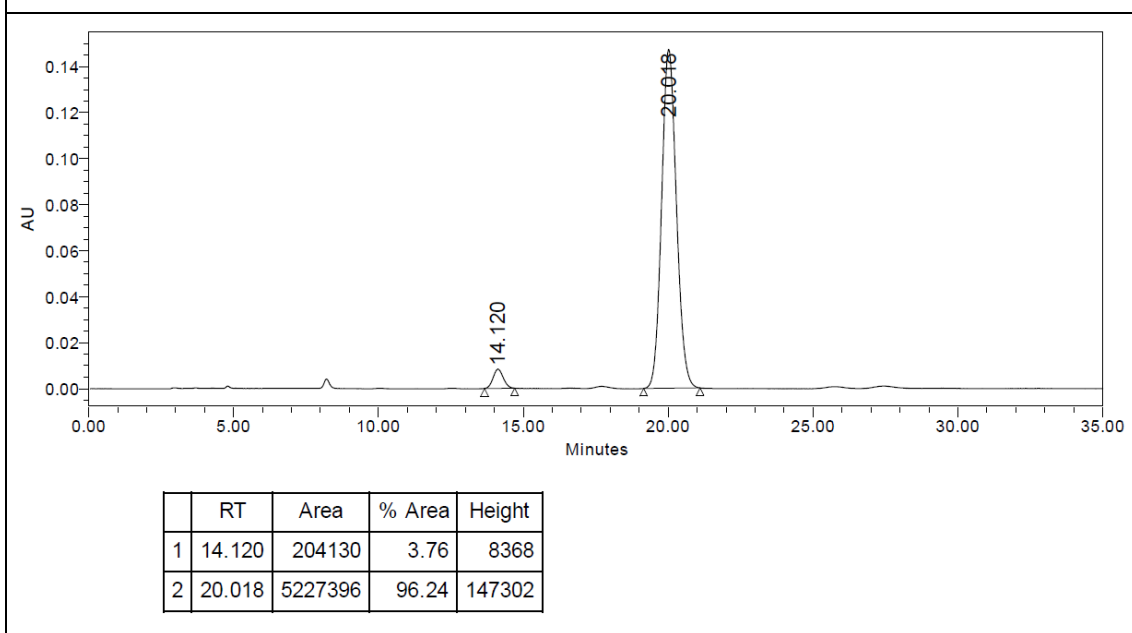

# SUPPLEMENTRAY INFORMATION

**Supplementary Fig. 122** HPLC analysis of *cis*-3da

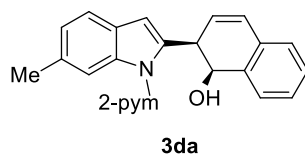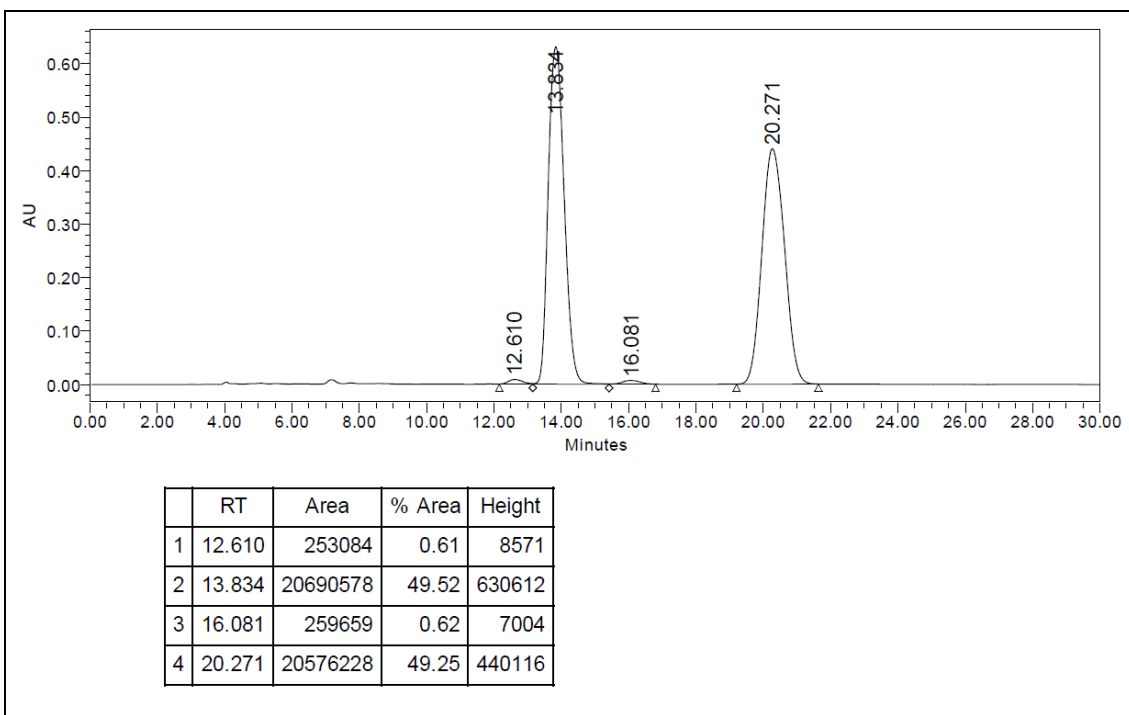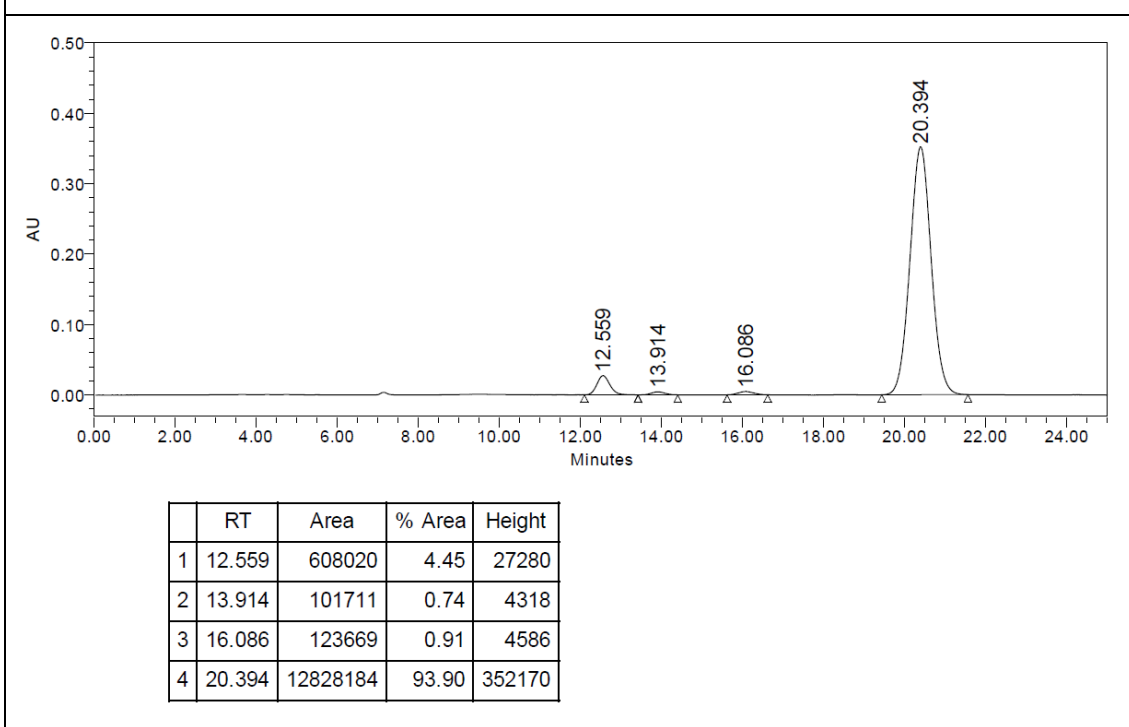

# SUPPLEMENTRAY INFORMATION

## Supplementary Fig. 123 HPLC analysis of *cis*-3ea

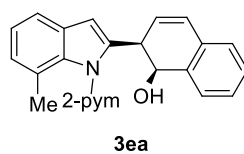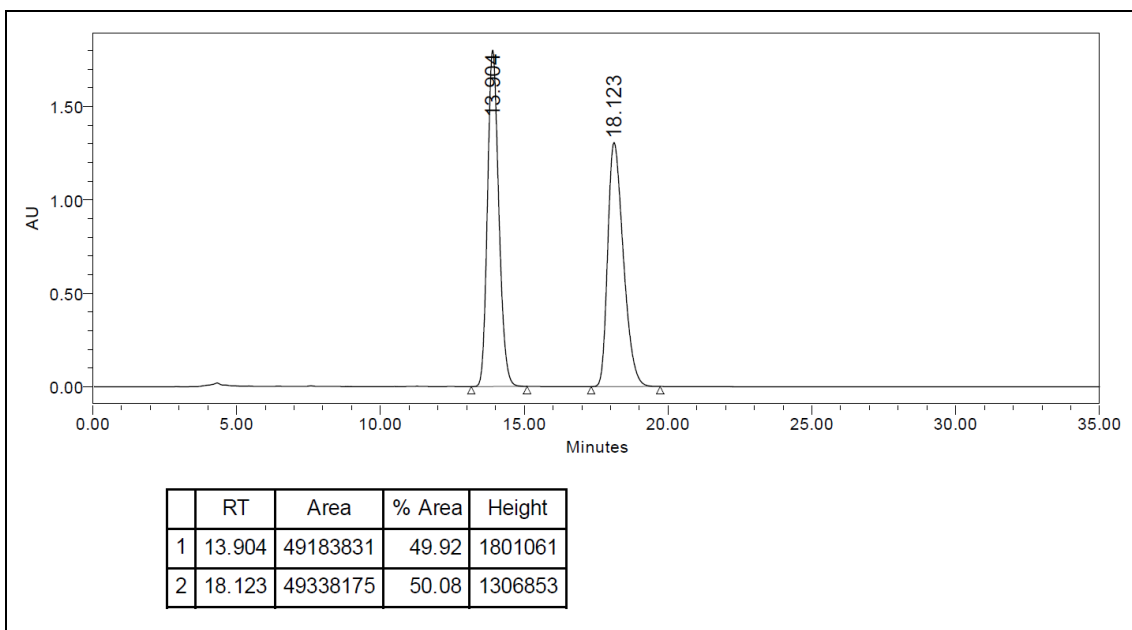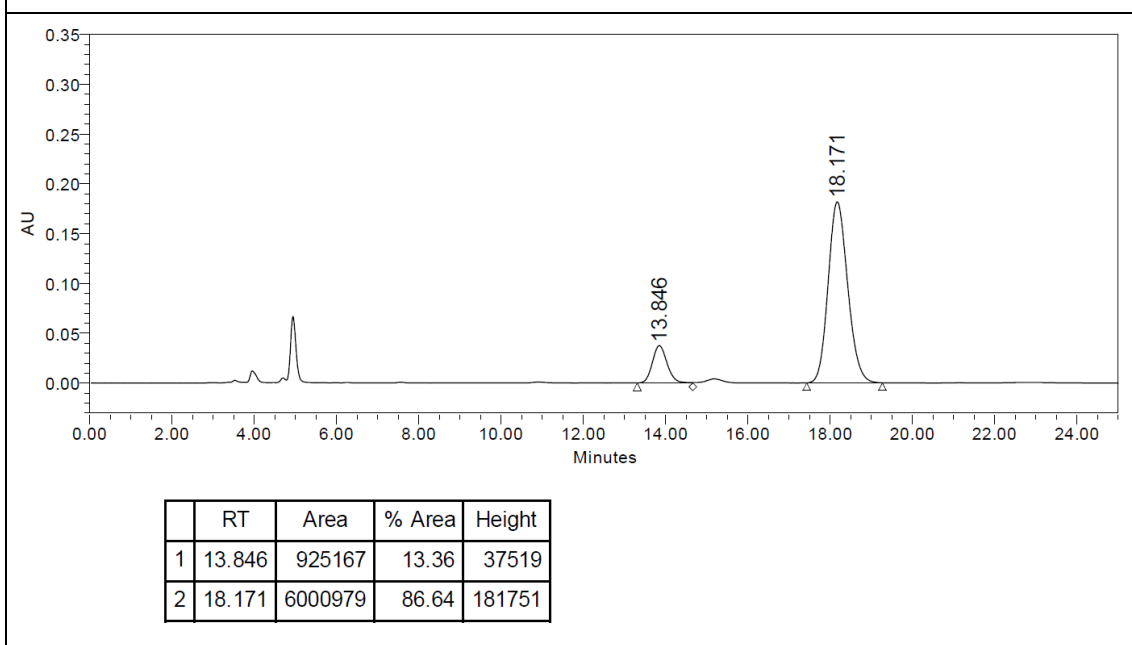

# SUPPLEMENTRAY INFORMATION

**Supplementary Fig. 124** HPLC analysis of *cis*-**3fa**

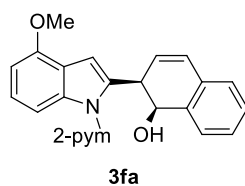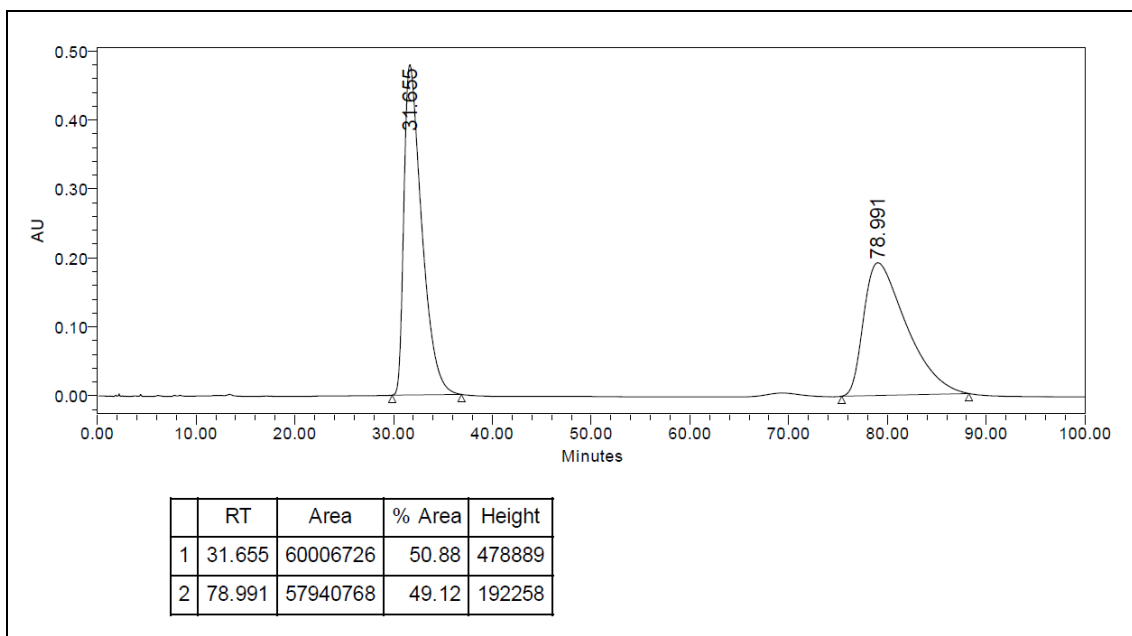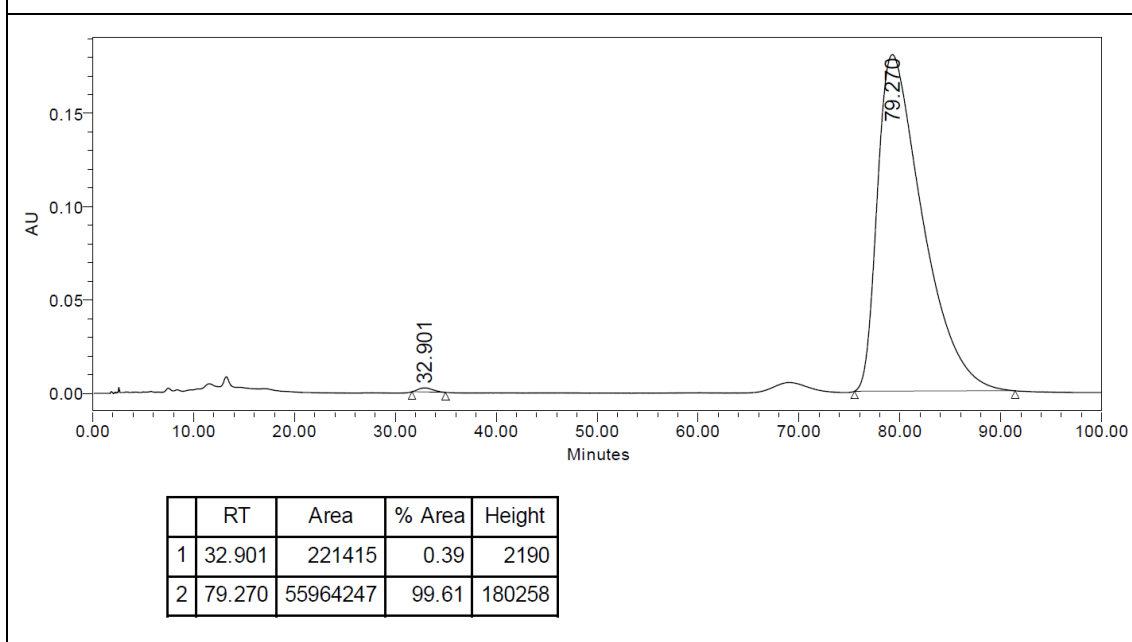

# SUPPLEMENTRAY INFORMATION

## Supplementary Fig. 125 HPLC analysis of *cis*-3ga

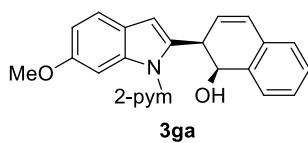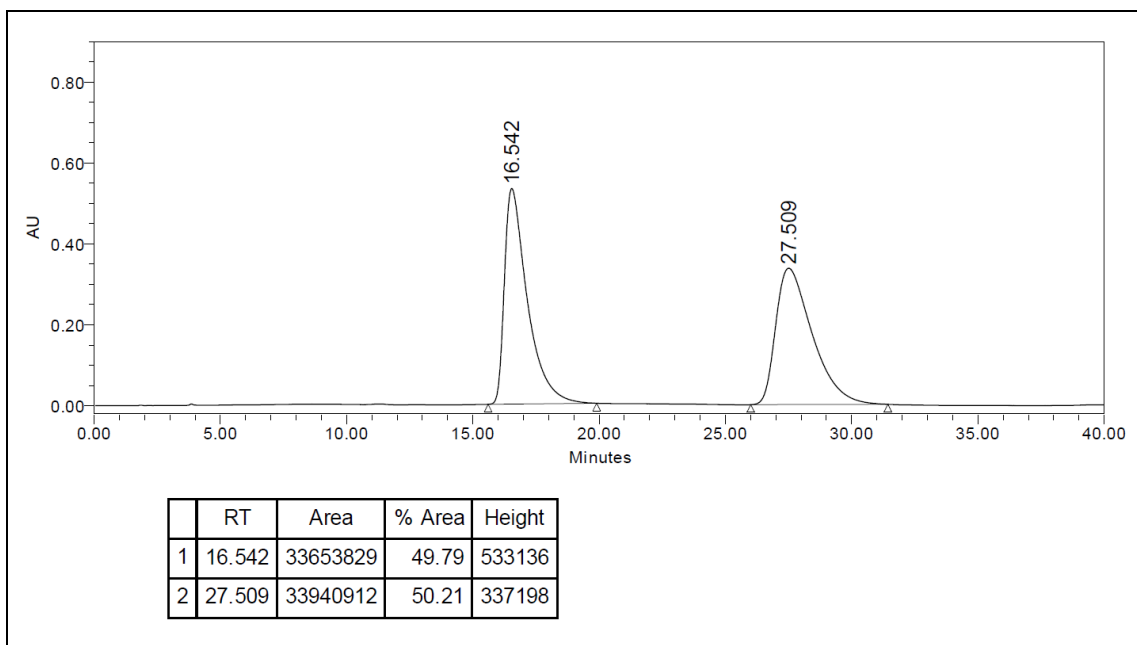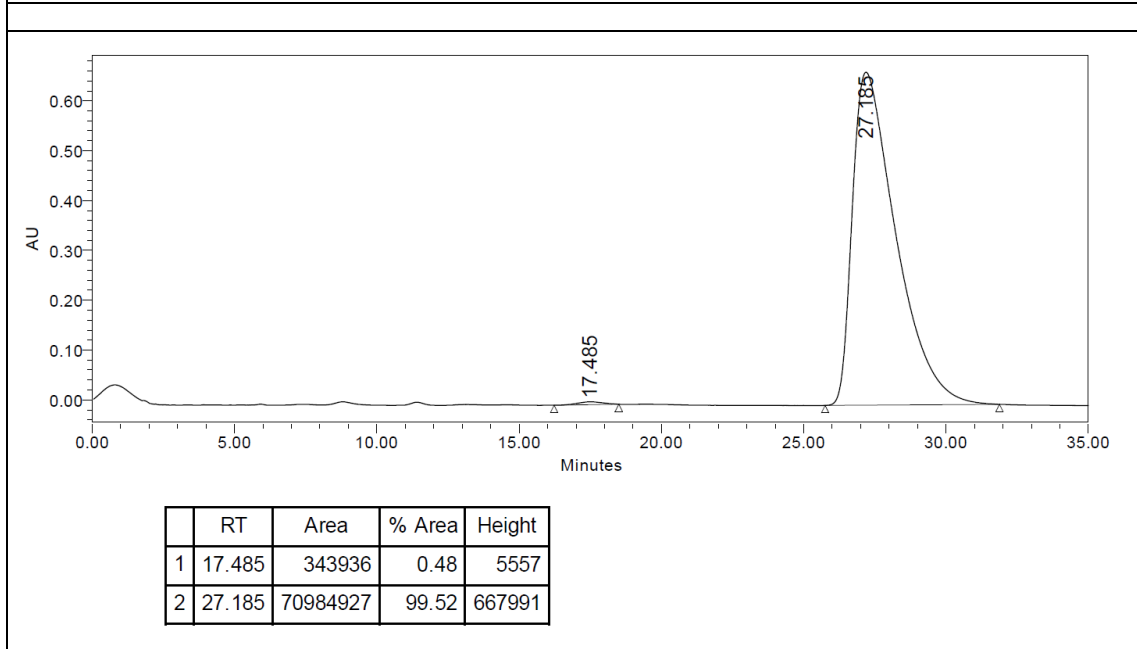



# SUPPLEMENTRAY INFORMATION

## Supplementary Fig. 126 HPLC analysis of *cis*-3ha

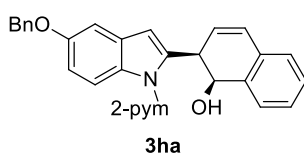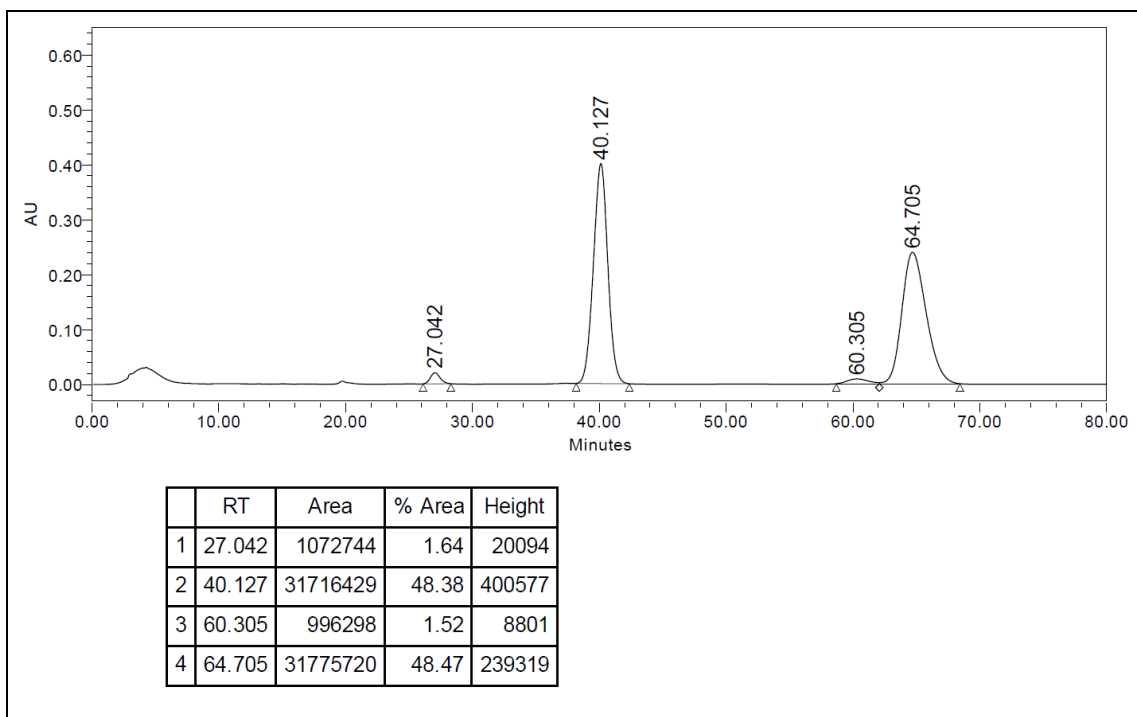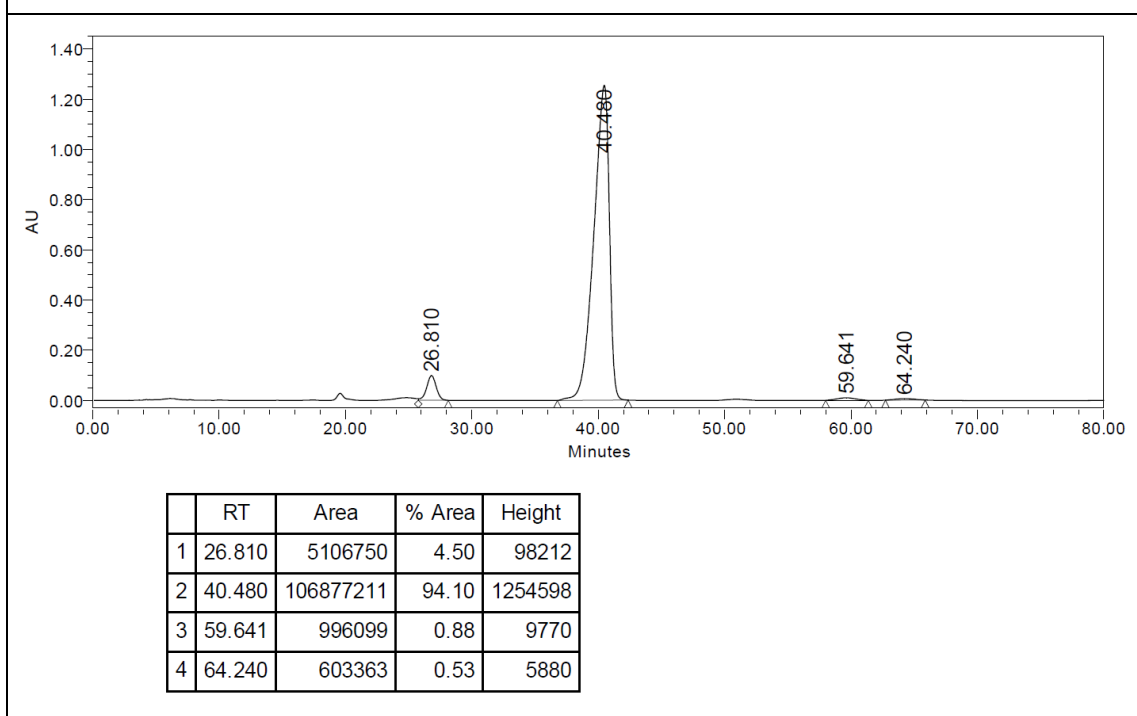

# SUPPLEMENTRAY INFORMATION

**Supplementary Fig. 127** HPLC analysis of *cis*-**3ia**

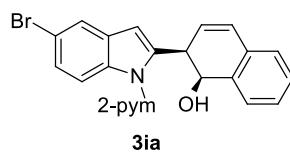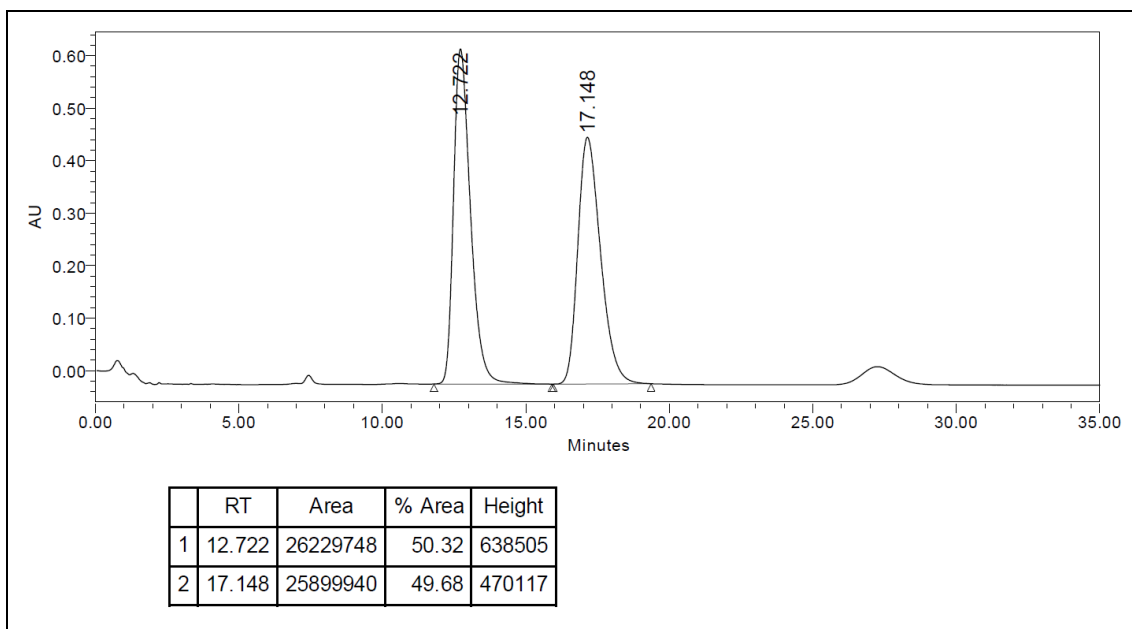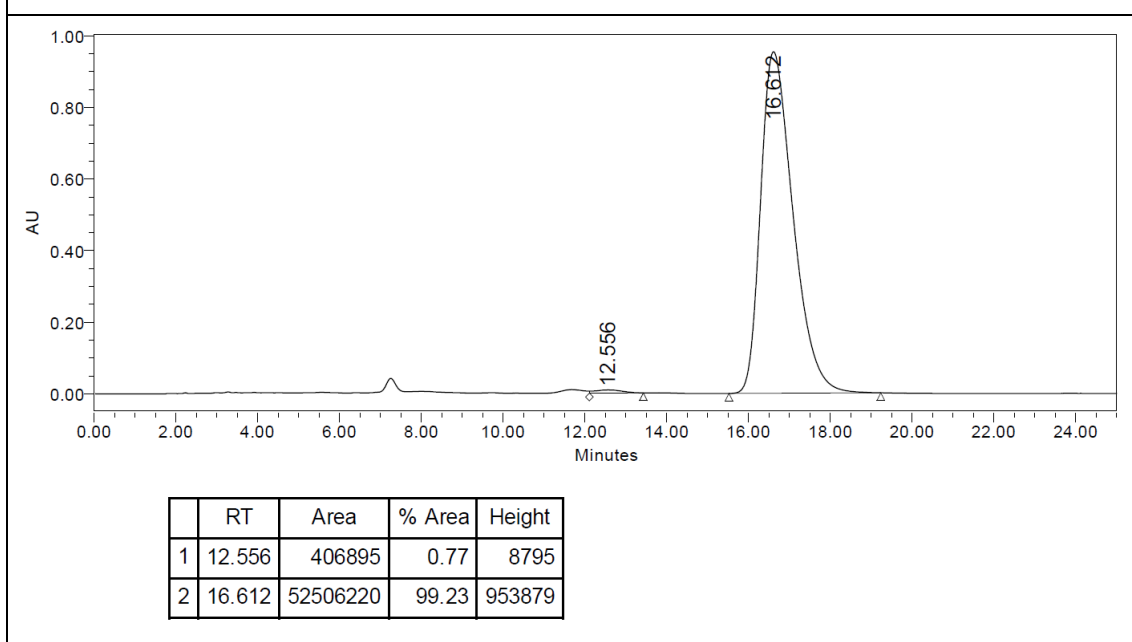

# SUPPLEMENTRAY INFORMATION

**Supplementary Fig. 128** HPLC analysis of *cis*-**3ja**

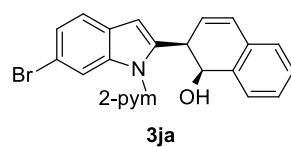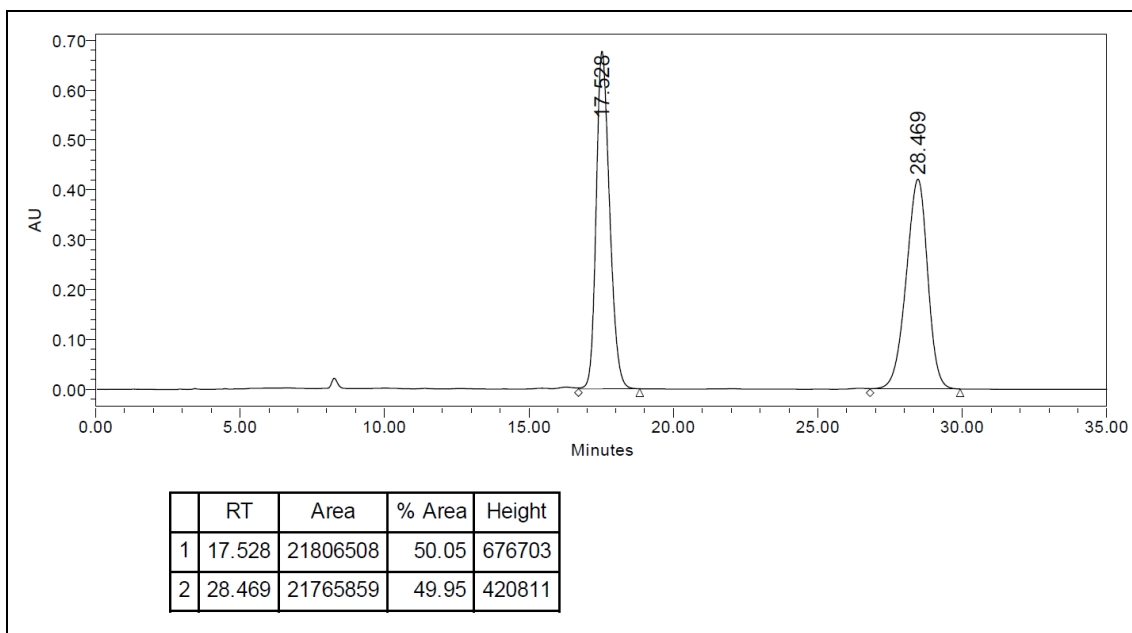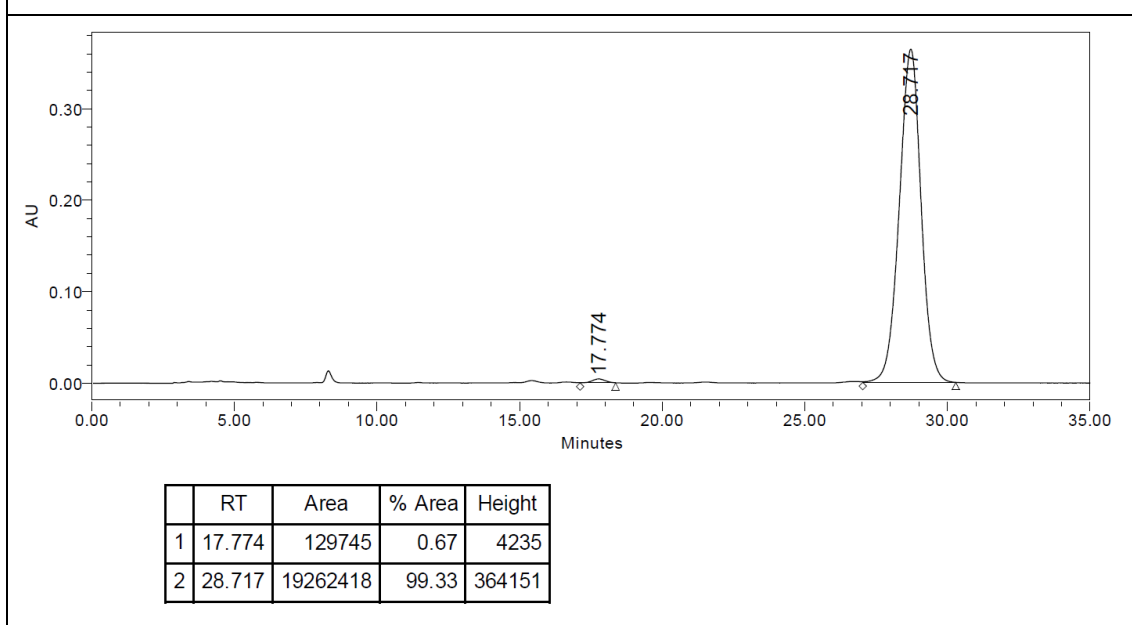

# SUPPLEMENTRAY INFORMATION

**Supplementary Fig. 129** HPLC analysis of *cis*-**3ka**

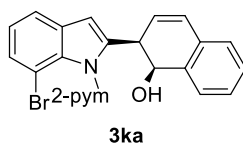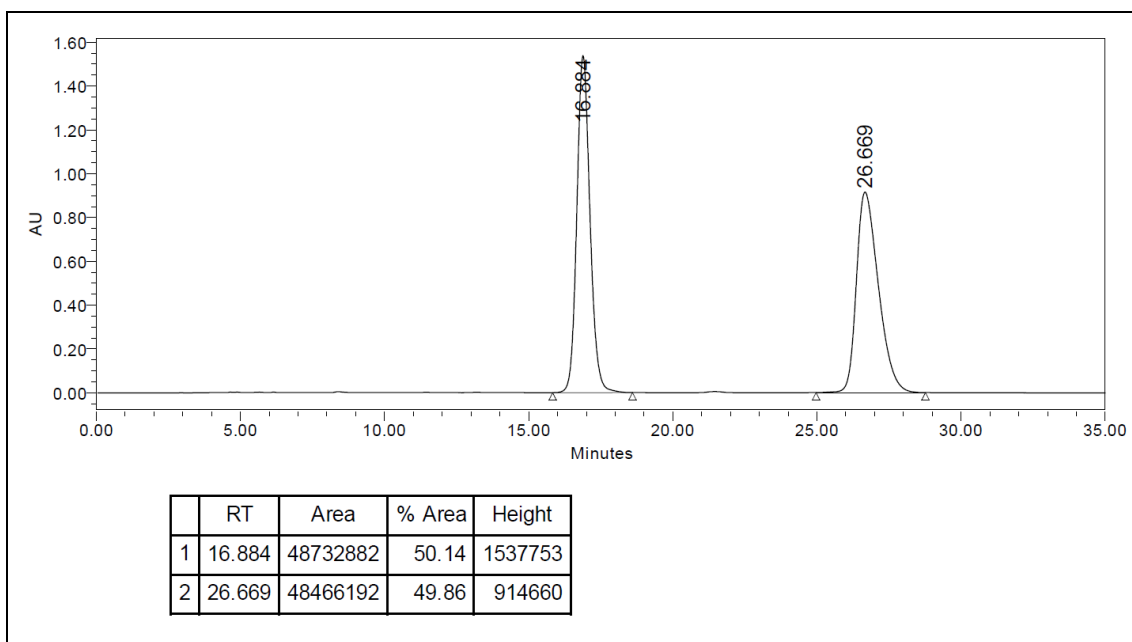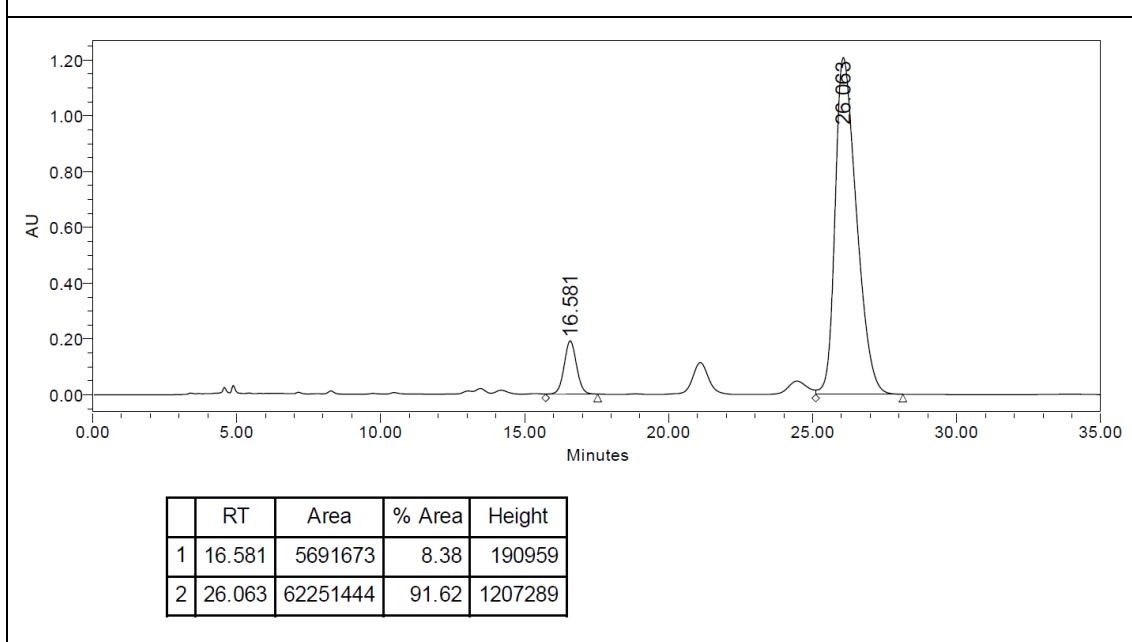

# SUPPLEMENTRAY INFORMATION

## Supplementary Fig. 130 HPLC analysis of *cis*-3la

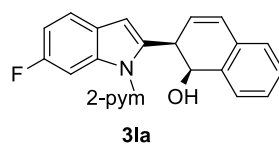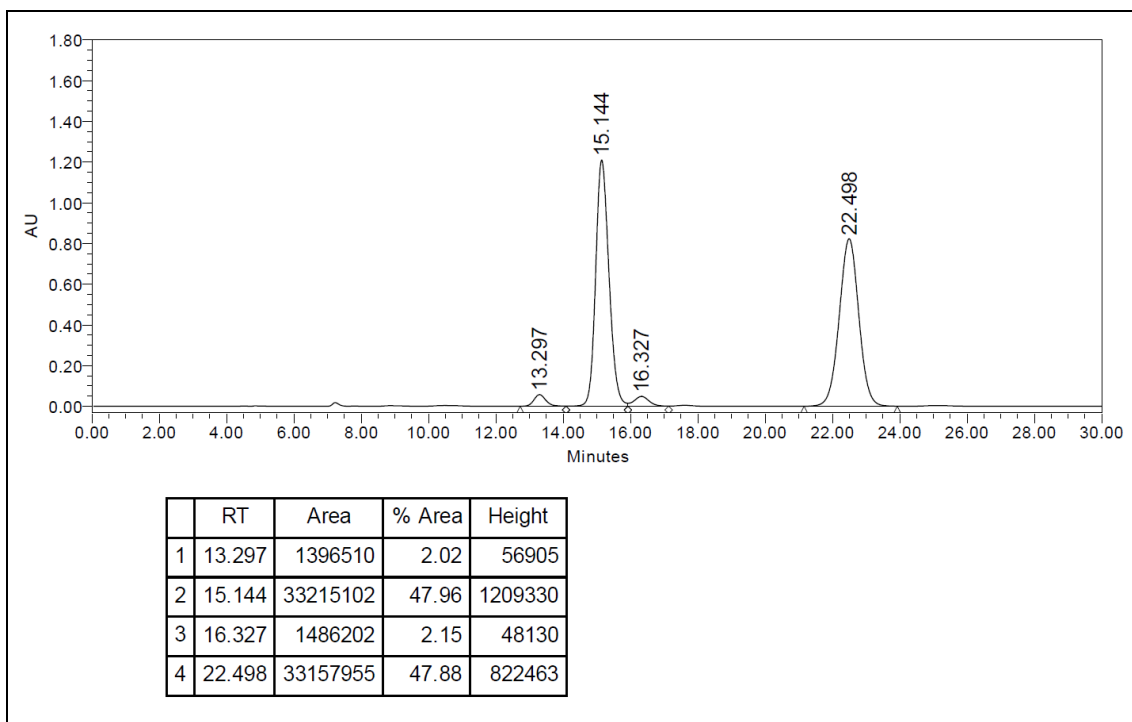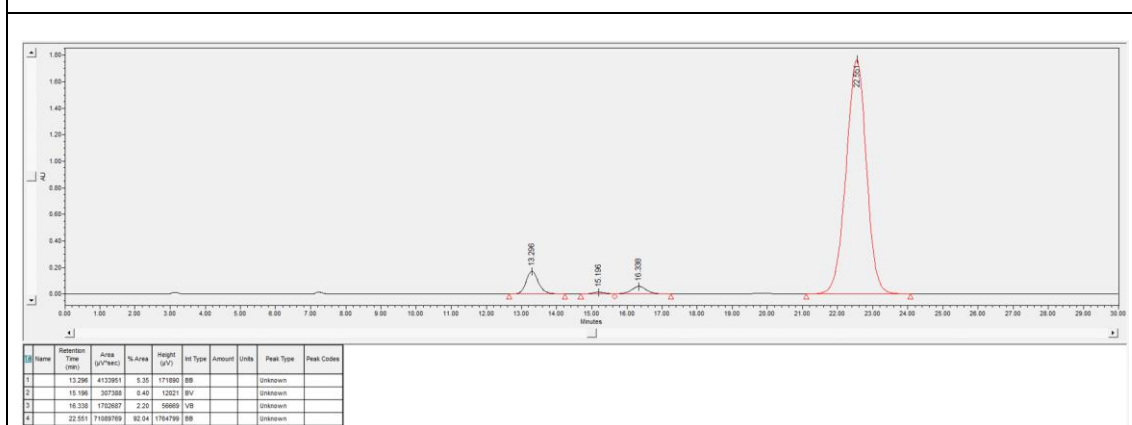

# SUPPLEMENTRAY INFORMATION

**Supplementary Fig. 131** HPLC analysis of *cis*-**3ma**

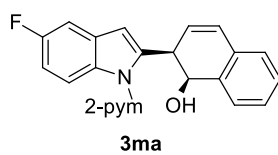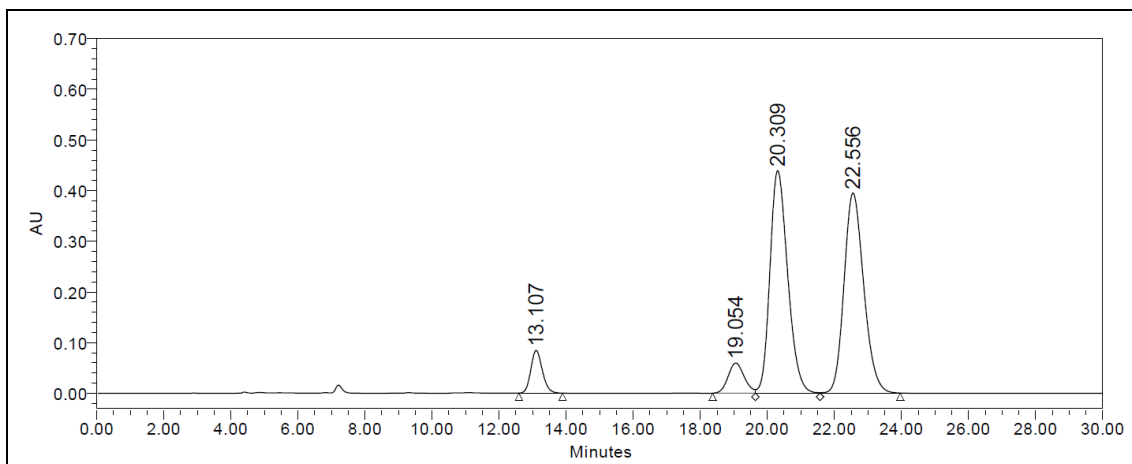

|   | RT     | Area     | % Area | Height |
|---|--------|----------|--------|--------|
| 1 | 13.107 | 2006280  | 5.53   | 84223  |
| 2 | 19.054 | 1979883  | 5.46   | 59395  |
| 3 | 20.309 | 16166905 | 44.55  | 439131 |
| 4 | 22.556 | 16138573 | 44.47  | 394803 |

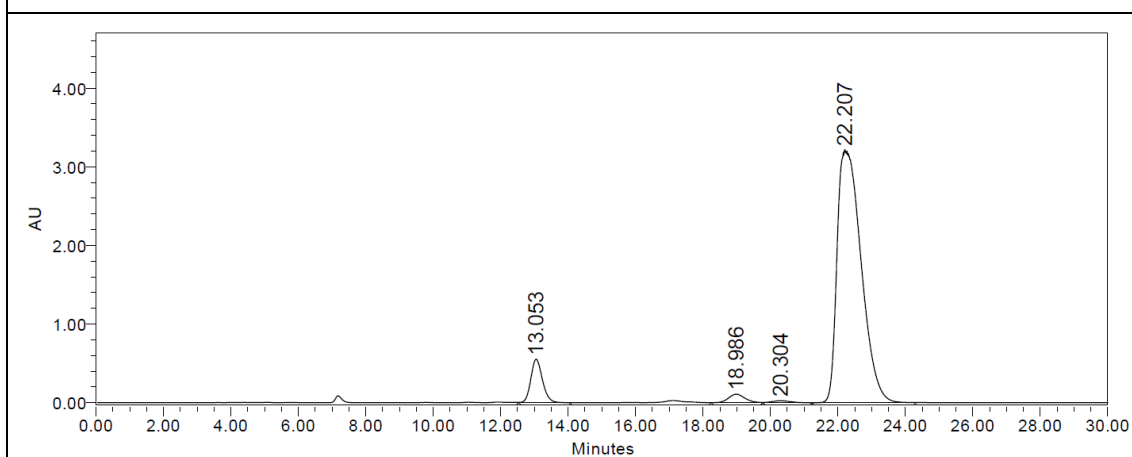

|   | RT     | Area      | % Area | Height  |
|---|--------|-----------|--------|---------|
| 1 | 13.053 | 13172155  | 7.46   | 551671  |
| 2 | 18.986 | 3613771   | 2.05   | 107161  |
| 3 | 20.304 | 880486    | 0.50   | 24423   |
| 4 | 22.207 | 158800725 | 89.99  | 3213856 |

# SUPPLEMENTRAY INFORMATION

## Supplementary Fig. 132 HPLC analysis of *cis*-3na

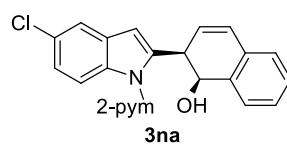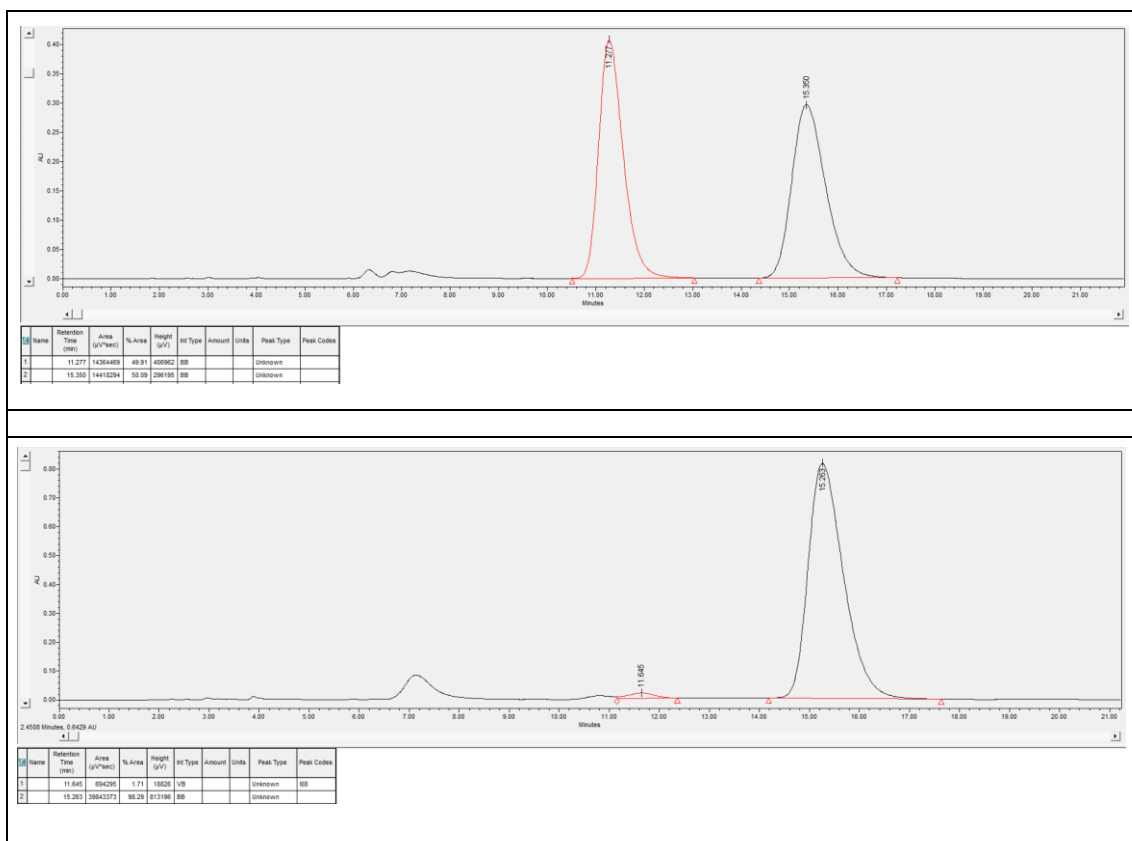

# SUPPLEMENTRAY INFORMATION

## Supplementary Fig. 133 HPLC analysis of *cis*-3oa

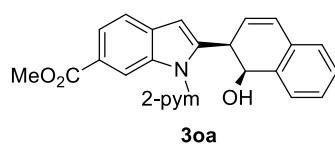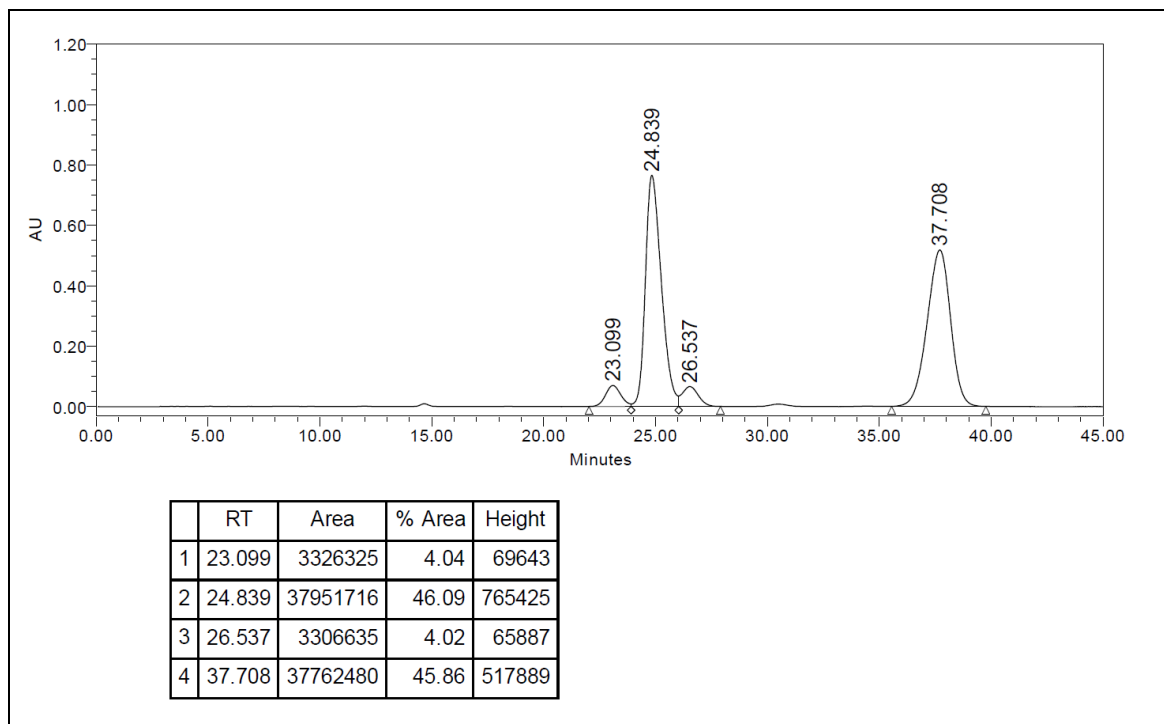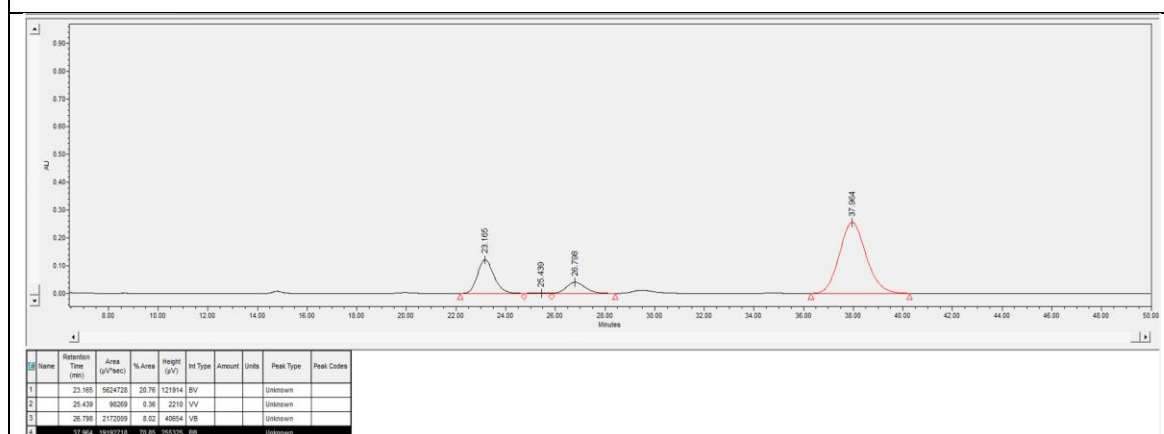



# SUPPLEMENTRAY INFORMATION

## Supplementary Fig. 134 HPLC analysis of *cis*-3pa

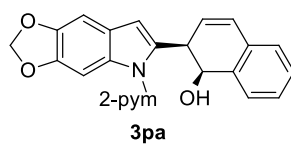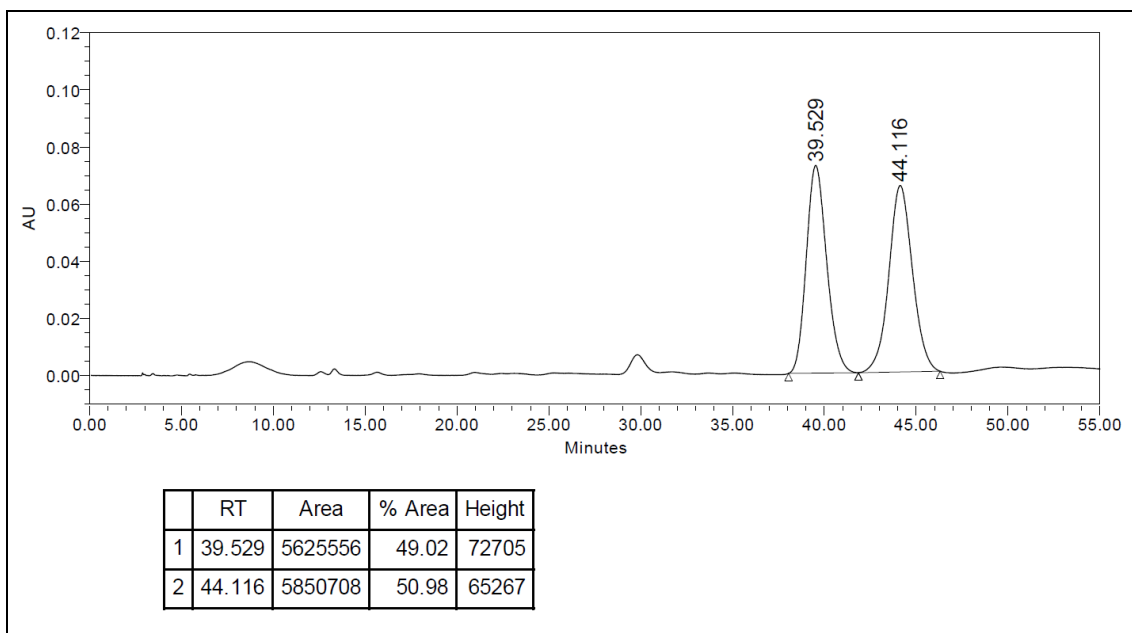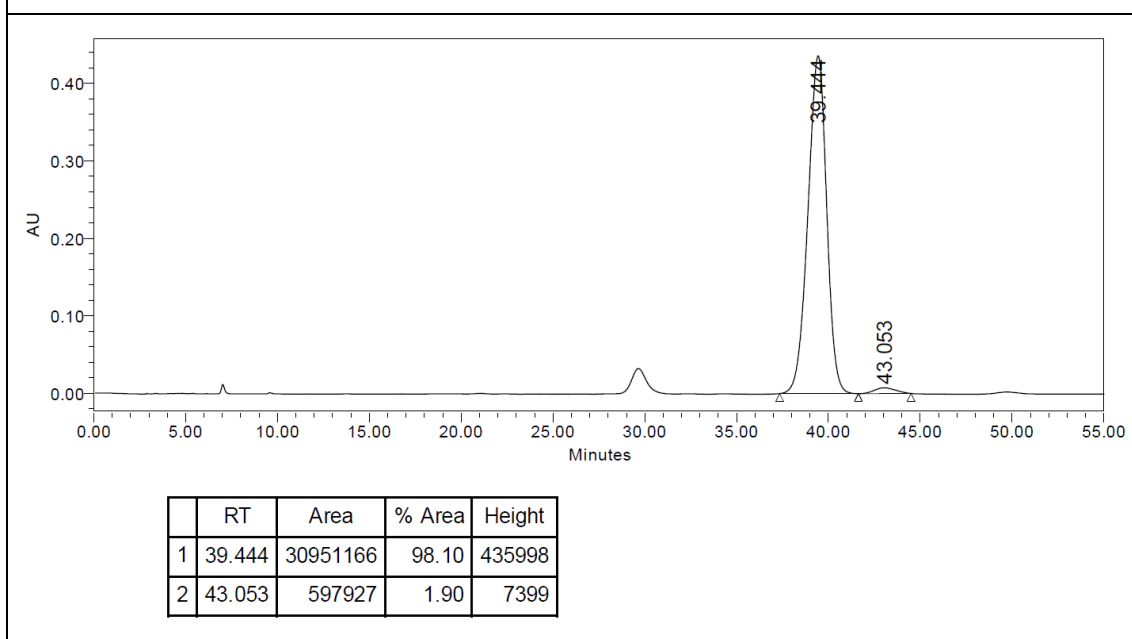

# SUPPLEMENTRAY INFORMATION

## Supplementary Fig. 135 HPLC analysis of *cis*-3qa

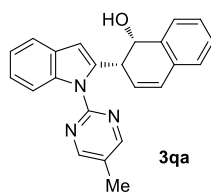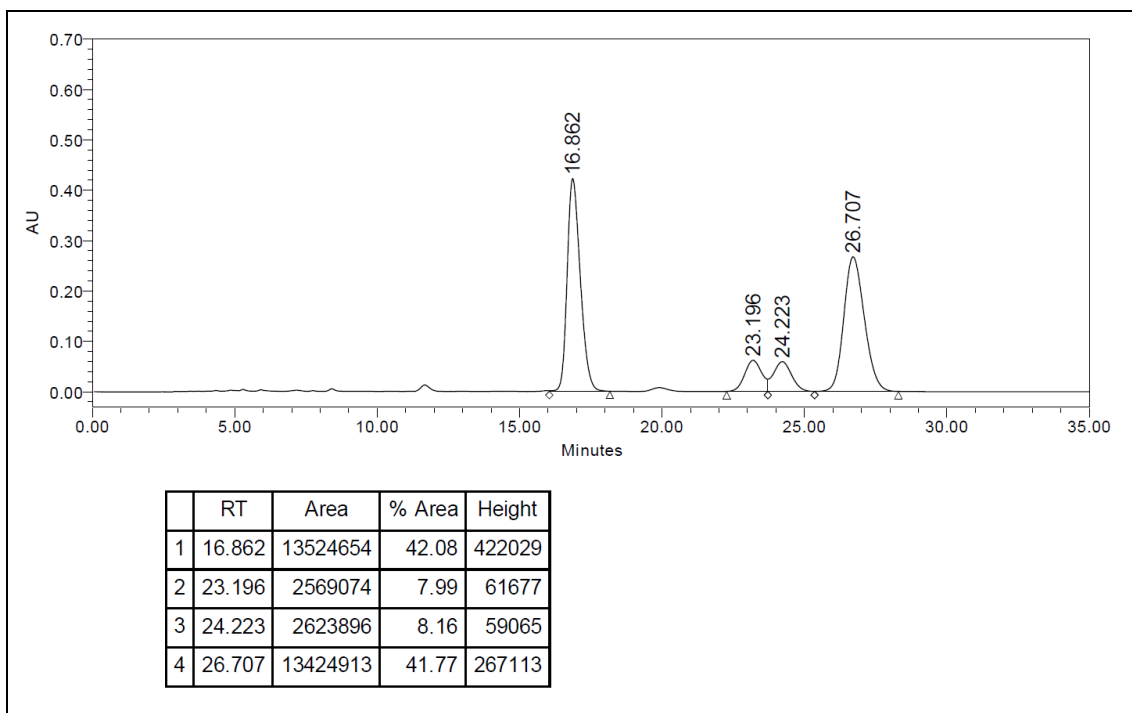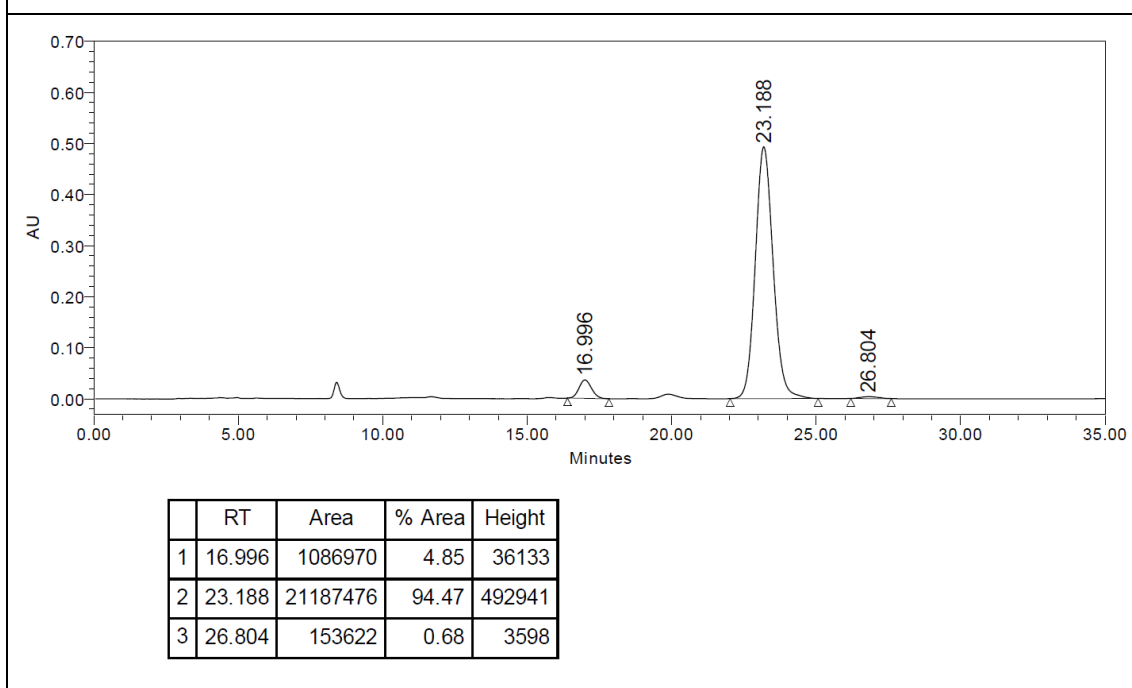

# SUPPLEMENTRAY INFORMATION

**Supplementary Fig. 136** HPLC analysis of *cis*-3ra

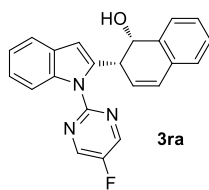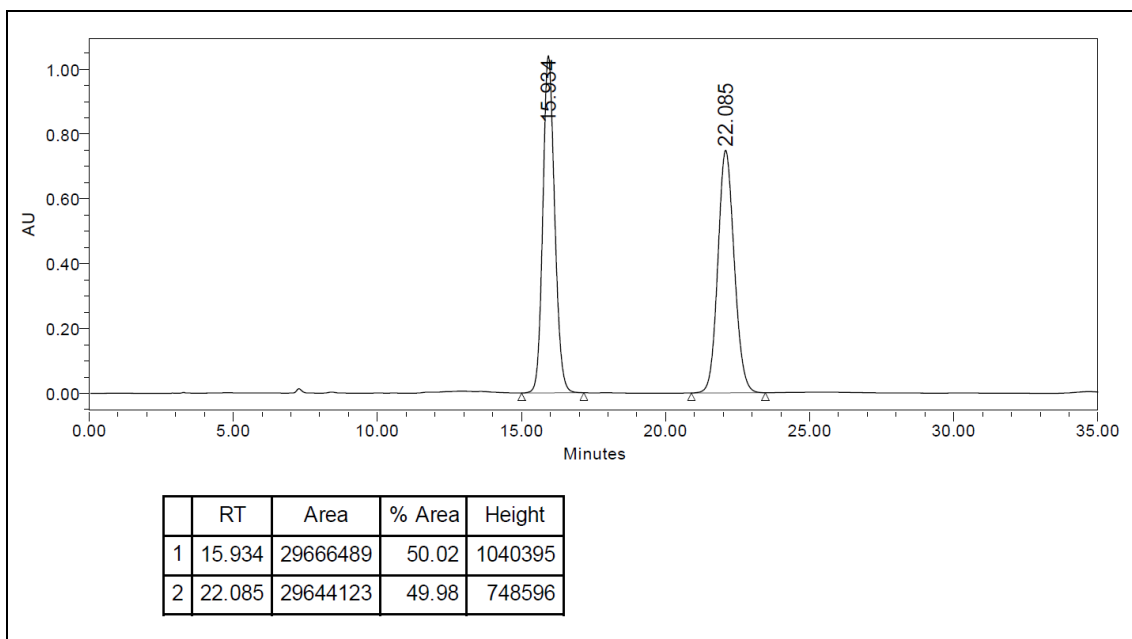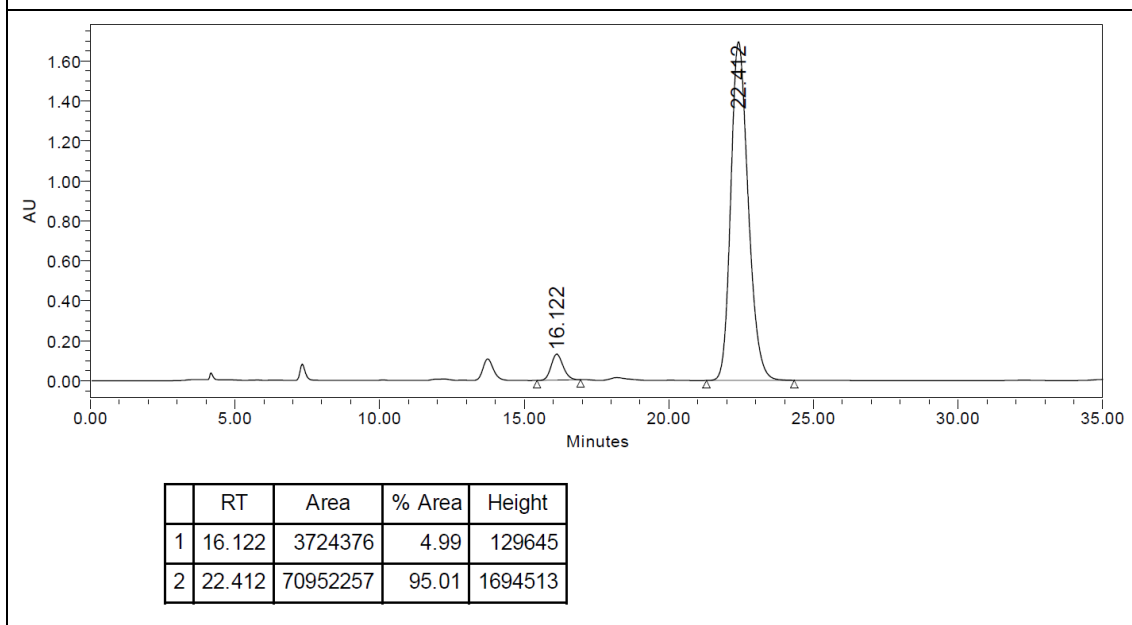

# SUPPLEMENTRAY INFORMATION

## Supplementary Fig. 137 HPLC analysis of *cis*-3sa

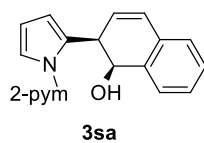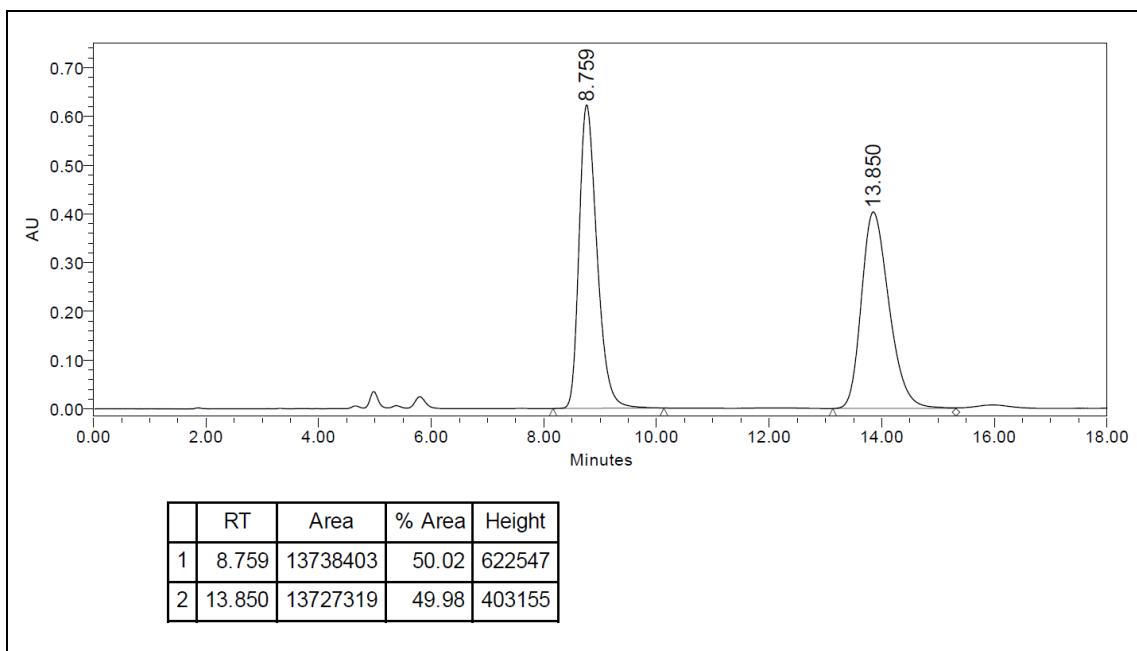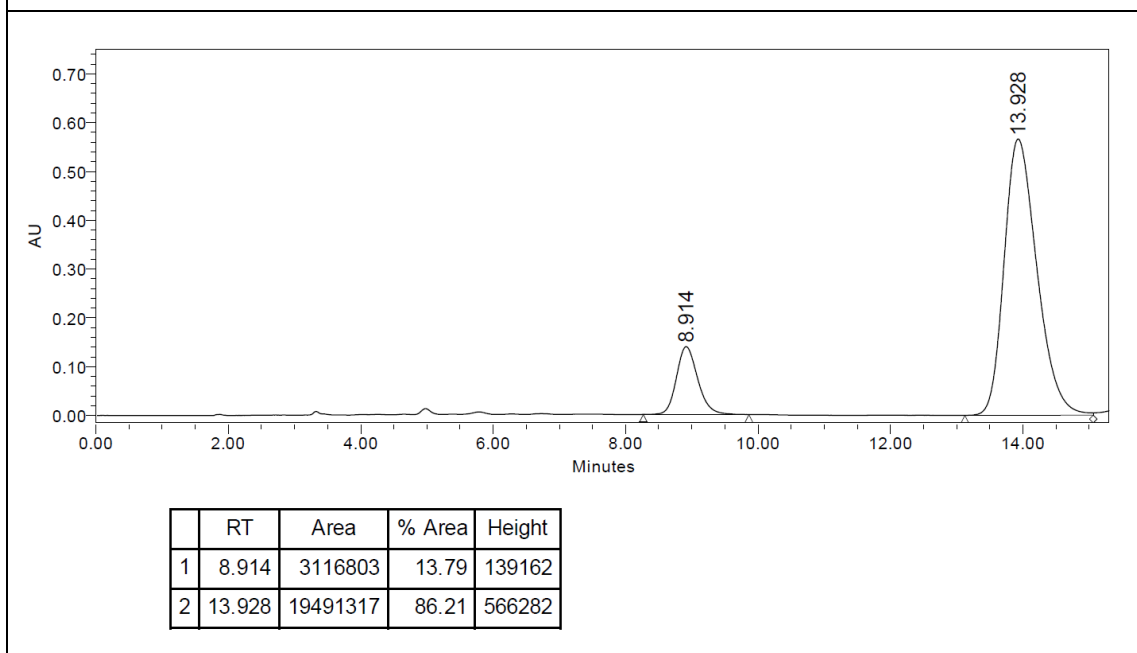

# SUPPLEMENTRAY INFORMATION

**Supplementary Fig. 138** HPLC analysis of *cis*-**3ta**

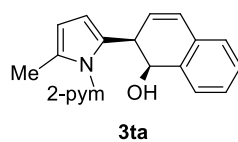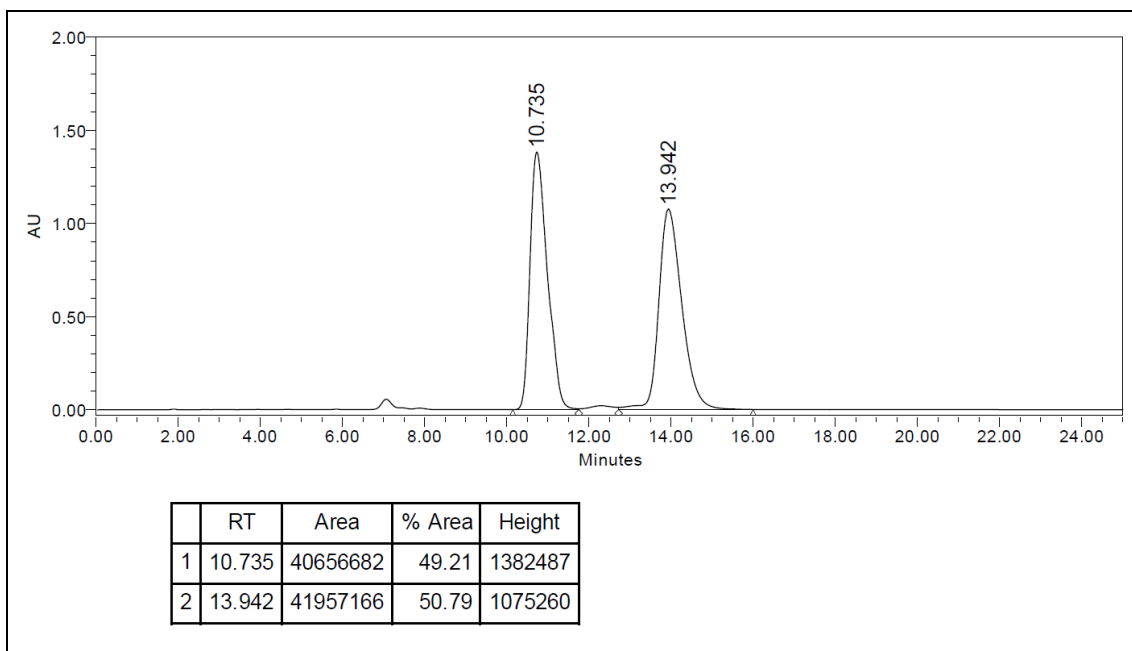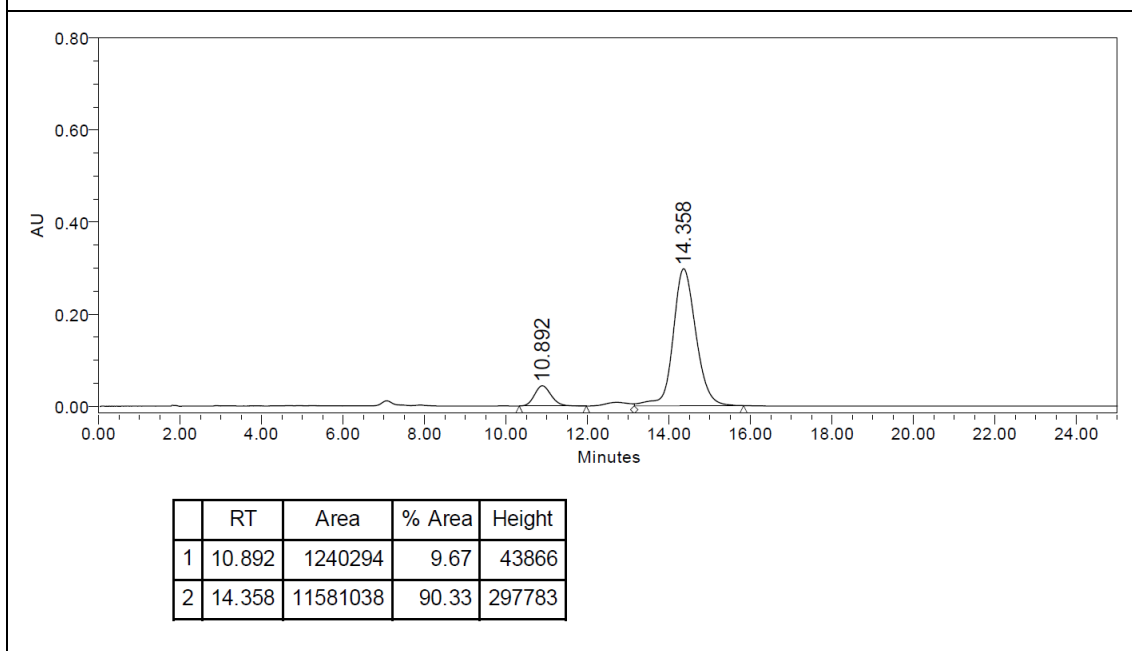

# SUPPLEMENTRAY INFORMATION

## Supplementary Fig. 139 HPLC analysis of *cis*-3ua

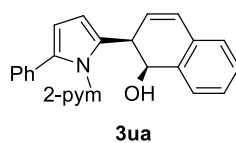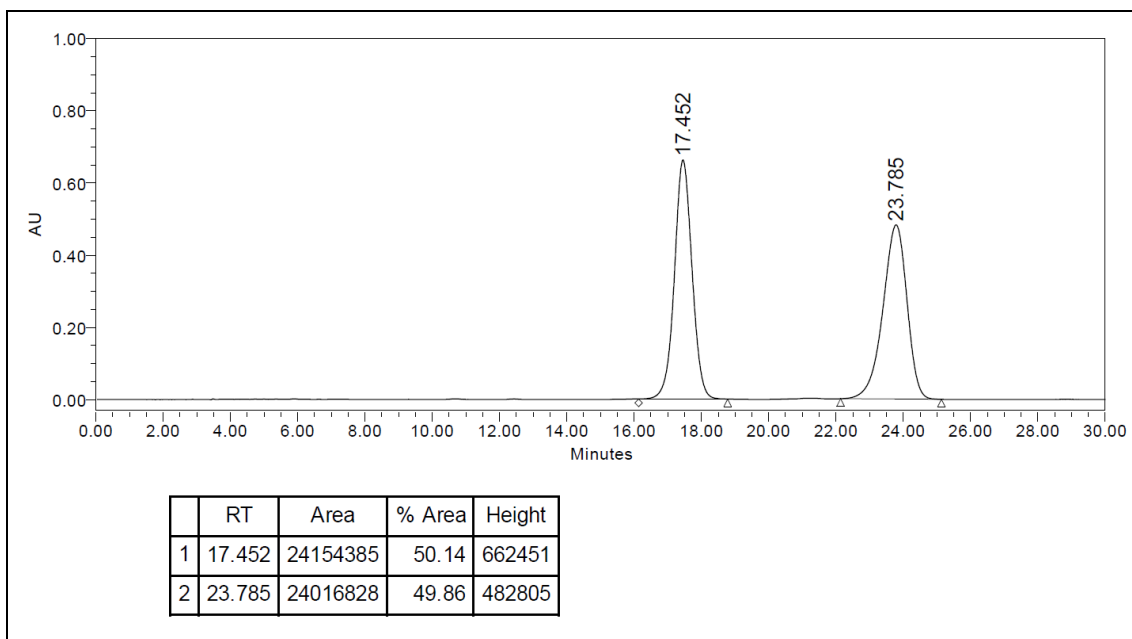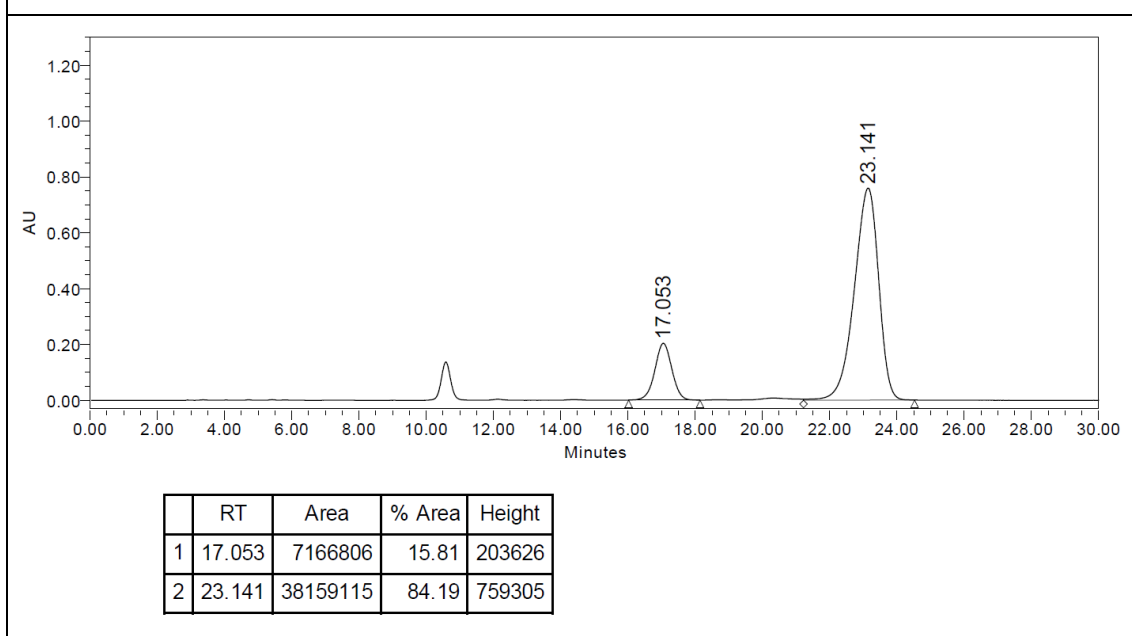

# SUPPLEMENTRAY INFORMATION

**Supplementary Fig. 140** HPLC analysis of *cis*-**3va**

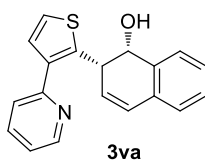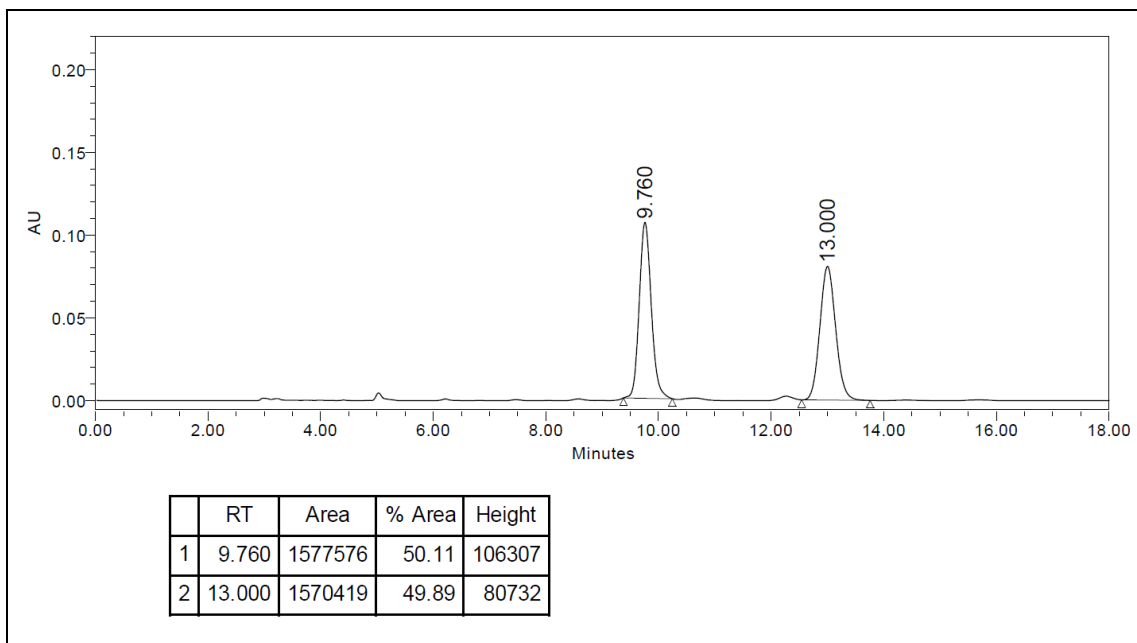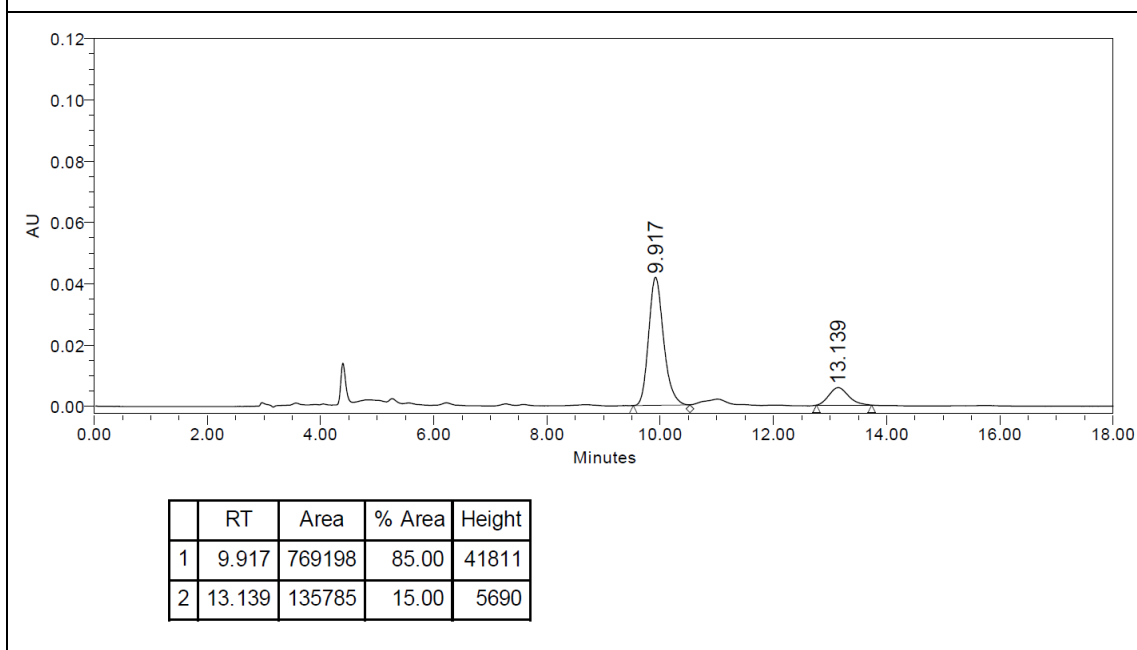

# SUPPLEMENTRAY INFORMATION

**Supplementary Fig. 141** HPLC analysis of *cis*-**3wa**

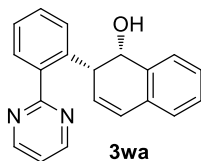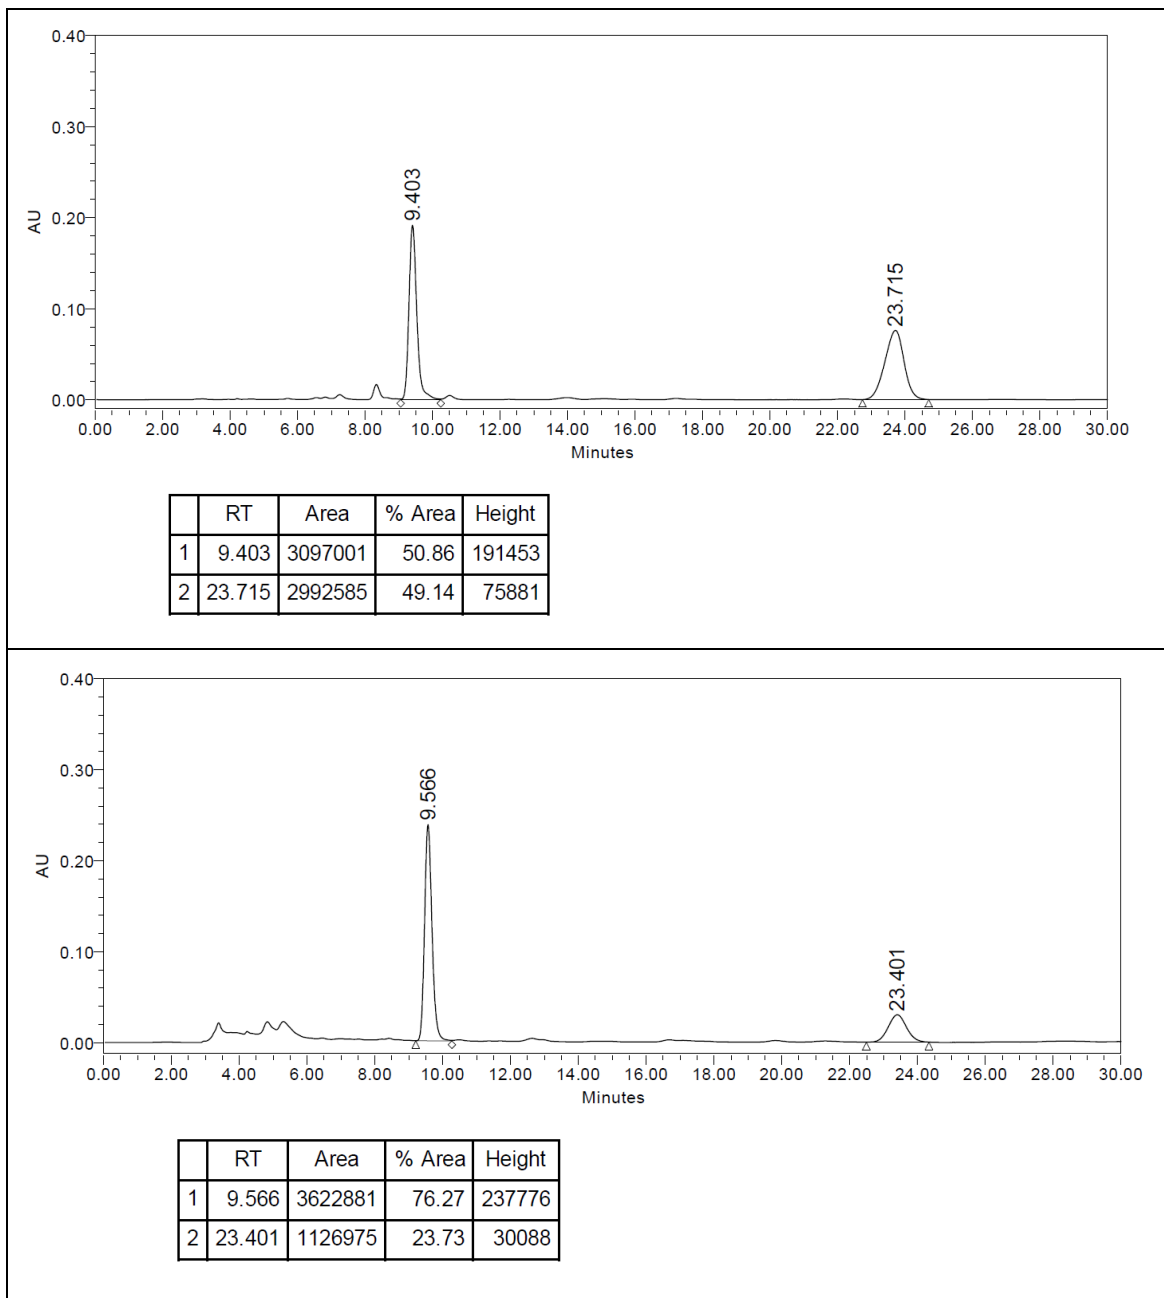



# SUPPLEMENTRAY INFORMATION

## Supplementary Fig. 142 HPLC analysis of *cis*-3ab

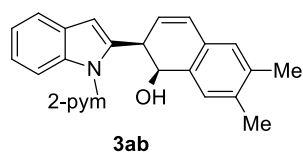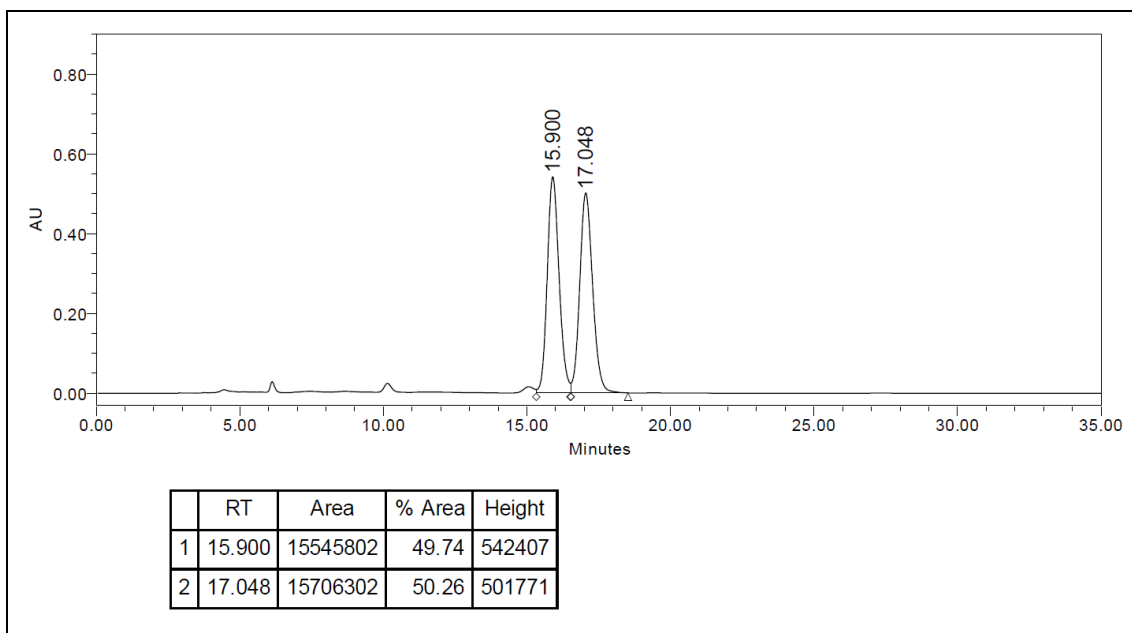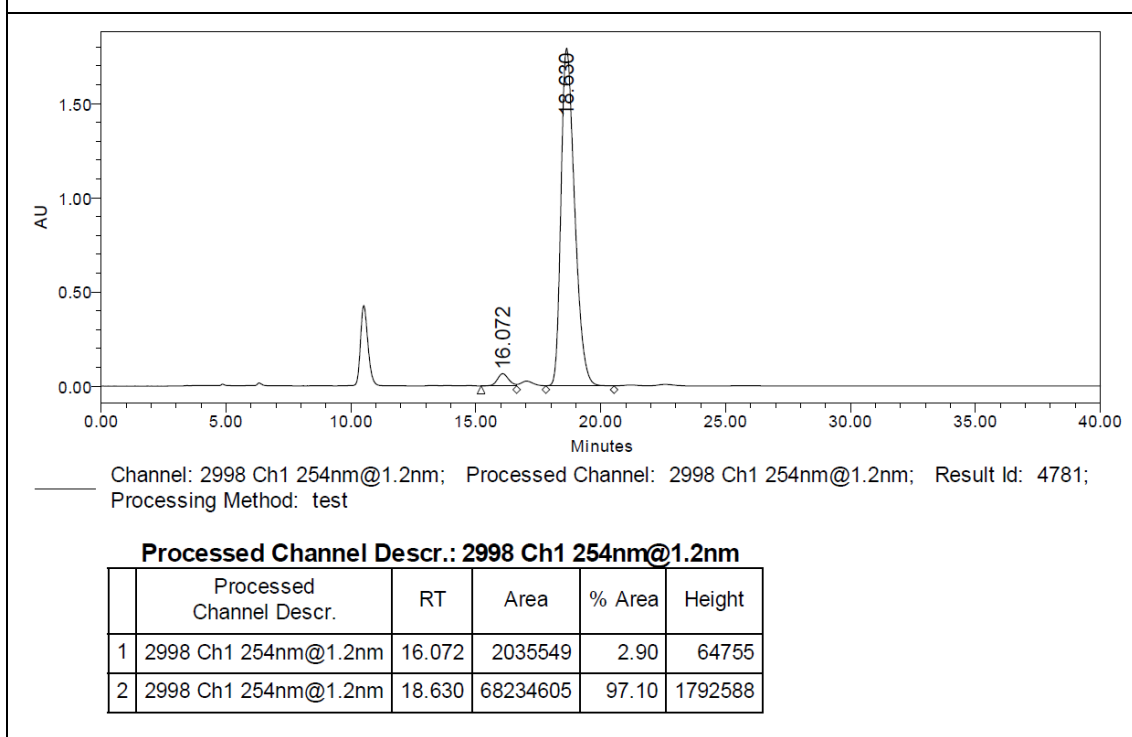

# SUPPLEMENTRAY INFORMATION

## Supplementary Fig. 143 HPLC analysis of *cis*-3ac

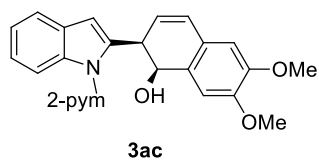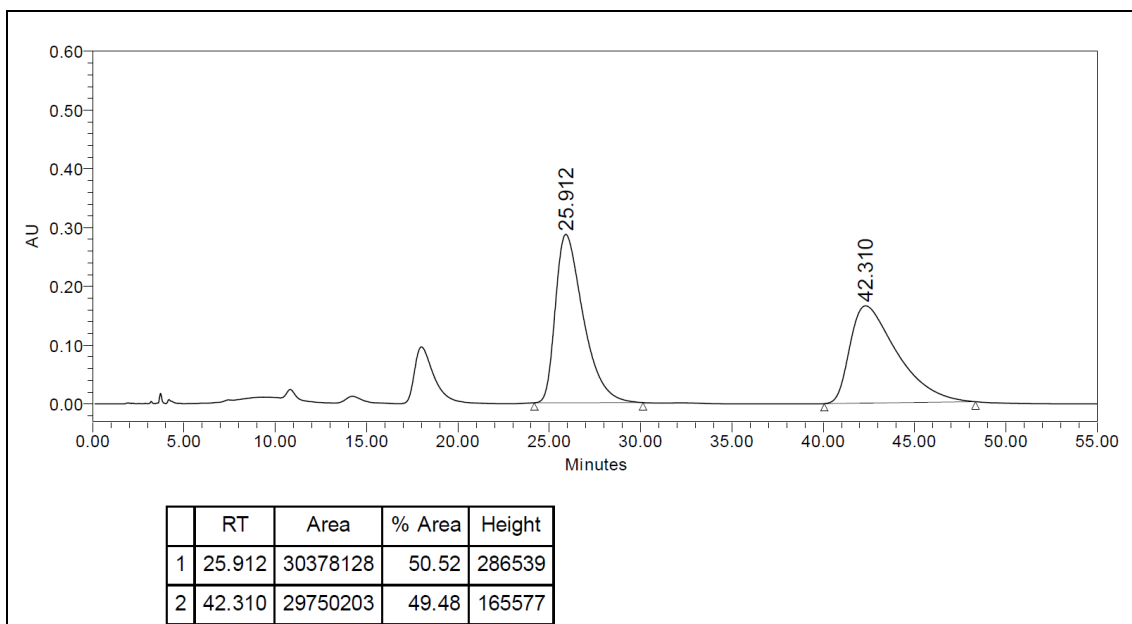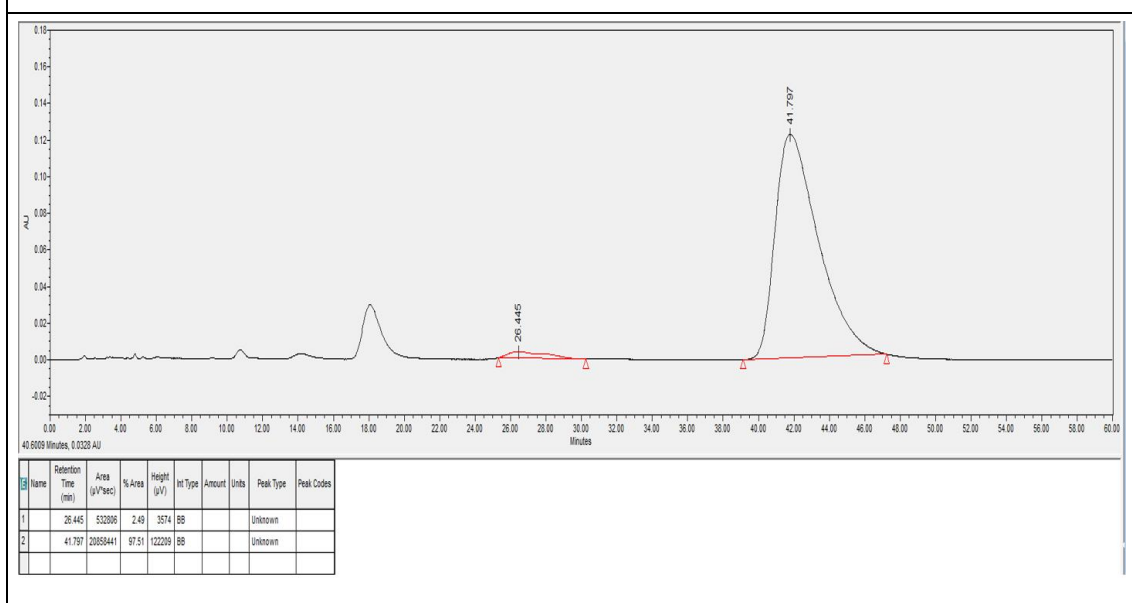

# SUPPLEMENTRAY INFORMATION

**Supplementary Fig. 144** HPLC analysis of *cis*-**3ad**

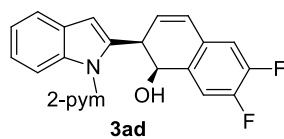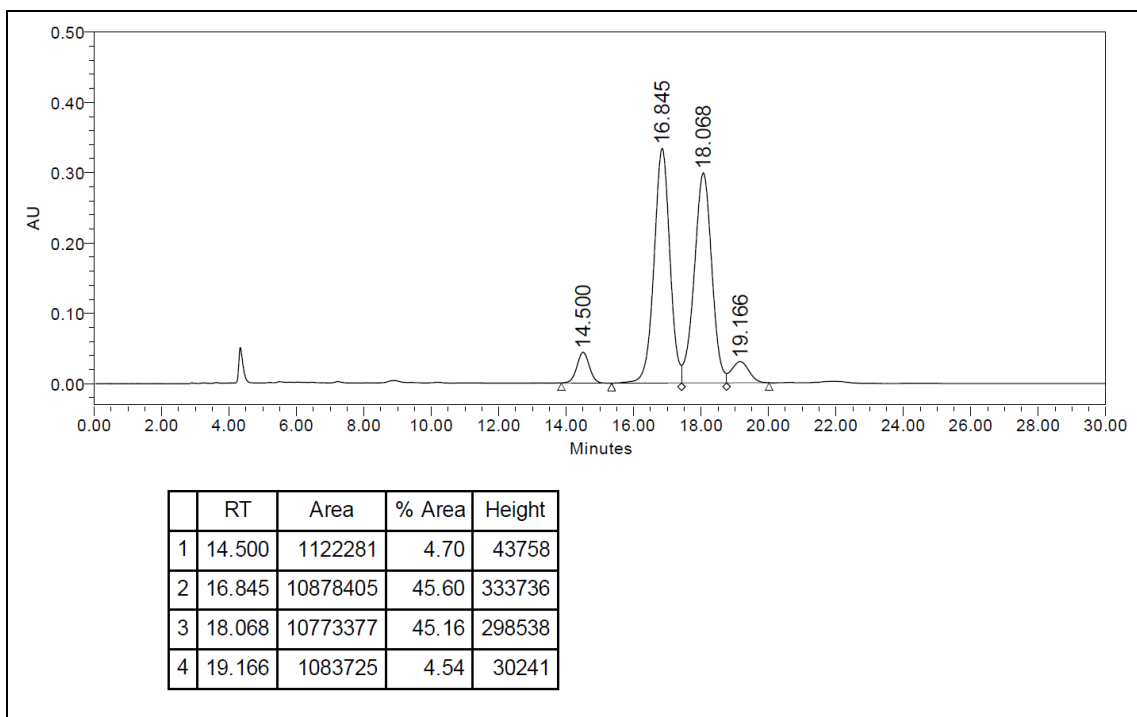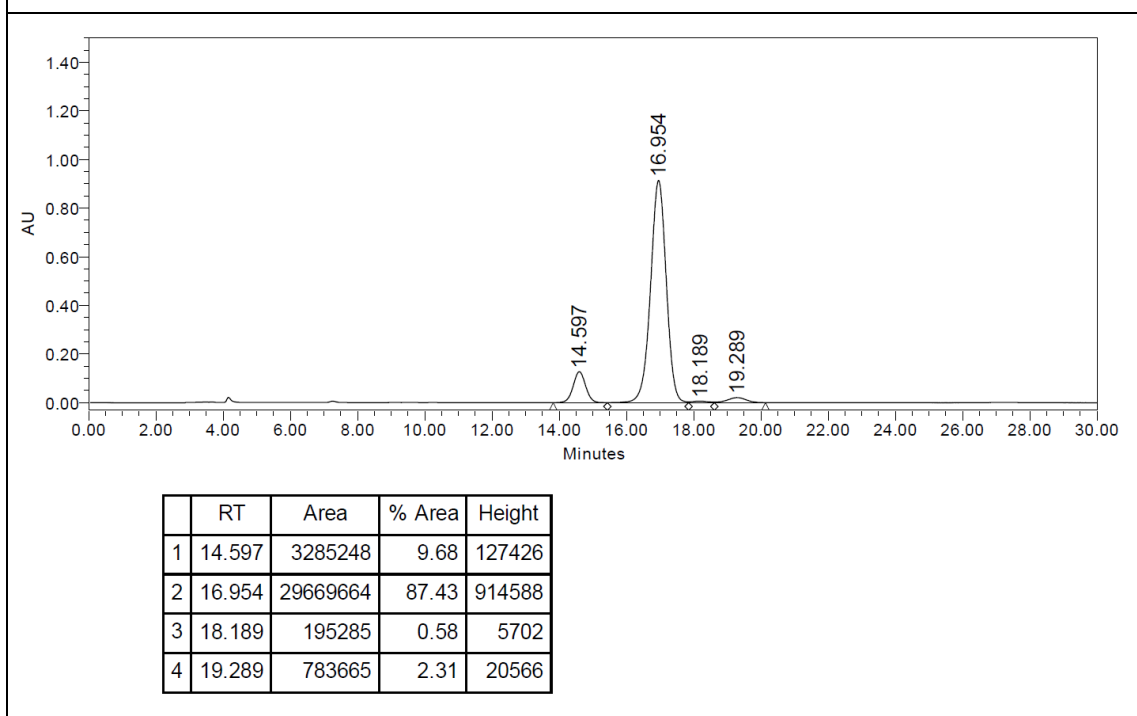

# SUPPLEMENTRAY INFORMATION

## Supplementary Fig. 145 HPLC analysis of *cis*-3ae

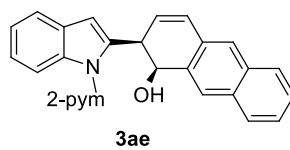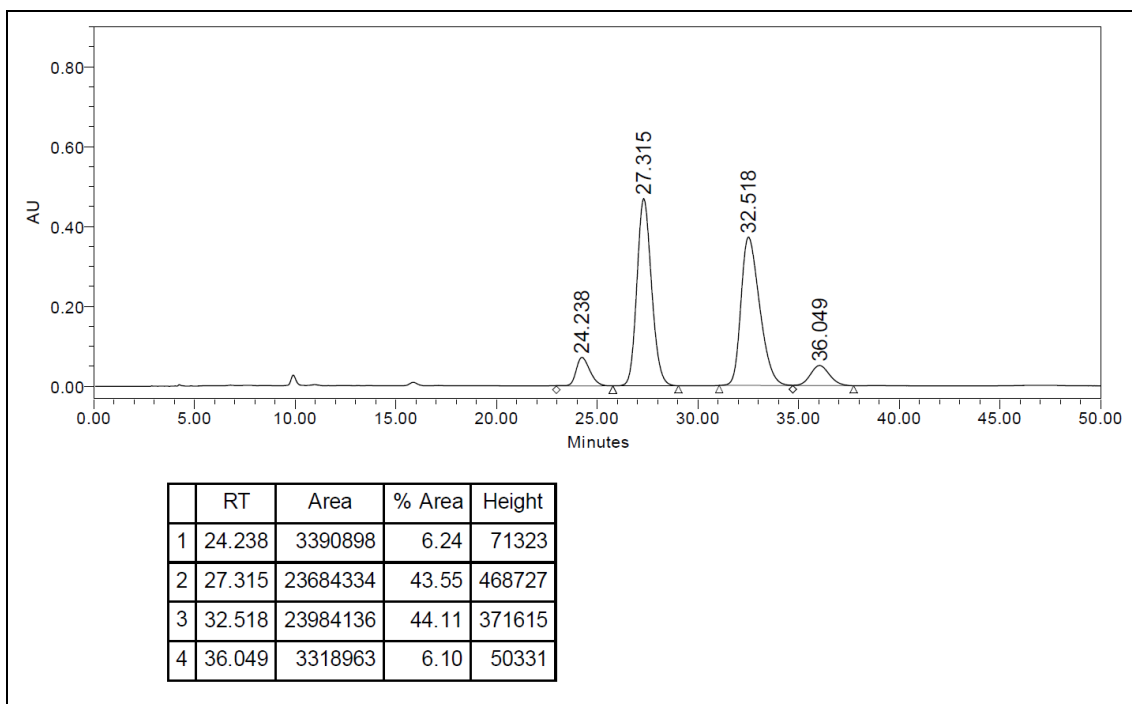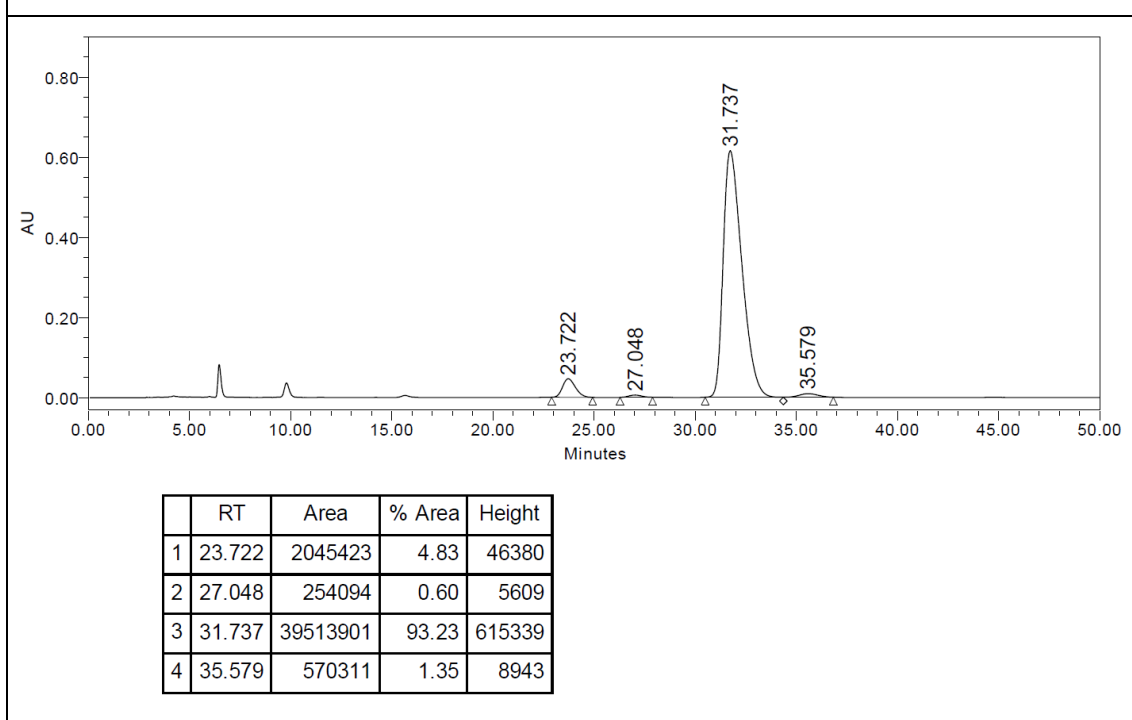

# SUPPLEMENTRAY INFORMATION

## Supplementary Fig. 146 HPLC analysis of *cis*-3af

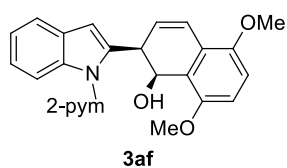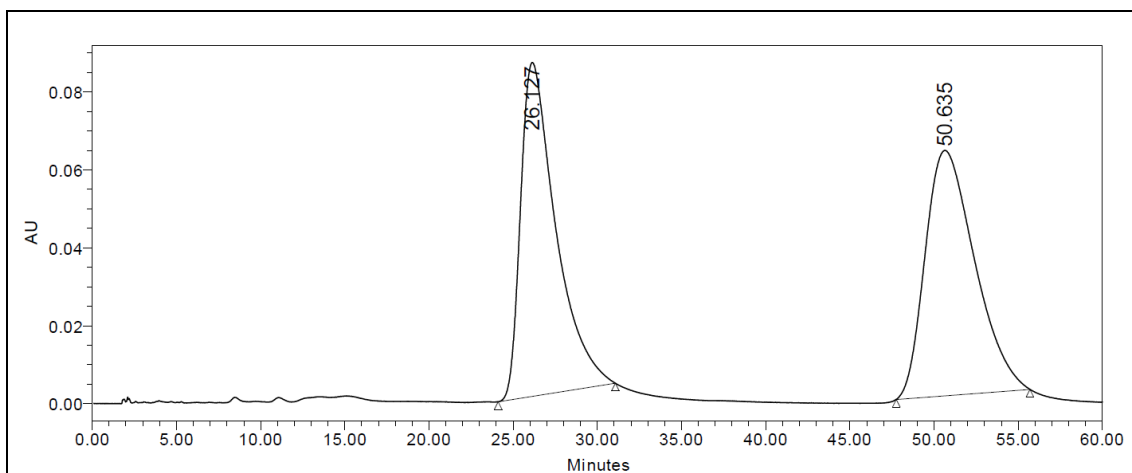

Channel: 2998 Ch1 254nm@1.2nm; Processed Channel: 2998 Ch1 254nm@1.2nm; Result Id: 4743; Processing Method: zds

### Processed Channel Descr.: 2998 Ch1 254nm@1.2nm

|   | Processed Channel Descr. | RT     | Area     | % Area | Height |
|---|--------------------------|--------|----------|--------|--------|
| 1 | 2998 Ch1 254nm@1.2nm     | 26.127 | 12470331 | 49.20  | 85708  |
| 2 | 2998 Ch1 254nm@1.2nm     | 50.635 | 12878125 | 50.80  | 63007  |

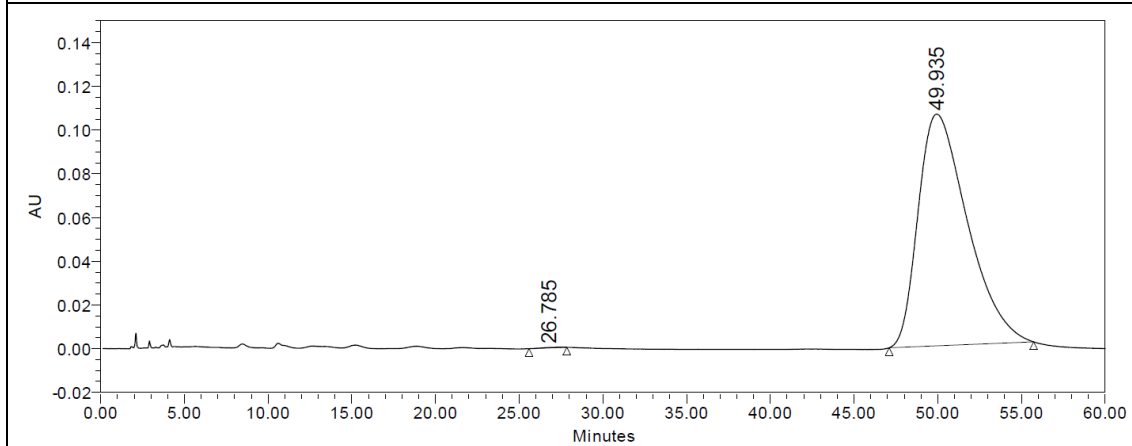

|   | RT     | Area     | % Area | Height |
|---|--------|----------|--------|--------|
| 1 | 26.785 | 17352    | 0.08   | 252    |
| 2 | 49.935 | 21703335 | 99.92  | 106010 |

# SUPPLEMENTRAY INFORMATION

**Supplementary Fig. 147** HPLC analysis of *cis*-**3ag**

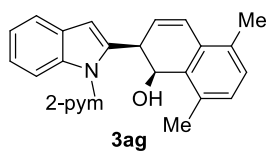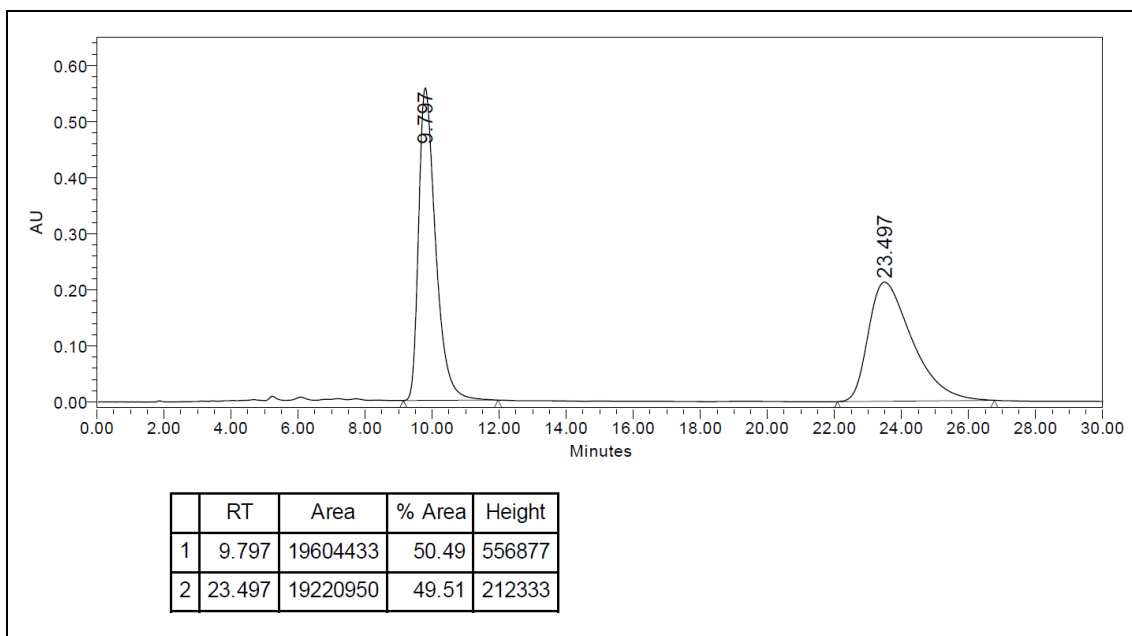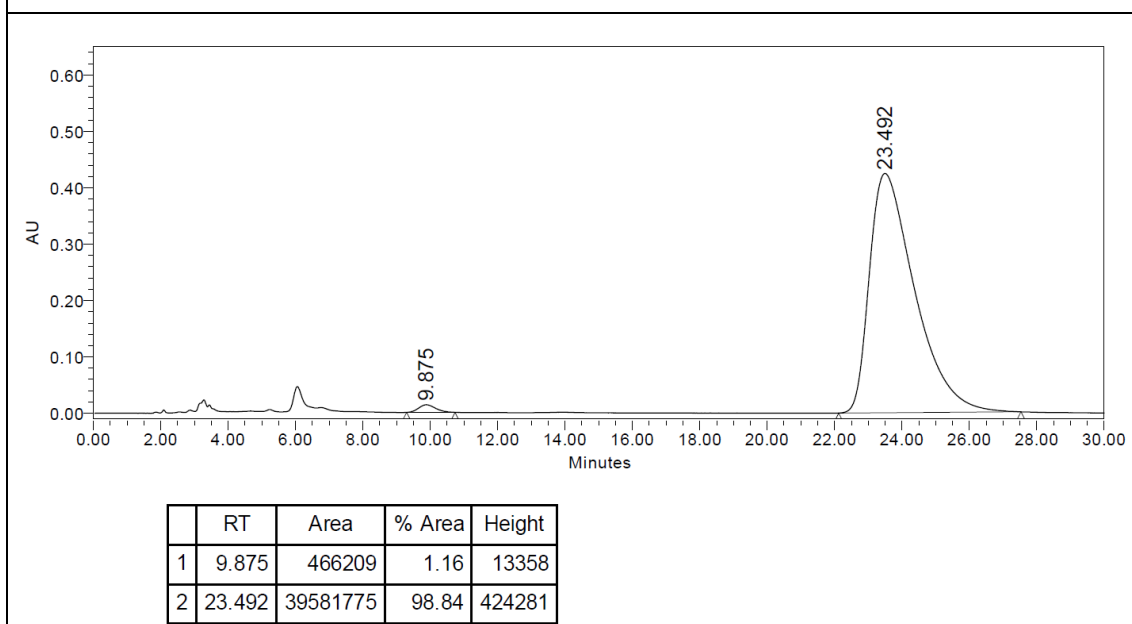

# SUPPLEMENTRAY INFORMATION

## Supplementary Fig. 148 HPLC analysis of *cis*-3ah

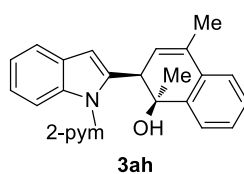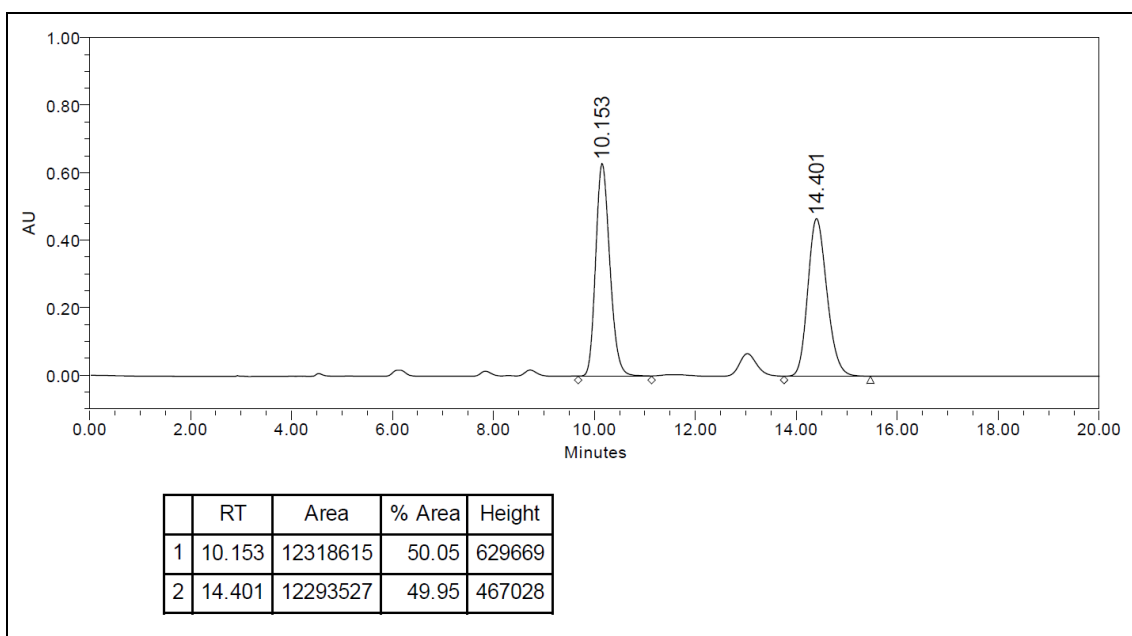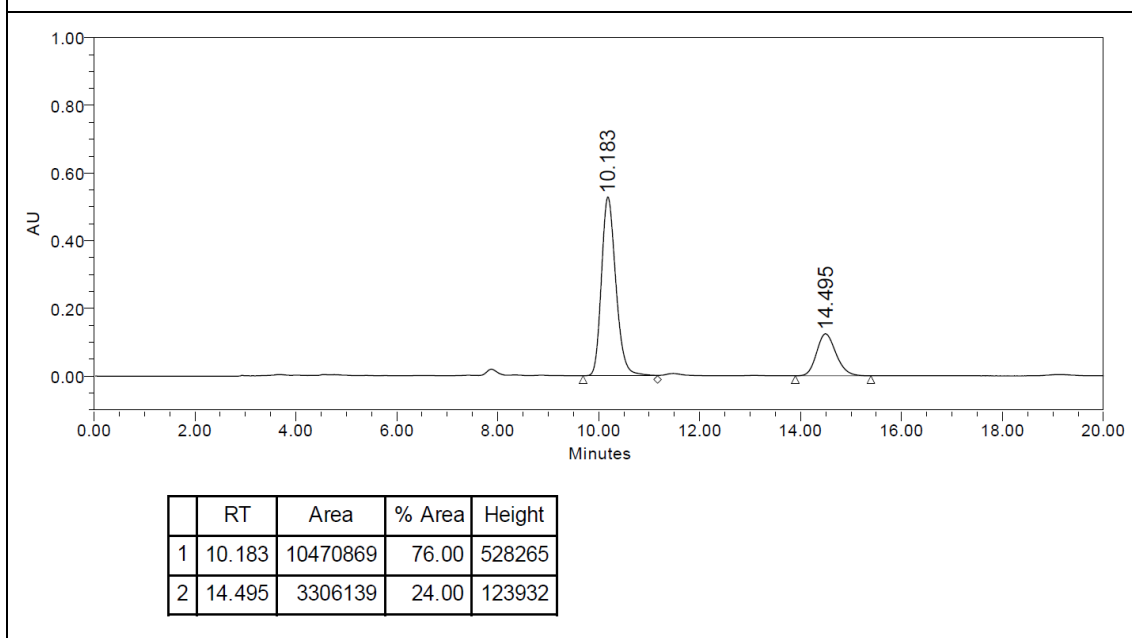

# SUPPLEMENTRAY INFORMATION

## Supplementary Fig. 149 HPLC analysis of *cis*-3ai

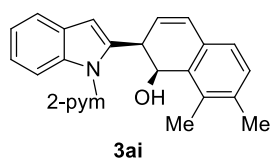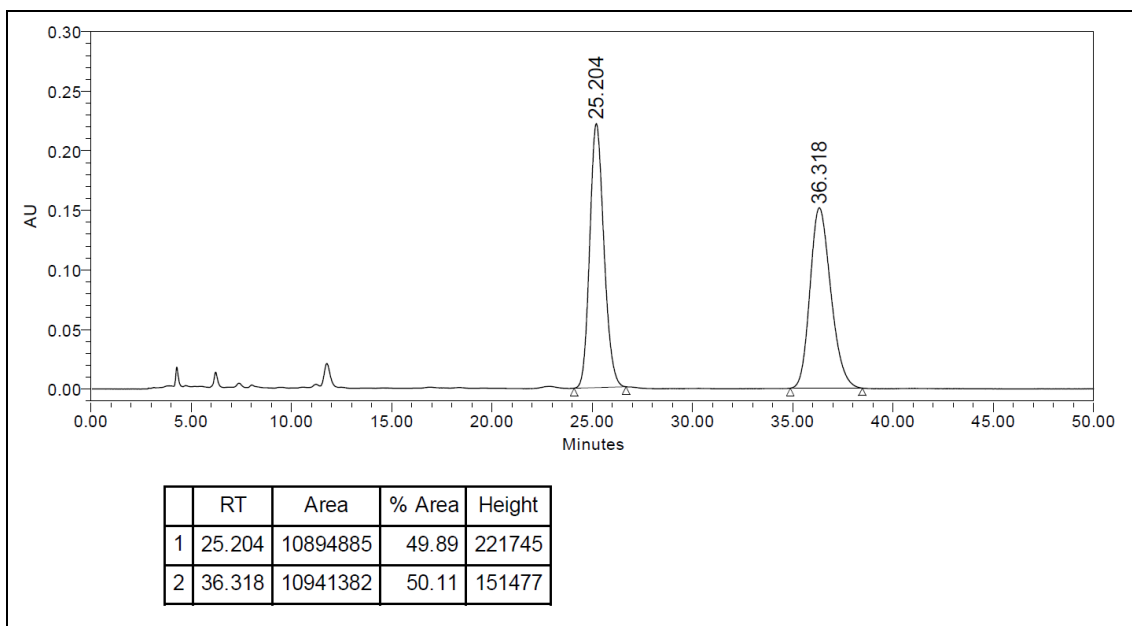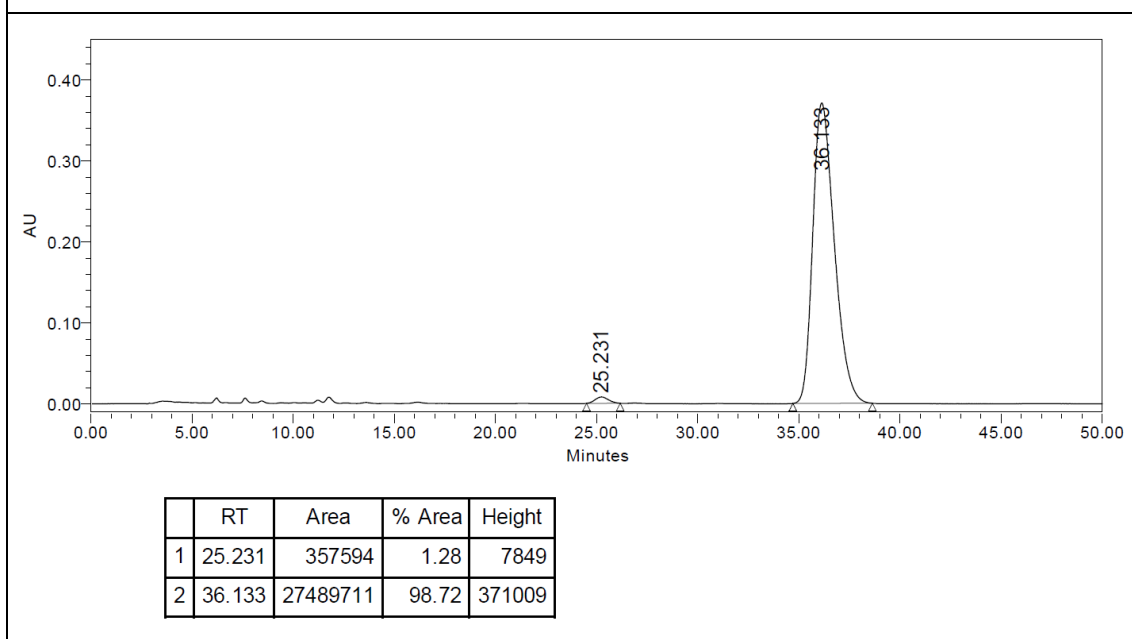



# SUPPLEMENTRAY INFORMATION

**Supplementary Fig. 150** HPLC analysis of *cis*-**3ai'**

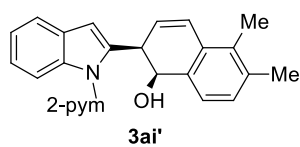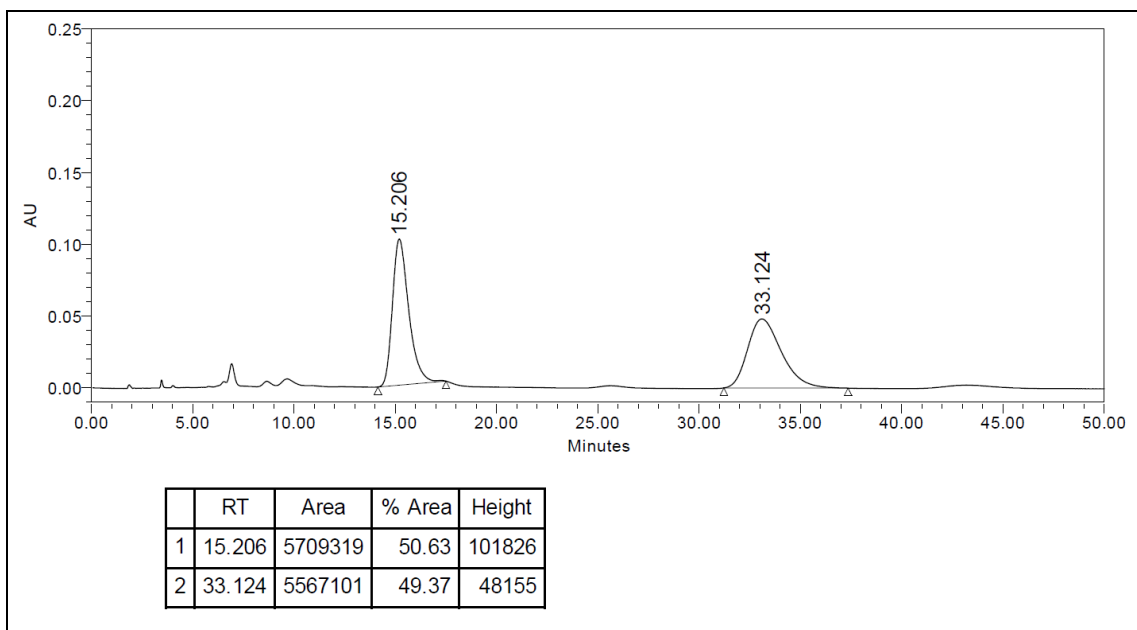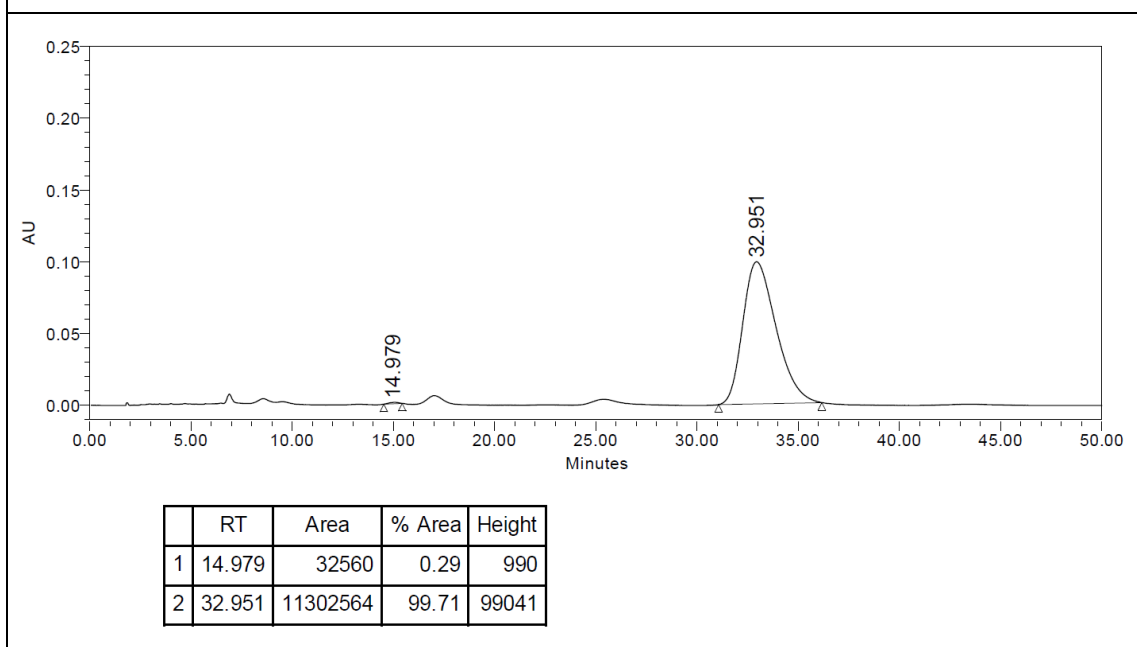

# SUPPLEMENTRAY INFORMATION

## Supplementary Fig. 151 HPLC analysis of *cis-7aa*

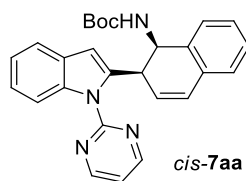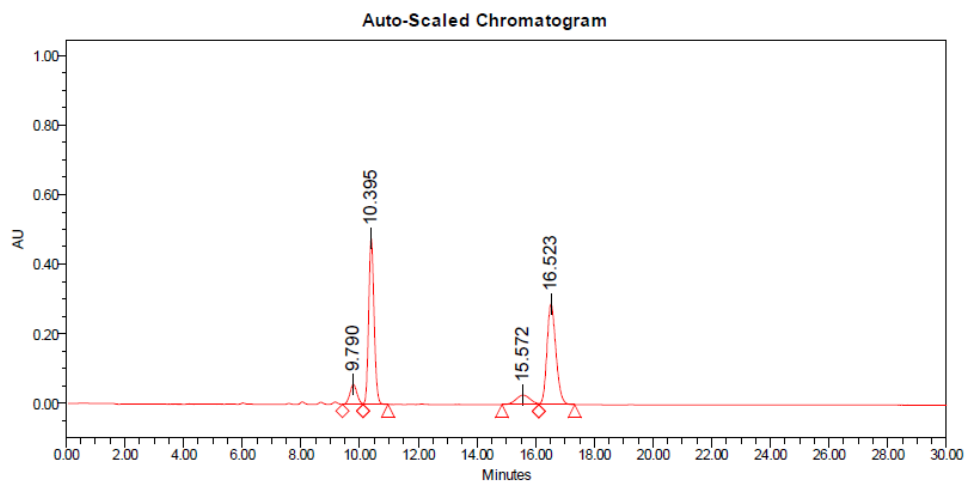

Peak Results

|   | SampleName   | RT     | Width (sec) | Height | Area    | % Area |
|---|--------------|--------|-------------|--------|---------|--------|
| 1 | zy-08-62-rac | 9.790  | 42.000      | 57063  | 968161  | 6.85   |
| 2 | zy-08-62-rac | 10.395 | 51.300      | 476892 | 6131092 | 43.35  |
| 3 | zy-08-62-rac | 15.572 | 75.500      | 27073  | 924101  | 6.53   |
| 4 | zy-08-62-rac | 16.523 | 73.700      | 288306 | 6120655 | 43.27  |

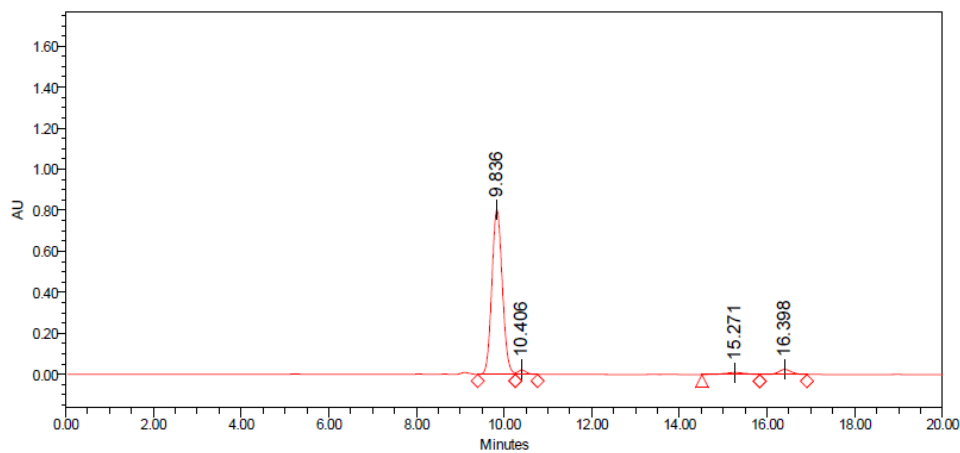

Peak Results

|   | SampleName | RT     | Width (sec) | Height | Area     | % Area |
|---|------------|--------|-------------|--------|----------|--------|
| 1 | ZY-08-105  | 9.836  | 51.400      | 802981 | 13293555 | 92.34  |
| 2 | ZY-08-105  | 10.406 | 30.300      | 21399  | 284576   | 1.98   |
| 3 | ZY-08-105  | 15.271 | 79.100      | 9095   | 300569   | 2.09   |
| 4 | ZY-08-105  | 16.398 | 64.600      | 24583  | 518297   | 3.60   |

# SUPPLEMENTRAY INFORMATION

## Supplementary Fig. 152 HPLC analysis of *cis*-7ab

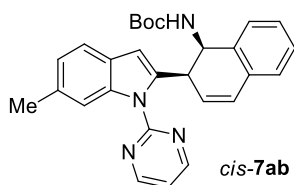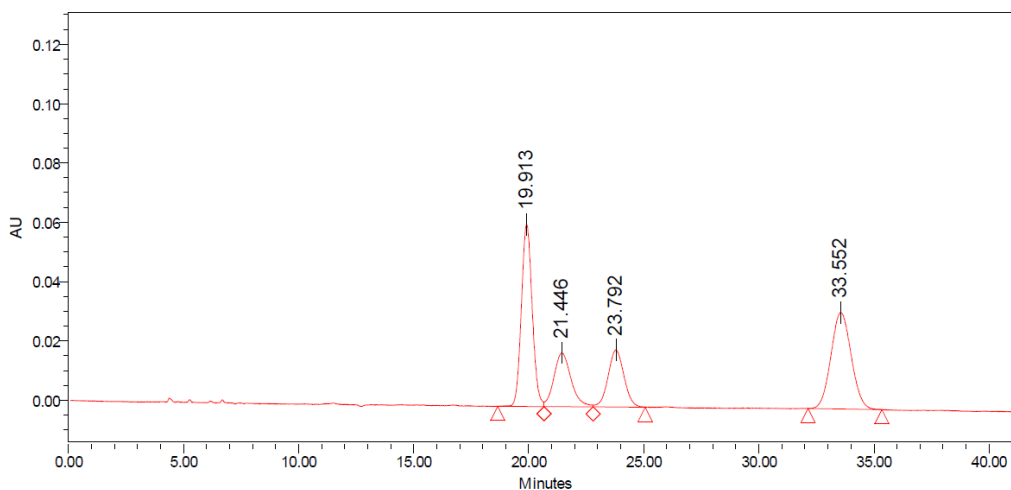

**Peak Results**

|   | SampleName   | RT     | Width (sec) | Height | Area    | % Area |
|---|--------------|--------|-------------|--------|---------|--------|
| 1 | zy-10-12-rac | 19.913 | 120.100     | 61390  | 2000489 | 34.20  |
| 2 | zy-10-12-rac | 21.446 | 128.500     | 18133  | 938051  | 16.03  |
| 3 | zy-10-12-rac | 23.792 | 135.500     | 19253  | 922676  | 15.77  |
| 4 | zy-10-12-rac | 33.552 | 192.100     | 32520  | 1988879 | 34.00  |

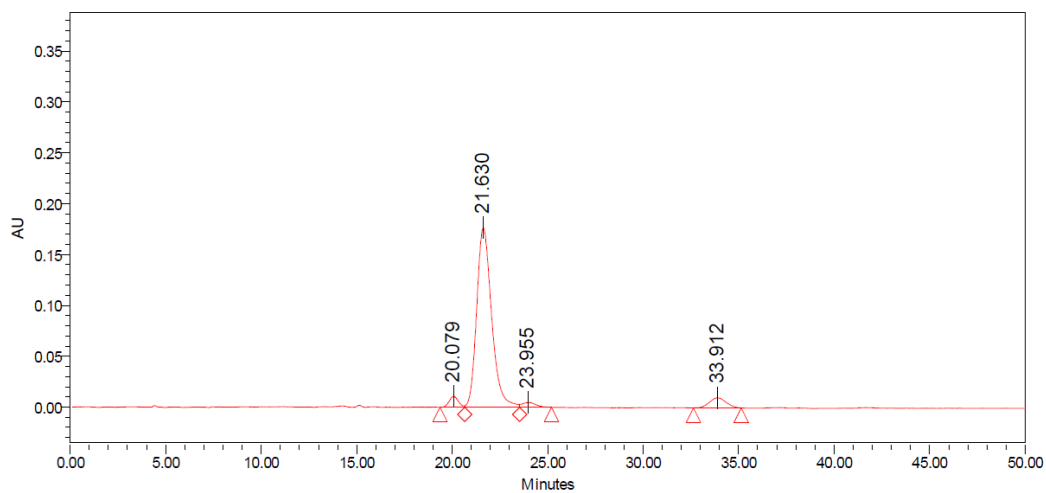

**Peak Results**

|   | SampleName   | RT     | Width (sec) | Height | Area    | % Area |
|---|--------------|--------|-------------|--------|---------|--------|
| 1 | zy-10-3-1-ch | 20.079 | 78.000      | 10865  | 358533  | 3.33   |
| 2 | zy-10-3-1-ch | 21.630 | 172.600     | 176579 | 9653853 | 88.82  |
| 3 | zy-10-3-1-ch | 23.955 | 100.300     | 4688   | 234099  | 2.18   |
| 4 | zy-10-3-1-ch | 33.912 | 150.400     | 10014  | 610068  | 5.67   |

# SUPPLEMENTRAY INFORMATION

## Supplementary Fig. 153 HPLC analysis of *cis-7ac*

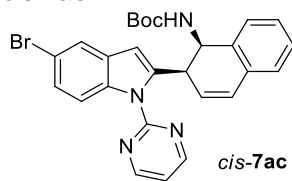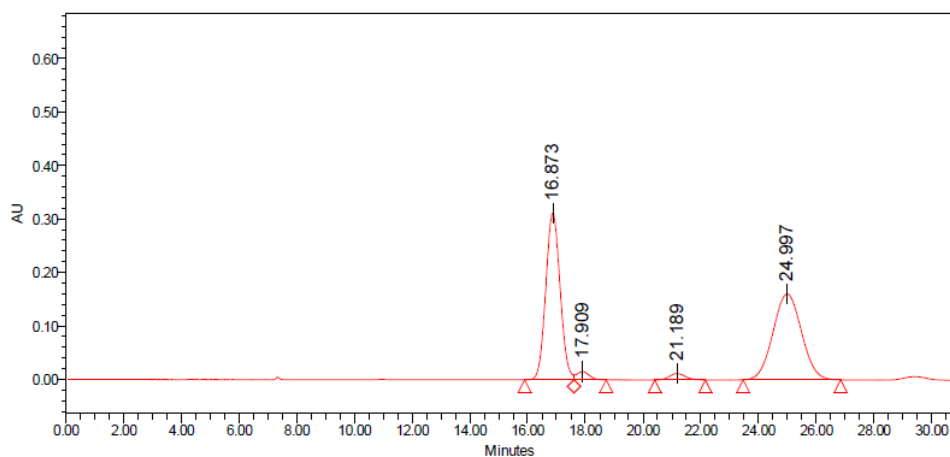

**Peak Results**

| SampleName       | RT     | Width (sec) | Height | Area     | % Area |
|------------------|--------|-------------|--------|----------|--------|
| 1 ZY-09-49-2-RAC | 16.873 | 102.800     | 311620 | 10702487 | 47.35  |
| 2 ZY-09-49-2-RAC | 17.909 | 66.800      | 15272  | 458308   | 2.03   |
| 3 ZY-09-49-2-RAC | 21.189 | 105.100     | 12075  | 450187   | 1.99   |
| 4 ZY-09-49-2-RAC | 24.997 | 202.800     | 160514 | 10992990 | 48.63  |

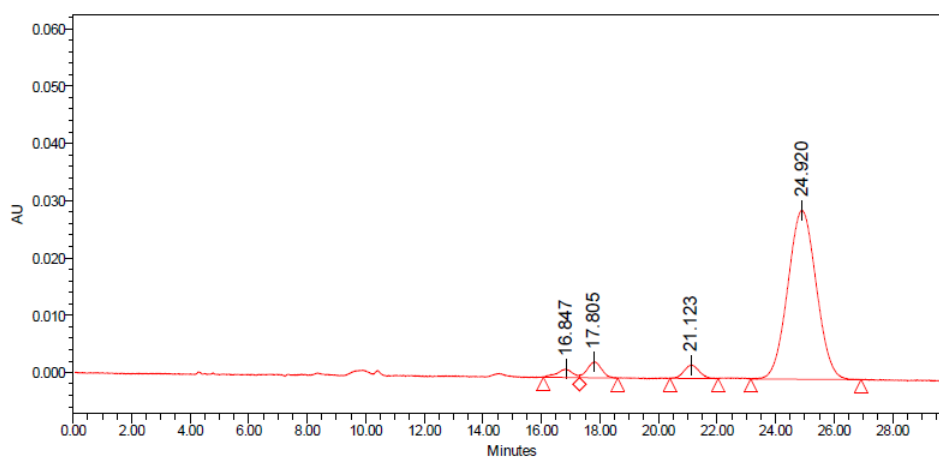

**Peak Results**

| SampleName      | RT     | Width (sec) | Height | Area    | % Area |
|-----------------|--------|-------------|--------|---------|--------|
| 1 ZY-09-49-1-CH | 16.847 | 73.800      | 1461   | 53023   | 2.38   |
| 2 ZY-09-49-1-CH | 17.805 | 78.700      | 2788   | 93335   | 4.19   |
| 3 ZY-09-49-1-CH | 21.123 | 98.800      | 2333   | 83319   | 3.74   |
| 4 ZY-09-49-1-CH | 24.920 | 226.000     | 29486  | 1996061 | 89.68  |

# SUPPLEMENTRAY INFORMATION

## Supplementary Fig. 154 HPLC analysis of *cis-7ad*

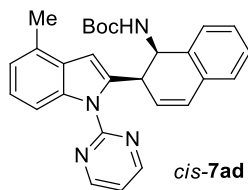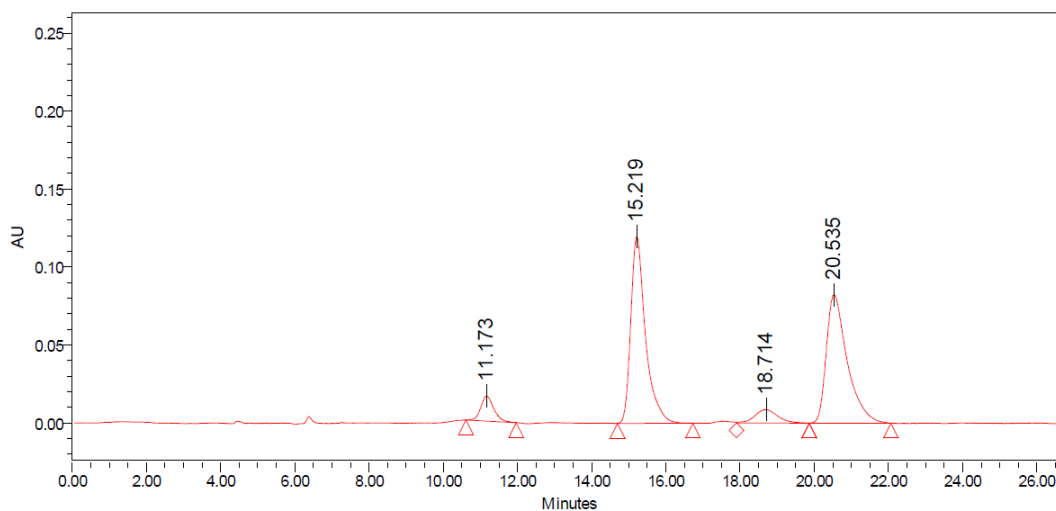

### Peak Results

|   | SampleName     | RT     | Width (sec) | Height | Area    | % Area |
|---|----------------|--------|-------------|--------|---------|--------|
| 1 | ZY-09-56-2-rac | 11.173 | 81.000      | 16088  | 392462  | 5.39   |
| 2 | ZY-09-56-2-rac | 15.219 | 122.000     | 119739 | 3312759 | 45.47  |
| 3 | ZY-09-56-2-rac | 18.714 | 117.500     | 8622   | 367914  | 5.05   |
| 4 | ZY-09-56-2-rac | 20.535 | 132.000     | 82338  | 3212565 | 44.09  |

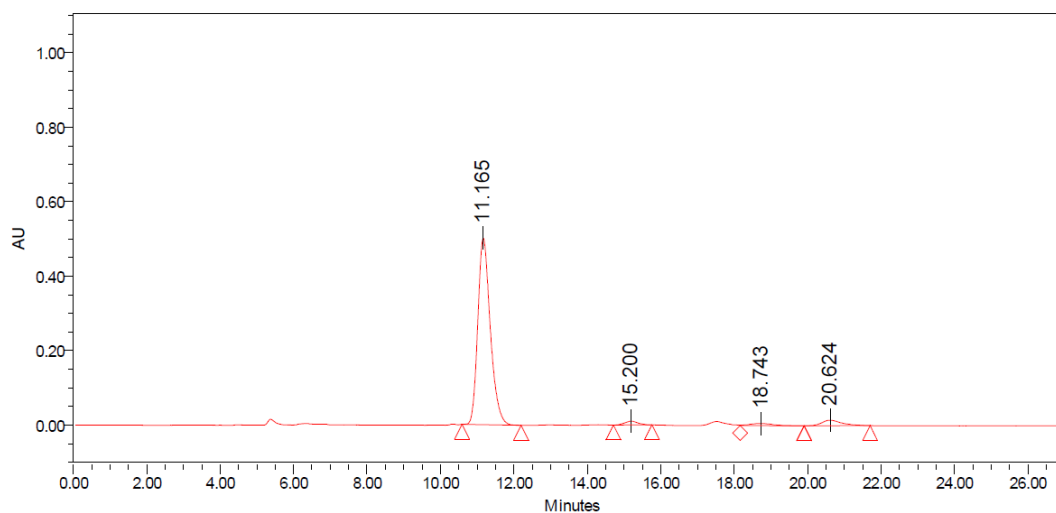

### Peak Results

|   | SampleName    | RT     | Width (sec) | Height | Area     | % Area |
|---|---------------|--------|-------------|--------|----------|--------|
| 1 | ZY-09-57-1-ch | 11.165 | 96.600      | 501648 | 11883771 | 91.68  |
| 2 | ZY-09-57-1-ch | 15.200 | 62.900      | 10085  | 258781   | 2.00   |
| 3 | ZY-09-57-1-ch | 18.743 | 104.800     | 5836   | 254031   | 1.96   |
| 4 | ZY-09-57-1-ch | 20.624 | 107.700     | 14902  | 565928   | 4.37   |

# SUPPLEMENTRAY INFORMATION

**Supplementary Fig. 155** HPLC analysis of *cis-7ae*

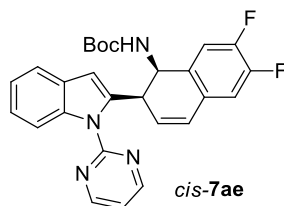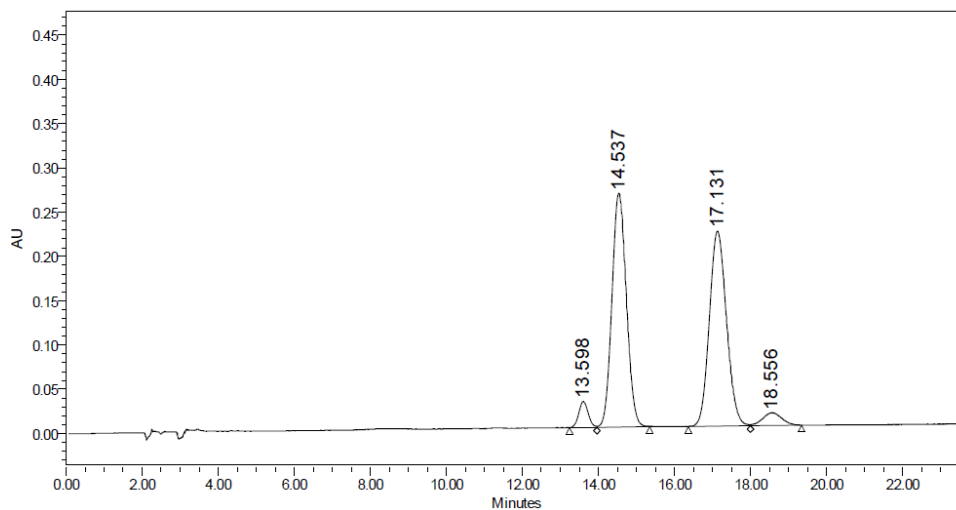

|   | RT     | Peak Type | Height | Width (sec) | Area    | % Area |
|---|--------|-----------|--------|-------------|---------|--------|
| 1 | 13.598 | Unknown   | 29337  | 43.300      | 505745  | 3.41   |
| 2 | 14.537 | Unknown   | 263811 | 83.450      | 6887099 | 46.50  |
| 3 | 17.131 | Unknown   | 220340 | 98.000      | 6906686 | 46.63  |
| 4 | 18.556 | Unknown   | 14406  | 80.800      | 510880  | 3.45   |

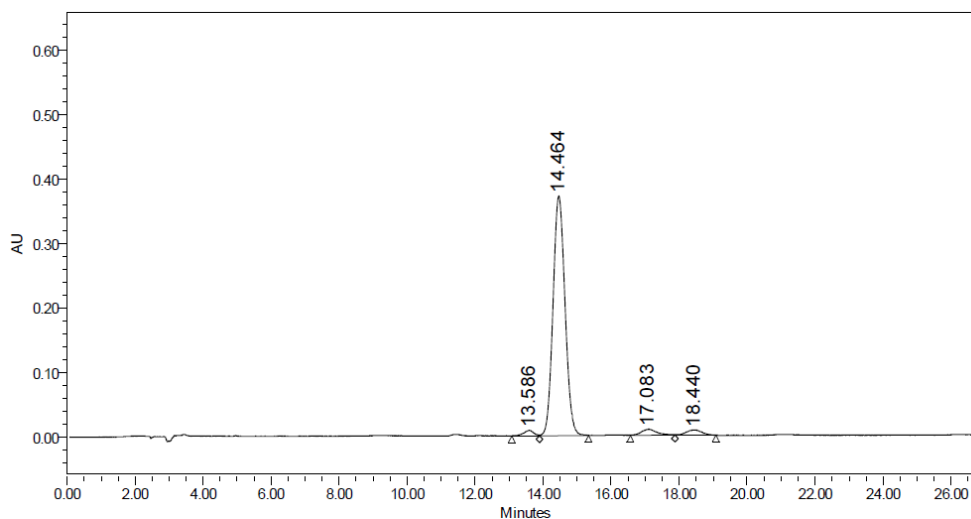

|   | RT     | Peak Type | Height | Width (sec) | Area    | % Area |
|---|--------|-----------|--------|-------------|---------|--------|
| 1 | 13.586 | Unknown   | 8220   | 49.250      | 163300  | 1.65   |
| 2 | 14.464 | Unknown   | 372154 | 86.500      | 9168483 | 92.64  |
| 3 | 17.083 | Unknown   | 9247   | 78.850      | 300193  | 3.03   |
| 4 | 18.440 | Unknown   | 8307   | 72.000      | 264952  | 2.68   |

# SUPPLEMENTRAY INFORMATION

**Supplementary Fig. 156** HPLC analysis of *cis-7af*

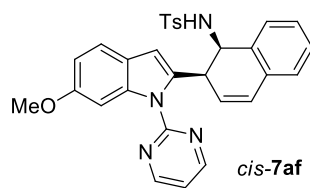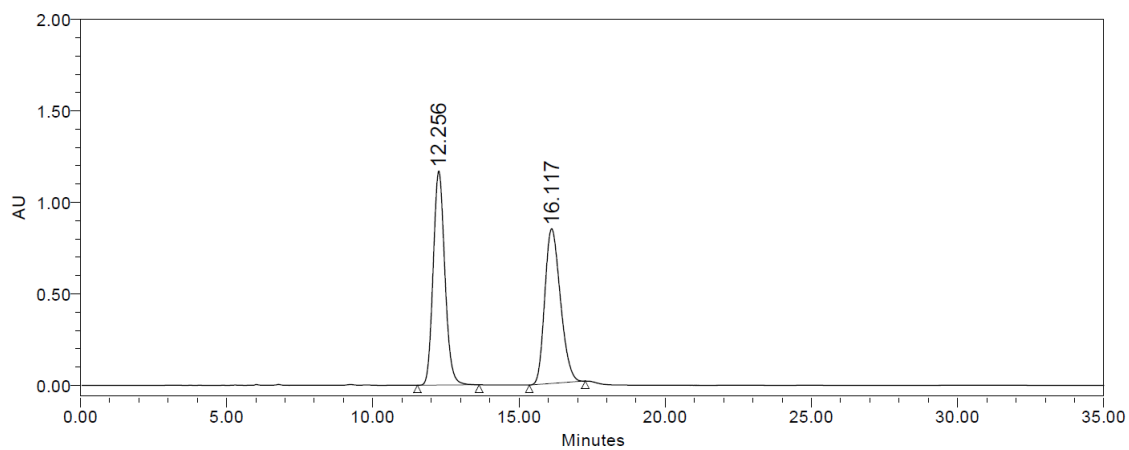

|   | RT     | Area     | % Area | Height  |
|---|--------|----------|--------|---------|
| 1 | 12.256 | 32455415 | 50.78  | 1169946 |
| 2 | 16.117 | 31453773 | 49.22  | 845455  |

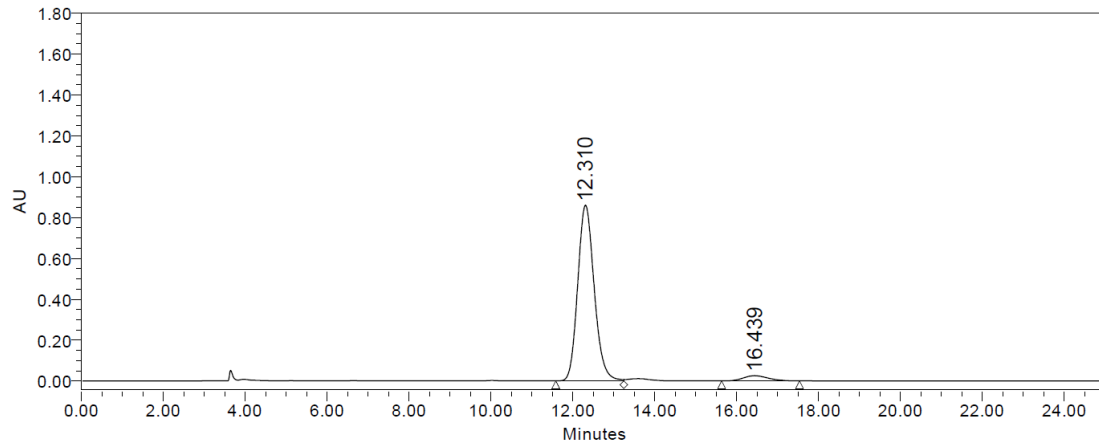

|   | RT     | Area     | % Area | Height |
|---|--------|----------|--------|--------|
| 1 | 12.310 | 24043500 | 95.73  | 859615 |
| 2 | 16.439 | 1073191  | 4.27   | 25407  |

# SUPPLEMENTRAY INFORMATION

## Supplementary Fig. 157 HPLC analysis of *trans*-7aa

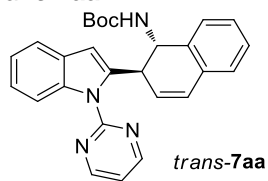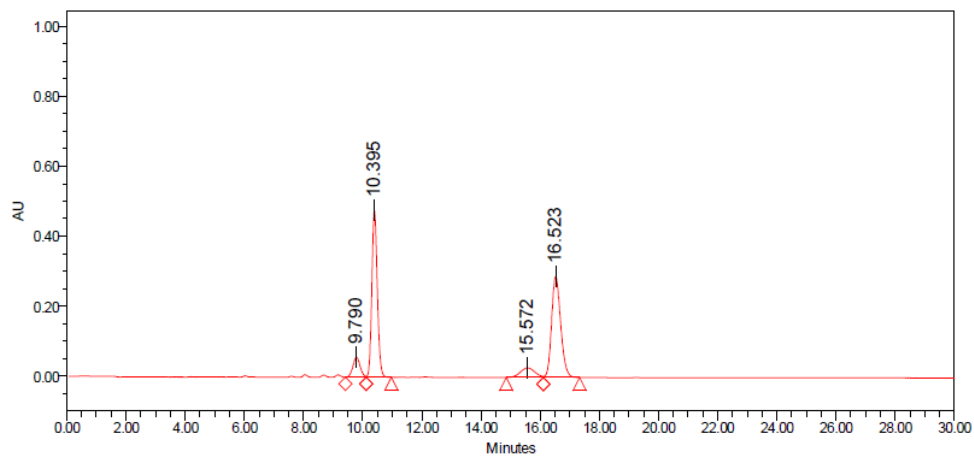

**Peak Results**

| SampleName     | RT     | Width (sec) | Height | Area    | % Area |
|----------------|--------|-------------|--------|---------|--------|
| 1 zy-08-62-rac | 9.790  | 42.000      | 57063  | 968161  | 6.85   |
| 2 zy-08-62-rac | 10.395 | 51.300      | 476892 | 6131092 | 43.35  |
| 3 zy-08-62-rac | 15.572 | 75.500      | 27073  | 924101  | 6.53   |
| 4 zy-08-62-rac | 16.523 | 73.700      | 288306 | 6120655 | 43.27  |

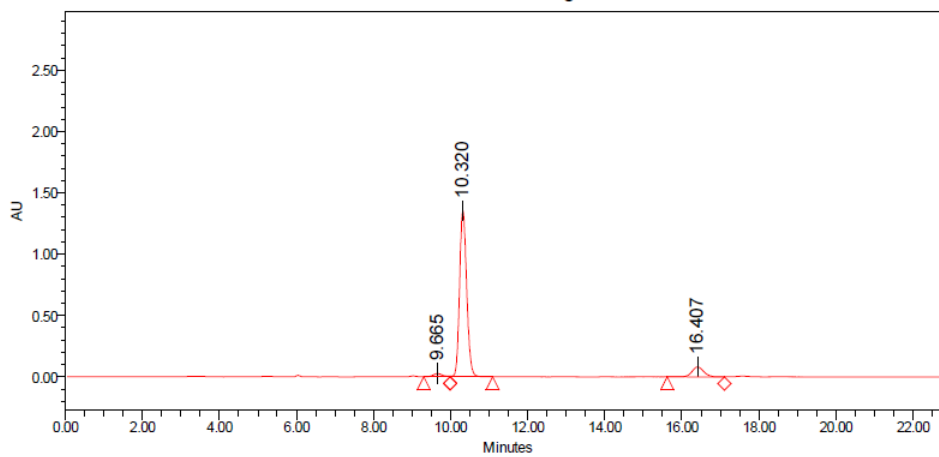

**Peak Results**

| SampleName  | RT     | Width (sec) | Height  | Area     | % Area |
|-------------|--------|-------------|---------|----------|--------|
| 1 zy-09-5-2 | 9.665  | 41.300      | 26019   | 446889   | 2.29   |
| 2 zy-09-5-2 | 10.320 | 66.000      | 1352548 | 17405594 | 89.00  |
| 3 zy-09-5-2 | 16.407 | 89.200      | 80346   | 1704913  | 8.72   |



# SUPPLEMENTRAY INFORMATION

## Supplementary Fig. 158 HPLC analysis of *trans*-7ab

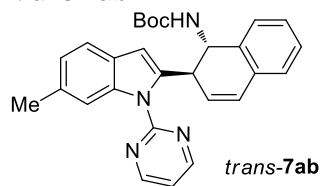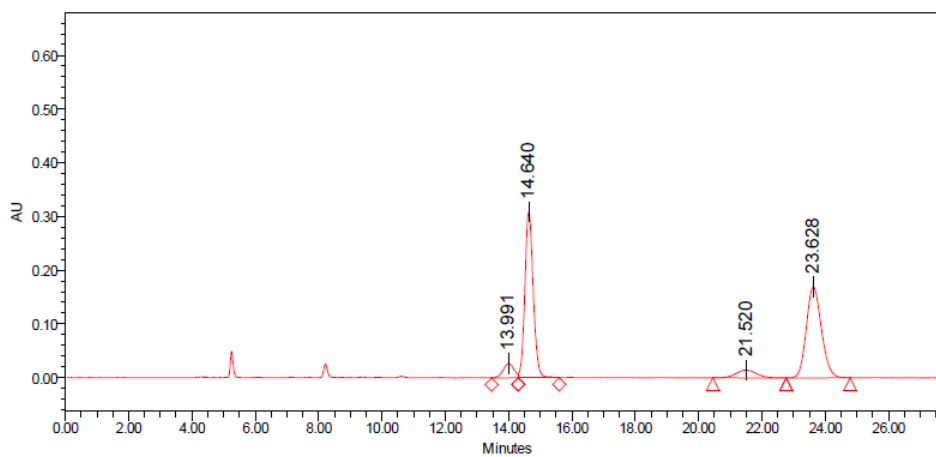

**Peak Results**

|   | SampleName     | RT     | Width (sec) | Height | Area    | % Area |
|---|----------------|--------|-------------|--------|---------|--------|
| 1 | ZY-09-37-1-RAC | 13.991 | 50.300      | 26908  | 629523  | 5.02   |
| 2 | ZY-09-37-1-RAC | 14.640 | 77.900      | 308716 | 5646665 | 45.06  |
| 3 | ZY-09-37-1-RAC | 21.520 | 139.100     | 14414  | 640512  | 5.11   |
| 4 | ZY-09-37-1-RAC | 23.628 | 120.900     | 169582 | 5613388 | 44.80  |

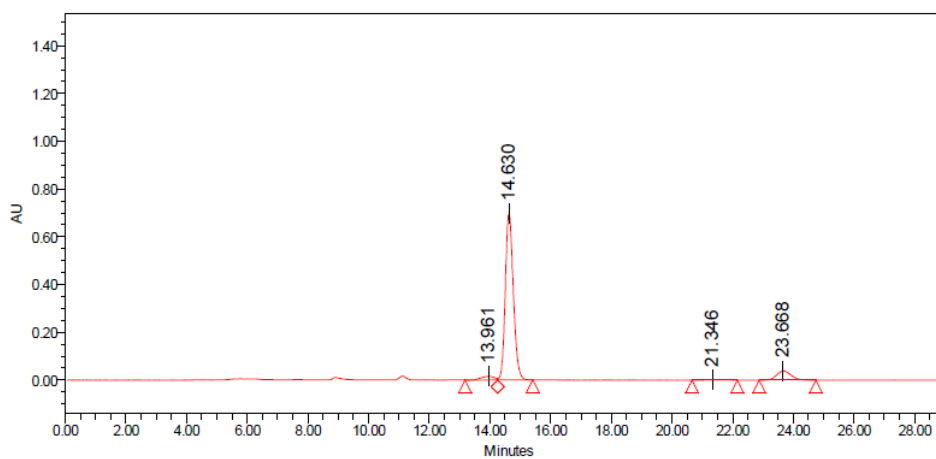

**Peak Results**

|   | SampleName    | RT     | Width (sec) | Height | Area     | % Area |
|---|---------------|--------|-------------|--------|----------|--------|
| 1 | ZY-09-36-1-CH | 13.961 | 64.400      | 15635  | 469581   | 3.22   |
| 2 | ZY-09-36-1-CH | 14.630 | 69.800      | 696677 | 12779610 | 87.76  |
| 3 | ZY-09-36-1-CH | 21.346 | 89.200      | 1659   | 50039    | 0.34   |
| 4 | ZY-09-36-1-CH | 23.668 | 112.200     | 38353  | 1262320  | 8.67   |

# SUPPLEMENTRAY INFORMATION

**Supplementary Fig. 159** HPLC analysis of *trans-7ab'*

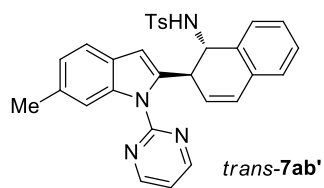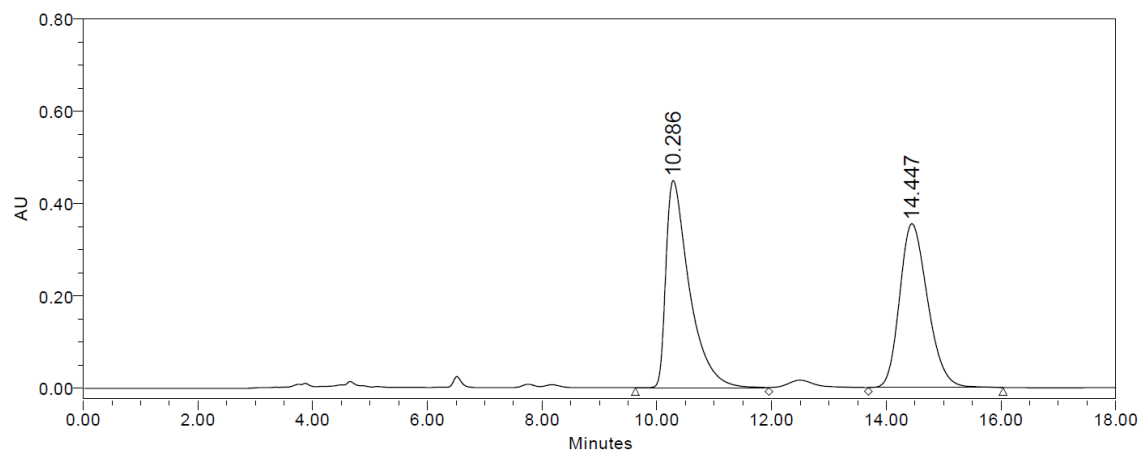

|   | RT     | Area     | % Area | Height |
|---|--------|----------|--------|--------|
| 1 | 10.286 | 12733819 | 51.37  | 448858 |
| 2 | 14.447 | 12056300 | 48.63  | 354922 |

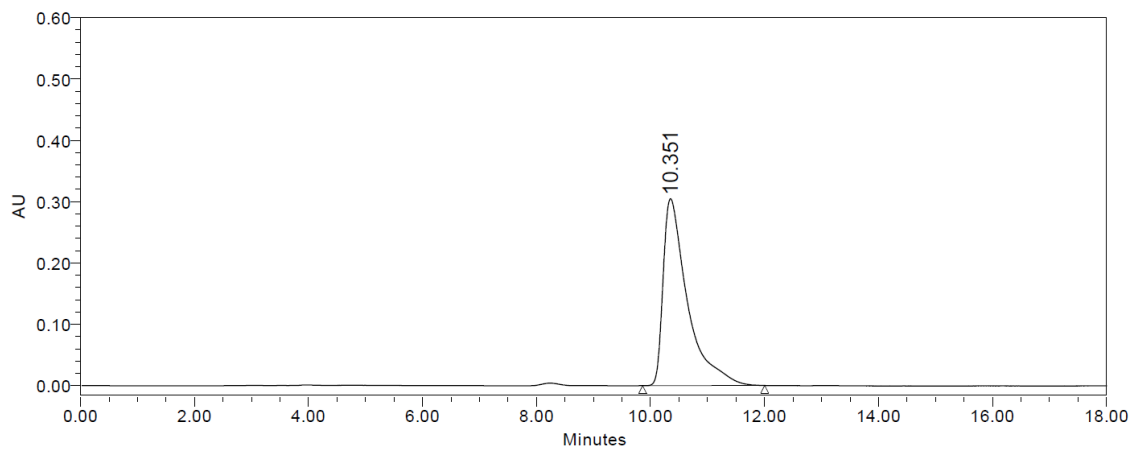

|   | RT     | Area    | % Area | Height |
|---|--------|---------|--------|--------|
| 1 | 10.351 | 9051573 | 100.00 | 304860 |

# SUPPLEMENTARY INFORMATION

## Supplementary Fig. 160 HPLC analysis of *trans*-7ac

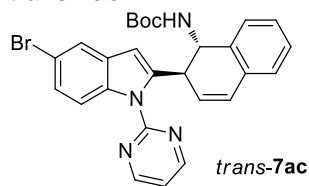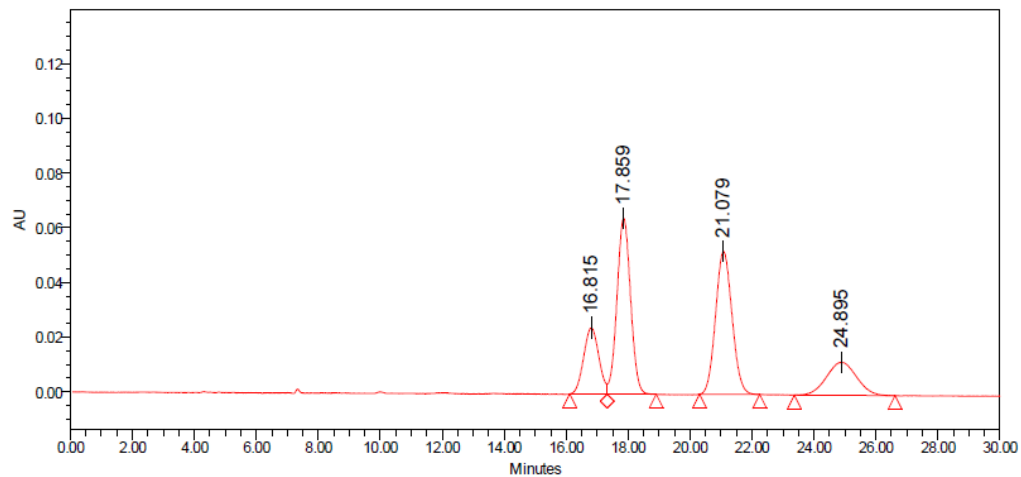

**Peak Results**

|   | SampleName     | RT     | Width (sec) | Height | Area    | % Area |
|---|----------------|--------|-------------|--------|---------|--------|
| 1 | ZY-09-48-2-RAC | 16.815 | 72.500      | 24228  | 822620  | 14.89  |
| 2 | ZY-09-48-2-RAC | 17.859 | 95.200      | 64259  | 1955427 | 35.40  |
| 3 | ZY-09-48-2-RAC | 21.079 | 116.600     | 52294  | 1928384 | 34.91  |
| 4 | ZY-09-48-2-RAC | 24.895 | 194.900     | 12124  | 818093  | 14.81  |

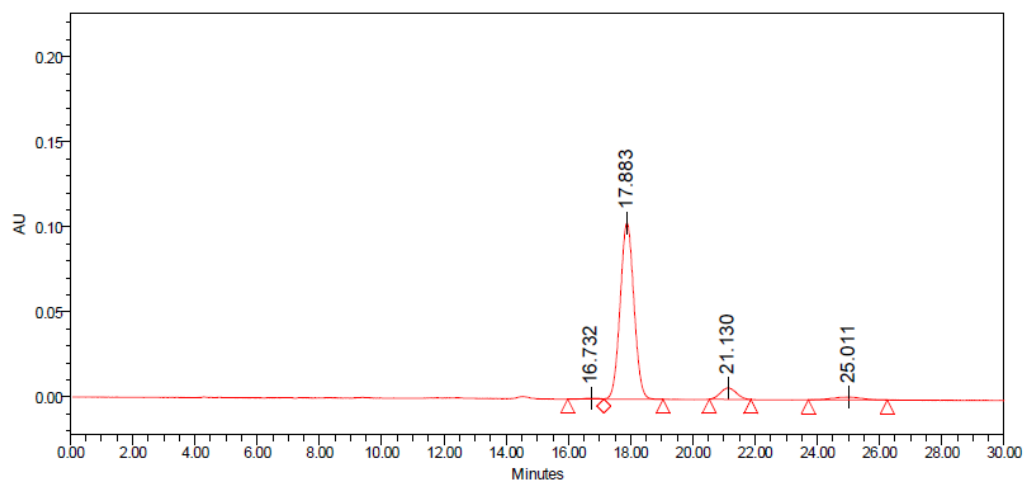

**Peak Results**

|   | SampleName    | RT     | Width (sec) | Height | Area    | % Area |
|---|---------------|--------|-------------|--------|---------|--------|
| 1 | ZY-09-48-1-CH | 16.732 | 69.200      | 595    | 19427   | 0.55   |
| 2 | ZY-09-48-1-CH | 17.883 | 114.200     | 103669 | 3178850 | 89.71  |
| 3 | ZY-09-48-1-CH | 21.130 | 80.300      | 6745   | 238176  | 6.72   |
| 4 | ZY-09-48-1-CH | 25.011 | 152.400     | 1666   | 107066  | 3.02   |

# SUPPLEMENTRAY INFORMATION

## Supplementary Fig. 161 HPLC analysis of *trans*-7ad

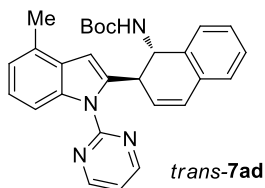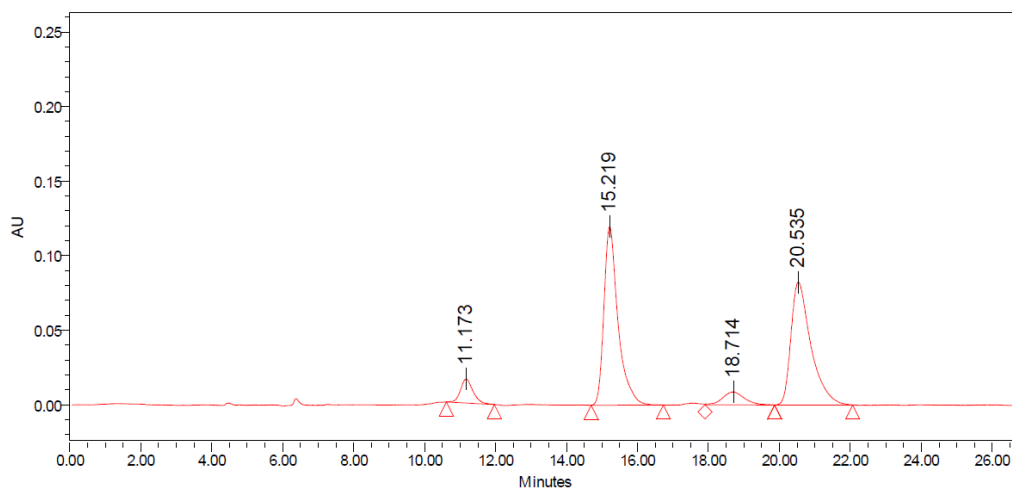

**Peak Results**

| SampleName       | RT     | Width (sec) | Height | Area    | % Area |
|------------------|--------|-------------|--------|---------|--------|
| 1 ZY-09-56-2-rac | 11.173 | 81.000      | 16088  | 392462  | 5.39   |
| 2 ZY-09-56-2-rac | 15.219 | 122.000     | 119739 | 3312759 | 45.47  |
| 3 ZY-09-56-2-rac | 18.714 | 117.500     | 8622   | 367914  | 5.05   |
| 4 ZY-09-56-2-rac | 20.535 | 132.000     | 82338  | 3212565 | 44.09  |

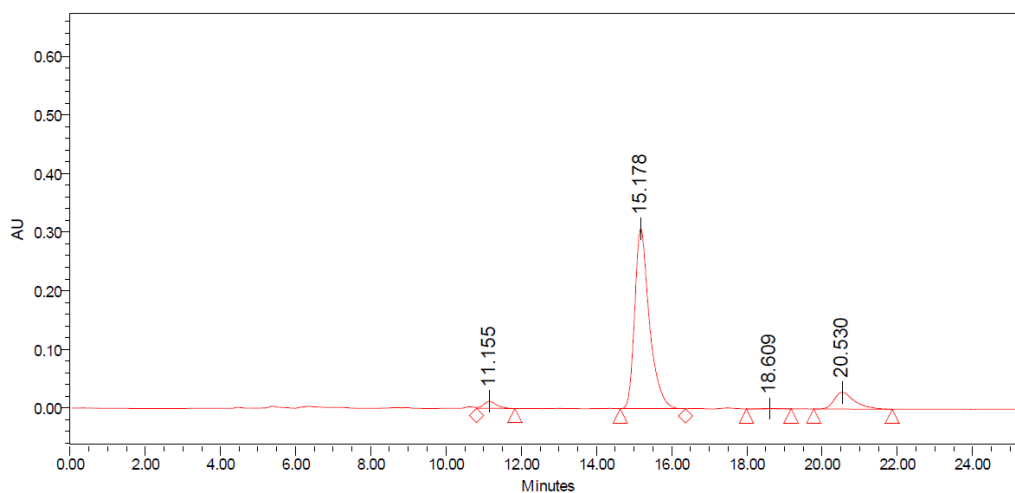

**Peak Results**

| SampleName      | RT     | Width (sec) | Height | Area    | % Area |
|-----------------|--------|-------------|--------|---------|--------|
| 1 ZY-09-56-1-ch | 11.155 | 61.300      | 11876  | 280750  | 2.91   |
| 2 ZY-09-56-1-ch | 15.178 | 104.100     | 307068 | 8278482 | 85.78  |
| 3 ZY-09-56-1-ch | 18.609 | 71.800      | 466    | 14708   | 0.15   |
| 4 ZY-09-56-1-ch | 20.530 | 125.400     | 28475  | 1076600 | 11.16  |

# SUPPLEMENTARY INFORMATION

**Supplementary Fig. 162** HPLC analysis of *trans-7ae*

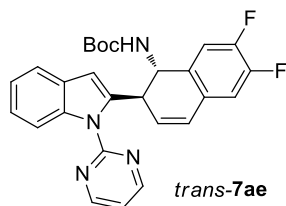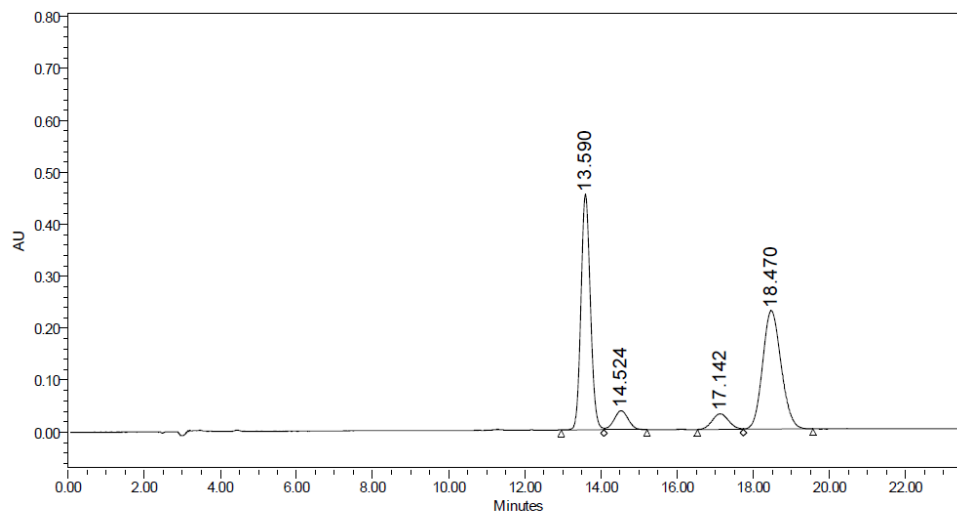

|   | RT     | Peak Type | Height | Width (sec) | Area    | % Area |
|---|--------|-----------|--------|-------------|---------|--------|
| 1 | 13.590 | Unknown   | 453633 | 67.300      | 7833791 | 44.87  |
| 2 | 14.524 | Unknown   | 36760  | 67.850      | 959757  | 5.50   |
| 3 | 17.142 | Unknown   | 30223  | 72.450      | 914189  | 5.24   |
| 4 | 18.470 | Unknown   | 228215 | 109.550     | 7750194 | 44.39  |

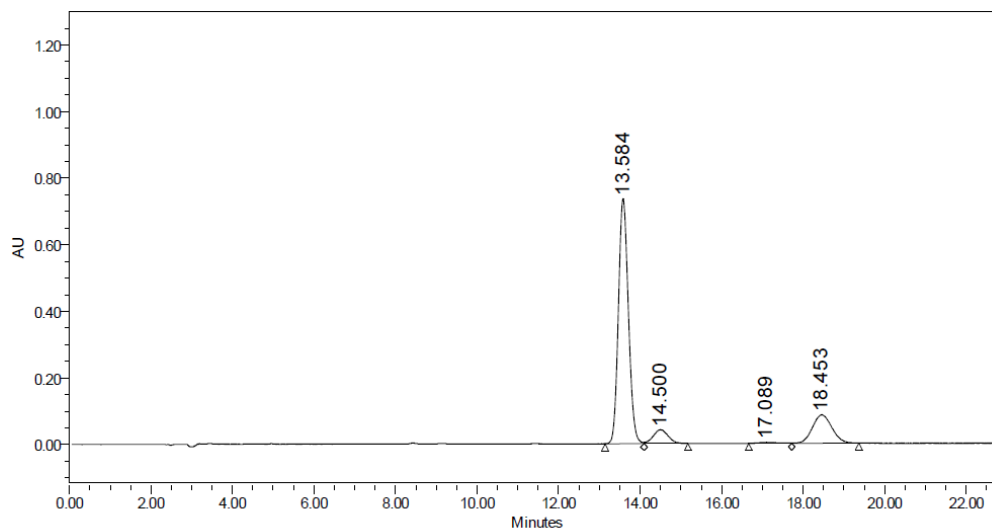

|   | RT     | Peak Type | Height | Width (sec) | Area     | % Area |
|---|--------|-----------|--------|-------------|----------|--------|
| 1 | 13.584 | Unknown   | 735719 | 57.400      | 12558996 | 75.81  |
| 2 | 14.500 | Unknown   | 42006  | 64.250      | 1065043  | 6.43   |
| 3 | 17.089 | Unknown   | 3013   | 63.350      | 95698    | 0.58   |
| 4 | 18.453 | Unknown   | 85291  | 98.850      | 2847372  | 17.19  |

# SUPPLEMENTRAY INFORMATION

**Supplementary Fig. 163** HPLC analysis of *trans*-7af

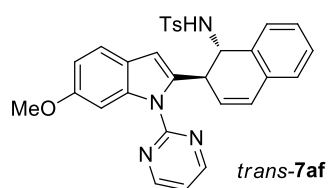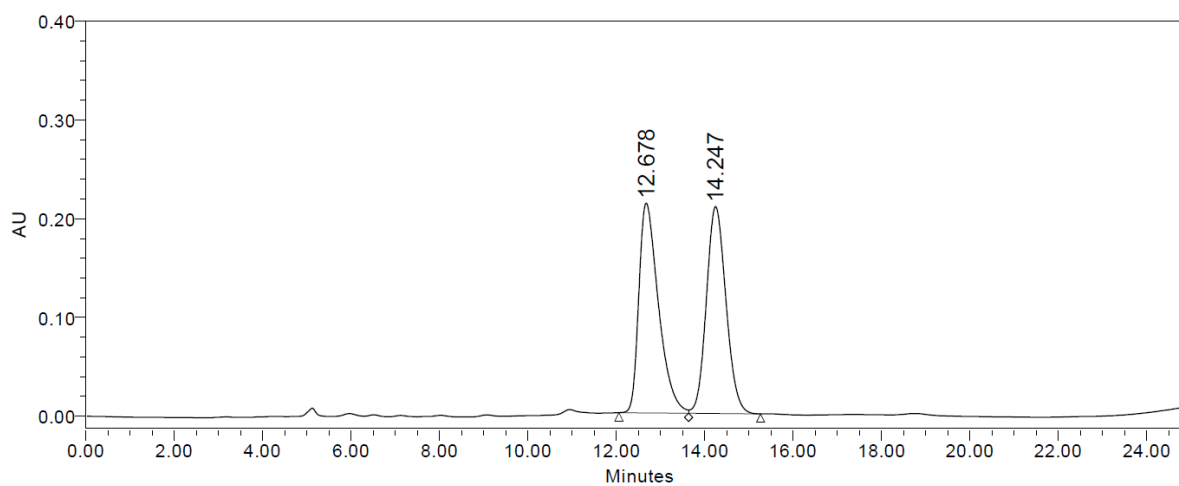

|   | RT     | Area    | % Area | Height |
|---|--------|---------|--------|--------|
| 1 | 12.678 | 6552277 | 50.35  | 212517 |
| 2 | 14.247 | 6461530 | 49.65  | 209587 |

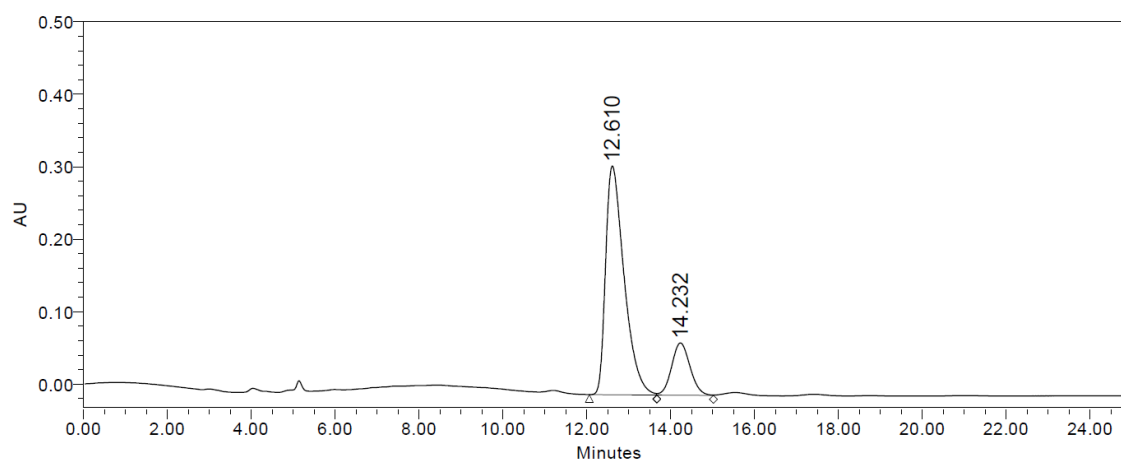

|   | RT     | Area    | % Area | Height |
|---|--------|---------|--------|--------|
| 1 | 12.610 | 9680877 | 81.51  | 315831 |
| 2 | 14.232 | 2196046 | 18.49  | 72146  |

# SUPPLEMENTRAY INFORMATION

## Supplementary Fig. 164 HPLC analysis of 4

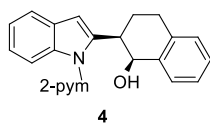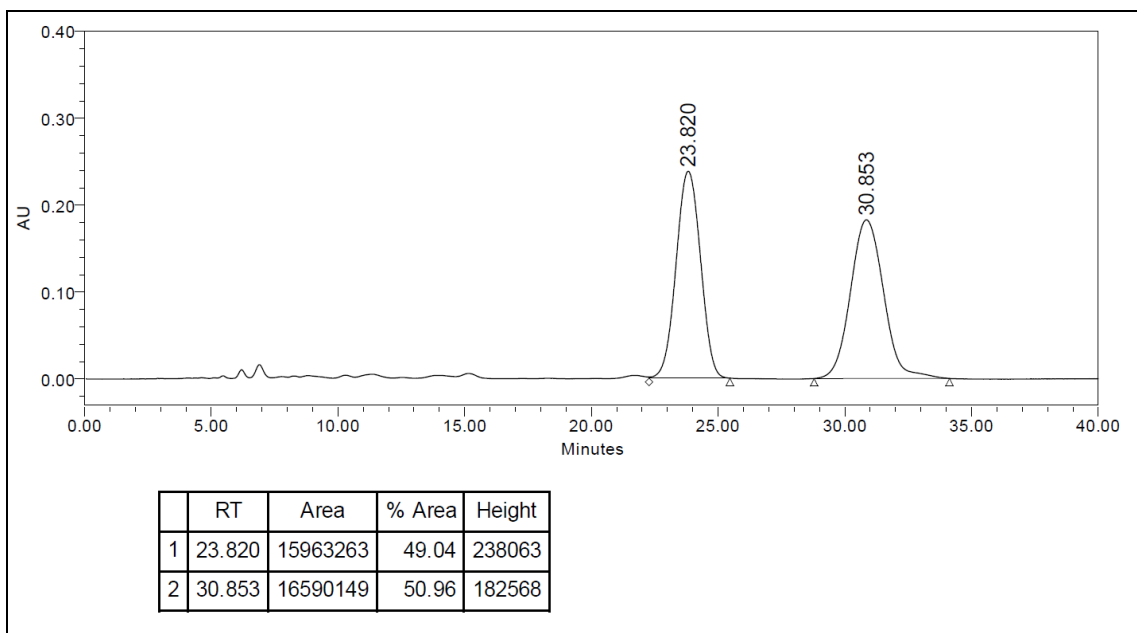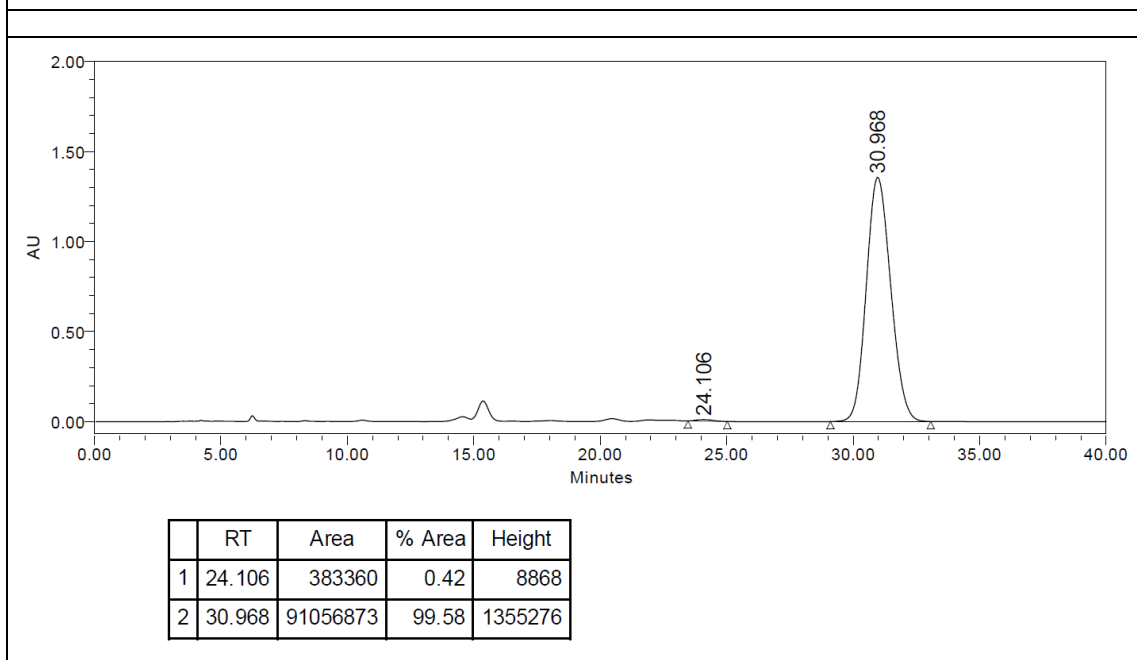

# SUPPLEMENTRAY INFORMATION

## Supplementary Fig. 165 HPLC analysis of 5

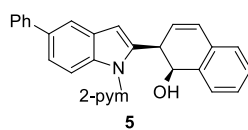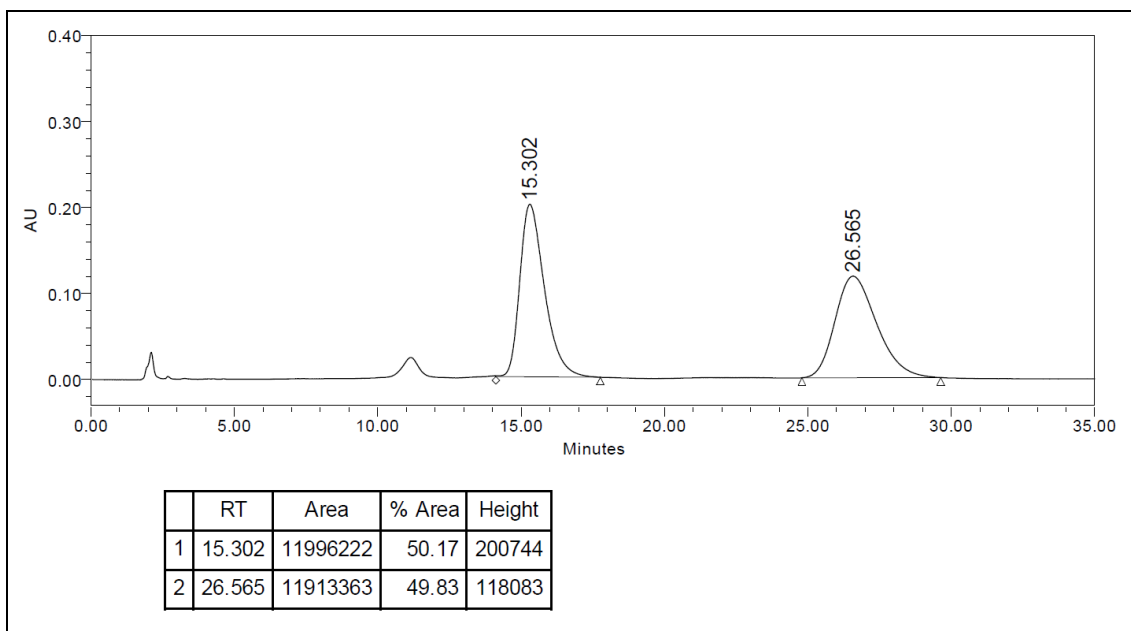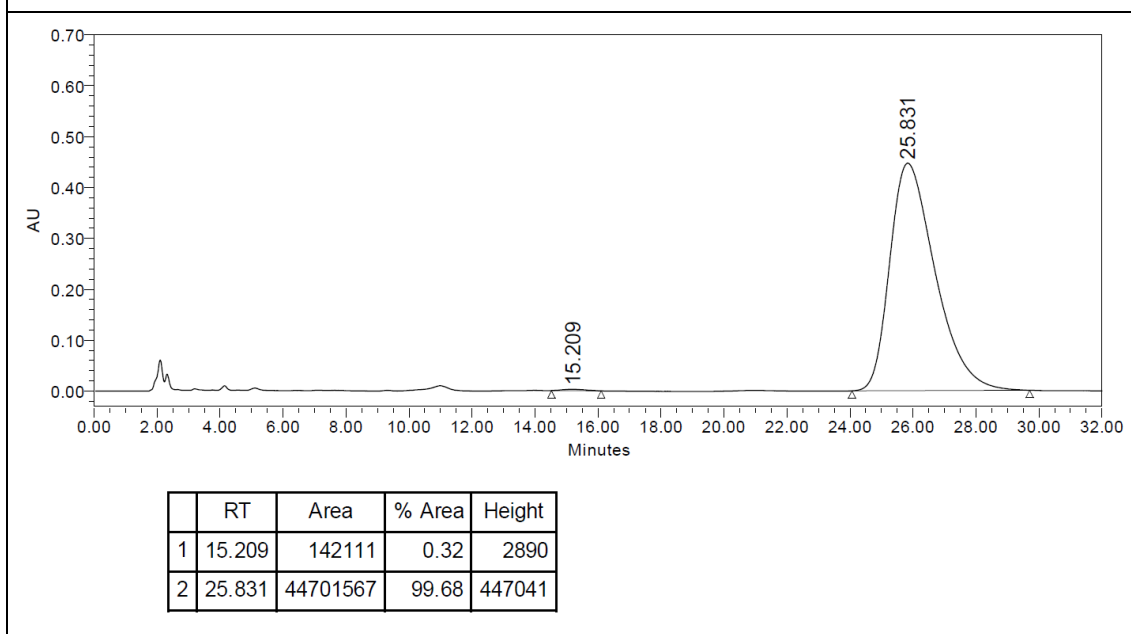



# SUPPLEMENTRAY INFORMATION

**Supplementary Fig. 166** HPLC analysis of **8**

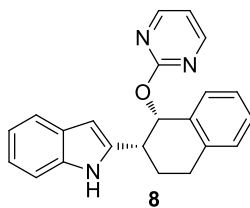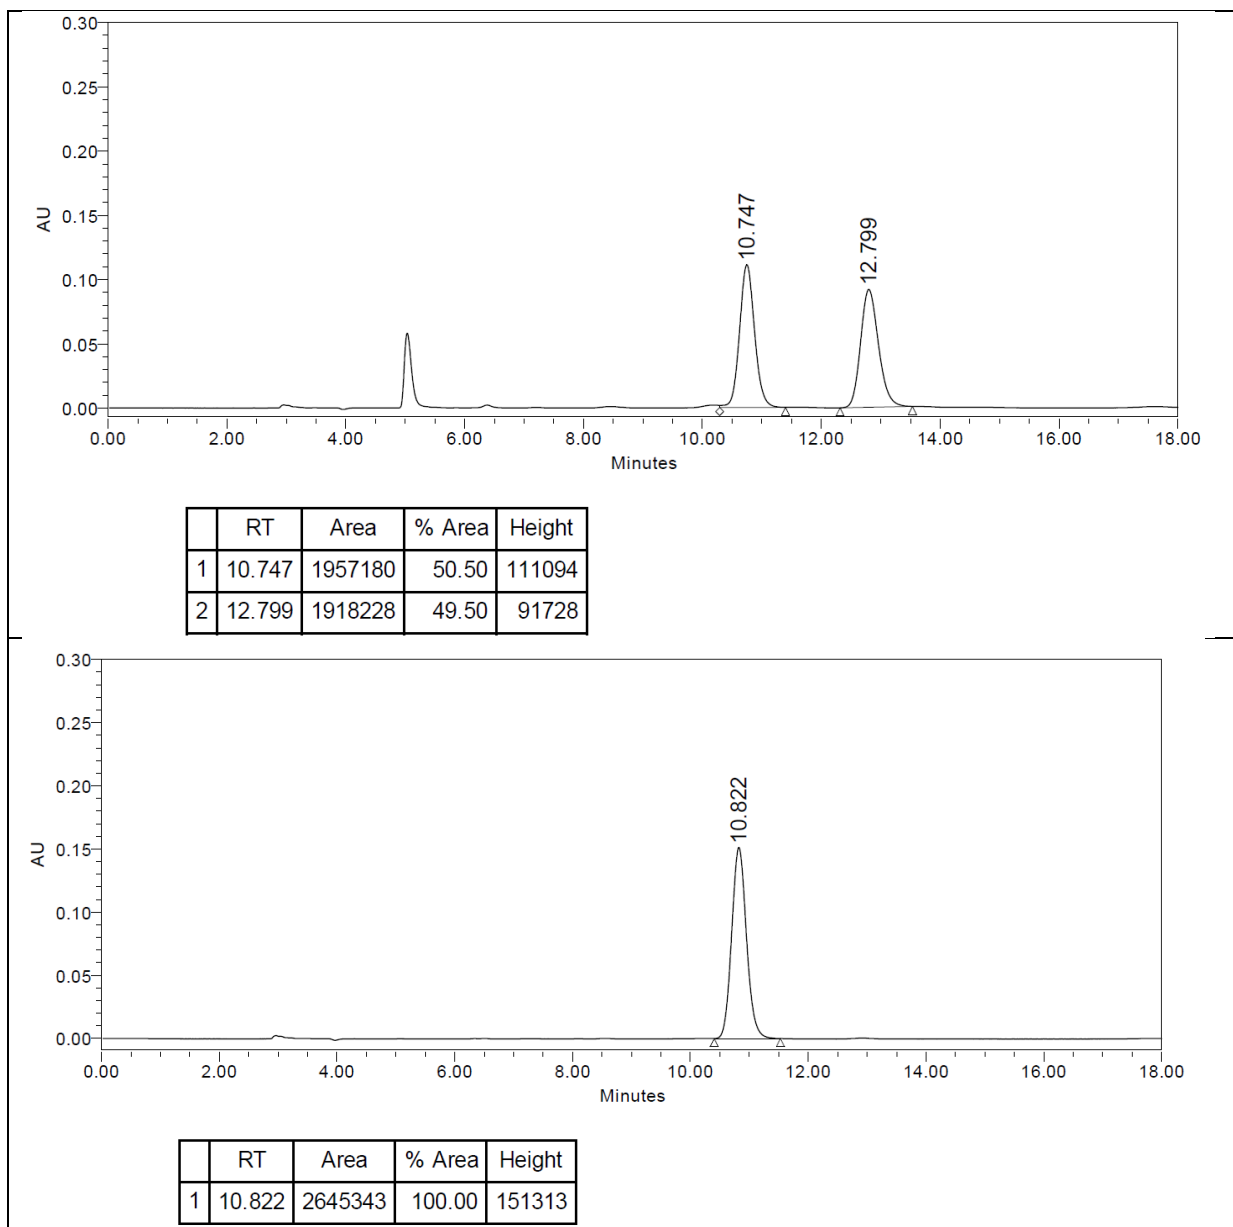

## 2. References

1. K. Ozols, Y. S. Jang, N. Cramer, *J. Am. Chem. Soc.* **2019**, *141*, 5675-5680.
2. K. Muralirajan, S. Prakash, C.-H. Cheng, *Adv. Synth. Catal.* **2017**, *359*, 513-518.
3. a) Y.-H. Liu, P.-P. Xie, L. Liu, J. Fan, Z.-Z. Zhang, X. Hong, B.-F. Shi, *J. Am. Chem. Soc.* **2021**, *143*, 19112-19120; b) C. M. Rathbun, J. B. Johnson, *J. Am. Chem. Soc.* **2011**, *133*, 2031-2033; c) L. van Dijk, R. Ardkhean, M. Sidera, S. Karabiyikoglu, Ö. Sari, T. D. W. Claridge, G. C. Lloyd-Jones, R. S. Paton, S. P. Fletcher, *Nat. Catal.* **2021**, *4*, 284-292.
4. Gaussian 16, Revision A.03, M. J. Frisch, G. W. Trucks, H. B. Schlegel, G. E. Scuseria, M. A. Robb, J. R. Cheeseman, G. Scalmani, V. Barone, G. A. Petersson, H. Nakatsuji, X. Li, M. Caricato, A. V. Marenich, J. Bloino, B. G. Janesko, R. Gomperts, B. Mennucci, H. P. Hratchian, J. V. Ortiz, A. F. Izmaylov, J. L. Sonnenberg, D. Williams-Young, F. Ding, F. Lipparini, F. Egidi, J. Goings, B. Peng, A. Petrone, T. Henderson, D. Ranasinghe, V. G. Zakrzewski, J. Gao, N. Rega, G. Zheng, W. Liang, M. Hada, M. Ehara, K. Toyota, R. Fukuda, J. Hasegawa, M. Ishida, T. Nakajima, Y. Honda, O. Kitao, H. Nakai, T. Vreven, K. Throssell, J. A. Jr. Montgomery, J. E. Peralta, F. Ogliaro, M. J. Bearpark, J. J. Heyd, E. N. Brothers, K. N. Kudin, V. N. Staroverov, T. A. Keith, R. Kobayashi, J. K. Normand, Rendell, A. P. Raghavachari, J. C. Burant, S. S. Iyengar, J. Tomasi, M. Cossi, J. M. Millam, M. Klene, C. Adamo, R. Cammi, J. W. Ochterski, R. L. Martin, K. Morokuma, O. Farkas, J. B. Foresman, D. J. Fox, Gaussian, Inc., Wallingford CT, **2016**.
5. a) F. Neese, *WIREs Comput. Mol. Sci.* **2012**, *2*, 73-78; b) F. Neese, *WIREs Comput. Mol. Sci.* **2017**, *8*, e1327; c) F. Neese, F. Wennmohs, U. Becker, C. Riplinger, *J. Chem. Phys.* **2020**, *152*, 224108.
6. a) A. D. Becke, *J. Chem. Phys.* **1993**, *98*, 5648-5652; b) C. Lee, W. Yang, R. G. Parr, *Phys. Rev. B: Condens. Matter Mater. Phys.* **1988**, *37*, 785-789; c) P. J. Stephens, F. J. Devlin, C. F. Chabalowski, M. J. Frisch, *J. Phys. Chem.* **1994**, *98*, 11623-11627.
7. a) E. R. Johnson, A. D. Becke, *J. Chem. Phys.* **2005**, *123*, 024101; b) A. D. Becke, E. R. Johnson, *J. Chem. Phys.* **2005**, *122*, 154104; c) E. R. Johnson, A. D. Becke, *J. Chem. Phys.* **2006**, *124*, 174104; d) S. Grimme, J. Antony, S. Ehrlich, H. Krieg, *J. Chem. Phys.* **2010**, *132*, 154104; e) S. Grimme, S. Ehrlich, L. Goerigk, *J. Comput. Chem.* **2011**, *32*, 1456-1465.
8. a) F. Weigend, R. Ahlrichs, *Phys. Chem. Chem. Phys.* **2005**, *7*, 3297-3305; b) F. Weigend, *Phys. Chem. Chem. Phys.* **2006**, *8*, 1057-1065.
9. A. Hellweg, C. Hattig, S. Hofener, Klopffer, W. *Theor. Chem. Acc.* **2007**, *117*, 587-597.
10. F. Weigend, *J. Comput. Chem.* **2008**, *29*, 167-175.
11. W. Humphrey, A. Dalke, K. Schulten, *J. Mol. Graph.* **1996**, *14*, 33-38.
12. X. Yang, G. Zheng, X. Li, *Angew. Chem. Int. Ed.* **2019**, *58*, 322-326.
13. L. Kong, S. Yu, G. Tang, H. Wang, X. Zhou, X. Li, *Org. Lett.* **2016**, *18*, 3802-3805.
14. X. Zhou, Y. Luo, L. Kong, Y. Xu, G. Zheng, Y. Lan, X. Li, *ACS Catal.* **2017**, *7*, 7296-7304.
