# Supplementary material for: Cobalt(III)-catalyzed asymmetric ring-opening of 7-oxabenzonorbornadienes via indole C–H functionalization
Source: PubMed Central journal article supplement (PMC9968317; doi:10.1038/s41467-023-36723-6), 2023-02-25
Supplement: 41467_2023_36723_MOESM2_ESM.pdf [file 41467_2023_36723_MOESM2_ESM.pdf]

## **Description of Additional Supplementary Files**

**Supplementary Data 1:** Cartesian Coordinates and Energies of Calculated Structures
